# Supplementary material for: Heritability and genetic basis of protein level variation in an outbred population
Source: HighWire-hosted journal article supplement (doi:10.1101/gr.170506.113), 2014-05-13
Supplement: Supplemental_Legends.docx [file Supplemental_Legends.docx]

**Supplementary Information**

Supplementary Figure 1. Example gating of cytometry data. **a**. Representative example of fitting filters to a plate of a screen. Forward scatter pulse area (FSC-A) and side scatter pulse width (SSC-W) is plotted for 2000 random cells from 48 random wells from one plate of one replicate screen. The red rectangle shows a typical inclusion filter applied to cells from the screen before analysis. **b**. Representative example of fitting filters based on red fluorescence (mCherry) signal. Proxy for cell size (FSC-A) and mCherry level (mCherry-A) is plotted for 2000 random cells coming from 48 random wells from one plate of one replicate screen. The red rectangle shows a typical inclusion filter applied to cells from the screen before analysis. **c**. Representative example of clustering the filtered cells for budding state and mCherry signal. The cells are first clustered based on FSC-A and SSC-W to distinguish between budded (teal and red clusters), and unbudded (green and blue clusters) ones. Each cluster can then be further divided based on mCherry level, with unbudded cells from RMxBY-GFP cross (green cluster) and unbudded cells from BYxBY-GFP cross (blue cluster) retained for analysis. Black points correspond to cells that were not confidently assigned to one of the four main clusters.

Supplementary Figure 2. Protein level measurements are reproducible between biological replicates of cytometry experiments. **a**. Comparison of average protein levels in two biological replicates of the BYxBY cross. Each *ORF-GFP* strain corresponds to one marker, with strains that are flagged as not reproducible (due to large discrepancies between biological replicates in mean or variance in BYxBY or RMxBY cross) marked in red. **b**. Same as **a**, but for variance measurements. **c**. Same as **a**. but for BYxBY and RMxBY differences, combining all plates, discarding non-reproducible measurements, and limiting the changes to at most 0.3 in absolute value. **d**. Same as **a**., but for average mRNA level measurements.

Supplementary Figure 3. Protein levels and variances are similar for the BYxBY and RMxBY crosses. The differences are small compared to cell-to-cell variation, but large compared to differences between biological replicates. **a**. log10-scale standard deviation in GFP level (calculated from linear measurements, x-axis) is larger than the log10-scale magnitude of the difference between inbred and outbred progeny (y-axis) for vast majority of genes. **b**. log10-scale magnitude of the difference between inbred and outbred (y-axis) is of comparable size to between-experiment variation (x-axis). **c**. log10-scale variance in GFP level (calculated from linear measurements) is similar for inbred BYxBY population (x-axis) and outbred RMxBY segregants (y-axis). **d**. Distribution of heritability of linear (not transformed) GFP measurements in single cells. **e**. Distribution of heritability of log10- transformed GFP measurements in single cells. **f**. Distribution of heritability of linear (not transformed) population average GFP measurement. **g**. Distribution of heritability of log10-transformed population average GFP measurement. **h**-**k.** Same as **d**-**g**, but using an empirical Bayesian prior for GFP level variance, which pushes the variance estimates towards the average across all ORFs (Methods).

Supplementary Figure 4. Protein level measurements from different assays are similar, but TAP measurements from a previous study ([Ghaemmaghami et al. 2003](#_ENREF_20)) and mRNA levels from this study are discordant. **a**. Comparison of cytometry measurements from this study (x-axis), and TAP data from Ghaemmaghami et al.([Ghaemmaghami et al. 2003](#_ENREF_20)) (y-axis). **b**. Comparison of cytometry measurements (x-axis) and microscopy measurements (y-axis) from this study. **c**. Comparison of cytometry measurements (x-axis) and Tecan solid plate reader measurements (y-axis) from this study. **d**. Comparison of cytometry measurements (x-axis) and mRNA-seq measurements (y-axis) from this study. **e**. Comparison of protein abundance changes in this study, as determined from cytometry data (x-axis), and mRNA level changes in this study from mRNA-seq (y-axis), averaged across biological replicates. **f**. Comparison of absolute *cis* (x-axis) and *trans* (y-axis) effect sizes for the 52 ORFs with GFP fusions in the RM background (Supplementary Table 5, Methods).

Supplementary Figure 5. Decomposition of the GFP level phenotype variation into private, familial, and genetic components. The total variance in the imaged cell population is scaled to 1, and decomposed into mother-daughter variance, additional variance between different clonal individuals, and additional variance between different segregants. Every marker in the plot corresponds to one *ORF-GFP* fusion, and its distances to the sides of the triangle sum to 1, the total rescaled variance. The distance to one side equals the fraction of the total variance that is due to the component designated at the opposing vertex, such that strains with a large contribution from that component will lie close to the vertex.

Supplementary Figure 6. Stability of sorted GFP levels over long term passaging. The log10-scale fluorescence readout (x-axis) for the GFP low (in the bottom 5-10% of the sorted population, dark green), and GFP very high (95-100%, bright green) populations of the Hxt2-GFP (upper panel) and Pdr5-GFP (lower panel) fusion proteins after overnight propagation of the sorted populations..

Supplementary Figure 7. Reproducibility of pQTL signals. **a**. Comparison of microarrays and sequencing to determine the RM allele frequency in a pool of segregants. For one sorted population (*YAL044C-GFP* sorted for very high GFP), RM allele frequency for chromosome II is plotted for sequencing data (blue), and log-scale RM to BY probe signal for array data (green). See Fig. 2B for an in-depth description of the lines and markers. **b**. Comparison of technical replicates of allele frequency measurement. Two populations (*YAL044C-GFP* sorted for very high GFP in blue and high GFP in green) from the same sorting experiment have nearly identical RM allele frequencies. See Fig. 2B for an in-depth description of the lines and markers. **c**. Comparison of biological replicates of allele frequency measurement. Two biological replicates of the *YAL044C-GFP* sorted for very high GFP have similar RM allele frequencies, and are both selected for the auxotrophic marker at the *HTA2* locus. See Fig. 2B for an in-depth description of the lines and markers. **d**. Comparison of pQTL signal (RM allele frequency in GFP very high pool – RM allele frequency in GFP low pool) in the discovery sample (x-axis) and replication sample (y-axis). Each marker corresponds to one pQTL with at least 15% allele frequency difference; some pQTLs from Supplementary Table 7 are not represented due to a lack of biological replicate. Using a replication signal cutoff of 10% in the same direction, the density of replicated pQTLs (blue) increases with the magnitude of the pQTL signal, with most of the unreplicated pQTLs (red) having low magnitude effects. **e**. Number of found pQTLs in the discovery samples (y-axis) depending on the pQTL signal cutoff (x-axis). Cutoff of 0.2 used for most of the paper is marked with the red dashed line. **f**. Reproducibility and replication signal depending on the magnitude of the pQTL signal (x-axis). Fraction of pQTLs with effect size above a cutoff (y-axis) that have the same sign of effect size, and magnitude at least 0.1 (green), or 0.05 (blue) in the replication samples is plotted against a range of pQTL signal cutoffs (x-axis). The expected fraction of true positives (1 – false discovery rate, red, Supplementary Methods) is plotted for the same cutoffs.

Supplementary Figure 8. Locus effects on protein and mRNA levels. Marginal effect size of the locus genotype on segregant mRNA expression level from a multivariate regression model using data from ([Smith and Kruglyak 2008](#_ENREF_43)) (y-axis) contrasted with pQTL differences in the locus RM allele frequency between sorted GFP high and GFP low populations (x-axis). pQTLs with effect size below 0.2 are displayed in blue, the rest in red. The bright red markers correspond to the three posttranscriptional pQTLs discussed in the main text. Pearson’s r and Spearman’s rho correlation coefficients for red (left) and all markers (right) are given in the x-axis label.

Supplementary Figure 9. Changes in protein level and mRNA level in BYxBY, BYregulator-RMxBY and RMxBY crosses. Genes whose mRNA level was linked to *HAP1* (column 1), *MKT1* (column 2), or *IRA2* (column 3) in a previous study of the BYxRM cross are displayed in red, the rest in blue. Correlation of measurements for genes affected by each regulator is shown (Spearman’s rho). We contrast mRNA signal from this study (log10 mean coverage in BYxRM cross – log10 mean coverage in BYxBY cross, Supplementary Table 8), mRNA signal from ([Smith and Kruglyak 2008](#_ENREF_43)) (multivariate regression weight of the locus allele on segregant mRNA levels), total cytometry signal from this study (log10 average linear GFP level in middle 10% FSC-A of BYxRM cross – log10 average linear GFP level in middle 10% FSC-A of BYxBY cross, Supplementary Table 2), and allele signal from this study from Tecan plate reader measurements (log-scale BYregulator-RMxBY – log-scale BYxBY colony fluorescence signal, Supplementary Table 8.). Tecan measurements of *IRA2* and *MKT1* regulator effects reflect the combined influence of the two alleles.

Supplementary Table 1. Strains used in this study. The strain ID (in the Boone / Andrews lab collection), genotype, genetic background, and mating type for strains used in this study.

Supplementary Table 2. Haploid collection protein level measurements from cytometry and microscopy data, and mRNA sequencing. For raw cytometry data, we give GFP level statistics for the entire measured cell population, and the middle 10% of the population according to cell size (median +-5%, Methods) for each measured *ORF-GFP* strain, both BYxBY and RMxBY crosses, and each biological replicate. We present the average, median, and variance of the raw measurements, as well as log10transformed ones, and also give the number of cells used for calculating the statistics, and whether we deemed the strain measurements reproducible across replicates. Image data includes cell counts, mean and median log10 scale measurements, and different types of variance estimates (Methods) for the BYxBY and RMxBY crosses. For combined cytometry data, we give strain-level summaries of the statistics, standard errors for biological replicates, and heritability estimates. For microscopy data, we give the average log10 scale GFP fluorescence across cells, number of cells, and the estimated variances for different classes of cell pairs (see Methods section on estimating variance components from microscopy images), and the number of cell pairs the estimates are based on. For mRNA-seq based gene expression measurements, for each ORF we give the average read coverage across all overlapping bases in the two biological replicates of BYxBY inbred, and RMxBY outbred populations.

Supplementary Table 3. Gene Ontology enrichments of genes enriched in the sorted lists of largest increase and decrease if GFP level, mRNA level in the RMxBY cross compared to BYxBY, and genes changing in GFP level, but not affected by the three main regulators.

Supplementary Table 4. Heritability estimates. For each ORF, we give the different heritability estimates (single cell GFP levels or population average measurement; no transform or log10-transform; no prior or empirical Bayes prior), and summary statistics across biological replicates that were used in the calculations (Supplementary Methods, Supplementary Fig. 3d-k).

Supplementary Table 5. Protein level measurements from crosses with the reciprocal set (GFP in the RM background). For the 52 ORFs for which we measured their levels in BYxBY, RMxBY, BYxRM and RMxRM crosses, we give the log10-scale average measurements in the two replicate populations, and estimates of *cis* effect size (average |RMxBY – BYxRM| measurement), total effect size (average |RMxRM – BYxBY| measurement), and *trans* effect size (|total – *cis*|).

Supplementary Table 6. Microarray and sequencing metadata. For each sorted population, its sample ID, ORF, population type (GFP high or low), assay type (microarrays or sequencing), QTL discovery set name, comments, and sequencing coverage (if applicable) are given.

Supplementary Table 7. Called pQTLs. For each discovery set pQTL, we give the ORF-GFP fusion for which it was mapped, locus chromosome, peak of largest allele frequency difference, start of entire selected region (at least 0.1 signal), start of peak region (at most 0.04 from peak signal strength), end of peak region, end of selected region, length of selected region, pQTL signal, standard deviation of the signal, number of standard deviations the signal is different from 0, average pQTL signal in replication sets, average number of standard deviations the replication signal is different from 0, average fraction of sites in replication set that have at least this magnitude of pQTL signal, list of candidate genes in the peak region sorted by the distance to the peak locus.

Supplementary Table 8. Population average GFP levels in two replicates of *HAP1*, *IRA2* and *MKT1* allele replacement strain crosses assayed from colonies on solid plate (Methods).

Supplementary Dataset 1. Microarray and sequencing data (probe intensities/locus allele counts, posterior signal after averaging; average ORF coverage for RNAseq). Each file corresponds to one sequenced population, and each row corresponds to one assayed segregating site in that population. We give the chromosome and location of the site, number of sequencing reads observed, number of BY alleles observed, number of RM alleles observed, maximum likelihood estimate of RM allele frequency and its standard deviation, estimated posterior mean RM allele frequency and its standard deviation, and whether we consider the site to be bad.

Supplementary Dataset 2. SIFT scores for coding variants segregating between BY and RM strains. Each row corresponds to one segregating site; we give its chromosome, location, overlapping ORF and its common name, type of mutation (Syn for synonymous, NonSyn for nonsynonymous, Stop-gain for gain of stop codon), amino acid change, SIFT call (TOLERATED vs DELETERIOUS) and SIFT score.

Supplementary Dataset 3. CellProfiler pipeline used for microscopy image processing.
