# Supplementary material for: Heritability and genetic basis of protein level variation in an outbred population
Source: HighWire-hosted journal article supplement (doi:10.1101/gr.170506.113), 2014-05-13
Supplement: Supplemental_Table_S1.xlsx [file Supplemental_Table_S1.xlsx]

## Sheet: Sheet1
Strain ID	Genotype	Background	Mating type	Notes
Y14017	can1^::STE2pr-LEU2 HTA2-mCherry-URA3 his3^1::ClonNAT leu2^0 ura3^0 met15^0 ho::HygMX AMN1(BY) LYP1	RM11	@	RM query for crossing to GFP collection.
Y14053	can1^::STE2pr-LEU2 HTA2-mCherry-URA3 his3^1::ClonNAT leu2^0 ura3^0 ho::HygMX LYP1	S288c	@	BY query for crossing to GFP collection.
Y14101	can1^::STE2pr-LEU2 HTA2-mCherry-URA3 his3^1::ClonNAT leu2^0 ura3^0 ho::HygMX LYP1 HAP1(RM)	S288c	@	Query for crossing to GFP collection with HAP1 allele switched to RM11 wild type (no TY insertion in 3' end).
Y14193	can1^::Ste2pr-LEU2 HTA2-mCherry-URA3 his3^1 leu2^0 ura3^0 IRA2(RM11-a)	S288c	@	Query for crossing to GFP collection; IRA2 allele from RM11-a strain.
Y14194	can1^::Ste2pr-LEU2 HTA2-mCherry-URA3 his3^1 leu2^0 ura3^0 IRA2(BY) ho::Cre AMN1(BY)	RM11	@	Query for crossing to GFP collection; IRA2 and AMN1 alleles from BY strain.
Y14196	can1^::Ste2pr-LEU2 HTA2-mCherry-URA3 his3^1 leu2^0 ura3^0 MKT1(RM11-a)	S288c	@	Query for crossing to GFP collection; MKT1 allele from RM11-a strain.
Y14197	can1^::Ste2pr-LEU2 HTA2-mCherry-URA3 his3^1 leu2^0 ura3^0 MKT1(BY) ho::Cre AMN1(BY)	RM11	@	Query for crossing to GFP collection; MKT1 and AMN1 alleles from BY strain.
Y14217	his3^1 leu2^0 ura3^0 can1^::STE2pr-LEU2 HTA2-mCherry(RM)-URA3 AMN1(BY) IRA2(BY) MKT1(BY)	RM11	@	RM query strain with AMN1, IRA2, MKT1 alleles from BY version
Y14218	his3^1 leu2^0 ura3^0 can1^::STE2pr-LEU2 HTA2-mCherry-URA3 IRA2(RM) MKT1(RM)	S288c	@	BY query strain with IRA2 and MKT1 alleles from RM strain.
Y14219	his3^1::ClonNat leu2^0 ho^::HygMX ura3^0 can1^::STE2pr-LEU2 HTA2-mCherry-URA3 IRA2(RM) MKT1(RM) HAP1(RM)	S288c	@	BY query strain with HAP1, IRA2 and MKT1 alleles from RM strain
Y14260	can1^::STE2pr-LEU2 HTA2-mCherry-URA3 his3^1::ClonNAT leu2^0 ura3^0 met15^0 ho::HygMX AMN1-BY LYP1 rgt2^::KanMX	RM11	@	Query for crossing to GFP collection. From a cross between ACY811 from Amy Caudy and Y13827. RGT2 gene deleted with Kan selection cassette replacement from deletion collection. Phenotype and PCR confirmed.
Y14262	his3^1 leu2^0 ura3^0 lys2^0 rgt2^::KanMX HXT2-GFP-His3MX6	S288c	a	GFP array strain HXT2 transformed with KanMX deletion construct for RGT2. Copy 1.
Y14264	his3^1 leu2^0 ura3^0 lys2^0 pdr1^::KanMX PDR5-GFP-His3MX6	S288c	a	GFP array strain PDR5 transformed with KanMX deletion construct for PDR1. Copy 1.
Y14266	can1^::STE2pr-LEU2 HTA2-mCherry-URA3 his3^1::ClonNAT leu2^0 ura3^0 met15^0 ho::HygMX AMN1-BY LYP1 pdr1^::KanMX	RM11	@	Query for crossing to GFP collection. From a cross between ACY811 from Amy Caudy and Y13827. PDR1 gene deleted with Kan selection cassette replacement from deletion collection. Phenotype and PCR confirmed.
Various	leu2^0 his3^1 ura3^0 lys2^0 YFG-GFP-His3MX6	RM11	a	GFP array strains with the fluorescent marker of your-favourite-gene (YFG) in the RM background.
