# Supplementary material for: Heritability and genetic basis of protein level variation in an outbred population
Source: HighWire-hosted journal article supplement (doi:10.1101/gr.170506.113), 2014-05-13
Supplement: Supplemental_Table_S2.xlsx [file Supplemental_Table_S2.xlsx]

## Sheet: Cytometry GFP in single screens
Experiment	Screen	Plate	Well	Orf	Query	Ploidy	Flag	GFP_slice_mean	GFP_slice_median	GFP_slice_var	GFP_slice_linearmean	GFP_slice_linearmedian	GFP_slice_linearvar	GFP_slice_count	GFP_all_mean	GFP_all_median	GFP_all_var	GFP_all_linearmean	GFP_all_linearmedian	GFP_all_linearvar	GFP_all_count
Pilot_screen_BYxRM	haploid-R2	P1	F7,F8	YAL001C	BY	Haploid	OK	3.032	3.049	0.031	3.066	3.0489	5.5189	1053	3.069	3.073	0.0474	3.1231	3.0729	5.7941	10466
Pilot_screen_BYxRM	haploid-R2	P1	F7,F8	YAL001C	RM	Haploid	OK	2.953	2.974	0.0446	3.0011	2.9742	5.5938	1732	2.967	2.989	0.0648	3.032	2.9889	5.6584	16600
Pilot_screen_BYxRM	haploid-R1	P1	E8	YAL001C	BY	Haploid	OK	2.927	2.93	0.0162	2.9488	2.9304	5.223	756	2.945	2.924	0.0412	2.9999	2.9245	5.6243	8291
Pilot_screen_BYxRM	haploid-R1	P1	E8	YAL001C	RM	Haploid	OK	2.896	2.9	0.0182	2.9203	2.8998	5.1553	655	2.917	2.914	0.0331	2.9563	2.9139	5.2709	5740
Pilot_screen_BYxRM	haploid-R2	P10	I15,I16	YAL002W	BY	Haploid	OK	2.666	2.683	0.0253	2.6944	2.683	4.5593	1068	2.693	2.69	0.0566	2.7569	2.6906	5.0508	10511
Pilot_screen_BYxRM	haploid-R2	P10	I15,I16	YAL002W	RM	Haploid	OK	2.606	2.618	0.0244	2.6326	2.6178	4.3426	1386	2.588	2.604	0.0492	2.6377	2.6044	4.6252	12471
Pilot_screen_BYxRM	haploid-R1	P10	I15	YAL002W	BY	Haploid	OK	2.966	2.961	0.0248	3.0014	2.9608	5.5285	792	3.013	2.967	0.064	3.1002	2.9672	6.0678	8608
Pilot_screen_BYxRM	haploid-R1	P10	I15	YAL002W	RM	Haploid	OK	2.908	2.909	0.021	2.9341	2.9091	5.0831	748	2.941	2.931	0.0403	2.9949	2.9315	5.7703	6658
Pilot_screen_BYxRM	fillin	Haploid-fillin_P1	A01	YAL002W	BY	Haploid	NA	3.107	3.095	0.0346	3.1504	3.0955	5.7178	454	3.06	3.023	0.0729	3.1485	3.0228	6.0162	5235
Pilot_screen_BYxRM	fillin	Haploid-fillin_P1	A01	YAL002W	RM	Haploid	NA	3.006	3.008	0.0188	3.0279	3.0085	5.0752	655	2.916	2.92	0.0391	2.9597	2.9198	5.2516	6680
Pilot_screen_BYxRM	haploid-R2	P3	G18	YAL005C	BY	Haploid	Bad-mean	5.276	5.329	0.079	5.3137	5.3291	9.4344	289	5.234	5.337	0.1648	5.3074	5.3369	9.6095	2918
Pilot_screen_BYxRM	haploid-R2	P3	G18	YAL005C	RM	Haploid	Bad-count-mean	4.921	5.133	0.469	5.1339	5.133	9.7645	224	4.938	5.186	0.5209	5.1775	5.1859	9.8498	2328
Pilot_screen_BYxRM	haploid-R1	P3	G18	YAL005C	BY	Haploid	Bad-mean	4.96	5.228	0.5031	5.1915	5.2283	9.7847	494	4.887	5.206	0.6211	5.1843	5.2065	9.9078	6167
Pilot_screen_BYxRM	haploid-R1	P3	G18	YAL005C	RM	Haploid	Bad-mean	4.933	5.087	0.3381	5.09	5.0868	9.5335	856	4.882	5.064	0.4107	5.0808	5.064	9.652	7271
Pilot_screen_BYxRM	haploid-R2	P11	M17,M18	YAL007C	BY	Haploid	OK	3.084	3.115	0.0473	3.1337	3.1149	5.6748	1897	3.063	3.084	0.0542	3.1204	3.084	5.7319	18852
Pilot_screen_BYxRM	haploid-R2	P11	M17,M18	YAL007C	RM	Haploid	OK	3.077	3.095	0.0321	3.1083	3.0955	5.3446	1288	3.062	3.086	0.0497	3.1103	3.0859	5.5528	12180
Pilot_screen_BYxRM	haploid-R1	P11	N17	YAL007C	BY	Haploid	OK	3.363	3.386	0.0294	3.3927	3.3865	5.8716	701	3.343	3.367	0.0415	3.3867	3.3668	6.0678	7176
Pilot_screen_BYxRM	haploid-R1	P11	N17	YAL007C	RM	Haploid	OK	3.377	3.392	0.0325	3.4096	3.3921	5.9334	268	3.352	3.389	0.0472	3.3983	3.3886	6.0531	2488
Pilot_screen_BYxRM	haploid-R2	P8	E15,E16	YAL008W	BY	Haploid	OK	2.611	2.622	0.0318	2.6474	2.6225	4.6444	1822	2.673	2.661	0.0701	2.7531	2.661	5.1647	18017
Pilot_screen_BYxRM	haploid-R2	P8	E15,E16	YAL008W	RM	Haploid	OK	2.545	2.571	0.0328	2.5791	2.571	4.341	1519	2.543	2.567	0.0558	2.597	2.5674	4.5622	14113
Pilot_screen_BYxRM	haploid-R1	P8	F15	YAL008W	BY	Haploid	OK	2.898	2.902	0.0225	2.9313	2.9017	5.4299	862	2.93	2.901	0.0582	3.0098	2.9009	5.903	9153
Pilot_screen_BYxRM	haploid-R1	P8	F15	YAL008W	RM	Haploid	OK	2.853	2.856	0.0239	2.8832	2.8556	5.1526	739	2.883	2.878	0.0411	2.9336	2.8777	5.4401	6751
Pilot_screen_BYxRM	haploid-R2	P7	K5,K6	YAL009W	BY	Haploid	OK	2.616	2.629	0.0219	2.6393	2.6288	4.3038	1379	2.646	2.651	0.0423	2.6922	2.6512	4.7674	13685
Pilot_screen_BYxRM	haploid-R2	P7	K5,K6	YAL009W	RM	Haploid	OK	2.581	2.623	0.0739	2.647	2.6236	4.8435	1310	2.596	2.639	0.0784	2.6692	2.6391	4.9345	12827
Pilot_screen_BYxRM	haploid-R1	P7	L5	YAL009W	BY	Haploid	OK	2.918	2.919	0.0169	2.9408	2.9192	5.2068	529	2.923	2.912	0.0341	2.9676	2.9123	5.4686	5171
Pilot_screen_BYxRM	haploid-R1	P7	L5	YAL009W	RM	Haploid	Bad-count	2.886	2.886	0.0229	2.9161	2.8858	5.233	202	2.906	2.911	0.0325	2.9499	2.9113	5.8019	2121
Pilot_screen_BYxRM	haploid-R2	P10	J17,J18	YAL010C	BY	Haploid	Bad-count-mean-var	2.883	2.867	0.0194	2.9053	2.8669	4.813	9	2.71	2.695	0.0912	2.8108	2.6951	5.3255	194
Pilot_screen_BYxRM	haploid-R2	P10	J17,J18	YAL010C	RM	Haploid	Bad-count-mean-var	2.635	2.616	0.0286	2.6747	2.6162	4.8471	52	2.661	2.684	0.039	2.7035	2.6839	4.7256	502
Pilot_screen_BYxRM	haploid-R1	P10	J18	YAL010C	BY	Haploid	Bad-count-mean-var	3.399	3.42	0.065	3.4689	3.4667	6.3725	8	3.317	3.267	0.0957	3.4377	3.2666	6.8896	97
Pilot_screen_BYxRM	haploid-R1	P10	J18	YAL010C	RM	Haploid	Bad-count-mean-var	3.32	3.253	0.1019	3.439	3.2533	6.6287	11	3.334	3.395	0.1192	3.4584	3.3948	6.623	120
Pilot_screen_BYxRM	haploid-R2	P3	I14	YAL011W	BY	Haploid	Bad-count	2.889	2.896	0.0265	2.9176	2.896	4.968	235	2.911	2.916	0.0265	2.9403	2.9165	5.0183	2343
Pilot_screen_BYxRM	haploid-R2	P3	I14	YAL011W	RM	Haploid	Bad-count	2.816	2.84	0.0369	2.8554	2.8396	4.976	117	2.857	2.867	0.0471	2.9217	2.8666	6.1072	1156
Pilot_screen_BYxRM	haploid-R1	P3	I14	YAL011W	BY	Haploid	OK	3.04	3.007	0.043	3.0984	3.0069	5.843	377	3.138	3.113	0.0785	3.2275	3.1126	6.1351	4927
Pilot_screen_BYxRM	haploid-R1	P3	I14	YAL011W	RM	Haploid	OK	2.956	2.953	0.0209	2.9834	2.9528	5.2455	713	2.966	2.953	0.0425	3.0175	2.9533	5.5311	5967
Pilot_screen_BYxRM	fillin	Haploid-fillin_P1	A02	YAL011W	BY	Haploid	NA	3.15	3.129	0.0405	3.201	3.1288	5.9024	917	3.133	3.102	0.0749	3.2233	3.1017	6.1596	9327
Pilot_screen_BYxRM	fillin	Haploid-fillin_P1	A02	YAL011W	RM	Haploid	NA	3.015	3.016	0.0188	3.0379	3.0159	5.2196	1676	2.951	2.954	0.0392	2.9955	2.9544	5.4045	15379
Pilot_screen_BYxRM	haploid-R2	P5	B24	YAL012W	BY	Haploid	OK	3.816	3.872	0.0663	3.868	3.8719	6.9119	829	3.797	3.86	0.0774	3.8617	3.8597	7.0245	8260
Pilot_screen_BYxRM	haploid-R2	P5	B24	YAL012W	RM	Haploid	OK	3.802	3.843	0.0586	3.8501	3.8434	6.8787	487	3.801	3.851	0.0642	3.8539	3.8515	6.9278	4861
Pilot_screen_BYxRM	haploid-R1	P5	B24	YAL012W	BY	Haploid	Bad-count	3.64	3.735	0.0795	3.712	3.7352	6.7861	203	3.619	3.694	0.1078	3.7191	3.6939	7.0166	2300
Pilot_screen_BYxRM	haploid-R1	P5	B24	YAL012W	RM	Haploid	OK	3.72	3.745	0.035	3.7514	3.7452	6.5275	886	3.717	3.742	0.0542	3.7674	3.7422	6.8272	8465
Pilot_screen_BYxRM	fillin	Haploid-fillin_P1	A03	YAL012W	BY	Haploid	NA	3.767	3.864	0.0943	3.8501	3.8642	7.1139	730	3.745	3.787	0.0797	3.8204	3.7873	7.1186	7150
Pilot_screen_BYxRM	fillin	Haploid-fillin_P1	A03	YAL012W	RM	Haploid	NA	3.873	3.898	0.0368	3.9061	3.8977	6.8655	1159	3.806	3.824	0.0503	3.8539	3.8245	6.9927	11020
Pilot_screen_BYxRM	haploid-R2	P8	H1,H2	YAL014C	BY	Haploid	Bad-var	2.742	2.753	0.0196	2.7643	2.753	4.5662	1786	2.784	2.77	0.057	2.8508	2.7698	5.288	17758
Pilot_screen_BYxRM	haploid-R2	P8	H1,H2	YAL014C	RM	Haploid	Bad-var	2.671	2.681	0.0229	2.6954	2.6808	4.4067	1515	2.674	2.69	0.0393	2.715	2.6899	4.7039	14436
Pilot_screen_BYxRM	haploid-R1	P8	G2	YAL014C	BY	Haploid	Bad-var	2.983	2.981	0.0186	3.0077	2.9812	5.3081	1416	3.016	2.994	0.0497	3.0825	2.9943	6.0056	14605
Pilot_screen_BYxRM	haploid-R1	P8	G2	YAL014C	RM	Haploid	Bad-var	2.947	2.945	0.0242	3.0059	2.9454	6.6757	603	2.981	2.97	0.0441	3.0495	2.97	6.5026	5513
Pilot_screen_BYxRM	haploid-R2	P5	D05	YAL015C	BY	Haploid	Bad-count	2.918	2.931	0.029	2.9475	2.9309	5.0073	173	2.937	2.946	0.0299	2.9702	2.9459	5.2281	1869
Pilot_screen_BYxRM	haploid-R2	P5	D05	YAL015C	RM	Haploid	Bad-count	2.865	2.886	0.0325	2.902	2.8862	5.0839	181	2.867	2.879	0.0395	2.98	2.8792	7.5897	1671
Pilot_screen_BYxRM	haploid-R1	P5	D5	YAL015C	BY	Haploid	OK	2.98	2.97	0.0311	3.0228	2.9696	5.5833	783	3.026	2.987	0.0685	3.114	2.9875	6.0306	9016
Pilot_screen_BYxRM	haploid-R1	P5	D5	YAL015C	RM	Haploid	OK	2.89	2.896	0.016	2.9085	2.8959	4.8037	1191	2.902	2.901	0.0369	2.9452	2.9015	5.2716	10607
Pilot_screen_BYxRM	fillin	Haploid-fillin_P1	A04	YAL015C	BY	Haploid	NA	3.116	3.094	0.0371	3.1662	3.0942	5.9038	855	3.071	3.036	0.0709	3.161	3.0361	6.0927	8858
Pilot_screen_BYxRM	fillin	Haploid-fillin_P1	A04	YAL015C	RM	Haploid	NA	3.015	3.02	0.0226	3.0429	3.0204	5.3664	1232	2.93	2.937	0.0456	2.9824	2.9366	5.4654	12843
Pilot_screen_BYxRM	haploid-R2	P3	K12	YAL016W	BY	Haploid	OK	3.644	3.654	0.0124	3.6571	3.6544	6.0406	760	3.649	3.661	0.0183	3.6663	3.6611	6.1408	7392
Pilot_screen_BYxRM	haploid-R2	P3	K12	YAL016W	RM	Haploid	Bad-count	3.537	3.582	0.0442	3.5723	3.5822	6.1212	227	3.551	3.602	0.0626	3.6022	3.6017	6.3863	2456
Pilot_screen_BYxRM	haploid-R1	P3	K12	YAL016W	BY	Haploid	OK	3.544	3.596	0.0424	3.5815	3.5956	6.2327	392	3.569	3.603	0.0669	3.6334	3.6027	6.6799	4547
Pilot_screen_BYxRM	haploid-R1	P3	K12	YAL016W	RM	Haploid	OK	3.547	3.577	0.0194	3.5654	3.5771	5.9305	449	3.512	3.536	0.0387	3.549	3.5357	6.2598	3855
Pilot_screen_BYxRM	haploid-R2	P1	H21,H22	YAL017W	BY	Haploid	OK	3.071	3.079	0.0265	3.105	3.0788	5.67	913	3.105	3.105	0.0486	3.1605	3.1051	5.8532	8911
Pilot_screen_BYxRM	haploid-R2	P1	H21,H22	YAL017W	RM	Haploid	OK	2.994	3.015	0.0296	3.0248	3.0153	5.2109	726	3.011	3.027	0.0448	3.0578	3.0272	5.4588	6985
Pilot_screen_BYxRM	haploid-R1	P1	G22	YAL017W	BY	Haploid	OK	3.041	3.009	0.0404	3.1115	3.0095	6.1858	595	3.068	3.017	0.0655	3.1648	3.0168	6.3286	7012
Pilot_screen_BYxRM	haploid-R1	P1	G22	YAL017W	RM	Haploid	OK	2.965	2.946	0.04	3.0433	2.9461	6.2753	904	2.992	2.964	0.0615	3.1067	2.9644	6.5421	7917
Pilot_screen_BYxRM	haploid-R2	P1	G23,G24	YAL019W	BY	Haploid	OK	3.202	3.212	0.0164	3.2202	3.2122	5.4026	1311	3.218	3.219	0.0285	3.2511	3.2189	5.7768	13035
Pilot_screen_BYxRM	haploid-R2	P1	G23,G24	YAL019W	RM	Haploid	OK	3.139	3.155	0.023	3.1645	3.1554	5.393	1196	3.139	3.152	0.0361	3.1764	3.1523	5.5796	11210
Pilot_screen_BYxRM	haploid-R1	P1	H23	YAL019W	BY	Haploid	OK	3.095	3.101	0.0171	3.1142	3.1011	5.245	790	3.12	3.107	0.0352	3.1649	3.1075	5.8051	8308
Pilot_screen_BYxRM	haploid-R1	P1	H23	YAL019W	RM	Haploid	OK	3.069	3.074	0.013	3.084	3.074	5.0265	800	3.068	3.072	0.0244	3.0967	3.0722	5.3768	7538
Pilot_screen_BYxRM	haploid-R2	P11	B17,B18	YAL021C	BY	Haploid	OK	3.004	3.032	0.0253	3.0293	3.0316	5.0508	2577	3.007	3.016	0.0429	3.0524	3.0163	5.4108	25487
Pilot_screen_BYxRM	haploid-R2	P11	B17,B18	YAL021C	RM	Haploid	OK	2.995	3.008	0.0174	3.012	3.0076	4.8344	2276	2.989	3	0.036	3.0269	2.9997	5.2758	21771
Pilot_screen_BYxRM	haploid-R1	P11	B18	YAL021C	BY	Haploid	OK	3.25	3.25	0.0126	3.2646	3.2502	5.3815	1280	3.247	3.237	0.03	3.2833	3.237	5.8742	14064
Pilot_screen_BYxRM	haploid-R1	P11	B18	YAL021C	RM	Haploid	OK	3.205	3.21	0.0116	3.2185	3.2096	5.2577	1312	3.231	3.226	0.0261	3.2606	3.2265	5.7018	11636
Pilot_screen_BYxRM	fillin	Haploid-fillin_P1	A05	YAL021C	BY	Haploid	NA	3.346	3.361	0.0313	3.379	3.3606	5.9364	986	3.315	3.306	0.0442	3.3648	3.306	6.1427	10332
Pilot_screen_BYxRM	fillin	Haploid-fillin_P1	A05	YAL021C	RM	Haploid	NA	3.328	3.331	0.0162	3.3453	3.3309	5.5624	1679	3.279	3.283	0.0311	3.3131	3.2828	5.8213	14007
Pilot_screen_BYxRM	haploid-R2	P10	B13,B14	YAL023C	BY	Haploid	OK	2.751	2.768	0.0205	2.7731	2.7678	4.5248	293	2.779	2.776	0.0554	2.8414	2.7763	5.1956	2981
Pilot_screen_BYxRM	haploid-R2	P10	B13,B14	YAL023C	RM	Haploid	OK	2.704	2.715	0.0213	2.7269	2.7149	4.4318	1484	2.694	2.71	0.0382	2.7333	2.7105	4.6938	14238
Pilot_screen_BYxRM	haploid-R1	P10	A14	YAL023C	BY	Haploid	OK	3.016	3.015	0.0186	3.0404	3.0151	5.3485	1155	3.034	3.018	0.0352	3.0797	3.0176	5.6708	11812
Pilot_screen_BYxRM	haploid-R1	P10	A14	YAL023C	RM	Haploid	OK	2.99	2.988	0.0151	3.0077	2.9884	4.9986	559	3.014	3.013	0.0303	3.0489	3.0134	5.3888	5275
Pilot_screen_BYxRM	haploid-R2	P1	I3,I4	YAL024C	BY	Haploid	OK	3.051	3.063	0.0212	3.0751	3.0628	5.2114	959	3.092	3.081	0.0452	3.1466	3.0813	5.8399	9675
Pilot_screen_BYxRM	haploid-R2	P1	I3,I4	YAL024C	RM	Haploid	OK	3.002	3.022	0.0354	3.0394	3.0216	5.3183	1268	3.022	3.04	0.047	3.0701	3.0402	5.4826	12220
Pilot_screen_BYxRM	haploid-R1	P1	I3	YAL024C	BY	Haploid	OK	2.936	2.939	0.0166	2.9572	2.9389	5.1139	697	2.989	2.958	0.0488	3.0551	2.9577	5.9029	7196
Pilot_screen_BYxRM	haploid-R1	P1	I3	YAL024C	RM	Haploid	OK	2.908	2.912	0.0181	2.9296	2.9123	4.909	525	2.922	2.921	0.0326	2.9632	2.9214	5.5258	4985
Pilot_screen_BYxRM	haploid-R2	P10	E19,E20	YAL026C	BY	Haploid	OK	2.947	2.97	0.0304	2.9792	2.9701	5.1109	1195	2.956	2.964	0.0588	3.02	2.9642	5.5806	12084
Pilot_screen_BYxRM	haploid-R2	P10	E19,E20	YAL026C	RM	Haploid	OK	2.87	2.886	0.0242	2.8981	2.8863	5.1402	1935	2.871	2.887	0.0353	2.9091	2.8869	5.2269	18308
Pilot_screen_BYxRM	haploid-R1	P10	E19	YAL026C	BY	Haploid	OK	3.136	3.144	0.0188	3.1591	3.1436	5.4936	1307	3.16	3.141	0.0447	3.2156	3.1411	6.0052	13773
Pilot_screen_BYxRM	haploid-R1	P10	E19	YAL026C	RM	Haploid	OK	3.098	3.102	0.0123	3.1119	3.1021	5.033	742	3.119	3.119	0.0289	3.1534	3.1193	5.6109	6476
Pilot_screen_BYxRM	fillin	Haploid-fillin_P1	A06	YAL026C	BY	Haploid	NA	3.28	3.287	0.0265	3.3109	3.2865	5.8176	915	3.273	3.26	0.05	3.3316	3.2596	6.1804	8977
Pilot_screen_BYxRM	fillin	Haploid-fillin_P1	A06	YAL026C	RM	Haploid	NA	3.192	3.194	0.0164	3.2102	3.194	5.3558	1560	3.134	3.142	0.0315	3.1694	3.1416	5.5655	13867
Pilot_screen_BYxRM	haploid-R2	P7	G10,G9	YAL027W	BY	Haploid	OK	2.618	2.635	0.0192	2.6386	2.635	4.2477	1242	2.63	2.642	0.0332	2.6698	2.6422	5.2133	12233
Pilot_screen_BYxRM	haploid-R2	P7	G10,G9	YAL027W	RM	Haploid	OK	2.651	2.693	0.0667	2.7117	2.6936	4.774	1307	2.655	2.709	0.0834	2.7288	2.7094	5.0842	12573
Pilot_screen_BYxRM	haploid-R1	P7	H9	YAL027W	BY	Haploid	Bad-count	2.96	2.934	0.0267	3.0009	2.9343	5.6984	175	2.997	2.965	0.0485	3.0622	2.9648	5.834	1783
Pilot_screen_BYxRM	haploid-R1	P7	H9	YAL027W	RM	Haploid	Bad-count	2.924	2.921	0.0226	2.9516	2.9211	5.0777	60	2.951	2.949	0.0418	3.0005	2.9491	5.4878	556
Pilot_screen_BYxRM	fillin	Haploid-fillin_P1	A07	YAL027W	BY	Haploid	NA	3.079	3.067	0.0341	3.1229	3.0675	5.7011	935	3.036	2.999	0.076	3.1319	2.9987	6.0637	11029
Pilot_screen_BYxRM	fillin	Haploid-fillin_P1	A07	YAL027W	RM	Haploid	NA	2.973	2.975	0.0197	2.9957	2.975	5.0465	1448	2.902	2.908	0.0406	2.9477	2.9077	5.2562	13481
Pilot_screen_BYxRM	haploid-R2	P1	M5,M6	YAL029C	BY	Haploid	OK	3.202	3.212	0.0127	3.2164	3.2116	5.245	1046	3.211	3.214	0.0277	3.2431	3.2136	5.7336	10376
Pilot_screen_BYxRM	haploid-R2	P1	M5,M6	YAL029C	RM	Haploid	OK	3.166	3.166	0.0209	3.1898	3.1659	5.4378	1008	3.179	3.187	0.031	3.2129	3.1868	5.6726	9690
Pilot_screen_BYxRM	haploid-R1	P1	M5	YAL029C	BY	Haploid	OK	3.095	3.095	0.0158	3.1205	3.0946	5.885	629	3.09	3.079	0.0289	3.1269	3.0788	5.6971	6703
Pilot_screen_BYxRM	haploid-R1	P1	M5	YAL029C	RM	Haploid	OK	3.059	3.064	0.0104	3.0709	3.0639	4.8806	703	3.067	3.07	0.0214	3.0925	3.0699	5.4109	6588
Pilot_screen_BYxRM	haploid-R2	P2	I13,I14	YAL031C	BY	Haploid	OK	3.133	3.128	0.0298	3.1703	3.1276	5.7739	1447	3.199	3.162	0.0682	3.2817	3.1621	6.2562	14480
Pilot_screen_BYxRM	haploid-R2	P2	I13,I14	YAL031C	RM	Haploid	OK	3.042	3.058	0.0252	3.0693	3.0578	5.2292	1183	3.045	3.06	0.0425	3.0886	3.0597	5.4657	11170
Pilot_screen_BYxRM	haploid-R1	P2	J13	YAL031C	BY	Haploid	OK	3.116	3.091	0.0368	3.1721	3.0914	6.1041	418	3.171	3.124	0.0672	3.2577	3.1236	6.5139	5208
Pilot_screen_BYxRM	haploid-R1	P2	J13	YAL031C	RM	Haploid	OK	3.026	3.028	0.0153	3.0453	3.0276	5.1723	624	3.031	3.027	0.0289	3.065	3.0272	5.3967	5192
Pilot_screen_BYxRM	haploid-R2	P5	J02	YAL032C	BY	Haploid	OK	3.024	3.029	0.017	3.0424	3.0287	5.0056	443	3.029	3.039	0.0229	3.0661	3.039	6.7421	4295
Pilot_screen_BYxRM	haploid-R2	P5	J02	YAL032C	RM	Haploid	OK	2.97	2.987	0.025	2.9975	2.9871	5.1021	364	2.988	2.999	0.0288	3.0328	2.9987	6.4113	3667
Pilot_screen_BYxRM	haploid-R1	P5	J2	YAL032C	BY	Haploid	OK	3.035	3.02	0.0268	3.0765	3.0199	5.8452	668	3.089	3.038	0.0639	3.1822	3.0378	6.9887	7523
Pilot_screen_BYxRM	haploid-R1	P5	J2	YAL032C	RM	Haploid	OK	2.957	2.966	0.0157	2.975	2.9658	4.8987	859	2.972	2.969	0.0334	3.0199	2.9691	6.3746	7535
Pilot_screen_BYxRM	fillin	Haploid-fillin_P1	A08	YAL032C	BY	Haploid	NA	3.179	3.164	0.0338	3.2239	3.1639	5.9658	863	3.172	3.143	0.0635	3.2491	3.1425	6.1578	9146
Pilot_screen_BYxRM	fillin	Haploid-fillin_P1	A08	YAL032C	RM	Haploid	NA	3.093	3.098	0.0158	3.111	3.0982	5.1706	1482	3.018	3.019	0.0327	3.0547	3.0193	5.369	14462
Pilot_screen_BYxRM	haploid-R2	P8	P5,P6	YAL033W	BY	Haploid	OK	3.025	3.07	0.0334	3.0558	3.0704	5.1123	1489	3.016	3.054	0.0654	3.0795	3.0543	5.5798	14630
Pilot_screen_BYxRM	haploid-R2	P8	P5,P6	YAL033W	RM	Haploid	OK	3.023	3.057	0.0333	3.0522	3.0575	5.0674	1139	3.002	3.041	0.0525	3.0512	3.0408	5.3786	10466
Pilot_screen_BYxRM	haploid-R1	P8	P6	YAL033W	BY	Haploid	OK	3.244	3.252	0.0221	3.2743	3.2518	6.0535	1008	3.257	3.249	0.0445	3.3161	3.2491	6.36	10034
Pilot_screen_BYxRM	haploid-R1	P8	P6	YAL033W	RM	Haploid	OK	3.239	3.245	0.0178	3.2579	3.2454	5.4833	477	3.23	3.243	0.038	3.2772	3.2434	6.2472	4669
Pilot_screen_BYxRM	haploid-R2	P7	J19,J20	YAL034W-A	BY	Haploid	Bad-var	2.613	2.63	0.0291	2.644	2.6298	4.4458	1531	2.635	2.648	0.0499	2.6904	2.6482	4.9644	15168
Pilot_screen_BYxRM	haploid-R2	P7	J19,J20	YAL034W-A	RM	Haploid	Bad-var	2.545	2.565	0.0329	2.5812	2.565	4.3904	883	2.536	2.559	0.0575	2.5936	2.5589	4.5885	8477
Pilot_screen_BYxRM	haploid-R1	P7	I20	YAL034W-A	BY	Haploid	Bad-var	2.933	2.918	0.0293	2.9767	2.9184	5.5921	374	2.96	2.94	0.0525	3.0267	2.9399	5.7248	4179
Pilot_screen_BYxRM	haploid-R1	P7	I20	YAL034W-A	RM	Haploid	Bad-count-var	2.918	2.892	0.0399	2.9846	2.892	5.9414	191	2.881	2.872	0.0446	2.9369	2.8724	5.4993	1467
Pilot_screen_BYxRM	fillin	Haploid-fillin_P1	A09	YAL034W-A	BY	Haploid	NA	3.116	3.089	0.0317	3.1568	3.0891	5.7445	812	3.097	3.073	0.0711	3.1832	3.0728	6.077	8559
Pilot_screen_BYxRM	fillin	Haploid-fillin_P1	A09	YAL034W-A	RM	Haploid	NA	3.016	3.013	0.0228	3.0424	3.0135	5.2098	544	2.932	2.936	0.0431	2.9811	2.9356	5.3768	5918
Pilot_screen_BYxRM	haploid-R2	P1	F19,F20	YAL035W	BY	Haploid	OK	3.976	3.997	0.0372	4.0044	3.9967	6.9253	1603	3.979	3.997	0.0523	4.0235	3.9972	7.2632	15938
Pilot_screen_BYxRM	haploid-R2	P1	F19,F20	YAL035W	RM	Haploid	OK	3.944	3.981	0.0468	3.9813	3.9814	6.9937	1360	3.95	3.978	0.0644	4.0052	3.9777	7.3084	13323
Pilot_screen_BYxRM	haploid-R1	P1	F20	YAL035W	BY	Haploid	OK	3.848	3.887	0.0458	3.8834	3.8871	6.753	747	3.84	3.868	0.0567	3.8911	3.8675	7.0667	8185
Pilot_screen_BYxRM	haploid-R1	P1	F20	YAL035W	RM	Haploid	OK	3.854	3.869	0.0271	3.877	3.8689	6.6372	1083	3.857	3.876	0.0497	3.9027	3.8759	7.0693	9996
Pilot_screen_BYxRM	haploid-R2	P6	M13	YAL036C	BY	Haploid	OK	3.568	3.618	0.0394	3.6032	3.6177	6.2405	490	3.535	3.584	0.048	3.584	3.5837	7.1411	5800
Pilot_screen_BYxRM	haploid-R2	P6	M13	YAL036C	RM	Haploid	OK	3.541	3.587	0.0447	3.5832	3.5867	6.5819	896	3.551	3.592	0.0479	3.594	3.5917	6.4166	7965
Pilot_screen_BYxRM	haploid-R1	P6	M13	YAL036C	BY	Haploid	OK	3.427	3.455	0.0244	3.4497	3.4554	5.7838	924	3.413	3.44	0.0351	3.4476	3.4395	6.0406	9063
Pilot_screen_BYxRM	haploid-R1	P6	M13	YAL036C	RM	Haploid	OK	3.44	3.465	0.0224	3.4619	3.4655	5.8148	492	3.439	3.466	0.0355	3.4743	3.4661	6.0867	5083
Pilot_screen_BYxRM	haploid-R2	P4	C02	YAL038W	BY	Haploid	OK	4.772	4.819	0.0842	4.818	4.8191	8.5858	640	4.756	4.811	0.1038	4.8135	4.8115	8.69	6593
Pilot_screen_BYxRM	haploid-R2	P4	C02	YAL038W	RM	Haploid	OK	4.583	4.711	0.2439	4.7028	4.7115	8.6399	473	4.565	4.725	0.2976	4.7143	4.7254	8.7597	4386
Pilot_screen_BYxRM	haploid-R1	P4	C2	YAL038W	BY	Haploid	OK	4.568	4.675	0.1972	4.6784	4.6754	8.6603	289	4.513	4.69	0.3376	4.7114	4.6905	9.0282	3476
Pilot_screen_BYxRM	haploid-R1	P4	C2	YAL038W	RM	Haploid	OK	4.54	4.6	0.1047	4.5995	4.6003	8.243	639	4.513	4.588	0.1625	4.6126	4.588	8.6026	5806
Pilot_screen_BYxRM	haploid-R2	P11	D7,D8	YAL039C	BY	Haploid	OK	2.759	2.777	0.021	2.781	2.7771	4.5357	1457	2.791	2.789	0.0431	2.8385	2.7889	5.0596	14564
Pilot_screen_BYxRM	haploid-R2	P11	D7,D8	YAL039C	RM	Haploid	OK	2.713	2.724	0.0238	2.7381	2.7239	4.573	1834	2.713	2.725	0.0428	2.759	2.7256	4.8856	17954
Pilot_screen_BYxRM	haploid-R1	P11	C8	YAL039C	BY	Haploid	OK	3.051	3.053	0.0162	3.0737	3.0531	5.4415	641	3.071	3.049	0.0377	3.1211	3.0491	5.8185	6542
Pilot_screen_BYxRM	haploid-R1	P11	C8	YAL039C	RM	Haploid	OK	2.992	2.995	0.0155	3.0111	2.9949	5.0508	618	3.008	3.008	0.033	3.0476	3.0083	5.5678	6006
Pilot_screen_BYxRM	haploid-R2	P2	I3,I4	YAL041W	BY	Haploid	OK	3.176	3.185	0.0289	3.2096	3.1852	5.7007	1002	3.254	3.221	0.0622	3.3267	3.2213	6.2672	10628
Pilot_screen_BYxRM	haploid-R2	P2	I3,I4	YAL041W	RM	Haploid	OK	3.124	3.136	0.0203	3.1458	3.136	5.2905	1484	3.127	3.134	0.0349	3.1645	3.1337	5.6347	13506
Pilot_screen_BYxRM	haploid-R1	P2	I3	YAL041W	BY	Haploid	OK	3.155	3.141	0.0279	3.1916	3.1408	5.7979	322	3.228	3.186	0.0621	3.3025	3.1862	6.2538	4543
Pilot_screen_BYxRM	haploid-R1	P2	I3	YAL041W	RM	Haploid	OK	3.103	3.107	0.011	3.1152	3.1071	4.9647	956	3.102	3.104	0.0247	3.13	3.1037	5.4205	8193
Pilot_screen_BYxRM	haploid-R2	P2	K23,K24	YAL043C	BY	Haploid	Bad-var	3.396	3.371	0.0828	3.5301	3.3708	7.6135	1109	3.457	3.487	0.1042	3.602	3.4866	7.6993	11166
Pilot_screen_BYxRM	haploid-R2	P2	K23,K24	YAL043C	RM	Haploid	Bad-var	3.123	3.123	0.0315	3.2212	3.1229	7.3028	1066	3.123	3.129	0.0408	3.2038	3.1295	7.1392	10059
Pilot_screen_BYxRM	haploid-R1	P2	L23	YAL043C	BY	Haploid	Bad-count-var	3.166	3.134	0.047	3.2494	3.1337	6.6517	161	3.254	3.201	0.0818	3.3555	3.2008	6.6184	2283
Pilot_screen_BYxRM	haploid-R1	P2	L23	YAL043C	RM	Haploid	Bad-var	3.098	3.106	0.0121	3.1119	3.1057	5.0162	678	3.084	3.092	0.0266	3.1233	3.0921	6.4894	6030
Pilot_screen_BYxRM	haploid-R2	P8	L11,L12	YAL044C	BY	Haploid	OK	3.425	3.507	0.112	3.5269	3.5073	6.8862	1744	3.428	3.493	0.1335	3.5599	3.4933	7.3838	17327
Pilot_screen_BYxRM	haploid-R2	P8	L11,L12	YAL044C	RM	Haploid	OK	3.229	3.251	0.0714	3.3049	3.2507	6.4512	1573	3.215	3.25	0.092	3.3079	3.2502	6.3679	14735
Pilot_screen_BYxRM	haploid-R1	P8	L12	YAL044C	BY	Haploid	OK	3.55	3.609	0.0735	3.6219	3.6087	6.8693	947	3.522	3.567	0.0974	3.6253	3.5674	7.2327	9648
Pilot_screen_BYxRM	haploid-R1	P8	L12	YAL044C	RM	Haploid	OK	3.418	3.437	0.0712	3.5032	3.4372	6.9636	722	3.399	3.418	0.0906	3.5022	3.4183	6.8524	6910
Pilot_screen_BYxRM	haploid-R2	P3	K02	YAL047C	BY	Haploid	OK	2.913	2.923	0.0276	2.9476	2.9232	5.3638	550	2.899	2.908	0.0317	2.9372	2.9077	5.3069	5530
Pilot_screen_BYxRM	haploid-R2	P3	K02	YAL047C	RM	Haploid	OK	2.823	2.836	0.0469	2.8692	2.8357	5.1004	415	2.85	2.865	0.046	2.9008	2.8653	5.3265	4069
Pilot_screen_BYxRM	haploid-R1	P3	K2	YAL047C	BY	Haploid	OK	2.939	2.933	0.0293	2.9791	2.933	5.4487	434	3.053	3	0.0703	3.1403	2.9996	5.9891	5991
Pilot_screen_BYxRM	haploid-R1	P3	K2	YAL047C	RM	Haploid	OK	2.885	2.89	0.0222	2.9138	2.8897	5.1655	1160	2.876	2.874	0.0395	2.926	2.8736	5.4526	9906
Pilot_screen_BYxRM	fillin	Haploid-fillin_P1	A10	YAL047C	BY	Haploid	NA	3.125	3.099	0.046	3.1835	3.0989	5.9555	705	3.077	3.037	0.0831	3.1776	3.0373	6.1335	8221
Pilot_screen_BYxRM	fillin	Haploid-fillin_P1	A10	YAL047C	RM	Haploid	NA	2.991	2.996	0.0217	3.0157	2.9956	5.1392	1490	2.918	2.921	0.0428	2.9662	2.9214	5.3446	14287
Pilot_screen_BYxRM	haploid-R2	P7	D10,D9	YAL049C	BY	Haploid	Bad-var	2.656	2.661	0.0322	2.695	2.6614	4.7733	2138	2.692	2.677	0.064	2.7795	2.6771	5.4666	21183
Pilot_screen_BYxRM	haploid-R2	P7	D10,D9	YAL049C	RM	Haploid	Bad-var	2.664	2.694	0.058	2.7165	2.694	4.7338	1782	2.68	2.709	0.0711	2.7481	2.7094	5.0302	17422
Pilot_screen_BYxRM	haploid-R1	P7	D10	YAL049C	BY	Haploid	Bad-var	2.972	2.96	0.0299	3.0144	2.9598	5.612	484	3.014	2.961	0.0761	3.1241	2.961	6.2271	4885
Pilot_screen_BYxRM	haploid-R1	P7	D10	YAL049C	RM	Haploid	Bad-count-var	2.948	2.933	0.0346	3.0162	2.9328	6.3932	245	2.961	2.95	0.0478	3.0246	2.9503	5.9779	2390
Pilot_screen_BYxRM	haploid-R2	P10	J15,J16	YAL053W	BY	Haploid	OK	2.783	2.783	0.0195	2.806	2.7831	4.6662	777	2.807	2.796	0.0585	2.8713	2.7965	5.269	7909
Pilot_screen_BYxRM	haploid-R2	P10	J15,J16	YAL053W	RM	Haploid	OK	2.708	2.718	0.0209	2.7313	2.7184	4.4921	1037	2.688	2.706	0.0375	2.7271	2.7065	4.6909	9690
Pilot_screen_BYxRM	haploid-R1	P10	I16	YAL053W	BY	Haploid	OK	2.975	2.97	0.0208	3.0038	2.9696	5.4082	828	3.024	2.981	0.0604	3.1052	2.9812	6.0073	8582
Pilot_screen_BYxRM	haploid-R1	P10	I16	YAL053W	RM	Haploid	OK	2.937	2.938	0.0174	2.9584	2.9379	5.0257	671	2.963	2.96	0.031	3.0008	2.9605	5.3827	6251
Pilot_screen_BYxRM	haploid-R2	P2	L15,L16	YAL054C	BY	Haploid	OK	3.072	3.033	0.1019	3.2704	3.0327	7.1294	1252	3.277	3.077	0.3471	3.7749	3.077	8.0737	12527
Pilot_screen_BYxRM	haploid-R2	P2	L15,L16	YAL054C	RM	Haploid	OK	2.964	2.96	0.0545	3.0319	2.9605	5.8406	1129	2.976	2.978	0.0744	3.061	2.978	5.9422	10824
Pilot_screen_BYxRM	haploid-R1	P2	L16	YAL054C	BY	Haploid	Bad-count	3.195	3.05	0.1935	3.5098	3.0497	7.4864	136	3.47	3.225	0.3556	3.8642	3.2255	7.9471	1993
Pilot_screen_BYxRM	haploid-R1	P2	L16	YAL054C	RM	Haploid	OK	2.946	2.919	0.0344	2.9989	2.9192	5.8188	533	2.939	2.921	0.0521	3.0106	2.9214	5.8903	4672
Pilot_screen_BYxRM	haploid-R2	P8	L15,L16	YAL055W	BY	Haploid	OK	2.649	2.657	0.0294	2.6831	2.6571	4.6401	1862	2.706	2.681	0.0726	2.7913	2.6808	5.2989	18683
Pilot_screen_BYxRM	haploid-R2	P8	L15,L16	YAL055W	RM	Haploid	OK	2.53	2.548	0.0347	2.5671	2.5478	4.3615	1175	2.54	2.556	0.0538	2.6005	2.5564	5.4859	10864
Pilot_screen_BYxRM	haploid-R1	P8	L16	YAL055W	BY	Haploid	OK	2.923	2.919	0.0171	2.9449	2.919	5.0704	1198	2.962	2.93	0.0543	3.0403	2.9302	5.9853	11661
Pilot_screen_BYxRM	haploid-R1	P8	L16	YAL055W	RM	Haploid	OK	2.861	2.868	0.0227	2.8896	2.8677	5.0596	449	2.91	2.896	0.047	2.9681	2.8965	5.5269	4690
Pilot_screen_BYxRM	haploid-R2	P2	I1,I2	YAL056W	BY	Haploid	OK	3.087	3.094	0.031	3.1247	3.0936	5.6954	1107	3.158	3.133	0.0716	3.2457	3.1334	6.343	11298
Pilot_screen_BYxRM	haploid-R2	P2	I1,I2	YAL056W	RM	Haploid	OK	3.007	3.021	0.0425	3.0635	3.0206	6.0607	1047	3.008	3.023	0.055	3.079	3.023	6.2087	9798
Pilot_screen_BYxRM	haploid-R1	P2	I1	YAL056W	BY	Haploid	OK	3.067	3.051	0.0249	3.1039	3.0512	5.7889	484	3.116	3.076	0.0534	3.1855	3.0759	6.17	5516
Pilot_screen_BYxRM	haploid-R1	P2	I1	YAL056W	RM	Haploid	OK	2.952	2.956	0.0167	2.972	2.9557	4.9391	893	2.966	2.966	0.0287	2.9988	2.9658	5.2475	8240
Pilot_screen_BYxRM	haploid-R2	P10	L19,L20	YAL058W	BY	Haploid	OK	2.681	2.692	0.03	2.715	2.6924	4.6962	2122	2.717	2.721	0.06	2.7819	2.7211	5.0615	21317
Pilot_screen_BYxRM	haploid-R2	P10	L19,L20	YAL058W	RM	Haploid	OK	2.583	2.603	0.0307	2.6156	2.6033	4.3993	1700	2.586	2.605	0.0548	2.6405	2.6055	4.6741	15863
Pilot_screen_BYxRM	haploid-R1	P10	L20	YAL058W	BY	Haploid	OK	2.968	2.963	0.0226	2.999	2.9634	5.4414	737	3.022	2.982	0.0624	3.1049	2.9825	6.0065	7793
Pilot_screen_BYxRM	haploid-R1	P10	L20	YAL058W	RM	Haploid	OK	2.903	2.905	0.0231	2.9322	2.9047	5.1443	687	2.917	2.912	0.0368	2.9627	2.9118	5.4252	6290
Pilot_screen_BYxRM	fillin	Haploid-fillin_P1	A11	YAL058W	BY	Haploid	NA	3.101	3.09	0.0375	3.1473	3.0899	5.754	999	3.082	3.047	0.0767	3.1756	3.0473	6.1017	11148
Pilot_screen_BYxRM	fillin	Haploid-fillin_P1	A11	YAL058W	RM	Haploid	NA	3.004	3.012	0.0212	3.0276	3.0116	5.1143	1341	2.931	2.935	0.0406	2.9761	2.9345	5.3162	12857
Pilot_screen_BYxRM	haploid-R2	P11	O15,O16	YAL059W	BY	Haploid	OK	2.838	2.87	0.0315	2.8706	2.8696	4.894	1651	2.834	2.849	0.0484	2.8855	2.8486	5.1723	16418
Pilot_screen_BYxRM	haploid-R2	P11	O15,O16	YAL059W	RM	Haploid	OK	2.816	2.83	0.0321	2.851	2.8298	4.915	1041	2.823	2.84	0.043	2.8684	2.8396	5.0484	9871
Pilot_screen_BYxRM	haploid-R1	P11	P15	YAL059W	BY	Haploid	OK	3.114	3.118	0.0151	3.1312	3.1177	5.2209	1009	3.136	3.121	0.0367	3.1837	3.1211	5.8958	10179
Pilot_screen_BYxRM	haploid-R1	P11	P15	YAL059W	RM	Haploid	OK	3.115	3.116	0.0145	3.1316	3.1163	5.2068	587	3.124	3.127	0.0262	3.1545	3.1271	5.5126	5701
Pilot_screen_BYxRM	haploid-R2	P5	F08	YAL060W	BY	Haploid	OK	3.575	3.617	0.0549	3.6287	3.6175	6.5805	465	3.554	3.59	0.0669	3.6172	3.5905	6.6341	4617
Pilot_screen_BYxRM	haploid-R2	P5	F08	YAL060W	RM	Haploid	OK	3.41	3.463	0.0829	3.4886	3.4628	6.4322	313	3.439	3.474	0.0776	3.5143	3.4737	6.5222	3093
Pilot_screen_BYxRM	haploid-R1	P5	F8	YAL060W	BY	Haploid	OK	3.456	3.491	0.0538	3.5106	3.4913	6.3883	524	3.485	3.492	0.0856	3.5801	3.4917	6.8698	6706
Pilot_screen_BYxRM	haploid-R1	P5	F8	YAL060W	RM	Haploid	OK	3.406	3.425	0.0405	3.4493	3.4248	6.1761	887	3.412	3.435	0.0544	3.4704	3.4353	6.3845	7332
Pilot_screen_BYxRM	haploid-R2	P5	I02	YAL061W	BY	Haploid	OK	3.254	3.222	0.0862	3.4435	3.2221	7.8798	472	3.271	3.219	0.1182	3.5614	3.219	8.2725	4758
Pilot_screen_BYxRM	haploid-R2	P5	I02	YAL061W	RM	Haploid	OK	3.087	3.061	0.0871	3.2466	3.0613	7.33	490	3.117	3.071	0.1103	3.4213	3.0711	8.1565	4752
Pilot_screen_BYxRM	haploid-R1	P5	I2	YAL061W	BY	Haploid	OK	3.266	3.217	0.0849	3.4616	3.2173	7.9861	725	3.3	3.235	0.1261	3.5278	3.2348	7.9825	7998
Pilot_screen_BYxRM	haploid-R1	P5	I2	YAL061W	RM	Haploid	OK	3.074	3.03	0.066	3.2262	3.0299	7.3795	994	3.102	3.06	0.0823	3.299	3.0597	7.7257	8964
Pilot_screen_BYxRM	fillin	Haploid-fillin_P1	A12	YAL061W	BY	Haploid	NA	3.408	3.364	0.0817	3.5084	3.364	6.8085	710	3.325	3.266	0.118	3.4763	3.2659	7.0496	8316
Pilot_screen_BYxRM	fillin	Haploid-fillin_P1	A12	YAL061W	RM	Haploid	NA	3.141	3.128	0.0405	3.1927	3.1278	5.9203	1493	3.079	3.069	0.0542	3.145	3.0694	5.9354	13325
Pilot_screen_BYxRM	haploid-R2	P11	I19,I20	YAR002C-A	BY	Haploid	OK	3.176	3.213	0.0514	3.2232	3.2127	5.6488	2106	3.159	3.187	0.0641	3.2206	3.1872	5.8439	20746
Pilot_screen_BYxRM	haploid-R2	P11	I19,I20	YAR002C-A	RM	Haploid	OK	3.196	3.227	0.0388	3.2298	3.2272	5.508	1517	3.185	3.22	0.0638	3.2428	3.2197	5.8158	14294
Pilot_screen_BYxRM	haploid-R1	P11	J19	YAR002C-A	BY	Haploid	OK	3.448	3.47	0.0282	3.4749	3.4697	5.9417	899	3.438	3.452	0.0381	3.477	3.4519	6.1838	9275
Pilot_screen_BYxRM	haploid-R1	P11	J19	YAR002C-A	RM	Haploid	OK	3.461	3.474	0.025	3.4874	3.474	6.0618	503	3.462	3.483	0.0422	3.5058	3.4834	6.3485	4722
Pilot_screen_BYxRM	haploid-R2	P10	C3,C4	YAR002W	BY	Haploid	Bad-mean	2.902	2.926	0.0223	2.9246	2.9259	4.8008	1134	2.958	2.972	0.0464	3.0061	2.9718	5.369	12992
Pilot_screen_BYxRM	haploid-R2	P10	C3,C4	YAR002W	RM	Haploid	Bad-mean	2.901	2.92	0.0192	2.9203	2.9199	4.7266	2226	2.885	2.912	0.04	2.9256	2.9122	5.0641	21474
Pilot_screen_BYxRM	haploid-R1	P10	D3	YAR002W	BY	Haploid	Bad-count-mean	3.314	3.342	0.0199	3.3362	3.3433	5.6549	14	3.268	3.269	0.0598	3.3334	3.2689	6.1477	164
Pilot_screen_BYxRM	haploid-R1	P10	D3	YAR002W	RM	Haploid	Bad-count-mean	3.306	3.385	0.0435	3.351	3.3905	5.9159	8	3.25	3.287	0.0573	3.3125	3.2872	6.0618	68
Pilot_screen_BYxRM	haploid-R2	P5	A12	YAR003W	BY	Haploid	OK	2.917	2.937	0.0374	2.9591	2.9366	5.3549	424	2.938	2.955	0.0378	2.9787	2.9554	5.2869	4691
Pilot_screen_BYxRM	haploid-R2	P5	A12	YAR003W	RM	Haploid	OK	2.855	2.867	0.0379	2.8951	2.8666	5.0457	933	2.866	2.887	0.0418	2.9093	2.8868	5.232	9034
Pilot_screen_BYxRM	haploid-R1	P5	A12	YAR003W	BY	Haploid	OK	3	2.99	0.0254	3.0354	2.9898	5.5549	1037	3.013	2.992	0.0474	3.0752	2.9925	5.8375	11674
Pilot_screen_BYxRM	haploid-R1	P5	A12	YAR003W	RM	Haploid	OK	3.03	3.002	0.043	3.0812	3.0017	5.5832	1701	3.059	3.045	0.0543	3.1216	3.0446	5.7611	15553
Pilot_screen_BYxRM	fillin	Haploid-fillin_P1	A13	YAR003W	BY	Haploid	NA	3.133	3.128	0.0277	3.168	3.128	5.6798	1132	3.113	3.092	0.0572	3.1827	3.0917	5.9809	11624
Pilot_screen_BYxRM	fillin	Haploid-fillin_P1	A13	YAR003W	RM	Haploid	NA	3.057	3.063	0.0194	3.0793	3.0628	5.1761	1229	3.016	3.018	0.0353	3.0559	3.018	5.4143	9512
Pilot_screen_BYxRM	haploid-R2	P3	C02	YAR007C	BY	Haploid	OK	3.386	3.404	0.029	3.4158	3.4038	5.9318	555	3.393	3.41	0.0346	3.4291	3.4104	6.0484	5556
Pilot_screen_BYxRM	haploid-R2	P3	C02	YAR007C	RM	Haploid	Bad-count	3.274	3.321	0.0647	3.3359	3.3214	6.043	249	3.319	3.367	0.0719	3.4015	3.3666	7.2964	2425
Pilot_screen_BYxRM	haploid-R1	P3	C2	YAR007C	BY	Haploid	OK	3.37	3.387	0.0272	3.3989	3.3871	5.8853	783	3.388	3.386	0.05	3.4443	3.3861	6.3508	9208
Pilot_screen_BYxRM	haploid-R1	P3	C2	YAR007C	RM	Haploid	OK	3.33	3.357	0.0269	3.3568	3.3572	5.7106	796	3.32	3.337	0.0448	3.3672	3.3372	6.1038	6485
Pilot_screen_BYxRM	fillin	Haploid-fillin_P1	A14	YAR007C	BY	Haploid	NA	3.417	3.453	0.0419	3.46	3.4534	6.1652	986	3.409	3.409	0.0549	3.4713	3.4086	6.4669	11028
Pilot_screen_BYxRM	fillin	Haploid-fillin_P1	A14	YAR007C	RM	Haploid	NA	3.401	3.419	0.0285	3.4306	3.4194	5.9336	931	3.358	3.37	0.0431	3.4043	3.37	6.1471	7323
Pilot_screen_BYxRM	haploid-R2	P1	L7,L8	YAR009C	BY	Haploid	OK	3.092	3.103	0.0492	3.144	3.1034	5.7194	888	3.112	3.121	0.0619	3.1792	3.121	5.9557	8760
Pilot_screen_BYxRM	haploid-R2	P1	L7,L8	YAR009C	RM	Haploid	OK	3.073	3.076	0.0613	3.1414	3.0759	5.9328	1132	3.071	3.084	0.0775	3.1515	3.0843	5.9556	10669
Pilot_screen_BYxRM	haploid-R1	P1	K8	YAR009C	BY	Haploid	OK	2.981	2.97	0.0306	3.0232	2.9705	5.7259	441	3.009	2.992	0.0534	3.0751	2.9925	5.7901	5069
Pilot_screen_BYxRM	haploid-R1	P1	K8	YAR009C	RM	Haploid	OK	3.034	3.023	0.0392	3.0782	3.0226	5.4898	485	3.059	3.056	0.0549	3.1238	3.0559	5.9112	4119
Pilot_screen_BYxRM	haploid-R2	P2	L7,L8	YAR014C	BY	Haploid	OK	3.278	3.281	0.0363	3.3276	3.2811	6.2956	768	3.314	3.295	0.0575	3.3836	3.2946	6.4309	9144
Pilot_screen_BYxRM	haploid-R2	P2	L7,L8	YAR014C	RM	Haploid	OK	3.201	3.201	0.0268	3.2368	3.2008	5.9664	850	3.177	3.182	0.0403	3.2245	3.1825	5.9784	7820
Pilot_screen_BYxRM	haploid-R1	P2	L8	YAR014C	BY	Haploid	Bad-count	3.197	3.202	0.0277	3.2301	3.2019	5.7288	239	3.246	3.227	0.0549	3.309	3.2272	6.1342	3736
Pilot_screen_BYxRM	haploid-R1	P2	L8	YAR014C	RM	Haploid	OK	3.138	3.148	0.0132	3.1532	3.1481	5.1867	566	3.117	3.125	0.0246	3.145	3.1253	5.4714	4355
Pilot_screen_BYxRM	haploid-R2	P7	A21,A22	YAR015W	BY	Haploid	OK	3.256	3.288	0.0438	3.2942	3.2883	5.7008	1365	3.258	3.283	0.0665	3.3198	3.283	6.0607	13472
Pilot_screen_BYxRM	haploid-R2	P7	A21,A22	YAR015W	RM	Haploid	OK	3.275	3.306	0.0533	3.3197	3.3059	5.8222	1229	3.272	3.307	0.0653	3.33	3.3068	5.9942	12116
Pilot_screen_BYxRM	haploid-R1	P7	A21	YAR015W	BY	Haploid	OK	3.437	3.458	0.0214	3.4578	3.4584	5.8242	1217	3.44	3.446	0.0397	3.4836	3.4463	6.3298	12502
Pilot_screen_BYxRM	haploid-R1	P7	A21	YAR015W	RM	Haploid	OK	3.441	3.452	0.0237	3.4652	3.4524	5.934	720	3.447	3.46	0.0407	3.4894	3.4598	6.2788	6806
Pilot_screen_BYxRM	haploid-R2	P1	F15,F16	YAR019C	BY	Haploid	OK	3.048	3.048	0.0349	3.0907	3.0477	5.6954	1656	3.058	3.054	0.0513	3.1196	3.0536	5.9817	16486
Pilot_screen_BYxRM	haploid-R2	P1	F15,F16	YAR019C	RM	Haploid	OK	3.028	3.03	0.0357	3.0757	3.0297	6.0531	1719	3.033	3.04	0.049	3.0886	3.0402	5.7991	16660
Pilot_screen_BYxRM	haploid-R1	P1	F16	YAR019C	BY	Haploid	OK	2.969	2.966	0.0173	2.9913	2.9665	5.239	788	3.005	2.98	0.0457	3.0658	2.9798	5.8156	8602
Pilot_screen_BYxRM	haploid-R1	P1	F16	YAR019C	RM	Haploid	OK	2.914	2.91	0.0219	2.944	2.9096	5.3224	509	2.946	2.937	0.0346	2.9899	2.9368	5.5173	4327
Pilot_screen_BYxRM	haploid-R2	P11	F1,F2	YAR027W	BY	Haploid	OK	2.684	2.68	0.046	2.7461	2.6803	5.2984	1436	2.719	2.707	0.0662	2.7999	2.7066	5.3556	14284
Pilot_screen_BYxRM	haploid-R2	P11	F1,F2	YAR027W	RM	Haploid	OK	2.63	2.647	0.0374	2.668	2.6474	4.5491	1460	2.649	2.666	0.0506	2.7008	2.6661	4.7768	13907
Pilot_screen_BYxRM	haploid-R1	P11	E2	YAR027W	BY	Haploid	OK	3.029	3.02	0.0192	3.0553	3.0202	5.4793	468	3.057	3.024	0.0508	3.1258	3.0244	5.9604	5532
Pilot_screen_BYxRM	haploid-R1	P11	E2	YAR027W	RM	Haploid	OK	2.968	2.981	0.0142	2.9839	2.9814	4.7961	479	3.002	2.999	0.0326	3.0399	2.9987	5.4262	3927
Pilot_screen_BYxRM	fillin	Haploid-fillin_P1	A15	YAR027W	BY	Haploid	NA	3.139	3.133	0.0316	3.1787	3.1331	5.779	1067	3.11	3.087	0.0597	3.1826	3.0869	6.0039	10510
Pilot_screen_BYxRM	fillin	Haploid-fillin_P1	A15	YAR027W	RM	Haploid	NA	3.044	3.049	0.0219	3.068	3.0495	5.1813	1361	2.986	2.988	0.0402	3.0309	2.9878	5.4185	11637
Pilot_screen_BYxRM	haploid-R2	P11	B1,B2	YAR028W	BY	Haploid	OK	2.733	2.746	0.0318	2.7672	2.7461	4.7102	2416	2.755	2.762	0.0576	2.8172	2.7619	5.1139	24105
Pilot_screen_BYxRM	haploid-R2	P11	B1,B2	YAR028W	RM	Haploid	OK	2.647	2.667	0.0356	2.6848	2.6671	4.5856	1269	2.638	2.653	0.0591	2.6991	2.6534	4.8346	11899
Pilot_screen_BYxRM	haploid-R1	P11	A2	YAR028W	BY	Haploid	OK	3.082	3.086	0.0247	3.1134	3.086	5.6213	1512	3.095	3.086	0.0455	3.1509	3.0862	5.8759	15470
Pilot_screen_BYxRM	haploid-R1	P11	A2	YAR028W	RM	Haploid	OK	2.977	2.984	0.0251	3.0086	2.9837	5.3923	1206	2.995	2.996	0.0418	3.0471	2.996	5.8188	11637
Pilot_screen_BYxRM	fillin	Haploid-fillin_P1	A16	YAR028W	BY	Haploid	NA	3.165	3.158	0.0324	3.2046	3.1581	5.8022	1069	3.151	3.132	0.0526	3.2141	3.1321	5.9928	10814
Pilot_screen_BYxRM	fillin	Haploid-fillin_P1	A16	YAR028W	RM	Haploid	NA	3.084	3.078	0.0258	3.1137	3.0782	5.3856	1026	3.036	3.036	0.0412	3.0831	3.0357	5.5507	9122
Pilot_screen_BYxRM	haploid-R2	P2	C5,C6	YAR044W	BY	Haploid	OK	3.217	3.231	0.0269	3.2466	3.2307	5.6852	2232	3.252	3.238	0.0615	3.3231	3.2376	6.237	22489
Pilot_screen_BYxRM	haploid-R2	P2	C5,C6	YAR044W	RM	Haploid	OK	3.196	3.21	0.0203	3.2176	3.2101	5.4254	1293	3.194	3.201	0.0371	3.2336	3.2013	5.7381	12094
Pilot_screen_BYxRM	haploid-R1	P2	C5	YAR044W	BY	Haploid	OK	3.213	3.201	0.0348	3.2573	3.2011	5.9884	366	3.252	3.233	0.0602	3.3224	3.2327	6.2467	4783
Pilot_screen_BYxRM	haploid-R1	P2	C5	YAR044W	RM	Haploid	OK	3.148	3.155	0.0126	3.1616	3.1551	5.1106	866	3.144	3.145	0.0307	3.1791	3.1452	5.5901	7510
Pilot_screen_BYxRM	haploid-R2	P4	D16	YAR071W	BY	Haploid	Bad-mean	2.803	2.818	0.0354	2.8426	2.8184	5.1467	1237	2.81	2.823	0.0402	2.8577	2.8231	5.3367	12716
Pilot_screen_BYxRM	haploid-R2	P4	D16	YAR071W	RM	Haploid	Bad-mean	2.718	2.723	0.0419	2.7641	2.723	4.9126	365	2.771	2.778	0.0672	2.8826	2.7786	6.2465	3194
Pilot_screen_BYxRM	haploid-R1	P4	D16	YAR071W	BY	Haploid	Bad-mean	3.038	3.016	0.0375	3.0875	3.0164	5.7193	257	3.011	2.971	0.0763	3.1095	2.971	6.0969	5503
Pilot_screen_BYxRM	haploid-R1	P4	D16	YAR071W	RM	Haploid	Bad-mean	3.021	3.024	0.0106	3.0368	3.0243	5.4475	1461	3.022	3.031	0.02	3.0473	3.0313	5.5177	11615
Pilot_screen_BYxRM	haploid-R2	P9	C7,C8	YBL001C	BY	Haploid	OK	3.05	2.912	0.1829	3.2594	2.9122	6.5101	640	2.974	2.894	0.2642	3.2487	2.8937	6.5932	6326
Pilot_screen_BYxRM	haploid-R2	P9	C7,C8	YBL001C	RM	Haploid	Bad-count	2.928	2.967	0.0369	2.9667	2.9667	5.1252	82	2.819	2.868	0.1213	2.9408	2.8685	5.6336	774
Pilot_screen_BYxRM	haploid-R1	P9	D7	YBL001C	BY	Haploid	Bad-count	3.199	3.075	0.1515	3.4503	3.075	7.3328	198	3.252	3.167	0.154	3.4592	3.1669	7.1458	2335
Pilot_screen_BYxRM	haploid-R1	P9	D7	YBL001C	RM	Haploid	Bad-count	3.188	3.189	0.0326	3.2374	3.1892	6.2655	236	3.175	3.173	0.0526	3.2553	3.1725	6.6298	2003
Pilot_screen_BYxRM	haploid-R2	P9	L7,L8	YBL002W	BY	Haploid	Bad-count-mean	2.772	2.695	0.1458	3.0719	2.6951	6.7595	148	2.852	2.739	0.2352	3.2435	2.7389	7.063	1905
Pilot_screen_BYxRM	haploid-R2	P9	L7,L8	YBL002W	RM	Haploid	Bad-count-mean	2.943	2.818	0.1789	3.2336	2.8178	6.8471	138	2.925	2.795	0.246	3.2992	2.795	7.0584	1285
Pilot_screen_BYxRM	haploid-R1	P9	K8	YBL002W	BY	Haploid	Bad-mean	3.414	3.164	0.2339	3.7034	3.1645	7.5623	347	3.409	3.24	0.2583	3.7062	3.2397	7.5568	3380
Pilot_screen_BYxRM	haploid-R1	P9	K8	YBL002W	RM	Haploid	Bad-count-mean	3.936	4.133	0.1659	4.0671	4.1327	7.6569	43	3.758	3.931	0.3042	4.0201	3.9305	7.9106	503
Pilot_screen_BYxRM	haploid-R2	P9	D10,D9	YBL003C	BY	Haploid	Bad-mean	3.015	2.832	0.2379	3.3374	2.8324	6.9451	506	3.081	2.88	0.3347	3.449	2.8804	7.0766	5480
Pilot_screen_BYxRM	haploid-R2	P9	D10,D9	YBL003C	RM	Haploid	Bad-mean	3.524	3.811	0.2947	3.747	3.8114	7.1697	522	3.455	3.789	0.3602	3.7321	3.7887	7.2529	4905
Pilot_screen_BYxRM	haploid-R1	P9	C10	YBL003C	BY	Haploid	Bad-count-mean	3.343	3.09	0.2169	3.6189	3.09	7.4283	205	3.27	3.146	0.201	3.5299	3.1461	7.2605	2047
Pilot_screen_BYxRM	haploid-R1	P9	C10	YBL003C	RM	Haploid	Bad-count-mean	3.453	3.26	0.2083	3.723	3.2603	7.7155	45	3.379	3.225	0.2665	3.7252	3.2247	7.8167	496
Pilot_screen_BYxRM	haploid-R2	P9	F3,F4	YBL004W	BY	Haploid	OK	2.891	2.934	0.0466	2.9365	2.9339	5.1011	1383	2.893	2.925	0.061	2.9517	2.9254	5.2804	14042
Pilot_screen_BYxRM	haploid-R2	P9	F3,F4	YBL004W	RM	Haploid	OK	2.898	2.913	0.031	2.9299	2.9133	4.9959	676	2.887	2.907	0.0535	2.9411	2.9066	5.2605	6450
Pilot_screen_BYxRM	haploid-R1	P9	F4	YBL004W	BY	Haploid	OK	3.123	3.138	0.0264	3.1531	3.1382	5.523	679	3.126	3.13	0.0385	3.1692	3.1298	5.687	7826
Pilot_screen_BYxRM	haploid-R1	P9	F4	YBL004W	RM	Haploid	OK	3.123	3.132	0.014	3.1391	3.1324	5.1517	631	3.124	3.132	0.0293	3.1559	3.1318	5.4738	5209
Pilot_screen_BYxRM	haploid-R2	P1	L15,L16	YBL005W	BY	Haploid	Bad-count	3.204	3.179	0.0479	3.2594	3.1793	5.9407	145	3.209	3.198	0.0607	3.2769	3.1976	6.1055	1604
Pilot_screen_BYxRM	haploid-R2	P1	L15,L16	YBL005W	RM	Haploid	OK	3.063	3.052	0.0468	3.1234	3.0522	5.9116	476	3.064	3.063	0.0734	3.144	3.0628	5.9489	4579
Pilot_screen_BYxRM	haploid-R1	P1	L16	YBL005W	BY	Haploid	OK	3.024	2.998	0.0412	3.0784	2.998	5.7848	302	3.079	3.061	0.0627	3.1542	3.0609	5.9939	2941
Pilot_screen_BYxRM	haploid-R1	P1	L16	YBL005W	RM	Haploid	Bad-count	3.048	3.012	0.0326	3.0861	3.0121	5.4422	70	3.062	3.071	0.0491	3.1196	3.0711	5.7966	800
Pilot_screen_BYxRM	haploid-R2	P1	J13,J14	YBL007C	BY	Haploid	OK	3.488	3.57	0.0564	3.5429	3.5698	6.3736	410	3.438	3.482	0.0689	3.5089	3.4822	6.4856	4089
Pilot_screen_BYxRM	haploid-R2	P1	J13,J14	YBL007C	RM	Haploid	OK	3.425	3.508	0.064	3.4835	3.5081	6.29	882	3.398	3.461	0.0728	3.468	3.4612	6.3939	8291
Pilot_screen_BYxRM	haploid-R1	P1	I14	YBL007C	BY	Haploid	OK	3.284	3.404	0.0881	3.3751	3.4044	6.2918	281	3.317	3.368	0.0878	3.4086	3.3677	6.4382	3268
Pilot_screen_BYxRM	haploid-R1	P1	I14	YBL007C	RM	Haploid	OK	3.362	3.412	0.0383	3.3964	3.4119	5.8315	312	3.318	3.372	0.0587	3.3764	3.372	6.1193	2610
Pilot_screen_BYxRM	haploid-R2	P2	D23,D24	YBL008W	BY	Haploid	OK	3.21	3.196	0.0426	3.2635	3.1961	6.1163	1619	3.233	3.231	0.0839	3.3245	3.2307	6.3239	16044
Pilot_screen_BYxRM	haploid-R2	P2	D23,D24	YBL008W	RM	Haploid	OK	2.974	3.003	0.0506	3.0223	3.0035	5.3888	1421	2.964	2.987	0.0696	3.0341	2.9866	5.6183	12644
Pilot_screen_BYxRM	haploid-R1	P2	C24	YBL008W	BY	Haploid	OK	3.034	3.009	0.0436	3.0946	3.0095	5.8809	456	3.112	3.083	0.0866	3.2153	3.0832	6.2504	5719
Pilot_screen_BYxRM	haploid-R1	P2	C24	YBL008W	RM	Haploid	OK	2.915	2.919	0.0213	2.9404	2.919	5.0195	796	2.916	2.913	0.0445	2.9725	2.9129	6.092	6723
Pilot_screen_BYxRM	haploid-R2	P7	N7,N8	YBL010C	BY	Haploid	OK	2.707	2.726	0.0215	2.7299	2.7263	4.4378	524	2.719	2.731	0.0419	2.7648	2.7313	4.8865	5139
Pilot_screen_BYxRM	haploid-R2	P7	N7,N8	YBL010C	RM	Haploid	OK	2.656	2.673	0.0305	2.6887	2.6733	4.5448	296	2.679	2.697	0.0488	2.7295	2.6971	4.8404	2879
Pilot_screen_BYxRM	haploid-R1	P7	M8	YBL010C	BY	Haploid	OK	3.004	3.015	0.0143	3.0199	3.0153	4.9452	310	3.02	3.012	0.0311	3.0596	3.0125	5.6178	3253
Pilot_screen_BYxRM	haploid-R1	P7	M8	YBL010C	RM	Haploid	Bad-count	2.959	2.955	0.0156	2.979	2.9554	5.1038	114	2.946	2.942	0.0337	2.9862	2.9424	5.3581	1005
Pilot_screen_BYxRM	fillin	Haploid-fillin_P1	A17	YBL010C	BY	Haploid	NA	3.151	3.128	0.0381	3.2002	3.1278	5.9037	685	3.137	3.115	0.0744	3.2242	3.1149	6.1319	8069
Pilot_screen_BYxRM	fillin	Haploid-fillin_P1	A17	YBL010C	RM	Haploid	NA	3.054	3.06	0.0203	3.0773	3.0598	5.2119	721	2.987	2.986	0.0413	3.0338	2.9865	5.4482	6766
Pilot_screen_BYxRM	haploid-R2	P10	F13,F14	YBL011W	BY	Haploid	Bad-count	2.852	2.877	0.0574	2.9143	2.8767	5.3212	132	2.88	2.914	0.096	2.975	2.9139	5.5573	1663
Pilot_screen_BYxRM	haploid-R2	P10	F13,F14	YBL011W	RM	Haploid	OK	2.897	2.955	0.0477	2.9413	2.9552	5.0515	1049	2.848	2.882	0.0645	2.9118	2.8821	5.2567	9510
Pilot_screen_BYxRM	haploid-R1	P10	E14	YBL011W	BY	Haploid	OK	3.167	3.185	0.0314	3.2044	3.1851	5.7559	630	3.189	3.181	0.0561	3.2547	3.1813	6.0885	6687
Pilot_screen_BYxRM	haploid-R1	P10	E14	YBL011W	RM	Haploid	OK	3.167	3.176	0.0171	3.1869	3.1761	5.3514	323	3.173	3.176	0.0425	3.2215	3.1765	5.8558	2686
Pilot_screen_BYxRM	haploid-R2	P5	N20	YBL013W	BY	Haploid	Bad-var	2.856	2.881	0.0407	2.8986	2.8809	5.1179	282	2.9	2.902	0.0456	2.9567	2.9022	5.6521	3021
Pilot_screen_BYxRM	haploid-R2	P5	N20	YBL013W	RM	Haploid	Bad-var	2.797	2.818	0.0426	2.843	2.8177	5.0077	269	2.809	2.819	0.0579	2.8704	2.8191	5.3193	2426
Pilot_screen_BYxRM	haploid-R1	P5	N20	YBL013W	BY	Haploid	Bad-count-var	3.079	3.06	0.0938	3.2135	3.0601	6.5571	37	3.264	3.255	0.0758	3.3475	3.2546	6.3058	906
Pilot_screen_BYxRM	haploid-R1	P5	N20	YBL013W	RM	Haploid	Bad-var	2.899	2.899	0.0215	2.9263	2.8992	5.1225	511	2.891	2.887	0.0353	2.9341	2.8869	5.2993	4497
Pilot_screen_BYxRM	haploid-R2	P2	G17,G18	YBL014C	BY	Haploid	OK	3.247	3.236	0.045	3.2996	3.2356	6.0792	1537	3.235	3.24	0.0958	3.3333	3.2396	6.3239	15271
Pilot_screen_BYxRM	haploid-R2	P2	G17,G18	YBL014C	RM	Haploid	OK	2.99	3.007	0.0482	3.0433	3.0067	5.6377	1618	2.994	3.011	0.0624	3.062	3.0108	5.8344	15250
Pilot_screen_BYxRM	haploid-R1	P2	G17	YBL014C	BY	Haploid	OK	3.134	3.08	0.0501	3.2018	3.0801	6.1199	318	3.192	3.195	0.0749	3.2757	3.195	6.1956	4405
Pilot_screen_BYxRM	haploid-R1	P2	G17	YBL014C	RM	Haploid	OK	2.996	3.002	0.0182	3.0231	3.0019	5.7761	646	2.977	2.98	0.0398	3.0233	2.9803	5.5893	5205
Pilot_screen_BYxRM	haploid-R2	P4	O05	YBL015W	BY	Haploid	Bad-mean	3.311	3.245	0.1218	3.4598	3.2446	6.889	492	3.35	3.27	0.1687	3.5669	3.27	7.3543	4652
Pilot_screen_BYxRM	haploid-R2	P4	O05	YBL015W	RM	Haploid	Bad-mean	3.27	3.245	0.1453	3.4441	3.2446	6.9568	416	3.274	3.258	0.1673	3.4686	3.2579	7.0492	4521
Pilot_screen_BYxRM	haploid-R1	P4	O5	YBL015W	BY	Haploid	Bad-count-mean	3.395	3.412	0.1078	3.5148	3.4122	6.8176	161	3.435	3.437	0.1476	3.6028	3.4371	7.1804	1838
Pilot_screen_BYxRM	haploid-R1	P4	O5	YBL015W	RM	Haploid	Bad-count-mean	3.193	3.185	0.0729	3.2785	3.1847	6.2052	200	3.158	3.131	0.0853	3.2649	3.1308	6.4011	1802
Pilot_screen_BYxRM	fillin	Haploid-fillin_P1	A18	YBL015W	BY	Haploid	NA	3.619	3.636	0.1692	3.8046	3.6357	7.5819	765	3.633	3.589	0.2404	3.9116	3.5887	8.0469	7729
Pilot_screen_BYxRM	fillin	Haploid-fillin_P1	A18	YBL015W	RM	Haploid	NA	3.469	3.499	0.1002	3.5815	3.4993	6.954	491	3.408	3.406	0.123	3.5612	3.4062	7.2672	3840
Pilot_screen_BYxRM	haploid-R2	P6	I18	YBL016W	BY	Haploid	OK	3.24	3.252	0.0248	3.267	3.2517	5.5957	445	3.226	3.241	0.0322	3.2628	3.2415	6.144	5122
Pilot_screen_BYxRM	haploid-R2	P6	I18	YBL016W	RM	Haploid	OK	3.277	3.311	0.0433	3.3193	3.3115	5.8402	355	3.282	3.315	0.0558	3.3366	3.3154	6.0286	2713
Pilot_screen_BYxRM	haploid-R1	P6	I18	YBL016W	BY	Haploid	OK	3.122	3.129	0.0292	3.1591	3.1289	5.8462	799	3.124	3.124	0.0393	3.1727	3.1239	5.9085	7565
Pilot_screen_BYxRM	haploid-R1	P6	I18	YBL016W	RM	Haploid	OK	3.177	3.178	0.0273	3.2103	3.1781	5.7395	411	3.177	3.175	0.0441	3.2273	3.1749	5.9119	4495
Pilot_screen_BYxRM	haploid-R2	P10	G23,G24	YBL017C	BY	Haploid	OK	2.963	3.007	0.0437	3.0086	3.0075	5.2826	1106	2.968	3.013	0.07	3.0357	3.0133	5.4951	11067
Pilot_screen_BYxRM	haploid-R2	P10	G23,G24	YBL017C	RM	Haploid	OK	2.929	2.995	0.0469	2.9738	2.9952	5.137	942	2.885	2.939	0.0689	2.9495	2.9392	5.2982	8702
Pilot_screen_BYxRM	haploid-R1	P10	G23	YBL017C	BY	Haploid	OK	3.199	3.229	0.0312	3.2353	3.2294	5.817	894	3.218	3.224	0.0484	3.2736	3.2237	6.0426	9857
Pilot_screen_BYxRM	haploid-R1	P10	G23	YBL017C	RM	Haploid	OK	3.234	3.248	0.0176	3.2514	3.248	5.374	662	3.22	3.233	0.0332	3.2558	3.2333	5.7448	5521
Pilot_screen_BYxRM	haploid-R2	P9	A15,A16	YBL018C	BY	Haploid	OK	2.747	2.757	0.026	2.7833	2.7568	5.4556	1036	2.782	2.772	0.0691	2.8657	2.7717	5.5731	10485
Pilot_screen_BYxRM	haploid-R2	P9	A15,A16	YBL018C	RM	Haploid	OK	2.656	2.67	0.0309	2.6891	2.6696	4.5342	1787	2.68	2.698	0.0499	2.7317	2.6979	4.8153	17443
Pilot_screen_BYxRM	haploid-R1	P9	A15	YBL018C	BY	Haploid	OK	3.005	3.001	0.0251	3.0401	3.0011	5.5947	1118	3.018	2.994	0.055	3.093	2.9938	5.9976	12730
Pilot_screen_BYxRM	haploid-R1	P9	A15	YBL018C	RM	Haploid	OK	2.969	2.974	0.0163	2.992	2.9742	5.6627	1696	2.996	2.999	0.0336	3.0343	2.9991	5.4247	14895
Pilot_screen_BYxRM	haploid-R2	P4	C24	YBL019W	BY	Haploid	OK	2.872	2.886	0.0293	2.9072	2.8862	5.1821	289	2.88	2.883	0.0411	2.9298	2.8833	5.5675	3299
Pilot_screen_BYxRM	haploid-R2	P4	C24	YBL019W	RM	Haploid	OK	2.797	2.818	0.0444	2.8751	2.8177	6.2103	336	2.81	2.828	0.0497	2.8713	2.8285	5.9303	2883
Pilot_screen_BYxRM	haploid-R1	P4	C24	YBL019W	BY	Haploid	OK	2.973	2.96	0.0236	3.0062	2.96	5.4609	592	3.024	2.991	0.0642	3.1056	2.9907	6.0017	6757
Pilot_screen_BYxRM	haploid-R1	P4	C24	YBL019W	RM	Haploid	OK	2.884	2.887	0.024	2.9119	2.8869	5.031	608	2.898	2.894	0.0435	2.9496	2.8937	5.4562	5111
Pilot_screen_BYxRM	fillin	Haploid-fillin_P1	A19	YBL019W	BY	Haploid	NA	3.089	3.064	0.039	3.1406	3.064	5.8566	1083	3.088	3.052	0.0789	3.1836	3.0519	6.1229	11420
Pilot_screen_BYxRM	fillin	Haploid-fillin_P1	A19	YBL019W	RM	Haploid	NA	2.958	2.961	0.0246	2.9871	2.9613	5.1556	1162	2.915	2.911	0.0452	2.9673	2.9111	5.3953	9735
Pilot_screen_BYxRM	haploid-R2	P9	L19,L20	YBL021C	BY	Haploid	Bad-mean	2.804	2.806	0.0228	2.8294	2.8065	4.7497	743	2.811	2.825	0.0521	2.8652	2.8254	5.1011	7454
Pilot_screen_BYxRM	haploid-R2	P9	L19,L20	YBL021C	RM	Haploid	Bad-mean	2.699	2.716	0.0232	2.7236	2.7158	4.4694	1288	2.69	2.703	0.0399	2.7321	2.7034	4.7468	12180
Pilot_screen_BYxRM	haploid-R1	P9	K20	YBL021C	BY	Haploid	Bad-mean	3.016	3.016	0.019	3.0437	3.0162	5.7455	1182	3.04	3.028	0.0407	3.1107	3.028	6.4915	11593
Pilot_screen_BYxRM	haploid-R1	P9	K20	YBL021C	RM	Haploid	Bad-count-mean	3.24	3.31	0.0607	3.2982	3.3099	5.9074	14	3.192	3.232	0.0745	3.2706	3.232	6.1176	241
Pilot_screen_BYxRM	fillin	Haploid-fillin_P1	A20	YBL021C	BY	Haploid	NA	3.138	3.118	0.0376	3.1869	3.1182	5.8989	1044	3.107	3.08	0.0727	3.1986	3.0803	6.3286	10654
Pilot_screen_BYxRM	fillin	Haploid-fillin_P1	A20	YBL021C	RM	Haploid	NA	3.048	3.053	0.0201	3.0712	3.0527	5.192	1175	2.984	2.989	0.0492	3.0391	2.9887	5.5183	11236
Pilot_screen_BYxRM	haploid-R2	P10	K13,K14	YBL022C	BY	Haploid	OK	2.934	2.975	0.048	2.9839	2.975	5.286	350	2.958	2.98	0.0986	3.0563	2.9802	5.7427	3390
Pilot_screen_BYxRM	haploid-R2	P10	K13,K14	YBL022C	RM	Haploid	OK	2.868	2.906	0.0377	2.9047	2.906	4.9428	1077	2.822	2.849	0.061	2.8837	2.8492	5.2146	9548
Pilot_screen_BYxRM	haploid-R1	P10	K13	YBL022C	BY	Haploid	OK	3.13	3.135	0.0214	3.1555	3.1347	5.47	556	3.181	3.153	0.057	3.2517	3.153	6.1367	6991
Pilot_screen_BYxRM	haploid-R1	P10	K13	YBL022C	RM	Haploid	OK	3.109	3.114	0.015	3.1267	3.1143	5.2322	751	3.109	3.114	0.0323	3.1465	3.1136	5.6139	5825
Pilot_screen_BYxRM	fillin	Haploid-fillin_P1	A21	YBL022C	BY	Haploid	NA	3.259	3.26	0.0386	3.3053	3.2603	6.055	918	3.243	3.207	0.0636	3.3227	3.2065	6.3475	10654
Pilot_screen_BYxRM	fillin	Haploid-fillin_P1	A21	YBL022C	RM	Haploid	NA	3.19	3.196	0.0207	3.2131	3.1964	5.4577	1390	3.131	3.131	0.038	3.1734	3.1311	5.6839	11832
Pilot_screen_BYxRM	haploid-R2	P3	C19	YBL024W	BY	Haploid	Bad-count	3.658	3.697	0.0476	3.7017	3.6974	6.6022	81	3.661	3.69	0.0476	3.706	3.6896	6.7628	1136
Pilot_screen_BYxRM	haploid-R2	P3	C19	YBL024W	RM	Haploid	OK	3.466	3.516	0.0582	3.5177	3.5165	6.2742	317	3.466	3.544	0.0793	3.5348	3.5443	6.4325	2853
Pilot_screen_BYxRM	haploid-R1	P3	C19	YBL024W	BY	Haploid	OK	3.404	3.512	0.0808	3.4778	3.5115	6.3328	419	3.426	3.49	0.0928	3.5146	3.4898	6.5564	5902
Pilot_screen_BYxRM	haploid-R1	P3	C19	YBL024W	RM	Haploid	OK	3.506	3.539	0.0287	3.5327	3.5389	6.0686	966	3.489	3.522	0.0439	3.5315	3.5222	6.3025	7936
Pilot_screen_BYxRM	haploid-R2	P9	F21,F22	YBL025W	BY	Haploid	Bad-mean	2.692	2.695	0.0311	2.7282	2.6951	4.7529	2057	2.74	2.725	0.0623	2.8113	2.7253	5.2038	20554
Pilot_screen_BYxRM	haploid-R2	P9	F21,F22	YBL025W	RM	Haploid	Bad-mean	2.561	2.585	0.036	2.5971	2.5847	4.3679	1629	2.583	2.603	0.0464	2.6298	2.6033	4.582	15455
Pilot_screen_BYxRM	haploid-R1	P9	E22	YBL025W	BY	Haploid	Bad-mean	2.954	2.942	0.0239	2.9909	2.9424	5.6366	677	2.988	2.962	0.0481	3.06	2.962	6.0864	6732
Pilot_screen_BYxRM	haploid-R1	P9	E22	YBL025W	RM	Haploid	Bad-count-mean	3.142	3.173	0.0548	3.2043	3.1725	5.8521	9	3.145	3.17	0.0461	3.1945	3.1705	5.7306	149
Pilot_screen_BYxRM	fillin	Haploid-fillin_P1	A22	YBL025W	BY	Haploid	NA	3.097	3.07	0.0365	3.1462	3.0698	5.8371	1377	3.082	3.04	0.0614	3.1612	3.0402	6.0257	12131
Pilot_screen_BYxRM	fillin	Haploid-fillin_P1	A22	YBL025W	RM	Haploid	NA	2.995	2.998	0.0202	3.0185	2.9983	5.1219	1494	2.961	2.962	0.035	3.0012	2.9623	5.3139	10579
Pilot_screen_BYxRM	haploid-R2	P9	F13,F14	YBL026W	BY	Haploid	OK	2.941	2.935	0.0641	3.0149	2.935	5.6611	757	2.981	2.945	0.1223	3.1199	2.9455	6.1149	7819
Pilot_screen_BYxRM	haploid-R2	P9	F13,F14	YBL026W	RM	Haploid	OK	2.912	2.9	0.0308	2.9471	2.8997	5.1647	1639	2.924	2.916	0.0503	2.9815	2.9161	5.471	15943
Pilot_screen_BYxRM	haploid-R1	P9	E14	YBL026W	BY	Haploid	OK	3.176	3.155	0.0394	3.2329	3.1554	6.4	601	3.209	3.187	0.0732	3.303	3.187	6.5278	6790
Pilot_screen_BYxRM	haploid-R1	P9	E14	YBL026W	RM	Haploid	OK	3.124	3.116	0.0306	3.1616	3.1159	5.6679	531	3.134	3.128	0.0496	3.1948	3.1284	5.9711	4440
Pilot_screen_BYxRM	haploid-R2	P6	J14	YBL027W	BY	Haploid	Bad-count	3.857	3.916	0.2266	4.0482	3.9158	7.9469	154	3.941	4.005	0.1889	4.0993	4.0045	7.9249	2002
Pilot_screen_BYxRM	haploid-R2	P6	J14	YBL027W	RM	Haploid	Bad-count	3.819	3.903	0.1676	3.9535	3.9032	7.6229	216	3.778	3.881	0.1804	3.932	3.8811	7.6759	1651
Pilot_screen_BYxRM	haploid-R1	P6	J14	YBL027W	BY	Haploid	OK	3.813	3.843	0.1664	3.9513	3.8431	7.5292	523	3.769	3.834	0.1925	3.9342	3.8342	7.5966	5505
Pilot_screen_BYxRM	haploid-R1	P6	J14	YBL027W	RM	Haploid	OK	3.853	3.867	0.1298	3.9644	3.8669	7.5343	298	3.787	3.879	0.1948	3.9487	3.8785	7.6228	2671
Pilot_screen_BYxRM	haploid-R2	P9	G10,G9	YBL028C	BY	Haploid	OK	3.31	3.358	0.0438	3.3459	3.358	5.6741	414	3.294	3.347	0.0618	3.3458	3.3467	5.8955	4185
Pilot_screen_BYxRM	haploid-R2	P9	G10,G9	YBL028C	RM	Haploid	OK	3.243	3.364	0.093	3.3174	3.364	5.9022	354	3.184	3.342	0.1554	3.3067	3.342	6.1166	3486
Pilot_screen_BYxRM	haploid-R1	P9	H9	YBL028C	BY	Haploid	OK	3.448	3.475	0.0266	3.4736	3.4752	5.9308	650	3.428	3.457	0.0377	3.4653	3.4574	6.0966	6886
Pilot_screen_BYxRM	haploid-R1	P9	H9	YBL028C	RM	Haploid	OK	3.474	3.509	0.0308	3.501	3.5087	5.9211	490	3.479	3.523	0.049	3.5218	3.5232	6.1926	4549
Pilot_screen_BYxRM	haploid-R2	P9	D23,D24	YBL029C-A	BY	Haploid	Bad-mean	3.055	3.087	0.0476	3.1082	3.0871	5.9007	1177	3.101	3.08	0.0987	3.2285	3.0796	6.4866	11807
Pilot_screen_BYxRM	haploid-R2	P9	D23,D24	YBL029C-A	RM	Haploid	Bad-mean	2.998	3.012	0.0324	3.0366	3.0115	5.6147	1804	3.012	3.024	0.0424	3.0598	3.0238	5.6601	17768
Pilot_screen_BYxRM	haploid-R1	P9	D24	YBL029C-A	BY	Haploid	Bad-mean	3.295	3.286	0.027	3.3253	3.2858	5.822	1597	3.306	3.286	0.0505	3.3716	3.2861	6.4382	15754
Pilot_screen_BYxRM	haploid-R1	P9	D24	YBL029C-A	RM	Haploid	Bad-count-mean	3.413	3.434	0.0818	3.4949	3.4338	6.4909	7	3.296	3.27	0.1329	3.4399	3.2697	6.728	242
Pilot_screen_BYxRM	fillin	Haploid-fillin_P1	A23	YBL029C-A	BY	Haploid	NA	3.433	3.397	0.0439	3.5018	3.3967	6.8731	998	3.402	3.341	0.0707	3.5089	3.341	7.0107	10603
Pilot_screen_BYxRM	fillin	Haploid-fillin_P1	A23	YBL029C-A	RM	Haploid	NA	3.261	3.263	0.0286	3.2951	3.2635	5.9022	473	3.206	3.205	0.0409	3.2543	3.2052	6.0022	3822
Pilot_screen_BYxRM	haploid-R2	P6	C23	YBL029W	BY	Haploid	Bad-count	3.048	3.047	0.0449	3.1037	3.0473	5.79	188	3.059	3.047	0.0591	3.1317	3.0475	6.0154	2620
Pilot_screen_BYxRM	haploid-R2	P6	C23	YBL029W	RM	Haploid	OK	2.875	2.891	0.0411	2.9206	2.8914	5.1824	593	2.899	2.9	0.0478	2.954	2.9005	5.4518	5009
Pilot_screen_BYxRM	haploid-R1	P6	C23	YBL029W	BY	Haploid	OK	2.903	2.9	0.0245	2.9341	2.9004	5.2209	911	2.935	2.906	0.0589	3.0202	2.9064	5.9518	9508
Pilot_screen_BYxRM	haploid-R1	P6	C23	YBL029W	RM	Haploid	OK	2.844	2.844	0.0251	2.8754	2.8439	5.0652	700	2.861	2.865	0.0441	2.9113	2.8653	5.298	6595
Pilot_screen_BYxRM	haploid-R2	P6	N17	YBL031W	BY	Haploid	Bad-count-var	2.903	2.912	0.0581	3.0859	2.9122	7.4895	247	2.961	2.951	0.0482	3.0244	2.9514	6.399	3434
Pilot_screen_BYxRM	haploid-R2	P6	N17	YBL031W	RM	Haploid	Bad-var	2.827	2.838	0.0704	2.9259	2.838	6.1048	318	2.859	2.866	0.0569	2.9353	2.866	6.0523	2227
Pilot_screen_BYxRM	haploid-R1	P6	N17	YBL031W	BY	Haploid	Bad-var	2.881	2.885	0.018	2.9019	2.8846	4.86	1001	2.889	2.887	0.0346	2.9334	2.8869	5.4314	10117
Pilot_screen_BYxRM	haploid-R1	P6	N17	YBL031W	RM	Haploid	Bad-var	2.839	2.84	0.0235	2.8679	2.8404	4.9633	316	2.871	2.872	0.0364	2.9166	2.8719	5.4339	2974
Pilot_screen_BYxRM	haploid-R2	P5	H06	YBL032W	BY	Haploid	OK	3.485	3.536	0.044	3.5224	3.5357	6.0799	285	3.475	3.525	0.0476	3.5169	3.5255	6.1599	2994
Pilot_screen_BYxRM	haploid-R2	P5	H06	YBL032W	RM	Haploid	Bad-count	3.37	3.436	0.0718	3.4308	3.4363	6.1143	237	3.384	3.462	0.0777	3.4536	3.4622	6.4014	2107
Pilot_screen_BYxRM	haploid-R1	P5	H6	YBL032W	BY	Haploid	OK	3.39	3.462	0.0525	3.4396	3.4617	6.0938	612	3.409	3.449	0.0635	3.4723	3.4489	6.3842	6894
Pilot_screen_BYxRM	haploid-R1	P5	H6	YBL032W	RM	Haploid	OK	3.411	3.442	0.0287	3.4386	3.4416	5.8763	453	3.398	3.434	0.0512	3.4469	3.4341	6.1541	3759
Pilot_screen_BYxRM	haploid-R2	P6	G06	YBL033C	BY	Haploid	OK	3.34	3.369	0.0344	3.3753	3.3693	5.9053	397	3.406	3.407	0.0516	3.4623	3.4066	6.3753	4829
Pilot_screen_BYxRM	haploid-R2	P6	G06	YBL033C	RM	Haploid	OK	3.307	3.343	0.0476	3.3507	3.3427	5.9055	661	3.32	3.349	0.0559	3.3753	3.3493	6.37	5468
Pilot_screen_BYxRM	haploid-R1	P6	G6	YBL033C	BY	Haploid	OK	3.247	3.254	0.016	3.2646	3.2535	5.4824	831	3.254	3.252	0.0366	3.298	3.2518	6.0592	8540
Pilot_screen_BYxRM	haploid-R1	P6	G6	YBL033C	RM	Haploid	OK	3.278	3.292	0.0137	3.2929	3.2919	5.3858	825	3.281	3.291	0.0253	3.3087	3.2906	5.7277	7958
Pilot_screen_BYxRM	haploid-R2	P1	K7,K8	YBL034C	BY	Haploid	OK	2.944	2.966	0.0515	2.9999	2.9662	5.6131	1237	3.002	2.999	0.0751	3.0891	2.9991	5.9717	12274
Pilot_screen_BYxRM	haploid-R2	P1	K7,K8	YBL034C	RM	Haploid	OK	3.008	3.005	0.0588	3.0758	3.0048	5.7875	413	3.01	3.015	0.0703	3.0882	3.0149	5.8224	3714
Pilot_screen_BYxRM	haploid-R1	P1	K7	YBL034C	BY	Haploid	Bad-count	3.021	2.968	0.0658	3.1124	2.9684	6.1017	150	3.108	3.081	0.0883	3.2149	3.0806	6.2704	2181
Pilot_screen_BYxRM	haploid-R1	P1	K7	YBL034C	RM	Haploid	OK	2.874	2.858	0.0498	2.9538	2.8581	5.8751	320	2.894	2.854	0.0732	3.0029	2.8544	6.0603	2533
Pilot_screen_BYxRM	fillin	Haploid-fillin_P1	A24	YBL034C	BY	Haploid	NA	3.14	3.09	0.054	3.213	3.0902	6.1399	176	3.109	3.07	0.0846	3.2112	3.0698	6.2044	2192
Pilot_screen_BYxRM	fillin	Haploid-fillin_P1	A24	YBL034C	RM	Haploid	NA	2.963	2.967	0.0191	2.9845	2.9671	4.9866	1131	2.9	2.905	0.0387	2.9432	2.905	5.2591	10010
Pilot_screen_BYxRM	haploid-R2	P2	B11,B12	YBL035C	BY	Haploid	OK	3.145	3.158	0.0229	3.1719	3.1577	5.5625	1846	3.193	3.18	0.0539	3.2593	3.1799	6.1685	18528
Pilot_screen_BYxRM	haploid-R2	P2	B11,B12	YBL035C	RM	Haploid	OK	3.122	3.14	0.0343	3.1579	3.1403	5.5544	1464	3.14	3.156	0.0434	3.1862	3.1557	5.6992	14141
Pilot_screen_BYxRM	haploid-R1	P2	B12	YBL035C	BY	Haploid	OK	3.077	3.071	0.0244	3.1092	3.0707	5.6149	658	3.114	3.098	0.0566	3.1833	3.0978	6.0204	7714
Pilot_screen_BYxRM	haploid-R1	P2	B12	YBL035C	RM	Haploid	OK	3.022	3.027	0.0165	3.0416	3.0272	5.0962	928	3.026	3.029	0.0343	3.0654	3.0293	5.4589	8080
Pilot_screen_BYxRM	haploid-R2	P7	C3,C4	YBL036C	BY	Haploid	Bad-var	3.06	3.069	0.0246	3.0882	3.0686	5.4548	1165	3.074	3.062	0.0494	3.1395	3.0621	6.1703	11640
Pilot_screen_BYxRM	haploid-R2	P7	C3,C4	YBL036C	RM	Haploid	Bad-var	3.007	3.021	0.0285	3.0476	3.0211	6.0973	1746	3.009	3.026	0.0396	3.0564	3.0257	5.9232	17247
Pilot_screen_BYxRM	haploid-R1	P7	D3	YBL036C	BY	Haploid	Bad-var	3.203	3.217	0.018	3.2231	3.2169	5.4205	544	3.207	3.194	0.0441	3.2629	3.1943	6.1629	5920
Pilot_screen_BYxRM	haploid-R1	P7	D3	YBL036C	RM	Haploid	Bad-var	3.177	3.182	0.0119	3.1909	3.1816	5.2022	403	3.193	3.193	0.0281	3.228	3.1933	6.0069	3589
Pilot_screen_BYxRM	haploid-R2	P1	L23,L24	YBL037W	BY	Haploid	OK	3.211	3.207	0.0322	3.2519	3.2068	5.9682	1255	3.234	3.219	0.0486	3.294	3.2195	6.2022	12649
Pilot_screen_BYxRM	haploid-R2	P1	L23,L24	YBL037W	RM	Haploid	OK	3.131	3.142	0.0215	3.154	3.1417	5.3139	1027	3.135	3.148	0.037	3.1746	3.148	5.6256	9688
Pilot_screen_BYxRM	haploid-R1	P1	L24	YBL037W	BY	Haploid	OK	3.101	3.113	0.0155	3.1193	3.1132	5.2287	537	3.137	3.122	0.0368	3.184	3.1218	5.9264	5334
Pilot_screen_BYxRM	haploid-R1	P1	L24	YBL037W	RM	Haploid	Bad-count	3.151	3.193	0.0094	3.1615	3.1934	4.924	8	3.221	3.228	0.0459	3.2733	3.2276	5.9794	105
Pilot_screen_BYxRM	haploid-R2	P8	C13,C14	YBL038W	BY	Haploid	OK	2.931	2.96	0.0373	2.9704	2.9602	5.2076	1270	2.954	2.948	0.0689	3.0316	2.9477	5.6972	12621
Pilot_screen_BYxRM	haploid-R2	P8	C13,C14	YBL038W	RM	Haploid	OK	2.869	2.874	0.02	2.8904	2.8744	4.7455	382	2.818	2.843	0.0481	2.8679	2.843	5.1011	3447
Pilot_screen_BYxRM	haploid-R1	P8	C13	YBL038W	BY	Haploid	OK	3.14	3.141	0.0134	3.1554	3.1414	5.194	955	3.141	3.128	0.0335	3.1822	3.1285	5.7783	9970
Pilot_screen_BYxRM	haploid-R1	P8	C13	YBL038W	RM	Haploid	OK	3.104	3.099	0.0166	3.1269	3.0995	5.6286	394	3.137	3.139	0.0337	3.1755	3.1395	5.6565	3526
Pilot_screen_BYxRM	haploid-R2	P3	J24	YBL039C	BY	Haploid	OK	3.848	3.933	0.102	3.924	3.9329	7.1225	299	3.843	3.945	0.1015	3.921	3.9449	7.1335	2939
Pilot_screen_BYxRM	haploid-R2	P3	J24	YBL039C	RM	Haploid	Bad-count	3.813	3.89	0.1055	3.8934	3.8897	7.1116	186	3.788	3.918	0.1515	3.8961	3.9175	7.1729	1946
Pilot_screen_BYxRM	haploid-R1	P3	J24	YBL039C	BY	Haploid	OK	3.66	3.798	0.1104	3.7528	3.7978	6.9033	257	3.644	3.733	0.1042	3.7361	3.7333	6.9573	3064
Pilot_screen_BYxRM	haploid-R1	P3	J24	YBL039C	RM	Haploid	OK	3.794	3.856	0.0659	3.8441	3.8561	6.7664	365	3.745	3.824	0.0965	3.8232	3.8241	7.0099	3109
Pilot_screen_BYxRM	fillin	Haploid-fillin_P1	B01	YBL039C	BY	Haploid	NA	3.787	3.913	0.1089	3.8771	3.9129	7.1501	1508	3.77	3.824	0.0747	3.8372	3.8243	7.0414	15696
Pilot_screen_BYxRM	fillin	Haploid-fillin_P1	B01	YBL039C	RM	Haploid	NA	3.898	3.936	0.0514	3.9386	3.9361	6.9445	991	3.845	3.886	0.0664	3.9017	3.8865	7.0813	7507
Pilot_screen_BYxRM	haploid-R2	P11	P3,P4	YBL040C	BY	Haploid	OK	3.235	3.286	0.0517	3.2801	3.2861	5.7237	853	3.234	3.269	0.066	3.2957	3.2691	5.9812	8610
Pilot_screen_BYxRM	haploid-R2	P11	P3,P4	YBL040C	RM	Haploid	OK	3.145	3.161	0.0347	3.1793	3.1613	5.52	882	3.165	3.18	0.0494	3.2129	3.1802	5.7392	8408
Pilot_screen_BYxRM	haploid-R1	P11	O4	YBL040C	BY	Haploid	OK	3.443	3.498	0.0409	3.4802	3.4976	6.0406	549	3.439	3.467	0.051	3.4921	3.4669	6.3809	5582
Pilot_screen_BYxRM	haploid-R1	P11	O4	YBL040C	RM	Haploid	OK	3.401	3.423	0.0306	3.4289	3.4229	5.8494	396	3.399	3.423	0.047	3.4522	3.4228	6.5959	3868
Pilot_screen_BYxRM	haploid-R2	P10	M23,M24	YBL042C	BY	Haploid	OK	3.282	3.472	0.1814	3.4187	3.472	6.3375	984	3.131	3.135	0.1743	3.2967	3.1351	6.3835	11143
Pilot_screen_BYxRM	haploid-R2	P10	M23,M24	YBL042C	RM	Haploid	OK	3.385	3.499	0.1132	3.4714	3.4995	6.269	1413	3.311	3.455	0.1625	3.4412	3.455	6.4392	13276
Pilot_screen_BYxRM	haploid-R1	P10	N23	YBL042C	BY	Haploid	OK	3.576	3.627	0.0465	3.6165	3.6269	6.3381	822	3.518	3.573	0.0653	3.5792	3.5725	6.5164	8101
Pilot_screen_BYxRM	haploid-R1	P10	N23	YBL042C	RM	Haploid	OK	3.682	3.752	0.0657	3.7347	3.7523	6.6295	441	3.622	3.697	0.094	3.7028	3.6974	6.8265	4265
Pilot_screen_BYxRM	fillin	Haploid-fillin_P1	B02	YBL042C	BY	Haploid	NA	3.58	3.695	0.0929	3.6685	3.6951	6.8135	778	3.549	3.595	0.0747	3.6229	3.5951	6.7126	8314
Pilot_screen_BYxRM	fillin	Haploid-fillin_P1	B02	YBL042C	RM	Haploid	NA	3.829	3.869	0.0487	3.8692	3.8686	6.8161	1752	3.755	3.796	0.0647	3.8124	3.7964	6.9242	14568
Pilot_screen_BYxRM	haploid-R2	P10	J10,J9	YBL045C	BY	Haploid	Bad-mean	3.114	3.201	0.1877	3.3098	3.2007	6.5558	1339	3.149	3.17	0.3223	3.4941	3.1696	7.2545	13922
Pilot_screen_BYxRM	haploid-R2	P10	J10,J9	YBL045C	RM	Haploid	Bad-mean	3.34	3.415	0.1244	3.4451	3.4146	6.4577	1267	3.306	3.397	0.1522	3.4388	3.3969	6.6051	11898
Pilot_screen_BYxRM	haploid-R1	P10	J10	YBL045C	BY	Haploid	Bad-mean	3.607	3.637	0.0823	3.6887	3.6371	6.9441	805	3.613	3.614	0.13	3.7579	3.6145	7.4685	8616
Pilot_screen_BYxRM	haploid-R1	P10	J10	YBL045C	RM	Haploid	Bad-mean	3.587	3.581	0.0682	3.6618	3.5811	6.9146	443	3.571	3.559	0.0969	3.6839	3.5594	7.257	3731
Pilot_screen_BYxRM	fillin	Haploid-fillin_P1	B03	YBL045C	BY	Haploid	NA	3.711	3.735	0.0787	3.7904	3.7347	7.1544	1441	3.698	3.676	0.0945	3.8124	3.6758	7.5219	13298
Pilot_screen_BYxRM	fillin	Haploid-fillin_P1	B03	YBL045C	RM	Haploid	NA	3.661	3.671	0.0408	3.7042	3.6709	6.6991	1313	3.609	3.619	0.055	3.668	3.6192	6.8369	10295
Pilot_screen_BYxRM	haploid-R2	P5	G05	YBL046W	BY	Haploid	Bad-var	3.036	3.047	0.0235	3.065	3.0471	5.5944	675	3.047	3.056	0.0312	3.1644	3.0558	7.8139	7017
Pilot_screen_BYxRM	haploid-R2	P5	G05	YBL046W	RM	Haploid	Bad-var	3.006	3.018	0.0301	3.0575	3.0176	6.2507	416	3.009	3.021	0.036	3.1196	3.0215	7.7306	3848
Pilot_screen_BYxRM	haploid-R1	P5	G5	YBL046W	BY	Haploid	Bad-var	3.055	3.054	0.0202	3.0811	3.054	5.453	609	3.086	3.064	0.0466	3.1498	3.0635	6.5834	7438
Pilot_screen_BYxRM	haploid-R1	P5	G5	YBL046W	RM	Haploid	Bad-var	3.023	3.03	0.0143	3.0391	3.0299	4.9578	842	3.035	3.038	0.0279	3.0787	3.038	7.0017	6930
Pilot_screen_BYxRM	haploid-R2	P1	L23,L24	YBL047C	BY	Haploid	OK	3.697	3.729	0.0331	3.7242	3.7287	6.3583	925	3.706	3.73	0.0423	3.7446	3.7301	6.6603	9324
Pilot_screen_BYxRM	haploid-R2	P1	L23,L24	YBL047C	RM	Haploid	OK	3.603	3.63	0.0309	3.6307	3.6304	6.2388	656	3.578	3.612	0.0497	3.6248	3.6122	6.5439	5848
Pilot_screen_BYxRM	haploid-R1	P1	K24	YBL047C	BY	Haploid	OK	3.569	3.629	0.0526	3.6153	3.6288	6.3885	346	3.561	3.613	0.0617	3.6164	3.6128	6.5301	3456
Pilot_screen_BYxRM	haploid-R1	P1	K24	YBL047C	RM	Haploid	Bad-count	3.374	3.403	0.0613	3.4426	3.4033	6.3831	9	3.529	3.554	0.1493	3.687	3.5543	7.2232	114
Pilot_screen_BYxRM	fillin	Haploid-fillin_P1	B04	YBL047C	BY	Haploid	NA	3.667	3.703	0.0441	3.7059	3.7034	6.5343	1038	3.655	3.68	0.0504	3.7024	3.6802	6.6686	9242
Pilot_screen_BYxRM	fillin	Haploid-fillin_P1	B04	YBL047C	RM	Haploid	NA	3.566	3.593	0.0326	3.5959	3.5929	6.1853	1627	3.532	3.559	0.0442	3.5733	3.5595	6.3733	12725
Pilot_screen_BYxRM	haploid-R2	P3	K09	YBL051C	BY	Haploid	OK	3.215	3.217	0.0118	3.228	3.2172	5.2579	755	3.229	3.235	0.014	3.2448	3.235	5.3856	6976
Pilot_screen_BYxRM	haploid-R2	P3	K09	YBL051C	RM	Haploid	OK	3.156	3.161	0.0171	3.1754	3.1612	5.2894	375	3.189	3.201	0.0196	3.2101	3.2012	5.4978	4363
Pilot_screen_BYxRM	haploid-R1	P3	K9	YBL051C	BY	Haploid	OK	3.182	3.198	0.0312	3.2177	3.1976	5.7241	258	3.233	3.216	0.0532	3.298	3.2161	6.436	3734
Pilot_screen_BYxRM	haploid-R1	P3	K9	YBL051C	RM	Haploid	OK	3.122	3.13	0.0114	3.1352	3.1305	5.035	849	3.115	3.121	0.0251	3.1439	3.1206	5.4884	7195
Pilot_screen_BYxRM	haploid-R2	P2	P17,P18	YBL052C	BY	Haploid	OK	3.147	3.134	0.0493	3.2086	3.1337	6.1467	1673	3.195	3.161	0.0978	3.3035	3.1612	6.3547	16920
Pilot_screen_BYxRM	haploid-R2	P2	P17,P18	YBL052C	RM	Haploid	OK	2.93	2.955	0.0369	2.9688	2.9547	5.2521	1098	2.934	2.953	0.0547	2.99	2.9533	5.4499	10195
Pilot_screen_BYxRM	haploid-R1	P2	O18	YBL052C	BY	Haploid	OK	3.064	3.049	0.0295	3.1069	3.0489	5.779	323	3.133	3.104	0.0562	3.2043	3.1037	6.1045	3494
Pilot_screen_BYxRM	haploid-R1	P2	O18	YBL052C	RM	Haploid	OK	2.921	2.928	0.0185	2.9415	2.9281	4.9047	421	2.92	2.919	0.037	2.9639	2.9192	5.3608	3912
Pilot_screen_BYxRM	haploid-R2	P4	A05	YBL054W	BY	Haploid	Bad-var	2.921	2.939	0.0253	2.9485	2.9395	5.0017	600	2.925	2.939	0.0325	2.9606	2.9387	5.1664	6344
Pilot_screen_BYxRM	haploid-R2	P4	A05	YBL054W	RM	Haploid	Bad-var	2.905	2.919	0.0302	2.9357	2.9192	4.9783	997	2.932	2.95	0.0381	2.9723	2.9499	5.418	9364
Pilot_screen_BYxRM	haploid-R1	P4	A5	YBL054W	BY	Haploid	Bad-var	3.021	3.023	0.023	3.0916	3.0233	7.2253	1056	3.02	3.016	0.0401	3.0714	3.0159	6.2577	12335
Pilot_screen_BYxRM	haploid-R1	P4	A5	YBL054W	RM	Haploid	Bad-var	3.019	3.026	0.0138	3.0345	3.0264	4.9135	1620	3.024	3.031	0.0298	3.0599	3.0309	6.0824	14445
Pilot_screen_BYxRM	haploid-R2	P5	M02	YBL055C	BY	Haploid	OK	2.981	2.994	0.0298	3.014	2.9938	5.2071	319	2.983	2.992	0.0329	3.018	2.9924	5.2744	3716
Pilot_screen_BYxRM	haploid-R2	P5	M02	YBL055C	RM	Haploid	OK	2.934	2.946	0.0292	2.9652	2.9464	5.0577	534	2.951	2.968	0.0388	2.993	2.9681	5.4096	4686
Pilot_screen_BYxRM	haploid-R1	P5	M2	YBL055C	BY	Haploid	OK	3.052	3.05	0.0252	3.0883	3.0497	5.733	684	3.1	3.065	0.0544	3.173	3.0652	6.1156	7680
Pilot_screen_BYxRM	haploid-R1	P5	M2	YBL055C	RM	Haploid	OK	3.022	3.026	0.0186	3.0445	3.0264	5.1953	665	3.045	3.044	0.0333	3.0843	3.0441	5.5993	5724
Pilot_screen_BYxRM	haploid-R2	P4	H16	YBL056W	BY	Haploid	OK	3.489	3.516	0.0316	3.5171	3.5162	6.0116	775	3.474	3.503	0.0385	3.5107	3.5029	6.2788	7718
Pilot_screen_BYxRM	haploid-R2	P4	H16	YBL056W	RM	Haploid	OK	3.388	3.424	0.0422	3.4249	3.4242	5.9367	266	3.395	3.436	0.053	3.4462	3.4356	6.4594	2618
Pilot_screen_BYxRM	haploid-R1	P4	H16	YBL056W	BY	Haploid	OK	3.349	3.408	0.0477	3.3953	3.4076	6.0265	346	3.368	3.402	0.0727	3.4489	3.4019	6.953	4491
Pilot_screen_BYxRM	haploid-R1	P4	H16	YBL056W	RM	Haploid	OK	3.336	3.354	0.0217	3.3566	3.3537	5.5946	652	3.315	3.335	0.0411	3.3572	3.3348	6.0656	5473
Pilot_screen_BYxRM	fillin	Haploid-fillin_P1	B05	YBL056W	BY	Haploid	NA	3.542	3.565	0.0292	3.5706	3.5648	6.1998	1544	3.519	3.516	0.0405	3.5635	3.5162	6.4709	13088
Pilot_screen_BYxRM	fillin	Haploid-fillin_P1	B05	YBL056W	RM	Haploid	NA	3.492	3.495	0.0167	3.5105	3.4954	5.9226	1326	3.461	3.465	0.0321	3.4955	3.4646	6.1772	9262
Pilot_screen_BYxRM	haploid-R2	P8	N11,N12	YBL057C	BY	Haploid	Bad-var	2.765	2.776	0.0276	2.7941	2.7766	4.7109	1559	2.811	2.799	0.0603	2.8797	2.7989	5.3316	15405
Pilot_screen_BYxRM	haploid-R2	P8	N11,N12	YBL057C	RM	Haploid	Bad-var	2.663	2.676	0.0268	2.6921	2.6757	4.4763	934	2.664	2.68	0.0506	2.7175	2.6799	4.8327	8650
Pilot_screen_BYxRM	haploid-R1	P8	M12	YBL057C	BY	Haploid	Bad-var	3.017	3.011	0.0223	3.0548	3.0108	6.1758	1029	3.041	3.013	0.0533	3.1306	3.013	7.0073	10236
Pilot_screen_BYxRM	haploid-R1	P8	M12	YBL057C	RM	Haploid	Bad-var	2.975	2.966	0.0243	3.0062	2.9662	5.3284	444	3.005	2.99	0.049	3.1	2.99	7.1351	4302
Pilot_screen_BYxRM	haploid-R2	P5	I08	YBL058W	BY	Haploid	OK	3.302	3.325	0.0271	3.329	3.3248	5.6922	487	3.295	3.319	0.0375	3.3404	3.3194	6.8562	5526
Pilot_screen_BYxRM	haploid-R2	P5	I08	YBL058W	RM	Haploid	OK	3.233	3.278	0.0418	3.2708	3.2784	5.6234	405	3.228	3.278	0.049	3.2773	3.2777	6.0763	3302
Pilot_screen_BYxRM	haploid-R1	P5	I8	YBL058W	BY	Haploid	OK	3.262	3.276	0.0308	3.2975	3.2764	5.8987	498	3.32	3.296	0.0682	3.3995	3.2957	6.4401	6590
Pilot_screen_BYxRM	haploid-R1	P5	I8	YBL058W	RM	Haploid	OK	3.269	3.285	0.0198	3.2897	3.2854	5.5205	719	3.25	3.268	0.0343	3.2858	3.268	5.7588	5585
Pilot_screen_BYxRM	haploid-R2	P9	D13,D14	YBL059C-A	BY	Haploid	Bad-count-var	2.702	2.708	0.0018	2.7044	2.7078	3.3227	7	2.774	2.748	0.068	2.8624	2.748	5.5949	65
Pilot_screen_BYxRM	haploid-R2	P9	D13,D14	YBL059C-A	RM	Haploid	Bad-count-var	2.57	2.631	0.0439	2.6155	2.6308	4.4499	15	2.589	2.608	0.0657	2.656	2.6084	4.7993	174
Pilot_screen_BYxRM	haploid-R1	P9	C14	YBL059C-A	BY	Haploid	Bad-count-var	3.417	3.073	0.4826	3.9728	3.0792	8.286	6	3.135	3.018	0.1885	3.5151	3.0176	7.7667	103
Pilot_screen_BYxRM	haploid-R1	P9	C14	YBL059C-A	RM	Haploid	Bad-count-var	3.065	2.921	0.115	3.2326	2.9224	6.5621	8	3.187	3.046	0.2054	3.5739	3.0461	7.806	55
Pilot_screen_BYxRM	haploid-R2	P8	H15,H16	YBL059W	BY	Haploid	OK	2.687	2.699	0.0271	2.7161	2.6989	4.6095	1982	2.732	2.72	0.0699	2.8097	2.7205	5.247	19658
Pilot_screen_BYxRM	haploid-R2	P8	H15,H16	YBL059W	RM	Haploid	OK	2.58	2.597	0.0279	2.6104	2.5975	4.3802	1099	2.57	2.59	0.0547	2.6259	2.5896	4.6559	10017
Pilot_screen_BYxRM	haploid-R1	P8	G16	YBL059W	BY	Haploid	OK	2.908	2.907	0.0233	2.9422	2.9069	5.5298	1109	2.963	2.927	0.0618	3.0459	2.9265	5.9017	11285
Pilot_screen_BYxRM	haploid-R1	P8	G16	YBL059W	RM	Haploid	OK	2.882	2.866	0.0304	2.9223	2.8659	5.3197	453	2.923	2.902	0.0538	2.9903	2.9025	5.6689	4326
Pilot_screen_BYxRM	haploid-R2	P3	K21	YBL060W	BY	Haploid	OK	2.88	2.895	0.0205	2.9021	2.8948	4.8167	717	2.901	2.913	0.0239	2.9352	2.9135	6.351	6982
Pilot_screen_BYxRM	haploid-R2	P3	K21	YBL060W	RM	Haploid	OK	2.833	2.84	0.0307	2.8708	2.8396	5.1508	329	2.861	2.878	0.0325	2.8963	2.878	5.0477	3535
Pilot_screen_BYxRM	haploid-R1	P3	K21	YBL060W	BY	Haploid	Bad-count	2.941	2.932	0.0255	2.9785	2.9323	5.5298	197	3.047	3.012	0.0632	3.1244	3.0123	5.9521	2640
Pilot_screen_BYxRM	haploid-R1	P3	K21	YBL060W	RM	Haploid	OK	2.881	2.888	0.0173	2.9016	2.888	4.8902	983	2.886	2.891	0.0314	2.9226	2.8909	5.1948	9104
Pilot_screen_BYxRM	haploid-R2	P10	D7,D8	YBL061C	BY	Haploid	OK	2.797	2.814	0.0269	2.8267	2.8136	4.7911	505	2.81	2.829	0.0728	2.8829	2.8294	5.2865	5181
Pilot_screen_BYxRM	haploid-R2	P10	D7,D8	YBL061C	RM	Haploid	OK	2.787	2.801	0.026	2.8148	2.8008	4.74	1697	2.774	2.795	0.047	2.8222	2.795	4.9594	16078
Pilot_screen_BYxRM	haploid-R1	P10	C8	YBL061C	BY	Haploid	OK	3.048	3.045	0.0165	3.0699	3.0454	5.419	735	3.072	3.048	0.048	3.1324	3.0481	5.8852	8539
Pilot_screen_BYxRM	haploid-R1	P10	C8	YBL061C	RM	Haploid	OK	3.055	3.059	0.0127	3.0695	3.0588	4.9565	760	3.083	3.082	0.0312	3.1186	3.0817	5.5181	6283
Pilot_screen_BYxRM	fillin	Haploid-fillin_P1	B06	YBL061C	BY	Haploid	NA	3.2	3.196	0.03	3.2367	3.1958	5.8015	747	3.16	3.141	0.053	3.2235	3.1413	6.0017	8474
Pilot_screen_BYxRM	fillin	Haploid-fillin_P1	B06	YBL061C	RM	Haploid	NA	3.155	3.16	0.0178	3.1751	3.1599	5.3073	1633	3.084	3.088	0.0357	3.1234	3.0884	5.5224	14202
Pilot_screen_BYxRM	haploid-R2	P1	G19,G20	YBL063W	BY	Haploid	OK	2.915	2.964	0.0685	2.9759	2.9644	5.3545	1609	2.937	2.978	0.0864	3.0233	2.978	6.3629	16065
Pilot_screen_BYxRM	haploid-R2	P1	G19,G20	YBL063W	RM	Haploid	OK	2.898	2.934	0.0668	2.9549	2.934	5.2504	1180	2.927	2.967	0.0843	3.0038	2.9672	5.5237	11314
Pilot_screen_BYxRM	haploid-R1	P1	H19	YBL063W	BY	Haploid	OK	2.918	2.924	0.0252	2.95	2.924	5.2794	661	2.967	2.927	0.0629	3.052	2.9271	5.9746	7355
Pilot_screen_BYxRM	haploid-R1	P1	H19	YBL063W	RM	Haploid	OK	2.861	2.861	0.0225	2.8866	2.8614	4.914	746	2.89	2.889	0.0412	2.9392	2.8886	5.4844	6655
Pilot_screen_BYxRM	haploid-R2	P7	E10,E9	YBL064C	BY	Haploid	OK	3.143	3.151	0.0299	3.1743	3.1507	5.5582	1175	3.176	3.164	0.0632	3.2612	3.164	6.4395	11638
Pilot_screen_BYxRM	haploid-R2	P7	E10,E9	YBL064C	RM	Haploid	OK	3.001	3.014	0.042	3.043	3.0142	5.3742	1482	3.03	3.037	0.051	3.0855	3.0372	5.6682	14664
Pilot_screen_BYxRM	haploid-R1	P7	F9	YBL064C	BY	Haploid	OK	3.395	3.412	0.0695	3.4757	3.4119	6.6392	283	3.471	3.425	0.1416	3.6556	3.4249	7.4682	3217
Pilot_screen_BYxRM	haploid-R1	P7	F9	YBL064C	RM	Haploid	OK	3.289	3.274	0.0401	3.3425	3.2736	6.3757	271	3.296	3.269	0.0569	3.3767	3.2689	6.6586	2291
Pilot_screen_BYxRM	haploid-R2	P3	G23	YBL067C	BY	Haploid	OK	2.817	2.829	0.035	2.863	2.8288	5.3795	290	2.849	2.854	0.036	2.892	2.8542	5.3343	2850
Pilot_screen_BYxRM	haploid-R2	P3	G23	YBL067C	RM	Haploid	Bad-count	2.788	2.806	0.0464	2.8455	2.8063	5.3111	196	2.824	2.832	0.0536	2.9204	2.8324	6.8	1984
Pilot_screen_BYxRM	haploid-R1	P3	G23	YBL067C	BY	Haploid	OK	2.907	2.911	0.0289	2.9568	2.911	5.8977	350	2.978	2.944	0.0656	3.0705	2.9444	6.1367	4602
Pilot_screen_BYxRM	haploid-R1	P3	G23	YBL067C	RM	Haploid	OK	2.801	2.81	0.0278	2.8427	2.8099	5.6515	1246	2.811	2.815	0.0422	2.8627	2.8146	5.3988	11331
Pilot_screen_BYxRM	haploid-R2	P6	M20	YBL068W	BY	Haploid	OK	3.277	3.314	0.0288	3.305	3.3137	5.6228	634	3.292	3.311	0.0295	3.323	3.3106	5.8012	7271
Pilot_screen_BYxRM	haploid-R2	P6	M20	YBL068W	RM	Haploid	OK	3.275	3.309	0.0324	3.3064	3.3093	5.6612	587	3.278	3.314	0.0415	3.3169	3.3141	5.8059	4879
Pilot_screen_BYxRM	haploid-R1	P6	M20	YBL068W	BY	Haploid	OK	3.17	3.185	0.018	3.1889	3.1847	5.284	922	3.157	3.167	0.0313	3.1938	3.1669	5.764	8894
Pilot_screen_BYxRM	haploid-R1	P6	M20	YBL068W	RM	Haploid	OK	3.188	3.194	0.0171	3.2065	3.1938	5.328	487	3.207	3.218	0.0285	3.238	3.2181	5.6117	5105
Pilot_screen_BYxRM	fillin	Haploid-fillin_P1	B07	YBL068W	BY	Haploid	NA	3.313	3.334	0.0286	3.3438	3.3342	5.7975	1111	3.289	3.29	0.0375	3.3308	3.2895	5.964	11167
Pilot_screen_BYxRM	fillin	Haploid-fillin_P1	B07	YBL068W	RM	Haploid	NA	3.353	3.372	0.0209	3.374	3.3718	5.6703	740	3.308	3.319	0.033	3.3422	3.3193	5.861	5547
Pilot_screen_BYxRM	haploid-R2	P11	O3,O4	YBL069W	BY	Haploid	Bad-count	2.599	2.579	0.0727	2.6924	2.5788	5.1798	59	2.745	2.727	0.0796	2.841	2.7272	5.447	945
Pilot_screen_BYxRM	haploid-R2	P11	O3,O4	YBL069W	RM	Haploid	Bad-count	2.587	2.619	0.0469	2.6373	2.6193	4.6617	69	2.627	2.665	0.0699	2.6952	2.6651	4.8515	659
Pilot_screen_BYxRM	haploid-R1	P11	O3	YBL069W	BY	Haploid	OK	2.985	2.991	0.0162	3.0025	2.991	4.95	667	3.023	2.998	0.0411	3.0763	2.9983	5.7162	7107
Pilot_screen_BYxRM	haploid-R1	P11	O3	YBL069W	RM	Haploid	OK	2.933	2.94	0.0164	2.9512	2.9402	4.8335	653	2.948	2.952	0.0311	2.9831	2.9524	5.2526	6034
Pilot_screen_BYxRM	fillin	Haploid-fillin_P1	B08	YBL069W	BY	Haploid	NA	3.156	3.148	0.0293	3.1916	3.1478	5.7077	942	3.137	3.108	0.0542	3.2034	3.1077	6.0035	10408
Pilot_screen_BYxRM	fillin	Haploid-fillin_P1	B08	YBL069W	RM	Haploid	NA	3.08	3.08	0.0183	3.1014	3.0803	5.206	1590	3.031	3.028	0.0364	3.0725	3.0278	5.4561	12521
Pilot_screen_BYxRM	haploid-R2	P9	H15,H16	YBL071W-A	BY	Haploid	OK	3.271	3.307	0.033	3.2999	3.3072	5.539	1459	3.274	3.304	0.0596	3.3268	3.304	5.9494	14412
Pilot_screen_BYxRM	haploid-R2	P9	H15,H16	YBL071W-A	RM	Haploid	OK	3.286	3.321	0.0373	3.3172	3.3207	5.6021	1613	3.274	3.312	0.064	3.3294	3.3117	5.9561	15744
Pilot_screen_BYxRM	haploid-R1	P9	H16	YBL071W-A	BY	Haploid	OK	3.455	3.481	0.0208	3.4749	3.4806	5.8111	813	3.446	3.456	0.0363	3.4843	3.4563	6.2138	8450
Pilot_screen_BYxRM	haploid-R1	P9	H16	YBL071W-A	RM	Haploid	OK	3.475	3.51	0.0302	3.5023	3.5099	5.939	442	3.474	3.514	0.0474	3.5182	3.5142	6.2292	4105
Pilot_screen_BYxRM	haploid-R2	P8	I17,I18	YBL072C	BY	Haploid	OK	3.693	3.976	0.3763	3.9599	3.9765	7.6759	1417	3.738	3.97	0.3175	3.9524	3.9697	7.5621	14145
Pilot_screen_BYxRM	haploid-R2	P8	I17,I18	YBL072C	RM	Haploid	OK	3.887	4.131	0.3351	4.0813	4.1315	7.5896	1296	3.763	4.077	0.4516	4.0461	4.0765	7.7803	11866
Pilot_screen_BYxRM	haploid-R1	P8	J17	YBL072C	BY	Haploid	OK	4.028	4.187	0.1919	4.148	4.1868	7.5993	952	3.963	4.136	0.2278	4.1203	4.1362	7.7984	10148
Pilot_screen_BYxRM	haploid-R1	P8	J17	YBL072C	RM	Haploid	OK	4.13	4.218	0.1189	4.2043	4.2184	7.5374	1025	4.069	4.197	0.177	4.1905	4.1968	7.829	9391
Pilot_screen_BYxRM	haploid-R2	P6	K20	YBL074C	BY	Haploid	OK	3.023	3.044	0.0273	3.0569	3.0439	5.6681	845	3.035	3.049	0.0321	3.0732	3.0487	5.7408	8560
Pilot_screen_BYxRM	haploid-R2	P6	K20	YBL074C	RM	Haploid	OK	2.936	2.963	0.0421	2.9794	2.9632	5.2225	425	2.951	2.976	0.0466	3.0013	2.9759	5.4411	3890
Pilot_screen_BYxRM	haploid-R1	P6	K20	YBL074C	BY	Haploid	OK	2.82	2.82	0.0316	2.8646	2.8203	5.4099	812	2.835	2.821	0.0538	2.9115	2.8206	5.7556	8153
Pilot_screen_BYxRM	haploid-R1	P6	K20	YBL074C	RM	Haploid	OK	2.752	2.762	0.0298	2.7866	2.7618	4.8572	664	2.768	2.776	0.0443	2.8196	2.776	5.1886	6540
Pilot_screen_BYxRM	fillin	Haploid-fillin_P1	B09	YBL074C	BY	Haploid	NA	3.15	3.149	0.0225	3.1766	3.1489	5.5131	1600	3.124	3.103	0.0425	3.176	3.1035	5.8463	13709
Pilot_screen_BYxRM	fillin	Haploid-fillin_P1	B09	YBL074C	RM	Haploid	NA	3.059	3.061	0.0187	3.0801	3.0611	5.1635	1222	3.023	3.025	0.0346	3.062	3.0249	5.419	8728
Pilot_screen_BYxRM	haploid-R2	P3	K22	YBL075C	BY	Haploid	OK	2.951	2.879	0.0978	3.178	2.8786	7.5585	455	2.969	2.912	0.1115	3.2173	2.9116	7.5422	4481
Pilot_screen_BYxRM	haploid-R2	P3	K22	YBL075C	RM	Haploid	OK	2.828	2.794	0.0932	2.9789	2.7939	6.3465	297	2.87	2.856	0.0922	3.0483	2.8561	7.1045	3087
Pilot_screen_BYxRM	haploid-R1	P3	K22	YBL075C	BY	Haploid	OK	3.315	3.076	0.3505	3.9049	3.0757	8.5156	326	3.563	3.204	0.6059	4.2347	3.2038	8.8755	4151
Pilot_screen_BYxRM	haploid-R1	P3	K22	YBL075C	RM	Haploid	OK	2.944	2.902	0.0509	3.0194	2.902	5.8808	700	2.943	2.908	0.0736	3.0697	2.9085	6.9862	6067
Pilot_screen_BYxRM	haploid-R2	P1	I10,I9	YBL076C	BY	Haploid	OK	4.147	4.181	0.0415	4.1759	4.1807	7.1981	980	4.107	4.153	0.0751	4.163	4.1526	7.5241	9821
Pilot_screen_BYxRM	haploid-R2	P1	I10,I9	YBL076C	RM	Haploid	OK	4.085	4.141	0.0716	4.134	4.141	7.3045	1477	4.059	4.127	0.1006	4.1317	4.1266	7.5538	14050
Pilot_screen_BYxRM	haploid-R1	P1	J9	YBL076C	BY	Haploid	OK	3.995	4.081	0.0922	4.0584	4.0811	7.2289	578	3.912	4.033	0.1303	4.011	4.0329	7.4286	5876
Pilot_screen_BYxRM	haploid-R1	P1	J9	YBL076C	RM	Haploid	OK	4.028	4.087	0.0678	4.0756	4.0874	7.1658	426	3.965	4.075	0.1262	4.0607	4.0748	7.508	4158
Pilot_screen_BYxRM	haploid-R2	P10	G21,G22	YBL079W	BY	Haploid	OK	2.948	2.964	0.017	2.965	2.9642	4.7603	1018	2.949	2.962	0.0374	2.9881	2.9617	5.218	10365
Pilot_screen_BYxRM	haploid-R2	P10	G21,G22	YBL079W	RM	Haploid	OK	2.929	2.94	0.0167	2.9465	2.9398	4.7577	1809	2.927	2.944	0.0304	2.9573	2.9444	5.0128	17210
Pilot_screen_BYxRM	haploid-R1	P10	G21	YBL079W	BY	Haploid	OK	3.149	3.155	0.0145	3.1655	3.1552	5.3226	882	3.17	3.154	0.0358	3.216	3.1536	5.9233	9489
Pilot_screen_BYxRM	haploid-R1	P10	G21	YBL079W	RM	Haploid	OK	3.14	3.149	0.0129	3.1543	3.1489	5.1169	634	3.159	3.16	0.0228	3.1869	3.16	5.7112	5559
Pilot_screen_BYxRM	haploid-R2	P4	M15	YBL080C	BY	Haploid	Bad-count	2.837	2.864	0.0212	2.8595	2.8639	4.681	78	2.843	2.854	0.0347	2.8816	2.8536	5.1959	734
Pilot_screen_BYxRM	haploid-R2	P4	M15	YBL080C	RM	Haploid	OK	2.726	2.739	0.0331	2.7667	2.7392	5.0302	250	2.732	2.747	0.0409	2.7777	2.7469	4.9596	2527
Pilot_screen_BYxRM	haploid-R1	P4	M15	YBL080C	BY	Haploid	OK	2.884	2.875	0.0288	2.9251	2.8754	5.4111	371	2.955	2.925	0.065	3.039	2.925	5.8738	4009
Pilot_screen_BYxRM	haploid-R1	P4	M15	YBL080C	RM	Haploid	OK	2.82	2.817	0.0359	2.8724	2.8166	5.5387	649	2.814	2.81	0.049	2.8792	2.8106	5.6016	6196
Pilot_screen_BYxRM	haploid-R2	P4	P02	YBL082C	BY	Haploid	OK	2.901	2.915	0.0293	2.9476	2.9149	5.9067	275	2.917	2.927	0.0312	2.9545	2.9272	5.4317	2619
Pilot_screen_BYxRM	haploid-R2	P4	P02	YBL082C	RM	Haploid	OK	2.789	2.826	0.0534	2.8348	2.8265	4.8723	441	2.819	2.841	0.0432	2.863	2.8415	5.0418	4657
Pilot_screen_BYxRM	haploid-R1	P4	P2	YBL082C	BY	Haploid	OK	2.907	2.913	0.0274	2.9522	2.9134	5.7941	371	2.935	2.917	0.0439	2.9944	2.9166	5.7446	3866
Pilot_screen_BYxRM	haploid-R1	P4	P2	YBL082C	RM	Haploid	OK	2.882	2.889	0.0192	2.9035	2.8889	4.7967	632	2.88	2.887	0.0302	2.9132	2.8872	5.0438	6176
Pilot_screen_BYxRM	fillin	Haploid-fillin_P1	B10	YBL082C	BY	Haploid	NA	3.11	3.1	0.0303	3.1474	3.1005	5.655	952	3.111	3.078	0.0641	3.1897	3.0785	6.0596	9422
Pilot_screen_BYxRM	fillin	Haploid-fillin_P1	B10	YBL082C	RM	Haploid	NA	3.047	3.045	0.018	3.0676	3.0453	5.1443	1846	3.003	3	0.0367	3.045	2.9997	5.4254	13338
Pilot_screen_BYxRM	haploid-R2	P2	C13,C14	YBL084C	BY	Haploid	OK	3.052	3.063	0.0282	3.0861	3.0628	5.5731	1922	3.109	3.087	0.067	3.1908	3.0871	6.1024	19148
Pilot_screen_BYxRM	haploid-R2	P2	C13,C14	YBL084C	RM	Haploid	OK	2.992	3.003	0.0333	3.0274	3.0035	5.2945	1313	3.003	3.018	0.047	3.0527	3.018	5.4983	12407
Pilot_screen_BYxRM	haploid-R1	P2	D13	YBL084C	BY	Haploid	OK	3.066	3.034	0.0391	3.1179	3.0341	5.7612	250	3.13	3.09	0.0671	3.2221	3.0904	6.5648	3352
Pilot_screen_BYxRM	haploid-R1	P2	D13	YBL084C	RM	Haploid	OK	2.97	2.97	0.0194	2.9985	2.9705	5.6656	779	2.977	2.976	0.037	3.0402	2.9759	6.4133	6910
Pilot_screen_BYxRM	haploid-R2	P1	B17,B18	YBL085W	BY	Haploid	OK	3.138	3.147	0.033	3.1723	3.1471	5.5533	1719	3.168	3.172	0.0477	3.221	3.1723	5.9066	17070
Pilot_screen_BYxRM	haploid-R2	P1	B17,B18	YBL085W	RM	Haploid	OK	3.145	3.152	0.0275	3.1789	3.1525	5.8656	1698	3.148	3.16	0.0488	3.2001	3.1597	5.8596	16663
Pilot_screen_BYxRM	haploid-R1	P1	B18	YBL085W	BY	Haploid	OK	3.067	3.064	0.0224	3.0967	3.0637	5.5353	1094	3.09	3.064	0.0498	3.1537	3.0643	5.9423	12568
Pilot_screen_BYxRM	haploid-R1	P1	B18	YBL085W	RM	Haploid	OK	3.035	3.038	0.0199	3.0582	3.0382	5.1836	1037	3.062	3.06	0.0363	3.1039	3.0605	5.5611	8645
Pilot_screen_BYxRM	haploid-R2	P4	D14	YBL086C	BY	Haploid	OK	2.927	2.936	0.0274	2.9589	2.9361	5.231	1187	2.938	2.944	0.0338	2.9778	2.9438	5.4476	11997
Pilot_screen_BYxRM	haploid-R2	P4	D14	YBL086C	RM	Haploid	OK	2.851	2.868	0.0316	2.8858	2.8678	5.0465	571	2.876	2.889	0.0388	2.9488	2.8891	7.0899	5194
Pilot_screen_BYxRM	haploid-R1	P4	D14	YBL086C	BY	Haploid	OK	3.04	3.037	0.0178	3.064	3.0368	5.4342	572	3.075	3.048	0.047	3.1359	3.0477	5.8738	6497
Pilot_screen_BYxRM	haploid-R1	P4	D14	YBL086C	RM	Haploid	OK	2.954	2.96	0.0125	2.968	2.9605	4.7512	628	2.966	2.963	0.028	2.9998	2.9634	5.2993	5513
Pilot_screen_BYxRM	fillin	Haploid-fillin_P1	B11	YBL086C	BY	Haploid	NA	3.113	3.105	0.0272	3.1486	3.1052	5.6651	1239	3.08	3.05	0.0508	3.1468	3.0503	5.951	12401
Pilot_screen_BYxRM	fillin	Haploid-fillin_P1	B11	YBL086C	RM	Haploid	NA	3.015	3.017	0.0171	3.0347	3.0165	5.0265	742	2.98	2.98	0.0324	3.0172	2.98	5.3351	5216
Pilot_screen_BYxRM	haploid-R2	P7	C19,C20	YBL087C	BY	Haploid	OK	3.208	3.302	0.0805	3.2725	3.3015	5.7692	2030	3.183	3.245	0.0752	3.25	3.2446	5.8551	20232
Pilot_screen_BYxRM	haploid-R2	P7	C19,C20	YBL087C	RM	Haploid	OK	3.272	3.338	0.0651	3.3233	3.338	5.7846	1861	3.24	3.301	0.0867	3.3134	3.3011	6.0009	17581
Pilot_screen_BYxRM	haploid-R1	P7	C19	YBL087C	BY	Haploid	OK	3.349	3.429	0.0629	3.4079	3.4289	6.1909	473	3.333	3.374	0.0609	3.3943	3.3739	6.2271	5395
Pilot_screen_BYxRM	haploid-R1	P7	C19	YBL087C	RM	Haploid	OK	3.477	3.501	0.0261	3.5018	3.5008	5.9862	424	3.461	3.481	0.0438	3.5042	3.4815	6.276	3585
Pilot_screen_BYxRM	haploid-R2	P8	J11,J12	YBL090W	BY	Haploid	OK	2.592	2.606	0.033	2.628	2.6058	4.5205	1336	2.633	2.626	0.0751	2.7161	2.6257	5.0997	13308
Pilot_screen_BYxRM	haploid-R2	P8	J11,J12	YBL090W	RM	Haploid	OK	2.544	2.556	0.031	2.578	2.5564	4.4	1209	2.538	2.56	0.0558	2.5935	2.5601	4.5885	11092
Pilot_screen_BYxRM	haploid-R1	P8	J12	YBL090W	BY	Haploid	OK	2.899	2.893	0.0189	2.9245	2.8931	5.1967	735	2.951	2.906	0.0653	3.0402	2.9058	5.9526	7758
Pilot_screen_BYxRM	haploid-R1	P8	J12	YBL090W	RM	Haploid	OK	2.855	2.856	0.0239	2.8859	2.8556	5.1313	569	2.874	2.869	0.0468	2.9315	2.8689	5.5054	5140
Pilot_screen_BYxRM	haploid-R2	P5	E06	YBL091C	BY	Haploid	OK	3.013	3.032	0.0242	3.0388	3.032	5.1209	546	3.016	3.025	0.0254	3.0445	3.0253	5.2739	5691
Pilot_screen_BYxRM	haploid-R2	P5	E06	YBL091C	RM	Haploid	OK	2.97	2.977	0.0259	3.0004	2.9774	5.3583	644	2.981	2.998	0.0317	3.0128	2.9983	5.1864	6065
Pilot_screen_BYxRM	haploid-R1	P5	E6	YBL091C	BY	Haploid	OK	3.06	3.053	0.0275	3.1005	3.0532	5.8156	657	3.125	3.091	0.0628	3.2041	3.0911	6.1323	8155
Pilot_screen_BYxRM	haploid-R1	P5	E6	YBL091C	RM	Haploid	OK	3.008	3.013	0.0144	3.0242	3.0134	4.965	1456	3.014	3.013	0.032	3.051	3.013	5.3842	12918
Pilot_screen_BYxRM	fillin	Haploid-fillin_P1	B12	YBL091C	BY	Haploid	NA	3.184	3.177	0.023	3.212	3.1775	5.6148	1228	3.166	3.142	0.0465	3.2225	3.1422	5.9668	11754
Pilot_screen_BYxRM	fillin	Haploid-fillin_P1	B12	YBL091C	RM	Haploid	NA	3.11	3.105	0.015	3.1269	3.1051	5.1673	1536	3.071	3.069	0.0341	3.1096	3.0694	5.5017	11409
Pilot_screen_BYxRM	haploid-R2	P8	F21,F22	YBL093C	BY	Haploid	OK	2.879	2.896	0.0188	2.8994	2.8965	4.7473	508	2.863	2.877	0.0585	2.929	2.8767	5.4385	5055
Pilot_screen_BYxRM	haploid-R2	P8	F21,F22	YBL093C	RM	Haploid	Bad-count	2.69	2.714	0.0321	2.7241	2.7141	4.6242	152	2.679	2.702	0.0829	2.7663	2.7024	5.2258	1513
Pilot_screen_BYxRM	haploid-R1	P8	E22	YBL093C	BY	Haploid	OK	3.08	3.083	0.0192	3.1105	3.0832	5.9481	535	3.096	3.085	0.038	3.1459	3.0846	5.9486	5513
Pilot_screen_BYxRM	haploid-R1	P8	E22	YBL093C	RM	Haploid	OK	3.053	3.059	0.0146	3.0691	3.059	4.9904	428	3.073	3.075	0.0333	3.1142	3.0755	5.848	4092
Pilot_screen_BYxRM	haploid-R2	P7	O17,O18	YBL095W	BY	Haploid	Bad-var	2.587	2.601	0.0273	2.615	2.6014	4.3292	1104	2.595	2.611	0.0381	2.6355	2.6108	4.5793	10823
Pilot_screen_BYxRM	haploid-R2	P7	O17,O18	YBL095W	RM	Haploid	Bad-var	2.595	2.644	0.0714	2.6567	2.6441	4.6452	1060	2.597	2.648	0.0844	2.6707	2.6482	4.7955	10328
Pilot_screen_BYxRM	haploid-R1	P7	P17	YBL095W	BY	Haploid	Bad-var	2.857	2.866	0.0239	2.9244	2.8659	6.6344	487	2.866	2.864	0.0307	2.9147	2.8641	6.1113	4683
Pilot_screen_BYxRM	haploid-R1	P7	P17	YBL095W	RM	Haploid	Bad-count-var	2.816	2.823	0.0201	2.8388	2.8226	4.6761	142	2.844	2.854	0.0297	2.8777	2.8544	5.0009	1561
Pilot_screen_BYxRM	haploid-R2	P2	L21,L22	YBL097W	BY	Haploid	Bad-var	3.231	3.172	0.0665	3.3097	3.172	6.2577	1391	3.291	3.292	0.0868	3.3872	3.2919	6.4911	13929
Pilot_screen_BYxRM	haploid-R2	P2	L21,L22	YBL097W	RM	Haploid	Bad-var	3.014	3.032	0.0285	3.0441	3.0319	5.2315	902	3.012	3.03	0.0501	3.0658	3.0305	5.7163	8358
Pilot_screen_BYxRM	haploid-R1	P2	L22	YBL097W	BY	Haploid	Bad-var	3.05	3.034	0.0248	3.0858	3.0341	5.6704	374	3.113	3.068	0.0677	3.2257	3.0684	7.1723	4381
Pilot_screen_BYxRM	haploid-R1	P2	L22	YBL097W	RM	Haploid	Bad-var	2.975	2.965	0.0418	3.1453	2.9653	7.4323	559	2.979	2.963	0.0651	3.2133	2.9634	7.7099	4847
Pilot_screen_BYxRM	haploid-R2	P4	J06	YBL098W	BY	Haploid	OK	2.908	2.923	0.0257	2.9376	2.9235	5.1486	1106	2.939	2.945	0.0313	2.9759	2.9453	5.4283	10841
Pilot_screen_BYxRM	haploid-R2	P4	J06	YBL098W	RM	Haploid	OK	2.869	2.886	0.0301	2.904	2.8859	5.1626	268	2.904	2.907	0.0477	2.9848	2.9075	6.51	2798
Pilot_screen_BYxRM	haploid-R1	P4	J6	YBL098W	BY	Haploid	OK	2.908	2.921	0.0223	2.9352	2.9205	5.1411	620	2.946	2.933	0.0435	2.9991	2.9328	5.5483	6869
Pilot_screen_BYxRM	haploid-R1	P4	J6	YBL098W	RM	Haploid	OK	2.876	2.892	0.0218	2.9005	2.892	4.8458	632	2.878	2.882	0.0372	2.9318	2.8817	6.5752	5649
Pilot_screen_BYxRM	fillin	Haploid-fillin_P1	B13	YBL098W	BY	Haploid	NA	3.084	3.077	0.0231	3.1127	3.0773	5.4998	1591	3.068	3.046	0.0479	3.1275	3.0459	5.8213	13334
Pilot_screen_BYxRM	fillin	Haploid-fillin_P1	B13	YBL098W	RM	Haploid	NA	3.044	3.048	0.0183	3.0651	3.0479	5.1415	994	3.006	3.006	0.0352	3.0455	3.0059	5.3936	7288
Pilot_screen_BYxRM	haploid-R2	P10	O3,O4	YBL099W	BY	Haploid	OK	3.848	3.942	0.149	3.9389	3.9417	7.1335	1446	3.825	3.946	0.2381	3.9934	3.9461	7.753	13483
Pilot_screen_BYxRM	haploid-R2	P10	O3,O4	YBL099W	RM	Haploid	OK	3.754	3.889	0.1984	3.888	3.8885	7.2627	1455	3.673	3.859	0.2943	3.8831	3.8593	7.5707	13603
Pilot_screen_BYxRM	haploid-R1	P10	P3	YBL099W	BY	Haploid	OK	4.045	4.091	0.0755	4.1037	4.0909	7.4597	950	4.02	4.084	0.1413	4.1405	4.0839	8.0228	9458
Pilot_screen_BYxRM	haploid-R1	P10	P3	YBL099W	RM	Haploid	OK	4.044	4.11	0.1036	4.1244	4.1102	7.6169	267	4.031	4.11	0.1597	4.1643	4.1096	8.0952	2707
Pilot_screen_BYxRM	haploid-R2	P1	C21,C22	YBL101C	BY	Haploid	OK	3.172	3.185	0.0314	3.2066	3.1851	5.7361	1653	3.194	3.197	0.0487	3.2502	3.1969	6.073	16423
Pilot_screen_BYxRM	haploid-R2	P1	C21,C22	YBL101C	RM	Haploid	OK	3.092	3.109	0.0262	3.1204	3.1088	5.416	1787	3.1	3.114	0.0431	3.1448	3.1143	5.6079	17390
Pilot_screen_BYxRM	haploid-R1	P1	D21	YBL101C	BY	Haploid	OK	3.051	3.055	0.019	3.0768	3.0551	5.5294	845	3.083	3.057	0.0458	3.1441	3.0571	5.9589	10072
Pilot_screen_BYxRM	haploid-R1	P1	D21	YBL101C	RM	Haploid	OK	3.005	3.01	0.016	3.0259	3.01	5.33	1235	3.013	3.013	0.0281	3.0473	3.013	5.4658	10725
Pilot_screen_BYxRM	haploid-R2	P11	K17,K18	YBL102W	BY	Haploid	OK	2.858	2.868	0.0249	2.8854	2.8681	4.8824	1936	2.9	2.882	0.0593	2.9705	2.8821	5.5782	19141
Pilot_screen_BYxRM	haploid-R2	P11	K17,K18	YBL102W	RM	Haploid	OK	2.875	2.888	0.0301	2.9068	2.888	4.9504	855	2.905	2.915	0.0313	2.9398	2.9154	5.0785	8055
Pilot_screen_BYxRM	haploid-R1	P11	L17	YBL102W	BY	Haploid	OK	3.137	3.139	0.011	3.1496	3.1386	5.1458	515	3.148	3.129	0.0326	3.19	3.1291	5.835	5494
Pilot_screen_BYxRM	haploid-R1	P11	L17	YBL102W	RM	Haploid	OK	3.073	3.082	0.0123	3.0876	3.0816	5.0839	514	3.079	3.084	0.0247	3.1083	3.0836	5.4047	4765
Pilot_screen_BYxRM	fillin	Haploid-fillin_P1	B14	YBL102W	BY	Haploid	NA	3.242	3.241	0.0239	3.2707	3.241	5.7641	1503	3.241	3.218	0.0444	3.2953	3.2178	6.098	12761
Pilot_screen_BYxRM	fillin	Haploid-fillin_P1	B14	YBL102W	RM	Haploid	NA	3.171	3.171	0.0158	3.1887	3.1711	5.3185	1552	3.135	3.133	0.031	3.1699	3.1331	5.5839	10283
Pilot_screen_BYxRM	haploid-R2	P4	L09	YBL103C	BY	Haploid	Bad-var	3	3.02	0.0208	3.0239	3.0197	5.1706	391	3.012	3.016	0.0282	3.0474	3.0163	5.6356	4036
Pilot_screen_BYxRM	haploid-R2	P4	L09	YBL103C	RM	Haploid	Bad-var	2.878	2.903	0.0413	2.9164	2.9027	5.1358	531	2.892	2.91	0.0424	2.9377	2.9105	5.3946	5184
Pilot_screen_BYxRM	haploid-R1	P4	L9	YBL103C	BY	Haploid	Bad-count-var	3.143	3.065	0.0947	3.2583	3.0812	6.2889	14	3.273	3.306	0.0737	3.3503	3.306	6.2175	349
Pilot_screen_BYxRM	haploid-R1	P4	L9	YBL103C	RM	Haploid	Bad-var	2.941	2.934	0.0197	2.9672	2.9338	5.2258	565	2.946	2.944	0.0307	2.9839	2.9436	5.3446	5422
Pilot_screen_BYxRM	haploid-R2	P1	F3,F4	YBL104C	BY	Haploid	OK	3.129	3.151	0.0521	3.1781	3.1509	5.6906	536	3.146	3.179	0.0656	3.209	3.1787	5.9296	5389
Pilot_screen_BYxRM	haploid-R2	P1	F3,F4	YBL104C	RM	Haploid	OK	3.111	3.121	0.0272	3.1402	3.1208	5.4168	1576	3.119	3.133	0.0424	3.1643	3.1334	5.7617	15254
Pilot_screen_BYxRM	haploid-R1	P1	F4	YBL104C	BY	Haploid	OK	3.021	3.023	0.0189	3.0467	3.023	5.5193	757	3.064	3.04	0.043	3.1179	3.0398	5.7863	8158
Pilot_screen_BYxRM	haploid-R1	P1	F4	YBL104C	RM	Haploid	OK	3.007	3.008	0.0133	3.0229	3.0083	4.9769	546	2.998	2.997	0.0288	3.031	2.9973	5.3047	4752
Pilot_screen_BYxRM	haploid-R2	P1	D3,D4	YBL105C	BY	Haploid	OK	3.247	3.256	0.0189	3.268	3.2562	5.5641	1928	3.268	3.27	0.0261	3.2983	3.2699	5.8078	19272
Pilot_screen_BYxRM	haploid-R2	P1	D3,D4	YBL105C	RM	Haploid	OK	3.183	3.19	0.0203	3.2056	3.1899	5.4823	1959	3.185	3.194	0.0308	3.2193	3.1935	5.6865	18778
Pilot_screen_BYxRM	haploid-R1	P1	C4	YBL105C	BY	Haploid	OK	3.165	3.166	0.0142	3.1831	3.1657	5.4675	1275	3.176	3.164	0.0292	3.2125	3.1639	5.8338	13649
Pilot_screen_BYxRM	haploid-R1	P1	C4	YBL105C	RM	Haploid	OK	3.136	3.138	0.0115	3.1496	3.1385	5.1807	834	3.143	3.148	0.0204	3.1667	3.148	5.3985	7416
Pilot_screen_BYxRM	haploid-R2	P8	A11,A12	YBL107C	BY	Haploid	OK	2.73	2.742	0.0253	2.7593	2.7419	4.7128	1706	2.77	2.761	0.0514	2.8288	2.7607	5.1572	17026
Pilot_screen_BYxRM	haploid-R2	P8	A11,A12	YBL107C	RM	Haploid	OK	2.607	2.631	0.0278	2.6351	2.6309	4.3228	1913	2.614	2.635	0.0475	2.6611	2.635	4.6183	18426
Pilot_screen_BYxRM	haploid-R1	P8	B11	YBL107C	BY	Haploid	OK	2.923	2.925	0.0188	2.9475	2.9255	5.1492	1427	2.937	2.918	0.0508	3.0028	2.9177	5.7022	14945
Pilot_screen_BYxRM	haploid-R1	P8	B11	YBL107C	RM	Haploid	OK	2.893	2.897	0.0205	2.9166	2.897	4.9666	1031	2.922	2.919	0.0419	2.97	2.9187	5.3598	9475
Pilot_screen_BYxRM	haploid-R2	P2	P5,P6	YBL111C	BY	Haploid	OK	3.147	3.15	0.0278	3.1825	3.1496	5.8315	1291	3.168	3.16	0.0503	3.2291	3.1603	6.0722	12765
Pilot_screen_BYxRM	haploid-R2	P2	P5,P6	YBL111C	RM	Haploid	OK	3.048	3.065	0.0296	3.079	3.0651	5.2936	721	3.041	3.062	0.0521	3.0928	3.0616	5.5664	6729
Pilot_screen_BYxRM	haploid-R1	P2	P6	YBL111C	BY	Haploid	Bad-count	3.213	3.178	0.0507	3.2764	3.1784	6.1339	98	3.27	3.259	0.0649	3.3437	3.2586	6.2536	1517
Pilot_screen_BYxRM	haploid-R1	P2	P6	YBL111C	RM	Haploid	OK	2.983	2.991	0.0139	2.9988	2.9907	4.8909	368	3	2.994	0.0305	3.0398	2.9943	5.6306	3081
Pilot_screen_BYxRM	fillin	Haploid-fillin_P1	B15	YBL111C	BY	Haploid	NA	3.064	3.063	0.0172	3.0853	3.0627	5.3533	1862	3.103	3.085	0.0391	3.1527	3.0851	5.8401	10805
Pilot_screen_BYxRM	fillin	Haploid-fillin_P1	B15	YBL111C	RM	Haploid	NA	2.966	2.975	0.0191	2.9885	2.9755	5.0565	982	2.996	2.999	0.0326	3.0336	2.9992	5.3508	5074
Pilot_screen_BYxRM	haploid-R2	P2	A23,A24	YBR001C	BY	Haploid	OK	3.128	3.116	0.0528	3.195	3.1161	6.1041	1658	3.177	3.145	0.1016	3.2948	3.1445	6.4237	16846
Pilot_screen_BYxRM	haploid-R2	P2	A23,A24	YBR001C	RM	Haploid	OK	2.986	3.008	0.0373	3.0246	3.0078	5.2947	1814	2.988	3.008	0.0589	3.0484	3.0083	5.565	17035
Pilot_screen_BYxRM	haploid-R1	P2	B23	YBR001C	BY	Haploid	OK	3.023	3.001	0.0376	3.0797	3.0009	5.9365	741	3.102	3.057	0.0855	3.2082	3.0574	6.2423	9132
Pilot_screen_BYxRM	haploid-R1	P2	B23	YBR001C	RM	Haploid	OK	2.945	2.953	0.0225	2.9718	2.9533	5.1329	1165	2.941	2.945	0.0428	2.9895	2.9449	5.4026	9813
Pilot_screen_BYxRM	haploid-R2	P11	P11,P12	YBR002C	BY	Haploid	Bad-count-mean-var	2.703	2.681	0.0301	2.7374	2.6812	4.6769	17	2.938	2.956	0.0802	3.0231	2.9561	5.6192	372
Pilot_screen_BYxRM	haploid-R2	P11	P11,P12	YBR002C	RM	Haploid	Bad-count-mean-var	3.115	3.123	0.0085	3.1234	3.1235	4.7724	230	3.082	3.116	0.0383	3.1145	3.1163	5.2403	2211
Pilot_screen_BYxRM	haploid-R1	P11	O12	YBR002C	BY	Haploid	Bad-count-mean-var	3.382	3.324	0.078	3.487	3.3235	6.8124	25	3.357	3.344	0.0646	3.4325	3.3439	6.4784	271
Pilot_screen_BYxRM	haploid-R1	P11	O12	YBR002C	RM	Haploid	Bad-count-mean-var	3.289	3.283	0.0261	3.3223	3.2827	5.9501	14	3.229	3.231	0.0595	3.2969	3.2306	6.1535	139
Pilot_screen_BYxRM	haploid-R2	P10	P11,P12	YBR003W	BY	Haploid	OK	2.699	2.705	0.032	2.7346	2.7048	4.7012	524	2.695	2.709	0.0636	2.7637	2.7088	5.0697	5651
Pilot_screen_BYxRM	haploid-R2	P10	P11,P12	YBR003W	RM	Haploid	OK	2.715	2.73	0.0447	2.7608	2.7305	4.8023	1132	2.723	2.748	0.0568	2.7803	2.748	5.003	10743
Pilot_screen_BYxRM	haploid-R1	P10	P12	YBR003W	BY	Haploid	OK	3.106	3.107	0.0151	3.1245	3.1071	5.329	353	3.124	3.107	0.0429	3.1806	3.1071	5.983	3519
Pilot_screen_BYxRM	haploid-R1	P10	P12	YBR003W	RM	Haploid	Bad-count	3.033	3.031	0.0246	3.0619	3.0309	5.3414	121	3.052	3.057	0.0441	3.1014	3.0571	5.6437	1133
Pilot_screen_BYxRM	haploid-R2	P8	P10,P9	YBR005W	BY	Haploid	OK	2.846	2.831	0.0329	2.8857	2.8315	5.1082	1583	2.831	2.835	0.0826	2.9201	2.8354	5.4989	15797
Pilot_screen_BYxRM	haploid-R2	P8	P10,P9	YBR005W	RM	Haploid	OK	2.752	2.747	0.0372	2.7953	2.7474	4.9958	446	2.716	2.726	0.075	2.7991	2.7263	5.2949	4466
Pilot_screen_BYxRM	haploid-R1	P8	O10	YBR005W	BY	Haploid	OK	3.082	3.06	0.0347	3.1308	3.0605	5.8972	750	3.121	3.092	0.066	3.2026	3.0921	6.1103	7971
Pilot_screen_BYxRM	haploid-R1	P8	O10	YBR005W	RM	Haploid	OK	3.101	3.099	0.0251	3.1308	3.0995	5.4716	283	3.131	3.125	0.0544	3.193	3.1246	5.9357	2355
Pilot_screen_BYxRM	haploid-R2	P4	F21	YBR006W	BY	Haploid	Bad-count	3.014	3.005	0.0852	3.114	3.0052	6.0237	198	3.105	3.067	0.1029	3.2536	3.0669	7.2794	2496
Pilot_screen_BYxRM	haploid-R2	P4	F21	YBR006W	RM	Haploid	OK	2.902	2.908	0.0496	2.9957	2.9083	6.5888	319	2.904	2.9	0.0592	3.0192	2.9005	7.0641	2621
Pilot_screen_BYxRM	haploid-R1	P4	F21	YBR006W	BY	Haploid	OK	3.263	3.151	0.1038	3.4016	3.1506	6.7951	266	3.292	3.204	0.1728	3.4943	3.2037	7.0648	2666
Pilot_screen_BYxRM	haploid-R1	P4	F21	YBR006W	RM	Haploid	Bad-count	3.059	3.055	0.0544	3.1271	3.0551	6.009	133	3.048	3.011	0.0717	3.1468	3.0108	6.2783	1324
Pilot_screen_BYxRM	haploid-R2	P2	O1,O2	YBR007C	BY	Haploid	OK	3.056	3.061	0.0236	3.0856	3.0609	5.5298	656	3.135	3.103	0.0702	3.2219	3.1026	6.1973	6726
Pilot_screen_BYxRM	haploid-R2	P2	O1,O2	YBR007C	RM	Haploid	OK	3.092	3.113	0.0301	3.1222	3.1129	5.3757	1127	3.069	3.092	0.0522	3.1215	3.0921	5.6273	10437
Pilot_screen_BYxRM	haploid-R1	P2	P1	YBR007C	BY	Haploid	Bad-count	3.11	3.046	0.0513	3.1777	3.0458	6.0004	209	3.233	3.238	0.0856	3.3283	3.2385	6.3524	2922
Pilot_screen_BYxRM	haploid-R1	P2	P1	YBR007C	RM	Haploid	OK	2.976	2.985	0.0203	3.0003	2.9853	5.1658	495	2.973	2.963	0.0389	3.0203	2.9634	5.5076	4056
Pilot_screen_BYxRM	haploid-R2	P10	K5,K6	YBR008C	BY	Haploid	OK	2.543	2.544	0.0544	2.6018	2.5437	4.7478	892	2.706	2.712	0.0989	2.8071	2.7123	5.2984	10007
Pilot_screen_BYxRM	haploid-R2	P10	K5,K6	YBR008C	RM	Haploid	OK	2.561	2.59	0.0722	2.6301	2.5901	4.7265	2344	2.568	2.6	0.0729	2.6373	2.5999	4.7575	22340
Pilot_screen_BYxRM	haploid-R1	P10	L5	YBR008C	BY	Haploid	OK	2.916	2.9	0.0364	2.9675	2.9004	5.6029	659	2.984	2.932	0.0823	3.0886	2.9318	6.0224	7487
Pilot_screen_BYxRM	haploid-R1	P10	L5	YBR008C	RM	Haploid	OK	2.856	2.855	0.031	2.8967	2.855	5.273	631	2.877	2.864	0.0565	2.9484	2.8638	5.6097	5222
Pilot_screen_BYxRM	fillin	Haploid-fillin_P1	B16	YBR008C	BY	Haploid	NA	3.074	3.044	0.0505	3.1421	3.0439	6.0622	885	3.06	3.011	0.0942	3.174	3.0111	6.1679	10121
Pilot_screen_BYxRM	fillin	Haploid-fillin_P1	B16	YBR008C	RM	Haploid	NA	2.927	2.932	0.0198	2.9501	2.9325	4.9852	1161	2.896	2.899	0.0449	2.9468	2.8994	5.3326	8281
Pilot_screen_BYxRM	haploid-R2	P9	G5,G6	YBR009C	BY	Haploid	OK	3.602	3.686	0.1136	3.6859	3.6863	6.6937	658	3.571	3.67	0.1344	3.6702	3.6699	6.7657	6356
Pilot_screen_BYxRM	haploid-R2	P9	G5,G6	YBR009C	RM	Haploid	OK	3.651	3.718	0.1155	3.7343	3.7179	6.7827	658	3.636	3.712	0.1434	3.7388	3.7124	6.9166	6521
Pilot_screen_BYxRM	haploid-R1	P9	H5	YBR009C	BY	Haploid	OK	3.711	3.767	0.0885	3.7856	3.7666	6.9515	712	3.686	3.742	0.1055	3.7776	3.7421	7.0697	7428
Pilot_screen_BYxRM	haploid-R1	P9	H5	YBR009C	RM	Haploid	OK	3.736	3.775	0.0887	3.8155	3.7749	7.0913	607	3.726	3.783	0.1152	3.8282	3.7833	7.2297	5594
Pilot_screen_BYxRM	haploid-R2	P9	L11,L12	YBR010W	BY	Haploid	Bad-var	2.589	2.599	0.0281	2.6203	2.5987	4.3997	1781	2.635	2.63	0.071	2.7113	2.6297	5.0069	17939
Pilot_screen_BYxRM	haploid-R2	P9	L11,L12	YBR010W	RM	Haploid	Bad-var	2.439	2.468	0.0689	2.5467	2.4683	5.7887	1649	2.464	2.489	0.0786	2.5708	2.4895	5.6544	15860
Pilot_screen_BYxRM	haploid-R1	P9	K12	YBR010W	BY	Haploid	Bad-var	2.854	2.857	0.0264	2.8893	2.8568	5.3028	783	2.864	2.856	0.0421	2.9183	2.8562	5.4618	7870
Pilot_screen_BYxRM	haploid-R1	P9	K12	YBR010W	RM	Haploid	Bad-var	2.829	2.836	0.0195	2.8527	2.8356	4.8942	673	2.849	2.857	0.0351	2.8897	2.8568	5.155	6597
Pilot_screen_BYxRM	haploid-R2	P7	J17,J18	YBR011C	BY	Haploid	Bad-mean	3.001	2.769	0.2437	3.3209	2.7687	6.8815	264	3.026	2.817	0.3158	3.4068	2.8172	7.086	2904
Pilot_screen_BYxRM	haploid-R2	P7	J17,J18	YBR011C	RM	Haploid	Bad-count-mean	2.748	2.711	0.0945	2.8732	2.7111	5.8663	198	2.748	2.723	0.1245	2.938	2.723	6.2801	1832
Pilot_screen_BYxRM	haploid-R1	P7	I18	YBR011C	BY	Haploid	Bad-count-mean	3.261	3.126	0.1512	3.4802	3.1259	7.181	139	3.283	3.164	0.1974	3.5457	3.1636	7.3237	1394
Pilot_screen_BYxRM	haploid-R1	P7	I18	YBR011C	RM	Haploid	Bad-count-mean	3.487	3.355	0.1647	3.6653	3.3646	7.177	12	3.32	3.201	0.1957	3.5648	3.2008	7.2646	119
Pilot_screen_BYxRM	haploid-R2	P8	K21,K22	YBR014C	BY	Haploid	Bad-var	2.751	2.75	0.0259	2.7809	2.7498	4.772	1335	2.764	2.76	0.0714	2.8424	2.7603	5.2774	13478
Pilot_screen_BYxRM	haploid-R2	P8	K21,K22	YBR014C	RM	Haploid	Bad-var	2.595	2.606	0.0253	2.6227	2.6058	4.3838	786	2.593	2.61	0.0538	2.6469	2.6097	4.6747	7351
Pilot_screen_BYxRM	haploid-R1	P8	L21	YBR014C	BY	Haploid	Bad-var	2.962	2.952	0.0306	3.0109	2.9518	5.9428	717	3.022	2.984	0.074	3.1243	2.9839	6.4704	8300
Pilot_screen_BYxRM	haploid-R1	P8	L21	YBR014C	RM	Haploid	Bad-var	2.924	2.916	0.0253	2.9823	2.916	6.6047	766	2.948	2.939	0.0406	3.0083	2.9389	6.2665	6429
Pilot_screen_BYxRM	haploid-R2	P10	E15,E16	YBR015C	BY	Haploid	OK	2.68	2.687	0.0431	2.7292	2.6873	4.9108	1194	2.791	2.8	0.0795	2.8732	2.8001	5.3375	13318
Pilot_screen_BYxRM	haploid-R2	P10	E15,E16	YBR015C	RM	Haploid	OK	2.716	2.728	0.0296	2.7477	2.7279	4.636	2146	2.715	2.734	0.0443	2.761	2.7339	4.821	20637
Pilot_screen_BYxRM	haploid-R1	P10	F15	YBR015C	BY	Haploid	OK	3.055	3.052	0.0236	3.0867	3.0524	5.5948	618	3.101	3.073	0.0591	3.1747	3.0725	6.0294	6781
Pilot_screen_BYxRM	haploid-R1	P10	F15	YBR015C	RM	Haploid	OK	3.07	3.069	0.0192	3.095	3.0686	5.3895	448	3.075	3.072	0.0376	3.1199	3.0718	5.8162	3775
Pilot_screen_BYxRM	fillin	Haploid-fillin_P1	B17	YBR015C	BY	Haploid	NA	3.161	3.151	0.0339	3.204	3.1513	5.8829	592	3.17	3.153	0.0579	3.2387	3.1535	6.0603	6004
Pilot_screen_BYxRM	fillin	Haploid-fillin_P1	B17	YBR015C	RM	Haploid	NA	3.101	3.109	0.021	3.1247	3.1087	5.3137	559	3.07	3.077	0.0398	3.1141	3.0773	5.5446	3848
Pilot_screen_BYxRM	haploid-R2	P9	L3,L4	YBR016W	BY	Haploid	Bad-var	2.955	2.915	0.0917	3.0916	2.915	6.2956	965	3	2.907	0.1637	3.2173	2.9071	6.6384	9590
Pilot_screen_BYxRM	haploid-R2	P9	L3,L4	YBR016W	RM	Haploid	Bad-var	2.801	2.828	0.0247	2.8257	2.8281	4.643	967	2.777	2.809	0.0514	2.829	2.8087	5	9597
Pilot_screen_BYxRM	haploid-R1	P9	K4	YBR016W	BY	Haploid	Bad-var	3.089	3.089	0.0157	3.1092	3.0886	5.4535	755	3.11	3.09	0.0415	3.1739	3.0904	6.2143	8081
Pilot_screen_BYxRM	haploid-R1	P9	K4	YBR016W	RM	Haploid	Bad-var	3.036	3.045	0.0114	3.0481	3.0446	4.829	659	3.039	3.046	0.023	3.0664	3.0463	5.3377	6044
Pilot_screen_BYxRM	haploid-R2	P1	F1,F2	YBR017C	BY	Haploid	Bad-count	3.08	3.097	0.1076	3.1811	3.0974	6.0265	215	3.137	3.148	0.106	3.2707	3.1477	7.2299	2365
Pilot_screen_BYxRM	haploid-R2	P1	F1,F2	YBR017C	RM	Haploid	OK	2.99	3.027	0.0882	3.0732	3.0268	5.7217	1451	3.011	3.046	0.1056	3.1202	3.0458	6.7349	13818
Pilot_screen_BYxRM	haploid-R1	P1	F2	YBR017C	BY	Haploid	OK	3.059	3	0.0523	3.1277	2.9996	5.9255	533	3.148	3.122	0.093	3.2563	3.122	6.2831	6541
Pilot_screen_BYxRM	haploid-R1	P1	F2	YBR017C	RM	Haploid	OK	2.973	2.944	0.0384	3.0211	2.9436	5.5062	728	2.948	2.927	0.0606	3.0204	2.9271	5.6534	5946
Pilot_screen_BYxRM	haploid-R2	P10	C15,C16	YBR023C	BY	Haploid	OK	2.836	2.85	0.032	2.8705	2.8505	4.9327	1415	2.843	2.862	0.066	2.9105	2.862	5.3094	13929
Pilot_screen_BYxRM	haploid-R2	P10	C15,C16	YBR023C	RM	Haploid	OK	2.807	2.842	0.0416	2.8474	2.842	4.8773	1794	2.785	2.809	0.06	2.8453	2.8087	5.1086	16758
Pilot_screen_BYxRM	haploid-R1	P10	C15	YBR023C	BY	Haploid	OK	3.082	3.088	0.0318	3.1238	3.0879	5.828	853	3.134	3.12	0.057	3.2033	3.1203	6.2143	10407
Pilot_screen_BYxRM	haploid-R1	P10	C15	YBR023C	RM	Haploid	OK	3.145	3.153	0.0159	3.1622	3.1527	5.2815	1290	3.148	3.151	0.031	3.1826	3.1514	5.6503	10840
Pilot_screen_BYxRM	fillin	Haploid-fillin_P1	B18	YBR023C	BY	Haploid	NA	3.193	3.204	0.0321	3.2308	3.2043	5.8023	606	3.231	3.223	0.0559	3.2949	3.223	6.1206	6134
Pilot_screen_BYxRM	fillin	Haploid-fillin_P1	B18	YBR023C	RM	Haploid	NA	3.225	3.239	0.0195	3.2464	3.2387	5.4556	988	3.202	3.208	0.0331	3.2383	3.2085	5.6947	6006
Pilot_screen_BYxRM	haploid-R2	P5	P22	YBR025C	BY	Haploid	Bad-count	3.958	4.154	0.2319	4.1149	4.1545	7.6999	211	3.908	4.11	0.2471	4.0859	4.1097	7.8113	2533
Pilot_screen_BYxRM	haploid-R2	P5	P22	YBR025C	RM	Haploid	OK	3.853	4.011	0.2102	3.9971	4.0105	7.4636	278	3.85	4.023	0.2233	4.0066	4.0226	7.5505	2351
Pilot_screen_BYxRM	haploid-R1	P5	P22	YBR025C	BY	Haploid	OK	3.86	4.048	0.2403	4.054	4.0477	7.9249	405	3.848	4.008	0.2961	4.1173	4.0082	8.284	4658
Pilot_screen_BYxRM	haploid-R1	P5	P22	YBR025C	RM	Haploid	OK	3.938	4.051	0.1244	4.0278	4.0509	7.352	295	3.903	4.016	0.1514	4.0202	4.0157	7.555	2359
Pilot_screen_BYxRM	haploid-R2	P5	F04	YBR026C	BY	Haploid	OK	3.073	3.063	0.0428	3.1352	3.0628	6.13	269	3.076	3.048	0.0686	3.1679	3.0479	6.2388	2884
Pilot_screen_BYxRM	haploid-R2	P5	F04	YBR026C	RM	Haploid	OK	2.866	2.876	0.044	2.9204	2.8762	5.5342	390	2.895	2.892	0.0536	2.9597	2.8925	5.6914	3651
Pilot_screen_BYxRM	haploid-R1	P5	F4	YBR026C	BY	Haploid	OK	3.114	3.067	0.0564	3.1983	3.0667	6.3436	364	3.235	3.149	0.1305	3.4018	3.1492	6.8366	4594
Pilot_screen_BYxRM	haploid-R1	P5	F4	YBR026C	RM	Haploid	OK	2.983	2.969	0.0274	3.023	2.9689	5.6592	716	2.993	2.975	0.0468	3.0537	2.9752	5.7647	6155
Pilot_screen_BYxRM	fillin	Haploid-fillin_P1	B19	YBR026C	BY	Haploid	NA	3.217	3.149	0.0787	3.3397	3.1488	6.7427	702	3.199	3.104	0.132	3.3934	3.1042	7.0065	6802
Pilot_screen_BYxRM	fillin	Haploid-fillin_P1	B19	YBR026C	RM	Haploid	NA	3.03	3.033	0.0212	3.0544	3.033	5.1781	994	2.981	2.979	0.0397	3.0269	2.9795	5.4739	7177
Pilot_screen_BYxRM	haploid-R2	P4	O03	YBR028C	BY	Haploid	OK	3.02	3.024	0.0185	3.0412	3.024	5.1072	251	3.047	3.052	0.0247	3.0755	3.0519	5.3716	2432
Pilot_screen_BYxRM	haploid-R2	P4	O03	YBR028C	RM	Haploid	OK	2.912	2.932	0.0373	2.9497	2.932	5.0842	386	2.934	2.952	0.0424	2.9789	2.9524	5.4255	4041
Pilot_screen_BYxRM	haploid-R1	P4	O3	YBR028C	BY	Haploid	OK	3.037	3.046	0.0153	3.0541	3.0456	5.0434	504	3.066	3.06	0.0354	3.1099	3.0605	5.7071	5760
Pilot_screen_BYxRM	haploid-R1	P4	O3	YBR028C	RM	Haploid	OK	2.988	2.991	0.0143	3.0046	2.9911	4.9214	495	2.977	2.983	0.0305	3.0396	2.983	6.9704	4238
Pilot_screen_BYxRM	haploid-R2	P3	D02	YBR030W	BY	Haploid	OK	2.941	2.953	0.0303	2.9751	2.9534	5.1667	1048	2.951	2.963	0.034	2.9887	2.9627	5.2641	10113
Pilot_screen_BYxRM	haploid-R2	P3	D02	YBR030W	RM	Haploid	OK	2.878	2.899	0.0433	2.9187	2.8991	5.066	744	2.91	2.92	0.04	2.9536	2.9203	5.2641	7595
Pilot_screen_BYxRM	haploid-R1	P3	D2	YBR030W	BY	Haploid	OK	2.992	2.982	0.0237	3.0227	2.9821	5.3651	587	3.066	3.029	0.0645	3.1483	3.0293	6.0233	7431
Pilot_screen_BYxRM	haploid-R1	P3	D2	YBR030W	RM	Haploid	OK	2.943	2.947	0.015	2.9604	2.9468	4.9003	1768	2.933	2.94	0.033	2.9707	2.9404	5.2217	16029
Pilot_screen_BYxRM	fillin	Haploid-fillin_P1	B20	YBR030W	BY	Haploid	NA	3.121	3.11	0.0257	3.1548	3.1096	5.6968	1000	3.127	3.088	0.0563	3.1986	3.0877	6.0558	9820
Pilot_screen_BYxRM	fillin	Haploid-fillin_P1	B20	YBR030W	RM	Haploid	NA	3.045	3.051	0.0163	3.0637	3.0515	5.0599	1387	3.016	3.022	0.0311	3.0508	3.0219	5.3314	9517
Pilot_screen_BYxRM	haploid-R2	P6	G03	YBR031W	BY	Haploid	Bad-count-mean	3.1	2.981	0.0684	3.2093	2.9809	6.3901	9	3.054	2.97	0.1021	3.196	2.9705	6.4518	135
Pilot_screen_BYxRM	haploid-R2	P6	G03	YBR031W	RM	Haploid	Bad-count-mean	2.785	2.714	0.0879	2.9259	2.7153	5.9838	24	2.858	2.845	0.0956	3.0061	2.8447	6.4429	195
Pilot_screen_BYxRM	haploid-R1	P6	G3	YBR031W	BY	Haploid	Bad-count-mean	3.032	3.032	0.0601	3.1314	3.0325	6.2582	13	3.048	2.974	0.1148	3.2668	2.974	7.0515	142
Pilot_screen_BYxRM	haploid-R1	P6	G3	YBR031W	RM	Haploid	Bad-count-mean	2.954	2.951	0.0237	2.9815	2.9545	5.0546	10	3.043	3.032	0.0644	3.1547	3.0321	6.5176	97
Pilot_screen_BYxRM	haploid-R2	P6	O10	YBR034C	BY	Haploid	OK	3.535	3.576	0.0441	3.5764	3.5756	6.3276	419	3.545	3.574	0.0457	3.5905	3.5736	6.4781	5106
Pilot_screen_BYxRM	haploid-R2	P6	O10	YBR034C	RM	Haploid	OK	3.473	3.505	0.0478	3.5177	3.5053	6.2526	656	3.489	3.526	0.0569	3.5433	3.5263	6.4293	5702
Pilot_screen_BYxRM	haploid-R1	P6	O10	YBR034C	BY	Haploid	OK	3.491	3.532	0.0346	3.5207	3.5318	5.9952	851	3.464	3.508	0.0466	3.5075	3.508	6.2151	8616
Pilot_screen_BYxRM	haploid-R1	P6	O10	YBR034C	RM	Haploid	OK	3.503	3.528	0.0232	3.5249	3.5285	6.0116	459	3.482	3.513	0.0413	3.5194	3.5133	6.17	4449
Pilot_screen_BYxRM	haploid-R2	P11	O23,O24	YBR036C	BY	Haploid	Bad-count	3.018	3.074	0.0664	3.0816	3.0736	5.5089	37	3.068	3.081	0.0773	3.1523	3.0807	5.9372	856
Pilot_screen_BYxRM	haploid-R2	P11	O23,O24	YBR036C	RM	Haploid	Bad-count	2.95	2.992	0.0444	2.9899	2.9924	5.0715	68	2.928	2.971	0.0773	2.9925	2.971	5.5062	831
Pilot_screen_BYxRM	haploid-R1	P11	O23	YBR036C	BY	Haploid	OK	3.292	3.316	0.032	3.3241	3.3156	5.7913	704	3.304	3.307	0.0547	3.3663	3.3069	6.2975	8081
Pilot_screen_BYxRM	haploid-R1	P11	O23	YBR036C	RM	Haploid	OK	3.26	3.274	0.0202	3.2817	3.274	5.5497	674	3.27	3.28	0.033	3.3058	3.2805	5.8303	5545
Pilot_screen_BYxRM	haploid-R2	P11	P13,P14	YBR037C	BY	Haploid	Bad-var	2.646	2.659	0.0206	2.6692	2.6593	4.4219	1323	2.699	2.68	0.0551	2.7653	2.6803	5.1339	13139
Pilot_screen_BYxRM	haploid-R2	P11	P13,P14	YBR037C	RM	Haploid	Bad-var	2.564	2.585	0.0515	2.6144	2.5847	4.5579	1003	2.599	2.622	0.0658	2.6618	2.6225	4.7385	9747
Pilot_screen_BYxRM	haploid-R1	P11	O14	YBR037C	BY	Haploid	Bad-var	2.955	2.953	0.0183	2.9815	2.9534	5.386	623	3	2.963	0.0505	3.0774	2.9632	6.2373	6417
Pilot_screen_BYxRM	haploid-R1	P11	O14	YBR037C	RM	Haploid	Bad-var	2.939	2.932	0.0347	3.0369	2.9325	6.8548	561	2.934	2.93	0.0389	3.0166	2.9299	6.6738	5401
Pilot_screen_BYxRM	fillin	Haploid-fillin_P1	B21	YBR037C	BY	Haploid	NA	3.077	3.066	0.0294	3.1171	3.0663	5.7256	670	3.076	3.028	0.0684	3.1678	3.0282	6.1661	6127
Pilot_screen_BYxRM	fillin	Haploid-fillin_P1	B21	YBR037C	RM	Haploid	NA	2.975	2.98	0.0172	2.9944	2.9804	4.9507	1469	2.948	2.948	0.033	2.9851	2.9484	5.2487	9745
Pilot_screen_BYxRM	haploid-R2	P11	H21,H22	YBR039W	BY	Haploid	OK	3.564	3.63	0.11	3.6523	3.6299	6.7566	1379	3.582	3.63	0.1793	3.7418	3.6299	7.3199	13655
Pilot_screen_BYxRM	haploid-R2	P11	H21,H22	YBR039W	RM	Haploid	OK	3.479	3.519	0.1026	3.5712	3.5192	6.7505	1383	3.483	3.511	0.1444	3.6289	3.5113	7.2219	13187
Pilot_screen_BYxRM	haploid-R1	P11	G22	YBR039W	BY	Haploid	OK	3.709	3.765	0.0786	3.7796	3.765	6.9616	563	3.699	3.732	0.1261	3.8249	3.7319	7.4344	6014
Pilot_screen_BYxRM	haploid-R1	P11	G22	YBR039W	RM	Haploid	OK	3.604	3.658	0.0937	3.6897	3.6578	6.8917	630	3.573	3.632	0.1468	3.711	3.632	7.2927	5790
Pilot_screen_BYxRM	haploid-R2	P10	M21,M22	YBR041W	BY	Haploid	OK	2.744	2.747	0.031	2.7799	2.7471	4.8858	873	2.756	2.769	0.0712	2.8296	2.7686	5.2143	8504
Pilot_screen_BYxRM	haploid-R2	P10	M21,M22	YBR041W	RM	Haploid	OK	2.585	2.596	0.0402	2.6296	2.5964	4.6268	1771	2.608	2.623	0.0566	2.6671	2.6232	4.8284	16401
Pilot_screen_BYxRM	haploid-R1	P10	N21	YBR041W	BY	Haploid	OK	3.008	3.004	0.0311	3.0503	3.0037	5.6258	444	3.107	3.078	0.069	3.1889	3.0782	6.0569	5230
Pilot_screen_BYxRM	haploid-R1	P10	N21	YBR041W	RM	Haploid	OK	2.941	2.932	0.0243	2.9728	2.9323	5.286	563	2.951	2.936	0.0467	3.0121	2.9358	5.7444	4565
Pilot_screen_BYxRM	fillin	Haploid-fillin_P1	B22	YBR041W	BY	Haploid	NA	3.097	3.085	0.0323	3.1365	3.0855	5.6355	954	3.144	3.125	0.0628	3.2171	3.1254	6.0233	8996
Pilot_screen_BYxRM	fillin	Haploid-fillin_P1	B22	YBR041W	RM	Haploid	NA	3	3.001	0.0196	3.0232	3.0012	5.1626	1622	2.976	2.969	0.041	3.0228	2.9695	5.4294	11267
Pilot_screen_BYxRM	haploid-R2	P11	G21,G22	YBR042C	BY	Haploid	Bad-count-mean	2.947	2.998	0.0521	3.0025	2.9987	5.3566	38	3.007	3.025	0.0742	3.0944	3.0249	5.9444	855
Pilot_screen_BYxRM	haploid-R2	P11	G21,G22	YBR042C	RM	Haploid	Bad-count-mean	2.58	2.591	0.0302	2.6149	2.591	4.506	112	2.612	2.616	0.0642	2.679	2.6161	4.8691	880
Pilot_screen_BYxRM	haploid-R1	P11	G21	YBR042C	BY	Haploid	Bad-mean	2.98	2.976	0.0231	3.0143	2.9762	5.5917	537	3.037	2.995	0.0558	3.1159	2.9952	6.0874	6169
Pilot_screen_BYxRM	haploid-R1	P11	G21	YBR042C	RM	Haploid	Bad-mean	2.928	2.926	0.0169	2.9488	2.9259	4.9579	340	2.963	2.951	0.0358	3.0111	2.9509	5.6526	2571
Pilot_screen_BYxRM	fillin	Haploid-fillin_P1	B23	YBR042C	BY	Haploid	NA	3.08	3.065	0.028	3.1169	3.0646	5.6231	1294	3.133	3.088	0.0547	3.2014	3.0877	6.0145	8836
Pilot_screen_BYxRM	fillin	Haploid-fillin_P1	B23	YBR042C	RM	Haploid	NA	3.003	3.002	0.0179	3.0243	3.0026	5.1021	722	2.999	2.998	0.0297	3.0334	2.9983	5.322	3542
Pilot_screen_BYxRM	haploid-R2	P10	F5,F6	YBR043C	BY	Haploid	OK	2.818	2.823	0.0344	2.8617	2.8233	5.3124	854	2.832	2.83	0.0797	2.92	2.8301	5.5658	8580
Pilot_screen_BYxRM	haploid-R2	P10	F5,F6	YBR043C	RM	Haploid	OK	2.734	2.744	0.0306	2.7676	2.7443	4.7423	1784	2.724	2.74	0.0508	2.7796	2.7397	5.0806	16807
Pilot_screen_BYxRM	haploid-R1	P10	E6	YBR043C	BY	Haploid	OK	3.04	3.048	0.0225	3.0671	3.0477	5.4422	777	3.08	3.058	0.0514	3.1458	3.0582	5.9668	8509
Pilot_screen_BYxRM	haploid-R1	P10	E6	YBR043C	RM	Haploid	OK	3.069	3.074	0.0201	3.0918	3.0744	5.2636	720	3.063	3.065	0.0363	3.1044	3.0651	5.6049	6342
Pilot_screen_BYxRM	fillin	Haploid-fillin_P1	B24	YBR043C	BY	Haploid	NA	3.144	3.14	0.0259	3.1771	3.1404	5.723	944	3.171	3.146	0.0516	3.2349	3.1461	6.0766	8096
Pilot_screen_BYxRM	fillin	Haploid-fillin_P1	B24	YBR043C	RM	Haploid	NA	3.088	3.089	0.0207	3.1112	3.0895	5.2874	1360	3.058	3.063	0.0352	3.0976	3.0628	5.4852	9383
Pilot_screen_BYxRM	haploid-R2	P6	P11	YBR046C	BY	Haploid	Bad-var	3.235	3.234	0.035	3.2804	3.2344	6.152	348	3.354	3.255	0.1191	3.5324	3.2549	7.2674	4268
Pilot_screen_BYxRM	haploid-R2	P6	P11	YBR046C	RM	Haploid	Bad-var	3.127	3.107	0.0612	3.2988	3.107	7.8982	345	3.15	3.129	0.0565	3.2347	3.1295	7.0682	2620
Pilot_screen_BYxRM	haploid-R1	P6	P11	YBR046C	BY	Haploid	Bad-var	3.086	3.092	0.0181	3.1095	3.0919	5.4704	780	3.109	3.089	0.0429	3.1798	3.0886	6.3811	7743
Pilot_screen_BYxRM	haploid-R1	P6	P11	YBR046C	RM	Haploid	Bad-var	2.973	2.965	0.0251	3.0029	2.9653	5.2143	444	2.988	2.979	0.0381	3.0389	2.9793	5.7613	4496
Pilot_screen_BYxRM	haploid-R2	P8	F10,F9	YBR047W	BY	Haploid	OK	2.625	2.623	0.0434	2.6873	2.6236	5.4306	1989	2.682	2.656	0.0861	2.7887	2.6561	5.5715	19960
Pilot_screen_BYxRM	haploid-R2	P8	F10,F9	YBR047W	RM	Haploid	OK	2.529	2.546	0.0354	2.5682	2.5465	4.4358	1093	2.52	2.54	0.0587	2.5847	2.5402	5.152	10210
Pilot_screen_BYxRM	haploid-R1	P8	F10	YBR047W	BY	Haploid	OK	2.897	2.887	0.0273	2.9357	2.8874	5.5266	854	2.944	2.903	0.0714	3.0394	2.9031	5.9713	9026
Pilot_screen_BYxRM	haploid-R1	P8	F10	YBR047W	RM	Haploid	OK	2.838	2.834	0.0291	2.8747	2.8343	5.1626	600	2.858	2.841	0.0587	2.9341	2.841	5.7442	5508
Pilot_screen_BYxRM	haploid-R2	P6	P01	YBR048W	BY	Haploid	Bad-var	2.938	2.958	0.0312	2.971	2.9581	5.1199	282	2.993	2.986	0.0469	3.054	2.986	6.041	3421
Pilot_screen_BYxRM	haploid-R2	P6	P01	YBR048W	RM	Haploid	Bad-var	2.867	2.873	0.1063	3.2561	2.8732	8.3181	275	2.853	2.871	0.0762	3.0054	2.8714	7.4925	2131
Pilot_screen_BYxRM	haploid-R1	P6	P1	YBR048W	BY	Haploid	Bad-var	2.973	2.969	0.0222	3.0057	2.9686	5.528	889	2.995	2.977	0.0452	3.0591	2.977	5.9133	8885
Pilot_screen_BYxRM	haploid-R1	P6	P1	YBR048W	RM	Haploid	Bad-var	2.945	2.947	0.0212	2.9701	2.9474	5.0607	426	2.972	2.966	0.0365	3.0186	2.9658	5.6245	4116
Pilot_screen_BYxRM	haploid-R2	P2	P10,P9	YBR049C	BY	Haploid	OK	3.384	3.423	0.0423	3.4298	3.4227	6.2312	1722	3.424	3.433	0.0618	3.4867	3.4331	6.4214	17295
Pilot_screen_BYxRM	haploid-R2	P2	P10,P9	YBR049C	RM	Haploid	OK	3.4	3.42	0.0141	3.4136	3.4203	5.5379	587	3.377	3.392	0.0254	3.4025	3.3923	5.8551	5076
Pilot_screen_BYxRM	haploid-R1	P2	O10	YBR049C	BY	Haploid	Bad-count	3.345	3.369	0.0333	3.3831	3.3688	6.1021	174	3.377	3.372	0.0663	3.4487	3.3721	6.433	2116
Pilot_screen_BYxRM	haploid-R1	P2	O10	YBR049C	RM	Haploid	OK	3.293	3.332	0.0273	3.3193	3.3325	5.6244	250	3.256	3.293	0.0408	3.298	3.2933	5.8495	2088
Pilot_screen_BYxRM	haploid-R2	P8	B7,B8	YBR052C	BY	Haploid	OK	3.136	3.229	0.0858	3.2128	3.2292	5.8128	1374	3.14	3.198	0.1128	3.2504	3.1984	6.2022	13759
Pilot_screen_BYxRM	haploid-R2	P8	B7,B8	YBR052C	RM	Haploid	OK	3.137	3.17	0.043	3.1764	3.1697	5.4909	1207	3.124	3.165	0.0707	3.1937	3.1649	6.0611	11371
Pilot_screen_BYxRM	haploid-R1	P8	A8	YBR052C	BY	Haploid	OK	3.363	3.406	0.0466	3.4083	3.4061	6.0777	1822	3.369	3.386	0.0611	3.4331	3.3858	6.3738	18477
Pilot_screen_BYxRM	haploid-R1	P8	A8	YBR052C	RM	Haploid	OK	3.327	3.334	0.0237	3.353	3.3339	5.7702	998	3.344	3.346	0.0425	3.3911	3.3456	6.1853	9369
Pilot_screen_BYxRM	haploid-R2	P11	I7,I8	YBR054W	BY	Haploid	Bad-count-mean-var	3.11	3.084	0.0857	3.2249	3.0836	6.3657	29	3.245	3.174	0.1886	3.4801	3.1742	7.1973	505
Pilot_screen_BYxRM	haploid-R2	P11	I7,I8	YBR054W	RM	Haploid	Bad-count-mean-var	3.061	2.96	0.1891	3.323	2.96	7.0103	68	3.032	2.913	0.3046	3.4956	2.9135	7.6624	752
Pilot_screen_BYxRM	haploid-R1	P11	I7	YBR054W	BY	Haploid	Bad-mean-var	3.513	3.526	0.0786	3.6016	3.5262	6.8856	523	3.521	3.511	0.1214	3.6723	3.5114	7.417	6164
Pilot_screen_BYxRM	haploid-R1	P11	I7	YBR054W	RM	Haploid	Bad-mean-var	3.133	3.101	0.0722	3.2255	3.1015	6.2711	770	3.186	3.133	0.1166	3.3626	3.1328	7.0976	6712
Pilot_screen_BYxRM	haploid-R2	P2	K19,K20	YBR055C	BY	Haploid	OK	3.128	3.121	0.0325	3.1692	3.1206	5.8252	1731	3.196	3.158	0.0839	3.2931	3.1582	6.3243	17748
Pilot_screen_BYxRM	haploid-R2	P2	K19,K20	YBR055C	RM	Haploid	OK	3.025	3.039	0.0347	3.0629	3.0386	5.4302	1083	3.039	3.062	0.0527	3.0921	3.062	5.5704	9779
Pilot_screen_BYxRM	haploid-R1	P2	K19	YBR055C	BY	Haploid	Bad-count	3.082	3.053	0.0362	3.1331	3.0528	5.8643	248	3.158	3.119	0.0727	3.2478	3.1193	6.239	3530
Pilot_screen_BYxRM	haploid-R1	P2	K19	YBR055C	RM	Haploid	OK	2.991	2.997	0.0191	3.0306	2.9973	6.3861	694	2.988	2.988	0.0324	3.0329	2.9884	6.1735	5811
Pilot_screen_BYxRM	haploid-R2	P4	O02	YBR056W	BY	Haploid	OK	2.96	2.947	0.0346	3.0072	2.9474	5.6136	288	2.958	2.942	0.0447	3.0236	2.9423	6.0484	2735
Pilot_screen_BYxRM	haploid-R2	P4	O02	YBR056W	RM	Haploid	OK	2.81	2.815	0.0598	2.8846	2.815	5.5621	479	2.816	2.824	0.0564	2.8845	2.8238	5.5119	4961
Pilot_screen_BYxRM	haploid-R1	P4	O2	YBR056W	BY	Haploid	OK	2.961	2.946	0.0325	3.0075	2.9459	5.6119	387	2.995	2.974	0.046	3.0587	2.9742	5.9067	3872
Pilot_screen_BYxRM	haploid-R1	P4	O2	YBR056W	RM	Haploid	OK	2.843	2.843	0.0245	2.8741	2.8432	5.1062	915	2.846	2.851	0.0345	2.8869	2.8513	5.2057	9180
Pilot_screen_BYxRM	fillin	Haploid-fillin_P1	C01	YBR056W	BY	Haploid	NA	3.183	3.108	0.0687	3.274	3.1082	6.3197	770	3.223	3.118	0.12	3.3709	3.118	6.6595	8060
Pilot_screen_BYxRM	fillin	Haploid-fillin_P1	C01	YBR056W	RM	Haploid	NA	2.981	2.98	0.0209	3.0095	2.9802	5.5368	660	2.933	2.935	0.0312	2.9725	2.9351	5.49	4202
Pilot_screen_BYxRM	haploid-R2	P6	E09	YBR057C	BY	Haploid	OK	2.977	2.998	0.0258	3.0028	2.9983	5.0228	839	3.008	3.016	0.0315	3.0436	3.0159	5.443	8364
Pilot_screen_BYxRM	haploid-R2	P6	E09	YBR057C	RM	Haploid	OK	2.916	2.929	0.0252	2.9431	2.9291	4.9556	584	2.93	2.941	0.03	2.9635	2.9408	5.3773	5581
Pilot_screen_BYxRM	haploid-R1	P6	E9	YBR057C	BY	Haploid	OK	2.975	2.98	0.0141	2.994	2.9802	5.1821	942	2.977	2.976	0.0272	3.0123	2.9761	5.4565	9152
Pilot_screen_BYxRM	haploid-R1	P6	E9	YBR057C	RM	Haploid	OK	2.936	2.939	0.017	2.9565	2.9391	4.9934	566	2.942	2.947	0.0269	2.9727	2.9474	5.1538	5876
Pilot_screen_BYxRM	haploid-R2	P2	J7,J8	YBR058C	BY	Haploid	OK	3.057	3.049	0.0498	3.1178	3.0487	5.8479	1580	3.14	3.089	0.0995	3.2623	3.0886	6.4115	15839
Pilot_screen_BYxRM	haploid-R2	P2	J7,J8	YBR058C	RM	Haploid	OK	2.964	2.981	0.0339	3.0007	2.9807	5.2385	1276	2.962	2.979	0.0514	3.0153	2.9793	5.4646	11931
Pilot_screen_BYxRM	haploid-R1	P2	I8	YBR058C	BY	Haploid	OK	3.116	3.058	0.0557	3.1936	3.0584	6.1355	262	3.264	3.225	0.116	3.3956	3.2247	6.6402	3591
Pilot_screen_BYxRM	haploid-R1	P2	I8	YBR058C	RM	Haploid	OK	2.97	2.967	0.0175	2.9937	2.9668	5.2797	469	2.958	2.95	0.0348	3.006	2.9503	6.1284	3688
Pilot_screen_BYxRM	haploid-R2	P1	C19,C20	YBR059C	BY	Haploid	OK	3.255	3.263	0.0258	3.284	3.263	5.7734	1586	3.279	3.28	0.0413	3.3255	3.2805	6.0763	15614
Pilot_screen_BYxRM	haploid-R2	P1	C19,C20	YBR059C	RM	Haploid	OK	3.193	3.206	0.0249	3.2193	3.2057	5.629	1804	3.201	3.211	0.0384	3.2416	3.2112	5.7904	17652
Pilot_screen_BYxRM	haploid-R1	P1	D19	YBR059C	BY	Haploid	OK	3.151	3.162	0.017	3.1729	3.1618	5.5982	979	3.174	3.162	0.0332	3.216	3.1621	5.8656	10617
Pilot_screen_BYxRM	haploid-R1	P1	D19	YBR059C	RM	Haploid	OK	3.107	3.115	0.0123	3.1202	3.1153	5.0318	879	3.114	3.116	0.0237	3.1416	3.1156	5.4767	7876
Pilot_screen_BYxRM	haploid-R2	P3	P23	YBR060C	BY	Haploid	OK	2.909	2.927	0.0207	2.9307	2.9272	4.8227	560	2.928	2.941	0.0258	2.9591	2.9413	5.6024	5457
Pilot_screen_BYxRM	haploid-R2	P3	P23	YBR060C	RM	Haploid	OK	2.853	2.865	0.0268	2.8812	2.8647	4.8375	400	2.879	2.896	0.0295	2.9098	2.896	5.0026	4365
Pilot_screen_BYxRM	haploid-R1	P3	P23	YBR060C	BY	Haploid	OK	2.948	2.951	0.0157	2.9652	2.9513	4.8585	340	3.013	2.982	0.0479	3.0732	2.9825	5.7659	3889
Pilot_screen_BYxRM	haploid-R1	P3	P23	YBR060C	RM	Haploid	OK	2.903	2.906	0.0171	2.9218	2.9058	4.8065	659	2.917	2.921	0.0285	2.9491	2.9208	5.131	6071
Pilot_screen_BYxRM	haploid-R2	P6	N04	YBR061C	BY	Haploid	OK	3.11	3.136	0.031	3.1417	3.1359	5.4084	436	3.14	3.15	0.0379	3.1805	3.1496	5.6835	5379
Pilot_screen_BYxRM	haploid-R2	P6	N04	YBR061C	RM	Haploid	OK	3.075	3.106	0.0304	3.1052	3.1063	5.2767	434	3.088	3.108	0.037	3.1258	3.108	5.4672	3285
Pilot_screen_BYxRM	haploid-R1	P6	N4	YBR061C	BY	Haploid	OK	2.996	3.002	0.0198	3.0211	3.0022	5.3614	842	3.006	3.009	0.0337	3.047	3.0087	5.5108	8730
Pilot_screen_BYxRM	haploid-R1	P6	N4	YBR061C	RM	Haploid	OK	2.994	2.996	0.0204	3.0175	2.9965	5.1255	593	2.999	3.006	0.0299	3.0334	3.0057	5.4612	5513
Pilot_screen_BYxRM	haploid-R2	P6	O05	YBR065C	BY	Haploid	Bad-var	2.945	2.941	0.0446	3.0538	2.9413	6.7645	668	2.974	2.972	0.0514	3.0716	2.9724	6.7061	7512
Pilot_screen_BYxRM	haploid-R2	P6	O05	YBR065C	RM	Haploid	Bad-var	2.877	2.894	0.0565	2.989	2.8937	6.7197	668	2.904	2.909	0.0691	3.0683	2.9089	7.0314	5605
Pilot_screen_BYxRM	haploid-R1	P6	O5	YBR065C	BY	Haploid	Bad-var	2.961	2.941	0.0346	3.0267	2.9414	6.2721	1120	2.974	2.95	0.0491	3.057	2.9503	6.3852	11110
Pilot_screen_BYxRM	haploid-R1	P6	O5	YBR065C	RM	Haploid	Bad-var	2.893	2.887	0.0284	2.9278	2.8874	5.1798	349	2.94	2.918	0.0566	3.049	2.9177	6.6731	3621
Pilot_screen_BYxRM	haploid-R2	P8	D21,D22	YBR066C	BY	Haploid	OK	2.668	2.679	0.0249	2.6963	2.6789	4.5484	1950	2.718	2.701	0.0614	2.7889	2.7015	5.1691	19269
Pilot_screen_BYxRM	haploid-R2	P8	D21,D22	YBR066C	RM	Haploid	OK	2.598	2.616	0.0305	2.6288	2.6162	4.3768	968	2.607	2.628	0.0441	2.6511	2.6278	4.5778	9505
Pilot_screen_BYxRM	haploid-R1	P8	C22	YBR066C	BY	Haploid	OK	2.91	2.916	0.0197	2.9374	2.9158	5.4336	1396	2.948	2.927	0.048	3.0152	2.9265	5.9678	14336
Pilot_screen_BYxRM	haploid-R1	P8	C22	YBR066C	RM	Haploid	OK	2.906	2.91	0.0205	2.9361	2.9096	5.54	719	2.929	2.927	0.0356	2.9731	2.9265	5.4919	6711
Pilot_screen_BYxRM	haploid-R2	P8	P5,P6	YBR067C	BY	Haploid	OK	3.392	3.504	0.2773	3.6493	3.5039	7.2765	1445	3.348	3.423	0.2048	3.5464	3.4234	7.041	14533
Pilot_screen_BYxRM	haploid-R2	P8	P5,P6	YBR067C	RM	Haploid	OK	3.413	3.498	0.1889	3.5865	3.4976	7.0069	982	3.352	3.453	0.2418	3.5724	3.453	7.1316	9137
Pilot_screen_BYxRM	haploid-R1	P8	O6	YBR067C	BY	Haploid	OK	3.618	3.675	0.1018	3.7163	3.6753	7.003	865	3.565	3.614	0.1168	3.6829	3.6145	7.0962	8840
Pilot_screen_BYxRM	haploid-R1	P8	O6	YBR067C	RM	Haploid	OK	3.602	3.622	0.0949	3.7043	3.6221	7.1169	467	3.566	3.586	0.1241	3.698	3.5861	7.2193	4393
Pilot_screen_BYxRM	haploid-R2	P10	M17,M18	YBR068C	BY	Haploid	OK	3.56	3.667	0.1299	3.6463	3.6665	6.5733	1535	3.559	3.655	0.1487	3.6767	3.6552	6.9839	14385
Pilot_screen_BYxRM	haploid-R2	P10	M17,M18	YBR068C	RM	Haploid	OK	3.529	3.637	0.1341	3.6275	3.6365	6.6337	1571	3.414	3.59	0.214	3.5783	3.5905	6.793	14629
Pilot_screen_BYxRM	haploid-R1	P10	N17	YBR068C	BY	Haploid	OK	3.734	3.817	0.0863	3.799	3.8172	6.8003	783	3.722	3.809	0.1151	3.8196	3.809	7.1987	8250
Pilot_screen_BYxRM	haploid-R1	P10	N17	YBR068C	RM	Haploid	OK	3.852	3.892	0.0496	3.889	3.8922	6.7393	753	3.797	3.87	0.0879	3.8631	3.8699	6.9634	6925
Pilot_screen_BYxRM	fillin	Haploid-fillin_P1	C02	YBR068C	BY	Haploid	NA	3.863	3.933	0.1113	3.9657	3.9327	7.621	958	3.878	3.916	0.1224	3.9952	3.9162	7.751	9446
Pilot_screen_BYxRM	fillin	Haploid-fillin_P1	C02	YBR068C	RM	Haploid	NA	3.934	4	0.0802	3.9938	4	7.1652	1673	3.884	3.951	0.092	3.9556	3.9509	7.2251	10704
Pilot_screen_BYxRM	haploid-R2	P10	C21,C22	YBR069C	BY	Haploid	OK	3.103	3.229	0.1143	3.2048	3.2286	5.9073	1107	3.079	3.125	0.1027	3.1758	3.125	5.9151	12074
Pilot_screen_BYxRM	haploid-R2	P10	C21,C22	YBR069C	RM	Haploid	OK	3.105	3.146	0.0543	3.1564	3.1463	5.5877	2003	3.086	3.127	0.0778	3.1594	3.1267	5.7774	18936
Pilot_screen_BYxRM	haploid-R1	P10	D21	YBR069C	BY	Haploid	OK	3.344	3.38	0.0396	3.3839	3.3804	5.9693	845	3.333	3.363	0.051	3.3858	3.3634	6.1565	9226
Pilot_screen_BYxRM	haploid-R1	P10	D21	YBR069C	RM	Haploid	OK	3.253	3.259	0.0256	3.2816	3.2594	5.6855	632	3.268	3.276	0.04	3.3118	3.276	5.95	5509
Pilot_screen_BYxRM	haploid-R2	P11	L1,L2	YBR070C	BY	Haploid	OK	2.639	2.655	0.0287	2.6703	2.6553	4.539	1439	2.681	2.677	0.0584	2.7468	2.6775	5.0641	14216
Pilot_screen_BYxRM	haploid-R2	P11	L1,L2	YBR070C	RM	Haploid	OK	2.593	2.604	0.0339	2.6281	2.604	4.4419	1117	2.595	2.621	0.0547	2.6475	2.6214	4.6415	10784
Pilot_screen_BYxRM	haploid-R1	P11	K2	YBR070C	BY	Haploid	OK	2.968	2.964	0.018	2.9926	2.9637	5.3355	559	3.019	2.976	0.057	3.0985	2.9762	5.9872	5897
Pilot_screen_BYxRM	haploid-R1	P11	K2	YBR070C	RM	Haploid	OK	2.955	2.957	0.0163	2.9759	2.9568	5.0892	411	2.974	2.975	0.0317	3.0126	2.9747	5.4357	3808
Pilot_screen_BYxRM	haploid-R2	P8	N7,N8	YBR071W	BY	Haploid	OK	2.687	2.704	0.0307	2.7192	2.7042	4.645	1454	2.714	2.722	0.0622	2.7804	2.7217	5.0777	14408
Pilot_screen_BYxRM	haploid-R2	P8	N7,N8	YBR071W	RM	Haploid	OK	2.649	2.67	0.032	2.6841	2.6705	4.5535	942	2.632	2.66	0.0587	2.6904	2.6599	4.7805	8772
Pilot_screen_BYxRM	haploid-R1	P8	M8	YBR071W	BY	Haploid	OK	2.935	2.946	0.0241	2.9688	2.9459	5.541	939	2.959	2.948	0.053	3.0275	2.9484	5.8543	10040
Pilot_screen_BYxRM	haploid-R1	P8	M8	YBR071W	RM	Haploid	OK	2.956	2.965	0.0217	2.9813	2.9651	5.1248	610	2.954	2.967	0.0417	3.0075	2.9668	6.0426	5346
Pilot_screen_BYxRM	haploid-R2	P8	L11,L12	YBR072W	BY	Haploid	Bad-var	3.546	3.462	0.5318	4.303	3.4622	9.4342	1518	3.708	3.509	0.8122	4.6103	3.5089	9.8138	15136
Pilot_screen_BYxRM	haploid-R2	P8	L11,L12	YBR072W	RM	Haploid	Bad-var	3.154	3.18	0.1447	3.3097	3.1801	6.633	1187	3.092	3.104	0.1839	3.3279	3.1045	7.5305	10876
Pilot_screen_BYxRM	haploid-R1	P8	K12	YBR072W	BY	Haploid	Bad-var	3.568	3.58	0.1805	3.8889	3.5796	8.7614	814	3.658	3.548	0.408	4.3612	3.5476	9.5774	9082
Pilot_screen_BYxRM	haploid-R1	P8	K12	YBR072W	RM	Haploid	Bad-var	3.325	3.302	0.1266	3.553	3.3021	8.0588	770	3.331	3.306	0.1495	3.6116	3.3059	8.2927	6620
Pilot_screen_BYxRM	haploid-R2	P1	D11,D12	YBR073W	BY	Haploid	OK	3.072	3.088	0.0268	3.1014	3.088	5.3659	1958	3.096	3.099	0.0467	3.1486	3.0988	5.7845	19595
Pilot_screen_BYxRM	haploid-R2	P1	D11,D12	YBR073W	RM	Haploid	OK	3.061	3.077	0.0373	3.0965	3.0773	5.3727	1684	3.079	3.089	0.0463	3.1279	3.0886	5.6152	16477
Pilot_screen_BYxRM	haploid-R1	P1	D12	YBR073W	BY	Haploid	OK	2.986	2.996	0.0168	3.007	2.9956	5.1492	1100	3.015	3.004	0.0398	3.064	3.0039	5.7094	11186
Pilot_screen_BYxRM	haploid-R1	P1	D12	YBR073W	RM	Haploid	OK	2.969	2.973	0.0274	3.0005	2.9735	5.2403	378	3.001	3.002	0.0389	3.0512	3.0022	6.0569	3485
Pilot_screen_BYxRM	haploid-R2	P9	E19,E20	YBR077C	BY	Haploid	OK	2.963	2.992	0.0392	3.0039	2.992	5.2702	1773	3.001	2.997	0.0752	3.0844	2.9971	5.8075	17491
Pilot_screen_BYxRM	haploid-R2	P9	E19,E20	YBR077C	RM	Haploid	OK	2.915	2.924	0.0332	2.9508	2.9238	5.1219	1533	2.946	2.952	0.0513	3.0023	2.9516	5.4442	14905
Pilot_screen_BYxRM	haploid-R1	P9	E19	YBR077C	BY	Haploid	OK	3.153	3.158	0.0229	3.1802	3.1585	5.5333	1302	3.176	3.165	0.0452	3.2307	3.1651	5.981	12752
Pilot_screen_BYxRM	haploid-R1	P9	E19	YBR077C	RM	Haploid	Bad-count	3.176	3.257	0.0574	3.2413	3.2573	6.0667	18	3.259	3.294	0.0931	3.3537	3.2939	6.3032	401
Pilot_screen_BYxRM	fillin	Haploid-fillin_P1	C03	YBR077C	BY	Haploid	NA	3.333	3.319	0.0436	3.3858	3.3189	6.261	971	3.337	3.292	0.0827	3.4359	3.2925	6.6193	10558
Pilot_screen_BYxRM	fillin	Haploid-fillin_P1	C03	YBR077C	RM	Haploid	NA	3.223	3.23	0.0211	3.2464	3.2301	5.5301	1170	3.188	3.18	0.0425	3.2389	3.1802	5.9565	8589
Pilot_screen_BYxRM	haploid-R2	P1	B13,B14	YBR079C	BY	Haploid	OK	4.041	4.082	0.0491	4.0753	4.0819	7.0633	2024	4.038	4.07	0.0641	4.0886	4.0696	7.3847	19938
Pilot_screen_BYxRM	haploid-R2	P1	B13,B14	YBR079C	RM	Haploid	OK	4.088	4.124	0.062	4.1307	4.1242	7.3176	1301	4.081	4.118	0.0794	4.1444	4.1185	7.6135	12889
Pilot_screen_BYxRM	haploid-R1	P1	B14	YBR079C	BY	Haploid	OK	3.926	3.999	0.0709	3.9773	3.9989	7.0149	1243	3.896	3.956	0.0888	3.9674	3.9557	7.2636	13638
Pilot_screen_BYxRM	haploid-R1	P1	B14	YBR079C	RM	Haploid	OK	3.959	4.017	0.0649	4.0065	4.0171	7.0519	1097	3.971	4.021	0.0803	4.0358	4.021	7.3738	9685
Pilot_screen_BYxRM	haploid-R2	P10	P11,P12	YBR080C	BY	Haploid	OK	3.097	3.137	0.051	3.147	3.1375	5.5971	631	3.099	3.13	0.1002	3.1988	3.1298	6.0346	6740
Pilot_screen_BYxRM	haploid-R2	P10	P11,P12	YBR080C	RM	Haploid	OK	3.027	3.045	0.0265	3.0533	3.0453	5.1361	1281	3.008	3.035	0.0507	3.057	3.0353	5.4423	11649
Pilot_screen_BYxRM	haploid-R1	P10	O12	YBR080C	BY	Haploid	OK	3.282	3.291	0.0186	3.3017	3.2906	5.563	681	3.299	3.294	0.042	3.3503	3.2942	6.2057	6999
Pilot_screen_BYxRM	haploid-R1	P10	O12	YBR080C	RM	Haploid	OK	3.215	3.218	0.017	3.2343	3.2181	5.404	338	3.232	3.242	0.0391	3.275	3.2424	5.8977	3209
Pilot_screen_BYxRM	fillin	Haploid-fillin_P1	C04	YBR080C	BY	Haploid	NA	3.414	3.401	0.0304	3.4501	3.4013	6.2084	864	3.418	3.38	0.0568	3.4882	3.3796	6.5886	9748
Pilot_screen_BYxRM	fillin	Haploid-fillin_P1	C04	YBR080C	RM	Haploid	NA	3.315	3.319	0.0184	3.3345	3.3193	5.6079	1138	3.278	3.284	0.0341	3.3165	3.2838	5.9153	8268
Pilot_screen_BYxRM	haploid-R2	P1	L19,L20	YBR081C	BY	Haploid	OK	3.119	3.121	0.0256	3.148	3.1213	5.4513	706	3.157	3.15	0.0484	3.217	3.1505	6.0719	6908
Pilot_screen_BYxRM	haploid-R2	P1	L19,L20	YBR081C	RM	Haploid	OK	3.092	3.103	0.0282	3.1216	3.1034	5.3809	879	3.103	3.115	0.0424	3.147	3.1146	5.6153	8258
Pilot_screen_BYxRM	haploid-R1	P1	K20	YBR081C	BY	Haploid	OK	3.037	3.036	0.0197	3.0634	3.0362	5.4631	458	3.09	3.05	0.0554	3.1668	3.0501	6.1418	5203
Pilot_screen_BYxRM	haploid-R1	P1	K20	YBR081C	RM	Haploid	OK	3.006	3.009	0.0144	3.0236	3.0091	5.0723	792	3.01	3.007	0.0267	3.0425	3.0069	5.4411	7278
Pilot_screen_BYxRM	haploid-R2	P8	D15,D16	YBR082C	BY	Haploid	OK	3.483	3.601	0.1319	3.5771	3.6007	6.4799	1571	3.455	3.567	0.1407	3.5603	3.5668	6.5684	15626
Pilot_screen_BYxRM	haploid-R2	P8	D15,D16	YBR082C	RM	Haploid	OK	3.514	3.59	0.0907	3.5794	3.5896	6.3393	1290	3.456	3.57	0.1518	3.5697	3.5699	6.6087	12118
Pilot_screen_BYxRM	haploid-R1	P8	D16	YBR082C	BY	Haploid	OK	3.582	3.635	0.0511	3.6261	3.6349	6.4028	1179	3.555	3.613	0.0813	3.6274	3.6134	6.6614	12587
Pilot_screen_BYxRM	haploid-R1	P8	D16	YBR082C	RM	Haploid	OK	3.61	3.634	0.0261	3.6338	3.6342	6.1596	1018	3.588	3.616	0.0572	3.6413	3.6161	6.6016	9403
Pilot_screen_BYxRM	haploid-R2	P4	J09	YBR083W	BY	Haploid	OK	2.877	2.88	0.0395	2.9452	2.8804	6.0504	706	2.899	2.896	0.0434	2.9848	2.896	7.077	7377
Pilot_screen_BYxRM	haploid-R2	P4	J09	YBR083W	RM	Haploid	OK	2.816	2.83	0.0409	2.8624	2.8301	5.2227	426	2.832	2.844	0.0411	2.8799	2.8441	5.3813	3868
Pilot_screen_BYxRM	haploid-R1	P4	J9	YBR083W	BY	Haploid	OK	2.904	2.887	0.0325	2.951	2.8874	5.5595	255	2.953	2.933	0.0582	3.0271	2.9333	5.8501	3414
Pilot_screen_BYxRM	haploid-R1	P4	J9	YBR083W	RM	Haploid	OK	2.846	2.856	0.0208	2.8738	2.8556	5.3164	820	2.849	2.854	0.032	2.8901	2.8544	5.4098	7333
Pilot_screen_BYxRM	fillin	Haploid-fillin_P1	C05	YBR083W	BY	Haploid	NA	3.027	3.005	0.03	3.0661	3.005	5.5789	1557	3.065	3.022	0.0721	3.1541	3.0219	6.0298	13395
Pilot_screen_BYxRM	fillin	Haploid-fillin_P1	C05	YBR083W	RM	Haploid	NA	2.942	2.947	0.0187	2.9647	2.9468	5.0199	1221	2.916	2.912	0.0361	2.9582	2.9116	5.284	7964
Pilot_screen_BYxRM	haploid-R2	P6	K22	YBR084C-A	BY	Haploid	OK	4.031	4.133	0.0887	4.0996	4.1329	7.4363	322	4.006	4.095	0.0879	4.0756	4.0946	7.4288	4059
Pilot_screen_BYxRM	haploid-R2	P6	K22	YBR084C-A	RM	Haploid	OK	4.037	4.118	0.1032	4.1047	4.1175	7.3477	406	4.046	4.137	0.1201	4.1246	4.1371	7.464	3158
Pilot_screen_BYxRM	haploid-R1	P6	K22	YBR084C-A	BY	Haploid	OK	3.824	3.893	0.0803	3.8806	3.8928	6.8659	1096	3.776	3.862	0.1027	3.8541	3.8616	7.0282	10868
Pilot_screen_BYxRM	haploid-R1	P6	K22	YBR084C-A	RM	Haploid	OK	3.909	3.984	0.0821	3.965	3.9842	7.0082	455	3.864	3.961	0.1271	3.9535	3.9615	7.2335	4589
Pilot_screen_BYxRM	haploid-R2	P1	H15,H16	YBR084W	BY	Haploid	OK	3.357	3.371	0.0226	3.381	3.371	5.8011	1524	3.358	3.372	0.0328	3.3925	3.3719	6.0187	15104
Pilot_screen_BYxRM	haploid-R2	P1	H15,H16	YBR084W	RM	Haploid	OK	3.337	3.347	0.023	3.3624	3.347	5.7741	1290	3.344	3.356	0.0367	3.3828	3.3561	6.0137	12372
Pilot_screen_BYxRM	haploid-R1	P1	H16	YBR084W	BY	Haploid	OK	3.251	3.271	0.0254	3.278	3.2713	5.6354	679	3.247	3.261	0.0368	3.287	3.2609	5.8899	7830
Pilot_screen_BYxRM	haploid-R1	P1	H16	YBR084W	RM	Haploid	OK	3.279	3.293	0.0251	3.3053	3.293	5.6427	1028	3.286	3.301	0.0361	3.3235	3.3014	5.8678	9199
Pilot_screen_BYxRM	haploid-R2	P9	H17,H18	YBR085C-A	BY	Haploid	OK	3.478	3.537	0.0928	3.5521	3.5369	6.4921	1591	3.452	3.507	0.1123	3.5485	3.5066	6.6923	15842
Pilot_screen_BYxRM	haploid-R2	P9	H17,H18	YBR085C-A	RM	Haploid	OK	3.427	3.459	0.0573	3.4771	3.4594	6.1987	1725	3.44	3.469	0.0939	3.5233	3.4687	6.6055	16892
Pilot_screen_BYxRM	haploid-R1	P9	H18	YBR085C-A	BY	Haploid	OK	3.582	3.61	0.0509	3.6308	3.6103	6.5569	999	3.577	3.596	0.0784	3.6582	3.5957	6.9547	10402
Pilot_screen_BYxRM	haploid-R1	P9	H18	YBR085C-A	RM	Haploid	OK	3.594	3.617	0.0448	3.6388	3.6166	6.561	796	3.596	3.617	0.0672	3.6646	3.6167	6.963	7497
Pilot_screen_BYxRM	haploid-R2	P11	N17,N18	YBR085W	BY	Haploid	OK	2.577	2.598	0.0291	2.6092	2.5984	4.4216	1141	2.629	2.621	0.0669	2.7036	2.6214	5.0116	11664
Pilot_screen_BYxRM	haploid-R2	P11	N17,N18	YBR085W	RM	Haploid	OK	2.466	2.496	0.0595	2.5224	2.4958	4.4113	1045	2.493	2.527	0.0702	2.5585	2.5275	4.569	10071
Pilot_screen_BYxRM	haploid-R1	P11	M18	YBR085W	BY	Haploid	OK	2.923	2.931	0.0151	2.9397	2.9314	4.7935	767	2.954	2.931	0.0458	3.016	2.9309	5.7326	7905
Pilot_screen_BYxRM	haploid-R1	P11	M18	YBR085W	RM	Haploid	OK	2.861	2.868	0.0273	2.8933	2.8684	5.0282	499	2.873	2.87	0.0421	2.9227	2.8702	5.3373	4724
Pilot_screen_BYxRM	fillin	Haploid-fillin_P1	C06	YBR085W	BY	Haploid	NA	3.037	3.014	0.034	3.0794	3.0137	5.6126	1281	3.079	3.043	0.0669	3.1591	3.0427	5.9817	10856
Pilot_screen_BYxRM	fillin	Haploid-fillin_P1	C06	YBR085W	RM	Haploid	NA	2.923	2.921	0.0234	2.9499	2.9211	5.039	1298	2.897	2.898	0.0425	2.9462	2.8982	5.3164	8851
Pilot_screen_BYxRM	haploid-R2	P10	G3,G4	YBR086C	BY	Haploid	OK	3.029	3.046	0.0302	3.0617	3.0461	5.3948	835	3.045	3.036	0.0772	3.1387	3.0361	6.1045	8255
Pilot_screen_BYxRM	haploid-R2	P10	G3,G4	YBR086C	RM	Haploid	OK	2.982	3.004	0.0327	3.0125	3.0039	5.0799	1740	2.978	2.997	0.0475	3.0255	2.9966	5.3727	16335
Pilot_screen_BYxRM	haploid-R1	P10	G3	YBR086C	BY	Haploid	OK	3.226	3.225	0.0234	3.2555	3.2252	5.8903	793	3.282	3.235	0.0664	3.381	3.235	6.7358	8441
Pilot_screen_BYxRM	haploid-R1	P10	G3	YBR086C	RM	Haploid	OK	3.135	3.146	0.0148	3.1508	3.1461	5.1452	857	3.15	3.148	0.0344	3.189	3.1484	5.7136	7996
Pilot_screen_BYxRM	fillin	Haploid-fillin_P1	C07	YBR086C	BY	Haploid	NA	3.389	3.377	0.0496	3.4493	3.377	6.4919	1609	3.428	3.371	0.0854	3.5333	3.3712	6.8602	13895
Pilot_screen_BYxRM	fillin	Haploid-fillin_P1	C07	YBR086C	RM	Haploid	NA	3.254	3.26	0.0237	3.28	3.26	5.6256	1058	3.226	3.223	0.0403	3.2716	3.2232	5.9384	7331
Pilot_screen_BYxRM	haploid-R2	P7	A5,A6	YBR088C	BY	Haploid	OK	2.577	2.581	0.0236	2.6052	2.5816	4.3978	1078	2.599	2.602	0.0468	2.655	2.602	5.1967	10260
Pilot_screen_BYxRM	haploid-R2	P7	A5,A6	YBR088C	RM	Haploid	OK	2.6	2.625	0.0407	2.6415	2.6246	4.5695	963	2.599	2.62	0.0589	2.6765	2.6204	5.7455	9213
Pilot_screen_BYxRM	haploid-R1	P7	B5	YBR088C	BY	Haploid	Bad-count	2.979	2.981	0.0199	3.0031	2.9812	5.1501	230	3.022	2.991	0.0559	3.0928	2.9909	5.865	2466
Pilot_screen_BYxRM	haploid-R1	P7	B5	YBR088C	RM	Haploid	Bad-count	3.002	2.977	0.0257	3.0367	2.9766	5.4498	83	3.02	3.009	0.0411	3.0722	3.0087	5.7385	700
Pilot_screen_BYxRM	fillin	Haploid-fillin_P1	C08	YBR088C	BY	Haploid	NA	3.039	3.013	0.0367	3.0858	3.0129	5.6632	1247	3.142	3.132	0.0707	3.2227	3.1316	6.0637	10900
Pilot_screen_BYxRM	fillin	Haploid-fillin_P1	C08	YBR088C	RM	Haploid	NA	2.931	2.929	0.0237	2.9609	2.9291	5.2248	720	2.963	2.954	0.0449	3.0164	2.9539	5.541	4180
Pilot_screen_BYxRM	haploid-R2	P9	G1,G2	YBR089C-A	BY	Haploid	OK	3.315	3.348	0.0518	3.3588	3.3477	5.9005	1926	3.352	3.351	0.0791	3.4353	3.3514	6.5603	19011
Pilot_screen_BYxRM	haploid-R2	P9	G1,G2	YBR089C-A	RM	Haploid	OK	3.314	3.346	0.041	3.3478	3.3461	5.7226	973	3.305	3.345	0.0624	3.3557	3.3449	5.9331	9453
Pilot_screen_BYxRM	haploid-R1	P9	H1	YBR089C-A	BY	Haploid	OK	3.484	3.483	0.0386	3.5257	3.4829	6.3703	803	3.485	3.482	0.063	3.555	3.4822	6.7133	8198
Pilot_screen_BYxRM	haploid-R1	P9	H1	YBR089C-A	RM	Haploid	OK	3.463	3.475	0.0302	3.4914	3.4753	6.0374	718	3.449	3.465	0.0446	3.4919	3.4646	6.2548	6917
Pilot_screen_BYxRM	haploid-R2	P7	D1,D2	YBR090C	BY	Haploid	OK	3.371	3.451	0.077	3.4325	3.4512	6.0867	962	3.381	3.446	0.1014	3.467	3.4461	6.4048	9654
Pilot_screen_BYxRM	haploid-R2	P7	D1,D2	YBR090C	RM	Haploid	OK	3.416	3.442	0.0479	3.4551	3.4417	6.0306	1710	3.427	3.452	0.0651	3.4841	3.4516	6.3322	16932
Pilot_screen_BYxRM	haploid-R1	P7	D2	YBR090C	BY	Haploid	OK	3.566	3.58	0.0379	3.6064	3.5796	6.5931	689	3.562	3.571	0.0504	3.6173	3.5711	6.7138	7400
Pilot_screen_BYxRM	haploid-R1	P7	D2	YBR090C	RM	Haploid	OK	3.565	3.584	0.0376	3.608	3.5837	6.7787	278	3.587	3.605	0.0528	3.6449	3.6047	6.9091	2318
Pilot_screen_BYxRM	haploid-R2	P4	B16	YBR092C	BY	Haploid	OK	2.791	2.819	0.0392	2.8311	2.8191	4.91	807	2.814	2.832	0.0413	2.859	2.8324	5.3593	8255
Pilot_screen_BYxRM	haploid-R2	P4	B16	YBR092C	RM	Haploid	OK	2.747	2.774	0.0411	2.7995	2.7737	5.471	496	2.762	2.783	0.0479	2.8144	2.783	5.3634	4587
Pilot_screen_BYxRM	haploid-R1	P4	B16	YBR092C	BY	Haploid	OK	2.95	2.942	0.0239	2.9849	2.9419	5.5421	629	3.002	2.979	0.0559	3.073	2.9789	5.8614	7745
Pilot_screen_BYxRM	haploid-R1	P4	B16	YBR092C	RM	Haploid	OK	2.884	2.887	0.0205	2.9124	2.8872	5.3822	1298	2.894	2.892	0.0376	2.9402	2.892	5.4607	11409
Pilot_screen_BYxRM	fillin	Haploid-fillin_P1	C09	YBR092C	BY	Haploid	NA	3.027	3.013	0.028	3.062	3.0127	5.4536	1656	3.08	3.045	0.0657	3.1589	3.0455	5.9719	13688
Pilot_screen_BYxRM	fillin	Haploid-fillin_P1	C09	YBR092C	RM	Haploid	NA	2.993	2.986	0.0227	3.0198	2.9862	5.1912	1140	2.975	2.969	0.0452	3.0274	2.969	5.5136	7322
Pilot_screen_BYxRM	haploid-R2	P4	P14	YBR093C	BY	Haploid	OK	2.795	2.82	0.0328	2.8325	2.8197	5.0326	274	2.831	2.83	0.0423	2.8858	2.8305	5.6616	2829
Pilot_screen_BYxRM	haploid-R2	P4	P14	YBR093C	RM	Haploid	OK	2.681	2.707	0.0837	2.757	2.7066	5.5256	513	2.697	2.72	0.0788	2.7997	2.7196	6.2591	4999
Pilot_screen_BYxRM	haploid-R1	P4	P14	YBR093C	BY	Haploid	OK	2.876	2.878	0.0178	2.8982	2.8777	4.9356	365	2.945	2.935	0.044	3.0095	2.9348	6.5762	3666
Pilot_screen_BYxRM	haploid-R1	P4	P14	YBR093C	RM	Haploid	OK	2.813	2.813	0.0257	2.8436	2.8126	4.9484	274	2.79	2.788	0.0463	2.8793	2.7883	6.7827	2705
Pilot_screen_BYxRM	fillin	Haploid-fillin_P1	C10	YBR093C	BY	Haploid	NA	3.011	2.993	0.0333	3.0537	2.9933	5.6067	1102	3.066	3.03	0.0739	3.1542	3.0303	6.0009	10981
Pilot_screen_BYxRM	fillin	Haploid-fillin_P1	C10	YBR093C	RM	Haploid	NA	2.892	2.891	0.0226	2.9192	2.8911	5.066	1552	2.865	2.863	0.0417	2.9135	2.8629	5.2723	9777
Pilot_screen_BYxRM	haploid-R2	P2	K10,K9	YBR094W	BY	Haploid	OK	3.177	3.174	0.0295	3.214	3.1737	5.8487	1688	3.234	3.194	0.0693	3.3194	3.1935	6.3473	17020
Pilot_screen_BYxRM	haploid-R2	P2	K10,K9	YBR094W	RM	Haploid	OK	3.105	3.122	0.024	3.1298	3.122	5.3051	1227	3.11	3.118	0.0396	3.1522	3.1183	5.6051	11738
Pilot_screen_BYxRM	haploid-R1	P2	L9	YBR094W	BY	Haploid	Bad-count	3.156	3.138	0.0237	3.1899	3.1376	5.8443	107	3.211	3.152	0.0867	3.3182	3.1523	6.4291	1722
Pilot_screen_BYxRM	haploid-R1	P2	L9	YBR094W	RM	Haploid	OK	3.047	3.05	0.0127	3.0616	3.0497	4.9257	541	3.053	3.058	0.0287	3.0856	3.0582	5.3992	4682
Pilot_screen_BYxRM	fillin	Haploid-fillin_P1	C11	YBR094W	BY	Haploid	NA	3.169	3.15	0.0261	3.2021	3.1505	5.7315	1632	3.192	3.148	0.0575	3.2638	3.1477	6.1644	14033
Pilot_screen_BYxRM	fillin	Haploid-fillin_P1	C11	YBR094W	RM	Haploid	NA	3.096	3.098	0.0173	3.1156	3.0982	5.1978	1001	3.068	3.065	0.0334	3.1068	3.0648	5.5355	6538
Pilot_screen_BYxRM	haploid-R2	P5	M19	YBR095C	BY	Haploid	Bad-var	3.1	3.12	0.0229	3.1257	3.1197	5.4663	349	3.102	3.115	0.0262	3.1356	3.1149	5.9318	3545
Pilot_screen_BYxRM	haploid-R2	P5	M19	YBR095C	RM	Haploid	Bad-var	3.053	3.055	0.0241	3.0951	3.0552	6.2138	278	3.064	3.075	0.0272	3.099	3.0754	5.9295	2681
Pilot_screen_BYxRM	haploid-R1	P5	M19	YBR095C	BY	Haploid	Bad-var	3.069	3.07	0.0136	3.0863	3.0699	5.2063	456	3.133	3.09	0.0527	3.2022	3.09	6.0849	5711
Pilot_screen_BYxRM	haploid-R1	P5	M19	YBR095C	RM	Haploid	Bad-var	2.995	3.005	0.0144	3.0112	3.0048	4.8983	930	2.999	3.007	0.0241	3.0268	3.0069	5.1895	8056
Pilot_screen_BYxRM	haploid-R2	P8	G10,G9	YBR096W	BY	Haploid	OK	2.759	2.767	0.0202	2.7825	2.7668	4.7396	973	2.777	2.78	0.0529	2.8395	2.7802	5.4012	9664
Pilot_screen_BYxRM	haploid-R2	P8	G10,G9	YBR096W	RM	Haploid	OK	2.703	2.718	0.026	2.7323	2.7179	4.6483	1424	2.687	2.706	0.0475	2.7367	2.7059	4.8702	12916
Pilot_screen_BYxRM	haploid-R1	P8	G9	YBR096W	BY	Haploid	OK	2.977	2.968	0.0202	3.0074	2.9677	5.4991	609	3.02	2.99	0.0542	3.0933	2.9898	5.9366	6617
Pilot_screen_BYxRM	haploid-R1	P8	G9	YBR096W	RM	Haploid	OK	2.94	2.938	0.0141	2.9571	2.9384	4.8634	625	2.948	2.942	0.0333	2.988	2.9419	5.3444	5667
Pilot_screen_BYxRM	haploid-R2	P10	K19,K20	YBR097W	BY	Haploid	OK	2.699	2.698	0.0275	2.732	2.6979	4.7272	1238	2.74	2.727	0.07	2.8159	2.7271	5.2017	12529
Pilot_screen_BYxRM	haploid-R2	P10	K19,K20	YBR097W	RM	Haploid	OK	2.567	2.583	0.0286	2.5968	2.5835	4.2889	1698	2.571	2.593	0.0481	2.6193	2.593	4.5625	16406
Pilot_screen_BYxRM	haploid-R1	P10	K19	YBR097W	BY	Haploid	OK	2.944	2.934	0.0295	2.9883	2.9338	5.7362	595	3.037	2.982	0.0728	3.1334	2.9816	6.1169	6499
Pilot_screen_BYxRM	haploid-R1	P10	K19	YBR097W	RM	Haploid	OK	2.917	2.922	0.0223	2.9422	2.9219	5.0128	911	2.932	2.932	0.0364	2.975	2.9318	5.3804	8395
Pilot_screen_BYxRM	fillin	Haploid-fillin_P1	C12	YBR097W	BY	Haploid	NA	3.048	3.034	0.0258	3.0814	3.0341	5.5412	1311	3.084	3.041	0.0642	3.1623	3.0406	5.9899	11214
Pilot_screen_BYxRM	fillin	Haploid-fillin_P1	C12	YBR097W	RM	Haploid	NA	2.966	2.972	0.0181	2.9867	2.9719	5.0048	1346	2.934	2.931	0.0354	2.9749	2.9314	5.2982	8389
Pilot_screen_BYxRM	haploid-R2	P9	E15,E16	YBR100W	BY	Haploid	OK	2.589	2.6	0.0269	2.6198	2.5999	4.5347	2199	2.624	2.621	0.058	2.6913	2.6211	5.0473	21861
Pilot_screen_BYxRM	haploid-R2	P9	E15,E16	YBR100W	RM	Haploid	OK	2.51	2.532	0.0323	2.5436	2.5317	4.2302	1975	2.521	2.545	0.0513	2.5738	2.5449	4.5938	19316
Pilot_screen_BYxRM	haploid-R1	P9	F15	YBR100W	BY	Haploid	OK	2.872	2.875	0.0215	2.9005	2.8748	5.1804	897	2.901	2.878	0.049	2.9649	2.8783	5.6294	9758
Pilot_screen_BYxRM	haploid-R1	P9	F15	YBR100W	RM	Haploid	OK	2.819	2.825	0.0258	2.8521	2.8246	5.1396	791	2.843	2.846	0.0424	2.8941	2.8463	5.3183	7009
Pilot_screen_BYxRM	haploid-R2	P7	J21,J22	YBR101C	BY	Haploid	Bad-mean	3.588	3.651	0.0766	3.6384	3.6509	6.2925	1417	3.578	3.64	0.0851	3.6391	3.6401	6.4837	13931
Pilot_screen_BYxRM	haploid-R2	P7	J21,J22	YBR101C	RM	Haploid	Bad-mean	3.657	3.722	0.0898	3.7155	3.722	6.5502	1327	3.606	3.696	0.1316	3.6975	3.6961	6.752	12876
Pilot_screen_BYxRM	haploid-R1	P7	I22	YBR101C	BY	Haploid	Bad-mean	3.498	3.569	0.0588	3.5475	3.5685	6.243	401	3.47	3.532	0.0793	3.5462	3.5317	6.591	4027
Pilot_screen_BYxRM	haploid-R1	P7	I22	YBR101C	RM	Haploid	Bad-count-mean	3.65	3.695	0.049	3.6921	3.6955	6.5765	167	3.604	3.677	0.079	3.6744	3.6768	6.8028	1646
Pilot_screen_BYxRM	haploid-R2	P2	I10,I9	YBR102C	BY	Haploid	OK	3.116	3.13	0.0261	3.1465	3.1298	5.5745	1753	3.174	3.147	0.0641	3.2524	3.1471	6.1895	17695
Pilot_screen_BYxRM	haploid-R2	P2	I10,I9	YBR102C	RM	Haploid	OK	3.057	3.069	0.0224	3.0807	3.0688	5.224	1159	3.062	3.073	0.039	3.1027	3.0729	5.5168	10871
Pilot_screen_BYxRM	haploid-R1	P2	J9	YBR102C	BY	Haploid	Bad-count	3.146	3.111	0.0321	3.1904	3.1106	5.9088	238	3.185	3.141	0.0669	3.2658	3.1411	6.197	3165
Pilot_screen_BYxRM	haploid-R1	P2	J9	YBR102C	RM	Haploid	OK	3.029	3.028	0.0126	3.0437	3.0284	4.9855	458	3.039	3.036	0.0274	3.0708	3.0362	5.4005	3738
Pilot_screen_BYxRM	haploid-R2	P4	G13	YBR103W	BY	Haploid	OK	2.911	2.921	0.0234	2.9377	2.9214	4.9803	728	2.924	2.931	0.0302	2.9594	2.9309	5.242	7273
Pilot_screen_BYxRM	haploid-R2	P4	G13	YBR103W	RM	Haploid	OK	2.829	2.85	0.0352	2.8682	2.8505	5.1014	449	2.845	2.861	0.0394	2.8928	2.8611	5.5062	4412
Pilot_screen_BYxRM	haploid-R1	P4	G13	YBR103W	BY	Haploid	OK	2.966	2.966	0.0169	2.9875	2.966	5.1471	462	3.015	2.982	0.056	3.088	2.9825	5.896	5611
Pilot_screen_BYxRM	haploid-R1	P4	G13	YBR103W	RM	Haploid	OK	2.904	2.901	0.0164	2.9235	2.9015	4.9063	869	2.904	2.905	0.0304	2.9391	2.9047	5.1853	7586
Pilot_screen_BYxRM	haploid-R2	P11	A5,A6	YBR104W	BY	Haploid	Bad-count-mean	3.126	3.176	0.1087	3.2384	3.1762	6.1405	44	3.042	3.047	0.1073	3.1662	3.0471	6.2025	1021
Pilot_screen_BYxRM	haploid-R2	P11	A5,A6	YBR104W	RM	Haploid	Bad-mean	2.641	2.644	0.0362	2.6834	2.6443	4.8174	294	2.649	2.661	0.0608	2.7135	2.6612	4.9478	2566
Pilot_screen_BYxRM	haploid-R1	P11	A5	YBR104W	BY	Haploid	Bad-mean	2.976	2.963	0.0305	3.0205	2.9635	5.6595	912	3	2.965	0.0671	3.0963	2.9652	6.144	9492
Pilot_screen_BYxRM	haploid-R1	P11	A5	YBR104W	RM	Haploid	Bad-mean	2.949	2.945	0.0241	2.9847	2.9448	5.5565	962	2.969	2.969	0.0435	3.028	2.969	6.2276	9239
Pilot_screen_BYxRM	fillin	Haploid-fillin_P1	C13	YBR104W	BY	Haploid	NA	3.083	3.057	0.0376	3.1343	3.0566	5.8782	1149	3.072	3.023	0.0717	3.1631	3.0232	6.0962	11588
Pilot_screen_BYxRM	fillin	Haploid-fillin_P1	C13	YBR104W	RM	Haploid	NA	3.045	3.043	0.0178	3.0657	3.0427	5.1793	1020	3	3	0.0365	3.0417	3.0001	5.4206	7176
Pilot_screen_BYxRM	haploid-R2	P11	G11,G12	YBR105C	BY	Haploid	Bad-count	2.933	3.081	0.153	3.074	3.0807	5.8336	27	3.15	3.156	0.0769	3.2294	3.1562	5.9955	568
Pilot_screen_BYxRM	haploid-R2	P11	G11,G12	YBR105C	RM	Haploid	Bad-count	2.889	2.921	0.047	2.935	2.9208	5.1316	121	2.876	2.899	0.0622	2.9392	2.8988	5.3312	1030
Pilot_screen_BYxRM	haploid-R1	P11	G11	YBR105C	BY	Haploid	OK	3.241	3.246	0.0231	3.2701	3.2462	5.8944	740	3.251	3.236	0.04	3.3005	3.2364	6.099	7881
Pilot_screen_BYxRM	haploid-R1	P11	G11	YBR105C	RM	Haploid	OK	3.197	3.193	0.0158	3.2155	3.1928	5.4048	514	3.211	3.207	0.0297	3.2448	3.2068	5.7392	4622
Pilot_screen_BYxRM	haploid-R2	P8	N23,N24	YBR106W	BY	Haploid	OK	3.719	3.91	0.2159	3.8551	3.9097	7.0453	472	3.6	3.851	0.2925	3.7993	3.8512	7.1981	4684
Pilot_screen_BYxRM	haploid-R2	P8	N23,N24	YBR106W	RM	Haploid	OK	3.748	3.843	0.1203	3.8227	3.8426	6.7588	723	3.688	3.828	0.2076	3.8194	3.8279	7.0615	7064
Pilot_screen_BYxRM	haploid-R1	P8	N24	YBR106W	BY	Haploid	OK	3.865	3.915	0.0594	3.9095	3.9151	6.8645	1038	3.816	3.882	0.0768	3.8783	3.8818	7.0245	10507
Pilot_screen_BYxRM	haploid-R1	P8	N24	YBR106W	RM	Haploid	OK	3.858	3.9	0.0496	3.8982	3.9003	6.8445	482	3.811	3.892	0.0944	3.8852	3.8924	7.1065	4506
Pilot_screen_BYxRM	fillin	Haploid-fillin_P1	C14	YBR106W	BY	Haploid	NA	3.904	4.014	0.1132	3.9902	4.0141	7.2975	1234	3.864	3.939	0.0927	3.9423	3.939	7.2806	11274
Pilot_screen_BYxRM	fillin	Haploid-fillin_P1	C14	YBR106W	RM	Haploid	NA	3.968	4.021	0.0759	4.0214	4.0207	7.1495	1129	3.918	3.963	0.082	3.9828	3.9634	7.281	8438
Pilot_screen_BYxRM	haploid-R2	P7	B7,B8	YBR107C	BY	Haploid	OK	2.58	2.596	0.0253	2.607	2.5964	4.3602	1082	2.591	2.603	0.0421	2.6373	2.603	4.7092	10773
Pilot_screen_BYxRM	haploid-R2	P7	B7,B8	YBR107C	RM	Haploid	OK	2.534	2.577	0.0708	2.5966	2.5769	4.5664	1885	2.548	2.594	0.0816	2.6201	2.5942	4.6964	18721
Pilot_screen_BYxRM	haploid-R1	P7	B8	YBR107C	BY	Haploid	OK	2.916	2.908	0.0262	2.9599	2.908	5.669	307	2.936	2.914	0.0491	3.0099	2.9137	5.942	3136
Pilot_screen_BYxRM	haploid-R1	P7	B8	YBR107C	RM	Haploid	Bad-count	2.885	2.884	0.0207	2.913	2.8843	5.1647	86	2.92	2.896	0.054	2.9991	2.8965	5.9333	816
Pilot_screen_BYxRM	haploid-R2	P9	A1,A2	YBR109C	BY	Haploid	Bad-mean	3.437	3.63	0.1993	3.6007	3.6299	6.8561	1760	3.447	3.617	0.2482	3.6497	3.6167	7.1079	17634
Pilot_screen_BYxRM	haploid-R2	P9	A1,A2	YBR109C	RM	Haploid	Bad-mean	2.75	2.675	0.1044	2.9033	2.6754	5.8992	821	2.843	2.685	0.2158	3.1236	2.6854	6.4962	8302
Pilot_screen_BYxRM	haploid-R1	P9	A1	YBR109C	BY	Haploid	Bad-mean	3.61	3.685	0.0917	3.6939	3.6849	6.8993	1238	3.618	3.689	0.1155	3.7281	3.6894	7.1176	12300
Pilot_screen_BYxRM	haploid-R1	P9	A1	YBR109C	RM	Haploid	Bad-mean	3.601	3.646	0.0794	3.677	3.6462	6.8222	342	3.607	3.658	0.1079	3.7125	3.6581	7.0726	3468
Pilot_screen_BYxRM	haploid-R2	P10	P7,P8	YBR110W	BY	Haploid	OK	2.84	2.852	0.0177	2.8594	2.8518	4.6424	1442	2.836	2.854	0.0416	2.8807	2.8537	5.0955	14223
Pilot_screen_BYxRM	haploid-R2	P10	P7,P8	YBR110W	RM	Haploid	OK	2.734	2.755	0.0292	2.7643	2.7552	4.6164	1156	2.747	2.768	0.0427	2.7901	2.7678	4.8559	10270
Pilot_screen_BYxRM	haploid-R1	P10	P8	YBR110W	BY	Haploid	OK	3.104	3.104	0.0143	3.1222	3.104	5.3467	813	3.122	3.104	0.0344	3.1669	3.1037	5.8578	8160
Pilot_screen_BYxRM	haploid-R1	P10	P8	YBR110W	RM	Haploid	OK	3.083	3.089	0.0128	3.0986	3.0889	5.1501	355	3.091	3.085	0.0248	3.1205	3.0853	5.4883	3323
Pilot_screen_BYxRM	fillin	Haploid-fillin_P1	C15	YBR110W	BY	Haploid	NA	3.171	3.168	0.019	3.1958	3.1682	5.7253	1519	3.174	3.147	0.0453	3.2311	3.1467	6.0241	12498
Pilot_screen_BYxRM	fillin	Haploid-fillin_P1	C15	YBR110W	RM	Haploid	NA	3.102	3.11	0.0159	3.1197	3.1101	5.1649	1087	3.069	3.067	0.0316	3.1056	3.0675	5.5241	7396
Pilot_screen_BYxRM	haploid-R2	P8	G11,G12	YBR111C	BY	Haploid	OK	2.851	2.852	0.0359	2.8969	2.8519	5.3318	1928	2.922	2.865	0.1009	3.0523	2.8647	6.0726	19166
Pilot_screen_BYxRM	haploid-R2	P8	G11,G12	YBR111C	RM	Haploid	OK	2.735	2.744	0.0239	2.7597	2.7443	4.5504	961	2.718	2.73	0.0435	2.7642	2.7305	4.9111	9107
Pilot_screen_BYxRM	haploid-R1	P8	G11	YBR111C	BY	Haploid	OK	3.014	3.007	0.0259	3.0519	3.0067	5.7059	1054	3.083	3.024	0.0849	3.2078	3.0239	6.4486	11308
Pilot_screen_BYxRM	haploid-R1	P8	G11	YBR111C	RM	Haploid	OK	2.943	2.945	0.0225	2.9717	2.9449	5.238	649	2.97	2.959	0.0428	3.023	2.9593	5.5835	5586
Pilot_screen_BYxRM	haploid-R2	P1	D13,D14	YBR112C	BY	Haploid	OK	3.401	3.416	0.0176	3.4197	3.4163	5.8249	1475	3.407	3.417	0.0292	3.4382	3.4171	6.0441	14834
Pilot_screen_BYxRM	haploid-R2	P1	D13,D14	YBR112C	RM	Haploid	OK	3.469	3.483	0.0176	3.4871	3.4829	5.9264	1847	3.466	3.481	0.0259	3.4927	3.4815	6.0766	18246
Pilot_screen_BYxRM	haploid-R1	P1	D14	YBR112C	BY	Haploid	OK	3.33	3.344	0.0158	3.3471	3.3444	5.635	1006	3.337	3.346	0.0297	3.3699	3.346	6.0241	9879
Pilot_screen_BYxRM	haploid-R1	P1	D14	YBR112C	RM	Haploid	Bad-count	3.192	3.209	0.0422	3.2363	3.2087	5.7507	95	3.179	3.168	0.0592	3.2672	3.1684	6.7628	1080
Pilot_screen_BYxRM	fillin	Haploid-fillin_P1	C16	YBR112C	BY	Haploid	NA	3.373	3.396	0.035	3.411	3.3958	6.1031	1307	3.392	3.389	0.0469	3.4438	3.3887	6.3032	12465
Pilot_screen_BYxRM	fillin	Haploid-fillin_P1	C16	YBR112C	RM	Haploid	NA	3.359	3.395	0.0307	3.3865	3.3951	5.7295	932	3.333	3.376	0.0476	3.3771	3.3761	5.9518	6319
Pilot_screen_BYxRM	haploid-R2	P2	F3,F4	YBR114W	BY	Haploid	OK	3.108	3.103	0.0431	3.1566	3.1035	5.7526	1372	3.141	3.121	0.0825	3.2332	3.1206	6.1617	13844
Pilot_screen_BYxRM	haploid-R2	P2	F3,F4	YBR114W	RM	Haploid	OK	2.919	2.942	0.04	2.9603	2.9424	5.2453	1643	2.925	2.949	0.0534	2.9789	2.9489	5.3804	15545
Pilot_screen_BYxRM	haploid-R1	P2	E4	YBR114W	BY	Haploid	OK	3.03	2.999	0.0377	3.084	2.9987	5.8458	475	3.073	3.026	0.0741	3.1654	3.0256	6.1149	5832
Pilot_screen_BYxRM	haploid-R1	P2	E4	YBR114W	RM	Haploid	OK	2.938	2.939	0.0145	2.9545	2.9389	4.8472	701	2.947	2.946	0.0326	2.9847	2.9464	5.3111	5881
Pilot_screen_BYxRM	haploid-R2	P1	N23,N24	YBR115C	BY	Haploid	OK	3.802	3.833	0.0425	3.8372	3.8331	6.7375	1109	3.799	3.83	0.0611	3.8516	3.8297	7.0043	11047
Pilot_screen_BYxRM	haploid-R2	P1	N23,N24	YBR115C	RM	Haploid	OK	3.744	3.765	0.0391	3.7815	3.7654	6.7473	1228	3.727	3.748	0.0593	3.7869	3.7482	7.0162	11622
Pilot_screen_BYxRM	haploid-R1	P1	M24	YBR115C	BY	Haploid	OK	3.593	3.662	0.0688	3.65	3.6617	6.5169	365	3.58	3.643	0.0858	3.6556	3.6431	6.7834	4622
Pilot_screen_BYxRM	haploid-R1	P1	M24	YBR115C	RM	Haploid	OK	3.624	3.641	0.0339	3.6558	3.6411	6.3879	942	3.607	3.631	0.0537	3.659	3.631	6.6681	8380
Pilot_screen_BYxRM	haploid-R2	P3	G17	YBR117C	BY	Haploid	OK	3.085	3.009	0.0949	3.2239	3.0092	6.5723	434	3.094	3.038	0.0984	3.2434	3.0382	6.7949	4303
Pilot_screen_BYxRM	haploid-R2	P3	G17	YBR117C	RM	Haploid	Bad-count	2.957	2.911	0.1037	3.0993	2.9111	6.3023	131	2.98	2.955	0.1057	3.1555	2.9554	6.9056	1386
Pilot_screen_BYxRM	haploid-R1	P3	G17	YBR117C	BY	Haploid	Bad-count	3.253	3.132	0.1716	3.5306	3.1324	7.5248	237	3.481	3.292	0.3435	3.8786	3.2918	8.058	3448
Pilot_screen_BYxRM	haploid-R1	P3	G17	YBR117C	RM	Haploid	OK	2.97	2.954	0.0448	3.037	2.9538	6.1028	1146	2.975	2.958	0.0585	3.0566	2.9577	6.1424	10343
Pilot_screen_BYxRM	haploid-R2	P11	H7,H8	YBR118W	BY	Haploid	OK	4.587	4.85	0.5058	4.8085	4.8501	8.9492	1635	4.568	4.807	0.5429	4.8182	4.807	9.1761	16474
Pilot_screen_BYxRM	haploid-R2	P11	H7,H8	YBR118W	RM	Haploid	OK	4.73	4.804	0.1918	4.8075	4.8041	8.5631	1620	4.711	4.796	0.2327	4.8144	4.7956	8.8804	15443
Pilot_screen_BYxRM	haploid-R1	P11	H8	YBR118W	BY	Haploid	OK	4.883	4.981	0.2013	4.9756	4.9812	9.0382	733	4.816	4.952	0.3038	4.9664	4.9525	9.3336	7386
Pilot_screen_BYxRM	haploid-R1	P11	H8	YBR118W	RM	Haploid	OK	4.841	4.957	0.2223	4.9416	4.9569	8.9199	676	4.83	4.962	0.2634	4.9574	4.9619	9.1807	6637
Pilot_screen_BYxRM	haploid-R2	P6	L03	YBR119W	BY	Haploid	OK	2.983	2.988	0.0302	3.0171	2.9885	5.2907	306	3.017	3.008	0.0375	3.0689	3.0083	6.3043	3722
Pilot_screen_BYxRM	haploid-R2	P6	L03	YBR119W	RM	Haploid	OK	2.903	2.921	0.0272	2.9315	2.9214	4.9364	353	2.916	2.927	0.0328	2.9532	2.9267	5.3448	2726
Pilot_screen_BYxRM	haploid-R1	P6	L3	YBR119W	BY	Haploid	OK	2.926	2.931	0.016	2.9474	2.9309	5.2122	982	2.935	2.933	0.0307	2.9756	2.9335	5.5547	9590
Pilot_screen_BYxRM	haploid-R1	P6	L3	YBR119W	RM	Haploid	OK	2.885	2.899	0.0184	2.9039	2.8987	4.7528	539	2.891	2.897	0.0275	2.922	2.897	5.1261	5597
Pilot_screen_BYxRM	haploid-R2	P9	C19,C20	YBR120C	BY	Haploid	OK	3.009	3.031	0.0236	3.0319	3.0311	5.0107	2009	3.028	3.033	0.0456	3.0775	3.0332	5.5517	20023
Pilot_screen_BYxRM	haploid-R2	P9	C19,C20	YBR120C	RM	Haploid	OK	2.98	3.001	0.0292	3.0068	3.0012	5.0318	1884	2.989	3.004	0.0442	3.0337	3.0039	5.3629	18015
Pilot_screen_BYxRM	haploid-R1	P9	C19	YBR120C	BY	Haploid	OK	3.204	3.211	0.0145	3.2195	3.2114	5.2742	1733	3.216	3.212	0.0313	3.2523	3.2117	5.8071	17097
Pilot_screen_BYxRM	haploid-R1	P9	C19	YBR120C	RM	Haploid	Bad-count	3.088	3.148	0.0633	3.1536	3.1484	5.7141	18	3.245	3.251	0.0735	3.325	3.2513	6.239	358
Pilot_screen_BYxRM	haploid-R2	P3	A09	YBR121C	BY	Haploid	OK	3.984	4.004	0.0376	4.0181	4.0037	7.1458	946	3.975	4.006	0.0534	4.0215	4.0059	7.2558	9606
Pilot_screen_BYxRM	haploid-R2	P3	A09	YBR121C	RM	Haploid	OK	3.889	3.924	0.0624	3.939	3.9239	7.0853	815	3.934	3.98	0.0733	3.9919	3.9804	7.2335	7871
Pilot_screen_BYxRM	haploid-R1	P3	A9	YBR121C	BY	Haploid	OK	3.901	3.93	0.0343	3.9298	3.9302	6.7984	711	3.9	3.915	0.0502	3.9471	3.9155	7.1483	7506
Pilot_screen_BYxRM	haploid-R1	P3	A9	YBR121C	RM	Haploid	OK	3.865	3.892	0.0367	3.8951	3.8919	6.7686	1317	3.859	3.881	0.059	3.9135	3.8812	7.1818	12776
Pilot_screen_BYxRM	haploid-R2	P8	O10,O9	YBR122C	BY	Haploid	OK	2.989	3.015	0.0223	3.0101	3.0155	4.893	864	2.98	2.996	0.0416	3.0223	2.9963	5.3438	8533
Pilot_screen_BYxRM	haploid-R2	P8	O10,O9	YBR122C	RM	Haploid	OK	2.972	3.006	0.0311	3.0014	3.006	5.0245	965	2.941	2.986	0.0587	2.997	2.9864	5.3418	9230
Pilot_screen_BYxRM	haploid-R1	P8	P9	YBR122C	BY	Haploid	OK	3.183	3.192	0.0156	3.2007	3.1921	5.4323	1159	3.195	3.19	0.0365	3.2398	3.1902	5.9608	11518
Pilot_screen_BYxRM	haploid-R1	P8	P9	YBR122C	RM	Haploid	OK	3.192	3.187	0.0147	3.2092	3.1868	5.3764	411	3.198	3.202	0.035	3.237	3.2016	5.7804	4023
Pilot_screen_BYxRM	haploid-R2	P3	I22	YBR123C	BY	Haploid	OK	3.007	3.014	0.0205	3.0298	3.0144	5.0986	576	3.02	3.026	0.0211	3.0432	3.0261	5.1186	5686
Pilot_screen_BYxRM	haploid-R2	P3	I22	YBR123C	RM	Haploid	OK	2.933	2.946	0.0288	2.964	2.9459	5.1011	306	2.969	2.98	0.0274	2.9987	2.9802	5.1529	3200
Pilot_screen_BYxRM	haploid-R1	P3	I22	YBR123C	BY	Haploid	OK	3.041	3.034	0.0256	3.0879	3.0337	6.1644	307	3.117	3.079	0.0573	3.1893	3.0786	6.0441	4352
Pilot_screen_BYxRM	haploid-R1	P3	I22	YBR123C	RM	Haploid	OK	2.969	2.972	0.0127	2.9844	2.9724	4.8901	1106	2.963	2.964	0.024	2.9909	2.9639	5.1714	9741
Pilot_screen_BYxRM	fillin	Haploid-fillin_P1	C17	YBR123C	BY	Haploid	NA	3.124	3.109	0.0288	3.1612	3.1092	5.7103	1220	3.127	3.084	0.0602	3.2023	3.0844	6.0682	11837
Pilot_screen_BYxRM	fillin	Haploid-fillin_P1	C17	YBR123C	RM	Haploid	NA	3.036	3.037	0.0162	3.0545	3.0373	5.0924	1094	2.992	2.989	0.0311	3.0281	2.9892	5.3274	8186
Pilot_screen_BYxRM	haploid-R2	P5	L20	YBR125C	BY	Haploid	OK	2.945	2.975	0.0297	2.9793	2.9752	5.3479	328	2.952	2.964	0.0345	2.9948	2.9642	5.6943	3612
Pilot_screen_BYxRM	haploid-R2	P5	L20	YBR125C	RM	Haploid	OK	2.88	2.9	0.0398	2.9278	2.8999	5.5496	301	2.889	2.911	0.0453	2.9388	2.9111	5.5397	2769
Pilot_screen_BYxRM	haploid-R1	P5	L20	YBR125C	BY	Haploid	Bad-count	3.153	3.156	0.0738	3.2414	3.1559	6.1717	40	3.364	3.381	0.083	3.4523	3.3809	6.5167	899
Pilot_screen_BYxRM	haploid-R1	P5	L20	YBR125C	RM	Haploid	OK	3.007	3.008	0.018	3.0289	3.0076	5.1415	632	3.018	3.012	0.0369	3.0652	3.0117	5.7916	5646
Pilot_screen_BYxRM	haploid-R2	P4	H19	YBR126C	BY	Haploid	OK	4.016	4.083	0.108	4.0901	4.0826	7.4565	820	4.017	4.072	0.111	4.1	4.0724	7.6328	8297
Pilot_screen_BYxRM	haploid-R2	P4	H19	YBR126C	RM	Haploid	OK	3.894	3.915	0.0627	3.944	3.9151	7.1323	460	3.878	3.931	0.1018	3.9575	3.9314	7.4226	4376
Pilot_screen_BYxRM	haploid-R1	P4	H19	YBR126C	BY	Haploid	OK	3.944	4.014	0.1057	4.0218	4.0145	7.3558	365	3.894	3.991	0.1562	4.0207	3.9911	7.6584	4590
Pilot_screen_BYxRM	haploid-R1	P4	H19	YBR126C	RM	Haploid	OK	3.799	3.838	0.0636	3.852	3.8379	6.9448	1220	3.783	3.839	0.0972	3.8623	3.8392	7.1559	11142
Pilot_screen_BYxRM	haploid-R2	P10	F23,F24	YBR127C	BY	Haploid	OK	3.378	3.558	0.1598	3.5044	3.5581	6.4824	1576	3.312	3.502	0.2173	3.493	3.5021	6.7065	15610
Pilot_screen_BYxRM	haploid-R2	P10	F23,F24	YBR127C	RM	Haploid	OK	3.498	3.537	0.0524	3.5369	3.5373	6.0969	1692	3.481	3.535	0.0965	3.5553	3.5346	6.4878	16046
Pilot_screen_BYxRM	haploid-R1	P10	F24	YBR127C	BY	Haploid	OK	3.715	3.766	0.0502	3.755	3.7657	6.5322	1043	3.697	3.741	0.0706	3.7584	3.7406	6.8439	10885
Pilot_screen_BYxRM	haploid-R1	P10	F24	YBR127C	RM	Haploid	OK	3.696	3.731	0.0386	3.7265	3.7311	6.3899	810	3.706	3.734	0.0592	3.7583	3.7341	6.8247	7561
Pilot_screen_BYxRM	fillin	Haploid-fillin_P1	C18	YBR127C	BY	Haploid	NA	3.792	3.848	0.071	3.8528	3.8479	7.006	1318	3.766	3.805	0.0748	3.8339	3.805	7.0881	11074
Pilot_screen_BYxRM	fillin	Haploid-fillin_P1	C18	YBR127C	RM	Haploid	NA	3.753	3.795	0.0572	3.7975	3.7955	6.6886	1288	3.713	3.747	0.0704	3.775	3.7473	6.9219	8394
Pilot_screen_BYxRM	haploid-R2	P6	H05	YBR129C	BY	Haploid	OK	3.04	3.064	0.0242	3.0656	3.0644	5.177	324	3.071	3.069	0.0352	3.1116	3.0686	5.5823	3831
Pilot_screen_BYxRM	haploid-R2	P6	H05	YBR129C	RM	Haploid	OK	2.969	2.978	0.0202	2.9922	2.9785	5.0137	315	2.981	2.997	0.0325	3.0159	2.9974	5.2762	2491
Pilot_screen_BYxRM	haploid-R1	P6	H5	YBR129C	BY	Haploid	OK	2.969	2.969	0.0192	2.9974	2.9693	5.571	1140	2.973	2.966	0.036	3.0222	2.9658	5.7292	11257
Pilot_screen_BYxRM	haploid-R1	P6	H5	YBR129C	RM	Haploid	OK	2.947	2.943	0.0181	2.9692	2.9429	5.1113	573	2.948	2.953	0.0302	2.9835	2.9533	5.2882	5832
Pilot_screen_BYxRM	haploid-R2	P5	I10	YBR130C	BY	Haploid	OK	3.171	3.176	0.0227	3.1987	3.1757	5.6684	415	3.174	3.183	0.0258	3.2032	3.1827	5.5943	4382
Pilot_screen_BYxRM	haploid-R2	P5	I10	YBR130C	RM	Haploid	OK	3.116	3.125	0.0219	3.142	3.1251	5.4628	404	3.13	3.144	0.0263	3.1609	3.1445	5.8162	3801
Pilot_screen_BYxRM	haploid-R1	P5	I10	YBR130C	BY	Haploid	OK	3.196	3.199	0.0245	3.2258	3.1992	5.7232	457	3.251	3.217	0.0581	3.3218	3.2168	6.281	6328
Pilot_screen_BYxRM	haploid-R1	P5	I10	YBR130C	RM	Haploid	OK	3.135	3.139	0.0137	3.1505	3.1392	5.1767	1015	3.137	3.139	0.0265	3.1682	3.1395	5.6846	8321
Pilot_screen_BYxRM	fillin	Haploid-fillin_P1	C19	YBR130C	BY	Haploid	NA	3.238	3.236	0.0255	3.2701	3.2358	5.8822	1157	3.255	3.218	0.0547	3.3234	3.2178	6.2617	11437
Pilot_screen_BYxRM	fillin	Haploid-fillin_P1	C19	YBR130C	RM	Haploid	NA	3.183	3.187	0.0155	3.1997	3.1872	5.2788	964	3.145	3.141	0.0315	3.1811	3.1413	5.6495	6603
Pilot_screen_BYxRM	haploid-R2	P2	F10,F9	YBR131W	BY	Haploid	OK	3.06	3.06	0.0301	3.0987	3.0601	5.6815	1607	3.115	3.086	0.0739	3.2043	3.0861	6.1538	16485
Pilot_screen_BYxRM	haploid-R2	P2	F10,F9	YBR131W	RM	Haploid	OK	2.99	3.003	0.0294	3.0198	3.0031	5.1547	1255	3.005	3.019	0.0441	3.0502	3.0193	5.4069	11647
Pilot_screen_BYxRM	haploid-R1	P2	F10	YBR131W	BY	Haploid	Bad-count	3.076	3.038	0.0445	3.1392	3.0384	5.9976	210	3.143	3.106	0.0801	3.24	3.1064	6.243	3178
Pilot_screen_BYxRM	haploid-R1	P2	F10	YBR131W	RM	Haploid	OK	2.971	2.963	0.0195	2.9982	2.9629	5.3493	525	2.982	2.977	0.0368	3.0262	2.9766	5.4893	4145
Pilot_screen_BYxRM	haploid-R2	P10	C15,C16	YBR132C	BY	Haploid	OK	2.842	2.861	0.0345	2.8774	2.861	4.944	1722	2.906	2.905	0.0584	2.9704	2.9046	5.4585	16924
Pilot_screen_BYxRM	haploid-R2	P10	C15,C16	YBR132C	RM	Haploid	OK	2.787	2.796	0.0334	2.8224	2.7957	4.8454	2127	2.801	2.804	0.0503	2.8573	2.8037	5.1875	20423
Pilot_screen_BYxRM	haploid-R1	P10	D15	YBR132C	BY	Haploid	OK	3.145	3.141	0.0259	3.177	3.1408	5.6209	1041	3.166	3.14	0.0534	3.234	3.1398	6.1252	12162
Pilot_screen_BYxRM	haploid-R1	P10	D15	YBR132C	RM	Haploid	OK	3.02	3.017	0.0208	3.045	3.0168	5.2068	1082	3.054	3.04	0.0381	3.1029	3.0398	5.7215	9021
Pilot_screen_BYxRM	fillin	Haploid-fillin_P1	C20	YBR132C	BY	Haploid	NA	3.219	3.217	0.0281	3.252	3.217	5.7903	1109	3.221	3.191	0.0572	3.2939	3.1913	6.2721	10524
Pilot_screen_BYxRM	fillin	Haploid-fillin_P1	C20	YBR132C	RM	Haploid	NA	3.112	3.129	0.026	3.1411	3.1288	5.4109	1093	3.079	3.079	0.0395	3.126	3.0786	5.6701	7634
Pilot_screen_BYxRM	haploid-R2	P2	H17,H18	YBR133C	BY	Haploid	OK	3.153	3.153	0.0273	3.1902	3.153	5.8812	1409	3.209	3.178	0.0587	3.2813	3.1784	6.2261	14199
Pilot_screen_BYxRM	haploid-R2	P2	H17,H18	YBR133C	RM	Haploid	OK	3.069	3.087	0.0215	3.0926	3.0871	5.197	978	3.07	3.084	0.0335	3.1059	3.0843	5.4181	8845
Pilot_screen_BYxRM	haploid-R1	P2	G18	YBR133C	BY	Haploid	OK	3.051	3.042	0.0232	3.0827	3.0418	5.5464	671	3.119	3.075	0.054	3.1879	3.0755	6.0245	8653
Pilot_screen_BYxRM	haploid-R1	P2	G18	YBR133C	RM	Haploid	OK	3.053	3.06	0.0169	3.0734	3.0601	5.1813	848	3.049	3.054	0.0293	3.083	3.0536	5.5607	6484
Pilot_screen_BYxRM	haploid-R2	P9	K5,K6	YBR135W	BY	Haploid	OK	3.035	3.063	0.0291	3.0633	3.0626	5.1644	1825	3.051	3.058	0.0522	3.1048	3.0582	5.5976	18242
Pilot_screen_BYxRM	haploid-R2	P9	K5,K6	YBR135W	RM	Haploid	OK	2.943	2.959	0.025	2.9679	2.959	4.9172	1358	2.961	2.981	0.04	3.0004	2.9812	5.2164	12781
Pilot_screen_BYxRM	haploid-R1	P9	K5	YBR135W	BY	Haploid	OK	3.242	3.247	0.0122	3.2555	3.2468	5.2871	936	3.248	3.245	0.0252	3.2779	3.2451	5.9664	9462
Pilot_screen_BYxRM	haploid-R1	P9	K5	YBR135W	RM	Haploid	OK	3.221	3.241	0.0215	3.2456	3.2409	5.693	381	3.247	3.263	0.0286	3.2763	3.2632	5.6661	3722
Pilot_screen_BYxRM	haploid-R2	P8	P13,P14	YBR137W	BY	Haploid	OK	2.643	2.65	0.0275	2.6756	2.6501	4.6143	1684	2.705	2.677	0.0779	2.8031	2.6771	5.4346	16700
Pilot_screen_BYxRM	haploid-R2	P8	P13,P14	YBR137W	RM	Haploid	OK	2.591	2.608	0.0265	2.6195	2.608	4.3434	754	2.585	2.597	0.0468	2.6346	2.5975	4.6986	7154
Pilot_screen_BYxRM	haploid-R1	P8	P14	YBR137W	BY	Haploid	OK	2.914	2.915	0.021	2.9433	2.915	5.2947	1062	2.978	2.936	0.0656	3.0707	2.9358	6.0302	10518
Pilot_screen_BYxRM	haploid-R1	P8	P14	YBR137W	RM	Haploid	OK	2.872	2.866	0.0222	2.9006	2.8665	5.1179	399	2.9	2.89	0.0493	2.9617	2.8897	5.5468	3965
Pilot_screen_BYxRM	haploid-R2	P4	E03	YBR138C	BY	Haploid	OK	2.758	2.782	0.0392	2.8041	2.7819	5.2989	708	2.78	2.792	0.0443	2.8312	2.7918	5.2993	7315
Pilot_screen_BYxRM	haploid-R2	P4	E03	YBR138C	RM	Haploid	OK	2.685	2.707	0.0603	2.743	2.7075	5.05	563	2.696	2.718	0.0672	2.7682	2.7179	5.4065	5394
Pilot_screen_BYxRM	haploid-R1	P4	E3	YBR138C	BY	Haploid	OK	2.874	2.874	0.0221	2.9049	2.8742	5.3021	490	2.903	2.893	0.0429	2.9583	2.8931	5.6354	5267
Pilot_screen_BYxRM	haploid-R1	P4	E3	YBR138C	RM	Haploid	OK	2.841	2.846	0.0223	2.8655	2.8463	4.8383	701	2.841	2.842	0.038	2.8855	2.842	5.2156	6555
Pilot_screen_BYxRM	haploid-R2	P4	E12	YBR139W	BY	Haploid	OK	2.862	2.882	0.0319	2.8953	2.8824	4.9723	864	2.884	2.889	0.0362	2.9256	2.8891	5.2629	9056
Pilot_screen_BYxRM	haploid-R2	P4	E12	YBR139W	RM	Haploid	OK	2.776	2.79	0.0415	2.8222	2.7903	5.0573	645	2.8	2.818	0.0502	2.8575	2.8177	5.416	5827
Pilot_screen_BYxRM	haploid-R1	P4	E12	YBR139W	BY	Haploid	OK	2.968	2.965	0.023	2.9981	2.9653	5.3508	488	3.025	3.003	0.053	3.0931	3.0026	5.8942	5803
Pilot_screen_BYxRM	haploid-R1	P4	E12	YBR139W	RM	Haploid	OK	2.91	2.913	0.0149	2.9283	2.9134	4.9152	976	2.912	2.91	0.0307	2.9488	2.9096	5.2253	8804
Pilot_screen_BYxRM	fillin	Haploid-fillin_P1	C21	YBR139W	BY	Haploid	NA	3.039	3.021	0.0304	3.0798	3.0206	5.6809	1352	3.026	2.983	0.065	3.1107	2.9828	5.9844	12334
Pilot_screen_BYxRM	fillin	Haploid-fillin_P1	C21	YBR139W	RM	Haploid	NA	2.928	2.93	0.0239	2.9572	2.9304	5.1658	1039	2.885	2.883	0.0426	2.9353	2.8827	5.3272	7318
Pilot_screen_BYxRM	haploid-R2	P9	J3,J4	YBR140C	BY	Haploid	OK	2.719	2.73	0.0167	2.7377	2.7305	4.4103	1715	2.735	2.738	0.0367	2.7758	2.7381	4.8996	16835
Pilot_screen_BYxRM	haploid-R2	P9	J3,J4	YBR140C	RM	Haploid	OK	2.639	2.655	0.0198	2.6603	2.6547	4.2989	1231	2.645	2.661	0.0351	2.6814	2.6607	4.5753	12149
Pilot_screen_BYxRM	haploid-R1	P9	J4	YBR140C	BY	Haploid	OK	3.042	3.041	0.012	3.0561	3.0406	5.0449	986	3.053	3.047	0.0259	3.0855	3.0469	5.495	9541
Pilot_screen_BYxRM	haploid-R1	P9	J4	YBR140C	RM	Haploid	Bad-count	3.052	3.04	0.0293	3.0913	3.0402	5.5859	49	3.038	3.02	0.0528	3.1025	3.0202	5.809	782
Pilot_screen_BYxRM	fillin	Haploid-fillin_P1	C22	YBR140C	BY	Haploid	NA	3.088	3.082	0.0196	3.1145	3.0818	5.5349	1933	3.12	3.086	0.0464	3.1794	3.0862	5.9379	13818
Pilot_screen_BYxRM	fillin	Haploid-fillin_P1	C22	YBR140C	RM	Haploid	NA	2.992	2.997	0.0183	3.0132	2.9967	5.0678	988	2.982	2.983	0.0321	3.0195	2.9828	5.353	5809
Pilot_screen_BYxRM	haploid-R2	P6	L15	YBR141C	BY	Haploid	OK	3.009	3.021	0.0258	3.0353	3.0215	5.1258	369	3.023	3.032	0.0321	3.0577	3.032	5.3353	3875
Pilot_screen_BYxRM	haploid-R2	P6	L15	YBR141C	RM	Haploid	OK	2.925	2.935	0.0319	2.9609	2.9345	5.3815	265	2.941	2.954	0.0345	2.9769	2.9539	5.2127	2431
Pilot_screen_BYxRM	haploid-R1	P6	L15	YBR141C	BY	Haploid	OK	2.936	2.935	0.0192	2.9609	2.9353	5.2591	951	2.945	2.94	0.0308	2.9856	2.9399	5.4852	9340
Pilot_screen_BYxRM	haploid-R1	P6	L15	YBR141C	RM	Haploid	OK	2.9	2.903	0.0163	2.9183	2.9031	4.7984	474	2.92	2.924	0.0289	2.9523	2.9245	5.1415	4885
Pilot_screen_BYxRM	haploid-R2	P2	M19,M20	YBR142W	BY	Haploid	OK	3.276	3.295	0.0217	3.2998	3.2953	5.7471	1439	3.312	3.301	0.0435	3.363	3.3008	6.1912	14556
Pilot_screen_BYxRM	haploid-R2	P2	M19,M20	YBR142W	RM	Haploid	OK	3.267	3.283	0.0159	3.284	3.2834	5.4208	1058	3.254	3.27	0.0275	3.2838	3.2703	5.6838	9752
Pilot_screen_BYxRM	haploid-R1	P2	N19	YBR142W	BY	Haploid	Bad-count	3.229	3.242	0.0347	3.2697	3.2424	5.8978	248	3.295	3.291	0.0625	3.3631	3.2912	6.2655	3645
Pilot_screen_BYxRM	haploid-R1	P2	N19	YBR142W	RM	Haploid	OK	3.246	3.258	0.014	3.2672	3.2584	6.2028	988	3.231	3.243	0.0261	3.2592	3.2434	5.751	8707
Pilot_screen_BYxRM	haploid-R2	P5	K01	YBR143C	BY	Haploid	OK	3.907	3.972	0.0823	3.9671	3.9719	7.1248	550	3.905	3.969	0.0815	3.9647	3.9685	7.1449	6379
Pilot_screen_BYxRM	haploid-R2	P5	K01	YBR143C	RM	Haploid	OK	3.91	3.962	0.0796	3.9655	3.9616	7.0817	605	3.901	3.984	0.1176	3.9823	3.984	7.2686	5046
Pilot_screen_BYxRM	haploid-R1	P5	K1	YBR143C	BY	Haploid	OK	3.871	3.951	0.0718	3.9241	3.9514	6.9327	596	3.847	3.923	0.0901	3.9178	3.9232	7.1386	6966
Pilot_screen_BYxRM	haploid-R1	P5	K1	YBR143C	RM	Haploid	OK	3.87	3.938	0.0749	3.9222	3.938	6.8854	649	3.85	3.927	0.0957	3.9202	3.9274	7.0835	5304
Pilot_screen_BYxRM	haploid-R2	P6	E16	YBR145W	BY	Haploid	OK	2.843	2.851	0.0622	2.9075	2.8511	5.435	599	2.92	2.898	0.0736	3.012	2.8977	5.8822	6923
Pilot_screen_BYxRM	haploid-R2	P6	E16	YBR145W	RM	Haploid	OK	2.811	2.818	0.062	2.8773	2.8177	5.2986	771	2.825	2.835	0.0728	2.9046	2.8351	5.496	6569
Pilot_screen_BYxRM	haploid-R1	P6	E16	YBR145W	BY	Haploid	OK	2.885	2.88	0.031	2.9247	2.88	5.3312	1070	2.902	2.886	0.0539	2.9771	2.8858	5.8146	10947
Pilot_screen_BYxRM	haploid-R1	P6	E16	YBR145W	RM	Haploid	OK	2.879	2.879	0.0312	2.9147	2.8789	5.0899	652	2.902	2.909	0.0494	2.9586	2.9091	5.4384	6217
Pilot_screen_BYxRM	haploid-R2	P6	G04	YBR149W	BY	Haploid	OK	3.388	3.395	0.0635	3.4583	3.3952	6.5085	511	3.447	3.434	0.0897	3.5547	3.4343	6.9335	5800
Pilot_screen_BYxRM	haploid-R2	P6	G04	YBR149W	RM	Haploid	OK	3.26	3.285	0.0721	3.3359	3.2854	6.2135	749	3.284	3.291	0.0716	3.3657	3.2914	6.4498	6584
Pilot_screen_BYxRM	haploid-R1	P6	G4	YBR149W	BY	Haploid	OK	3.209	3.212	0.0427	3.2569	3.2125	5.9319	910	3.222	3.209	0.0677	3.3131	3.2093	6.5398	8734
Pilot_screen_BYxRM	haploid-R1	P6	G4	YBR149W	RM	Haploid	OK	3.156	3.157	0.0422	3.2042	3.1569	5.7969	889	3.175	3.173	0.0577	3.2411	3.1728	6.0611	9160
Pilot_screen_BYxRM	fillin	Haploid-fillin_P1	C23	YBR149W	BY	Haploid	NA	3.429	3.407	0.0711	3.5207	3.4068	6.8525	1193	3.453	3.373	0.1366	3.6362	3.3734	7.3804	10733
Pilot_screen_BYxRM	fillin	Haploid-fillin_P1	C23	YBR149W	RM	Haploid	NA	3.269	3.273	0.0438	3.3178	3.2732	6.0069	1008	3.242	3.243	0.0576	3.3119	3.2425	6.3729	6810
Pilot_screen_BYxRM	haploid-R2	P1	M15,M16	YBR150C	BY	Haploid	OK	2.948	2.962	0.031	2.9801	2.9622	5.2465	1426	2.964	2.979	0.0494	3.0157	2.9789	5.5139	14162
Pilot_screen_BYxRM	haploid-R2	P1	M15,M16	YBR150C	RM	Haploid	OK	2.935	2.956	0.0347	2.9708	2.9562	5.1511	1153	2.945	2.963	0.0522	2.9984	2.9629	5.4273	10941
Pilot_screen_BYxRM	haploid-R1	P1	N15	YBR150C	BY	Haploid	OK	2.91	2.909	0.0189	2.9345	2.9091	5.1193	402	2.973	2.931	0.0591	3.051	2.9315	5.8752	4450
Pilot_screen_BYxRM	haploid-R1	P1	N15	YBR150C	RM	Haploid	OK	2.831	2.83	0.0254	2.8652	2.8305	5.239	461	2.837	2.841	0.0404	2.8855	2.8407	5.3446	4075
Pilot_screen_BYxRM	haploid-R2	P6	N12	YBR151W	BY	Haploid	OK	3.182	3.199	0.0221	3.2057	3.199	5.4252	409	3.197	3.202	0.0289	3.2288	3.2019	5.6302	4570
Pilot_screen_BYxRM	haploid-R2	P6	N12	YBR151W	RM	Haploid	OK	3.149	3.175	0.0225	3.1741	3.1753	5.3998	358	3.165	3.178	0.032	3.1986	3.1778	5.5621	3025
Pilot_screen_BYxRM	haploid-R1	P6	N12	YBR151W	BY	Haploid	OK	3.095	3.101	0.0127	3.1123	3.1006	5.4128	869	3.102	3.1	0.0244	3.1313	3.1002	5.5381	8810
Pilot_screen_BYxRM	haploid-R1	P6	N12	YBR151W	RM	Haploid	OK	3.079	3.083	0.0137	3.0944	3.0835	5.0241	504	3.081	3.085	0.0218	3.1058	3.0853	5.3064	4913
Pilot_screen_BYxRM	haploid-R2	P7	N23,N24	YBR152W	BY	Haploid	OK	2.828	2.842	0.017	2.8467	2.8421	4.5781	740	2.86	2.868	0.0277	2.8908	2.8678	4.9782	7486
Pilot_screen_BYxRM	haploid-R2	P7	N23,N24	YBR152W	RM	Haploid	OK	2.73	2.747	0.0235	2.7547	2.7466	4.5123	947	2.725	2.742	0.0377	2.7637	2.7419	4.7656	9134
Pilot_screen_BYxRM	haploid-R1	P7	M24	YBR152W	BY	Haploid	OK	2.983	2.98	0.0145	3.0049	2.9798	5.5177	448	2.983	2.979	0.0282	3.0202	2.9793	5.5494	4608
Pilot_screen_BYxRM	haploid-R1	P7	M24	YBR152W	RM	Haploid	OK	2.942	2.95	0.0148	2.9608	2.9501	5.0438	528	2.95	2.96	0.0242	2.9774	2.96	5.0917	5075
Pilot_screen_BYxRM	haploid-R2	P5	F12	YBR155W	BY	Haploid	OK	3.211	3.255	0.035	3.2449	3.2554	5.5832	391	3.221	3.248	0.0332	3.2545	3.2481	5.6804	4267
Pilot_screen_BYxRM	haploid-R2	P5	F12	YBR155W	RM	Haploid	OK	3.193	3.22	0.0317	3.2249	3.2202	5.5336	391	3.204	3.234	0.0408	3.2476	3.2343	6.2156	3443
Pilot_screen_BYxRM	haploid-R1	P5	F12	YBR155W	BY	Haploid	OK	3.226	3.235	0.0242	3.2538	3.2345	5.6975	572	3.251	3.24	0.0515	3.3105	3.2399	6.1364	6406
Pilot_screen_BYxRM	haploid-R1	P5	F12	YBR155W	RM	Haploid	OK	3.238	3.247	0.0157	3.2551	3.2468	5.4113	466	3.217	3.229	0.0382	3.2586	3.2286	5.8026	3907
Pilot_screen_BYxRM	haploid-R2	P2	J5,J6	YBR156C	BY	Haploid	Bad-var	3.008	3.015	0.0366	3.0519	3.0149	5.5969	1340	3.069	3.048	0.0953	3.1773	3.0477	6.1667	13999
Pilot_screen_BYxRM	haploid-R2	P2	J5,J6	YBR156C	RM	Haploid	Bad-var	2.888	2.909	0.0504	2.9621	2.9091	6.7219	1364	2.883	2.916	0.0726	2.9551	2.916	5.9025	12723
Pilot_screen_BYxRM	haploid-R1	P2	J6	YBR156C	BY	Haploid	Bad-count-var	3.058	3.024	0.043	3.1216	3.0243	6.0496	169	3.169	3.154	0.0748	3.2573	3.1545	6.1953	2069
Pilot_screen_BYxRM	haploid-R1	P2	J6	YBR156C	RM	Haploid	Bad-var	2.91	2.919	0.0207	2.9352	2.9192	5.0817	325	2.886	2.888	0.0434	2.9359	2.888	5.3249	2813
Pilot_screen_BYxRM	fillin	Haploid-fillin_P1	C24	YBR156C	BY	Haploid	NA	3.028	3.013	0.0429	3.0884	3.0129	5.9641	846	2.982	2.943	0.0843	3.0891	2.9428	6.099	9527
Pilot_screen_BYxRM	fillin	Haploid-fillin_P1	C24	YBR156C	RM	Haploid	NA	2.93	2.931	0.0284	2.9635	2.9312	5.2092	738	2.86	2.863	0.0518	2.9187	2.8635	5.363	6569
Pilot_screen_BYxRM	haploid-R2	P4	K21	YBR158W	BY	Haploid	OK	2.864	2.883	0.0282	2.8971	2.8827	5.1038	539	2.882	2.894	0.0301	2.9184	2.8945	5.4265	5734
Pilot_screen_BYxRM	haploid-R2	P4	K21	YBR158W	RM	Haploid	OK	2.783	2.796	0.0356	2.8207	2.7961	4.9436	475	2.811	2.828	0.0356	2.8508	2.8278	5.0934	4248
Pilot_screen_BYxRM	haploid-R1	P4	K21	YBR158W	BY	Haploid	Bad-count	2.925	2.913	0.0369	2.9818	2.9134	5.7542	213	2.993	2.946	0.0731	3.1001	2.9459	6.2982	3367
Pilot_screen_BYxRM	haploid-R1	P4	K21	YBR158W	RM	Haploid	OK	2.855	2.855	0.0258	2.8928	2.855	5.3897	1126	2.866	2.863	0.0354	2.9167	2.8635	5.6001	10022
Pilot_screen_BYxRM	haploid-R2	P11	C10,C9	YBR159W	BY	Haploid	Bad-count-mean	2.851	2.734	0.1809	3.0276	2.7343	5.8864	52	3.052	3.12	0.1812	3.2299	3.1196	6.3086	942
Pilot_screen_BYxRM	haploid-R2	P11	C10,C9	YBR159W	RM	Haploid	Bad-count-mean	3.179	3.221	0.0521	3.2219	3.2213	5.5504	205	3.156	3.213	0.0885	3.2306	3.2131	5.8771	1765
Pilot_screen_BYxRM	haploid-R1	P11	C9	YBR159W	BY	Haploid	Bad-mean	3.468	3.476	0.0226	3.4917	3.4759	6.0228	668	3.462	3.459	0.0455	3.5133	3.459	6.4878	7390
Pilot_screen_BYxRM	haploid-R1	P11	C9	YBR159W	RM	Haploid	Bad-mean	3.407	3.407	0.0143	3.4219	3.4068	5.6744	603	3.412	3.425	0.0334	3.4462	3.4251	6.0607	5282
Pilot_screen_BYxRM	haploid-R2	P7	K10,K9	YBR160W	BY	Haploid	OK	3.14	3.151	0.0181	3.1578	3.1507	5.1511	1705	3.135	3.142	0.0314	3.1684	3.1422	5.5099	17053
Pilot_screen_BYxRM	haploid-R2	P7	K10,K9	YBR160W	RM	Haploid	OK	3.104	3.119	0.0251	3.1289	3.1185	5.2641	1138	3.109	3.13	0.0395	3.1481	3.1302	5.5194	11171
Pilot_screen_BYxRM	haploid-R1	P7	K9	YBR160W	BY	Haploid	OK	3.277	3.293	0.0199	3.2976	3.2926	5.5202	575	3.268	3.277	0.0283	3.3017	3.2771	6.2778	5498
Pilot_screen_BYxRM	haploid-R1	P7	K9	YBR160W	RM	Haploid	OK	3.284	3.293	0.0167	3.2997	3.2928	5.3504	384	3.286	3.293	0.0276	3.318	3.293	6.1711	4125
Pilot_screen_BYxRM	haploid-R2	P6	A23	YBR161W	BY	Haploid	OK	2.897	2.907	0.035	2.9408	2.9072	5.507	693	2.93	2.932	0.045	2.9858	2.9325	5.6998	7790
Pilot_screen_BYxRM	haploid-R2	P6	A23	YBR161W	RM	Haploid	OK	2.83	2.846	0.0357	2.8673	2.8457	5.0358	734	2.858	2.873	0.0487	2.9124	2.8726	5.4866	6241
Pilot_screen_BYxRM	haploid-R1	P6	A23	YBR161W	BY	Haploid	OK	2.888	2.892	0.0225	2.9146	2.8925	5.0648	1101	2.91	2.908	0.0431	2.967	2.9085	5.6894	10859
Pilot_screen_BYxRM	haploid-R1	P6	A23	YBR161W	RM	Haploid	OK	2.859	2.873	0.0275	2.8883	2.873	4.8804	601	2.899	2.912	0.0401	2.9431	2.9118	5.3126	6074
Pilot_screen_BYxRM	haploid-R2	P5	G23	YBR162C	BY	Haploid	Bad-mean-var	3.034	3.046	0.0293	3.0658	3.0459	5.2853	278	3.05	3.065	0.0389	3.0942	3.0648	5.6757	2895
Pilot_screen_BYxRM	haploid-R2	P5	G23	YBR162C	RM	Haploid	Bad-count-mean-var	3.075	3.091	0.0543	3.1639	3.0911	6.7113	182	3.097	3.12	0.0522	3.155	3.1197	6.0216	1717
Pilot_screen_BYxRM	haploid-R1	P5	G23	YBR162C	BY	Haploid	Bad-count-mean-var	3.382	3.372	0.0781	3.4706	3.3746	6.5593	18	3.444	3.467	0.0771	3.5273	3.4673	6.6356	606
Pilot_screen_BYxRM	haploid-R1	P5	G23	YBR162C	RM	Haploid	Bad-mean-var	3.148	3.166	0.0276	3.1787	3.1663	5.4979	1117	3.142	3.16	0.0451	3.1908	3.1597	5.7375	10789
Pilot_screen_BYxRM	fillin	Haploid-fillin_P1	D01	YBR162C	BY	Haploid	NA	3.146	3.141	0.0254	3.1753	3.1413	5.5308	2097	3.158	3.149	0.0511	3.217	3.1489	5.928	13730
Pilot_screen_BYxRM	fillin	Haploid-fillin_P1	D01	YBR162C	RM	Haploid	NA	3.167	3.162	0.0285	3.1999	3.1618	5.6198	1181	3.17	3.165	0.054	3.2301	3.1652	5.9371	6706
Pilot_screen_BYxRM	haploid-R2	P9	F10,F9	YBR162W-A	BY	Haploid	OK	2.889	2.892	0.0215	2.914	2.8916	4.9743	1474	2.913	2.904	0.0555	2.9794	2.9037	5.5871	14554
Pilot_screen_BYxRM	haploid-R2	P9	F10,F9	YBR162W-A	RM	Haploid	OK	2.834	2.844	0.0197	2.8549	2.844	4.6779	2109	2.832	2.841	0.0372	2.8715	2.8414	5.0099	20569
Pilot_screen_BYxRM	haploid-R1	P9	F10	YBR162W-A	BY	Haploid	OK	3.127	3.12	0.0201	3.1575	3.1203	6.003	1033	3.131	3.115	0.0428	3.1875	3.1146	6.1535	11494
Pilot_screen_BYxRM	haploid-R1	P9	F10	YBR162W-A	RM	Haploid	OK	3.091	3.097	0.0161	3.1126	3.0967	5.5384	846	3.1	3.104	0.028	3.1337	3.1037	5.7094	7242
Pilot_screen_BYxRM	haploid-R2	P3	N02	YBR163W	BY	Haploid	Bad-var	2.876	2.89	0.0278	2.9064	2.89	4.9718	584	2.892	2.907	0.0358	2.9311	2.9067	5.352	6180
Pilot_screen_BYxRM	haploid-R2	P3	N02	YBR163W	RM	Haploid	Bad-var	2.791	2.814	0.0456	2.834	2.8143	4.9277	658	2.823	2.849	0.0428	2.8645	2.8486	4.9774	6351
Pilot_screen_BYxRM	haploid-R1	P3	N2	YBR163W	BY	Haploid	Bad-var	3.014	3.015	0.0165	3.0354	3.0155	5.2847	935	3.036	3.017	0.0451	3.0921	3.0172	5.7601	9205
Pilot_screen_BYxRM	haploid-R1	P3	N2	YBR163W	RM	Haploid	Bad-count-var	3.065	3.04	0.0582	3.137	3.0396	5.9131	48	3.089	3.097	0.0506	3.1461	3.0971	5.798	604
Pilot_screen_BYxRM	haploid-R2	P11	C10,C9	YBR164C	BY	Haploid	OK	3.058	3.096	0.038	3.0934	3.096	5.276	2409	3.071	3.08	0.0586	3.132	3.0795	5.7168	24203
Pilot_screen_BYxRM	haploid-R2	P11	C10,C9	YBR164C	RM	Haploid	OK	3.08	3.097	0.026	3.1067	3.0969	5.2287	1398	3.098	3.114	0.0383	3.137	3.1136	5.4947	13684
Pilot_screen_BYxRM	haploid-R1	P11	D9	YBR164C	BY	Haploid	OK	3.312	3.313	0.0184	3.3333	3.313	5.7572	680	3.313	3.305	0.0387	3.3599	3.3049	6.1804	7448
Pilot_screen_BYxRM	haploid-R1	P11	D9	YBR164C	RM	Haploid	OK	3.241	3.248	0.014	3.2563	3.2479	5.3298	570	3.265	3.271	0.0293	3.2974	3.2713	5.7956	4929
Pilot_screen_BYxRM	fillin	Haploid-fillin_P1	D02	YBR164C	BY	Haploid	NA	3.44	3.441	0.041	3.4866	3.4414	6.3698	374	3.463	3.43	0.0608	3.5346	3.4305	6.6436	4034
Pilot_screen_BYxRM	fillin	Haploid-fillin_P1	D02	YBR164C	RM	Haploid	NA	3.336	3.34	0.0151	3.352	3.3404	5.5636	972	3.298	3.304	0.0262	3.3273	3.3042	5.8176	6045
Pilot_screen_BYxRM	haploid-R2	P5	K17	YBR166C	BY	Haploid	OK	3.146	3.186	0.0328	3.1827	3.1856	5.7287	266	3.153	3.174	0.0318	3.1895	3.1736	5.9085	2976
Pilot_screen_BYxRM	haploid-R2	P5	K17	YBR166C	RM	Haploid	Bad-count	3.156	3.161	0.0175	3.1748	3.161	5.2605	174	3.148	3.166	0.034	3.1895	3.1656	6.2475	1384
Pilot_screen_BYxRM	haploid-R1	P5	K17	YBR166C	BY	Haploid	OK	3.193	3.187	0.0313	3.2342	3.1875	5.9336	316	3.269	3.211	0.0748	3.3626	3.2114	6.513	4233
Pilot_screen_BYxRM	haploid-R1	P5	K17	YBR166C	RM	Haploid	OK	3.129	3.141	0.0143	3.1447	3.1411	5.1106	835	3.124	3.132	0.0252	3.1519	3.1318	5.4433	7249
Pilot_screen_BYxRM	haploid-R2	P9	P15,P16	YBR167C	BY	Haploid	OK	2.719	2.729	0.0183	2.7393	2.7292	4.4255	1560	2.751	2.749	0.0458	2.8015	2.7487	5.0183	15724
Pilot_screen_BYxRM	haploid-R2	P9	P15,P16	YBR167C	RM	Haploid	OK	2.635	2.657	0.0328	2.6686	2.6572	4.4703	1392	2.658	2.678	0.0462	2.7048	2.6782	4.7339	13638
Pilot_screen_BYxRM	haploid-R1	P9	O16	YBR167C	BY	Haploid	OK	2.952	2.96	0.0147	2.9703	2.96	5.0056	1279	2.963	2.961	0.0297	2.9995	2.961	5.3911	12665
Pilot_screen_BYxRM	haploid-R1	P9	O16	YBR167C	RM	Haploid	OK	2.928	2.935	0.0219	2.9531	2.9348	5.0286	418	2.944	2.947	0.0338	2.9833	2.9474	5.3058	4316
Pilot_screen_BYxRM	haploid-R2	P5	H19	YBR168W	BY	Haploid	OK	2.842	2.868	0.0335	2.8759	2.8684	4.9013	345	2.857	2.871	0.0356	2.8955	2.8708	5.0966	3547
Pilot_screen_BYxRM	haploid-R2	P5	H19	YBR168W	RM	Haploid	OK	2.795	2.808	0.0356	2.8347	2.8081	4.9804	268	2.805	2.818	0.0388	2.8484	2.8184	5.0931	2570
Pilot_screen_BYxRM	haploid-R1	P5	H19	YBR168W	BY	Haploid	OK	2.942	2.929	0.0286	2.9833	2.9289	5.5244	706	3.002	2.95	0.0703	3.0966	2.9503	6.0759	8263
Pilot_screen_BYxRM	haploid-R1	P5	H19	YBR168W	RM	Haploid	OK	2.874	2.883	0.0188	2.8963	2.8835	4.8735	866	2.89	2.89	0.0378	2.9348	2.8903	5.2819	7396
Pilot_screen_BYxRM	haploid-R2	P2	D3,D4	YBR169C	BY	Haploid	OK	3.45	3.462	0.0399	3.4944	3.462	6.4016	1774	3.508	3.466	0.0957	3.6349	3.466	7.2516	17867
Pilot_screen_BYxRM	haploid-R2	P2	D3,D4	YBR169C	RM	Haploid	OK	3.288	3.293	0.0265	3.3179	3.293	5.8618	1685	3.292	3.299	0.0398	3.3355	3.2986	6.0449	16591
Pilot_screen_BYxRM	haploid-R1	P2	D4	YBR169C	BY	Haploid	OK	3.507	3.507	0.0714	3.5901	3.5073	6.8789	477	3.565	3.531	0.1061	3.6883	3.5313	7.2217	5941
Pilot_screen_BYxRM	haploid-R1	P2	D4	YBR169C	RM	Haploid	OK	3.314	3.314	0.022	3.3384	3.3139	5.7601	914	3.302	3.3	0.0366	3.3445	3.3001	6.0763	7919
Pilot_screen_BYxRM	haploid-R2	P3	N24	YBR170C	BY	Haploid	OK	3.228	3.237	0.0184	3.2484	3.2366	5.5052	601	3.237	3.246	0.0223	3.262	3.2464	5.7014	5706
Pilot_screen_BYxRM	haploid-R2	P3	N24	YBR170C	RM	Haploid	Bad-count	3.155	3.15	0.0316	3.1985	3.1496	6.0175	184	3.169	3.184	0.0395	3.2177	3.184	6.1361	2167
Pilot_screen_BYxRM	haploid-R1	P3	N24	YBR170C	BY	Haploid	OK	3.212	3.219	0.0147	3.229	3.2195	5.3681	987	3.238	3.218	0.0391	3.2853	3.2181	6.0257	9717
Pilot_screen_BYxRM	haploid-R1	P3	N24	YBR170C	RM	Haploid	Bad-count	3.05	3.101	0.0189	3.0696	3.1009	5.0009	11	3.186	3.18	0.0476	3.2386	3.1802	5.8604	196
Pilot_screen_BYxRM	haploid-R2	P2	D3,D4	YBR172C	BY	Haploid	OK	3.361	3.386	0.0276	3.3909	3.3857	5.9223	1746	3.368	3.376	0.0428	3.4144	3.3757	6.1821	17474
Pilot_screen_BYxRM	haploid-R2	P2	D3,D4	YBR172C	RM	Haploid	OK	3.32	3.357	0.0273	3.3473	3.3565	5.6994	551	3.299	3.334	0.0404	3.3396	3.3341	5.8808	5094
Pilot_screen_BYxRM	haploid-R1	P2	C4	YBR172C	BY	Haploid	Bad-count	3.263	3.28	0.0337	3.3025	3.2798	5.9555	214	3.264	3.27	0.0517	3.322	3.2699	6.2154	2780
Pilot_screen_BYxRM	haploid-R1	P2	C4	YBR172C	RM	Haploid	OK	3.25	3.265	0.0148	3.2656	3.2649	5.2949	599	3.247	3.259	0.0308	3.2796	3.2591	5.7169	5305
Pilot_screen_BYxRM	haploid-R2	P9	C3,C4	YBR173C	BY	Haploid	OK	2.455	2.474	0.0339	2.4914	2.4745	4.2662	1477	2.495	2.505	0.065	2.5661	2.5056	4.7215	14518
Pilot_screen_BYxRM	haploid-R2	P9	C3,C4	YBR173C	RM	Haploid	OK	2.443	2.473	0.0539	2.4936	2.473	4.2931	2006	2.477	2.51	0.0681	2.5417	2.5097	4.5027	19908
Pilot_screen_BYxRM	haploid-R1	P9	C3	YBR173C	BY	Haploid	OK	2.87	2.878	0.0213	2.8964	2.8783	5.2017	1535	2.881	2.877	0.0389	2.929	2.8771	5.3856	15470
Pilot_screen_BYxRM	haploid-R1	P9	C3	YBR173C	RM	Haploid	OK	2.822	2.829	0.021	2.8458	2.8292	4.7687	1133	2.85	2.856	0.0373	2.8923	2.8562	5.1202	11073
Pilot_screen_BYxRM	haploid-R2	P6	D12	YBR175W	BY	Haploid	OK	2.896	2.911	0.0359	2.9322	2.9113	5.1079	528	2.944	2.942	0.0477	3.0002	2.9418	5.6507	5968
Pilot_screen_BYxRM	haploid-R2	P6	D12	YBR175W	RM	Haploid	OK	2.85	2.87	0.0383	2.8899	2.8699	5.0265	470	2.873	2.893	0.0422	2.9178	2.8931	5.1569	3971
Pilot_screen_BYxRM	haploid-R1	P6	D12	YBR175W	BY	Haploid	OK	2.924	2.928	0.0218	2.9536	2.9284	5.3347	774	2.926	2.915	0.0428	2.9836	2.915	5.668	7906
Pilot_screen_BYxRM	haploid-R1	P6	D12	YBR175W	RM	Haploid	OK	2.875	2.887	0.0231	2.9016	2.8866	4.9953	770	2.897	2.909	0.0333	2.9351	2.9091	5.2251	7437
Pilot_screen_BYxRM	fillin	Haploid-fillin_P1	D03	YBR175W	BY	Haploid	NA	3.04	3.031	0.025	3.0727	3.0307	5.5077	1312	3.035	3.001	0.0519	3.1045	3.0014	5.9138	11167
Pilot_screen_BYxRM	fillin	Haploid-fillin_P1	D03	YBR175W	RM	Haploid	NA	2.947	2.95	0.0184	2.9683	2.9504	4.935	1161	2.94	2.939	0.0315	2.9759	2.9392	5.2193	6601
Pilot_screen_BYxRM	haploid-R2	P6	F08	YBR176W	BY	Haploid	Bad-var	2.866	2.871	0.0275	2.8991	2.8711	5.1103	376	2.931	2.916	0.049	2.991	2.9162	5.6535	4220
Pilot_screen_BYxRM	haploid-R2	P6	F08	YBR176W	RM	Haploid	Bad-count-var	2.81	2.814	0.05	2.932	2.8136	6.632	247	2.821	2.826	0.0521	2.8895	2.8258	5.8805	2006
Pilot_screen_BYxRM	haploid-R1	P6	F8	YBR176W	BY	Haploid	Bad-var	2.847	2.853	0.0241	2.8783	2.8525	5.1928	834	2.886	2.87	0.0482	2.953	2.8701	5.722	8349
Pilot_screen_BYxRM	haploid-R1	P6	F8	YBR176W	RM	Haploid	Bad-var	2.816	2.823	0.0217	2.842	2.8233	4.8416	654	2.835	2.84	0.0368	2.8774	2.84	5.1351	6442
Pilot_screen_BYxRM	fillin	Haploid-fillin_P1	D04	YBR176W	BY	Haploid	NA	3.082	3.05	0.0394	3.1325	3.0499	5.7537	639	3.111	3.06	0.0835	3.2117	3.0605	6.1772	6256
Pilot_screen_BYxRM	fillin	Haploid-fillin_P1	D04	YBR176W	RM	Haploid	NA	2.923	2.927	0.0176	2.944	2.9267	4.9206	1607	2.886	2.887	0.0348	2.9273	2.8873	5.2232	10833
Pilot_screen_BYxRM	haploid-R2	P5	O15	YBR177C	BY	Haploid	OK	3.483	3.541	0.052	3.5261	3.5411	6.1313	419	3.474	3.529	0.0504	3.5177	3.5289	6.1694	4542
Pilot_screen_BYxRM	haploid-R2	P5	O15	YBR177C	RM	Haploid	OK	3.461	3.48	0.03	3.491	3.4797	6.0785	378	3.456	3.483	0.0432	3.5004	3.483	6.4529	3446
Pilot_screen_BYxRM	haploid-R1	P5	O15	YBR177C	BY	Haploid	OK	3.461	3.486	0.0258	3.4896	3.4865	6.3621	499	3.439	3.467	0.0384	3.4775	3.4675	6.1875	5668
Pilot_screen_BYxRM	haploid-R1	P5	O15	YBR177C	RM	Haploid	OK	3.42	3.437	0.0207	3.4395	3.4373	5.7376	745	3.407	3.43	0.0351	3.4403	3.43	6.0013	6753
Pilot_screen_BYxRM	haploid-R2	P10	F21,F22	YBR179C	BY	Haploid	OK	2.764	2.77	0.0183	2.7843	2.7702	4.5305	444	2.772	2.774	0.0475	2.8251	2.7741	5.099	4534
Pilot_screen_BYxRM	haploid-R2	P10	F21,F22	YBR179C	RM	Haploid	Bad-count	2.7	2.735	0.0262	2.7265	2.7347	4.4704	102	2.671	2.709	0.0524	2.7234	2.7088	4.7984	938
Pilot_screen_BYxRM	haploid-R1	P10	E22	YBR179C	BY	Haploid	OK	3.033	3.045	0.0162	3.0535	3.0446	5.2658	792	3.058	3.039	0.0406	3.1109	3.0386	5.8022	8557
Pilot_screen_BYxRM	haploid-R1	P10	E22	YBR179C	RM	Haploid	OK	3.027	3.028	0.017	3.0535	3.0284	5.7555	631	3.045	3.042	0.0279	3.0792	3.0418	5.5423	5615
Pilot_screen_BYxRM	fillin	Haploid-fillin_P1	D05	YBR179C	BY	Haploid	NA	3.109	3.106	0.016	3.1288	3.1065	5.3902	1312	3.124	3.102	0.0348	3.1684	3.1021	5.7925	9093
Pilot_screen_BYxRM	fillin	Haploid-fillin_P1	D05	YBR179C	RM	Haploid	NA	3.055	3.056	0.0152	3.073	3.056	5.129	724	3.057	3.058	0.0246	3.0858	3.0582	5.3604	3857
Pilot_screen_BYxRM	haploid-R2	P6	K18	YBR181C	BY	Haploid	Bad-count	3.47	3.535	0.0707	3.5322	3.5346	6.376	200	3.485	3.531	0.0618	3.5449	3.5308	6.4642	2807
Pilot_screen_BYxRM	haploid-R2	P6	K18	YBR181C	RM	Haploid	OK	3.381	3.45	0.0735	3.4458	3.4503	6.2103	372	3.384	3.452	0.08	3.4558	3.452	6.2956	2883
Pilot_screen_BYxRM	haploid-R1	P6	K18	YBR181C	BY	Haploid	OK	3.425	3.466	0.0338	3.4571	3.4663	6.0116	773	3.413	3.435	0.0482	3.4653	3.4351	6.4016	7844
Pilot_screen_BYxRM	haploid-R1	P6	K18	YBR181C	RM	Haploid	OK	3.368	3.409	0.0326	3.3998	3.4092	5.8629	383	3.352	3.393	0.0466	3.3992	3.3935	6.0774	3643
Pilot_screen_BYxRM	fillin	Haploid-fillin_P1	D06	YBR181C	BY	Haploid	NA	3.478	3.536	0.0739	3.5567	3.5358	6.6679	258	3.568	3.592	0.1111	3.6812	3.5923	7.0531	2693
Pilot_screen_BYxRM	fillin	Haploid-fillin_P1	D06	YBR181C	RM	Haploid	NA	3.485	3.52	0.0365	3.5189	3.5202	6.0885	750	3.443	3.471	0.0532	3.4949	3.4711	6.3201	4918
Pilot_screen_BYxRM	haploid-R2	P11	F10,F9	YBR185C	BY	Haploid	OK	2.895	2.916	0.0228	2.918	2.9165	4.8434	1113	2.917	2.915	0.0496	2.9718	2.9154	5.3948	11361
Pilot_screen_BYxRM	haploid-R2	P11	F10,F9	YBR185C	RM	Haploid	OK	2.829	2.841	0.0241	2.8557	2.8412	4.781	1322	2.847	2.854	0.043	2.8941	2.8542	5.1611	12684
Pilot_screen_BYxRM	haploid-R1	P11	E10	YBR185C	BY	Haploid	OK	3.173	3.171	0.0174	3.1952	3.1715	5.5791	683	3.196	3.171	0.0416	3.2498	3.1709	6.0708	7403
Pilot_screen_BYxRM	haploid-R1	P11	E10	YBR185C	RM	Haploid	OK	3.099	3.104	0.0204	3.123	3.1045	5.3408	601	3.118	3.117	0.0339	3.157	3.1167	5.6274	5429
Pilot_screen_BYxRM	fillin	Haploid-fillin_P1	D07	YBR185C	BY	Haploid	NA	3.209	3.213	0.0177	3.2295	3.2129	5.4876	1337	3.208	3.188	0.0406	3.2588	3.1884	6.0065	10415
Pilot_screen_BYxRM	fillin	Haploid-fillin_P1	D07	YBR185C	RM	Haploid	NA	3.143	3.148	0.0184	3.1634	3.1477	5.3092	1148	3.117	3.116	0.0306	3.1527	3.116	5.5789	7036
Pilot_screen_BYxRM	haploid-R2	P11	N10,N9	YBR187W	BY	Haploid	OK	2.806	2.818	0.0283	2.8375	2.8184	4.9189	758	2.823	2.833	0.0445	2.8706	2.8331	5.0913	7643
Pilot_screen_BYxRM	haploid-R2	P11	N10,N9	YBR187W	RM	Haploid	OK	2.781	2.793	0.0349	2.817	2.7932	4.8363	1215	2.778	2.795	0.0514	2.8303	2.7953	5.0199	11482
Pilot_screen_BYxRM	haploid-R1	P11	M10	YBR187W	BY	Haploid	OK	3.1	3.085	0.0257	3.1344	3.0853	5.6955	628	3.114	3.09	0.0475	3.1746	3.0902	5.9536	6798
Pilot_screen_BYxRM	haploid-R1	P11	M10	YBR187W	RM	Haploid	OK	3.12	3.117	0.0303	3.1611	3.1173	5.883	415	3.122	3.121	0.0455	3.1775	3.1207	5.9635	3583
Pilot_screen_BYxRM	haploid-R2	P9	N15,N16	YBR188C	BY	Haploid	Bad-var	2.78	2.789	0.0179	2.8	2.7892	4.5775	1505	2.799	2.797	0.0427	2.8471	2.7972	5.0871	14929
Pilot_screen_BYxRM	haploid-R2	P9	N15,N16	YBR188C	RM	Haploid	Bad-var	2.708	2.724	0.0255	2.735	2.7236	4.5201	1400	2.718	2.737	0.0403	2.7588	2.7372	4.768	13748
Pilot_screen_BYxRM	haploid-R1	P9	M16	YBR188C	BY	Haploid	Bad-count-var	3.265	3.175	0.0962	3.3902	3.175	6.6311	26	3.313	3.245	0.1046	3.4451	3.2448	6.816	344
Pilot_screen_BYxRM	haploid-R1	P9	M16	YBR188C	RM	Haploid	Bad-var	3.006	3.007	0.0161	3.0266	3.0067	5.2702	918	3.006	3.006	0.0242	3.0359	3.0061	5.485	8994
Pilot_screen_BYxRM	fillin	Haploid-fillin_P1	D08	YBR188C	BY	Haploid	NA	3.144	3.136	0.0237	3.1736	3.1361	5.6214	675	3.186	3.162	0.0489	3.2451	3.1624	6.0237	5790
Pilot_screen_BYxRM	fillin	Haploid-fillin_P1	D08	YBR188C	RM	Haploid	NA	3.048	3.053	0.0145	3.0643	3.0527	5.0512	1391	3.037	3.036	0.0283	3.0694	3.0361	5.3508	8121
Pilot_screen_BYxRM	haploid-R2	P6	J09	YBR189W	BY	Haploid	Bad-count	4.155	4.251	0.2166	4.3213	4.2509	8.4272	168	4.193	4.316	0.2481	4.367	4.3159	8.4401	2538
Pilot_screen_BYxRM	haploid-R2	P6	J09	YBR189W	RM	Haploid	OK	4.217	4.329	0.208	4.356	4.3293	8.3162	315	4.127	4.316	0.3093	4.3363	4.3158	8.4257	2283
Pilot_screen_BYxRM	haploid-R1	P6	J9	YBR189W	BY	Haploid	OK	4.095	4.171	0.1681	4.2191	4.171	8.0334	655	4.067	4.166	0.2344	4.2464	4.1664	8.2783	7027
Pilot_screen_BYxRM	haploid-R1	P6	J9	YBR189W	RM	Haploid	OK	4.103	4.217	0.1667	4.2131	4.2169	7.8566	434	4.071	4.199	0.1995	4.2145	4.1988	8.0565	3811
Pilot_screen_BYxRM	haploid-R2	P7	L19,L20	YBR191W	BY	Haploid	Bad-mean	3.53	3.764	0.3828	3.8393	3.7637	7.5472	836	3.548	3.79	0.3338	3.7994	3.7903	7.3865	8720
Pilot_screen_BYxRM	haploid-R2	P7	L19,L20	YBR191W	RM	Haploid	Bad-mean	3.629	3.995	0.4053	3.9055	3.995	7.4826	319	3.493	3.877	0.4729	3.8455	3.8766	7.5675	2973
Pilot_screen_BYxRM	haploid-R1	P7	K20	YBR191W	BY	Haploid	Bad-count-mean	3.848	4.089	0.2398	4.0204	4.0892	7.5676	223	3.731	3.956	0.252	3.9359	3.9556	7.5986	2167
Pilot_screen_BYxRM	haploid-R1	P7	K20	YBR191W	RM	Haploid	Bad-count-mean	3.966	4.191	0.2395	4.1272	4.1912	7.6905	81	3.784	4.066	0.3244	4.0274	4.0659	7.8024	887
Pilot_screen_BYxRM	haploid-R2	P8	E1,E2	YBR193C	BY	Haploid	OK	2.749	2.753	0.035	2.7893	2.753	4.9333	1421	2.803	2.784	0.0834	2.8981	2.7839	5.5204	14055
Pilot_screen_BYxRM	haploid-R2	P8	E1,E2	YBR193C	RM	Haploid	OK	2.649	2.668	0.0342	2.6843	2.6686	4.5443	1316	2.636	2.659	0.0557	2.6913	2.659	4.7797	12079
Pilot_screen_BYxRM	haploid-R1	P8	E1	YBR193C	BY	Haploid	OK	2.955	2.964	0.029	2.9888	2.9644	5.2831	1008	2.988	2.966	0.0623	3.0668	2.9662	5.8655	10393
Pilot_screen_BYxRM	haploid-R1	P8	E1	YBR193C	RM	Haploid	OK	2.976	2.969	0.0251	3.008	2.9686	5.3458	417	3.012	3.003	0.0435	3.0632	3.0035	5.5976	3677
Pilot_screen_BYxRM	haploid-R2	P9	I23,I24	YBR194W	BY	Haploid	Bad-count-mean	2.721	2.75	0.0201	2.7427	2.7496	4.4689	153	2.737	2.736	0.0622	2.8104	2.7364	5.2853	1562
Pilot_screen_BYxRM	haploid-R2	P9	I23,I24	YBR194W	RM	Haploid	Bad-mean	2.629	2.654	0.0351	2.6648	2.6537	4.5411	1533	2.641	2.665	0.0466	2.6876	2.6646	4.6922	14861
Pilot_screen_BYxRM	haploid-R1	P9	J23	YBR194W	BY	Haploid	Bad-mean	2.931	2.927	0.0178	2.9564	2.9265	5.4425	1437	2.942	2.936	0.0336	2.9895	2.9363	5.7535	14192
Pilot_screen_BYxRM	haploid-R1	P9	J23	YBR194W	RM	Haploid	Bad-count-mean	3.13	3.099	0.0618	3.204	3.0988	5.9901	13	3.1	3.096	0.0629	3.1721	3.0957	5.9242	241
Pilot_screen_BYxRM	haploid-R2	P5	K06	YBR195C	BY	Haploid	OK	2.884	2.908	0.0292	2.9153	2.9077	5.0004	359	2.899	2.906	0.0357	2.9378	2.9061	5.1723	4130
Pilot_screen_BYxRM	haploid-R2	P5	K06	YBR195C	RM	Haploid	OK	2.826	2.835	0.0434	2.8831	2.8351	5.6921	320	2.849	2.871	0.0528	2.9095	2.8708	5.7818	2551
Pilot_screen_BYxRM	haploid-R1	P5	K6	YBR195C	BY	Haploid	OK	3.058	3.04	0.0383	3.1099	3.0396	5.8843	490	3.127	3.086	0.0708	3.2155	3.0857	6.1995	6410
Pilot_screen_BYxRM	haploid-R1	P5	K6	YBR195C	RM	Haploid	OK	2.936	2.942	0.0203	2.9607	2.9416	5.1245	764	2.946	2.942	0.0379	3.0115	2.9419	7.0224	5939
Pilot_screen_BYxRM	fillin	Haploid-fillin_P1	D09	YBR195C	BY	Haploid	NA	3.038	3.037	0.0218	3.0643	3.0373	5.2962	1010	3.056	3.035	0.0535	3.1217	3.0349	5.8453	8282
Pilot_screen_BYxRM	fillin	Haploid-fillin_P1	D09	YBR195C	RM	Haploid	NA	2.956	2.963	0.0246	2.9839	2.963	5.0824	436	2.949	2.949	0.037	2.9915	2.9486	5.3381	2934
Pilot_screen_BYxRM	haploid-R2	P3	B04	YBR196C	BY	Haploid	OK	4.597	4.627	0.0733	4.6435	4.6265	8.3988	1674	4.622	4.651	0.0794	4.6749	4.6514	8.5491	16515
Pilot_screen_BYxRM	haploid-R2	P3	B04	YBR196C	RM	Haploid	OK	4.465	4.581	0.2361	4.5963	4.5813	8.5908	545	4.482	4.612	0.2465	4.6208	4.6115	8.6629	5476
Pilot_screen_BYxRM	haploid-R1	P3	B4	YBR196C	BY	Haploid	OK	4.385	4.501	0.1809	4.4905	4.5013	8.243	985	4.363	4.478	0.2046	4.4936	4.4776	8.457	11138
Pilot_screen_BYxRM	haploid-R1	P3	B4	YBR196C	RM	Haploid	OK	4.443	4.486	0.0797	4.4938	4.4856	8.0799	1812	4.437	4.488	0.1153	4.5168	4.4878	8.4014	16738
Pilot_screen_BYxRM	haploid-R2	P8	D17,D18	YBR197C	BY	Haploid	OK	2.776	2.785	0.021	2.7991	2.7853	4.6439	2055	2.807	2.797	0.0567	2.8713	2.7969	5.288	20242
Pilot_screen_BYxRM	haploid-R2	P8	D17,D18	YBR197C	RM	Haploid	OK	2.736	2.751	0.0198	2.7575	2.7506	4.471	1561	2.731	2.747	0.0379	2.7707	2.7466	4.7852	14789
Pilot_screen_BYxRM	haploid-R1	P8	C18	YBR197C	BY	Haploid	OK	2.953	2.954	0.0189	2.9766	2.9538	5.2111	1460	2.982	2.965	0.0483	3.0445	2.9653	5.8048	15193
Pilot_screen_BYxRM	haploid-R1	P8	C18	YBR197C	RM	Haploid	OK	2.951	2.956	0.0176	2.9717	2.9562	5.0515	1035	2.972	2.972	0.0363	3.0161	2.9719	5.8731	9737
Pilot_screen_BYxRM	haploid-R2	P2	J5,J6	YBR198C	BY	Haploid	OK	2.968	2.982	0.0498	3.0233	2.9821	5.6054	1905	3.037	3.014	0.0875	3.1385	3.0138	6.0781	19218
Pilot_screen_BYxRM	haploid-R2	P2	J5,J6	YBR198C	RM	Haploid	OK	2.875	2.907	0.0587	2.9283	2.9069	5.2598	1249	2.871	2.9	0.0683	2.9392	2.8998	5.4726	11889
Pilot_screen_BYxRM	haploid-R1	P2	I6	YBR198C	BY	Haploid	OK	2.985	2.937	0.0569	3.0661	2.9368	6.0035	378	3.066	3.026	0.0858	3.1689	3.0264	6.1402	4982
Pilot_screen_BYxRM	haploid-R1	P2	I6	YBR198C	RM	Haploid	OK	2.872	2.875	0.0174	2.8926	2.8748	4.7885	863	2.869	2.872	0.0365	2.9117	2.8719	5.2969	7405
Pilot_screen_BYxRM	haploid-R2	P10	P10,P9	YBR199W	BY	Haploid	Bad-var	2.7	2.708	0.0232	2.7256	2.7078	4.5768	863	2.694	2.713	0.0554	2.7528	2.7132	5.0009	8822
Pilot_screen_BYxRM	haploid-R2	P10	P10,P9	YBR199W	RM	Haploid	Bad-var	2.665	2.682	0.0318	2.6989	2.6821	4.5656	1126	2.692	2.716	0.0446	2.7374	2.7158	4.8098	10633
Pilot_screen_BYxRM	haploid-R1	P10	P10	YBR199W	BY	Haploid	Bad-var	3.023	3.015	0.0195	3.0594	3.0155	6.0095	1023	3.039	3.021	0.0388	3.0989	3.021	6.1761	10010
Pilot_screen_BYxRM	haploid-R1	P10	P10	YBR199W	RM	Haploid	Bad-var	3.001	2.998	0.0321	3.0769	2.9978	6.5056	262	3.02	3.007	0.0485	3.1206	3.0069	6.7263	2735
Pilot_screen_BYxRM	fillin	Haploid-fillin_P1	D10	YBR199W	BY	Haploid	NA	3.084	3.063	0.0243	3.1167	3.0634	5.6023	1302	3.121	3.076	0.0554	3.1917	3.0764	6.0314	10052
Pilot_screen_BYxRM	fillin	Haploid-fillin_P1	D10	YBR199W	RM	Haploid	NA	3.018	3.02	0.0164	3.0373	3.0197	5.0434	1018	2.993	2.988	0.0297	3.0283	2.9883	5.3353	6325
Pilot_screen_BYxRM	haploid-R2	P4	K23	YBR200W	BY	Haploid	OK	3.056	3.074	0.0217	3.0802	3.0741	5.3703	518	3.072	3.08	0.0254	3.1055	3.0798	5.8366	5432
Pilot_screen_BYxRM	haploid-R2	P4	K23	YBR200W	RM	Haploid	OK	3.003	3.016	0.0333	3.0371	3.0159	5.3292	380	3.026	3.039	0.0288	3.0589	3.0386	5.4833	3661
Pilot_screen_BYxRM	haploid-R1	P4	K23	YBR200W	BY	Haploid	Bad-count	3.111	3.106	0.0323	3.1652	3.1064	6.1424	160	3.134	3.109	0.0445	3.1921	3.109	6.0278	2264
Pilot_screen_BYxRM	haploid-R1	P4	K23	YBR200W	RM	Haploid	OK	3.056	3.051	0.0208	3.0881	3.0512	5.7334	425	3.034	3.042	0.033	3.0757	3.0418	5.7002	3607
Pilot_screen_BYxRM	haploid-R2	P2	E1,E2	YBR202W	BY	Haploid	Bad-mean	3.181	3.196	0.0525	3.2353	3.1958	5.847	2153	3.228	3.248	0.0816	3.3129	3.2481	6.241	21835
Pilot_screen_BYxRM	haploid-R2	P2	E1,E2	YBR202W	RM	Haploid	Bad-mean	3.046	3.046	0.0485	3.0977	3.0458	5.5717	1687	3.051	3.06	0.0666	3.1204	3.0597	5.7647	15860
Pilot_screen_BYxRM	haploid-R1	P2	E1	YBR202W	BY	Haploid	Bad-mean	3.251	3.284	0.0304	3.2838	3.284	5.7722	425	3.26	3.267	0.0473	3.3135	3.2671	6.1553	5862
Pilot_screen_BYxRM	haploid-R1	P2	E1	YBR202W	RM	Haploid	Bad-mean	3.195	3.252	0.0353	3.2304	3.2518	5.5884	1143	3.194	3.23	0.0495	3.2465	3.23	5.874	9740
Pilot_screen_BYxRM	haploid-R2	P11	G23,G24	YBR205W	BY	Haploid	Bad-count	2.654	2.649	0.0765	2.7351	2.6494	5.035	31	2.851	2.839	0.073	2.9302	2.839	5.4619	661
Pilot_screen_BYxRM	haploid-R2	P11	G23,G24	YBR205W	RM	Haploid	Bad-count	2.598	2.612	0.0306	2.6315	2.6123	4.4709	120	2.598	2.607	0.055	2.6553	2.6073	4.7205	1095
Pilot_screen_BYxRM	haploid-R1	P11	G23	YBR205W	BY	Haploid	OK	2.939	2.936	0.0168	2.9613	2.9361	5.1664	1036	2.983	2.948	0.0549	3.0611	2.9479	6.022	10989
Pilot_screen_BYxRM	haploid-R1	P11	G23	YBR205W	RM	Haploid	OK	2.898	2.898	0.0207	2.9238	2.8982	5.0693	767	2.916	2.913	0.0367	2.9662	2.9132	5.9533	6934
Pilot_screen_BYxRM	fillin	Haploid-fillin_P1	D11	YBR205W	BY	Haploid	NA	3.058	3.05	0.0197	3.0831	3.0499	5.3986	1450	3.062	3.036	0.0447	3.1181	3.0357	5.7832	10097
Pilot_screen_BYxRM	fillin	Haploid-fillin_P1	D11	YBR205W	RM	Haploid	NA	3.001	3.005	0.0182	3.0222	3.0054	5.0781	913	2.977	2.977	0.0333	3.0148	2.9771	5.3156	5629
Pilot_screen_BYxRM	haploid-R2	P10	B11,B12	YBR207W	BY	Haploid	OK	2.998	3.041	0.0432	3.0409	3.0408	5.3079	1955	3.01	3.026	0.0774	3.09	3.026	5.7532	19797
Pilot_screen_BYxRM	haploid-R2	P10	B11,B12	YBR207W	RM	Haploid	OK	2.962	2.985	0.0347	2.9951	2.9848	5.1075	1804	2.97	2.99	0.0529	3.0234	2.9902	5.4262	17252
Pilot_screen_BYxRM	haploid-R1	P10	B12	YBR207W	BY	Haploid	OK	3.258	3.268	0.027	3.293	3.2685	6.07	1186	3.272	3.259	0.0527	3.3367	3.2586	6.3181	12278
Pilot_screen_BYxRM	haploid-R1	P10	B12	YBR207W	RM	Haploid	OK	3.198	3.206	0.0262	3.2341	3.2059	6.043	934	3.23	3.226	0.0431	3.2841	3.2263	6.2499	8698
Pilot_screen_BYxRM	fillin	Haploid-fillin_P1	D12	YBR207W	BY	Haploid	NA	3.341	3.353	0.0235	3.3672	3.3529	5.8283	1349	3.356	3.342	0.0451	3.4088	3.3422	6.2679	10331
Pilot_screen_BYxRM	fillin	Haploid-fillin_P1	D12	YBR207W	RM	Haploid	NA	3.273	3.287	0.0214	3.2958	3.2868	5.5751	1452	3.253	3.257	0.0365	3.2933	3.2566	5.9031	8270
Pilot_screen_BYxRM	haploid-R2	P1	C17,C18	YBR208C	BY	Haploid	OK	3.039	3.099	0.0898	3.1169	3.0992	5.7838	1929	3.101	3.133	0.109	3.2088	3.1334	6.243	19142
Pilot_screen_BYxRM	haploid-R2	P1	C17,C18	YBR208C	RM	Haploid	OK	3.027	3.048	0.0538	3.0805	3.0483	5.5843	1750	3.046	3.065	0.0731	3.1211	3.0654	5.8742	16823
Pilot_screen_BYxRM	haploid-R1	P1	C17	YBR208C	BY	Haploid	OK	2.966	2.963	0.0304	3.0323	2.9629	6.6525	1099	3.008	2.975	0.0638	3.1183	2.9747	6.9101	12095
Pilot_screen_BYxRM	haploid-R1	P1	C17	YBR208C	RM	Haploid	OK	2.921	2.912	0.0371	3.0137	2.9118	6.8668	1015	2.953	2.941	0.0519	3.0458	2.9414	6.6872	8947
Pilot_screen_BYxRM	haploid-R2	P6	H24	YBR211C	BY	Haploid	Bad-count	3.04	3.056	0.0377	3.0829	3.0558	5.5978	189	3.069	3.067	0.0343	3.1089	3.0671	5.5729	2459
Pilot_screen_BYxRM	haploid-R2	P6	H24	YBR211C	RM	Haploid	Bad-count	2.984	2.991	0.0331	3.0267	2.9908	5.5729	220	3.005	3.018	0.0401	3.0507	3.0185	5.6138	1615
Pilot_screen_BYxRM	haploid-R1	P6	H24	YBR211C	BY	Haploid	OK	2.972	2.976	0.0158	2.9937	2.9756	5.2999	855	2.987	2.979	0.0299	3.0269	2.9793	5.6316	8586
Pilot_screen_BYxRM	haploid-R1	P6	H24	YBR211C	RM	Haploid	OK	2.958	2.967	0.0149	2.9748	2.9672	4.8841	469	2.958	2.965	0.0258	2.9886	2.9653	5.2475	4604
Pilot_screen_BYxRM	haploid-R2	P3	A13	YBR212W	BY	Haploid	OK	3.215	3.218	0.0158	3.2335	3.2181	5.4322	670	3.233	3.237	0.0201	3.256	3.2369	5.6056	6928
Pilot_screen_BYxRM	haploid-R2	P3	A13	YBR212W	RM	Haploid	OK	3.116	3.119	0.0227	3.1404	3.1185	5.3355	970	3.15	3.156	0.0269	3.1791	3.1562	5.5642	9420
Pilot_screen_BYxRM	haploid-R1	P3	A13	YBR212W	BY	Haploid	OK	3.194	3.188	0.0173	3.2181	3.1885	5.691	687	3.211	3.196	0.0356	3.2581	3.1961	6.1532	8196
Pilot_screen_BYxRM	haploid-R1	P3	A13	YBR212W	RM	Haploid	OK	3.117	3.121	0.0118	3.1301	3.1206	5.0745	2025	3.121	3.123	0.0241	3.1495	3.1226	5.4969	18882
Pilot_screen_BYxRM	haploid-R2	P4	K07	YBR214W	BY	Haploid	OK	3.252	3.26	0.0326	3.2877	3.2603	5.8041	433	3.281	3.282	0.0399	3.3283	3.2819	6.24	4415
Pilot_screen_BYxRM	haploid-R2	P4	K07	YBR214W	RM	Haploid	OK	3.125	3.13	0.0434	3.1758	3.1305	5.9898	743	3.142	3.15	0.0454	3.1956	3.1499	6.2521	7267
Pilot_screen_BYxRM	haploid-R1	P4	K7	YBR214W	BY	Haploid	OK	3.149	3.153	0.0227	3.1741	3.1528	5.4439	550	3.174	3.166	0.0415	3.2234	3.1659	5.9476	6464
Pilot_screen_BYxRM	haploid-R1	P4	K7	YBR214W	RM	Haploid	OK	3.082	3.089	0.0209	3.1047	3.0887	5.249	888	3.086	3.09	0.0294	3.1208	3.0905	5.5377	7854
Pilot_screen_BYxRM	haploid-R2	P11	D5,D6	YBR215W	BY	Haploid	OK	2.709	2.718	0.0227	2.7405	2.7179	5.2842	1289	2.745	2.742	0.0584	2.811	2.7425	5.1998	13250
Pilot_screen_BYxRM	haploid-R2	P11	D5,D6	YBR215W	RM	Haploid	OK	2.625	2.638	0.0304	2.6578	2.6382	4.4783	1433	2.636	2.652	0.0479	2.6857	2.6523	4.7202	14048
Pilot_screen_BYxRM	haploid-R1	P11	D6	YBR215W	BY	Haploid	OK	2.976	2.976	0.019	3.0016	2.9757	5.321	1353	3.008	2.983	0.0452	3.0683	2.9832	5.7732	13582
Pilot_screen_BYxRM	haploid-R1	P11	D6	YBR215W	RM	Haploid	OK	2.918	2.919	0.0229	2.9466	2.9187	5.1355	801	2.932	2.933	0.0394	2.9788	2.933	5.3852	7721
Pilot_screen_BYxRM	fillin	Haploid-fillin_P1	D13	YBR215W	BY	Haploid	NA	3.062	3.06	0.0191	3.0862	3.0598	5.3438	1475	3.08	3.055	0.0429	3.1344	3.0555	5.8479	9769
Pilot_screen_BYxRM	fillin	Haploid-fillin_P1	D13	YBR215W	RM	Haploid	NA	2.975	2.973	0.0253	3.0066	2.9734	5.3735	731	2.993	2.988	0.04	3.0435	2.9878	5.7018	3903
Pilot_screen_BYxRM	haploid-R2	P3	G13	YBR216C	BY	Haploid	Bad-count	3.089	2.974	0.0685	3.175	2.9738	6.0286	5	3.182	3.205	0.0548	3.2362	3.2054	5.816	80
Pilot_screen_BYxRM	haploid-R2	P3	G13	YBR216C	RM	Haploid	Bad-count	3.022	3.054	0.0299	3.0529	3.0537	5.2212	112	3.043	3.062	0.0407	3.0863	3.0625	5.5301	1079
Pilot_screen_BYxRM	haploid-R1	P3	G13	YBR216C	BY	Haploid	OK	3.087	3.083	0.0185	3.1108	3.0835	5.4087	522	3.149	3.108	0.0592	3.2246	3.1085	6.1377	6292
Pilot_screen_BYxRM	haploid-R1	P3	G13	YBR216C	RM	Haploid	OK	3.045	3.05	0.0131	3.0604	3.0505	5.003	1039	3.047	3.049	0.0281	3.0799	3.0489	5.4109	9283
Pilot_screen_BYxRM	haploid-R2	P1	L5,L6	YBR218C	BY	Haploid	OK	3.742	3.776	0.0365	3.7707	3.7759	6.442	1389	3.75	3.771	0.0417	3.7882	3.7707	6.7411	13848
Pilot_screen_BYxRM	haploid-R2	P1	L5,L6	YBR218C	RM	Haploid	OK	3.713	3.735	0.0271	3.7388	3.7352	6.4484	954	3.72	3.736	0.0367	3.7557	3.7363	6.678	9209
Pilot_screen_BYxRM	haploid-R1	P1	K6	YBR218C	BY	Haploid	OK	3.633	3.662	0.033	3.6597	3.6618	6.2117	666	3.619	3.654	0.0434	3.658	3.6539	6.4577	7269
Pilot_screen_BYxRM	haploid-R1	P1	K6	YBR218C	RM	Haploid	OK	3.639	3.654	0.0219	3.6595	3.6544	6.1798	589	3.625	3.649	0.0385	3.6621	3.6488	6.4873	5266
Pilot_screen_BYxRM	haploid-R2	P6	C09	YBR221C	BY	Haploid	Bad-count	3.817	3.877	0.0808	3.8783	3.8775	6.9837	237	3.816	3.888	0.107	3.9017	3.8881	7.2087	3012
Pilot_screen_BYxRM	haploid-R2	P6	C09	YBR221C	RM	Haploid	OK	3.613	3.694	0.0934	3.6893	3.6936	6.732	370	3.601	3.678	0.1078	3.6915	3.6783	6.8529	3006
Pilot_screen_BYxRM	haploid-R1	P6	C9	YBR221C	BY	Haploid	OK	3.589	3.66	0.0865	3.6643	3.6601	6.7291	468	3.623	3.664	0.0935	3.7123	3.6643	7.0017	5753
Pilot_screen_BYxRM	haploid-R1	P6	C9	YBR221C	RM	Haploid	OK	3.555	3.59	0.0418	3.5919	3.5896	6.2533	676	3.539	3.594	0.0666	3.5979	3.594	6.5111	5637
Pilot_screen_BYxRM	fillin	Haploid-fillin_P1	D14	YBR221C	BY	Haploid	NA	3.573	3.68	0.1546	3.7271	3.68	7.2304	155	3.66	3.783	0.213	3.8566	3.7834	7.531	2041
Pilot_screen_BYxRM	fillin	Haploid-fillin_P1	D14	YBR221C	RM	Haploid	NA	3.646	3.685	0.0495	3.6891	3.6854	6.5088	557	3.635	3.668	0.069	3.7017	3.6685	6.8637	3635
Pilot_screen_BYxRM	haploid-R2	P10	M3,M4	YBR222C	BY	Haploid	OK	3.24	3.265	0.0592	3.2978	3.2652	6.0195	1605	3.277	3.285	0.0972	3.3824	3.2846	6.5746	14829
Pilot_screen_BYxRM	haploid-R2	P10	M3,M4	YBR222C	RM	Haploid	OK	3.204	3.205	0.0789	3.2887	3.2055	6.2603	1154	3.21	3.213	0.1048	3.3252	3.2135	6.5148	10944
Pilot_screen_BYxRM	haploid-R1	P10	N3	YBR222C	BY	Haploid	OK	3.546	3.497	0.0575	3.6233	3.4971	7.0095	1023	3.551	3.507	0.0814	3.6583	3.5072	7.27	9991
Pilot_screen_BYxRM	haploid-R1	P10	N3	YBR222C	RM	Haploid	OK	3.375	3.319	0.0705	3.4786	3.3188	6.981	399	3.39	3.331	0.1008	3.531	3.3313	7.1772	4154
Pilot_screen_BYxRM	fillin	Haploid-fillin_P1	D15	YBR222C	BY	Haploid	NA	3.503	3.494	0.0439	3.5555	3.4944	6.6341	1099	3.505	3.478	0.0681	3.5894	3.4779	6.9382	8178
Pilot_screen_BYxRM	fillin	Haploid-fillin_P1	D15	YBR222C	RM	Haploid	NA	3.433	3.415	0.0348	3.4767	3.4151	6.414	1479	3.416	3.397	0.0494	3.4796	3.3972	6.6551	8559
Pilot_screen_BYxRM	haploid-R2	P4	O17	YBR223C	BY	Haploid	Bad-count	2.797	2.807	0.0242	2.8231	2.8074	4.7015	206	2.826	2.829	0.0406	2.8796	2.8291	5.7178	2014
Pilot_screen_BYxRM	haploid-R2	P4	O17	YBR223C	RM	Haploid	OK	2.71	2.724	0.0374	2.752	2.7243	4.8527	394	2.709	2.729	0.0541	2.7723	2.7289	5.5946	3908
Pilot_screen_BYxRM	haploid-R1	P4	O17	YBR223C	BY	Haploid	OK	2.895	2.889	0.0216	2.9218	2.8892	5.0871	471	2.945	2.908	0.058	3.0216	2.9085	5.8103	5503
Pilot_screen_BYxRM	haploid-R1	P4	O17	YBR223C	RM	Haploid	OK	2.837	2.843	0.0216	2.8625	2.8432	4.9007	521	2.849	2.849	0.0356	2.8928	2.8495	5.2577	4387
Pilot_screen_BYxRM	haploid-R2	P2	M19,M20	YBR225W	BY	Haploid	OK	3.156	3.145	0.0361	3.2008	3.1445	5.8613	1782	3.217	3.174	0.0902	3.3203	3.174	6.3779	17917
Pilot_screen_BYxRM	haploid-R2	P2	M19,M20	YBR225W	RM	Haploid	OK	3.073	3.091	0.0375	3.1086	3.0914	5.3685	707	3.09	3.114	0.0411	3.1304	3.1139	5.4933	6727
Pilot_screen_BYxRM	haploid-R1	P2	M19	YBR225W	BY	Haploid	OK	3.02	3.004	0.0283	3.067	3.0044	5.9613	548	3.108	3.048	0.0724	3.201	3.0481	6.1744	6953
Pilot_screen_BYxRM	haploid-R1	P2	M19	YBR225W	RM	Haploid	OK	2.925	2.927	0.0175	2.9458	2.9271	4.9611	1009	2.931	2.931	0.035	2.9724	2.9315	5.3526	8546
Pilot_screen_BYxRM	haploid-R2	P4	A24	YBR227C	BY	Haploid	OK	3.061	3.075	0.0223	3.0853	3.0751	5.2009	728	3.064	3.073	0.0261	3.0933	3.0732	5.3414	7179
Pilot_screen_BYxRM	haploid-R2	P4	A24	YBR227C	RM	Haploid	OK	2.976	2.982	0.0311	3.0176	2.9818	5.943	975	3.003	3.012	0.0343	3.0414	3.012	5.5726	9200
Pilot_screen_BYxRM	haploid-R1	P4	A24	YBR227C	BY	Haploid	OK	3.07	3.07	0.0278	3.1096	3.0699	5.788	599	3.108	3.091	0.053	3.1814	3.0914	6.4358	6905
Pilot_screen_BYxRM	haploid-R1	P4	A24	YBR227C	RM	Haploid	OK	3.022	3.033	0.0213	3.0458	3.0327	5.1691	1570	3.036	3.039	0.0388	3.0788	3.039	5.4822	14774
Pilot_screen_BYxRM	fillin	Haploid-fillin_P1	D16	YBR227C	BY	Haploid	NA	3.209	3.206	0.0207	3.2344	3.2064	5.6444	1272	3.219	3.188	0.0478	3.279	3.1884	6.1374	10332
Pilot_screen_BYxRM	fillin	Haploid-fillin_P1	D16	YBR227C	RM	Haploid	NA	3.143	3.144	0.0168	3.1624	3.1438	5.3612	1408	3.124	3.122	0.0304	3.1592	3.1219	5.6096	8168
Pilot_screen_BYxRM	haploid-R2	P9	G23,G24	YBR230C	BY	Haploid	Bad-mean	2.756	2.74	0.04	2.8106	2.7397	5.2725	2043	2.849	2.761	0.1266	3.0176	2.7608	6.1099	20524
Pilot_screen_BYxRM	haploid-R2	P9	G23,G24	YBR230C	RM	Haploid	Bad-mean	2.567	2.591	0.0341	2.6022	2.5906	4.3758	1826	2.577	2.602	0.0577	2.6342	2.6022	4.7002	17555
Pilot_screen_BYxRM	haploid-R1	P9	G23	YBR230C	BY	Haploid	Bad-mean	2.941	2.942	0.0169	2.9648	2.9424	5.4583	1344	2.976	2.952	0.0456	3.0433	2.9518	5.9211	13251
Pilot_screen_BYxRM	haploid-R1	P9	G23	YBR230C	RM	Haploid	Bad-count-mean	3.083	3.095	0.0158	3.1009	3.0953	5.092	15	3.146	3.187	0.0686	3.2261	3.1868	6.3101	290
Pilot_screen_BYxRM	fillin	Haploid-fillin_P1	D17	YBR230C	BY	Haploid	NA	3.085	3.069	0.0291	3.1308	3.0688	5.9825	1286	3.104	3.047	0.0764	3.2299	3.0467	6.6163	9472
Pilot_screen_BYxRM	fillin	Haploid-fillin_P1	D17	YBR230C	RM	Haploid	NA	2.98	2.982	0.0148	2.9972	2.9825	4.93	884	2.963	2.963	0.0306	2.9996	2.9627	5.3674	4969
Pilot_screen_BYxRM	haploid-R2	P7	K15,K16	YBR231C	BY	Haploid	OK	2.725	2.738	0.021	2.748	2.7378	4.5222	1401	2.76	2.754	0.0415	2.8085	2.7545	5.037	13901
Pilot_screen_BYxRM	haploid-R2	P7	K15,K16	YBR231C	RM	Haploid	OK	2.693	2.708	0.0217	2.7158	2.7077	4.4059	1318	2.692	2.708	0.036	2.7298	2.7077	4.6816	12582
Pilot_screen_BYxRM	haploid-R1	P7	K15	YBR231C	BY	Haploid	OK	2.977	2.962	0.0215	3.0082	2.962	5.4643	426	3.007	2.986	0.0452	3.067	2.9862	5.8486	4217
Pilot_screen_BYxRM	haploid-R1	P7	K15	YBR231C	RM	Haploid	Bad-count	2.97	2.962	0.0225	2.9989	2.9622	5.2594	118	2.988	2.98	0.0316	3.0262	2.9798	5.4363	1193
Pilot_screen_BYxRM	haploid-R2	P5	F19	YBR233W	BY	Haploid	OK	2.969	2.996	0.0302	2.9971	2.996	5.0512	287	2.974	2.985	0.0315	3.0091	2.9851	5.34	2947
Pilot_screen_BYxRM	haploid-R2	P5	F19	YBR233W	RM	Haploid	OK	2.913	2.933	0.0346	2.9495	2.933	5.1028	273	2.925	2.948	0.0396	2.9659	2.9484	5.3077	2658
Pilot_screen_BYxRM	haploid-R1	P5	F19	YBR233W	BY	Haploid	OK	2.983	2.985	0.0213	3.0088	2.9848	5.2538	650	3.055	3.017	0.0616	3.133	3.017	5.9746	7828
Pilot_screen_BYxRM	haploid-R1	P5	F19	YBR233W	RM	Haploid	OK	2.956	2.959	0.0157	2.9738	2.9593	4.8748	1148	2.956	2.955	0.0352	2.9955	2.9552	5.3086	10015
Pilot_screen_BYxRM	haploid-R2	P9	B23,B24	YBR233W-A	BY	Haploid	OK	2.767	2.772	0.0152	2.7845	2.7717	4.5073	1036	2.78	2.781	0.0372	2.8226	2.7809	5.0261	10484
Pilot_screen_BYxRM	haploid-R2	P9	B23,B24	YBR233W-A	RM	Haploid	OK	2.715	2.726	0.0228	2.7397	2.7262	4.5215	1988	2.729	2.742	0.0373	2.768	2.7422	4.7827	19205
Pilot_screen_BYxRM	haploid-R1	P9	B24	YBR233W-A	BY	Haploid	OK	3.048	3.049	0.0158	3.068	3.0495	5.2688	2444	3.067	3.055	0.0355	3.1126	3.0551	5.7367	24071
Pilot_screen_BYxRM	haploid-R1	P9	B24	YBR233W-A	RM	Haploid	Bad-count	3.097	3.099	0.1451	3.2353	3.0995	6.2	36	3.172	3.219	0.0823	3.2545	3.2189	6.2143	628
Pilot_screen_BYxRM	haploid-R2	P5	F10	YBR234C	BY	Haploid	Bad-count	3.497	3.471	0.0768	3.5765	3.4712	6.6741	206	3.526	3.559	0.0766	3.6031	3.5595	6.7289	2429
Pilot_screen_BYxRM	haploid-R2	P5	F10	YBR234C	RM	Haploid	OK	3.331	3.31	0.0608	3.4015	3.3104	6.3629	309	3.342	3.329	0.0812	3.4306	3.3291	6.5204	2704
Pilot_screen_BYxRM	haploid-R1	P5	F10	YBR234C	BY	Haploid	OK	3.478	3.546	0.0593	3.5387	3.546	6.482	482	3.516	3.565	0.0917	3.6125	3.5647	6.8842	5952
Pilot_screen_BYxRM	haploid-R1	P5	F10	YBR234C	RM	Haploid	OK	3.318	3.277	0.0448	3.3743	3.2766	6.266	561	3.308	3.265	0.0703	3.3925	3.2654	6.5031	4430
Pilot_screen_BYxRM	haploid-R2	P5	O24	YBR236C	BY	Haploid	OK	2.992	3.003	0.0208	3.0144	3.0028	5.0124	515	2.991	3.005	0.027	3.0199	3.0054	5.1898	5454
Pilot_screen_BYxRM	haploid-R2	P5	O24	YBR236C	RM	Haploid	OK	2.971	2.991	0.0215	2.9951	2.9906	5.0603	510	2.976	2.992	0.0264	3.0041	2.9924	5.1048	4732
Pilot_screen_BYxRM	haploid-R1	P5	O24	YBR236C	BY	Haploid	OK	3.038	3.033	0.0221	3.0697	3.0327	5.5686	616	3.069	3.035	0.053	3.1427	3.0345	6.0931	6858
Pilot_screen_BYxRM	haploid-R1	P5	O24	YBR236C	RM	Haploid	OK	2.983	2.985	0.017	3.0034	2.9853	5.055	794	2.994	2.996	0.0292	3.0282	2.9956	5.3395	7132
Pilot_screen_BYxRM	fillin	Haploid-fillin_P1	D18	YBR236C	BY	Haploid	NA	3.118	3.117	0.021	3.1435	3.1167	5.5101	979	3.126	3.098	0.0421	3.179	3.0982	5.8865	8340
Pilot_screen_BYxRM	fillin	Haploid-fillin_P1	D18	YBR236C	RM	Haploid	NA	3.071	3.071	0.0139	3.0874	3.0711	5.1547	1240	3.049	3.048	0.0278	3.0814	3.0479	5.406	7189
Pilot_screen_BYxRM	haploid-R2	P2	M1,M2	YBR237W	BY	Haploid	OK	3.133	3.142	0.0252	3.1617	3.142	5.588	1253	3.194	3.166	0.0601	3.2662	3.1656	6.1562	12588
Pilot_screen_BYxRM	haploid-R2	P2	M1,M2	YBR237W	RM	Haploid	OK	3.054	3.072	0.0285	3.0844	3.0722	5.3531	1116	3.053	3.07	0.046	3.1003	3.0703	5.546	9930
Pilot_screen_BYxRM	haploid-R1	P2	M1	YBR237W	BY	Haploid	OK	3.107	3.071	0.0334	3.155	3.0714	5.8859	369	3.152	3.088	0.0677	3.2428	3.0882	6.3627	4663
Pilot_screen_BYxRM	haploid-R1	P2	M1	YBR237W	RM	Haploid	OK	2.998	3.003	0.0157	3.0209	3.0031	5.5769	859	3.014	3.013	0.0279	3.0504	3.013	5.9335	7540
Pilot_screen_BYxRM	haploid-R2	P2	H23,H24	YBR238C	BY	Haploid	OK	3.124	3.128	0.0434	3.1727	3.1284	5.8199	1126	3.184	3.171	0.0775	3.2717	3.1714	6.2594	11768
Pilot_screen_BYxRM	haploid-R2	P2	H23,H24	YBR238C	RM	Haploid	OK	3.054	3.063	0.0278	3.0838	3.0631	5.3328	1241	3.031	3.051	0.0518	3.0836	3.0508	5.5485	10823
Pilot_screen_BYxRM	haploid-R1	P2	H24	YBR238C	BY	Haploid	OK	3.029	3.015	0.026	3.0645	3.0151	5.5407	340	3.086	3.041	0.0704	3.1752	3.0406	6.1159	4535
Pilot_screen_BYxRM	haploid-R1	P2	H24	YBR238C	RM	Haploid	OK	2.983	2.988	0.021	3.0187	2.9884	5.9921	452	2.991	2.985	0.0419	3.0704	2.9848	6.7169	3399
Pilot_screen_BYxRM	haploid-R2	P4	C09	YBR239C	BY	Haploid	OK	2.878	2.884	0.0217	2.9022	2.8839	4.8668	623	2.88	2.893	0.0329	2.9289	2.8931	6.3092	6650
Pilot_screen_BYxRM	haploid-R2	P4	C09	YBR239C	RM	Haploid	OK	2.789	2.8	0.0375	2.8338	2.8004	5.1658	433	2.81	2.828	0.0397	2.8542	2.8285	5.1746	3823
Pilot_screen_BYxRM	haploid-R1	P4	C9	YBR239C	BY	Haploid	OK	2.938	2.942	0.0187	2.9607	2.9419	5.0208	477	2.98	2.962	0.0478	3.0396	2.962	5.6825	5561
Pilot_screen_BYxRM	haploid-R1	P4	C9	YBR239C	RM	Haploid	OK	2.883	2.886	0.0151	2.9013	2.8858	4.8925	1034	2.891	2.893	0.0332	2.9323	2.8931	5.4738	9608
Pilot_screen_BYxRM	haploid-R2	P10	F15,F16	YBR241C	BY	Haploid	OK	2.822	2.824	0.0361	2.8632	2.824	5.0849	2074	2.871	2.845	0.0879	2.9772	2.8447	5.7712	20915
Pilot_screen_BYxRM	haploid-R2	P10	F15,F16	YBR241C	RM	Haploid	OK	2.702	2.718	0.0401	2.7464	2.7184	4.8642	1512	2.725	2.735	0.0612	2.7913	2.7355	5.1252	13544
Pilot_screen_BYxRM	haploid-R1	P10	F16	YBR241C	BY	Haploid	OK	3.111	3.092	0.0367	3.159	3.0925	5.8964	1011	3.16	3.109	0.0863	3.2772	3.1095	6.5176	10844
Pilot_screen_BYxRM	haploid-R1	P10	F16	YBR241C	RM	Haploid	OK	3.022	2.999	0.0316	3.0622	2.9993	5.5406	534	3.07	3.045	0.0538	3.1375	3.0454	5.9326	4471
Pilot_screen_BYxRM	fillin	Haploid-fillin_P1	D19	YBR241C	BY	Haploid	NA	3.145	3.13	0.0307	3.1859	3.1296	5.8485	1000	3.17	3.126	0.0666	3.2595	3.1261	6.342	8336
Pilot_screen_BYxRM	fillin	Haploid-fillin_P1	D19	YBR241C	RM	Haploid	NA	3.029	3.032	0.0193	3.0509	3.0316	5.1392	986	3.034	3.029	0.0353	3.0764	3.0291	5.5517	5357
Pilot_screen_BYxRM	haploid-R2	P8	K19,K20	YBR242W	BY	Haploid	OK	2.751	2.767	0.0285	2.7822	2.7668	4.7384	1726	2.786	2.792	0.0525	2.8431	2.7918	5.1486	17214
Pilot_screen_BYxRM	haploid-R2	P8	K19,K20	YBR242W	RM	Haploid	OK	2.699	2.714	0.0267	2.7276	2.7145	4.5316	695	2.683	2.702	0.0501	2.735	2.7024	4.8615	6760
Pilot_screen_BYxRM	haploid-R1	P8	K19	YBR242W	BY	Haploid	OK	2.956	2.961	0.017	2.9769	2.9615	5.0803	1097	2.974	2.961	0.0405	3.0317	2.9615	6.4568	11224
Pilot_screen_BYxRM	haploid-R1	P8	K19	YBR242W	RM	Haploid	OK	3.002	3.011	0.0166	3.0203	3.011	4.9815	392	3.019	3.027	0.0341	3.0585	3.027	5.4499	3534
Pilot_screen_BYxRM	haploid-R2	P9	A19,A20	YBR244W	BY	Haploid	OK	2.875	2.882	0.0463	2.9258	2.8825	5.2435	2302	2.89	2.9	0.0622	2.9569	2.8997	5.4342	22876
Pilot_screen_BYxRM	haploid-R2	P9	A19,A20	YBR244W	RM	Haploid	OK	2.805	2.821	0.0616	2.8704	2.8213	5.2378	2051	2.836	2.849	0.0688	2.9101	2.8486	5.3901	19957
Pilot_screen_BYxRM	haploid-R1	P9	A19	YBR244W	BY	Haploid	OK	3.135	3.133	0.0293	3.169	3.1334	5.5711	2958	3.152	3.154	0.0438	3.2027	3.1539	5.8516	28993
Pilot_screen_BYxRM	haploid-R1	P9	A19	YBR244W	RM	Haploid	Bad-count	3.109	3.12	0.0328	3.1434	3.1196	5.4804	59	3.145	3.155	0.0592	3.2113	3.1548	6.0774	925
Pilot_screen_BYxRM	fillin	Haploid-fillin_P1	D20	YBR244W	BY	Haploid	NA	3.208	3.202	0.0353	3.2497	3.2022	5.8645	1504	3.221	3.215	0.0535	3.2826	3.2153	6.0722	11397
Pilot_screen_BYxRM	fillin	Haploid-fillin_P1	D20	YBR244W	RM	Haploid	NA	3.176	3.167	0.0425	3.2261	3.1673	5.9015	1355	3.15	3.147	0.0552	3.2143	3.1467	5.9707	7917
Pilot_screen_BYxRM	haploid-R2	P1	E23,E24	YBR245C	BY	Haploid	OK	3.419	3.354	0.0551	3.4833	3.3538	6.5545	1164	3.449	3.403	0.0653	3.5232	3.4028	6.6638	11412
Pilot_screen_BYxRM	haploid-R2	P1	E23,E24	YBR245C	RM	Haploid	OK	3.232	3.244	0.0202	3.2552	3.2444	5.6957	1393	3.242	3.253	0.0313	3.2757	3.253	5.8093	13357
Pilot_screen_BYxRM	haploid-R1	P1	F23	YBR245C	BY	Haploid	OK	3.213	3.215	0.0205	3.239	3.2155	5.7681	463	3.244	3.235	0.0403	3.2938	3.2348	6.0931	5460
Pilot_screen_BYxRM	haploid-R1	P1	F23	YBR245C	RM	Haploid	OK	3.191	3.199	0.0122	3.2069	3.1992	5.4824	1170	3.189	3.193	0.0222	3.2165	3.193	5.7581	10800
Pilot_screen_BYxRM	haploid-R2	P4	F05	YBR247C	BY	Haploid	OK	3.373	3.402	0.0227	3.3958	3.4025	5.7504	720	3.351	3.372	0.0285	3.3965	3.3717	7.3332	7417
Pilot_screen_BYxRM	haploid-R2	P4	F05	YBR247C	RM	Haploid	OK	3.346	3.366	0.0224	3.3689	3.3663	5.6803	668	3.35	3.379	0.0379	3.4037	3.3789	7.224	5935
Pilot_screen_BYxRM	haploid-R1	P4	F5	YBR247C	BY	Haploid	OK	3.313	3.336	0.0263	3.3407	3.3365	5.7401	456	3.32	3.332	0.0421	3.3705	3.3322	6.6889	5480
Pilot_screen_BYxRM	haploid-R1	P4	F5	YBR247C	RM	Haploid	OK	3.336	3.35	0.0154	3.3515	3.3502	5.4726	890	3.325	3.344	0.0308	3.3624	3.3437	6.765	7970
Pilot_screen_BYxRM	haploid-R2	P11	D10,D9	YBR248C	BY	Haploid	OK	3.175	3.22	0.0668	3.2469	3.2197	6.1082	1246	3.232	3.225	0.142	3.4044	3.2246	6.9005	12686
Pilot_screen_BYxRM	haploid-R2	P11	D10,D9	YBR248C	RM	Haploid	OK	3.235	3.26	0.0554	3.2846	3.2598	5.8246	1647	3.249	3.281	0.0756	3.319	3.2814	6.0969	15771
Pilot_screen_BYxRM	haploid-R1	P11	D10	YBR248C	BY	Haploid	OK	3.461	3.465	0.0323	3.5004	3.4646	6.4976	868	3.496	3.459	0.0884	3.6255	3.4588	7.3506	9482
Pilot_screen_BYxRM	haploid-R1	P11	D10	YBR248C	RM	Haploid	OK	3.468	3.483	0.0205	3.4891	3.483	5.9083	734	3.469	3.482	0.0368	3.508	3.4817	6.2674	6496
Pilot_screen_BYxRM	haploid-R2	P6	I15	YBR249C	BY	Haploid	OK	4.126	4.179	0.0749	4.1809	4.179	7.5206	921	4.106	4.155	0.0844	4.171	4.1546	7.6898	9328
Pilot_screen_BYxRM	haploid-R2	P6	I15	YBR249C	RM	Haploid	Bad-count	4.09	4.19	0.125	4.1755	4.1903	7.6231	212	4.04	4.175	0.1857	4.1692	4.1752	7.8173	1969
Pilot_screen_BYxRM	haploid-R1	P6	I15	YBR249C	BY	Haploid	OK	3.981	4.002	0.0276	4.004	4.0025	6.8584	860	3.957	3.997	0.0565	4.0009	3.9975	7.1294	8345
Pilot_screen_BYxRM	haploid-R1	P6	I15	YBR249C	RM	Haploid	OK	3.976	4.035	0.0815	4.0323	4.0353	7.1526	410	3.913	4.027	0.1447	4.0137	4.0271	7.3724	4284
Pilot_screen_BYxRM	haploid-R2	P7	O21,O22	YBR251W	BY	Haploid	OK	2.867	2.874	0.0148	2.883	2.8737	4.6356	1411	2.879	2.887	0.0268	2.9094	2.8872	5.0179	13968
Pilot_screen_BYxRM	haploid-R2	P7	O21,O22	YBR251W	RM	Haploid	OK	2.821	2.837	0.0276	2.8489	2.8373	4.7643	1161	2.831	2.852	0.0367	2.8685	2.8519	4.9531	11350
Pilot_screen_BYxRM	haploid-R1	P7	O21	YBR251W	BY	Haploid	OK	3.079	3.088	0.0137	3.0962	3.088	5.3222	492	3.083	3.077	0.0318	3.1258	3.0766	5.8822	4755
Pilot_screen_BYxRM	haploid-R1	P7	O21	YBR251W	RM	Haploid	Bad-count	3.039	3.037	0.0146	3.0593	3.037	5.4445	221	3.039	3.046	0.0271	3.07	3.0458	5.3701	2292
Pilot_screen_BYxRM	haploid-R2	P9	P23,P24	YBR252W	BY	Haploid	OK	2.929	2.948	0.0289	2.9597	2.9483	5.0378	1160	2.905	2.932	0.0562	2.9627	2.9318	5.3469	11632
Pilot_screen_BYxRM	haploid-R2	P9	P23,P24	YBR252W	RM	Haploid	OK	2.892	2.907	0.0319	2.9268	2.9071	5.0441	1273	2.915	2.929	0.0441	2.9614	2.9286	5.3153	12270
Pilot_screen_BYxRM	haploid-R1	P9	O24	YBR252W	BY	Haploid	OK	3.141	3.15	0.0197	3.1677	3.1499	5.8997	687	3.158	3.155	0.0349	3.2059	3.1548	6.1898	6858
Pilot_screen_BYxRM	haploid-R1	P9	O24	YBR252W	RM	Haploid	OK	3.153	3.162	0.0282	3.2073	3.1624	6.6243	503	3.149	3.152	0.038	3.2111	3.152	6.5615	4989
Pilot_screen_BYxRM	haploid-R2	P9	A21,A22	YBR253W	BY	Haploid	Bad-mean-var	2.841	2.803	0.0594	2.9282	2.803	5.7712	2526	2.866	2.816	0.0863	2.9818	2.8157	5.9686	25164
Pilot_screen_BYxRM	haploid-R2	P9	A21,A22	YBR253W	RM	Haploid	Bad-mean-var	2.695	2.706	0.0319	2.7527	2.706	5.7865	2293	2.703	2.718	0.0465	2.7657	2.7176	5.6581	22512
Pilot_screen_BYxRM	haploid-R1	P9	B21	YBR253W	BY	Haploid	Bad-mean-var	3.018	3.021	0.0157	3.0363	3.0214	5.0492	2025	3.038	3.027	0.0364	3.0834	3.0268	5.7563	19927
Pilot_screen_BYxRM	haploid-R1	P9	B21	YBR253W	RM	Haploid	Bad-count-mean-var	3.237	3.264	0.0174	3.2562	3.2644	5.4562	15	3.211	3.252	0.0618	3.2722	3.2518	5.9422	381
Pilot_screen_BYxRM	fillin	Haploid-fillin_P1	D21	YBR253W	BY	Haploid	NA	3.129	3.131	0.0193	3.1516	3.1311	5.4175	955	3.135	3.106	0.0434	3.1908	3.1059	5.9559	8691
Pilot_screen_BYxRM	fillin	Haploid-fillin_P1	D21	YBR253W	RM	Haploid	NA	3.051	3.052	0.0145	3.0684	3.0523	5.1089	1111	3.046	3.045	0.0261	3.0763	3.0455	5.3522	6318
Pilot_screen_BYxRM	haploid-R2	P11	A7,A8	YBR254C	BY	Haploid	OK	2.769	2.772	0.0259	2.8002	2.7718	4.8498	2625	2.792	2.789	0.0643	2.8643	2.7889	5.2982	26302
Pilot_screen_BYxRM	haploid-R2	P11	A7,A8	YBR254C	RM	Haploid	OK	2.735	2.74	0.0207	2.7588	2.7397	4.5549	1488	2.726	2.734	0.0409	2.7695	2.7339	4.8497	13634
Pilot_screen_BYxRM	haploid-R1	P11	B7	YBR254C	BY	Haploid	OK	3.041	3.031	0.0187	3.0662	3.0312	5.4408	905	3.06	3.039	0.0473	3.1214	3.039	5.8961	9816
Pilot_screen_BYxRM	haploid-R1	P11	B7	YBR254C	RM	Haploid	OK	2.991	2.993	0.0154	3.0106	2.9933	5.1584	867	3.012	3.017	0.0367	3.0546	3.0167	5.5001	7776
Pilot_screen_BYxRM	fillin	Haploid-fillin_P1	D22	YBR254C	BY	Haploid	NA	3.129	3.129	0.0216	3.1555	3.1286	5.534	1340	3.161	3.134	0.0447	3.216	3.1344	5.9441	9717
Pilot_screen_BYxRM	fillin	Haploid-fillin_P1	D22	YBR254C	RM	Haploid	NA	3.071	3.08	0.0136	3.0867	3.0795	5.0278	969	3.065	3.065	0.0312	3.1007	3.0648	5.4658	5467
Pilot_screen_BYxRM	haploid-R2	P2	L3,L4	YBR255W	BY	Haploid	OK	3.026	3.033	0.0289	3.0616	3.0331	5.5695	1610	3.082	3.057	0.0744	3.1741	3.0571	6.3901	16570
Pilot_screen_BYxRM	haploid-R2	P2	L3,L4	YBR255W	RM	Haploid	OK	2.945	2.966	0.0326	2.9788	2.9658	5.1287	1205	2.955	2.972	0.0515	3.0106	2.9724	5.872	11170
Pilot_screen_BYxRM	haploid-R1	P2	L4	YBR255W	BY	Haploid	Bad-count	3.12	3.075	0.048	3.1848	3.0751	6.0191	102	3.193	3.161	0.0743	3.2852	3.1613	6.4426	1554
Pilot_screen_BYxRM	haploid-R1	P2	L4	YBR255W	RM	Haploid	OK	2.955	2.96	0.0153	2.973	2.96	4.8742	435	2.956	2.958	0.0323	2.9979	2.9577	5.6343	3747
Pilot_screen_BYxRM	fillin	Haploid-fillin_P1	D23	YBR255W	BY	Haploid	NA	3.021	3.008	0.0256	3.056	3.0076	5.5528	1327	3.051	3.011	0.0528	3.1193	3.0107	5.9033	9566
Pilot_screen_BYxRM	fillin	Haploid-fillin_P1	D23	YBR255W	RM	Haploid	NA	2.947	2.953	0.0154	2.9645	2.9534	4.8524	1195	2.931	2.936	0.031	2.967	2.9356	5.2148	6157
Pilot_screen_BYxRM	haploid-R2	P8	I19,I20	YBR256C	BY	Haploid	Bad-var	2.578	2.587	0.0318	2.6171	2.5874	4.8672	1516	2.647	2.622	0.0823	2.7479	2.6225	5.5505	15209
Pilot_screen_BYxRM	haploid-R2	P8	I19,I20	YBR256C	RM	Haploid	Bad-var	2.451	2.483	0.0508	2.5002	2.4829	4.3054	1397	2.457	2.489	0.0653	2.5198	2.4887	4.4751	13670
Pilot_screen_BYxRM	haploid-R1	P8	I19	YBR256C	BY	Haploid	Bad-var	2.833	2.828	0.0287	2.8895	2.8278	6.0641	1081	2.867	2.83	0.0677	2.9637	2.8305	5.9075	11287
Pilot_screen_BYxRM	haploid-R1	P8	I19	YBR256C	RM	Haploid	Bad-var	2.789	2.79	0.0366	2.8655	2.7897	6.3782	544	2.82	2.823	0.0505	2.8863	2.8226	5.7787	4881
Pilot_screen_BYxRM	haploid-R2	P9	P17,P18	YBR258C	BY	Haploid	Bad-var	2.783	2.794	0.017	2.8018	2.7943	4.5226	1698	2.791	2.799	0.0399	2.8347	2.7987	4.9817	16888
Pilot_screen_BYxRM	haploid-R2	P9	P17,P18	YBR258C	RM	Haploid	Bad-var	2.698	2.714	0.0337	2.7331	2.7145	4.6388	1328	2.72	2.741	0.0472	2.7685	2.7414	5.0867	12900
Pilot_screen_BYxRM	haploid-R1	P9	O18	YBR258C	BY	Haploid	Bad-var	3.116	3.052	0.0684	3.2343	3.0524	6.8492	778	3.137	3.073	0.0863	3.274	3.0733	6.923	7868
Pilot_screen_BYxRM	haploid-R1	P9	O18	YBR258C	RM	Haploid	Bad-var	3.088	3.006	0.0789	3.2191	3.0065	6.825	565	3.103	3.051	0.0826	3.2208	3.0512	6.6357	5536
Pilot_screen_BYxRM	haploid-R2	P3	E23	YBR259W	BY	Haploid	OK	2.829	2.836	0.032	2.8635	2.8357	5.0048	666	2.851	2.858	0.0342	2.8907	2.858	5.2751	6327
Pilot_screen_BYxRM	haploid-R2	P3	E23	YBR259W	RM	Haploid	OK	2.744	2.759	0.0432	2.7905	2.7595	4.9631	597	2.789	2.81	0.0464	2.8391	2.8102	5.4958	6421
Pilot_screen_BYxRM	haploid-R1	P3	E23	YBR259W	BY	Haploid	OK	2.88	2.885	0.0206	2.9074	2.8849	5.1886	452	2.957	2.922	0.0621	3.0355	2.9216	5.7688	5940
Pilot_screen_BYxRM	haploid-R1	P3	E23	YBR259W	RM	Haploid	OK	2.826	2.832	0.0204	2.8495	2.8324	4.9141	1329	2.829	2.833	0.0385	2.8888	2.833	6.4223	11868
Pilot_screen_BYxRM	haploid-R2	P3	M07	YBR260C	BY	Haploid	OK	3.114	3.119	0.0152	3.1306	3.1192	5.1647	510	3.13	3.136	0.0159	3.1487	3.1361	5.4616	5155
Pilot_screen_BYxRM	haploid-R2	P3	M07	YBR260C	RM	Haploid	OK	3.068	3.092	0.0295	3.0977	3.0919	5.2758	268	3.09	3.107	0.0267	3.1178	3.1066	5.2993	2605
Pilot_screen_BYxRM	haploid-R1	P3	M7	YBR260C	BY	Haploid	Bad-count	3.163	3.159	0.0192	3.1916	3.1588	5.8292	219	3.197	3.173	0.0458	3.2525	3.1727	6.0386	3126
Pilot_screen_BYxRM	haploid-R1	P3	M7	YBR260C	RM	Haploid	OK	3.089	3.089	0.0111	3.1015	3.0893	5.0141	838	3.085	3.087	0.0235	3.1129	3.0871	5.4081	7386
Pilot_screen_BYxRM	haploid-R2	P8	A13,A14	YBR261C	BY	Haploid	OK	2.854	2.867	0.033	2.8904	2.8666	5.0162	2014	2.9	2.888	0.0654	2.9739	2.8877	5.5336	19991
Pilot_screen_BYxRM	haploid-R2	P8	A13,A14	YBR261C	RM	Haploid	OK	2.816	2.824	0.0253	2.8429	2.8246	4.7366	1198	2.809	2.823	0.0446	2.8571	2.8229	5.0663	11489
Pilot_screen_BYxRM	haploid-R1	P8	A13	YBR261C	BY	Haploid	OK	3.021	3.022	0.0246	3.0509	3.0218	5.3491	1424	3.073	3.055	0.0573	3.1446	3.0547	5.9682	14486
Pilot_screen_BYxRM	haploid-R1	P8	A13	YBR261C	RM	Haploid	OK	3.041	3.041	0.0221	3.0674	3.041	5.3201	1201	3.056	3.055	0.0404	3.1024	3.0547	5.5963	11330
Pilot_screen_BYxRM	haploid-R2	P9	E10,E9	YBR262C	BY	Haploid	OK	3.012	3.034	0.0255	3.0383	3.0336	5.0874	1828	3.011	3.026	0.0359	3.0486	3.026	5.3101	18148
Pilot_screen_BYxRM	haploid-R2	P9	E10,E9	YBR262C	RM	Haploid	OK	3.019	3.034	0.023	3.0424	3.0336	5.0504	1986	3.02	3.034	0.0431	3.0637	3.034	5.4221	19599
Pilot_screen_BYxRM	haploid-R1	P9	F9	YBR262C	BY	Haploid	OK	3.196	3.208	0.0249	3.2236	3.2079	5.5741	1027	3.196	3.197	0.0392	3.2404	3.1966	5.8624	10912
Pilot_screen_BYxRM	haploid-R1	P9	F9	YBR262C	RM	Haploid	OK	3.216	3.207	0.0194	3.2429	3.2075	6.0426	750	3.223	3.221	0.0364	3.2645	3.221	5.9572	6893
Pilot_screen_BYxRM	haploid-R2	P3	H12	YBR263W	BY	Haploid	Bad-var	3.388	3.41	0.031	3.4198	3.4096	6.0318	1303	3.406	3.428	0.0386	3.4578	3.4285	7.3662	12724
Pilot_screen_BYxRM	haploid-R2	P3	H12	YBR263W	RM	Haploid	Bad-var	3.253	3.269	0.0801	3.4223	3.2693	7.9652	491	3.304	3.324	0.0681	3.3968	3.3235	7.3925	5166
Pilot_screen_BYxRM	haploid-R1	P3	H12	YBR263W	BY	Haploid	Bad-var	3.321	3.354	0.0317	3.3527	3.3544	5.7897	606	3.347	3.356	0.054	3.4071	3.3556	6.3168	6982
Pilot_screen_BYxRM	haploid-R1	P3	H12	YBR263W	RM	Haploid	Bad-var	3.279	3.288	0.0172	3.2969	3.2883	5.4898	792	3.261	3.268	0.0313	3.2955	3.2681	5.8308	6960
Pilot_screen_BYxRM	fillin	Haploid-fillin_P1	D24	YBR263W	BY	Haploid	NA	3.425	3.443	0.0269	3.4529	3.4426	5.9848	1239	3.42	3.415	0.0422	3.4686	3.4146	6.3434	10031
Pilot_screen_BYxRM	fillin	Haploid-fillin_P1	D24	YBR263W	RM	Haploid	NA	3.361	3.373	0.0212	3.3824	3.3733	5.7204	1187	3.322	3.331	0.0375	3.3628	3.3308	6.033	8034
Pilot_screen_BYxRM	haploid-R2	P11	C19,C20	YBR264C	BY	Haploid	OK	2.665	2.68	0.0236	2.691	2.6803	4.4954	2421	2.694	2.694	0.0599	2.7603	2.6942	5.0622	23981
Pilot_screen_BYxRM	haploid-R2	P11	C19,C20	YBR264C	RM	Haploid	OK	2.64	2.651	0.0331	2.6751	2.6514	4.5405	1749	2.657	2.674	0.0483	2.7071	2.6738	4.7622	16925
Pilot_screen_BYxRM	haploid-R1	P11	D19	YBR264C	BY	Haploid	OK	2.957	2.956	0.0173	2.9785	2.9561	5.1245	1038	2.979	2.959	0.042	3.0351	2.9593	5.726	10753
Pilot_screen_BYxRM	haploid-R1	P11	D19	YBR264C	RM	Haploid	OK	2.905	2.902	0.0209	2.9318	2.9016	5.1688	723	2.935	2.934	0.0378	2.9804	2.934	5.4259	6753
Pilot_screen_BYxRM	fillin	Haploid-fillin_P1	E01	YBR264C	BY	Haploid	NA	3.058	3.046	0.0265	3.0917	3.0457	5.4953	1436	3.089	3.048	0.0612	3.1654	3.0479	6.0099	12975
Pilot_screen_BYxRM	fillin	Haploid-fillin_P1	E01	YBR264C	RM	Haploid	NA	2.977	2.98	0.0217	3.0031	2.9797	5.1858	1040	2.952	2.947	0.0387	2.9973	2.9474	5.4123	6707
Pilot_screen_BYxRM	haploid-R2	P11	I1,I2	YBR265W	BY	Haploid	Bad-count-mean-var	3.036	3.079	0.074	3.1154	3.0788	5.7386	29	3.003	3.008	0.0634	3.0705	3.008	5.6268	574
Pilot_screen_BYxRM	haploid-R2	P11	I1,I2	YBR265W	RM	Haploid	Bad-count-mean-var	2.674	2.67	0.0316	2.7105	2.6709	4.689	46	2.706	2.72	0.0536	2.7607	2.7205	4.9001	469
Pilot_screen_BYxRM	haploid-R1	P11	I1	YBR265W	BY	Haploid	Bad-mean-var	3.082	3.069	0.037	3.2101	3.0688	7.3206	454	3.108	3.064	0.0591	3.2392	3.064	7.2475	5447
Pilot_screen_BYxRM	haploid-R1	P11	I1	YBR265W	RM	Haploid	Bad-mean-var	3.02	3.028	0.0149	3.0371	3.0278	4.9874	609	3.043	3.036	0.0382	3.1548	3.0365	7.2082	5128
Pilot_screen_BYxRM	fillin	Haploid-fillin_P1	E02	YBR265W	BY	Haploid	NA	3.162	3.148	0.0255	3.1939	3.148	5.6837	1332	3.187	3.154	0.0536	3.2531	3.1537	6.0899	11158
Pilot_screen_BYxRM	fillin	Haploid-fillin_P1	E02	YBR265W	RM	Haploid	NA	3.072	3.071	0.0161	3.0905	3.0709	5.155	1074	3.05	3.052	0.0293	3.0835	3.0519	5.4193	6439
Pilot_screen_BYxRM	haploid-R2	P5	J20	YBR267W	BY	Haploid	Bad-count	3.383	3.439	0.0647	3.4513	3.4391	6.7331	202	3.369	3.427	0.0552	3.4206	3.4267	6.1898	2322
Pilot_screen_BYxRM	haploid-R2	P5	J20	YBR267W	RM	Haploid	Bad-count	3.405	3.453	0.0434	3.4432	3.4534	5.9776	196	3.404	3.462	0.0608	3.465	3.4623	6.8913	1685
Pilot_screen_BYxRM	haploid-R1	P5	J20	YBR267W	BY	Haploid	Bad-count	3.423	3.392	0.0625	3.497	3.3916	6.5848	29	3.551	3.582	0.0807	3.6314	3.5822	6.7641	539
Pilot_screen_BYxRM	haploid-R1	P5	J20	YBR267W	RM	Haploid	Bad-count	3.384	3.412	0.0326	3.4172	3.4122	5.9627	235	3.355	3.388	0.0525	3.4084	3.388	6.1538	2113
Pilot_screen_BYxRM	haploid-R2	P9	K7,K8	YBR268W	BY	Haploid	Bad-var	2.91	2.93	0.0246	2.9387	2.9305	5.1455	1242	2.933	2.927	0.0467	2.9886	2.9275	5.5444	12197
Pilot_screen_BYxRM	haploid-R2	P9	K7,K8	YBR268W	RM	Haploid	Bad-count-var	2.835	2.703	0.2254	3.1318	2.7034	6.5244	40	2.694	2.609	0.2137	3.0003	2.6095	6.4244	438
Pilot_screen_BYxRM	haploid-R1	P9	L7	YBR268W	BY	Haploid	Bad-var	3.168	3.171	0.0119	3.1828	3.1711	5.3164	1267	3.165	3.164	0.0215	3.1923	3.1636	5.6525	11941
Pilot_screen_BYxRM	haploid-R1	P9	L7	YBR268W	RM	Haploid	Bad-var	3.111	3.118	0.0172	3.1306	3.1181	5.2799	330	3.115	3.12	0.0298	3.1504	3.1199	5.6675	4000
Pilot_screen_BYxRM	haploid-R2	P9	P5,P6	YBR269C	BY	Haploid	OK	2.928	2.923	0.04	2.9762	2.9235	5.4208	1602	3.007	2.957	0.1006	3.1348	2.9572	6.2066	15643
Pilot_screen_BYxRM	haploid-R2	P9	P5,P6	YBR269C	RM	Haploid	OK	2.784	2.796	0.0259	2.8124	2.7965	4.7386	1318	2.796	2.798	0.0521	2.8561	2.7979	5.303	12713
Pilot_screen_BYxRM	haploid-R1	P9	O6	YBR269C	BY	Haploid	OK	3.114	3.1	0.0291	3.1502	3.1002	5.6751	537	3.123	3.099	0.0465	3.182	3.0995	5.9815	5163
Pilot_screen_BYxRM	haploid-R1	P9	O6	YBR269C	RM	Haploid	OK	3.005	3.006	0.0196	3.0269	3.0061	5.0799	635	3.006	3.006	0.0314	3.0427	3.0065	5.4291	6517
Pilot_screen_BYxRM	haploid-R2	P5	O02	YBR271W	BY	Haploid	OK	2.885	2.895	0.0301	2.9248	2.8954	5.573	503	2.876	2.892	0.0329	2.9115	2.8925	5.1348	5148
Pilot_screen_BYxRM	haploid-R2	P5	O02	YBR271W	RM	Haploid	OK	2.807	2.828	0.0496	2.8494	2.8285	4.9035	566	2.826	2.85	0.0447	2.8743	2.8505	5.6004	5476
Pilot_screen_BYxRM	haploid-R1	P5	O2	YBR271W	BY	Haploid	OK	2.97	2.973	0.0239	3.0043	2.9735	5.6618	662	3.035	2.996	0.0591	3.1158	2.9956	6.0906	7312
Pilot_screen_BYxRM	haploid-R1	P5	O2	YBR271W	RM	Haploid	OK	2.949	2.96	0.0212	2.9744	2.96	5.2589	575	2.956	2.96	0.0342	2.999	2.9603	5.6902	5054
Pilot_screen_BYxRM	fillin	Haploid-fillin_P1	E03	YBR271W	BY	Haploid	NA	3.049	3.033	0.0362	3.0956	3.0334	5.7	1022	3.083	3.05	0.0715	3.1684	3.0499	6.029	9477
Pilot_screen_BYxRM	fillin	Haploid-fillin_P1	E03	YBR271W	RM	Haploid	NA	2.972	2.968	0.0235	2.9999	2.9678	5.2109	834	2.947	2.947	0.0484	3.0012	2.9474	5.4884	5481
Pilot_screen_BYxRM	haploid-R2	P11	F10,F9	YBR272C	BY	Haploid	OK	2.677	2.683	0.0266	2.7073	2.6831	4.6281	1692	2.705	2.707	0.055	2.7655	2.7066	5.0346	17275
Pilot_screen_BYxRM	haploid-R2	P11	F10,F9	YBR272C	RM	Haploid	OK	2.661	2.673	0.0315	2.6941	2.6728	4.5798	1529	2.673	2.691	0.0458	2.7198	2.6914	4.7547	14516
Pilot_screen_BYxRM	haploid-R1	P11	F10	YBR272C	BY	Haploid	OK	2.981	2.985	0.0163	3.0021	2.9848	5.218	794	3.006	2.985	0.0468	3.0677	2.9851	5.7873	9089
Pilot_screen_BYxRM	haploid-R1	P11	F10	YBR272C	RM	Haploid	OK	2.955	2.959	0.0166	2.9741	2.9589	4.9684	721	2.981	2.981	0.0323	3.0194	2.9809	5.3826	6010
Pilot_screen_BYxRM	haploid-R2	P5	M24	YBR273C	BY	Haploid	OK	2.987	3.003	0.0201	3.0084	3.0028	4.9756	521	2.986	2.997	0.027	3.0163	2.9974	5.242	5631
Pilot_screen_BYxRM	haploid-R2	P5	M24	YBR273C	RM	Haploid	OK	2.934	2.958	0.0252	2.9609	2.9578	4.9744	562	2.944	2.958	0.029	2.9774	2.9583	5.4023	5029
Pilot_screen_BYxRM	haploid-R1	P5	M24	YBR273C	BY	Haploid	OK	3.032	3.036	0.0183	3.0565	3.0364	5.464	592	3.082	3.047	0.0482	3.1482	3.0469	6.003	6661
Pilot_screen_BYxRM	haploid-R1	P5	M24	YBR273C	RM	Haploid	OK	2.978	2.982	0.0198	3.0056	2.9816	5.5547	670	2.985	2.986	0.0301	3.0224	2.9857	5.6163	5826
Pilot_screen_BYxRM	fillin	Haploid-fillin_P1	E04	YBR273C	BY	Haploid	NA	3.13	3.108	0.0327	3.1723	3.108	5.7742	1035	3.148	3.099	0.0652	3.2295	3.0989	6.1436	10420
Pilot_screen_BYxRM	fillin	Haploid-fillin_P1	E04	YBR273C	RM	Haploid	NA	3.022	3.024	0.0166	3.0418	3.0236	5.0955	1171	2.988	2.989	0.0304	3.0231	2.9892	5.3147	7734
Pilot_screen_BYxRM	haploid-R2	P4	I07	YBR274W	BY	Haploid	Bad-var	2.814	2.836	0.0312	2.8458	2.8363	4.821	812	2.837	2.847	0.0353	2.8779	2.8473	5.3881	8324
Pilot_screen_BYxRM	haploid-R2	P4	I07	YBR274W	RM	Haploid	Bad-var	2.719	2.748	0.0553	2.7686	2.7477	4.8516	411	2.76	2.781	0.052	2.8328	2.7807	6.5485	3919
Pilot_screen_BYxRM	haploid-R1	P4	I7	YBR274W	BY	Haploid	Bad-var	2.881	2.866	0.0513	3.0217	2.8665	6.8167	301	2.862	2.85	0.0543	2.9631	2.8501	6.5287	3633
Pilot_screen_BYxRM	haploid-R1	P4	I7	YBR274W	RM	Haploid	Bad-var	2.797	2.804	0.021	2.8246	2.8041	5.1967	660	2.819	2.824	0.0419	2.8828	2.8243	6.081	6004
Pilot_screen_BYxRM	haploid-R2	P1	M17,M18	YBR275C	BY	Haploid	OK	2.989	3.006	0.0266	3.0178	3.0065	5.2238	1271	3.004	3.012	0.0461	3.0552	3.0125	5.6094	12529
Pilot_screen_BYxRM	haploid-R2	P1	M17,M18	YBR275C	RM	Haploid	OK	2.94	2.97	0.0474	2.9857	2.9696	5.2672	1351	2.95	2.977	0.0661	3.0133	2.977	5.4901	12678
Pilot_screen_BYxRM	haploid-R1	P1	M17	YBR275C	BY	Haploid	OK	2.861	2.865	0.0183	2.8833	2.8647	4.9785	849	2.897	2.876	0.046	2.9599	2.8765	5.6685	8276
Pilot_screen_BYxRM	haploid-R1	P1	M17	YBR275C	RM	Haploid	OK	2.838	2.857	0.0293	2.8742	2.8568	5.3122	462	2.849	2.853	0.0424	2.9002	2.8525	5.4824	4778
Pilot_screen_BYxRM	haploid-R2	P8	I19,I20	YBR278W	BY	Haploid	Bad-var	2.7	2.703	0.0313	2.7377	2.7033	4.8245	1826	2.753	2.734	0.064	2.8303	2.7338	5.482	18297
Pilot_screen_BYxRM	haploid-R2	P8	I19,I20	YBR278W	RM	Haploid	Bad-var	2.64	2.652	0.0263	2.6889	2.6521	5.6913	902	2.631	2.65	0.0427	2.6803	2.6501	5.2206	8649
Pilot_screen_BYxRM	haploid-R1	P8	J19	YBR278W	BY	Haploid	Bad-var	2.956	2.96	0.0163	2.9763	2.96	5.0686	1153	2.993	2.96	0.0533	3.0658	2.96	5.8934	11654
Pilot_screen_BYxRM	haploid-R1	P8	J19	YBR278W	RM	Haploid	Bad-var	2.937	2.937	0.022	2.9647	2.9374	5.2117	516	2.961	2.958	0.0387	3.016	2.9577	6.3324	4878
Pilot_screen_BYxRM	haploid-R2	P5	K09	YBR279W	BY	Haploid	OK	3.262	3.296	0.0265	3.2874	3.2961	5.5519	380	3.254	3.279	0.0278	3.2825	3.2791	5.6468	4098
Pilot_screen_BYxRM	haploid-R2	P5	K09	YBR279W	RM	Haploid	OK	3.249	3.28	0.0298	3.2766	3.2796	5.5506	379	3.26	3.293	0.0328	3.2937	3.2933	6.2317	3462
Pilot_screen_BYxRM	haploid-R1	P5	K9	YBR279W	BY	Haploid	OK	3.275	3.271	0.0223	3.3035	3.2711	5.8768	389	3.32	3.284	0.0553	3.388	3.2835	6.3818	4694
Pilot_screen_BYxRM	haploid-R1	P5	K9	YBR279W	RM	Haploid	OK	3.256	3.265	0.0109	3.2678	3.2651	5.255	496	3.25	3.259	0.0208	3.2718	3.2589	5.5344	4256
Pilot_screen_BYxRM	haploid-R2	P2	C11,C12	YBR281C	BY	Haploid	Bad-var	3.106	3.1	0.0604	3.2225	3.1001	6.9326	1896	3.157	3.123	0.1057	3.3165	3.1226	7.1547	18951
Pilot_screen_BYxRM	haploid-R2	P2	C11,C12	YBR281C	RM	Haploid	Bad-var	2.983	3.006	0.0369	3.02	3.0057	5.2438	1695	2.995	3.014	0.0558	3.0522	3.0142	5.6361	16221
Pilot_screen_BYxRM	haploid-R1	P2	C11	YBR281C	BY	Haploid	Bad-var	3.062	3.04	0.0347	3.1124	3.04	5.9075	572	3.102	3.055	0.0773	3.2025	3.0555	6.3395	7082
Pilot_screen_BYxRM	haploid-R1	P2	C11	YBR281C	RM	Haploid	Bad-var	2.99	2.995	0.0163	3.0097	2.9952	5.1193	1176	3.004	3.007	0.0363	3.0489	3.0069	5.7951	10290
Pilot_screen_BYxRM	haploid-R2	P9	F23,F24	YBR282W	BY	Haploid	OK	2.912	2.934	0.022	2.9354	2.9345	4.86	1009	2.933	2.936	0.0514	2.9901	2.9361	5.4529	10400
Pilot_screen_BYxRM	haploid-R2	P9	F23,F24	YBR282W	RM	Haploid	OK	2.918	2.937	0.0257	2.944	2.9366	4.913	1695	2.928	2.944	0.043	2.9716	2.9439	5.237	16387
Pilot_screen_BYxRM	haploid-R1	P9	E24	YBR282W	BY	Haploid	OK	3.107	3.113	0.0148	3.1231	3.1132	5.1196	1500	3.125	3.119	0.0313	3.1629	3.1186	5.6805	14855
Pilot_screen_BYxRM	haploid-R1	P9	E24	YBR282W	RM	Haploid	Bad-count	3.102	3.013	0.0745	3.1969	3.0132	6.1332	14	3.188	3.213	0.064	3.2558	3.2128	5.9828	263
Pilot_screen_BYxRM	fillin	Haploid-fillin_P1	E05	YBR282W	BY	Haploid	NA	3.241	3.232	0.0279	3.2758	3.2322	5.8762	1145	3.27	3.238	0.0542	3.3355	3.2376	6.2438	11432
Pilot_screen_BYxRM	fillin	Haploid-fillin_P1	E05	YBR282W	RM	Haploid	NA	3.229	3.24	0.018	3.2488	3.2397	5.4294	852	3.205	3.21	0.0314	3.2398	3.2099	5.7292	5739
Pilot_screen_BYxRM	haploid-R2	P10	N15,N16	YBR283C	BY	Haploid	OK	3.19	3.364	0.2069	3.3841	3.3638	6.5369	906	3.088	3.043	0.2376	3.3211	3.0434	6.5661	9316
Pilot_screen_BYxRM	haploid-R2	P10	N15,N16	YBR283C	RM	Haploid	OK	3.41	3.489	0.0857	3.4741	3.4886	6.1383	1212	3.393	3.492	0.1148	3.4817	3.4916	6.343	10900
Pilot_screen_BYxRM	haploid-R1	P10	N16	YBR283C	BY	Haploid	OK	3.643	3.717	0.0651	3.6968	3.7166	6.5814	765	3.609	3.682	0.0806	3.6796	3.6823	6.7372	8426
Pilot_screen_BYxRM	haploid-R1	P10	N16	YBR283C	RM	Haploid	OK	3.676	3.725	0.0456	3.7124	3.7251	6.4074	647	3.637	3.708	0.0717	3.6958	3.7079	6.6289	5504
Pilot_screen_BYxRM	haploid-R2	P3	L10	YBR286W	BY	Haploid	OK	2.759	2.779	0.0376	2.8023	2.7789	5.1813	942	2.789	2.805	0.0386	2.8312	2.8045	5.0306	9273
Pilot_screen_BYxRM	haploid-R2	P3	L10	YBR286W	RM	Haploid	OK	2.702	2.717	0.0587	2.7597	2.717	4.9516	411	2.741	2.766	0.0616	2.8026	2.7657	5.0689	4278
Pilot_screen_BYxRM	haploid-R1	P3	L10	YBR286W	BY	Haploid	OK	3.018	2.984	0.0407	3.0746	2.9841	5.7879	282	3.104	3.069	0.0778	3.1977	3.0686	6.1281	3734
Pilot_screen_BYxRM	haploid-R1	P3	L10	YBR286W	RM	Haploid	OK	2.903	2.9	0.0228	2.9335	2.9004	5.2353	676	2.9	2.9	0.0397	2.9484	2.9004	5.3971	5783
Pilot_screen_BYxRM	fillin	Haploid-fillin_P1	E06	YBR286W	BY	Haploid	NA	3.048	3.017	0.0458	3.1102	3.0165	5.8682	746	3.062	3.008	0.0826	3.163	3.0078	6.0983	7902
Pilot_screen_BYxRM	fillin	Haploid-fillin_P1	E06	YBR286W	RM	Haploid	NA	2.903	2.907	0.0165	2.9215	2.9069	4.7906	1132	2.864	2.866	0.0376	2.9074	2.866	5.2011	7498
Pilot_screen_BYxRM	haploid-R2	P10	L3,L4	YBR287W	BY	Haploid	OK	2.818	2.84	0.0371	2.8573	2.8404	4.9501	1100	2.791	2.816	0.0783	2.8701	2.8164	5.2911	10993
Pilot_screen_BYxRM	haploid-R2	P10	L3,L4	YBR287W	RM	Haploid	OK	2.907	2.919	0.033	2.943	2.9186	5.1092	1396	2.912	2.929	0.0477	2.9615	2.9286	5.2815	12463
Pilot_screen_BYxRM	haploid-R1	P10	L4	YBR287W	BY	Haploid	OK	3.17	3.178	0.0206	3.1952	3.1781	5.62	903	3.187	3.182	0.0379	3.2322	3.1816	5.9084	9239
Pilot_screen_BYxRM	haploid-R1	P10	L4	YBR287W	RM	Haploid	OK	3.226	3.239	0.0202	3.2479	3.2389	5.4642	483	3.231	3.24	0.0358	3.27	3.2404	5.8186	4469
Pilot_screen_BYxRM	fillin	Haploid-fillin_P1	E07	YBR287W	BY	Haploid	NA	3.226	3.229	0.0292	3.2605	3.2294	5.8415	1242	3.235	3.221	0.0415	3.2836	3.2213	6.0043	11687
Pilot_screen_BYxRM	fillin	Haploid-fillin_P1	E07	YBR287W	RM	Haploid	NA	3.304	3.318	0.0244	3.3297	3.3176	5.7064	1009	3.267	3.275	0.0384	3.3093	3.2748	5.9289	6051
Pilot_screen_BYxRM	haploid-R2	P11	B15,B16	YBR289W	BY	Haploid	OK	2.721	2.724	0.0311	2.7565	2.7239	4.8418	2093	2.756	2.752	0.0675	2.8323	2.7517	5.2732	20622
Pilot_screen_BYxRM	haploid-R2	P11	B15,B16	YBR289W	RM	Haploid	OK	2.61	2.626	0.0356	2.6473	2.6257	4.5301	1913	2.631	2.647	0.052	2.6844	2.6474	4.7579	18434
Pilot_screen_BYxRM	haploid-R1	P11	B16	YBR289W	BY	Haploid	OK	2.99	2.986	0.0209	3.0177	2.9865	5.435	962	3.019	2.999	0.0498	3.087	2.9992	5.9319	10444
Pilot_screen_BYxRM	haploid-R1	P11	B16	YBR289W	RM	Haploid	OK	2.948	2.95	0.0224	2.9743	2.9501	5.0878	1098	2.97	2.972	0.0409	3.0173	2.9719	5.4786	10008
Pilot_screen_BYxRM	haploid-R2	P11	M1,M2	YBR290W	BY	Haploid	Bad-count	2.78	2.758	0.0175	2.803	2.7579	4.747	12	2.973	2.957	0.0659	3.0463	2.9566	5.6624	452
Pilot_screen_BYxRM	haploid-R2	P11	M1,M2	YBR290W	RM	Haploid	Bad-count	2.753	2.781	0.0476	2.8002	2.7807	4.9302	35	2.738	2.783	0.052	2.7834	2.7826	4.783	488
Pilot_screen_BYxRM	haploid-R1	P11	M1	YBR290W	BY	Haploid	OK	3.069	3.07	0.0137	3.0885	3.0705	5.4842	749	3.102	3.07	0.041	3.1585	3.0698	5.9667	7813
Pilot_screen_BYxRM	haploid-R1	P11	M1	YBR290W	RM	Haploid	OK	3.055	3.059	0.0131	3.0705	3.0594	5.1017	519	3.066	3.071	0.0229	3.092	3.0711	5.3259	4784
Pilot_screen_BYxRM	haploid-R2	P11	J15,J16	YBR291C	BY	Haploid	OK	2.731	2.74	0.0244	2.7581	2.7404	4.6127	695	2.758	2.76	0.0559	2.82	2.7603	5.1297	7159
Pilot_screen_BYxRM	haploid-R2	P11	J15,J16	YBR291C	RM	Haploid	OK	2.736	2.738	0.0445	2.7843	2.7384	4.9201	1260	2.731	2.741	0.059	2.7936	2.7412	5.0645	11858
Pilot_screen_BYxRM	haploid-R1	P11	I16	YBR291C	BY	Haploid	OK	3.041	3.05	0.0199	3.0662	3.0503	5.4226	499	3.044	3.033	0.0381	3.0918	3.0332	5.6715	5465
Pilot_screen_BYxRM	haploid-R1	P11	I16	YBR291C	RM	Haploid	OK	3.068	3.071	0.0234	3.0944	3.0713	5.2582	439	3.079	3.086	0.0357	3.1183	3.0856	5.518	3826
Pilot_screen_BYxRM	fillin	Haploid-fillin_P1	E08	YBR291C	BY	Haploid	NA	3.135	3.14	0.0276	3.1665	3.1396	5.521	1089	3.158	3.151	0.0495	3.2158	3.1513	5.9241	8768
Pilot_screen_BYxRM	fillin	Haploid-fillin_P1	E08	YBR291C	RM	Haploid	NA	3.116	3.124	0.0354	3.1566	3.1241	5.6052	1021	3.091	3.089	0.0492	3.1465	3.0895	5.7381	6202
Pilot_screen_BYxRM	haploid-R2	P10	E11,E12	YBR296C	BY	Haploid	Bad-var	2.602	2.609	0.0358	2.6436	2.609	4.6831	2155	2.652	2.635	0.0727	2.735	2.6351	5.1396	21339
Pilot_screen_BYxRM	haploid-R2	P10	E11,E12	YBR296C	RM	Haploid	Bad-var	2.563	2.576	0.0501	2.6162	2.5763	4.6248	2122	2.586	2.607	0.0577	2.6441	2.6067	4.7216	20209
Pilot_screen_BYxRM	haploid-R1	P10	F11	YBR296C	BY	Haploid	Bad-var	2.948	2.919	0.0566	3.076	2.9195	6.6204	990	2.998	2.931	0.0958	3.1683	2.9312	6.7858	9958
Pilot_screen_BYxRM	haploid-R1	P10	F11	YBR296C	RM	Haploid	Bad-var	2.881	2.843	0.065	3.0253	2.8429	6.5467	704	2.912	2.884	0.0759	3.071	2.8841	6.821	6757
Pilot_screen_BYxRM	fillin	Haploid-fillin_P1	E09	YBR296C	BY	Haploid	NA	2.975	2.958	0.0318	3.0226	2.9578	5.9428	1785	3.003	2.959	0.0656	3.0869	2.9589	5.934	12766
Pilot_screen_BYxRM	fillin	Haploid-fillin_P1	E09	YBR296C	RM	Haploid	NA	2.911	2.905	0.0337	2.9561	2.905	5.4873	1298	2.894	2.89	0.0477	2.9533	2.8897	5.5661	7073
Pilot_screen_BYxRM	haploid-R2	P11	I15,I16	YBR302C	BY	Haploid	Bad-count	2.725	2.745	0.1091	2.8448	2.7453	5.4396	31	2.844	2.864	0.0962	2.9419	2.8642	5.5261	640
Pilot_screen_BYxRM	haploid-R2	P11	I15,I16	YBR302C	RM	Haploid	Bad-count	2.596	2.596	0.0396	2.6395	2.5962	4.5996	101	2.564	2.579	0.07	2.633	2.5793	4.7549	790
Pilot_screen_BYxRM	haploid-R1	P11	I15	YBR302C	BY	Haploid	OK	2.909	2.91	0.0161	2.9291	2.9099	4.965	526	2.947	2.916	0.0482	3.0143	2.916	5.7707	5350
Pilot_screen_BYxRM	haploid-R1	P11	I15	YBR302C	RM	Haploid	Bad-count	2.905	2.903	0.0241	2.9341	2.9027	5.1075	242	2.925	2.925	0.0343	2.9643	2.9251	5.2842	2319
Pilot_screen_BYxRM	haploid-R2	P11	I10,I9	YCL001W	BY	Haploid	OK	2.872	2.839	0.0538	2.9446	2.839	5.6685	1737	2.877	2.847	0.0716	2.9657	2.8466	5.7478	17424
Pilot_screen_BYxRM	haploid-R2	P11	I10,I9	YCL001W	RM	Haploid	OK	2.758	2.759	0.0244	2.7872	2.7595	4.9244	1309	2.762	2.771	0.0441	2.8153	2.7711	5.3809	12483
Pilot_screen_BYxRM	haploid-R1	P11	J9	YCL001W	BY	Haploid	OK	3.085	3.087	0.0139	3.1012	3.0866	5.1402	848	3.098	3.084	0.0353	3.1432	3.084	5.7848	8800
Pilot_screen_BYxRM	haploid-R1	P11	J9	YCL001W	RM	Haploid	OK	3.028	3.038	0.0178	3.0503	3.0382	5.3132	457	3.048	3.049	0.0313	3.0856	3.0491	5.5441	4153
Pilot_screen_BYxRM	fillin	Haploid-fillin_P1	E10	YCL001W	BY	Haploid	NA	3.158	3.143	0.0265	3.1903	3.1432	5.6872	1252	3.166	3.142	0.0477	3.2235	3.1419	5.9606	10640
Pilot_screen_BYxRM	fillin	Haploid-fillin_P1	E10	YCL001W	RM	Haploid	NA	3.125	3.125	0.0191	3.1466	3.125	5.3021	1252	3.09	3.092	0.0353	3.1307	3.0917	5.5662	8186
Pilot_screen_BYxRM	haploid-R2	P7	K1,K2	YCL005W	BY	Haploid	OK	2.596	2.611	0.0319	2.6355	2.6108	4.8615	1472	2.62	2.621	0.0512	2.6892	2.6215	5.4793	14519
Pilot_screen_BYxRM	haploid-R2	P7	K1,K2	YCL005W	RM	Haploid	OK	2.593	2.634	0.0764	2.6655	2.634	5.0558	1028	2.622	2.671	0.0864	2.7	2.6715	4.9756	10112
Pilot_screen_BYxRM	haploid-R1	P7	L1	YCL005W	BY	Haploid	OK	2.896	2.899	0.0185	2.9199	2.8992	5.0748	474	2.941	2.914	0.0494	3.0093	2.9144	5.769	4851
Pilot_screen_BYxRM	haploid-R1	P7	L1	YCL005W	RM	Haploid	OK	2.884	2.892	0.018	2.9059	2.8925	4.9731	303	2.887	2.891	0.0335	2.9287	2.8909	5.341	2885
Pilot_screen_BYxRM	haploid-R2	P6	H02	YCL009C	BY	Haploid	OK	3.675	3.695	0.0245	3.6972	3.695	6.2927	672	3.684	3.695	0.0379	3.7225	3.695	6.702	7408
Pilot_screen_BYxRM	haploid-R2	P6	H02	YCL009C	RM	Haploid	OK	3.656	3.67	0.0295	3.6894	3.6701	6.8474	829	3.664	3.683	0.0358	3.6993	3.683	6.6057	7391
Pilot_screen_BYxRM	haploid-R1	P6	H2	YCL009C	BY	Haploid	OK	3.646	3.666	0.0187	3.6639	3.6659	6.1565	1172	3.639	3.651	0.0323	3.6708	3.6511	6.4768	11701
Pilot_screen_BYxRM	haploid-R1	P6	H2	YCL009C	RM	Haploid	OK	3.638	3.675	0.0412	3.673	3.6751	6.3681	610	3.63	3.675	0.0605	3.6852	3.675	7.1706	6122
Pilot_screen_BYxRM	haploid-R2	P7	I5,I6	YCL010C	BY	Haploid	OK	2.837	2.846	0.0133	2.851	2.8462	4.4634	1601	2.847	2.854	0.0238	2.8725	2.8538	4.8079	15730
Pilot_screen_BYxRM	haploid-R2	P7	I5,I6	YCL010C	RM	Haploid	OK	2.815	2.843	0.0375	2.8476	2.843	4.758	1321	2.814	2.846	0.0439	2.8555	2.8456	4.9021	12781
Pilot_screen_BYxRM	haploid-R1	P7	J5	YCL010C	BY	Haploid	OK	3.084	3.08	0.0118	3.0988	3.0801	5.1906	476	3.08	3.07	0.0264	3.1145	3.0701	5.6409	4600
Pilot_screen_BYxRM	haploid-R1	P7	J5	YCL010C	RM	Haploid	Bad-count	3.049	3.055	0.01	3.0601	3.0547	4.8057	231	3.081	3.092	0.021	3.1138	3.0916	6.4567	2446
Pilot_screen_BYxRM	haploid-R2	P5	M12	YCL011C	BY	Haploid	OK	3.02	3.035	0.0234	3.0447	3.0353	5.1351	661	3.018	3.033	0.0246	3.0442	3.0332	5.1556	6683
Pilot_screen_BYxRM	haploid-R2	P5	M12	YCL011C	RM	Haploid	OK	3.013	3.027	0.0222	3.037	3.027	5.1	515	3.021	3.034	0.0271	3.0495	3.0341	5.2225	5054
Pilot_screen_BYxRM	haploid-R1	P5	M12	YCL011C	BY	Haploid	OK	3.083	3.085	0.0215	3.1127	3.0846	5.6762	459	3.126	3.094	0.0484	3.1901	3.0939	6.0569	5633
Pilot_screen_BYxRM	haploid-R1	P5	M12	YCL011C	RM	Haploid	OK	3.03	3.033	0.0127	3.0448	3.0335	4.9365	1014	3.029	3.033	0.0249	3.0579	3.0335	5.279	8968
Pilot_screen_BYxRM	fillin	Haploid-fillin_P1	E11	YCL011C	BY	Haploid	NA	3.139	3.129	0.0199	3.164	3.1295	5.5406	1554	3.138	3.108	0.0445	3.1932	3.1077	5.9135	12780
Pilot_screen_BYxRM	fillin	Haploid-fillin_P1	E11	YCL011C	RM	Haploid	NA	3.084	3.08	0.0138	3.0999	3.0795	5.1116	1101	3.058	3.061	0.0287	3.0909	3.0613	5.3925	6768
Pilot_screen_BYxRM	haploid-R2	P1	A13,A14	YCL014W	BY	Haploid	OK	3.099	3.106	0.0219	3.1249	3.1061	5.4597	1835	3.132	3.125	0.04	3.18	3.1253	5.8349	18114
Pilot_screen_BYxRM	haploid-R2	P1	A13,A14	YCL014W	RM	Haploid	OK	3.076	3.08	0.0265	3.107	3.0803	5.6054	1817	3.082	3.087	0.0385	3.1251	3.0871	5.6737	17723
Pilot_screen_BYxRM	haploid-R1	P1	A13	YCL014W	BY	Haploid	OK	3.064	3.059	0.0155	3.0863	3.0588	5.4994	882	3.091	3.073	0.0321	3.1342	3.0729	5.8062	10109
Pilot_screen_BYxRM	haploid-R1	P1	A13	YCL014W	RM	Haploid	OK	3.028	3.031	0.0127	3.0426	3.0309	4.9183	1358	3.044	3.043	0.0227	3.0701	3.0434	5.3483	12264
Pilot_screen_BYxRM	haploid-R2	P5	D04	YCL016C	BY	Haploid	OK	2.95	2.966	0.0222	2.9735	2.9659	4.9471	478	2.954	2.969	0.0304	2.9906	2.969	5.6236	4810
Pilot_screen_BYxRM	haploid-R2	P5	D04	YCL016C	RM	Haploid	OK	2.898	2.907	0.0336	2.942	2.9072	5.6061	356	2.921	2.931	0.0335	2.9612	2.9314	5.4448	3457
Pilot_screen_BYxRM	haploid-R1	P5	D4	YCL016C	BY	Haploid	OK	2.987	2.986	0.024	3.0193	2.9862	5.4651	773	3.045	3.01	0.0567	3.1171	3.0104	5.9331	9751
Pilot_screen_BYxRM	haploid-R1	P5	D4	YCL016C	RM	Haploid	OK	2.929	2.935	0.0174	2.9489	2.9348	4.9722	1106	2.944	2.94	0.0321	2.9832	2.9404	5.4542	9010
Pilot_screen_BYxRM	fillin	Haploid-fillin_P1	E12	YCL016C	BY	Haploid	NA	3.066	3.047	0.0313	3.1073	3.0475	5.666	1141	3.109	3.068	0.0634	3.1864	3.0679	6.0386	10177
Pilot_screen_BYxRM	fillin	Haploid-fillin_P1	E12	YCL016C	RM	Haploid	NA	2.986	2.985	0.0176	3.0072	2.9851	5.1113	1313	2.967	2.968	0.0342	3.0064	2.9681	5.3516	8202
Pilot_screen_BYxRM	haploid-R2	P4	D21	YCL017C	BY	Haploid	OK	3.447	3.472	0.0325	3.4778	3.4725	6.0366	1140	3.448	3.464	0.0323	3.4821	3.4645	6.4247	11589
Pilot_screen_BYxRM	haploid-R2	P4	D21	YCL017C	RM	Haploid	OK	3.43	3.452	0.0307	3.4601	3.4519	5.9761	626	3.427	3.463	0.0518	3.4764	3.4634	6.4026	5714
Pilot_screen_BYxRM	haploid-R1	P4	D21	YCL017C	BY	Haploid	OK	3.443	3.457	0.0285	3.4732	3.4574	6.1294	547	3.453	3.455	0.0516	3.515	3.4549	6.7393	6112
Pilot_screen_BYxRM	haploid-R1	P4	D21	YCL017C	RM	Haploid	OK	3.425	3.448	0.0241	3.4486	3.4482	5.8276	656	3.423	3.445	0.0406	3.4648	3.4448	6.2044	5971
Pilot_screen_BYxRM	haploid-R2	P1	A3,A4	YCL024W	BY	Haploid	OK	2.99	2.996	0.0183	3.0125	2.9958	5.2258	1702	3.031	3.004	0.0528	3.1015	3.0044	5.9401	16943
Pilot_screen_BYxRM	haploid-R2	P1	A3,A4	YCL024W	RM	Haploid	OK	2.944	2.955	0.0227	2.9701	2.9552	5.1149	2525	2.95	2.959	0.0401	2.995	2.9586	5.3595	24415
Pilot_screen_BYxRM	haploid-R1	P1	B3	YCL024W	BY	Haploid	OK	2.924	2.924	0.0184	2.9479	2.924	5.0983	1213	2.954	2.93	0.0499	3.0222	2.9302	5.8107	13299
Pilot_screen_BYxRM	haploid-R1	P1	B3	YCL024W	RM	Haploid	OK	2.875	2.881	0.0207	2.9009	2.8812	5.0726	1225	2.903	2.905	0.0346	2.9442	2.9047	5.3233	11038
Pilot_screen_BYxRM	haploid-R2	P10	A15,A16	YCL025C	BY	Haploid	OK	3.873	3.966	0.1296	3.9493	3.9661	7.0374	1571	3.85	3.943	0.1411	3.9431	3.9433	7.2373	16117
Pilot_screen_BYxRM	haploid-R2	P10	A15,A16	YCL025C	RM	Haploid	OK	3.745	3.937	0.2527	3.9061	3.9366	7.2686	1489	3.744	3.933	0.2825	3.9254	3.9333	7.4163	14323
Pilot_screen_BYxRM	haploid-R1	P10	B15	YCL025C	BY	Haploid	OK	4.061	4.107	0.0607	4.1032	4.1072	7.2052	1239	4.048	4.095	0.0792	4.1077	4.0951	7.4645	12906
Pilot_screen_BYxRM	haploid-R1	P10	B15	YCL025C	RM	Haploid	OK	4.085	4.143	0.0846	4.1438	4.1434	7.4436	1059	4.089	4.154	0.1119	4.1703	4.1545	7.6968	9299
Pilot_screen_BYxRM	haploid-R2	P8	E5,E6	YCL026C-A	BY	Haploid	OK	2.61	2.6	0.0432	2.6648	2.5998	4.9774	2091	2.651	2.631	0.0827	2.7478	2.6309	5.3054	20745
Pilot_screen_BYxRM	haploid-R2	P8	E5,E6	YCL026C-A	RM	Haploid	OK	2.513	2.534	0.04	2.5534	2.5338	4.3475	788	2.507	2.528	0.0595	2.5729	2.5285	5.0069	7439
Pilot_screen_BYxRM	haploid-R1	P8	F5	YCL026C-A	BY	Haploid	OK	2.856	2.851	0.0233	2.8959	2.8513	5.798	990	2.88	2.856	0.0562	2.9617	2.8556	5.9289	10372
Pilot_screen_BYxRM	haploid-R1	P8	F5	YCL026C-A	RM	Haploid	OK	2.817	2.821	0.0239	2.8462	2.8213	4.9415	615	2.862	2.853	0.0447	2.9271	2.8525	6.1048	5571
Pilot_screen_BYxRM	haploid-R2	P8	C5,C6	YCL027C-A	BY	Haploid	OK	2.674	2.683	0.0321	2.7086	2.6835	4.633	2065	2.715	2.711	0.0625	2.786	2.7111	5.1778	20631
Pilot_screen_BYxRM	haploid-R2	P8	C5,C6	YCL027C-A	RM	Haploid	OK	2.609	2.618	0.0401	2.6549	2.6183	4.8117	1673	2.619	2.631	0.0589	2.6843	2.6309	5.012	16047
Pilot_screen_BYxRM	haploid-R1	P8	D5	YCL027C-A	BY	Haploid	OK	2.886	2.882	0.0218	2.9128	2.8823	5.091	1388	2.91	2.894	0.0529	2.9784	2.8937	5.6777	14339
Pilot_screen_BYxRM	haploid-R1	P8	D5	YCL027C-A	RM	Haploid	OK	2.86	2.861	0.0298	2.8944	2.8611	5.0934	931	2.894	2.892	0.0489	2.9513	2.892	5.5089	8671
Pilot_screen_BYxRM	haploid-R2	P10	B23,B24	YCL027W	BY	Haploid	OK	2.577	2.595	0.0381	2.6186	2.5953	4.568	2163	2.614	2.617	0.0699	2.691	2.6167	5.0099	21422
Pilot_screen_BYxRM	haploid-R2	P10	B23,B24	YCL027W	RM	Haploid	OK	2.486	2.504	0.0411	2.5271	2.5041	4.3187	595	2.49	2.517	0.0605	2.5511	2.5168	4.54	5797
Pilot_screen_BYxRM	haploid-R1	P10	B24	YCL027W	BY	Haploid	OK	2.888	2.893	0.0283	2.9322	2.8934	5.7288	1064	2.912	2.892	0.0606	2.9944	2.8925	5.8786	10750
Pilot_screen_BYxRM	haploid-R1	P10	B24	YCL027W	RM	Haploid	OK	2.825	2.838	0.0295	2.8597	2.8382	5.0622	1199	2.853	2.858	0.049	2.9086	2.8581	5.3577	11533
Pilot_screen_BYxRM	haploid-R2	P5	L11	YCL028W	BY	Haploid	OK	3.318	3.336	0.0335	3.353	3.3359	5.8696	309	3.317	3.339	0.0453	3.3649	3.3387	6.1048	3222
Pilot_screen_BYxRM	haploid-R2	P5	L11	YCL028W	RM	Haploid	OK	3.262	3.283	0.0385	3.2995	3.2831	5.7725	278	3.263	3.283	0.0478	3.3107	3.2826	5.9466	2576
Pilot_screen_BYxRM	haploid-R1	P5	L11	YCL028W	BY	Haploid	OK	3.349	3.353	0.0312	3.3854	3.3534	6.0966	482	3.41	3.38	0.0705	3.4925	3.3798	6.6368	6227
Pilot_screen_BYxRM	haploid-R1	P5	L11	YCL028W	RM	Haploid	OK	3.263	3.264	0.0139	3.278	3.2636	5.3993	970	3.255	3.256	0.0272	3.2861	3.2565	5.8136	8220
Pilot_screen_BYxRM	haploid-R2	P5	A05	YCL029C	BY	Haploid	Bad-var	2.925	2.94	0.0329	2.9606	2.9402	5.137	456	2.958	2.969	0.0409	3.0033	2.9693	5.3809	4890
Pilot_screen_BYxRM	haploid-R2	P5	A05	YCL029C	RM	Haploid	Bad-var	2.837	2.859	0.0453	2.8843	2.8592	5.0831	786	2.889	2.913	0.0473	2.9418	2.9127	5.9964	7461
Pilot_screen_BYxRM	haploid-R1	P5	A5	YCL029C	BY	Haploid	Bad-var	2.985	2.973	0.038	3.0698	2.9733	6.6114	825	3.046	2.998	0.0848	3.2216	2.998	7.1351	9102
Pilot_screen_BYxRM	haploid-R1	P5	A5	YCL029C	RM	Haploid	Bad-var	2.915	2.92	0.0211	2.9466	2.9198	5.808	1658	2.928	2.93	0.0377	2.9792	2.9302	6.0183	15363
Pilot_screen_BYxRM	haploid-R2	P2	N5,N6	YCL030C	BY	Haploid	OK	4.332	4.443	0.1537	4.437	4.4432	8.273	1749	4.293	4.4	0.1737	4.4148	4.4001	8.3416	17493
Pilot_screen_BYxRM	haploid-R2	P2	N5,N6	YCL030C	RM	Haploid	OK	4.349	4.397	0.0717	4.4013	4.3966	7.9683	1192	4.33	4.389	0.1049	4.4057	4.3894	8.1661	11295
Pilot_screen_BYxRM	haploid-R1	P2	M6	YCL030C	BY	Haploid	OK	4.137	4.278	0.1932	4.2907	4.2778	8.2125	268	4.038	4.167	0.235	4.2271	4.1673	8.2193	3420
Pilot_screen_BYxRM	haploid-R1	P2	M6	YCL030C	RM	Haploid	OK	4.328	4.425	0.1146	4.4041	4.4253	8.0183	569	4.274	4.398	0.1743	4.3942	4.3978	8.2572	4933
Pilot_screen_BYxRM	haploid-R2	P7	G10,G9	YCL031C	BY	Haploid	OK	3.11	3.127	0.0206	3.1277	3.1272	5.0204	1453	3.102	3.12	0.0302	3.1316	3.1196	5.3504	14336
Pilot_screen_BYxRM	haploid-R2	P7	G10,G9	YCL031C	RM	Haploid	OK	3.141	3.177	0.0348	3.1677	3.1765	5.194	893	3.112	3.158	0.0524	3.1565	3.1578	5.4622	8639
Pilot_screen_BYxRM	haploid-R1	P7	G9	YCL031C	BY	Haploid	OK	3.315	3.354	0.024	3.3379	3.3537	5.5744	304	3.314	3.33	0.0354	3.3513	3.3303	5.9324	3157
Pilot_screen_BYxRM	haploid-R1	P7	G9	YCL031C	RM	Haploid	Bad-count	3.3	3.361	0.0434	3.3382	3.3613	5.7287	81	3.343	3.367	0.0327	3.376	3.3666	5.9379	716
Pilot_screen_BYxRM	haploid-R2	P6	E08	YCL032W	BY	Haploid	OK	2.961	2.978	0.031	2.9975	2.9785	5.3729	399	3.027	3.024	0.0379	3.0732	3.0244	5.8632	5162
Pilot_screen_BYxRM	haploid-R2	P6	E08	YCL032W	RM	Haploid	OK	2.884	2.905	0.0329	2.9176	2.9055	5.0039	837	2.909	2.923	0.0372	2.948	2.9232	5.177	6896
Pilot_screen_BYxRM	haploid-R1	P6	E8	YCL032W	BY	Haploid	OK	2.952	2.954	0.0145	2.9706	2.954	5.0835	828	2.942	2.94	0.0284	2.978	2.9399	5.3925	7890
Pilot_screen_BYxRM	haploid-R1	P6	E8	YCL032W	RM	Haploid	OK	2.898	2.903	0.0174	2.9207	2.9028	5.0763	544	2.943	2.952	0.029	2.975	2.9523	5.2138	5836
Pilot_screen_BYxRM	fillin	Haploid-fillin_P1	E13	YCL032W	BY	Haploid	NA	3.08	3.064	0.0249	3.1118	3.0644	5.5508	966	3.123	3.072	0.0623	3.2013	3.072	6.0952	8801
Pilot_screen_BYxRM	fillin	Haploid-fillin_P1	E13	YCL032W	RM	Haploid	NA	2.995	3.003	0.0164	3.015	3.0034	5.0913	784	2.979	2.972	0.0306	3.0154	2.9724	5.3751	4683
Pilot_screen_BYxRM	haploid-R2	P6	A20	YCL034W	BY	Haploid	OK	3.034	3.044	0.0268	3.0631	3.0439	5.2598	502	3.088	3.085	0.0371	3.1308	3.0851	5.6098	5249
Pilot_screen_BYxRM	haploid-R2	P6	A20	YCL034W	RM	Haploid	OK	2.946	2.963	0.0375	2.9829	2.9632	5.1723	1013	2.963	2.974	0.0381	3.0045	2.9738	5.3467	9886
Pilot_screen_BYxRM	haploid-R1	P6	A20	YCL034W	BY	Haploid	OK	3.012	3.012	0.0186	3.0362	3.0125	5.3282	1035	3.027	3.018	0.0342	3.0725	3.0185	5.7824	10584
Pilot_screen_BYxRM	haploid-R1	P6	A20	YCL034W	RM	Haploid	OK	2.986	2.992	0.0179	3.0058	2.9925	4.9866	783	3.004	3.009	0.0284	3.0353	3.0095	5.2567	7388
Pilot_screen_BYxRM	fillin	Haploid-fillin_P1	E14	YCL034W	BY	Haploid	NA	3.149	3.138	0.0255	3.1815	3.138	5.7068	1347	3.177	3.135	0.058	3.2502	3.1348	6.1452	10768
Pilot_screen_BYxRM	fillin	Haploid-fillin_P1	E14	YCL034W	RM	Haploid	NA	3.072	3.07	0.0167	3.0915	3.0698	5.1682	1243	3.046	3.042	0.0304	3.0817	3.0418	5.4317	7809
Pilot_screen_BYxRM	haploid-R2	P9	E13,E14	YCL035C	BY	Haploid	OK	3.351	3.398	0.0587	3.4004	3.398	5.9936	2095	3.377	3.399	0.0834	3.4586	3.3991	6.5144	20725
Pilot_screen_BYxRM	haploid-R2	P9	E13,E14	YCL035C	RM	Haploid	OK	3.267	3.289	0.0423	3.3081	3.2893	5.8392	1615	3.274	3.29	0.0676	3.3407	3.2902	6.1987	15961
Pilot_screen_BYxRM	haploid-R1	P9	F13	YCL035C	BY	Haploid	OK	3.478	3.484	0.0396	3.5184	3.4845	6.2725	977	3.471	3.467	0.0597	3.5382	3.4668	6.6533	10220
Pilot_screen_BYxRM	haploid-R1	P9	F13	YCL035C	RM	Haploid	OK	3.38	3.387	0.0352	3.4163	3.3873	6.0158	776	3.393	3.398	0.0499	3.4489	3.3977	6.4205	7234
Pilot_screen_BYxRM	haploid-R2	P4	B14	YCL037C	BY	Haploid	OK	3.886	3.945	0.0749	3.941	3.9449	7.0504	617	3.871	3.934	0.0787	3.9327	3.9341	7.1248	6152
Pilot_screen_BYxRM	haploid-R2	P4	B14	YCL037C	RM	Haploid	OK	3.931	3.966	0.0693	3.979	3.9662	7.0948	628	3.936	3.979	0.0754	3.991	3.9795	7.1855	6184
Pilot_screen_BYxRM	haploid-R1	P4	B14	YCL037C	BY	Haploid	OK	3.806	3.888	0.075	3.8648	3.8883	6.9147	770	3.774	3.838	0.0908	3.8547	3.838	7.3172	8262
Pilot_screen_BYxRM	haploid-R1	P4	B14	YCL037C	RM	Haploid	OK	3.946	3.992	0.0579	3.9856	3.9917	6.9252	1068	3.936	3.974	0.0693	3.9916	3.9741	7.232	10127
Pilot_screen_BYxRM	fillin	Haploid-fillin_P1	E15	YCL037C	BY	Haploid	NA	3.903	3.997	0.0906	3.9761	3.9968	7.236	1500	3.833	3.889	0.0796	3.9056	3.8895	7.234	12957
Pilot_screen_BYxRM	fillin	Haploid-fillin_P1	E15	YCL037C	RM	Haploid	NA	4.015	4.042	0.0416	4.047	4.0422	7.0418	1006	3.965	4.005	0.0693	4.0215	4.0054	7.2997	6048
Pilot_screen_BYxRM	haploid-R2	P2	A5,A6	YCL039W	BY	Haploid	OK	3.073	3.067	0.0213	3.1017	3.0673	5.6063	1743	3.156	3.091	0.0744	3.2534	3.0914	6.3069	17154
Pilot_screen_BYxRM	haploid-R2	P2	A5,A6	YCL039W	RM	Haploid	OK	2.983	2.992	0.0155	3.0005	2.9916	4.8887	2410	2.985	2.989	0.0362	3.0258	2.9893	5.3629	23552
Pilot_screen_BYxRM	haploid-R1	P2	B5	YCL039W	BY	Haploid	OK	3.096	3.046	0.0484	3.1646	3.0456	6.0842	552	3.151	3.098	0.0815	3.2506	3.0985	6.2867	6722
Pilot_screen_BYxRM	haploid-R1	P2	B5	YCL039W	RM	Haploid	OK	2.969	2.971	0.0152	2.9886	2.971	5.2092	1379	2.988	2.983	0.0337	3.0284	2.9834	5.4437	12603
Pilot_screen_BYxRM	haploid-R2	P4	A02	YCL040W	BY	Haploid	OK	3.365	3.347	0.0393	3.4118	3.3475	6.2492	338	3.4	3.383	0.052	3.4634	3.383	6.6899	3565
Pilot_screen_BYxRM	haploid-R2	P4	A02	YCL040W	RM	Haploid	OK	3.239	3.227	0.038	3.2846	3.2266	5.9885	829	3.264	3.251	0.045	3.3181	3.2506	6.1596	8404
Pilot_screen_BYxRM	haploid-R1	P4	A2	YCL040W	BY	Haploid	OK	3.34	3.332	0.0292	3.3736	3.332	6.0128	1574	3.355	3.333	0.0527	3.4186	3.3333	6.3988	16918
Pilot_screen_BYxRM	haploid-R1	P4	A2	YCL040W	RM	Haploid	OK	3.256	3.253	0.0202	3.2798	3.2529	5.6604	1242	3.281	3.267	0.0411	3.3312	3.267	6.1433	11129
Pilot_screen_BYxRM	fillin	Haploid-fillin_P1	E16	YCL040W	BY	Haploid	NA	3.489	3.469	0.0463	3.5435	3.4685	6.5668	1164	3.491	3.444	0.0797	3.5876	3.4436	6.9252	10362
Pilot_screen_BYxRM	fillin	Haploid-fillin_P1	E16	YCL040W	RM	Haploid	NA	3.344	3.337	0.0319	3.3828	3.337	6.162	1130	3.305	3.288	0.0514	3.369	3.2882	6.4175	7747
Pilot_screen_BYxRM	haploid-R2	P4	M24	YCL043C	BY	Haploid	Bad-count-var	3.281	3.257	0.0526	3.3484	3.257	6.3036	10	3.209	3.21	0.0534	3.2711	3.2096	6.0554	76
Pilot_screen_BYxRM	haploid-R2	P4	M24	YCL043C	RM	Haploid	Bad-count-var	3.2	3.129	0.1358	3.3916	3.1319	6.9594	10	3.172	3.161	0.1431	3.4705	3.1615	7.9359	137
Pilot_screen_BYxRM	haploid-R1	P4	M24	YCL043C	BY	Haploid	Bad-count-var	3.129	3.125	0.0436	3.1786	3.1257	5.7199	18	3.158	3.151	0.0536	3.2249	3.1514	6.0842	267
Pilot_screen_BYxRM	haploid-R1	P4	M24	YCL043C	RM	Haploid	Bad-count-var	3.11	3.161	0.0456	3.1596	3.1615	5.6741	19	3.157	3.154	0.061	3.2281	3.1536	6.0374	123
Pilot_screen_BYxRM	haploid-R2	P5	G02	YCL044C	BY	Haploid	Bad-var	3.005	2.972	0.0825	3.4528	2.9719	8.618	412	3.023	2.979	0.1183	3.5897	2.979	8.7852	4332
Pilot_screen_BYxRM	haploid-R2	P5	G02	YCL044C	RM	Haploid	Bad-var	2.929	2.904	0.0881	3.1944	2.9036	8.0678	716	2.934	2.915	0.0871	3.2639	2.9149	8.2824	6716
Pilot_screen_BYxRM	haploid-R1	P5	G2	YCL044C	BY	Haploid	Bad-var	3.025	3.003	0.0413	3.1554	3.0026	7.6454	643	3.117	3.045	0.1378	3.6009	3.045	8.6832	7563
Pilot_screen_BYxRM	haploid-R1	P5	G2	YCL044C	RM	Haploid	Bad-var	2.972	2.95	0.0641	3.3565	2.9498	8.4832	1114	2.97	2.95	0.0804	3.3557	2.9498	8.4527	9923
Pilot_screen_BYxRM	fillin	Haploid-fillin_P1	E17	YCL044C	BY	Haploid	NA	3.071	3.051	0.0264	3.1063	3.0515	5.6491	1353	3.108	3.056	0.0659	3.1927	3.0562	6.1319	10629
Pilot_screen_BYxRM	fillin	Haploid-fillin_P1	E17	YCL044C	RM	Haploid	NA	2.986	2.987	0.0193	3.0093	2.9871	5.131	1182	2.969	2.967	0.0363	3.0117	2.9666	5.384	7204
Pilot_screen_BYxRM	haploid-R2	P10	J13,J14	YCL045C	BY	Haploid	OK	3.12	3.191	0.051	3.1657	3.1912	5.4773	661	3.106	3.168	0.0769	3.1735	3.1683	5.7026	6735
Pilot_screen_BYxRM	haploid-R2	P10	J13,J14	YCL045C	RM	Haploid	OK	3.101	3.137	0.0356	3.1309	3.1371	5.2033	1659	3.069	3.119	0.0646	3.1244	3.1188	5.5173	15520
Pilot_screen_BYxRM	haploid-R1	P10	I14	YCL045C	BY	Haploid	OK	3.335	3.361	0.0272	3.3613	3.3607	5.7486	813	3.357	3.361	0.0442	3.408	3.3609	6.3744	8424
Pilot_screen_BYxRM	haploid-R1	P10	I14	YCL045C	RM	Haploid	OK	3.334	3.345	0.015	3.3489	3.3449	5.4706	542	3.338	3.348	0.0345	3.3822	3.3477	6.5723	4805
Pilot_screen_BYxRM	fillin	Haploid-fillin_P1	E18	YCL045C	BY	Haploid	NA	3.406	3.429	0.031	3.4378	3.4292	6.0358	821	3.408	3.403	0.0445	3.4571	3.4029	6.3105	8771
Pilot_screen_BYxRM	fillin	Haploid-fillin_P1	E18	YCL045C	RM	Haploid	NA	3.365	3.371	0.016	3.3814	3.3711	5.6017	944	3.318	3.329	0.0309	3.3502	3.3295	5.8614	6711
Pilot_screen_BYxRM	haploid-R2	P6	N20	YCL050C	BY	Haploid	OK	3.666	3.71	0.0469	3.7066	3.7102	6.5366	644	3.667	3.703	0.0522	3.7159	3.7034	6.9911	6938
Pilot_screen_BYxRM	haploid-R2	P6	N20	YCL050C	RM	Haploid	OK	3.574	3.603	0.0606	3.6282	3.6034	6.5359	362	3.585	3.634	0.0692	3.6459	3.6337	6.6272	3099
Pilot_screen_BYxRM	haploid-R1	P6	N20	YCL050C	BY	Haploid	OK	3.491	3.513	0.0269	3.5168	3.5125	6.0418	882	3.476	3.499	0.0444	3.5199	3.4986	6.3183	8815
Pilot_screen_BYxRM	haploid-R1	P6	N20	YCL050C	RM	Haploid	OK	3.428	3.454	0.0333	3.4591	3.454	5.9603	394	3.424	3.459	0.0503	3.4718	3.4589	6.1989	3907
Pilot_screen_BYxRM	haploid-R2	P10	J1,J2	YCL052C	BY	Haploid	OK	2.732	2.745	0.0273	2.7633	2.7455	4.7863	696	2.729	2.737	0.068	2.8062	2.7372	5.2984	7086
Pilot_screen_BYxRM	haploid-R2	P10	J1,J2	YCL052C	RM	Haploid	OK	2.754	2.767	0.0289	2.7849	2.7671	4.7245	1215	2.774	2.788	0.0414	2.8181	2.7876	4.9959	11217
Pilot_screen_BYxRM	haploid-R1	P10	J2	YCL052C	BY	Haploid	OK	3.061	3.053	0.0199	3.0892	3.0532	5.5601	871	3.081	3.052	0.0452	3.1429	3.052	5.9786	8741
Pilot_screen_BYxRM	haploid-R1	P10	J2	YCL052C	RM	Haploid	OK	3.024	3.031	0.0175	3.0467	3.0309	5.2894	547	3.045	3.04	0.0317	3.0838	3.0402	5.587	5283
Pilot_screen_BYxRM	fillin	Haploid-fillin_P1	E19	YCL052C	BY	Haploid	NA	3.13	3.118	0.0203	3.1557	3.118	5.532	1361	3.151	3.112	0.0517	3.2164	3.1119	6.0366	10487
Pilot_screen_BYxRM	fillin	Haploid-fillin_P1	E19	YCL052C	RM	Haploid	NA	3.049	3.049	0.0129	3.0638	3.0489	4.9978	1154	3.022	3.019	0.0285	3.0554	3.0189	5.3677	7090
Pilot_screen_BYxRM	haploid-R2	P6	P13	YCL055W	BY	Haploid	OK	3.108	3.121	0.0294	3.1398	3.1206	5.4588	460	3.128	3.138	0.0305	3.1615	3.1377	5.6982	5709
Pilot_screen_BYxRM	haploid-R2	P6	P13	YCL055W	RM	Haploid	OK	3.037	3.039	0.0415	3.0735	3.0394	5.3493	444	3.075	3.086	0.041	3.1235	3.0859	6.1133	3251
Pilot_screen_BYxRM	haploid-R1	P6	P13	YCL055W	BY	Haploid	OK	3.04	3.048	0.0132	3.0548	3.0477	4.9569	947	3.047	3.047	0.025	3.0834	3.0473	6.2851	8981
Pilot_screen_BYxRM	haploid-R1	P6	P13	YCL055W	RM	Haploid	OK	3.047	3.058	0.0186	3.069	3.0576	5.206	374	3.047	3.05	0.0295	3.0825	3.0505	5.5704	4211
Pilot_screen_BYxRM	haploid-R2	P9	J19,J20	YCL056C	BY	Haploid	OK	2.573	2.591	0.0289	2.6038	2.5906	4.3572	1946	2.61	2.61	0.0612	2.6775	2.61	4.9136	19390
Pilot_screen_BYxRM	haploid-R2	P9	J19,J20	YCL056C	RM	Haploid	OK	2.504	2.526	0.0416	2.546	2.5263	4.312	1475	2.517	2.542	0.0593	2.5759	2.5423	4.5654	14264
Pilot_screen_BYxRM	haploid-R1	P9	I20	YCL056C	BY	Haploid	OK	2.874	2.878	0.0186	2.8969	2.8783	5.0035	1722	2.884	2.879	0.0353	2.929	2.8794	5.4158	16981
Pilot_screen_BYxRM	haploid-R1	P9	I20	YCL056C	RM	Haploid	Bad-count	2.984	2.977	0.0268	3.0248	2.9775	5.5917	17	3.05	3.019	0.0707	3.1375	3.0195	6.0535	340
Pilot_screen_BYxRM	fillin	Haploid-fillin_P1	E20	YCL056C	BY	Haploid	NA	2.978	2.961	0.0377	3.0271	2.9606	5.6173	1004	2.997	2.955	0.0742	3.0897	2.9549	5.9525	9616
Pilot_screen_BYxRM	fillin	Haploid-fillin_P1	E20	YCL056C	RM	Haploid	NA	2.885	2.895	0.0242	2.9116	2.8951	4.9925	1080	2.847	2.851	0.0472	2.9012	2.8508	5.3162	7298
Pilot_screen_BYxRM	haploid-R2	P2	F15,F16	YCL057W	BY	Haploid	OK	3.476	3.5	0.0292	3.5045	3.5003	6.0484	1208	3.523	3.513	0.0498	3.5793	3.5129	6.6236	12121
Pilot_screen_BYxRM	haploid-R2	P2	F15,F16	YCL057W	RM	Haploid	OK	3.411	3.423	0.0249	3.4319	3.4235	5.8234	1579	3.421	3.43	0.0356	3.4574	3.4302	6.1424	14938
Pilot_screen_BYxRM	haploid-R1	P2	F16	YCL057W	BY	Haploid	OK	3.386	3.409	0.025	3.4118	3.4091	5.8401	782	3.418	3.411	0.0492	3.4722	3.4109	6.3751	8694
Pilot_screen_BYxRM	haploid-R1	P2	F16	YCL057W	RM	Haploid	OK	3.352	3.367	0.0212	3.3823	3.3672	6.4761	732	3.347	3.353	0.0331	3.3847	3.3532	6.1538	6439
Pilot_screen_BYxRM	haploid-R2	P6	L12	YCL059C	BY	Haploid	Bad-count-mean-var	3.268	3.287	0.094	3.3649	3.2865	6.3226	201	3.263	3.279	0.0953	3.3617	3.2788	6.3353	2662
Pilot_screen_BYxRM	haploid-R2	P6	L12	YCL059C	RM	Haploid	Bad-mean-var	3.305	3.449	0.1118	3.4148	3.4495	6.4698	285	3.279	3.42	0.1469	3.4159	3.4201	6.5159	2193
Pilot_screen_BYxRM	haploid-R1	P6	L12	YCL059C	BY	Haploid	Bad-mean-var	2.924	2.927	0.0221	2.9536	2.9271	5.294	840	2.942	2.925	0.0461	3.0077	2.925	5.8517	8325
Pilot_screen_BYxRM	haploid-R1	P6	L12	YCL059C	RM	Haploid	Bad-mean-var	2.867	2.877	0.0226	2.894	2.8771	4.9825	481	2.881	2.884	0.0354	2.9235	2.8841	5.3259	4831
Pilot_screen_BYxRM	fillin	Haploid-fillin_P1	E21	YCL059C	BY	Haploid	NA	3.248	3.19	0.0613	3.3201	3.1904	6.2044	727	3.321	3.329	0.0932	3.4228	3.329	6.5184	6453
Pilot_screen_BYxRM	fillin	Haploid-fillin_P1	E21	YCL059C	RM	Haploid	NA	3.163	3.111	0.0598	3.2355	3.1108	6.0592	351	3.187	3.135	0.0842	3.2848	3.1351	6.2778	1962
Pilot_screen_BYxRM	haploid-R2	P1	O15,O16	YCL061C	BY	Haploid	OK	3.041	3.055	0.0352	3.0773	3.0547	5.473	1093	3.069	3.073	0.0566	3.1325	3.0729	5.8541	10932
Pilot_screen_BYxRM	haploid-R2	P1	O15,O16	YCL061C	RM	Haploid	OK	3.026	3.044	0.0504	3.0804	3.0438	5.8196	1197	3.027	3.054	0.0649	3.0928	3.0536	5.7798	11656
Pilot_screen_BYxRM	haploid-R1	P1	P15	YCL061C	BY	Haploid	OK	2.944	2.946	0.0206	2.9729	2.9456	5.4453	708	2.981	2.964	0.0478	3.043	2.9639	5.7728	7440
Pilot_screen_BYxRM	haploid-R1	P1	P15	YCL061C	RM	Haploid	OK	2.923	2.934	0.0259	2.954	2.9343	5.1767	479	2.94	2.949	0.0385	2.9833	2.9493	5.3583	4397
Pilot_screen_BYxRM	haploid-R2	P6	G01	YCL064C	BY	Haploid	OK	3.586	3.62	0.0701	3.6547	3.6199	6.7469	556	3.59	3.62	0.0661	3.6572	3.6202	6.7609	6084
Pilot_screen_BYxRM	haploid-R2	P6	G01	YCL064C	RM	Haploid	OK	3.375	3.417	0.1068	3.4804	3.4168	6.5913	574	3.364	3.409	0.1139	3.481	3.4089	6.7795	5265
Pilot_screen_BYxRM	haploid-R1	P6	G1	YCL064C	BY	Haploid	OK	3.51	3.56	0.0483	3.555	3.5604	6.3139	741	3.491	3.53	0.0622	3.5506	3.53	6.481	7718
Pilot_screen_BYxRM	haploid-R1	P6	G1	YCL064C	RM	Haploid	OK	3.363	3.381	0.086	3.4541	3.3807	6.5005	823	3.359	3.366	0.1002	3.4737	3.3664	7.2975	7891
Pilot_screen_BYxRM	haploid-R2	P6	H22	YCR002C	BY	Haploid	OK	3.465	3.498	0.0308	3.4952	3.4984	6.0318	348	3.478	3.5	0.0323	3.5098	3.4997	6.1326	4233
Pilot_screen_BYxRM	haploid-R2	P6	H22	YCR002C	RM	Haploid	OK	3.41	3.445	0.0396	3.4441	3.4453	5.927	297	3.419	3.449	0.0511	3.465	3.4488	6.1553	2180
Pilot_screen_BYxRM	haploid-R1	P6	H22	YCR002C	BY	Haploid	OK	3.365	3.378	0.0136	3.3784	3.3778	5.4989	731	3.367	3.374	0.0287	3.3967	3.3741	5.9576	7275
Pilot_screen_BYxRM	haploid-R1	P6	H22	YCR002C	RM	Haploid	OK	3.307	3.342	0.0255	3.3309	3.3418	5.5499	403	3.323	3.357	0.0382	3.3589	3.3567	5.8459	3988
Pilot_screen_BYxRM	haploid-R2	P8	P17,P18	YCR003W	BY	Haploid	OK	3.052	3.088	0.0298	3.079	3.088	5.1099	1570	3.058	3.078	0.0486	3.107	3.0775	5.5663	15613
Pilot_screen_BYxRM	haploid-R2	P8	P17,P18	YCR003W	RM	Haploid	OK	3.033	3.047	0.0203	3.0534	3.047	4.9821	1226	3.006	3.038	0.0478	3.0506	3.0384	5.3422	11711
Pilot_screen_BYxRM	haploid-R1	P8	P18	YCR003W	BY	Haploid	OK	3.266	3.279	0.0144	3.2816	3.2794	5.3863	1009	3.28	3.276	0.0334	3.3194	3.2762	6.0048	9795
Pilot_screen_BYxRM	haploid-R1	P8	P18	YCR003W	RM	Haploid	OK	3.226	3.249	0.0216	3.2488	3.2495	5.489	434	3.221	3.228	0.0341	3.2592	3.2283	5.8083	4486
Pilot_screen_BYxRM	haploid-R2	P7	F11,F12	YCR004C	BY	Haploid	OK	3.31	3.327	0.0243	3.3321	3.3267	5.5977	1580	3.322	3.327	0.0479	3.3706	3.3272	6.1581	15682
Pilot_screen_BYxRM	haploid-R2	P7	F11,F12	YCR004C	RM	Haploid	OK	3.244	3.261	0.0306	3.2729	3.2615	5.6073	1304	3.249	3.267	0.0465	3.2938	3.267	5.8796	12652
Pilot_screen_BYxRM	haploid-R1	P7	F12	YCR004C	BY	Haploid	OK	3.478	3.49	0.0282	3.5067	3.4896	6.1133	373	3.493	3.487	0.0577	3.5591	3.4869	6.7299	3817
Pilot_screen_BYxRM	haploid-R1	P7	F12	YCR004C	RM	Haploid	Bad-count	3.373	3.406	0.0448	3.4195	3.4057	6.2258	145	3.392	3.423	0.0697	3.4656	3.423	6.5131	1310
Pilot_screen_BYxRM	fillin	Haploid-fillin_P1	E22	YCR004C	BY	Haploid	NA	3.589	3.607	0.05	3.6407	3.6071	6.6634	994	3.586	3.556	0.0698	3.6695	3.5558	7.0453	10429
Pilot_screen_BYxRM	fillin	Haploid-fillin_P1	E22	YCR004C	RM	Haploid	NA	3.498	3.507	0.0257	3.526	3.5071	6.179	605	3.471	3.471	0.0367	3.5125	3.471	6.3852	4236
Pilot_screen_BYxRM	haploid-R2	P4	H06	YCR005C	BY	Haploid	OK	2.903	2.907	0.0428	2.9549	2.9075	5.4588	890	2.934	2.925	0.0655	3.0503	2.9245	6.5567	8737
Pilot_screen_BYxRM	haploid-R2	P4	H06	YCR005C	RM	Haploid	OK	2.856	2.857	0.0736	2.9359	2.8573	5.5883	426	2.89	2.895	0.0618	2.9726	2.8948	6.3208	4155
Pilot_screen_BYxRM	haploid-R1	P4	H6	YCR005C	BY	Haploid	OK	2.935	2.932	0.0278	2.9745	2.9318	5.6037	698	2.968	2.934	0.0642	3.0747	2.9338	6.4627	6959
Pilot_screen_BYxRM	haploid-R1	P4	H6	YCR005C	RM	Haploid	OK	2.889	2.874	0.028	2.9309	2.8745	5.5761	596	2.886	2.883	0.0424	2.9496	2.8835	6.1611	5944
Pilot_screen_BYxRM	haploid-R2	P7	E13,E14	YCR009C	BY	Haploid	OK	3.305	3.339	0.0329	3.3319	3.3389	5.5479	1894	3.311	3.342	0.0544	3.3596	3.3421	5.964	18748
Pilot_screen_BYxRM	haploid-R2	P7	E13,E14	YCR009C	RM	Haploid	OK	3.299	3.327	0.0329	3.3276	3.3275	5.6189	1688	3.293	3.33	0.0508	3.3375	3.3296	5.8684	16523
Pilot_screen_BYxRM	haploid-R1	P7	F13	YCR009C	BY	Haploid	OK	3.435	3.49	0.0529	3.4856	3.4896	6.2127	260	3.428	3.488	0.0946	3.5209	3.4878	6.6196	2887
Pilot_screen_BYxRM	haploid-R1	P7	F13	YCR009C	RM	Haploid	OK	3.453	3.487	0.03	3.4808	3.4874	5.9546	322	3.396	3.452	0.0676	3.4608	3.4517	6.3412	2860
Pilot_screen_BYxRM	haploid-R2	P10	K10,K9	YCR011C	BY	Haploid	OK	2.975	2.996	0.0205	2.9957	2.9962	4.8895	803	2.973	2.987	0.0425	3.0177	2.9874	5.3556	7885
Pilot_screen_BYxRM	haploid-R2	P10	K10,K9	YCR011C	RM	Haploid	OK	2.898	2.912	0.0196	2.9174	2.9116	4.733	1683	2.895	2.911	0.0336	2.9283	2.9111	5.0069	15797
Pilot_screen_BYxRM	haploid-R1	P10	K9	YCR011C	BY	Haploid	OK	3.19	3.188	0.0115	3.2033	3.1885	5.3036	857	3.199	3.186	0.0271	3.2333	3.1862	5.822	8681
Pilot_screen_BYxRM	haploid-R1	P10	K9	YCR011C	RM	Haploid	OK	3.14	3.146	0.0136	3.1559	3.1464	5.2753	745	3.153	3.155	0.0221	3.1785	3.1554	5.4664	7193
Pilot_screen_BYxRM	fillin	Haploid-fillin_P1	E23	YCR011C	BY	Haploid	NA	3.244	3.248	0.0174	3.264	3.2484	5.5458	1188	3.237	3.218	0.0363	3.2824	3.2178	6.0052	9599
Pilot_screen_BYxRM	fillin	Haploid-fillin_P1	E23	YCR011C	RM	Haploid	NA	3.178	3.175	0.0128	3.1926	3.1751	5.2222	1083	3.138	3.139	0.0235	3.1648	3.139	5.4618	7051
Pilot_screen_BYxRM	haploid-R2	P5	F23	YCR012W	BY	Haploid	OK	5.029	5.108	0.1544	5.1036	5.1083	9.2885	363	5.032	5.107	0.1531	5.1088	5.1066	9.3675	3748
Pilot_screen_BYxRM	haploid-R2	P5	F23	YCR012W	RM	Haploid	OK	5.04	5.062	0.0692	5.0824	5.0619	9.2214	340	5.025	5.088	0.1355	5.091	5.0881	9.2813	3251
Pilot_screen_BYxRM	haploid-R1	P5	F23	YCR012W	BY	Haploid	Bad-count	4.79	5.027	0.3463	5.0207	5.0276	9.7171	28	4.983	5.187	0.3192	5.17	5.1873	9.8618	834
Pilot_screen_BYxRM	haploid-R1	P5	F23	YCR012W	RM	Haploid	OK	4.971	5.043	0.1596	5.0417	5.0429	9.0558	1497	4.937	5.037	0.2426	5.0499	5.0375	9.3627	14378
Pilot_screen_BYxRM	haploid-R2	P7	H21,H22	YCR016W	BY	Haploid	OK	2.904	2.917	0.0166	2.9211	2.9174	4.6522	1496	2.903	2.917	0.0283	2.9324	2.9171	4.9695	14831
Pilot_screen_BYxRM	haploid-R2	P7	H21,H22	YCR016W	RM	Haploid	OK	2.944	2.957	0.0176	2.9614	2.957	4.7422	1313	2.927	2.955	0.0332	2.9591	2.9551	5.009	12980
Pilot_screen_BYxRM	haploid-R1	P7	G22	YCR016W	BY	Haploid	OK	3.124	3.134	0.0144	3.1399	3.1339	5.1772	436	3.119	3.122	0.0276	3.151	3.1223	5.5777	4307
Pilot_screen_BYxRM	haploid-R1	P7	G22	YCR016W	RM	Haploid	OK	3.152	3.169	0.011	3.1644	3.1693	5.0398	274	3.153	3.168	0.0266	3.1809	3.1681	5.4615	2740
Pilot_screen_BYxRM	haploid-R2	P10	M3,M4	YCR017C	BY	Haploid	OK	2.827	2.835	0.0174	2.8462	2.8354	4.6412	637	2.834	2.836	0.0493	2.8908	2.8361	5.2842	6362
Pilot_screen_BYxRM	haploid-R2	P10	M3,M4	YCR017C	RM	Haploid	OK	2.783	2.792	0.0207	2.8052	2.792	4.6104	1462	2.777	2.796	0.0349	2.8134	2.7957	4.8222	13845
Pilot_screen_BYxRM	haploid-R1	P10	M3	YCR017C	BY	Haploid	OK	3.054	3.06	0.012	3.0676	3.0605	4.9922	859	3.073	3.064	0.0298	3.1115	3.0643	5.6749	8502
Pilot_screen_BYxRM	haploid-R1	P10	M3	YCR017C	RM	Haploid	OK	3.053	3.059	0.0137	3.0684	3.059	4.9515	469	3.046	3.049	0.0272	3.0769	3.0495	5.3709	4666
Pilot_screen_BYxRM	fillin	Haploid-fillin_P1	E24	YCR017C	BY	Haploid	NA	3.157	3.153	0.0243	3.1874	3.1534	5.6548	1113	3.144	3.114	0.0484	3.2052	3.1143	6.006	10294
Pilot_screen_BYxRM	fillin	Haploid-fillin_P1	E24	YCR017C	RM	Haploid	NA	3.081	3.091	0.0184	3.1019	3.0908	5.223	766	3.034	3.042	0.0319	3.0703	3.0423	5.3923	5783
Pilot_screen_BYxRM	haploid-R2	P8	J23,J24	YCR018C	BY	Haploid	OK	2.721	2.733	0.0303	2.755	2.733	4.7432	1295	2.762	2.763	0.0589	2.8261	2.763	5.1569	13023
Pilot_screen_BYxRM	haploid-R2	P8	J23,J24	YCR018C	RM	Haploid	OK	2.604	2.628	0.0455	2.6488	2.6278	4.5751	1159	2.614	2.641	0.0612	2.6739	2.6412	4.7584	11230
Pilot_screen_BYxRM	haploid-R1	P8	I24	YCR018C	BY	Haploid	OK	2.941	2.952	0.0244	2.9702	2.9515	5.2038	944	2.97	2.954	0.0516	3.0369	2.9538	5.7995	9680
Pilot_screen_BYxRM	haploid-R1	P8	I24	YCR018C	RM	Haploid	OK	2.93	2.935	0.0256	2.9615	2.9353	5.2243	537	2.949	2.954	0.0415	2.9982	2.9542	5.5169	4999
Pilot_screen_BYxRM	haploid-R2	P9	P15,P16	YCR018C-A	BY	Haploid	OK	3.214	3.3	0.1138	3.3183	3.2997	6.194	1802	3.181	3.234	0.1192	3.2993	3.2342	6.2923	17943
Pilot_screen_BYxRM	haploid-R2	P9	P15,P16	YCR018C-A	RM	Haploid	OK	3.221	3.273	0.087	3.3066	3.2733	6.1348	1527	3.198	3.254	0.1196	3.3141	3.2541	6.3183	14976
Pilot_screen_BYxRM	haploid-R1	P9	P16	YCR018C-A	BY	Haploid	OK	3.458	3.509	0.0664	3.5238	3.5093	6.4444	1100	3.42	3.465	0.081	3.5026	3.4649	6.5555	11031
Pilot_screen_BYxRM	haploid-R1	P9	P16	YCR018C-A	RM	Haploid	OK	3.413	3.45	0.0536	3.4672	3.4496	6.2615	329	3.365	3.405	0.0787	3.4466	3.4052	6.4678	3188
Pilot_screen_BYxRM	haploid-R2	P8	J13,J14	YCR020C	BY	Haploid	OK	2.634	2.638	0.0334	2.6728	2.6381	4.7207	1687	2.692	2.674	0.0767	2.7785	2.6742	5.2292	16756
Pilot_screen_BYxRM	haploid-R2	P8	J13,J14	YCR020C	RM	Haploid	OK	2.554	2.571	0.0432	2.5997	2.571	4.524	1087	2.553	2.57	0.0611	2.6176	2.5698	4.7784	10534
Pilot_screen_BYxRM	haploid-R1	P8	I14	YCR020C	BY	Haploid	OK	2.884	2.874	0.0316	2.9321	2.8736	5.6162	911	2.945	2.896	0.0755	3.0543	2.8965	6.1477	9502
Pilot_screen_BYxRM	haploid-R1	P8	I14	YCR020C	RM	Haploid	OK	2.931	2.908	0.0493	2.9937	2.908	5.6264	825	2.946	2.923	0.0687	3.0341	2.9235	5.9169	7724
Pilot_screen_BYxRM	haploid-R2	P9	P13,P14	YCR020W-B	BY	Haploid	OK	3.113	3.131	0.0187	3.1309	3.1306	5.0903	1484	3.113	3.127	0.0267	3.1398	3.1271	5.3172	14606
Pilot_screen_BYxRM	haploid-R2	P9	P13,P14	YCR020W-B	RM	Haploid	OK	3.112	3.14	0.0195	3.1299	3.1396	5.0318	634	3.082	3.127	0.0442	3.1205	3.1274	5.3214	6202
Pilot_screen_BYxRM	haploid-R1	P9	P14	YCR020W-B	BY	Haploid	OK	3.297	3.305	0.0109	3.3084	3.3054	5.356	1086	3.295	3.302	0.0203	3.317	3.3017	5.6518	10170
Pilot_screen_BYxRM	haploid-R1	P9	P14	YCR020W-B	RM	Haploid	Bad-count	3.266	3.288	0.0215	3.2857	3.2881	5.3806	237	3.283	3.298	0.0317	3.3153	3.2977	5.9264	3004
Pilot_screen_BYxRM	haploid-R2	P11	E5,E6	YCR021C	BY	Haploid	Bad-count	3.027	3.024	0.2472	3.307	3.0244	6.9095	27	3.565	3.529	0.2654	3.8705	3.5289	8.0813	686
Pilot_screen_BYxRM	haploid-R2	P11	E5,E6	YCR021C	RM	Haploid	Bad-count	2.923	2.887	0.1841	3.1507	2.8868	6.6168	101	2.975	2.883	0.2914	3.3913	2.8827	7.3981	989
Pilot_screen_BYxRM	haploid-R1	P11	E5	YCR021C	BY	Haploid	OK	3.291	3.21	0.1346	3.4933	3.2101	7.2758	802	3.363	3.241	0.2197	3.671	3.2414	7.7821	9096
Pilot_screen_BYxRM	haploid-R1	P11	E5	YCR021C	RM	Haploid	OK	3.298	3.26	0.1148	3.4693	3.2598	7.1638	686	3.38	3.291	0.1899	3.6517	3.2911	7.7122	5741
Pilot_screen_BYxRM	haploid-R2	P10	C19,C20	YCR023C	BY	Haploid	OK	2.66	2.671	0.0248	2.6883	2.6715	4.5505	2129	2.698	2.688	0.0603	2.7684	2.6877	5.1492	21382
Pilot_screen_BYxRM	haploid-R2	P10	C19,C20	YCR023C	RM	Haploid	OK	2.623	2.645	0.0469	2.6712	2.6455	4.6744	1586	2.652	2.679	0.0573	2.7083	2.6792	4.7825	15216
Pilot_screen_BYxRM	haploid-R1	P10	D19	YCR023C	BY	Haploid	OK	2.977	2.98	0.02	3.0034	2.9798	5.3381	1337	3.012	2.985	0.0479	3.0756	2.9848	5.8406	13392
Pilot_screen_BYxRM	haploid-R1	P10	D19	YCR023C	RM	Haploid	OK	2.926	2.926	0.022	2.9528	2.926	5.0795	473	2.967	2.966	0.0385	3.0123	2.9658	5.4451	4633
Pilot_screen_BYxRM	fillin	Haploid-fillin_P1	F01	YCR023C	BY	Haploid	NA	3.01	3.003	0.0262	3.0417	3.0034	5.3349	958	2.979	2.949	0.0502	3.0444	2.9494	5.757	9576
Pilot_screen_BYxRM	fillin	Haploid-fillin_P1	F01	YCR023C	RM	Haploid	NA	2.942	2.942	0.0181	2.9633	2.9418	5.0107	1186	2.898	2.905	0.0333	2.9356	2.9055	5.1489	7720
Pilot_screen_BYxRM	haploid-R2	P4	H17	YCR024C	BY	Haploid	OK	2.945	2.947	0.033	2.9838	2.9471	5.4236	370	2.953	2.962	0.0379	3.0068	2.9618	6.3111	4180
Pilot_screen_BYxRM	haploid-R2	P4	H17	YCR024C	RM	Haploid	OK	2.839	2.855	0.0375	2.895	2.8549	5.8689	547	2.848	2.862	0.0409	2.897	2.8623	5.4651	4684
Pilot_screen_BYxRM	haploid-R1	P4	H17	YCR024C	BY	Haploid	OK	3.002	2.977	0.0453	3.0647	2.977	5.8406	469	3.062	3.047	0.0643	3.1417	3.0469	6.0013	5222
Pilot_screen_BYxRM	haploid-R1	P4	H17	YCR024C	RM	Haploid	OK	2.938	2.934	0.0243	2.9675	2.9343	5.1951	764	2.941	2.931	0.0478	3.0126	2.9309	6.9978	7086
Pilot_screen_BYxRM	haploid-R2	P11	F17,F18	YCR024C-A	BY	Haploid	OK	3.794	3.887	0.1167	3.8796	3.8873	7.091	2106	3.767	3.843	0.1515	3.8904	3.8427	7.4615	20789
Pilot_screen_BYxRM	haploid-R2	P11	F17,F18	YCR024C-A	RM	Haploid	OK	3.9	3.952	0.0783	3.9511	3.9518	6.9636	1650	3.878	3.944	0.1508	3.9788	3.9444	7.4338	15742
Pilot_screen_BYxRM	haploid-R1	P11	F18	YCR024C-A	BY	Haploid	OK	4.066	4.092	0.0494	4.1035	4.0916	7.2423	907	4.03	4.072	0.0837	4.097	4.0716	7.5721	9274
Pilot_screen_BYxRM	haploid-R1	P11	F18	YCR024C-A	RM	Haploid	OK	4.051	4.086	0.057	4.0934	4.0857	7.2639	672	4.045	4.092	0.0942	4.1207	4.0921	7.6768	6415
Pilot_screen_BYxRM	haploid-R2	P11	A15,A16	YCR027C	BY	Haploid	OK	2.906	2.922	0.0236	2.9321	2.9219	4.9339	1439	2.903	2.919	0.0542	2.9614	2.9192	5.3646	14051
Pilot_screen_BYxRM	haploid-R2	P11	A15,A16	YCR027C	RM	Haploid	OK	2.792	2.8	0.0189	2.8131	2.8004	4.6187	2294	2.788	2.795	0.0397	2.8308	2.7953	4.9617	22129
Pilot_screen_BYxRM	haploid-R1	P11	B15	YCR027C	BY	Haploid	OK	3.128	3.122	0.0149	3.1484	3.1221	5.4932	637	3.123	3.113	0.033	3.1651	3.1132	5.7823	6729
Pilot_screen_BYxRM	haploid-R1	P11	B15	YCR027C	RM	Haploid	OK	3.07	3.067	0.0149	3.0879	3.0667	5.2279	629	3.094	3.099	0.0297	3.1279	3.0989	5.4943	5899
Pilot_screen_BYxRM	fillin	Haploid-fillin_P1	F02	YCR027C	BY	Haploid	NA	3.192	3.181	0.0256	3.2255	3.1806	5.8269	1086	3.243	3.217	0.0469	3.2992	3.2172	6.0962	8687
Pilot_screen_BYxRM	fillin	Haploid-fillin_P1	F02	YCR027C	RM	Haploid	NA	3.1	3.107	0.0146	3.1167	3.1073	5.1772	1583	3.086	3.084	0.026	3.1163	3.0836	5.4268	8979
Pilot_screen_BYxRM	haploid-R2	P10	P21,P22	YCR028C	BY	Haploid	OK	2.797	2.806	0.0227	2.8245	2.8065	5.1268	1595	2.784	2.805	0.0493	2.8354	2.8051	5.0693	15687
Pilot_screen_BYxRM	haploid-R2	P10	P21,P22	YCR028C	RM	Haploid	OK	2.669	2.69	0.0277	2.6984	2.6906	4.4867	1274	2.677	2.692	0.0497	2.7291	2.6924	4.8395	11775
Pilot_screen_BYxRM	haploid-R1	P10	P22	YCR028C	BY	Haploid	OK	3.098	3.1	0.0124	3.1142	3.0999	5.2634	507	3.122	3.108	0.0358	3.1694	3.1085	5.9498	5145
Pilot_screen_BYxRM	haploid-R1	P10	P22	YCR028C	RM	Haploid	OK	3.052	3.062	0.0166	3.0702	3.0624	5.0792	379	3.074	3.073	0.0312	3.1101	3.0729	5.5052	3699
Pilot_screen_BYxRM	fillin	Haploid-fillin_P1	F04	YCR028C	BY	Haploid	NA	3.153	3.151	0.0196	3.177	3.151	5.4967	904	3.162	3.138	0.0442	3.2158	3.1377	5.9335	7518
Pilot_screen_BYxRM	fillin	Haploid-fillin_P1	F04	YCR028C	RM	Haploid	NA	3.109	3.11	0.0151	3.1264	3.1105	5.1764	1240	3.059	3.059	0.0286	3.092	3.0594	5.4081	8241
Pilot_screen_BYxRM	haploid-R2	P9	G19,G20	YCR028C-A	BY	Haploid	Bad-mean	3.217	3.289	0.0626	3.2749	3.2888	5.847	1292	3.211	3.27	0.0992	3.3024	3.2697	6.1377	12817
Pilot_screen_BYxRM	haploid-R2	P9	G19,G20	YCR028C-A	RM	Haploid	Bad-mean	3.099	3.149	0.0529	3.1462	3.1486	5.5141	1940	3.068	3.112	0.0724	3.1382	3.1118	5.7352	17549
Pilot_screen_BYxRM	haploid-R1	P9	G19	YCR028C-A	BY	Haploid	Bad-mean	3.339	3.392	0.0465	3.3868	3.3921	6.0792	587	3.333	3.369	0.0588	3.3942	3.3687	6.223	5751
Pilot_screen_BYxRM	haploid-R1	P9	G19	YCR028C-A	RM	Haploid	Bad-count-mean	3.157	3.15	0.0269	3.1879	3.1505	5.5658	21	3.247	3.243	0.0548	3.3123	3.2429	6.2055	345
Pilot_screen_BYxRM	fillin	Haploid-fillin_P1	F05	YCR028C-A	BY	Haploid	NA	3.424	3.482	0.0511	3.4764	3.4819	6.2765	552	3.47	3.489	0.0718	3.5469	3.4891	6.6454	4574
Pilot_screen_BYxRM	fillin	Haploid-fillin_P1	F05	YCR028C-A	RM	Haploid	NA	3.354	3.397	0.0361	3.3915	3.397	5.9573	303	3.317	3.358	0.0614	3.3816	3.3583	6.2302	1892
Pilot_screen_BYxRM	fillin	Haploid-fillin_P1	F03	YCR028C-A	BY	Haploid	NA	3.424	3.476	0.0533	3.4796	3.4755	6.3404	517	3.47	3.487	0.0788	3.5536	3.4872	6.6969	4584
Pilot_screen_BYxRM	fillin	Haploid-fillin_P1	F03	YCR028C-A	RM	Haploid	NA	3.366	3.404	0.0376	3.403	3.4045	5.9501	443	3.364	3.402	0.0576	3.4232	3.4019	6.2723	2372
Pilot_screen_BYxRM	haploid-R2	P2	G10,G9	YCR030C	BY	Haploid	OK	3.487	3.489	0.0213	3.5108	3.4893	6.0711	914	3.523	3.502	0.0512	3.5813	3.5022	6.6333	9096
Pilot_screen_BYxRM	haploid-R2	P2	G10,G9	YCR030C	RM	Haploid	OK	3.318	3.322	0.0136	3.3328	3.3224	5.4898	1239	3.322	3.327	0.0268	3.3507	3.327	5.844	11454
Pilot_screen_BYxRM	haploid-R1	P2	G9	YCR030C	BY	Haploid	OK	3.353	3.356	0.0152	3.3709	3.3555	5.7895	820	3.399	3.366	0.0412	3.4499	3.366	6.4136	9732
Pilot_screen_BYxRM	haploid-R1	P2	G9	YCR030C	RM	Haploid	OK	3.267	3.27	0.0104	3.2793	3.2699	5.3471	966	3.26	3.26	0.0218	3.2879	3.2603	6.2227	8106
Pilot_screen_BYxRM	haploid-R2	P1	D11,D12	YCR033W	BY	Haploid	OK	3.037	3.051	0.029	3.0703	3.0508	5.3943	1887	3.073	3.074	0.0497	3.1297	3.074	5.8032	18862
Pilot_screen_BYxRM	haploid-R2	P1	D11,D12	YCR033W	RM	Haploid	OK	3.007	3.021	0.0323	3.0416	3.0212	5.3043	1162	3.021	3.043	0.0499	3.0713	3.043	5.4937	11155
Pilot_screen_BYxRM	haploid-R1	P1	C12	YCR033W	BY	Haploid	OK	2.969	2.973	0.0176	3.0062	2.9729	6.2565	1242	2.987	2.969	0.0354	3.0375	2.9686	5.9729	13194
Pilot_screen_BYxRM	haploid-R1	P1	C12	YCR033W	RM	Haploid	OK	2.928	2.933	0.0145	2.945	2.9328	4.7989	1137	2.952	2.956	0.0277	2.9856	2.9557	5.5792	10591
Pilot_screen_BYxRM	haploid-R2	P11	A10,A9	YCR034W	BY	Haploid	Bad-count	3.293	3.262	0.1165	3.4119	3.2639	6.4886	36	3.245	3.254	0.1154	3.3684	3.2542	6.5232	636
Pilot_screen_BYxRM	haploid-R2	P11	A10,A9	YCR034W	RM	Haploid	Bad-count	3.32	3.384	0.0627	3.372	3.3841	5.9114	200	3.302	3.369	0.086	3.3706	3.3688	6.0515	1718
Pilot_screen_BYxRM	haploid-R1	P11	A9	YCR034W	BY	Haploid	OK	3.584	3.599	0.017	3.6013	3.5989	6.0253	1432	3.563	3.575	0.027	3.5913	3.5745	6.2629	15186
Pilot_screen_BYxRM	haploid-R1	P11	A9	YCR034W	RM	Haploid	OK	3.58	3.6	0.0233	3.6021	3.5998	6.1028	1311	3.595	3.613	0.0336	3.628	3.6134	6.3964	12086
Pilot_screen_BYxRM	haploid-R2	P5	N22	YCR035C	BY	Haploid	Bad-var	3.297	3.307	0.0259	3.3766	3.3071	7.913	829	3.287	3.305	0.0241	3.3177	3.3049	6.9254	8442
Pilot_screen_BYxRM	haploid-R2	P5	N22	YCR035C	RM	Haploid	Bad-var	3.286	3.304	0.0231	3.3087	3.3044	5.5655	604	3.297	3.31	0.0244	3.3225	3.3098	5.6915	5866
Pilot_screen_BYxRM	haploid-R1	P5	N22	YCR035C	BY	Haploid	Bad-var	3.285	3.29	0.0123	3.2986	3.2901	5.4595	359	3.335	3.31	0.0404	3.3846	3.3103	6.2497	4509
Pilot_screen_BYxRM	haploid-R1	P5	N22	YCR035C	RM	Haploid	Bad-var	3.289	3.302	0.0133	3.3055	3.3016	5.753	790	3.272	3.284	0.0278	3.3014	3.2842	5.7404	6944
Pilot_screen_BYxRM	fillin	Haploid-fillin_P1	F06	YCR035C	BY	Haploid	NA	3.354	3.352	0.017	3.3734	3.3525	5.7455	759	3.356	3.337	0.0357	3.3988	3.3367	6.1989	7549
Pilot_screen_BYxRM	fillin	Haploid-fillin_P1	F06	YCR035C	RM	Haploid	NA	3.333	3.334	0.0103	3.344	3.3345	5.3876	1477	3.302	3.307	0.0216	3.3258	3.3067	5.7024	8412
Pilot_screen_BYxRM	haploid-R2	P6	H11	YCR036W	BY	Haploid	OK	3.267	3.266	0.0184	3.2879	3.2661	5.5783	480	3.265	3.274	0.0313	3.2992	3.2741	5.8136	5205
Pilot_screen_BYxRM	haploid-R2	P6	H11	YCR036W	RM	Haploid	Bad-count	3.171	3.168	0.0202	3.1947	3.1679	5.4459	224	3.182	3.189	0.0367	3.224	3.1891	5.8942	1854
Pilot_screen_BYxRM	haploid-R1	P6	H11	YCR036W	BY	Haploid	OK	3.185	3.183	0.0137	3.2025	3.1828	5.5439	975	3.189	3.188	0.0265	3.2222	3.1879	5.8314	9534
Pilot_screen_BYxRM	haploid-R1	P6	H11	YCR036W	RM	Haploid	Bad-count	3.166	3.156	0.0182	3.1939	3.156	5.8706	234	3.172	3.166	0.0354	3.2161	3.1663	5.9602	2543
Pilot_screen_BYxRM	haploid-R2	P10	M1,M2	YCR037C	BY	Haploid	OK	2.644	2.657	0.0243	2.6712	2.6567	4.4574	1134	2.661	2.67	0.0447	2.7115	2.6696	4.8497	11196
Pilot_screen_BYxRM	haploid-R2	P10	M1,M2	YCR037C	RM	Haploid	OK	2.568	2.597	0.0432	2.608	2.5976	4.3892	1486	2.587	2.613	0.0557	2.6411	2.6134	4.6473	14178
Pilot_screen_BYxRM	haploid-R1	P10	M1	YCR037C	BY	Haploid	OK	2.938	2.941	0.0214	2.9721	2.9414	5.795	820	2.951	2.942	0.0402	3.0047	2.9424	5.7015	8414
Pilot_screen_BYxRM	haploid-R1	P10	M1	YCR037C	RM	Haploid	OK	2.936	2.941	0.0203	2.9598	2.9411	5.0508	500	2.944	2.946	0.0334	2.9833	2.9464	5.3181	4763
Pilot_screen_BYxRM	fillin	Haploid-fillin_P1	F07	YCR037C	BY	Haploid	NA	3.025	3.02	0.0207	3.0508	3.0202	5.343	1436	3.011	2.985	0.0427	3.0655	2.9846	5.6974	10229
Pilot_screen_BYxRM	fillin	Haploid-fillin_P1	F07	YCR037C	RM	Haploid	NA	3.012	3.017	0.0161	3.0305	3.0172	5.0149	1227	2.987	2.992	0.0288	3.0192	2.9924	5.2383	6636
Pilot_screen_BYxRM	haploid-R2	P3	E18	YCR038C	BY	Haploid	Bad-count	2.949	2.922	0.036	2.9947	2.9219	5.4592	103	2.956	2.941	0.0504	3.037	2.9408	6.2238	1248
Pilot_screen_BYxRM	haploid-R2	P3	E18	YCR038C	RM	Haploid	OK	2.799	2.806	0.0353	2.8353	2.806	4.8861	458	2.837	2.853	0.0412	2.8867	2.853	5.4591	4333
Pilot_screen_BYxRM	haploid-R1	P3	E18	YCR038C	BY	Haploid	OK	2.939	2.917	0.0381	2.9941	2.9166	5.7112	489	2.988	2.949	0.0683	3.0758	2.9493	5.9697	6562
Pilot_screen_BYxRM	haploid-R1	P3	E18	YCR038C	RM	Haploid	OK	2.865	2.871	0.0209	2.8946	2.8706	5.4654	1587	2.87	2.871	0.0365	2.9142	2.8712	5.4384	14152
Pilot_screen_BYxRM	fillin	Haploid-fillin_P1	F08	YCR038C	BY	Haploid	NA	3.003	2.983	0.0305	3.0435	2.9832	5.5524	689	3.04	2.985	0.0688	3.1273	2.9851	5.9896	6697
Pilot_screen_BYxRM	fillin	Haploid-fillin_P1	F08	YCR038C	RM	Haploid	NA	2.914	2.922	0.0175	2.9332	2.9224	4.8296	1337	2.874	2.878	0.031	2.9094	2.878	5.1004	8573
Pilot_screen_BYxRM	haploid-R2	P1	C1,C2	YCR042C	BY	Haploid	OK	3.028	3.044	0.0322	3.0641	3.0441	5.4334	1109	3.08	3.07	0.0711	3.1638	3.0699	6.0607	11051
Pilot_screen_BYxRM	haploid-R2	P1	C1,C2	YCR042C	RM	Haploid	OK	2.942	3.004	0.0815	3.0135	3.0037	5.5759	1574	2.947	3	0.0918	3.0274	3.0004	5.5781	15134
Pilot_screen_BYxRM	haploid-R1	P1	C1	YCR042C	BY	Haploid	OK	2.889	2.896	0.0188	2.913	2.8965	5.1377	1622	2.925	2.908	0.0482	2.9888	2.9085	5.6976	17247
Pilot_screen_BYxRM	haploid-R1	P1	C1	YCR042C	RM	Haploid	OK	2.872	2.875	0.0191	2.8976	2.8754	5.1386	887	2.894	2.895	0.0348	2.9533	2.8954	6.5729	7782
Pilot_screen_BYxRM	haploid-R2	P9	D3,D4	YCR043C	BY	Haploid	OK	3.072	3.09	0.0225	3.095	3.0905	5.1319	1516	3.075	3.09	0.0331	3.1093	3.0901	5.384	15101
Pilot_screen_BYxRM	haploid-R2	P9	D3,D4	YCR043C	RM	Haploid	OK	3.047	3.053	0.0119	3.0599	3.0534	4.8432	1965	3.048	3.055	0.0265	3.0761	3.0546	5.2494	19372
Pilot_screen_BYxRM	haploid-R1	P9	C4	YCR043C	BY	Haploid	OK	3.244	3.251	0.0119	3.2574	3.2513	5.2838	2105	3.247	3.247	0.024	3.2741	3.2469	5.6872	20798
Pilot_screen_BYxRM	haploid-R1	P9	C4	YCR043C	RM	Haploid	OK	3.246	3.26	0.0156	3.2622	3.2599	5.3377	775	3.259	3.274	0.0298	3.2904	3.2739	5.7468	7898
Pilot_screen_BYxRM	haploid-R2	P11	O10,O9	YCR044C	BY	Haploid	Bad-count-var	2.844	2.788	0.0889	2.96	2.7885	5.8497	20	3.026	3.035	0.0635	3.0962	3.0349	5.7359	439
Pilot_screen_BYxRM	haploid-R2	P11	O10,O9	YCR044C	RM	Haploid	Bad-count-var	2.828	2.854	0.0194	2.8487	2.8542	4.6244	119	2.813	2.83	0.0565	2.8716	2.8305	5.1853	1041
Pilot_screen_BYxRM	haploid-R1	P11	O9	YCR044C	BY	Haploid	Bad-var	3.13	3.136	0.0134	3.1443	3.1361	5.0817	775	3.149	3.139	0.027	3.1835	3.1393	5.7412	7774
Pilot_screen_BYxRM	haploid-R1	P11	O9	YCR044C	RM	Haploid	Bad-var	3.091	3.099	0.0157	3.1085	3.0992	5.0948	447	3.097	3.101	0.0255	3.1256	3.1014	5.4151	4379
Pilot_screen_BYxRM	fillin	Haploid-fillin_P1	F09	YCR044C	BY	Haploid	NA	3.207	3.211	0.0155	3.2243	3.211	5.3729	1616	3.198	3.189	0.0293	3.2326	3.1892	5.7501	11378
Pilot_screen_BYxRM	fillin	Haploid-fillin_P1	F09	YCR044C	RM	Haploid	NA	3.153	3.157	0.0127	3.168	3.157	5.1711	1112	3.131	3.133	0.0234	3.1571	3.1334	5.4255	6333
Pilot_screen_BYxRM	haploid-R2	P8	D3,D4	YCR046C	BY	Haploid	OK	2.966	2.978	0.0175	2.9844	2.9776	4.9073	2126	2.973	2.977	0.0372	3.0138	2.9767	5.3406	21155
Pilot_screen_BYxRM	haploid-R2	P8	D3,D4	YCR046C	RM	Haploid	OK	2.972	2.988	0.0212	2.9929	2.9884	4.8939	1450	2.967	2.982	0.0382	3.0046	2.9822	5.2297	14108
Pilot_screen_BYxRM	haploid-R1	P8	D4	YCR046C	BY	Haploid	OK	3.16	3.163	0.0156	3.1788	3.1626	5.4262	1532	3.168	3.16	0.0327	3.2096	3.1597	5.9449	15494
Pilot_screen_BYxRM	haploid-R1	P8	D4	YCR046C	RM	Haploid	OK	3.159	3.166	0.017	3.1781	3.1662	5.2878	842	3.188	3.188	0.0359	3.229	3.1879	5.8018	8276
Pilot_screen_BYxRM	haploid-R2	P11	P1,P2	YCR047C	BY	Haploid	OK	2.92	2.944	0.0325	2.954	2.9443	5.0686	1609	2.928	2.954	0.0381	2.9667	2.9544	5.1452	15808
Pilot_screen_BYxRM	haploid-R2	P11	P1,P2	YCR047C	RM	Haploid	OK	2.979	3	0.0201	3	3.0001	4.912	1392	2.951	2.975	0.0383	2.9903	2.9752	5.1912	13221
Pilot_screen_BYxRM	haploid-R1	P11	P2	YCR047C	BY	Haploid	OK	3.268	3.284	0.018	3.2874	3.2838	5.5372	389	3.266	3.261	0.0342	3.306	3.2606	5.9279	4007
Pilot_screen_BYxRM	haploid-R1	P11	P2	YCR047C	RM	Haploid	OK	3.255	3.261	0.0155	3.2717	3.2608	5.3981	260	3.251	3.267	0.035	3.2879	3.2674	5.7948	2477
Pilot_screen_BYxRM	fillin	Haploid-fillin_P1	F10	YCR047C	BY	Haploid	NA	3.294	3.302	0.0261	3.3238	3.3018	5.7975	543	3.33	3.334	0.0442	3.3794	3.3337	6.1242	5354
Pilot_screen_BYxRM	fillin	Haploid-fillin_P1	F10	YCR047C	RM	Haploid	NA	3.29	3.291	0.0181	3.3105	3.2909	5.6129	577	3.302	3.308	0.0353	3.34	3.3084	5.914	3856
Pilot_screen_BYxRM	haploid-R2	P10	O17,O18	YCR048W	BY	Haploid	OK	2.64	2.65	0.0356	2.6857	2.6501	5.0158	418	2.731	2.736	0.0611	2.7995	2.7364	5.2095	4321
Pilot_screen_BYxRM	haploid-R2	P10	O17,O18	YCR048W	RM	Haploid	OK	2.601	2.625	0.055	2.6542	2.6254	4.669	1348	2.627	2.65	0.0594	2.685	2.6496	4.7687	12963
Pilot_screen_BYxRM	haploid-R1	P10	P17	YCR048W	BY	Haploid	OK	2.98	2.987	0.0163	3.0014	2.9869	5.2651	696	3.017	3	0.0411	3.0729	3	5.828	6922
Pilot_screen_BYxRM	haploid-R1	P10	P17	YCR048W	RM	Haploid	OK	2.937	2.937	0.0155	2.9546	2.9371	4.8545	646	2.953	2.953	0.0292	2.9876	2.9533	5.2953	6313
Pilot_screen_BYxRM	fillin	Haploid-fillin_P1	F11	YCR048W	BY	Haploid	NA	3.049	3.047	0.0165	3.0712	3.0471	5.5465	1717	3.052	3.032	0.0368	3.1007	3.0316	5.8102	11217
Pilot_screen_BYxRM	fillin	Haploid-fillin_P1	F11	YCR048W	RM	Haploid	NA	3.01	3.013	0.0189	3.0379	3.0133	5.6712	1121	2.991	2.993	0.0288	3.028	2.9933	5.6577	5980
Pilot_screen_BYxRM	haploid-R2	P8	A1,A2	YCR051W	BY	Haploid	OK	2.928	2.939	0.0184	2.9483	2.9388	4.8686	1954	2.944	2.943	0.0466	2.9976	2.9427	5.4856	19363
Pilot_screen_BYxRM	haploid-R2	P8	A1,A2	YCR051W	RM	Haploid	OK	2.815	2.823	0.0178	2.8346	2.8232	4.6056	1892	2.811	2.824	0.0374	2.8498	2.8243	4.929	18531
Pilot_screen_BYxRM	haploid-R1	P8	A1	YCR051W	BY	Haploid	OK	3.024	3.023	0.0222	3.0512	3.0226	5.3051	1775	3.058	3.039	0.0524	3.1258	3.0394	5.9656	17307
Pilot_screen_BYxRM	haploid-R1	P8	A1	YCR051W	RM	Haploid	OK	2.998	2.997	0.0229	3.0246	2.9973	5.1909	855	3.022	3.027	0.0417	3.0691	3.0268	5.5887	8176
Pilot_screen_BYxRM	haploid-R2	P4	K18	YCR053W	BY	Haploid	OK	4.119	4.175	0.0805	4.1747	4.1746	7.493	697	4.112	4.171	0.0798	4.1709	4.1715	7.5528	7380
Pilot_screen_BYxRM	haploid-R2	P4	K18	YCR053W	RM	Haploid	OK	4.049	4.102	0.0891	4.1099	4.1017	7.4026	486	4.046	4.114	0.1122	4.1213	4.1136	7.5041	4495
Pilot_screen_BYxRM	haploid-R1	P4	K18	YCR053W	BY	Haploid	OK	4.016	4.055	0.0469	4.051	4.0552	7.0599	426	3.965	4.03	0.0901	4.0334	4.0297	7.3545	5261
Pilot_screen_BYxRM	haploid-R1	P4	K18	YCR053W	RM	Haploid	OK	3.989	4.024	0.0497	4.0235	4.0239	6.9819	816	3.97	4.02	0.0779	4.0275	4.0197	7.273	7018
Pilot_screen_BYxRM	fillin	Haploid-fillin_P1	F12	YCR053W	BY	Haploid	NA	4.125	4.171	0.0527	4.166	4.1707	7.3952	1250	4.096	4.127	0.0607	4.1482	4.1271	7.5763	8969
Pilot_screen_BYxRM	fillin	Haploid-fillin_P1	F12	YCR053W	RM	Haploid	NA	4.119	4.133	0.029	4.142	4.1334	7.1629	1454	4.08	4.102	0.0561	4.1246	4.102	7.4506	7743
Pilot_screen_BYxRM	haploid-R2	P3	J10	YCR054C	BY	Haploid	OK	2.998	3.012	0.0219	3.0207	3.0124	5.0342	1113	3.021	3.034	0.0241	3.0464	3.0343	5.1433	10422
Pilot_screen_BYxRM	haploid-R2	P3	J10	YCR054C	RM	Haploid	OK	2.95	2.961	0.0377	2.9889	2.9608	5.2036	284	2.991	3.009	0.035	3.0261	3.0094	5.2327	3537
Pilot_screen_BYxRM	haploid-R1	P3	J10	YCR054C	BY	Haploid	OK	3.099	3.1	0.0191	3.1239	3.1001	5.4749	274	3.158	3.138	0.043	3.2096	3.1376	5.8963	3674
Pilot_screen_BYxRM	haploid-R1	P3	J10	YCR054C	RM	Haploid	OK	3.04	3.036	0.0144	3.0567	3.0359	5.0878	732	3.027	3.03	0.0262	3.0567	3.0297	5.2914	6383
Pilot_screen_BYxRM	fillin	Haploid-fillin_P1	F13	YCR054C	BY	Haploid	NA	3.128	3.128	0.0182	3.1497	3.1281	5.3845	1093	3.129	3.106	0.0423	3.1817	3.1063	5.8863	8834
Pilot_screen_BYxRM	fillin	Haploid-fillin_P1	F13	YCR054C	RM	Haploid	NA	3.078	3.084	0.0149	3.0946	3.084	5.1055	917	3.039	3.041	0.0279	3.0706	3.041	5.3579	5681
Pilot_screen_BYxRM	haploid-R2	P11	B3,B4	YCR057C	BY	Haploid	OK	3.156	3.186	0.0236	3.179	3.1863	5.2753	2449	3.135	3.158	0.038	3.1731	3.1584	5.533	24424
Pilot_screen_BYxRM	haploid-R2	P11	B3,B4	YCR057C	RM	Haploid	OK	3.136	3.152	0.0215	3.1561	3.1516	5.1599	1948	3.133	3.152	0.0391	3.1712	3.1518	5.5381	18758
Pilot_screen_BYxRM	haploid-R1	P11	B4	YCR057C	BY	Haploid	OK	3.367	3.374	0.0149	3.383	3.3744	5.7004	1460	3.353	3.358	0.0297	3.3865	3.3582	5.9972	15753
Pilot_screen_BYxRM	haploid-R1	P11	B4	YCR057C	RM	Haploid	OK	3.349	3.364	0.0174	3.3665	3.3644	5.5792	1472	3.363	3.38	0.0341	3.3978	3.3802	5.9575	13596
Pilot_screen_BYxRM	haploid-R2	P7	O3,O4	YCR059C	BY	Haploid	OK	2.863	2.873	0.0128	2.8778	2.8731	4.5552	940	2.861	2.871	0.0268	2.8901	2.8708	4.9106	9205
Pilot_screen_BYxRM	haploid-R2	P7	O3,O4	YCR059C	RM	Haploid	OK	2.873	2.895	0.0474	2.9181	2.8949	5.0955	938	2.9	2.925	0.0541	2.9522	2.9246	5.2261	9287
Pilot_screen_BYxRM	haploid-R1	P7	P3	YCR059C	BY	Haploid	OK	3.05	3.058	0.0123	3.0636	3.0582	4.9108	612	3.067	3.062	0.0275	3.1015	3.062	5.5819	6127
Pilot_screen_BYxRM	haploid-R1	P7	P3	YCR059C	RM	Haploid	Bad-count	3.049	3.06	0.0164	3.066	3.0595	4.9782	222	3.047	3.056	0.0232	3.0735	3.0563	5.2533	2218
Pilot_screen_BYxRM	haploid-R2	P9	A15,A16	YCR060W	BY	Haploid	OK	2.837	2.847	0.0227	2.8624	2.847	4.8167	2418	2.864	2.852	0.052	2.9376	2.8518	5.8722	23927
Pilot_screen_BYxRM	haploid-R2	P9	A15,A16	YCR060W	RM	Haploid	OK	2.817	2.828	0.0233	2.8434	2.8281	4.8364	2213	2.823	2.83	0.0446	2.8733	2.8301	5.333	21746
Pilot_screen_BYxRM	haploid-R1	P9	B15	YCR060W	BY	Haploid	OK	3.105	3.105	0.0179	3.127	3.1049	5.3533	1242	3.121	3.108	0.0397	3.1731	3.1085	6.0656	13017
Pilot_screen_BYxRM	haploid-R1	P9	B15	YCR060W	RM	Haploid	OK	3.057	3.058	0.0181	3.0793	3.0582	5.4673	1337	3.077	3.075	0.0369	3.1198	3.0755	5.6374	12604
Pilot_screen_BYxRM	haploid-R2	P3	A10	YCR061W	BY	Haploid	Bad-var	2.919	2.907	0.053	3.0226	2.9072	6.346	419	2.945	2.933	0.0546	3.0346	2.9335	6.2538	4581
Pilot_screen_BYxRM	haploid-R2	P3	A10	YCR061W	RM	Haploid	Bad-var	2.839	2.847	0.0407	2.8943	2.8473	5.699	920	2.868	2.88	0.0459	2.9336	2.8804	6.1688	8722
Pilot_screen_BYxRM	haploid-R1	P3	A10	YCR061W	BY	Haploid	Bad-var	2.957	2.953	0.0251	2.9938	2.9533	5.5632	1042	2.976	2.955	0.0535	3.0521	2.9552	6.0077	11783
Pilot_screen_BYxRM	haploid-R1	P3	A10	YCR061W	RM	Haploid	Bad-var	2.934	2.923	0.0273	2.9791	2.9229	5.7824	1709	2.955	2.951	0.0423	3.0136	2.9508	5.8644	15657
Pilot_screen_BYxRM	haploid-R2	P9	I13,I14	YCR063W	BY	Haploid	OK	2.935	2.953	0.0192	2.9551	2.9532	4.8018	1871	2.958	2.954	0.0402	3.0016	2.954	5.3343	18666
Pilot_screen_BYxRM	haploid-R2	P9	I13,I14	YCR063W	RM	Haploid	OK	2.908	2.926	0.0208	2.9291	2.9257	4.768	1302	2.908	2.928	0.034	2.9423	2.9281	5.0453	12172
Pilot_screen_BYxRM	haploid-R1	P9	I13	YCR063W	BY	Haploid	OK	3.093	3.099	0.0144	3.1091	3.0992	5.1652	669	3.11	3.108	0.0268	3.142	3.1082	5.5738	6423
Pilot_screen_BYxRM	haploid-R1	P9	I13	YCR063W	RM	Haploid	OK	3.106	3.122	0.0251	3.1258	3.122	5.086	589	3.111	3.121	0.0258	3.1374	3.1215	5.3522	6132
Pilot_screen_BYxRM	haploid-R2	P3	B12	YCR065W	BY	Haploid	OK	2.978	2.99	0.046	3.0276	2.9897	5.4634	1039	3.001	3.024	0.0494	3.0528	3.0236	5.5109	10700
Pilot_screen_BYxRM	haploid-R2	P3	B12	YCR065W	RM	Haploid	OK	2.898	2.911	0.0576	2.9575	2.9111	5.3724	1002	2.933	2.958	0.0606	2.9955	2.9578	5.6079	9515
Pilot_screen_BYxRM	haploid-R1	P3	B12	YCR065W	BY	Haploid	OK	3.032	3.027	0.0235	3.0641	3.027	5.5675	760	3.041	3.03	0.0486	3.0996	3.0305	5.7719	8431
Pilot_screen_BYxRM	haploid-R1	P3	B12	YCR065W	RM	Haploid	OK	2.995	2.992	0.0207	3.0203	2.992	5.1934	861	3.003	3.011	0.0387	3.0466	3.0113	5.4317	7754
Pilot_screen_BYxRM	fillin	Haploid-fillin_P1	F14	YCR065W	BY	Haploid	NA	3.083	3.074	0.0318	3.1227	3.0736	5.6492	799	3.088	3.06	0.0609	3.162	3.0605	5.9683	7811
Pilot_screen_BYxRM	fillin	Haploid-fillin_P1	F14	YCR065W	RM	Haploid	NA	3.035	3.042	0.0216	3.06	3.0416	5.2365	1010	2.985	2.996	0.0385	3.0276	2.9956	5.387	6247
Pilot_screen_BYxRM	haploid-R2	P10	C11,C12	YCR067C	BY	Haploid	OK	2.792	2.815	0.0269	2.82	2.8146	4.7023	718	2.807	2.823	0.0591	2.8692	2.8226	5.213	7194
Pilot_screen_BYxRM	haploid-R2	P10	C11,C12	YCR067C	RM	Haploid	OK	2.778	2.791	0.0196	2.7984	2.7913	4.5205	2406	2.77	2.785	0.0372	2.8089	2.7846	4.8508	22753
Pilot_screen_BYxRM	haploid-R1	P10	C11	YCR067C	BY	Haploid	OK	3.066	3.064	0.0175	3.0886	3.0635	5.3895	1211	3.094	3.073	0.0408	3.1469	3.0725	5.8787	12703
Pilot_screen_BYxRM	haploid-R1	P10	C11	YCR067C	RM	Haploid	OK	3.05	3.052	0.0117	3.0636	3.0516	4.9877	1097	3.062	3.06	0.0277	3.0943	3.0597	5.4595	10246
Pilot_screen_BYxRM	fillin	Haploid-fillin_P1	F15	YCR067C	BY	Haploid	NA	3.131	3.131	0.016	3.1504	3.1311	5.3251	1055	3.123	3.111	0.0343	3.1647	3.1108	5.7236	8688
Pilot_screen_BYxRM	fillin	Haploid-fillin_P1	F15	YCR067C	RM	Haploid	NA	3.104	3.109	0.0142	3.1248	3.1087	5.7753	633	3.068	3.073	0.0249	3.0973	3.0728	5.4598	4065
Pilot_screen_BYxRM	haploid-R2	P11	E1,E2	YCR069W	BY	Haploid	Bad-count	2.894	2.84	0.0891	2.9991	2.8396	5.7706	33	2.942	2.953	0.0747	3.0193	2.9534	5.5877	557
Pilot_screen_BYxRM	haploid-R2	P11	E1,E2	YCR069W	RM	Haploid	Bad-count	2.691	2.725	0.0738	2.7631	2.7251	5.0043	64	2.702	2.714	0.0552	2.7686	2.7145	5.3908	558
Pilot_screen_BYxRM	haploid-R1	P11	E1	YCR069W	BY	Haploid	OK	2.984	2.979	0.0157	3.0044	2.979	5.1758	591	3.011	2.979	0.0501	3.0784	2.9795	5.8489	7035
Pilot_screen_BYxRM	haploid-R1	P11	E1	YCR069W	RM	Haploid	OK	2.901	2.908	0.02	2.923	2.9077	4.8544	797	2.934	2.936	0.0353	2.9731	2.9356	5.2625	6824
Pilot_screen_BYxRM	fillin	Haploid-fillin_P1	F16	YCR069W	BY	Haploid	NA	3.065	3.052	0.0251	3.0953	3.0523	5.427	830	3.052	3.02	0.0521	3.1174	3.0202	5.8467	8467
Pilot_screen_BYxRM	fillin	Haploid-fillin_P1	F16	YCR069W	RM	Haploid	NA	3.022	3.02	0.0235	3.049	3.0197	5.2315	921	2.967	2.967	0.0352	3.008	2.9671	5.3371	6164
Pilot_screen_BYxRM	haploid-R2	P9	D23,D24	YCR071C	BY	Haploid	OK	2.929	2.946	0.0186	2.9486	2.946	4.8113	2005	2.951	2.949	0.0382	2.9936	2.9491	5.3247	19962
Pilot_screen_BYxRM	haploid-R2	P9	D23,D24	YCR071C	RM	Haploid	OK	2.894	2.908	0.0296	2.9246	2.908	4.965	1518	2.921	2.934	0.0422	2.9638	2.9339	5.2076	14828
Pilot_screen_BYxRM	haploid-R1	P9	C24	YCR071C	BY	Haploid	OK	3.151	3.154	0.0133	3.1662	3.1545	5.1841	1967	3.159	3.156	0.0268	3.1902	3.156	5.6198	19437
Pilot_screen_BYxRM	haploid-R1	P9	C24	YCR071C	RM	Haploid	Bad-count	3.177	3.173	0.0315	3.2142	3.1734	5.689	11	3.251	3.319	0.0946	3.3327	3.3189	6.1086	272
Pilot_screen_BYxRM	fillin	Haploid-fillin_P1	F17	YCR071C	BY	Haploid	NA	3.253	3.251	0.0141	3.27	3.2509	5.4972	1354	3.231	3.216	0.0279	3.2668	3.2156	5.8842	10119
Pilot_screen_BYxRM	fillin	Haploid-fillin_P1	F17	YCR071C	RM	Haploid	NA	3.212	3.215	0.0115	3.2251	3.2153	5.2167	928	3.18	3.182	0.0223	3.2045	3.182	5.479	5319
Pilot_screen_BYxRM	haploid-R2	P6	B12	YCR073W-A	BY	Haploid	OK	3.097	3.1	0.0285	3.1299	3.1003	5.5472	750	3.132	3.114	0.0465	3.1945	3.1139	6.1383	7864
Pilot_screen_BYxRM	haploid-R2	P6	B12	YCR073W-A	RM	Haploid	OK	2.99	2.996	0.0463	3.0482	2.9965	5.9985	790	3.018	3.015	0.0463	3.0798	3.0155	6.2299	7203
Pilot_screen_BYxRM	haploid-R1	P6	B12	YCR073W-A	BY	Haploid	OK	3.023	3.024	0.0186	3.0453	3.0237	5.2198	1224	3.035	3.027	0.0378	3.0857	3.0268	5.8401	12021
Pilot_screen_BYxRM	haploid-R1	P6	B12	YCR073W-A	RM	Haploid	OK	2.983	2.98	0.0228	3.01	2.9803	5.2253	617	3.01	3.014	0.0313	3.0465	3.0142	5.3662	6410
Pilot_screen_BYxRM	fillin	Haploid-fillin_P1	F18	YCR073W-A	BY	Haploid	NA	3.179	3.147	0.0434	3.2418	3.1467	6.2117	1147	3.201	3.127	0.0892	3.3195	3.1275	6.5396	9977
Pilot_screen_BYxRM	fillin	Haploid-fillin_P1	F18	YCR073W-A	RM	Haploid	NA	3.036	3.033	0.0195	3.0613	3.0328	5.4609	1027	2.992	2.991	0.0345	3.0339	2.9915	5.5179	6727
Pilot_screen_BYxRM	haploid-R2	P2	F5,F6	YCR077C	BY	Haploid	OK	3.39	3.398	0.0262	3.4192	3.3984	6.0294	1534	3.414	3.409	0.0475	3.4661	3.4087	6.3625	15221
Pilot_screen_BYxRM	haploid-R2	P2	F5,F6	YCR077C	RM	Haploid	OK	3.314	3.328	0.0147	3.3296	3.3276	5.4604	1499	3.319	3.33	0.0274	3.3481	3.3303	5.7892	14332
Pilot_screen_BYxRM	haploid-R1	P2	E6	YCR077C	BY	Haploid	OK	3.323	3.325	0.0325	3.363	3.3251	6.1804	356	3.363	3.342	0.0607	3.4335	3.3425	6.5366	4810
Pilot_screen_BYxRM	haploid-R1	P2	E6	YCR077C	RM	Haploid	OK	3.276	3.294	0.015	3.2912	3.2945	5.3558	808	3.266	3.278	0.0313	3.2994	3.2785	5.837	6772
Pilot_screen_BYxRM	haploid-R2	P5	O05	YCR079W	BY	Haploid	OK	2.905	2.915	0.0217	2.9283	2.9149	4.8874	781	2.916	2.926	0.0272	2.9477	2.9259	5.2271	7900
Pilot_screen_BYxRM	haploid-R2	P5	O05	YCR079W	RM	Haploid	OK	2.797	2.803	0.042	2.8406	2.8035	4.9512	420	2.839	2.851	0.0426	2.8892	2.8514	5.4533	3948
Pilot_screen_BYxRM	haploid-R1	P5	O5	YCR079W	BY	Haploid	OK	2.967	2.967	0.0242	3.0023	2.9672	5.6909	359	3.074	3.021	0.0731	3.1691	3.0206	6.1532	4533
Pilot_screen_BYxRM	haploid-R1	P5	O5	YCR079W	RM	Haploid	OK	2.876	2.886	0.0252	2.9114	2.886	5.6821	930	2.873	2.879	0.0392	2.9198	2.8789	5.479	8345
Pilot_screen_BYxRM	haploid-R2	P1	O1,O2	YCR081W	BY	Haploid	OK	3.202	3.17	0.06	3.2776	3.1696	6.3308	633	3.197	3.18	0.0762	3.2909	3.1796	6.4564	6276
Pilot_screen_BYxRM	haploid-R2	P1	O1,O2	YCR081W	RM	Haploid	OK	3.114	3.094	0.0892	3.222	3.0941	6.3197	1216	3.123	3.11	0.1222	3.2785	3.1098	6.8756	11560
Pilot_screen_BYxRM	haploid-R1	P1	O1	YCR081W	BY	Haploid	OK	2.985	2.96	0.0473	3.051	2.9605	5.9644	772	3.008	2.982	0.0735	3.1113	2.9816	6.5381	8247
Pilot_screen_BYxRM	haploid-R1	P1	O1	YCR081W	RM	Haploid	OK	3.067	3.021	0.0908	3.1832	3.0214	6.2973	570	3.095	3.043	0.1225	3.279	3.0434	7.058	5131
Pilot_screen_BYxRM	haploid-R2	P9	J3,J4	YCR082W	BY	Haploid	OK	2.673	2.69	0.0204	2.6949	2.6906	4.3901	1596	2.676	2.685	0.0468	2.7273	2.6849	4.8753	15726
Pilot_screen_BYxRM	haploid-R2	P9	J3,J4	YCR082W	RM	Haploid	OK	2.643	2.662	0.0253	2.6691	2.6617	4.3826	1654	2.643	2.666	0.0399	2.6835	2.6657	4.6011	16198
Pilot_screen_BYxRM	haploid-R1	P9	I4	YCR082W	BY	Haploid	OK	2.934	2.938	0.0165	2.9563	2.9384	5.2049	1154	2.933	2.928	0.0308	2.9734	2.9276	5.4827	11353
Pilot_screen_BYxRM	haploid-R1	P9	I4	YCR082W	RM	Haploid	OK	2.914	2.916	0.0242	2.9493	2.9163	5.6766	488	2.935	2.94	0.0322	2.9741	2.9399	5.5245	5037
Pilot_screen_BYxRM	haploid-R2	P9	B3,B4	YCR083W	BY	Haploid	OK	2.815	2.818	0.0263	2.8455	2.8185	4.9365	1302	2.858	2.827	0.0753	2.9604	2.8274	6.0434	12897
Pilot_screen_BYxRM	haploid-R2	P9	B3,B4	YCR083W	RM	Haploid	OK	2.723	2.738	0.0217	2.7466	2.7381	4.5101	1739	2.735	2.745	0.0415	2.7805	2.7455	4.8987	17119
Pilot_screen_BYxRM	haploid-R1	P9	A4	YCR083W	BY	Haploid	OK	3.053	3.043	0.028	3.0865	3.0432	5.4832	1554	3.065	3.054	0.046	3.1224	3.0536	5.8415	15181
Pilot_screen_BYxRM	haploid-R1	P9	A4	YCR083W	RM	Haploid	OK	2.974	2.972	0.0239	3.0023	2.9722	5.1928	1220	3.003	3.006	0.0406	3.0502	3.0057	5.5179	12352
Pilot_screen_BYxRM	haploid-R2	P2	J15,J16	YCR084C	BY	Haploid	Bad-mean	3.467	3.492	0.0277	3.4954	3.4917	6.0603	1800	3.49	3.496	0.0567	3.5489	3.4963	6.5296	17979
Pilot_screen_BYxRM	haploid-R2	P2	J15,J16	YCR084C	RM	Haploid	Bad-mean	3.42	3.428	0.0161	3.438	3.4282	5.809	352	3.372	3.4	0.039	3.4125	3.4004	6.0512	3234
Pilot_screen_BYxRM	haploid-R1	P2	J16	YCR084C	BY	Haploid	Bad-count-mean	3.256	3.291	0.0294	3.2885	3.291	5.7279	111	3.271	3.281	0.0644	3.3436	3.2809	6.2558	1162
[truncated: 16,548 more rows]

## Sheet: Combined cytometry GFP
ORF	Plate	Well	average(BYxBY_10pct_log10_mean)	MSE(BYxBY_10pct_log10_mean)	average(BYxBY_10pct_log10_median)	MSE(BYxBY_10pct_log10_median)	average(BYxBY_10pct_log10_SD)	MSE(BYxBY_10pct_log10_SD)	average(BYxBY_10pct_linear_mean)	MSE(BYxBY_10pct_linear_mean)	average(BYxBY_10pct_linear_median)	MSE(BYxBY_10pct_linear_median)	average(BYxBY_10pct_linear_SD)	MSE(BYxBY_10pct_linear_SD)	BYxBY_10pct_linear_number_of_cells	average(BYxBY_all_log10_mean)	MSE(BYxBY_all_log10_mean)	average(BYxBY_all_log10_median)	MSE(BYxBY_all_log10_median)	average(BYxBY_all_log10_SD)	MSE(BYxBY_all_log10_SD)	average(BYxBY_all_linear_mean)	MSE(BYxBY_all_linear_mean)	average(BYxBY_all_linear_median)	MSE(BYxBY_all_linear_median)	average(BYxBY_all_linear_SD)	MSE(BYxBY_all_linear_SD)	BYxBY_all_linear_number_of_cells	average(RMxBY_10pct_log10_mean)	MSE(RMxBY_10pct_log10_mean)	average(RMxBY_10pct_log10_median)	MSE(RMxBY_10pct_log10_median)	average(RMxBY_10pct_log10_SD)	MSE(RMxBY_10pct_log10_SD)	average(RMxBY_10pct_linear_mean)	MSE(RMxBY_10pct_linear_mean)	average(RMxBY_10pct_linear_median)	MSE(RMxBY_10pct_linear_median)	average(RMxBY_10pct_linear_SD)	MSE(RMxBY_10pct_linear_SD)	RMxBY_10pct_linear_number_of_cells	average(RMxBY_all_log10_mean)	MSE(RMxBY_all_log10_mean)	average(RMxBY_all_log10_median)	MSE(RMxBY_all_log10_median)	average(RMxBY_all_log10_SD)	MSE(RMxBY_all_log10_SD)	average(RMxBY_all_linear_mean)	MSE(RMxBY_all_linear_mean)
YNL088W	P1	A3	3.2136	0.0186	3.2209	0.0189	0.0226	0.0084	1734.44	110.765	1663	72.2528	475070	287786	18661187	3.2365	0.0165	3.236	0.026	0.0392	0.0034	1899.23	65.223	1723.95	104.004	880515	41827.7	1826412723	3.2222	0.0383	3.234	0.0406	0.0254	0.003	1753.04	167.744	1722.42	161.516	299874	81206.9	21131142	3.2454	0.0416	3.2425	0.0496	0.0413	0.005	1942.58	193.729
YMR190C	P1	A5	3.0437	0.0287	3.0354	0.0264	0.0351	0.0062	1246.04	111.814	1086.23	65.527	581971	65435.6	2042961	3.0844	0.0194	3.0602	0.0302	0.0624	0.0009	1476.42	78.7678	1151.5	78.7471	1.16298e+06	38895.1	2039710663	3.005	0.0243	3.0162	0.0309	0.0268	0.0031	1073.93	69.7701	1041.72	75.1843	225810	14309.1	22421339	3.0344	0.0243	3.0291	0.034	0.0471	0.0029	1242.44	89.1818
YJL092W	P1	A6	3	0.061	3.0359	0.0329	0.0595	0.0291	1149.48	104.763	1088.56	82.5586	482831	8868.44	20271177	3.0333	0.0433	3.0592	0.0262	0.0845	0.0354	1316.15	48.2082	1148.57	69.8694	854913	120526	1983912707	3.012	0.0514	3.0408	0.041	0.0385	0.0093	1129.51	102.813	1104.3	104.535	230947	11701.2	19281264	3.0474	0.0465	3.0619	0.041	0.0585	0.0102	1293.64	104.87
YKL010C	P1	A7	3.2219	0.0229	3.2279	0.0229	0.0232	0.0088	1793.48	149.107	1691.1	89.3292	1.0068e+06	703690	17051001	3.2607	0.0087	3.2405	0.0215	0.0468	0.0012	2074.74	30.6534	1742.58	87.9535	1.58277e+06	48403.3	1672311498	3.2167	0.0012	3.2249	0.0082	0.0271	0.0006	1737.17	4.2004	1680.6	32.0577	361883	46481.7	13501407	3.2468	0.0045	3.2432	0.0003	0.0434	0.0034	1953.54	16.3058
YEL025C	P1	A8	3.014	0.047	3.0314	0.0244	0.0541	0.0202	1189.8	81.6458	1076.2	60.1892	622071	190198	18591210	3.0521	0.0311	3.0571	0.0231	0.0813	0.0241	1396.3	42.9782	1142.79	61.1105	1.11896e+06	171071	1828612663	2.9922	0.0469	3.0196	0.0285	0.0406	0.0097	1088.15	89.1101	1049	69.3941	262863	27218.1	18571264	3.0214	0.0439	3.04	0.0325	0.0645	0.015	1235.1	85.7793
YHR164C	P1	A9	3.0493	0.0263	3.0509	0.0189	0.0448	0.0063	1283.17	73.409	1125.82	49.1057	666071	105797	13811100	3.0951	0.0131	3.0842	0.0092	0.0722	0.01	1535.67	37.7129	1214.89	26.1143	1.68566e+06	418596	1358912681	3.0292	0.038	3.053	0.0259	0.0397	0.0095	1185.72	69.3994	1132.55	69.059	352847	11623	18581303	3.0585	0.0297	3.0701	0.0205	0.0611	0.0103	1342.51	70.9847
YPR010C	P1	A10	3.5394	0.0334	3.5839	0.0229	0.0484	0.0085	3795.03	229.699	3839.41	201.931	1.71797e+06	50102.1	19331242	3.5378	0.0418	3.5697	0.0337	0.0521	0.0093	3798.13	244.274	3721.63	288.421	2.16973e+06	429236	1879013249	3.6307	0.0222	3.6547	0.0209	0.0293	0.0023	4498.57	218.655	4524.07	222.603	1.25874e+06	120207	19781219	3.6268	0.0218	3.6454	0.0207	0.0472	0.0024	4643.01	185.098
YNR031C	P1	A11	3.0786	0.0396	3.1011	0.0291	0.0328	0.0046	1302.72	110.106	1264.91	85.1352	351153	108659	20991030	3.1101	0.0351	3.1178	0.0278	0.0592	0.0115	1505.35	96.7137	1313.76	83.4888	1.27433e+06	457180	2086212139	3.0712	0.0349	3.099	0.0233	0.0374	0.0088	1284.2	69.3659	1258.78	67.9996	275857	19406.3	18351306	3.1004	0.0335	3.1166	0.0212	0.0588	0.012	1458.33	76.0308
YFL008W	P1	A12	3.2417	0.0207	3.2535	0.0235	0.0253	0.0016	1846.9	78.4242	1795.31	98.235	400702	5554.37	20601100	3.2618	0.0118	3.2662	0.0162	0.0424	0.0018	2016.85	18.3658	1847.36	68.6676	970022	153031	2052512442	3.2428	0.0187	3.2563	0.0192	0.0269	0.0002	1840.27	71.6301	1806.84	80.8737	360608	21582.7	17541286	3.2719	0.0123	3.2741	0.0172	0.0426	0.0025	2053.61	51.5186
YCL014W	P1	A13	3.1262	0.0272	3.1337	0.0277	0.024	0.0021	1422.63	89.4113	1362.96	86.2231	351310	63105.7	1835882	3.1544	0.0224	3.1542	0.0292	0.0397	0.0003	1575.45	61.8889	1429.75	95.3045	698435	14681.1	1811410109	3.1376	0.0151	3.144	0.0216	0.027	0.0005	1450.42	43.897	1396.21	69.7542	337370	87845.9	18171358	3.1637	0.0158	3.1594	0.022	0.0427	0.0015	1612.63	48.3238
YGR090W	P1	A14	3.447	0.025	3.4631	0.0221	0.0212	0.0023	2898.31	140.912	2908.61	148.028	493989	74078.7	19031156	3.4567	0.0227	3.4655	0.0255	0.0312	0.0021	3020.88	103.454	2928.34	170.939	1.11762e+06	180458	1876212197	3.4709	0.012	3.4819	0.0144	0.0224	0.0039	3041.91	98.2149	3037.96	103.981	471109	38837.3	19511228	3.4733	0.0126	3.48	0.0148	0.0373	0.0053	3179.94	87.5725
YDR141C	P1	A15	3.2673	0.0303	3.2761	0.0341	0.0282	0	1980.33	121.244	1894.19	148.77	611892	59227.8	1851819	3.2912	0.0152	3.2855	0.0185	0.0465	0.0027	2199.85	46.5754	1931.76	80.3627	2.06771e+06	571823	183569797	3.2381	0.0273	3.25	0.0226	0.0267	0.0004	1833.35	116.926	1782.71	94.959	812655	285566	20391474	3.2641	0.0277	3.2616	0.0296	0.0429	0.0021	2037.49	131.394
YJL197W	P1	A16	3.1807	0.0547	3.1969	0.0389	0.0336	0.0042	1649.82	192.353	1580.35	140.89	475571	92657.6	1979893	3.2102	0.0482	3.2124	0.0354	0.0552	0.0088	1867.85	166.863	1637.11	133.276	1.12461e+06	36678.4	1913910786	3.2095	0.0161	3.2224	0.0184	0.025	0.0014	1690.96	63.9537	1671.82	72.7142	270228	16028.9	14801520	3.2381	0.0147	3.2379	0.0183	0.0417	0.0025	1900.01	57.9733
YFL033C	P1	A17	3.0522	0.0202	3.0644	0.0104	0.0387	0.0083	1252.53	39.9836	1161.31	28.125	534320	20276.7	1625914	3.0899	0.0009	3.0917	0.0023	0.0713	0.0158	1497.42	31.5493	1235.8	6.7099	1.23485e+06	82189.7	1609310605	3.0306	0.0202	3.0453	0.0221	0.0321	0.001	1167.59	63.1026	1112.03	56.1384	526890	328099	12911460	3.0701	0.0143	3.0729	0.0138	0.0526	0.0026	1358.39	53.0037
YMR076C	P1	A18	3.1359	0.0299	3.1662	0.0122	0.0446	0.0173	1507.04	44.1942	1467.02	41.7406	501524	200578	20251192	3.1606	0.0206	3.1813	0.0113	0.0639	0.0203	1673.41	0.3929	1517.86	39.0946	997863	256144	1993713045	3.1444	0.0132	3.1649	0.0114	0.0302	0.002	1484.06	31.8546	1462.99	40.2498	278026	15741.4	15701321	3.1712	0.0159	3.1809	0.0138	0.0494	0.0027	1668.07	41.7359
YLR422W	P1	A19	3.0618	0.0138	3.07	0.017	0.027	0.0007	1236.64	32.7153	1176.35	46.0324	296301	34373.2	13191155	3.1046	0.0094	3.0928	0.0088	0.056	0.007	1491.08	67.0382	1238.25	25.1428	1.02441e+06	220673	1315112622	3.0695	0.0045	3.0836	0.0079	0.0313	0.0023	1263.21	1.0876	1213.4	23.6901	318599	7442.85	11271322	3.1005	0.0029	3.0986	0.0089	0.0492	0.002	1432.73	5.6085
YDR217C	P1	A20	2.9899	0.0359	3.0223	0.0223	0.0495	0.0202	1093	50.6787	1054.03	54.0348	295295	23198.4	1519995	3.0228	0.0178	3.0478	0.0068	0.0777	0.0272	1284.95	6.1569	1117.07	18.0632	3.40213e+06	2.49765e+06	1501611121	3.0143	0.0413	3.0375	0.0337	0.0354	0.0054	1126.86	88.7053	1093.73	85.653	254571	16278.2	15891284	3.051	0.0362	3.0629	0.0324	0.0573	0.0088	1302.29	76.1087
YER172C	P1	A21	3.0922	0.0042	3.094	0.002	0.0398	0.0034	1389.78	5.5739	1241.45	4.6502	687063	128580	1672884	3.1278	0.0032	3.1135	0.0025	0.0653	0.0073	1624.43	28.2957	1298.76	6.9448	1.42205e+06	112918	166589942	3.0576	0.0233	3.0753	0.019	0.031	0.0022	1221.7	55.2218	1190.66	53.044	233492	3196.16	16111478	3.0856	0.0168	3.091	0.0166	0.0507	0.0025	1385.27	48.5585
YLR384C	P1	A22	3.4241	0.0009	3.4525	0.0065	0.0342	0.0017	2849.64	19.8168	2833.33	42.7118	898257	246728	1318999	3.4386	0.0016	3.4556	0.0046	0.0475	0.0008	3038.23	18.7974	2854.09	29.2132	1.8329e+06	324351	1302111402	3.4473	0.0085	3.4669	0.0139	0.0275	0.0017	2943.14	46.7646	2933.7	98.5111	712596	125943	13821394	3.4652	0.0007	3.47	0.0029	0.046	0.002	3223.32	18.5576
YIL129C	P1	A23	2.978	0.026	2.9882	0.0182	0.0473	0.0083	1101.36	62.6361	974.464	41.2101	638673	44517.5	12201166	3.0316	0.0036	3.0241	0.0041	0.0865	0.0226	1373.87	28.6205	1056.94	9.3282	1.29358e+06	171289	1229413227	2.9656	0.0366	2.9818	0.0306	0.0385	0.0022	1038.79	95.3536	961.952	68.8612	388239	151394	18721205	2.9973	0.0328	3.0049	0.0222	0.0641	0.0074	1210.39	106.552
YML049C	P1	A24	3.6506	0.0166	3.6987	0.0227	0.0475	0.0063	4864.2	222.256	5004.89	264.651	1.70707e+06	224009	17031079	3.6668	0.0238	3.6979	0.0269	0.0517	0.0028	5091.99	254.727	5000.97	308.517	3.2411e+06	341509	1687111669	3.6068	0.0199	3.6326	0.0129	0.031	0.0044	4282.34	175.019	4298.57	123.971	1.24251e+06	222809	1459983	3.6194	0.0126	3.6317	0.0092	0.0443	0.0054	4529.33	137.12
YOL089C	P1	B1	3.0754	0.0094	3.084	0.011	0.0217	0.007	1260.53	46.0244	1213.14	30.3692	301009	79189.7	15671352	3.1036	0.0166	3.1026	0.0206	0.0422	0.0075	1452.11	103.462	1268.76	59.5592	4.39171e+06	3.87885e+06	1561114394	3.0816	0.0099	3.084	0.0103	0.0279	0.0051	1295.07	67.4935	1214.57	28.5825	393047	219487	2020946	3.1029	0.0062	3.0972	0.0123	0.044	0.0052	1425.91	45.6782
YGL093W	P1	B2	3.0434	0.0144	3.0664	0.0044	0.0348	0.0065	1204.84	31.5658	1166.22	11.7025	363023	80730.1	13881252	3.0831	0.0121	3.0857	0.0077	0.0618	0.0116	1423.8	11.9152	1219.42	21.5806	869706	66130.9	1422414191	3.0875	0.0475	3.0988	0.044	0.0275	0.0017	1302.74	132.48	1262.28	125.853	246032	11676.1	10111230	3.1169	0.0487	3.1198	0.0482	0.044	0.0019	1465.39	158.511
YCL024W	P1	B3	2.999	0.009	3.0108	0.0148	0.0232	0.0049	1060.84	31.6424	1025.5	35.1226	193732	25542.2	17021213	3.0293	0.0017	3.0206	0.0166	0.0522	0.0006	1252.13	11.1491	1050.15	39.9646	795477	75687.5	1694313299	3.0001	0.0041	3.0109	0.0101	0.0279	0.0035	1065.38	27.4566	1026.81	24.3566	233252	76299.6	25251225	3.0352	0.0102	3.033	0.0178	0.0461	0.0038	1227.4	42.6826
YER032W	P1	B4	2.9982	0.0192	3.0218	0.0098	0.0408	0.0107	1098.59	31.9972	1051.63	24.3257	311032	22827.7	19471480	3.0193	0.0213	3.0368	0.0138	0.0661	0.0125	1240.95	42.8295	1090.05	34.4488	728076	41797.7	1932216222	3.002	0.006	3.0221	0.0038	0.0366	0.0062	1096.21	2.8918	1052.94	9.0288	244242	9075.35	17801308	3.0296	0.0101	3.0426	0.0044	0.0594	0.0082	1256.35	17.8003
YGR089W	P1	B6	3.1339	0.0049	3.1476	0.0036	0.0266	0.0024	1449.32	27.972	1404.43	11.9099	311172	99968.6	1914907	3.1581	0.0111	3.1631	0.0111	0.041	0.0051	1598.1	56.755	1456.29	38.213	665737	119099	1910810430	3.1365	0.0071	3.1499	0.0074	0.0268	0.0018	1442.34	17.3056	1413.82	23.9734	253165	7147.93	15171365	3.1658	0.0072	3.1686	0.0042	0.0428	0.0021	1617.73	26.4178
YLR039C	P1	B7	3.105	0.009	3.1131	0.0121	0.0193	0.0069	1334.68	47.6213	1297.68	34.9773	235491	123083	25421676	3.1205	0.0105	3.1187	0.0157	0.0386	0.0071	1467.13	57.1945	1315.24	47.5891	672564	141557	2525116651	3.1139	0.0038	3.1267	0.0014	0.0314	0.0016	1397.24	2.8407	1341.04	5.0412	331359	15233.3	1542730	3.1661	0.0229	3.1652	0.0124	0.0534	0.0008	1683.84	93.5837
YGL013C	P1	B9	3.0392	0.0332	3.0679	0.0109	0.0437	0.0141	1207.08	71.5488	1168.73	29.2697	305598	96380	9591145	3.0578	0.0318	3.0863	0.0083	0.0669	0.0187	1333.43	71.0164	1219.77	23.8605	645892	125417	951812983	3.0884	0.0099	3.1015	0.0083	0.0304	0.0016	1311.65	22.6314	1265.07	24.2178	305330	37123.1	18871444	3.1157	0.0143	3.1205	0.0117	0.0511	0.0035	1484.65	37.9907
YGR100W	P1	B10	3.1192	0.0342	3.1462	0.0202	0.0363	0.0116	1419.75	73.5823	1400.2	64.8359	274857	17625.6	23191425	3.1282	0.0322	3.1536	0.0176	0.0592	0.0177	1531.71	62.4465	1424.53	58.0631	836469	136466	2311015145	3.1323	0.0117	3.1528	0.0061	0.0319	0.004	1453.62	16.4803	1423.09	20.8991	320593	3467.83	13661000	3.1571	0.0167	3.169	0.0067	0.0535	0.0076	1629.13	28.6473
YFL034W	P1	B11	3.1	0.015	3.1126	0.0126	0.0276	0.0018	1362.04	56.7711	1297.03	38.3993	527204	115391	10521063	3.1057	0.0167	3.1151	0.0131	0.049	0.0034	1446.51	47.5664	1304.35	38.7419	743506	78233.3	1057711218	3.1138	0.0154	3.1214	0.0107	0.0305	0.0017	1395.98	61.401	1323.56	31.1123	382654	2264.61	1643946	3.1503	0.0069	3.1477	0.0041	0.047	0.001	1590.13	23.0505
YGL227W	P1	B12	3.0578	0.0178	3.0765	0.0145	0.0289	0.0025	1223.11	37.3387	1192.07	39.6831	251885	21516.3	21631294	3.0756	0.0196	3.0893	0.0133	0.0517	0.0056	1358.16	48.3717	1228.97	37.9997	861217	280052	2175114074	3.0609	0.0064	3.0705	0.0113	0.0286	0.0005	1222.99	18.8919	1177.72	31.9212	239865	6506.87	17501104	3.0968	0.0047	3.0948	0.008	0.0467	0.0002	1405.19	10.7232
YOL051W	P1	B13	3.1837	0.0043	3.1917	0.0063	0.0227	0.0055	1623.59	12.2008	1554.26	22.2629	513343	238933	16821094	3.1849	0.0071	3.1922	0.0078	0.0372	0.0051	1678.7	15.6357	1556.23	28.6638	709504	100248	1687112868	3.1781	0.0001	3.1906	0.0001	0.0275	0	1595.4	3.3214	1551.97	2.9017	407350	73803.5	15891462	3.2069	0.0012	3.2109	0.0018	0.0457	0.0009	1792.14	7.8873
YBR079C	P1	B14	4.0446	0.0036	4.0943	0.0123	0.0577	0.0086	12073.2	179.936	12427.7	352.379	8.08031e+06	3.4888e+06	20241243	4.0456	0.0076	4.0778	0.0078	0.0711	0.007	12567.3	304.16	11954.9	216.693	1.94053e+07	4.844e+06	1993813638	4.0747	0.0177	4.1268	0.0107	0.0497	0.0037	13101.2	546.661	13421.8	307.124	9.35287e+06	4.43621e+06	13011097	4.0697	0.0082	4.1148	0.0077	0.0706	0.0008	13405.6	399.279
YMR308C	P1	B15	3.5026	0.0256	3.5293	0.0283	0.0272	0.0032	3336.2	188.448	3389.7	222.324	732159	8390.43	1067777	3.5066	0.0186	3.5205	0.0205	0.0389	0.0046	3460.99	131.325	3319.64	155.906	1.60103e+06	75844.1	105879554	3.5399	0.0101	3.5628	0.0039	0.029	0.0009	3638.81	48.1222	3658.19	36.203	859158	157923	13001484	3.5495	0.0106	3.5622	0.0073	0.0447	0.0012	3856.64	49.7766
YOR160W	P1	B16	3.2363	0.0247	3.2458	0.0262	0.0288	0.0019	1858.7	96.0853	1764.13	107.413	632617	28389.9	1382714	3.2665	0.0135	3.2689	0.0151	0.0431	0.0042	2063.31	52.1283	1858.5	65.4776	1.33468e+06	15211.7	137557968	3.1931	0.0073	3.2041	0.0098	0.0273	0.0004	1646.98	21.7738	1602.21	37.1021	364179	63115	13901222	3.2163	0.0023	3.2156	0.0046	0.0456	0	1835.88	8.1338
YDL102W	P1	B17	3.2793	0.0163	3.2991	0.0141	0.0274	0.0003	2016.34	53.8853	1993.25	63.9507	469431	94206.9	14271177	3.2964	0.0154	3.3046	0.0136	0.0402	0.0016	2164.52	59.7767	2018.54	61.9472	933717	20866	1415412775	3.3011	0.0051	3.3164	0.0093	0.028	0.0014	2110.22	27.2141	2074.76	45.0969	451850	26288.4	13731074	3.3221	0.002	3.3293	0.0064	0.0445	0.0019	2315.33	0.7859
YBL085W	P1	B18	3.1473	0.0093	3.1567	0.0097	0.032	0.001	1518.19	31.2282	1434.43	31.2894	398116	40595.9	17191094	3.1718	0.0038	3.1731	0.0011	0.0496	0.0019	1690.85	27.4385	1490.73	3.7706	875819	69327.3	1707012568	3.1741	0.0146	3.1824	0.01	0.029	0.002	1598.31	51.617	1524.55	34.6111	541477	179999	16981037	3.203	0.0063	3.2024	0.0049	0.0495	0.0011	1810.58	25.5673
YOR109W	P1	B19	3.2943	0.0033	3.3161	0.0001	0.0279	0.0011	2090.14	10.446	2072.03	0.4914	482579	26227.2	1329845	3.3019	0.0109	3.3171	0.0001	0.048	0.003	2233.51	39.1946	2075.5	1.0685	1.13853e+06	97407.8	1332310245	3.3394	0.0419	3.3529	0.0398	0.0252	0.002	2287.03	217.401	2264.41	204.45	410410	68865.1	9621466	3.3561	0.0376	3.3613	0.0389	0.0395	0.0052	2470.37	199.311
YNR067C	P1	B21	2.9638	0.0318	3.0102	0.0042	0.0585	0.0286	1055.13	33.254	1024.76	10.1463	597376	276897	12001213	2.9943	0.0203	3.0276	0.0006	0.0831	0.0339	1195.23	5.3736	1065.45	0.817	728531	30745.5	1184412333	3.0304	0.0078	3.0434	0.0021	0.0323	0.0008	1157.91	25.7771	1106.77	4.6642	260620	19222.5	11831081	3.0544	0.0014	3.0621	0.0028	0.0509	0.0025	1287.51	10.6411
YDR495C	P1	B22	3.0857	0.0143	3.0964	0.0106	0.0298	0.0016	1327.16	35.8542	1249.17	29.6192	474165	36340.3	1535846	3.1065	0.0135	3.1093	0.0117	0.057	0.0001	1504.81	29.104	1287.47	34.7348	1.07672e+06	144970	1530810251	3.0892	0.0093	3.1025	0.0034	0.0283	0.0008	1303.7	24.5273	1266.69	8.8081	268003	31927.2	17751548	3.1217	0.0002	3.1234	0.0003	0.0488	0.0009	1498.05	6.84
YML104C	P1	B23	2.9668	0.0288	2.9922	0.0182	0.0536	0.014	1071.97	57.8247	983.487	41.1638	470269	63263.4	1028726	3.0235	0.0215	3.0236	0.0116	0.0908	0.0217	1358.55	39.9926	1055.86	27.6054	1.20844e+06	99537.1	100928306	3.0048	0.0133	3.0251	0.0117	0.0348	0.0018	1104.51	34.5902	1059.88	27.6873	266703	33060.3	17031483	3.0415	0.0199	3.0488	0.017	0.0539	0.0008	1271.74	50.7603
YGR188C	P1	B24	3.0068	0.0142	3.0152	0.0128	0.0491	0.0087	1168.88	46.7498	1036.48	31.1002	667341	170188	1585811	3.0443	0.0037	3.0406	0.0084	0.079	0.0084	1399.12	3.6899	1098.02	21.162	1.26826e+06	74812.5	156739767	3.0007	0.0432	3.0155	0.0398	0.034	0.0017	1098.62	93.5139	1041.24	94.0932	287796	50614.2	13821622	3.0323	0.043	3.0404	0.0407	0.055	0.0003	1255.27	109.422
YCR042C	P1	C1	2.9999	0.0281	3.0207	0.0233	0.0303	0.0019	1082.78	76.2615	1051.03	55.8457	252346	18923	11091622	3.038	0.042	3.0424	0.0276	0.0608	0.0103	1300.34	157.805	1105.24	69.3875	859784	290222	1105117247	2.9977	0.0036	3.0319	0.0166	0.0437	0.013	1113.9	28.996	1077.57	39.8594	369964	30512.1	1574887	3.0295	0.0073	3.0478	0.0065	0.0642	0.0143	1282.29	12.6644
YER129W	P1	C2	3.0674	0.0126	3.0834	0.0056	0.0223	0.0023	1227.48	36.67	1211.61	15.5476	162214	4587.52	8861366	3.093	0.012	3.0992	0.0068	0.0454	0.0004	1392.54	41.6234	1256.82	18.7347	586639	33229.9	887714460	3.0781	0.0186	3.0856	0.0105	0.0304	0.0025	1287.01	74.66	1218.88	29.4955	298725	81220.5	14011172	3.1097	0.0215	3.1059	0.0144	0.0483	0.0006	1460.09	79.3492
YBL105C	P1	C4	3.2526	0.0056	3.2625	0.0065	0.022	0.0031	1875.74	22.2067	1830.03	26.1788	380240	13717.9	19281275	3.2687	0.0007	3.2732	0.0032	0.0318	0.0057	1987.45	0.0181	1875.41	13.7537	698716	56323.9	1927213649	3.2414	0.0163	3.2491	0.0197	0.025	0.0019	1821.62	70.9534	1778.61	83.2788	345566	14450.5	1959834	3.2588	0.015	3.2602	0.0205	0.0395	0.0037	1976.83	63.8036
YGR116W	P1	C5	3.4285	0.0165	3.451	0.016	0.0254	0.0033	2807.37	97.1828	2827.28	104.574	539707	20953.4	24481260	3.4394	0.0194	3.4497	0.0147	0.0368	0.0013	2945.53	91.8894	2818.01	95.3047	1.21939e+06	67676.9	2431613828	3.4545	0.0006	3.4738	0.0004	0.0256	0.0029	2960.54	1.506	2979.54	5.214	583424	79708.6	1865985	3.4666	0.0031	3.4752	0.0072	0.0392	0.0057	3147.86	24.2825
YLR272C	P1	C6	3.0197	0.0257	3.0489	0.0179	0.038	0.009	1144.65	48.6801	1120.22	45.4896	273942	33228.5	21251125	3.0486	0.0236	3.0666	0.0156	0.0564	0.0092	1282.95	50.6974	1166.55	42.4632	554236	32921.4	2087311560	3.0326	0.0327	3.0598	0.0191	0.0385	0.0094	1182.71	56.4353	1149.72	51.8835	275690	10086.6	1902923	3.0678	0.0261	3.0829	0.0152	0.0624	0.0144	1363.62	34.8898
YGL197W	P1	C7	3.0747	0.0023	3.0915	0.0035	0.0339	0.0032	1297.53	7.1364	1234.01	10.5004	418784	100877	1913844	3.1111	0.0019	3.1174	0.0076	0.0574	0.0062	1501.89	14.4584	1310.45	21.8405	975773	100789	190069566	3.0583	0.0144	3.0764	0.011	0.0297	0.0005	1219.62	44.1786	1192.94	29.4358	224612	592.561	17381276	3.0838	0.0203	3.0888	0.021	0.049	0.0014	1372.2	66.439
YJL076W	P1	C8	3.323	0.012	3.3412	0.0162	0.0234	0.0031	2202.34	51.0425	2194.64	81.6344	440563	57517.8	20431017	3.3434	0.0064	3.3486	0.0106	0.0357	0.0029	2376.63	9.6222	2232.76	53.0394	988102	143777	2032011746	3.3652	0.0041	3.3798	0.0085	0.0252	0.0014	2413.11	16.9079	2399.71	49.5053	445648	49364.3	17091042	3.3833	0.0017	3.3877	0.0066	0.0403	0.0037	2621.19	2.1254
YGL173C	P1	C9	3.6464	0.0104	3.6656	0.0126	0.0294	0.0065	4665.04	123.529	4636.1	136.231	1.64779e+06	7220.72	18321002	3.6521	0.0091	3.6644	0.0104	0.0416	0.0044	4832.21	62.4088	4620.42	115.367	2.82914e+06	460894	1831011336	3.6161	0.0028	3.6306	0.0003	0.0284	0.0005	4324.48	4.4718	4276.7	4.989	1.15653e+06	182645	16111026	3.6242	0.0022	3.6331	0.0031	0.0445	0.0034	4583.95	61.612
YPR122W	P1	C10	3.0695	0.0205	3.085	0.018	0.0328	0.0057	1277.27	37.9038	1216.41	50.9389	487111	142540	20771118	3.0921	0.0151	3.101	0.012	0.051	0.0046	1408.08	34.0426	1261.41	35.1053	713523	25061.7	2060712052	3.0754	0.0171	3.0883	0.0204	0.0301	0.0007	1277.48	43.8957	1227.92	58.7976	334195	15025.7	19031062	3.1068	0.0175	3.1071	0.0213	0.0475	0.0003	1440.88	54.7377
YJR138W	P1	C11	3.0319	0.0229	3.0484	0.0184	0.0337	0	1200.04	87.0269	1118.24	47.4656	767400	432126	1662729	3.0612	0.0132	3.0549	0.0079	0.0595	0.0041	1446.07	147.694	1134.42	20.3796	3.55442e+06	2.82681e+06	165988797	2.9944	0.0243	3.0362	0.0036	0.0548	0.0166	1250.02	114.959	1086.87	8.2629	2.42717e+06	1.92313e+06	19701436	3.041	0.0234	3.0664	0.0023	0.0776	0.0218	1413.67	104.102
YCR033W	P1	C12	3.0459	0.0089	3.0629	0.0119	0.0283	0.0007	1214.24	38.5322	1155.93	31.8471	812955	565041	18871242	3.0683	0.0047	3.0756	0.0016	0.0457	0.004	1318.45	29.58	1189.48	3.7098	821284	185660	1886213194	3.056	0.0004	3.0681	0.0031	0.029	0.0007	1210.53	5.9233	1170.47	8.3945	220905	9718.65	11621137	3.0916	0.0004	3.0972	0.0018	0.0479	0.0013	1390.85	3.6137
YJR140C	P1	C13	3.027	0.006	3.0474	0.0044	0.0265	0.0024	1152.18	35.836	1115.39	11.3099	489663	317278	1868988	3.0447	0.0047	3.0549	0.0029	0.0444	0.0056	1257.21	45.7738	1134.38	7.1813	749588	385086	1862511534	3.0453	0.0082	3.0585	0.0075	0.0313	0.0008	1205.45	16.9594	1145.52	19.1531	502210	215577	18361357	3.075	0.0049	3.0787	0.0052	0.0524	0.0032	1372.83	16.5793
YNL273W	P1	C14	3.04	0.008	3.0579	0.0031	0.0353	0.0089	1190.03	48.7681	1142.81	7.7286	292750	80157	16801325	3.0547	0.0183	3.0658	0.0122	0.0515	0.0055	1292.7	70.3115	1165.15	32.6894	617421	82259.9	1670213831	3.0291	0.0168	3.0467	0.0187	0.035	0.0046	1169.59	23.9004	1114.65	47.8253	346411	66208.1	1878935	3.0697	0.0195	3.0753	0.019	0.0554	0.005	1360.01	49.8774
YGL133W	P1	C16	3.1056	0.0156	3.1171	0.0181	0.0222	0.0042	1345.45	54.8252	1311.66	55.0549	243887	65976.7	1643772	3.1369	0.0159	3.1334	0.0174	0.04	0.0079	1530.59	81.8184	1359.21	54.2399	741798	174645	162368823	3.1197	0	3.1339	0.0057	0.0253	0.0025	1376.54	12.4528	1362.2	18.4071	206905	30213.6	16331275	3.1494	0.0006	3.1481	0.0068	0.0407	0.0048	1550.79	15.2874
YBR208C	P1	C17	3.0453	0.0063	3.0819	0.0171	0.0633	0.0265	1320.42	11.539	1208.6	48.0076	1.5956e+06	987741	19291099	3.0937	0.0073	3.1081	0.0249	0.085	0.024	1595.75	21.5855	1285	74.5642	4.37771e+06	2.62787e+06	1914212095	3.0622	0.0134	3.0711	0.0202	0.0406	0.0009	1364.05	37.8835	1179.94	54.8184	2.10184e+06	1.69447e+06	17501015	3.1037	0.0107	3.1007	0.0158	0.0617	0.0037	1564.06	13.066
YMR012W	P1	C18	3.8273	0.0153	3.8336	0.0186	0.0224	0.0067	6927.27	199.053	6822.51	289.699	2.25116e+06	845551	1266744	3.8355	0.0085	3.8387	0.0087	0.0334	0.0085	7218.61	91.7183	6899.5	137.118	4.8262e+06	1.02035e+06	126018108	3.7966	0.0185	3.8208	0.0148	0.0296	0.0016	6572.46	222.798	6629.27	237.677	2.13257e+06	546710	1560881	3.8032	0.0129	3.8218	0.0127	0.0467	0.0037	6898.68	131.239
YNL271C	P1	C19	3.1074	0.0024	3.125	0.003	0.0292	0.003	1372.5	4.0785	1332.63	8.8969	309056	31276.4	1857791	3.1323	0.0053	3.1438	0.0022	0.0524	0.0066	1542.59	1.9543	1393.34	6.5719	769256	1292.51	183239226	3.1144	0.0005	3.1281	0.002	0.0287	0.0018	1379.85	15.4778	1344.08	6.05	260504	22655.5	18201257	3.1386	0.0028	3.1448	0.006	0.0489	0.0031	1546.59	29.4598
YNL250W	P1	C20	3.0601	0.0081	3.0734	0.0084	0.035	0.004	1260.5	14.8357	1184.06	23.4122	390543	36626.8	1513724	3.0958	0.0062	3.0912	0.0002	0.0557	0.0038	1453.89	35.1271	1233.85	0.459	895263	135835	148858500	3.0468	0.0029	3.0662	0.0047	0.0319	0.0035	1199	26.4043	1164.97	11.7596	291295	52714.1	17181158	3.0797	0.0086	3.0835	0.0072	0.0508	0.0019	1370.26	34.6656
YER155C	P1	C21	3.2484	0.0016	3.2665	0.0005	0.0262	0.0014	1873.99	16.6102	1847.61	2.1647	478120	149360	2013600	3.2701	0.0019	3.2762	0.0012	0.0368	0.004	2024.62	11.9498	1888.88	6.9649	935032	42343.1	199606828	3.2552	0.0024	3.27	0.0021	0.0294	0.0023	1909.84	36.8043	1862.22	7.3513	442394	120448	13661134	3.2811	0.0083	3.2856	0.0105	0.0455	0	2119.87	53.8533
YFL036W	P1	C22	3.8214	0.0036	3.8937	0.0077	0.0754	0.0023	7540.84	3.1267	7831.72	136.875	4.94327e+06	1.96708e+06	1668998	3.8211	0.0001	3.8751	0.0041	0.0795	0.0016	7705.88	3.9391	7499.54	65.931	9.80716e+06	2.58366e+06	1639510942	3.8823	0.0041	3.9249	0.0004	0.0397	0.0048	8251.24	47.5991	8427.61	21.1492	4.00242e+06	1.14556e+06	1522879	3.8683	0.0132	3.9089	0.0044	0.0631	0.0076	8425.37	178.805
YHR165C	P1	C23	3.0997	0.0013	3.111	0.001	0.0274	0.0008	1346.24	8.9515	1290.99	3.3386	396155	110020	2083720	3.121	0.004	3.122	0.002	0.048	0.0006	1504.79	13.3045	1324.72	5.4285	886437	22847.5	206778735	3.0903	0.0051	3.1005	0.0083	0.0279	0.0005	1307.95	16.9317	1260.85	24.434	306347	55839.6	16791144	3.1194	0.0059	3.1186	0.0088	0.0463	0.0001	1477.94	15.129
YOR336W	P1	C24	2.9726	0.0154	2.9897	0.0033	0.0453	0.0123	1071.61	66.2746	975.962	7.823	536097	69522.6	1313705	3.0142	0.0258	3.0157	0.0203	0.0699	0.0055	1264.69	71.5934	1038.4	48.5298	860916	104468	131408006	2.9587	0.0163	2.9794	0.0204	0.0362	0.0054	990.677	21.776	955.282	44.6263	216839	26049.1	13891003	3.0014	0.0136	3.0097	0.0184	0.0565	0.0056	1166.03	22.0989
YGR258C	P1	D1	3.0375	0.0065	3.0518	0.0032	0.0268	0.0002	1167.88	24.7382	1127.22	9.0983	324477	62424.5	8411171	3.0451	0.0011	3.0589	0.0019	0.0501	0.0036	1256.64	5.4795	1145.47	4.1729	509596	19093.1	838712413	3.0433	0.0256	3.0556	0.0269	0.0354	0	1297.66	9.5001	1139.5	70.9031	2.75182e+06	2.23123e+06	1630726	3.0706	0.0196	3.0736	0.0209	0.0528	0.0023	1372.47	52.715
YDR103W	P1	D2	3.0993	0.0227	3.111	0.014	0.0311	0.0056	1357.9	99.2322	1293.03	41.7219	341021	133330	464894	3.1114	0.0206	3.1269	0.0221	0.0471	0.0031	1451.16	82.7463	1340.21	68.759	645725	71903.6	465810451	3.1069	0.029	3.121	0.0267	0.0306	0.0033	1372.27	111.878	1324.71	81.5595	315377	109320	1894944	3.1345	0.0311	3.1388	0.0283	0.0476	0.0025	1537.02	128.336
YPL009C	P1	D3	3.3956	0.0024	3.4134	0.0014	0.0224	0.007	2604.35	10.7724	2592.25	7.6055	675686	250284	1365691	3.3984	0.0004	3.4081	0.0031	0.033	0.0052	2663.21	11.6473	2559.09	18.1194	915531	37704.1	135717791	3.3889	0.0001	3.4031	0.0007	0.0268	0.0028	2607.05	52.6478	2532.99	8.2444	1.8123e+06	1.29696e+06	1817517	3.3998	0.0005	3.4068	0.0075	0.0436	0.0038	2760.39	2.0049
YDR081C	P1	D4	3.0632	0.0168	3.0854	0.0196	0.0381	0.0104	1263.76	74.0655	1217.95	54.6699	309056	60176.8	13831092	3.0843	0.0197	3.0955	0.0255	0.0562	0.0077	1400.71	82.4875	1248.05	73.2464	727345	130878	1385412537	3.0867	0.0311	3.0968	0.0295	0.0301	0.0005	1313.91	100.756	1252.68	84.5106	353255	78402.7	16381039	3.1077	0.0271	3.1102	0.0273	0.0487	0.002	1451.52	100.469
YDL223C	P1	D5	3.0555	0.0335	3.0534	0.0174	0.0426	0.006	1325.32	172.931	1131.53	45.8502	797199	522789	1597797	3.0973	0.0653	3.0647	0.0237	0.0853	0.0229	1859.82	578.371	1163.25	63.2361	4.55492e+06	3.35403e+06	160128586	2.9923	0.0085	3.0285	0.0248	0.047	0.0151	1118.05	71.964	1070.32	59.6874	420358	129262	1579876	3.0242	0.0083	3.0465	0.027	0.0726	0.02	1277.6	65.6903
YLR409C	P1	D6	3.3523	0.0017	3.3833	0.0073	0.0282	0.0054	2385.37	0.7888	2417.53	41.7805	507100	32534.9	1112589	3.3623	0.0093	3.3819	0.0099	0.0413	0.0023	2518.93	39.7989	2411.21	55.0721	1.29653e+06	145463	111505854	3.3455	0.0665	3.3815	0.0549	0.0321	0.0056	2406.71	320.566	2427.88	301.427	748886	124254	2387113	3.3388	0.066	3.3534	0.0631	0.0498	0.0076	2497.99	309.139
YJL098W	P1	D7	3.2227	0.0107	3.2379	0.0109	0.0226	0.0033	1749.53	41.8786	1730.78	43.0626	288053	38937.5	1734959	3.232	0.009	3.2414	0.0124	0.0388	0.0005	1860.51	14.6408	1743.48	49.5373	755333	135713	1738710539	3.2485	0.0033	3.2651	0.0037	0.0269	0.0004	1862.21	5.4617	1842.57	17.2507	341529	30850.4	1805768	3.2672	0.0104	3.2765	0.01	0.0477	0.0023	2059.23	18.2691
YDR356W	P1	D8	3.0807	0.0113	3.0995	0.0125	0.0275	0.0018	1283.3	41.9519	1256.7	36.3015	232460	10313.1	22491504	3.1045	0.0105	3.1133	0.0117	0.0442	0.0006	1429.76	26.7064	1298.44	33.8546	1.0382e+06	440059	2232315411	3.1085	0.015	3.1171	0.017	0.0287	0.0015	1364.97	36.5676	1310.73	50.327	294003	29476.1	1769536	3.1361	0.0137	3.1354	0.0126	0.0438	0.0039	1525.34	31.632
YHR154W	P1	D9	3.1081	0.0121	3.1256	0.0156	0.0253	0.0036	1364.44	47.3942	1336.59	48.9311	273625	84608	1680670	3.1194	0.0094	3.1278	0.0138	0.0448	0.0021	1474.24	35.4436	1342.01	42.1439	603405	76418.1	168107112	3.1197	0.002	3.1276	0.0023	0.0296	0.0027	1411.02	20.9499	1342.69	8.7843	350062	77514.6	1915473	3.1529	0.0133	3.1585	0.021	0.0469	0.0028	1597.63	55.5548
YDR421W	P1	D10	2.9867	0.0037	3.0037	0.0037	0.0335	0.0029	1059.91	7.2203	1009.59	8.6717	291187	57787.2	22301099	3.0064	0.0016	3.0149	0.0001	0.0567	0.0057	1180.71	12.7307	1035.02	0.8314	608546	990.426	2216111251	2.9985	0.0138	3.0154	0.0117	0.0316	0.0007	1072.4	31.8407	1037.89	27.2623	214162	21338.6	1812511	3.0463	0.0066	3.0483	0.0022	0.0493	0.0019	1266.78	8.0121
YPR042C	P1	D11	3.201	0.024	3.2209	0.0199	0.0293	0.0027	1695.06	75.8593	1665.17	77.725	394285	10570.3	2046619	3.2111	0.0191	3.2223	0.0183	0.045	0.0063	1796.52	30.0765	1670.92	71.3641	822844	86022	204146827	3.2314	0.0234	3.2434	0.0238	0.0288	0.0022	1809.46	122.551	1755.84	94.1597	387577	117596	1292536	3.2532	0.0232	3.2576	0.027	0.0459	0.0007	1989.27	121.757
YBR073W	P1	D12	3.0722	0.0002	3.093	0.005	0.0269	0.0001	1259.06	3.9304	1238.25	13.635	234971	2750.91	19581100	3.095	0.001	3.106	0.007	0.0457	0.001	1392.11	15.8813	1275.99	20.5341	596240	12595.9	1959511186	3.1018	0.0064	3.1146	0.0049	0.0336	0.0012	1367.89	6.2274	1304.01	13.5724	328144	63133.4	1684378	3.1419	0.0032	3.141	0.0016	0.0493	0.0026	1584.54	10.8454
YLR071C	P1	D13	3.1489	0.0169	3.1622	0.0152	0.0266	0.0019	1490.6	46.4941	1452.86	51.0162	277263	14211	2364817	3.1588	0.0168	3.1708	0.0178	0.0432	0.0048	1587.4	24.6109	1483.62	61.2931	606914	92283.7	237708841	3.1694	0.0008	3.1775	0.0007	0.0263	0.002	1555.33	16.1498	1505.27	3.3237	338818	102166	1050613	3.1937	0.0011	3.1938	0.0028	0.0431	0.0019	1729.93	3.7192
YBR112C	P1	D14	3.4153	0.0143	3.432	0.016	0.0219	0.0043	2709.01	80.5633	2707.78	99.8253	591055	77135.4	14751006	3.4258	0.0188	3.4397	0.0227	0.0335	0.0043	2838.41	95.5772	2756.2	143.435	1.11319e+06	6316.08	148349879	3.4056	0.0936	3.4257	0.0885	0.0319	0.0103	2781.11	489.206	2721.49	545.328	807326	9020.43	1847,95	3.4067	0.0987	3.4068	0.1071	0.0469	0.0145	2979.37	451.335
YPL160W	P1	D15	4.0712	0.0188	4.1314	0.0026	0.0711	0.0156	13154.5	260.804	13529.7	91.0064	1.08052e+07	5.09493e+06	1644870	4.0634	0.0136	4.1105	0.0035	0.0832	0.0108	13419.1	120.301	12896.4	111.328	2.44341e+07	6.68304e+06	1631510104	4.063	0.0309	4.1214	0.0121	0.0517	0.0062	12827.3	501.491	13259.1	384.587	9.25094e+06	4.38213e+06	14631038	4.0489	0.0259	4.1047	0.0138	0.0768	0.0064	12897.1	440.389
YNL236W	P1	D16	3.1365	0.0045	3.1446	0.0066	0.0235	0.0035	1454.92	28.9804	1395.18	20.5023	389605	166402	18551354	3.1633	0.0007	3.162	0.004	0.0424	0.0033	1635.13	10.3313	1453.55	13.0901	978719	190041	1839214006	3.1632	0.01	3.1538	0.0003	0.0336	0.0091	1654.95	161.876	1424.75	2.0116	1.08423e+06	798177	1815432	3.1886	0.01	3.1771	0.0062	0.05	0.0093	1833.75	158.758
YML100W	P1	D17	3.8289	0.0371	3.8445	0.0415	0.048	0.0017	7407.2	685.622	7024.44	672.177	6.26752e+06	3.64993e+06	1291987	3.8381	0.0289	3.8459	0.0341	0.0562	0.0018	7769.37	582.813	7035.91	546.373	1.28705e+07	5.33075e+06	1276310705	3.6886	0.0435	3.7	0.0456	0.0385	0.0016	5425.28	547.034	5041.86	522.638	3.82035e+06	1.52809e+06	1747939	3.699	0.0456	3.7033	0.0495	0.0575	0	5785.71	647.61
YOR346W	P1	D18	2.9823	0.0147	3.0007	0.0143	0.0377	0.0026	1070.4	25.8291	1001.84	32.3523	393418	121399	14681105	3.0174	0.0246	3.0202	0.0228	0.06	0.0029	1237.78	57.6042	1050.05	55.0462	770624	36617.7	1466211655	2.9971	0.0066	3.0076	0.0059	0.0335	0.0012	1093.05	6.5628	1018.31	13.0546	437976	211393	1448891	3.026	0.0092	3.0269	0.0074	0.0529	0.0021	1239.34	3.4332
YBR059C	P1	D19	3.2494	0.0056	3.2639	0.0009	0.0265	0.0007	1888.06	35.0336	1835.92	3.6019	539118	54353.3	1586979	3.2731	0.0059	3.2772	0.0028	0.0408	0.0005	2060.32	55.6018	1894.42	13.2369	999236	192829	1561410617	3.2321	0.0026	3.2458	0.0009	0.0264	0.0008	1789.17	15.5567	1762.35	5.9871	369252	76851.2	1804879	3.2524	0.0063	3.2532	0.0027	0.0429	0.0018	1970.36	36.0125
YPL040C	P1	D20	3.0413	0.0063	3.0549	0.0069	0.0274	0.0012	1179.95	19.5675	1134.46	18.3668	281393	51302.3	1530965	3.0656	0.0056	3.0665	0.0045	0.0519	0.0017	1348.54	34.5216	1166.6	12.0814	941945	305296	1519711510	3.057	0.0073	3.0778	0.0069	0.0336	0.0041	1226.03	10.3814	1196.95	19.1603	239255	22225.1	14881145	3.0986	0.0019	3.1044	0.0004	0.0515	0.0032	1427.07	2.0778
YBL101C	P1	D21	3.156	0.016	3.1711	0.0139	0.03	0.0014	1543.92	65.242	1484.13	47.3121	489626	55002.5	1653845	3.181	0.013	3.182	0.015	0.0487	0	1728.52	50.5749	1521.51	52.1105	1.08061e+06	102429	1642310072	3.1341	0.0037	3.148	0.0026	0.0277	0.0014	1444.6	4.3867	1406.65	7.2007	366450	77066.8	17871235	3.1574	0.0073	3.1581	0.0051	0.0456	0.0012	1606.86	24.6847
YPL183C	P1	D22	3.2073	0.0227	3.2163	0.0167	0.0265	0.0003	1713.95	104.075	1646.06	63.9536	395816	80395.8	12571119	3.2323	0.0327	3.239	0.028	0.0409	0.0035	1889.62	134.8	1737.75	111.522	865689	39001.8	1254811929	3.2449	0.0252	3.2546	0.0205	0.0262	0.002	1847.93	99.5843	1800.01	84.6861	380724	2011.35	16821151	3.2653	0.0297	3.27	0.0261	0.0448	0.0036	2051.34	125.633
YPL115C	P1	D23	3.1039	0.0059	3.1166	0.0136	0.0289	0	1368.11	13.2277	1309.45	41.2186	372336	4540.99	1536877	3.1346	0.0096	3.1343	0.0103	0.0484	0.0025	1554.02	45.6738	1363.04	32.8919	841424	83021	1514310419	3.1486	0.0085	3.1625	0.0056	0.027	0.0014	1486.3	20.4188	1453.98	17.3517	330344	74954.5	14551221	3.1621	0.0063	3.1681	0.0047	0.0449	0.001	1617.06	27.7858
YEL055C	P1	D24	3.1947	0.0163	3.2173	0.0137	0.0336	0.0065	1704.6	25.217	1650.2	50.7811	498012	138594	755664	3.2326	0.0024	3.2408	0.0028	0.0463	0.0077	1918.96	21.8144	1742.61	11.6016	958667	124601	78108556	3.247	0.004	3.2646	0.0016	0.0276	0.0018	1861.04	11.4317	1841.13	4.3147	372528	15050.5	1784992	3.2523	0.0204	3.2614	0.0146	0.0438	0.0055	1978.89	69.9321
YJR031C	P1	E1	3.0943	0.0157	3.1145	0.0165	0.0299	0.0024	1338.84	61.7118	1301.96	49.492	548033	253092	6901004	3.1317	0.0213	3.1335	0.0185	0.0437	0.0034	1521.63	68.7515	1361.77	57.2911	862236	150742	692611223	3.1271	0.0501	3.1429	0.0476	0.028	0.0012	1429.9	162.807	1398.57	151.542	289161	51578.3	14361019	3.1513	0.0441	3.155	0.0427	0.0462	0.0017	1600.4	153.689
YDR507C	P1	E2	3.2111	0.0109	3.2213	0.0067	0.0252	0.0066	1728.15	26.5378	1664.03	25.2441	421985	36151.5	898698	3.2294	0.0026	3.2332	0.0002	0.0415	0.0063	1876.02	7.4943	1711.09	0.8921	784781	62344.4	87808478	3.2194	0.0162	3.2342	0.0088	0.0261	0.0028	1741.98	53.9568	1715.32	33.5873	325175	2625.68	16161352	3.24	0.0224	3.2438	0.0179	0.0437	0.0039	1929.13	89.2762
YMR280C	P1	E3	2.9971	0.0109	3.0112	0.0118	0.0281	0.0015	1069.7	19.7269	1027.59	28.0131	225604	45716.5	1005828	3.0191	0.0099	3.0188	0.0162	0.053	0.0064	1223.24	13.7567	1045.14	39.5408	647273	151823	101209756	3.0167	0.0301	3.0232	0.0195	0.0357	0.0061	1154.42	118.675	1056.7	46.0671	436368	228518	15031115	3.0479	0.033	3.0479	0.0246	0.0553	0.0078	1304.03	133.996
YLR035C-A	P1	E4	3.0011	0.0169	3.0192	0.0138	0.0267	0.0012	1071.2	40.2774	1045.69	34.0041	179239	22346.8	12401206	3.0316	0.0104	3.0381	0.0089	0.0503	0.0033	1236.74	9.4977	1092.05	23.0171	584118	89124	1253712828	3.0014	0.007	3.0183	0.0117	0.0341	0.001	1093.78	13.8963	1043.58	27.5496	280692	62335.6	1585855	3.0265	0.0087	3.0355	0.0074	0.0565	0.0028	1238.23	21.6657
YEL022W	P1	E5	3.3093	0.0127	3.3261	0.0069	0.0207	0.0053	2121.12	60.1059	2119.15	34.1297	305311	28422.9	838726	3.3285	0.0145	3.3337	0.0083	0.0328	0.0052	2287.98	78.4882	2155.7	41.6575	1.45215e+06	606872	85048075	3.2992	0.0099	3.2966	0.0021	0.0285	0.0061	2130.54	110.821	1982.38	10.4966	665172	327122	1337664	3.3335	0.0068	3.324	0.0041	0.0424	0.0096	2397.35	109.757
YPR049C	P1	E6	2.9857	0.0027	3.0062	0.0032	0.0311	0.0014	1050.22	7.1816	1014.6	7.4404	273167	66248.3	1316939	3.0242	0.0132	3.0225	0.0045	0.0552	0.0025	1241.93	64.5996	1054.27	10.7477	652218	148369	1321210072	2.9884	0.0066	3.0028	0.0049	0.0353	0.0016	1071.81	18.5415	1007.54	10.2924	340802	12833.7	1630687	3.0275	0.0068	3.0302	0.006	0.0552	0.0007	1243.22	8.8957
YGL150C	P1	E7	3.1368	0.0072	3.1541	0.0069	0.022	0.0026	1439.82	19.6709	1426.17	21.2677	250571	52965	1307734	3.1668	0.0052	3.168	0.001	0.0355	0.0063	1604.15	7.233	1472.38	2.9837	612373	82099.1	133908342	3.1564	0.0041	3.1707	0.0065	0.0249	0.003	1500.75	32.3345	1482.89	23.6963	303208	122045	14131094	3.1795	0.001	3.1795	0.0048	0.0409	0.0044	1669.06	14.3451
YAL001C	P1	E8	3.0216	0.0104	3.0403	0.0087	0.0288	0.0022	1129.46	34.6647	1097.82	21.362	298777	31516.7	1053756	3.0434	0.0256	3.0521	0.0209	0.0465	0.0009	1251.03	76.6735	1129.18	53.5896	555915	66528.3	104668291	3.0146	0.0099	3.0293	0.01	0.0333	0.0031	1126.27	14.4024	1070.77	24.7525	381388	33922.5	1732655	3.0498	0.0089	3.0516	0.0077	0.0544	0.0052	1292.71	10.5481
YMR109W	P1	E10	3.4376	0.0086	3.458	0.013	0.0222	0.0035	2839.51	39.2415	2871.56	84.1515	488624	77745.3	1916988	3.4581	0.0071	3.4643	0.0103	0.0346	0.0022	3064.88	5.0349	2911.53	69.0335	1.38742e+06	273692	1908710618	3.4241	0.0064	3.4389	0.0092	0.0233	0.0033	2742.58	51.9818	2753.2	61.5084	423213	26543.4	1512780	3.4347	0.0094	3.44	0.0131	0.0383	0.0047	2923.61	55.2493
YDR127W	P1	E11	3.7117	0.0103	3.7368	0.0002	0.0355	0.0097	5475.35	97.7868	5457.94	2.153	2.0989e+06	713005	1404723	3.7259	0.0081	3.737	0.008	0.0484	0.0049	5850.99	123.485	5461.9	98.4228	5.30682e+06	1.3245e+06	140668328	3.7993	0.0191	3.8263	0.0205	0.0332	0.004	6705.74	309.42	6715.95	308.917	2.88482e+06	1.04248e+06	11351069	3.8062	0.0148	3.8229	0.0139	0.0488	0.0069	7040.64	230.439
YPL012W	P1	E12	3.513	0.014	3.5753	0.0043	0.0498	0.0002	3643.56	110.915	3760.15	35.375	1.94188e+06	281938	967651	3.5106	0.0026	3.5466	0.0006	0.0559	0.0016	3642.68	20.0119	3519.43	2.2097	2.41405e+06	504053	100916631	3.5904	0.0123	3.6384	0.0081	0.0383	0.0032	4247.62	98.3606	4353.23	77.2421	1.65203e+06	256669	1753427	3.5771	0.0084	3.6103	0.0011	0.058	0.005	4324.79	39.8297
YGL206C	P1	E13	3.8964	0.0034	3.9198	0.0078	0.0313	0.0122	8214.37	106.627	8309.68	149.492	2.53404e+06	547733	1859831	3.9076	0.0106	3.9181	0.0121	0.0414	0.0106	8633.68	217.791	8290.81	235.173	7.29012e+06	1.35359e+06	185829286	3.8033	0.0118	3.8237	0.0168	0.031	0.0046	6711.02	187.043	6675.34	263.688	2.60052e+06	367681	1427983	3.8073	0.0068	3.8242	0.0113	0.0474	0.0067	6987.85	103.758
YNL091W	P1	E14	3.1543	0.0033	3.1647	0.0027	0.0242	0.0031	1516.63	18.6672	1460.28	8.8352	391573	71240.8	17401064	3.1765	0.0095	3.1751	0.0029	0.0405	0.0017	1673.23	39.9381	1497.22	10.7787	954078	3473.37	1733711264	3.1743	0.0144	3.1736	0.0084	0.0282	0.0061	1612.26	111.547	1493.42	29.652	596133	361967	1249748	3.1994	0.0115	3.1928	0.0114	0.043	0.0063	1774.95	87.3913
YMR229C	P1	E15	3.7098	0.0052	3.7353	0.0007	0.033	0.0045	5402.58	89.033	5436.54	14.7581	1.95092e+06	781835	7891444	3.6952	0.0078	3.7213	0.0057	0.0447	0.0028	5373.4	174.13	5265.79	66.3294	3.90939e+06	1.47455e+06	800614474	3.6754	0.005	3.6994	0.0025	0.0308	0.0035	5019.57	39.0197	5008.99	26.7481	1.70525e+06	173822	1568586	3.6655	0.0121	3.6845	0.0119	0.0497	0.0063	5145.6	109.399
YMR128W	P1	E16	3.2624	0.0124	3.2765	0.0165	0.0244	0.0041	1931.89	62.9316	1890.78	71.5008	435128	18162.8	1319894	3.2704	0.0044	3.2783	0.0093	0.0364	0.0048	2025.1	19.7046	1899.79	40.2751	834792	32559.9	130389178	3.278	0.0069	3.2864	0.0084	0.0292	0.0001	2002.7	36.0791	1936.74	38.498	429248	38974.1	800707	3.301	0.0088	3.3055	0.0113	0.0444	0.0043	2215.87	62.9435
YPL082C	P1	E17	3.4041	0.0089	3.4179	0.0051	0.0232	0.0079	2657.63	28.9546	2619.07	29.4319	571164	85763.9	1647813	3.419	0.006	3.4272	0.0038	0.0336	0.007	2812.82	33.6074	2672.82	21.8111	1.20834e+06	107311	165978592	3.4433	0.0051	3.4627	0.0088	0.0285	0.0005	2915.51	25.5696	2906.46	55.241	855613	230554	1780881	3.4458	0.0093	3.4539	0.0094	0.0422	0.0042	3037.8	67.8164
YOR330C	P1	E18	3.0871	0.0071	3.1005	0.0065	0.0315	0.002	1328.86	17.5653	1261.27	18.7583	439709	62918.1	1325682	3.1203	0.0063	3.1196	0.0046	0.0508	0.0001	1513.61	26.6454	1316.22	13.3538	839284	26453.5	131147528	3.084	0.0041	3.0952	0.0028	0.0275	0.0013	1282.83	6.1901	1245.11	7.4666	230093	19919.8	1281745	3.1225	0.0068	3.1177	0.0054	0.0457	0.0036	1493.12	6.0795
YGR271W	P1	E19	3.1138	0.0092	3.1321	0.0079	0.0235	0.0027	1374.25	23.0789	1354.97	24.7806	281282	95373.5	1721837	3.1383	0.0127	3.1417	0.0093	0.0399	0.0066	1524.44	22.951	1386.12	30.0034	628220	100262	170789338	3.1252	0.0385	3.1384	0.0335	0.027	0.0004	1412.95	128.962	1380.07	106.156	248402	52616.5	13551018	3.1608	0.0374	3.1616	0.0341	0.0434	0.0036	1613.72	127.31
YPL016W	P1	E20	3.1722	0.0468	3.1816	0.0444	0.0212	0.0058	1572.22	154.411	1527.55	155.124	289748	9720.89	917867	3.1984	0.0456	3.1974	0.0426	0.0363	0.0088	1741.93	151.717	1582.85	153.35	764501	29648.9	90779999	3.1462	0.0061	3.1572	0.0012	0.0254	0.0025	1468.48	7.1239	1437.05	1.7034	274885	73941.8	1253925	3.1785	0.0094	3.1772	0.0033	0.0401	0.0046	1653.29	24.9263
YLR371W	P1	E22	3.0243	0.0003	3.0388	0.0038	0.0281	0.0009	1134.76	4.4375	1093.56	9.3866	254371	1964.32	1332817	3.0551	0.0051	3.0513	0.0003	0.0549	0.0016	1328.68	35.6779	1125.62	1.5304	752067	106710	133639271	3.0226	0.0165	3.0328	0.0137	0.0341	0.0047	1153.42	68.994	1079.74	33.9357	438694	157825	13961079	3.0589	0.0173	3.0636	0.0175	0.0505	0.003	1303.79	62.074
YLR454W	P1	E23	3.0748	0.0038	3.087	0.005	0.0284	0.0004	1277.1	11.781	1222.2	12.99	306991	51014.4	1413703	3.1084	0.0064	3.1064	0.0044	0.0485	0.0037	1470.77	38.9138	1278.04	13.304	799042	49838.6	140118179	3.0942	0.0061	3.1136	0.0039	0.0296	0.002	1318.8	7.8466	1300.12	11.1285	237773	6898.29	10461183	3.1188	0.0021	3.1229	0.0002	0.0462	0.0001	1470.72	12.2371
YIL159W	P1	E24	3.0133	0.0073	3.0268	0.0118	0.0348	0.0062	1124.97	2.4369	1064.48	29.5715	297992	41086.7	964549	3.0633	0.0013	3.0599	0.0009	0.0621	0.0048	1379.3	2.7277	1148.26	2.7433	886151	1209.48	98156890	2.9872	0.0218	3.0051	0.0188	0.0351	0.0041	1059.16	43.1249	1013.33	44.6315	266845	53575.1	12541212	3.0174	0.0147	3.0249	0.0174	0.0541	0.0047	1199.49	30.1105
YIL128W	P1	F1	3.2031	0.0021	3.2173	0.0053	0.0213	0.0058	1674.92	19.9128	1649.72	18.5471	306511	55091.2	1437879	3.2272	0.0062	3.2298	0.0078	0.0376	0.006	1846.06	35.1331	1696.43	29.9463	745414	88663.7	1426610090	3.2171	0.0032	3.2317	0.0063	0.0285	0.0009	1742.52	19.8509	1707.3	23.6936	355931	6078.42	1285916	3.2364	0.0055	3.2414	0.006	0.0458	0.0008	1912.54	42.6364
YKL033W	P1	F3	3.0212	0.0028	3.0403	0.0087	0.0336	0.0018	1146.84	3.4321	1097.71	22.5004	313362	49850.6	998792	3.0511	0.0091	3.0573	0.0027	0.0572	0.0012	1311.43	45.5252	1140.45	6.915	676825	109149	99819318	3.0247	0.0095	3.0458	0.0007	0.0378	0.0081	1159.1	1.6892	1111.7	1.9763	282209	19667.3	1659938	3.0535	0.0014	3.0669	0.0095	0.0604	0.0113	1315.86	22.5602
YBL104C	P1	F4	3.1189	0.0101	3.1381	0.0129	0.0403	0.0118	1442.36	64.5924	1374.68	40.7894	459084	31371.9	536757	3.1467	0.0007	3.1643	0.0147	0.0562	0.0094	1595.34	22.7368	1459.91	49.1236	767348	83006.8	53898158	3.1442	0.0119	3.1529	0.0094	0.0273	0.0004	1472.4	41.6952	1423.26	29.0872	280333	9521.21	1576546	3.1591	0.0233	3.1596	0.0218	0.0455	0.0016	1614.56	86.3954
YCR092C	P1	F5	3.0193	0.0043	3.0393	0.0043	0.0273	0.0017	1120.85	18.8034	1094.09	11.4135	241351	77744.6	1189599	3.0465	0.0215	3.0484	0.0134	0.0502	0.004	1284.43	90.4396	1118.06	35.3798	632992	175588	118626722	3.0165	0.008	3.0332	0.0081	0.0326	0.0034	1119.77	11.1139	1080.3	21.8059	235894	28857.6	1522643	3.0511	0	3.0573	0.0001	0.0519	0.0028	1286.78	3.633
YHL007C	P1	F6	3.3258	0.0032	3.3402	0.0022	0.0196	0.0059	2199.15	6.3189	2188.88	8.6641	381290	56726.1	1584703	3.3331	0.0039	3.3404	0.0004	0.0328	0.0052	2302.28	29.5686	2189.91	3.16	813478	24244	157598094	3.3646	0.0196	3.3785	0.0171	0.0247	0.002	2409.7	108.666	2393.96	90.4229	420302	47904.6	1221932	3.3854	0.0232	3.3907	0.0229	0.0408	0.0034	2640.56	146.248
YNL278W	P1	F7	3.108	0.007	3.1196	0.0096	0.023	0.0002	1347.18	8.1233	1318.2	29.353	198105	29614.2	1193568	3.1321	0.0131	3.1358	0.0138	0.04	0.0005	1492.64	32.8184	1367.29	44.1659	577904	17347	121236022	3.1533	0.0181	3.1616	0.022	0.0278	0.0009	1507.28	58.7746	1454.25	72.1039	301289	18014.2	1817267	3.1855	0.0136	3.1843	0.0124	0.0431	0.0026	1697.3	50.4385
YIL075C	P1	F8	3.6436	0.0246	3.6641	0.0211	0.0239	0.0036	4557.54	216.433	4622.09	222.62	945300	213744	15111113	3.6539	0.0269	3.6646	0.0256	0.0373	0.0017	4798.06	201.845	4631.37	272.235	2.51672e+06	630302	1508411314	3.6552	0.0074	3.6809	0.0072	0.0298	0.0025	4745.68	68.3529	4806.26	84.9493	1.24758e+06	221018	1426478	3.6605	0.0071	3.6835	0.0062	0.0463	0.0036	4979.31	54.7473
YKR086W	P1	F9	3.0003	0.0057	3.0198	0.0008	0.0325	0.0028	1091.42	17.755	1047.05	2.5734	323133	32663.6	1731702	3.0221	0.0001	3.0326	0.0044	0.0519	0.001	1213.59	15.4721	1077.1	10.8302	691141	216243	172747942	3.0129	0.0262	3.0217	0.0229	0.0278	0.0023	1097.32	54.2326	1053.14	54.568	219352	28089	1316625	3.0428	0.0231	3.0393	0.0179	0.0463	0.0026	1250.15	54.3988
YGR162W	P1	F10	3.8488	0.0178	3.8882	0.0172	0.044	0.0055	7572.33	294.528	7740.2	310.005	3.36503e+06	1.09872e+06	1428916	3.8314	0.0094	3.8726	0.0096	0.0594	0.0042	7553.48	150.613	7465.56	164.266	7.73586e+06	878047	142039182	3.8831	0.0263	3.9554	0.0051	0.0503	0.0108	8516.76	298.608	9042.88	93.6555	4.29949e+06	884177	1980316	3.8653	0.0292	3.9294	0.0116	0.0711	0.0091	8526.22	339.188
YER033C	P1	F11	3.0436	0.0074	3.0533	0.0067	0.0353	0.0036	1217.15	14.2515	1130.29	17.0738	428348	102061	1371662	3.0647	0.0033	3.0675	0.0015	0.0517	0.0032	1329.73	11.1794	1167.86	4.8791	673310	27804.9	135496957	3.0549	0.0284	3.0663	0.0269	0.0313	0.0006	1226.21	79.224	1167.63	72.1124	304080	15401.5	1516327	3.0937	0.0179	3.0888	0.0219	0.0471	0.0026	1408.54	36.8826
YMR205C	P1	F12	4.3981	0.0331	4.4618	0.0028	0.1073	0.0245	28547.1	845.765	28985.7	185.17	5.43366e+07	4.07457e+07	2216980	4.3982	0.0272	4.4598	0.0038	0.1334	0.0203	30491	1114.51	28818.8	249.447	1.27582e+08	5.92282e+07	2217110131	4.3459	0.0092	4.4313	0.002	0.0828	0.0131	26082.7	36.503	27054	199.209	3.05308e+07	1.5262e+07	1679404	4.3057	0.0282	4.4143	0.0023	0.1245	0.0147	25493.4	510.202
YMR125W	P1	F14	3.4086	0.0124	3.4229	0.0029	0.027	0.0045	2725.89	71.161	2647.97	17.0989	1.06649e+06	26456.6	1833694	3.421	0.009	3.4222	0.0008	0.0379	0.004	2874.14	82.5155	2644.76	5.5708	2.07088e+06	584339	181947604	3.3995	0.0029	3.4181	0.004	0.0286	0.0013	2662.49	41.2755	2623.02	27.2038	1.02679e+06	511757	1749478	3.4124	0.0017	3.4234	0.0069	0.0434	0.0043	2839.03	19.5399
YJR091C	P1	F15	3.2338	0.0078	3.2464	0.0084	0.0246	0.0029	1811.29	32.1888	1764.63	33.6163	416961	26299.8	2024811	3.247	0.006	3.25	0.008	0.0387	0.0008	1936.79	9.2685	1778.31	32.0892	991243	4509.07	202678854	3.222	0.0104	3.2293	0.0116	0.0282	0.0006	1776.49	59.689	1698.58	46.3427	824076	429496	1381732	3.2508	0.0182	3.2493	0.0211	0.0429	0.0011	1961.77	71.4889
YAR019C	P1	F16	3.0514	0.0034	3.0579	0.0099	0.0311	0.0038	1220.98	11.2777	1143.2	27.1083	385020	110887	1656788	3.0706	0.0126	3.0712	0.0172	0.05	0.0013	1349.71	32.6649	1178.2	46.8454	842932	115806	164868602	3.0593	0.0173	3.0614	0.0124	0.0318	0.0002	1257.03	55.0803	1152.02	32.3818	747437	308604	1719509	3.0943	0.008	3.0868	0.0057	0.0492	0.0007	1423.48	23.4791
YPL022W	P1	F17	3.0555	0.0045	3.0559	0.0099	0.0419	0.0087	1281.67	2.1377	1137.25	26.032	675102	56801.4	1739630	3.0813	0.0073	3.0742	0.0112	0.0611	0.0092	1435.05	3.5171	1187.41	31.0294	1.19535e+06	78233.9	174277144	3.0689	0.0143	3.0783	0.0149	0.0345	0.0013	1348.08	27.4885	1198.23	40.3989	1.43119e+06	946531	1425788	3.0961	0.0117	3.0968	0.0148	0.0514	0.0018	1454.09	17.8178
YGR240C	P1	F18	4.3321	0.0359	4.3745	0.0185	0.0662	0.028	23722.4	1063.28	23695.3	1010.52	2.84035e+07	1.52079e+07	1671276	4.3246	0.0364	4.3717	0.0083	0.0938	0.0367	24956.7	365.375	23565.5	450.496	7.53629e+07	1.84148e+07	166123557	4.3238	0.0157	4.3736	0.0134	0.0545	0.0019	23178.8	523.826	23670.2	782.529	2.02345e+07	1.04837e+07	1722931	4.2963	0.0117	4.3601	0.0045	0.0903	0.0039	22913.6	135.932
YAL035W	P1	F20	3.9716	0.0044	3.9955	0.0015	0.0426	0.0054	9965.11	136.717	9894.72	29.5845	5.7249e+06	2.69486e+06	1603747	3.9856	0.0066	3.9963	0.0007	0.0543	0.002	10606.4	50.3362	9913.15	22.5822	1.40095e+07	4.32206e+06	159388185	3.9547	0.0003	3.986	0.0125	0.0361	0.0015	9613.94	181.715	9703.76	268.567	4.94738e+06	2.19282e+06	13601083	3.9545	0.0014	3.9793	0.0094	0.0581	0.0012	10023.9	229.818
YBR245C	P1	F23	3.3635	0.0555	3.3361	0.0179	0.0424	0.0127	2603.58	439.404	2170.74	87.6539	2.10994e+06	1.47515e+06	1164463	3.3962	0.0528	3.376	0.027	0.0552	0.0101	2883.08	452.722	2380.13	148.008	2.95121e+06	1.65984e+06	114125460	3.2915	0.0195	3.3047	0.0229	0.0251	0.0021	2051.14	96.703	2023.02	107.696	529803	18952.3	13931170	3.3072	0.0103	3.3097	0.0137	0.0401	0.0039	2213.56	55.5647
YMR176W	P1	G1	2.9872	0.0042	2.9962	0.0042	0.0323	0.0007	1073.15	22.1587	990.557	9.7129	529209	60611.2	12091197	3.0418	0.0152	3.025	0.004	0.0663	0.0074	1339.44	56.6107	1058.95	9.856	1.01664e+06	102282	1203712304	2.9897	0.0339	3.0065	0.0251	0.0369	0.0003	1099.49	116.073	1016.84	59.1384	534626	363586	1391632	3.0255	0.0294	3.0268	0.0259	0.057	0.0001	1270.96	124.581
YER013W	P1	G2	3.0745	0.0145	3.0844	0.0076	0.0261	0.0001	1270.07	51.5318	1214.89	20.7693	308141	46753.7	5881095	3.1242	0.0268	3.1123	0.0147	0.0489	0.0011	1530.29	107.658	1295.46	43.9038	917827	223211	601311916	3.0628	0.0112	3.0744	0.0045	0.0315	0.0003	1252.51	36.5924	1187.98	12.2951	378980	40724.3	1276739	3.0945	0.0071	3.0929	0.0061	0.0479	0.0025	1419.6	42.306
YDR464W	P1	G3	3.0064	0.0036	3.0233	0.0047	0.0267	0.0034	1091.66	6.4842	1054.6	11.9973	255140	120740	897839	3.0389	0.0091	3.0391	0.0089	0.0484	0.0038	1256.01	6.3985	1095.09	22.029	622940	71244.1	90039487	3.0145	0.0055	3.0362	0.0123	0.0343	0.0032	1122.17	17.6862	1087.59	30.3349	279382	61734.1	1397880	3.0505	0.008	3.0588	0.0089	0.0511	0.0031	1278.98	31.4307
YHR158C	P1	G4	3.1919	0.0001	3.2063	0.0033	0.0188	0.0046	1613.48	2.4596	1607.9	11.6496	197990	23206.7	1078802	3.2269	0.0109	3.2222	0.0072	0.0356	0.0074	1842.78	66.5484	1667.2	26.9846	741474	154526	108398751	3.1882	0.0034	3.2022	0.0049	0.0249	0.0022	1609.12	20.3038	1594.13	20.5953	256113	11838.7	1357878	3.2097	0.0013	3.2075	0.007	0.0394	0.0044	1769.34	11.4946
YGR233C	P1	G6	3.0484	0.0054	3.0634	0.0074	0.0242	0.0034	1187.8	24.7438	1157.21	18.8	232497	89804.8	1204788	3.0693	0.0063	3.0711	0.0081	0.0427	0.0058	1321.32	41.3512	1177.76	22.1825	578944	130198	119818367	3.0506	0.0192	3.0629	0.0216	0.0293	0.0002	1196.92	47.3978	1158.43	56.316	232790	36964.9	1247614	3.0867	0.0147	3.0869	0.0153	0.0468	0.001	1375.56	40.8183
YDR180W	P1	G7	3.0615	0.0015	3.0764	0.0014	0.0245	0.005	1229.1	14.8759	1193.24	3.3721	281473	139371	818471	3.0885	0.0045	3.0902	0.0032	0.0436	0.0061	1382.3	38.9202	1232.11	8.8987	626201	136535	81225134	3.0618	0.0016	3.0768	0.0028	0.0308	0.0002	1238.86	11.2787	1194.24	6.1746	299030	86495.6	1415562	3.0878	0.0034	3.0911	0.0043	0.0507	0.0015	1401.77	10.9831
YKR096W	P1	G8	3.0056	0.0066	3.0208	0.0088	0.0306	0.001	1096.51	14.0807	1049.5	21.2427	271752	1729.49	1325627	3.0486	0.0116	3.0468	0.0058	0.0546	0.0008	1306.61	54.0434	1114.91	14.8923	718798	142828	132887209	3.0281	0.0071	3.0463	0.0056	0.0324	0.0036	1149.52	6.6213	1113.73	15.3992	266337	19919.4	1257806	3.0615	0.0029	3.0644	0.0024	0.0492	0.002	1304.46	2.6971
YOL004W	P1	G9	2.938	0.012	2.9576	0.0104	0.0354	0.0023	963.216	0.3906	907.15	21.1753	326236	185242	757662	2.9632	0.0238	2.9727	0.0233	0.0529	0.005	1073.52	23.7111	940.54	50.7484	553967	113310	76466933	2.9494	0.0013	2.9722	0.0045	0.0373	0.0007	984.315	12.8293	938.384	10.2332	298310	112863	1372811	2.9838	0.004	2.9912	0.001	0.0542	0.0014	1122.64	1.2093
YGL140C	P1	G10	3.1239	0.0151	3.1446	0.0124	0.0297	0.0046	1413.73	65.7214	1396.21	38.951	240774	41194.1	744735	3.1525	0.0105	3.1604	0.0086	0.0397	0.0033	1561.82	32.5856	1446.56	27.7844	577511	44422	75227679	3.1491	0.0017	3.1625	0.0051	0.0263	0.0007	1480.52	4.2581	1454.83	18.3243	244688	9975.71	1353732	3.1738	0.0067	3.1748	0.0019	0.0418	0.0033	1641.46	21.407
YNL242W	P1	G11	3.0096	0.0016	3.0293	0.0013	0.0266	0.0058	1111.86	39.3565	1068.92	3.3064	453717	338504	1464607	3.0398	0.0128	3.0413	0.0083	0.0482	0.0094	1286.87	105.461	1099.62	20.9196	1.35498e+06	938016	144627370	2.9785	0.0276	2.9876	0.0305	0.0294	0.0009	1022.27	67.6741	974.792	69.6236	248315	29781.2	836969	3.0099	0.024	3.0082	0.0284	0.0512	0.0009	1190.33	76.781
YHR155W	P1	G12	2.9582	0.0062	2.9812	0.0022	0.0315	0.0004	989.19	21.3576	957.557	4.1023	232684	81188.2	982708	2.9845	0.0115	2.9922	0.0062	0.0576	0.0027	1131.44	41.7544	982.009	14.3999	562752	105769	97767964	2.9548	0.0095	2.9737	0.0098	0.0358	0.0033	994.512	21.2999	941.797	22.3321	398576	173508	1224868	2.9881	0.0059	2.9931	0.0047	0.0552	0.0055	1127.44	5.0576
YMR219W	P1	G13	3.0958	0.0162	3.107	0.011	0.0258	0.0009	1336.89	48.9125	1280.33	32.7806	392738	50522.4	873750	3.1173	0.0157	3.1194	0.0136	0.0419	0.0046	1468.76	31.2675	1317.45	42.1119	690763	126736	86728170	3.0743	0.0061	3.0865	0.002	0.0312	0.0014	1278.23	28.6486	1222.08	6.2489	310905	22641.8	1097847	3.1055	0.0182	3.1102	0.0139	0.0479	0.0016	1440.8	67.3923
YDR097C	P1	G14	3.0412	0.0042	3.0569	0.0059	0.0265	0.0002	1169.58	7.3314	1140.46	16.3748	184854	3135.21	1491885	3.0565	0.0005	3.0686	0.0086	0.0423	0.0018	1267.89	1.9867	1171.51	23.0874	479424	32020.3	148459056	3.034	0.0245	3.0559	0.021	0.0339	0.0051	1169.33	43.5558	1139.33	56.145	242398	29374.5	1095648	3.0654	0.0218	3.0758	0.0205	0.0542	0.0058	1330.54	47.5564
YDL140C	P1	G15	3.7373	0.0067	3.7699	0.0059	0.0378	0.014	5837.72	4.6135	5886.86	84.5623	2.10678e+06	414380	1503633	3.742	0.003	3.7659	0.0069	0.0504	0.005	6065.34	21.68	5835.01	92.5213	5.43513e+06	1.14296e+06	149226536	3.6878	0.0165	3.7018	0.0176	0.0323	0.0024	5195.95	210.994	5043.31	201.844	2.06949e+06	566051	1276817	3.6932	0.0132	3.7003	0.0191	0.0501	0.001	5482.47	230.335
YKL129C	P1	G16	3.278	0	3.29	0.004	0.0207	0.0056	1979.63	5.3849	1950.32	19.2442	341768	1438.55	1513861	3.2983	0.0017	3.2969	0.0019	0.0348	0.0065	2155.35	0.4054	1981.47	10.8659	942160	19164.1	149338884	3.2321	0.0099	3.2399	0.0086	0.0272	0.0041	1808.54	69.8786	1740.73	36.2727	461680	174756	1414512	3.2611	0.0098	3.2546	0.0082	0.0426	0.0056	2024.42	71.7531
YHL030W	P1	G17	3.2051	0.0279	3.2108	0.0162	0.0257	0.0003	1702.76	129.136	1625.99	61.73	377323	150150	1225521	3.2272	0.0298	3.2269	0.0221	0.0395	0.0029	1868.16	128.479	1688.18	84.3757	959467	10596.2	121035731	3.1751	0.002	3.1843	0.0003	0.0279	0.0028	1594.73	16.4532	1530.16	0.2993	547077	252233	1144751	3.1988	0.0031	3.1961	0.0023	0.0441	0.0045	1790.94	26.3192
YDL019C	P1	G18	3.1878	0.0032	3.1963	0.0053	0.0235	0.0009	1617.77	31.9097	1572.93	19.4698	284087	67716.3	902943	3.2141	0.0079	3.215	0.002	0.0369	0.0016	1801.6	32.3982	1641.03	7.5162	3.74529e+06	2.92908e+06	89499558	3.1703	0.0049	3.1824	0.0032	0.0269	0.0002	1556.35	21.2263	1522.07	10.7902	264138	8187.86	1207638	3.1969	0.0088	3.1952	0.0063	0.0419	0.0024	1733.14	36.7656
YJL207C	P1	G19	3.1864	0.0074	3.1988	0.0078	0.0183	0.0051	1593.56	31.1296	1580.01	28.6958	187792	37478.3	1433492	3.1972	0.0002	3.203	0.006	0.0334	0.0061	1701.1	3.6371	1595.69	20.6176	586752	27123.7	141825786	3.1847	0.0174	3.1935	0.0134	0.0245	0.0022	1594.44	56.9468	1563.5	48.187	249272	2352.65	1162952	3.2052	0.0218	3.2038	0.0177	0.0397	0.004	1753.33	82.4294
YJR092W	P1	G20	3.1111	0.0439	3.1335	0.0445	0.0262	0.0002	1382	138.897	1366.86	140.791	317679	27878	712707	3.1358	0.0462	3.1448	0.0462	0.0364	0.0043	1504.67	148.053	1403.5	147.812	597127	7656.21	70937543	3.0844	0.0026	3.0981	0	0.0277	0.0002	1285.14	10.4751	1253.83	1.2565	245626	24660.1	821765	3.109	0.0039	3.112	0.0079	0.0426	0.0014	1419.95	10.8178
YJL130C	P1	G21	3.9893	0.0173	4.0136	0.0226	0.0432	0.0075	10390.5	388.151	10337.5	540.327	6.1177e+06	2.91256e+06	577681	3.972	0.006	4.0029	0.0021	0.0629	0.0057	10471.6	159.994	10074.6	45.8143	1.49012e+07	4.95979e+06	57357406	4.0605	0.0169	4.0967	0.0166	0.0392	0.0036	12306	362.715	12533	497.421	6.65868e+06	2.73512e+06	1208820	4.0588	0.0209	4.0909	0.019	0.059	0.0017	12619.4	384.166
YAL017W	P1	G22	3.1003	0.0293	3.095	0.016	0.0353	0.0088	1438.86	165.356	1245.89	46.9444	849739	382003	913595	3.1284	0.0234	3.1156	0.0106	0.0554	0.0068	1606.62	159.52	1305.14	31.339	1.40785e+06	694669	89117012	3.0677	0.0238	3.0714	0.0123	0.0346	0.0064	1334.28	162.351	1180.52	33.6967	926070	735312	726904	3.1059	0.0241	3.0934	0.0132	0.0541	0.0085	1575.26	220.439
YGL195W	P1	G23	3.6482	0.0328	3.6871	0.0139	0.0398	0.0092	4809.85	317.583	4869.42	157.479	1.98333e+06	752567	1101612	3.6453	0.0407	3.6746	0.0264	0.048	0.0081	4880.67	433.069	4735.43	287.995	3.56722e+06	1.13389e+06	109437013	3.5958	0.0031	3.6093	0.0007	0.0302	0.0037	4177.76	16.5717	4070.1	13.6783	1.44409e+06	271829	976940	3.5997	0.0044	3.6098	0.0006	0.0479	0.005	4405.41	45.8409
YGR270W	P1	G24	3.0598	0.0188	3.0755	0.0155	0.0306	0.0009	1245.54	57.0355	1190.52	42.0978	390323	102119	1282598	3.1091	0.0121	3.0949	0.0139	0.0559	0.0028	1508.98	33.9483	1245.46	40.4255	975615	24384.8	128207256	3.0763	0.0026	3.0879	0.0025	0.0278	0.0023	1270.18	28.3491	1224.67	7.7546	375924	199125	1169830	3.1095	0.0025	3.1077	0.0037	0.0438	0.0039	1438.17	29.036
YMR189W	P1	H1	3.7236	0.0304	3.7543	0.0207	0.0326	0.0125	5610.26	320.363	5688.18	273.928	1.91683e+06	522108	3991104	3.7125	0.0295	3.7399	0.0201	0.0417	0.0108	5581.01	346.879	5495.16	253.94	3.56905e+06	899844	398311411	3.5764	0.0196	3.6089	0.0075	0.0413	0.0027	4197.11	195.423	4069.12	67.0824	2.20801e+06	716491	1248506	3.5872	0.0243	3.6113	0.0191	0.056	0.0017	4403.88	262.568
YML111W	P1	H2	3.0683	0.0103	3.0799	0.0021	0.0454	0.0094	1327.37	25.3979	1200.83	5.5966	604979	53410.1	654831	3.103	0.002	3.1083	0.0137	0.0705	0.013	1526.16	5.9812	1283.26	41.0843	1.08585e+06	14173.5	65319176	3.0946	0.0076	3.1301	0.0185	0.0426	0.0106	1384.54	10.792	1350.71	56.8264	419118	26137.9	1092637	3.1194	0.0059	3.1444	0.016	0.0656	0.0163	1541.88	24.1021
YDR069C	P1	H4	3.0138	0.0162	3.0383	0.0187	0.0416	0.0138	1143.92	74.7864	1093.28	48.0199	356948	56670.3	878909	3.0317	0.0203	3.0535	0.0295	0.0616	0.0145	1254.09	84.6643	1133.47	77.6867	663206	83414.8	88599143	3.0327	0.0179	3.0605	0.0259	0.0363	0.0066	1173.69	68.9662	1151.26	67.843	232746	28893.9	1183634	3.0734	0.0252	3.0855	0.03	0.054	0.006	1358.15	93.463
YJR132W	P1	H5	3.3347	0.0107	3.3512	0.0122	0.0236	0.0042	2266.63	63.704	2246.7	61.9554	502901	134009	1297618	3.3399	0.0099	3.3496	0.0116	0.0336	0.0054	2340.24	47.7877	2237.64	58.932	786089	73399.9	128946722	3.343	0.0115	3.3605	0.0088	0.0269	0.0032	2312.78	48.0443	2296.59	44.1692	472780	880.201	1465475	3.353	0.0127	3.3616	0.0051	0.0433	0.0051	2480.86	62.4416
YML109W	P1	H6	3.0222	0.0068	3.0398	0.0032	0.028	0.0011	1123.15	24.7438	1095.9	7.1612	172144	19369.5	1373836	3.0526	0.0066	3.064	0.002	0.0469	0	1276.55	27.7262	1158.75	4.2305	587352	78958.6	136398432	3.0642	0.0001	3.089	0.0091	0.0366	0.007	1260.56	23.6033	1228.88	25.9406	274626	10613	1153508	3.0929	0.0104	3.1073	0.0187	0.0546	0.0077	1418	54.2183
YDR310C	P1	H7	3.1169	0.0209	3.1251	0.0181	0.0232	0.0026	1395.1	59.1247	1335.37	56.5789	658240	310261	961635	3.127	0.028	3.1314	0.0264	0.0395	0.0034	1486.73	98.3781	1355.53	81.7309	893331	168609	95706243	3.1244	0.0086	3.1383	0.0074	0.0262	0.0005	1398.85	28.7452	1376.33	23.6585	221055	12303	1355332	3.1489	0.0093	3.1472	0.0075	0.0425	0.0041	1563	19.4568
YLL003W	P1	H8	2.9885	0.0085	3.0032	0.0018	0.0427	0.0151	1095.3	72.5811	1007.32	3.7979	636721	427177	15251218	3.0074	0.0016	3.0184	0.0016	0.0613	0.01	1202.39	22.7921	1043.07	4.5373	894453	205565	1519612131	3.0054	0.0065	3.0371	0.0036	0.0421	0.0084	1129.35	3.9434	1089.79	8.5391	317669	20599.9	1355450	3.0489	0.0127	3.0611	0.002	0.0614	0.0097	1316.76	20.547
YIL156W	P1	H9	3.0336	0.0316	3.0504	0.0214	0.035	0.003	1180.47	89.7825	1125.22	55.4291	275122	105922	1247580	3.0775	0.0525	3.082	0.039	0.0549	0.0021	1395.7	196.482	1212.31	108.227	686964	292234	124377357	3.0328	0.0083	3.0493	0.0099	0.0317	0.0019	1162.62	28.9812	1120.27	24.7553	262050	8236.29	1720938	3.0557	0.0075	3.0597	0.008	0.0508	0.0021	1295.61	26.6101
YNL127W	P1	H10	3.0375	0.0025	3.0513	0.0017	0.0329	0.0044	1183.39	16.9348	1124.74	4.5404	343788	18101.5	1684710	3.072	0.01	3.0736	0.0056	0.0524	0	1362.41	44.4617	1184.32	15.6266	758434	131098	168217523	3.0373	0.0144	3.0691	0.0047	0.0432	0.0146	1204.8	7.3471	1172.79	11.6066	282043	36015.6	1455772	3.0662	0.0058	3.0907	0.0115	0.065	0.018	1359.33	33.941
YOL145C	P1	H11	3.3674	0.0164	3.3823	0.0163	0.0219	0.0064	2430.54	102.984	2415.37	90.4964	408165	79842.5	1738589	3.3799	0.0189	3.3855	0.0185	0.0313	0.0074	2553.01	116.323	2430.23	104.284	905131	150907	173246795	3.3965	0.0049	3.4172	0.0057	0.025	0.0029	2590.71	23.3446	2616.25	29.4373	459862	12548.9	1387623	3.4138	0.005	3.4263	0.0012	0.0383	0.0061	2787.74	23.5858
YHR120W	P1	H12	3.0135	0.0085	3.0438	0.0202	0.0479	0.0179	1155.33	60.0176	1106.99	51.5173	351147	53242.5	1503915	3.0321	0.0109	3.0571	0.0289	0.0699	0.02	1273.75	60.6974	1143.52	75.7484	702008	57268.4	150229323	3.0303	0.0261	3.0396	0.0234	0.0322	0.0007	1166.87	65.072	1098.61	59.0526	304980	14948.7	1328604	3.0612	0.0225	3.0603	0.0218	0.0512	0.0012	1319.16	67.8783
YIL112W	P1	H13	3.0591	0.0061	3.0789	0.0069	0.0263	0.0005	1218.11	12.7948	1199.37	19.0521	218357	27459.8	1850620	3.0822	0.0152	3.0903	0.0113	0.0431	0.002	1349.22	53.8318	1231.77	32.8188	519742	98725	183346415	3.1056	0.0121	3.1146	0.0116	0.0308	0.0016	1376.7	26.7084	1302.57	34.0241	384223	69890.5	1328428	3.1337	0.016	3.1325	0.0145	0.0456	0.0029	1531.03	43.6732
YMR287C	P1	H14	3.0499	0.0029	3.0629	0.0039	0.0306	0.0036	1211.66	5.648	1156.01	9.7031	369385	14941.2	1563704	3.0752	0.0102	3.0827	0.0077	0.0467	0.0015	1344.53	41.9587	1209.1	21.1464	600596	101826	156567563	3.0982	0.032	3.1128	0.0387	0.0325	0.0026	1357.9	110.52	1302.91	115.375	322810	42450.4	980466	3.1351	0.024	3.1359	0.0264	0.0477	0.001	1542.83	79.6816
YDL215C	P1	H15	3.259	0.035	3.2573	0.0327	0.0359	0.0031	1995.3	178.899	1815.02	137.069	840927	277995	1710974	3.2957	0.0123	3.2734	0.0246	0.0621	0.0018	2409.21	4.5811	1878.18	106.544	3.61311e+06	334187	1720910293	3.2387	0.0267	3.2435	0.0335	0.0456	0.0066	1991.57	163.881	1758.95	133.782	1.05895e+06	296932	1127613	3.2631	0.0226	3.2572	0.0322	0.0691	0.0128	2234.72	184.053
YBR084W	P1	H16	3.3523	0.0047	3.3728	0.0018	0.0279	0.0053	2388.05	16.3113	2360.02	10.387	573401	59156	1524679	3.3523	0.0057	3.3737	0.0017	0.0377	0.0049	2429.34	39.5402	2364	9.4888	946001	97997.9	151047830	3.3846	0.0119	3.4001	0.0181	0.0291	0.0045	2574.32	94.7866	2517.16	107.282	642785	43714.7	12901028	3.4008	0.009	3.4101	0.0156	0.0453	0.0053	2781.55	68.7513
YKL205W	P1	H17	3.174	0.025	3.1988	0.0128	0.034	0.0095	1602.75	49.6441	1581.45	48.2495	448786	152249	1477725	3.1945	0.0225	3.2071	0.0121	0.0492	0.0068	1774.9	73.5248	1611.16	44.4066	4.26272e+06	3.28323e+06	147268367	3.2167	0.0069	3.2331	0.0058	0.0271	0	1732.79	19.4148	1712.25	22.2323	323560	28368	1371790	3.2446	0.011	3.2489	0.012	0.0438	0.0012	1939.85	37.4224
YDR430C	P1	H18	3.202	0.022	3.2139	0.0239	0.0247	0.0031	1691.61	90.5743	1638.94	88.6935	440088	70174.4	1687607	3.2136	0.0176	3.2183	0.0183	0.0384	0.0061	1808.22	100.169	1653.6	68.711	1.02219e+06	445693	167206781	3.2269	0.0191	3.2336	0.0227	0.027	0.0024	1791.29	97.9501	1715.76	90.304	602897	286450	1395584	3.2484	0.0149	3.2503	0.0173	0.0438	0.0027	1975.44	78.2842
YBL063W	P1	H19	2.9584	0.0434	2.9948	0.0308	0.0508	0.0177	1021.95	75.9334	990.959	69.6616	259244	33040.6	1609661	2.9894	0.0524	3.0061	0.0281	0.0734	0.013	1195.54	140.422	1016.4	65.7926	1.65835e+06	647862	160657355	2.9712	0.0193	2.9911	0.0107	0.0405	0.0082	1031.18	27.6909	980.957	24.9686	227365	20664.7	1180746	3.0183	0.0147	3.0292	0.0064	0.0631	0.0101	1231.91	24.7101
YGL241W	P1	H20	3.049	0.01	3.0699	0.0039	0.0329	0.0073	1204.65	8.1809	1174.04	10.4477	246656	14275.5	1325734	3.064	0.005	3.0796	0.0006	0.0511	0.0034	1322.54	16.0681	1201.27	1.2184	679810	89744.7	132417913	3.094	0.018	3.1079	0.0165	0.0313	0.0018	1339.41	56.8431	1283.45	47.1773	489692	173245	889855	3.1201	0.0185	3.1221	0.0173	0.0494	0.0008	1499.17	60.138
YIL151C	P1	H21	2.9674	0.0054	2.9802	0.0072	0.0367	0.0049	1034.3	11.2459	956.044	15.2382	415742	101040	1352736	2.9896	0.0086	2.9988	0.0068	0.0551	0.0029	1145.28	38.4057	998.156	15.2768	790314	294749	134257875	2.9587	0.0231	2.9994	0.0024	0.0566	0.0217	1072.27	15.2755	998.873	5.8277	653378	292618	1190757	3.0027	0.0084	3.0308	0.0178	0.0756	0.0233	1239.61	1.3274
YAL019W	P1	H23	3.1938	0.0082	3.2078	0.0042	0.0218	0.0054	1637.38	22.9664	1614.18	15.8682	264727	12029.6	1311790	3.2132	0.0048	3.2186	0.0004	0.035	0.0065	1774.69	8.1039	1654.89	0.4963	654815	56679.2	130358308	3.1877	0.0048	3.2012	0.0059	0.0261	0.0015	1617.69	19.6729	1591.31	21.9889	283207	7036.4	1196800	3.2017	0.0007	3.2042	0.0046	0.0423	0.0028	1751.66	6.1687
YGR047C	P1	H24	3.0598	0.0092	3.0679	0.0021	0.033	0.0032	1252.62	39.7912	1168.96	5.6716	417322	71105.8	1601759	3.0934	0.0146	3.0846	0.0074	0.0585	0.0041	1465.65	61.2106	1214.28	21.0951	1.03617e+06	236745	157998965	3.0525	0.0163	3.0643	0.0143	0.0331	0.0025	1226.45	60.5685	1161.05	36.6796	333603	78010.7	13841032	3.0811	0.0119	3.0864	0.011	0.0535	0.0048	1386.69	59.0387
YLR086W	P1	I1	3.0599	0.0051	3.0739	0.0081	0.0243	0.0036	1222.03	0.0531	1185.69	22.4041	260927	120420	1332745	3.1081	0.0119	3.1028	0.0072	0.0474	0.0007	1461.13	42.362	1266.23	21.4252	769889	62066.4	134168525	3.0853	0.0142	3.104	0.0106	0.031	0.0027	1302.9	56.35	1271.2	30.2548	284076	63233.9	1115778	3.1097	0.0177	3.1144	0.0163	0.0468	0.0005	1446.16	60.1045
YLR410W	P1	I2	3.3154	0.0126	3.3321	0.0099	0.0184	0.0044	2134.83	66.0647	2147.21	48.628	263487	27718.7	985831	3.3303	0.0207	3.3311	0.0129	0.0331	0.0048	2302.51	120.192	2145.23	63.2795	1.01442e+06	109664	98948577	3.2977	0.0056	3.3101	0.0059	0.026	0.002	2075.1	33.7434	2045.59	29.5209	378670	36195.6	1275735	3.3203	0.0029	3.3193	0.007	0.0411	0.0048	2290.59	21.979
YAL024C	P1	I3	3.0358	0.0152	3.0518	0.0112	0.024	0.0028	1152.69	36.0847	1126.72	28.8632	193738	31033	959697	3.0789	0.0131	3.0735	0.0075	0.048	0.0028	1373.89	27.6367	1184.42	21.4458	781401	89729.1	96757196	3.0439	0.0077	3.0585	0.0075	0.0308	0.0006	1187.43	23.0974	1144.74	18.3715	241791	4512.1	1268525	3.0778	0.0143	3.0792	0.0133	0.048	0.0009	1356.73	34.1622
YLR032W	P1	I4	3.0041	0.0091	3.0198	0.0088	0.0295	0.0017	1090.55	31.051	1046.72	21.5411	235866	76168.1	1007775	3.0287	0.0197	3.0302	0.0122	0.0511	0.0063	1240.93	94.3654	1072.31	30.9568	638550	209804	101178996	2.9827	0.0059	3.0023	0.0034	0.0365	0.0045	1051.62	3.7442	1005.93	7.3537	237089	17932.5	1308759	3.0211	0.011	3.0283	0.0102	0.0566	0.0057	1220.45	19.9384
YNL102W	P1	I5	3.1	0.014	3.1105	0.0155	0.0258	0.0022	1349.58	37.1788	1291.22	45.9874	424841	29747.1	455731	3.119	0.013	3.1209	0.0121	0.0421	0.0048	1474.48	25.2011	1321.64	36.3594	782172	150924	44327526	3.1201	0.014	3.1349	0.0088	0.0319	0.0013	1424.69	55.1842	1366.04	28.0109	370585	25923.9	1256617	3.153	0.0163	3.1572	0.0137	0.0491	0	1612.22	62.4117
YGL062W	P1	I6	3.6606	0.0764	3.6824	0.0846	0.0493	0.0047	5163.82	955.453	4903.68	940.188	4.27728e+06	2.64581e+06	730551	3.6841	0.0589	3.6837	0.0773	0.0692	0.001	5785.87	712.432	4903.92	859.761	1.0042e+07	3.48808e+06	73196257	3.6155	0.015	3.6447	0.0183	0.0451	0.0019	4639.23	223.384	4422.78	183.682	2.90866e+06	1.13279e+06	1123627	3.6218	0.0084	3.6432	0.0121	0.0638	0.0032	4902.2	171.868
YPL242C	P1	I7	2.9356	0.0044	2.9576	0.0084	0.0322	0.0021	937.457	2.4827	906.459	17.8136	216958	100169	1245683	2.9525	0.0055	2.9678	0.0092	0.0505	0.0012	1035.67	10.2541	927.762	19.7831	632269	310533	124877129	2.943	0.0127	2.9646	0.0139	0.036	0.0004	962.841	23.2013	922.535	28.7558	238443	42936.5	1177530	2.9913	0.0008	2.9946	0.0025	0.0577	0.0029	1156.5	13.7883
YPL226W	P1	I8	3.8793	0.0097	3.9193	0.0023	0.0457	0.0135	8173.19	89.0944	8297.6	42.9235	4.38023e+06	1.82989e+06	934838	3.8618	0.0112	3.8987	0.0033	0.0559	0.0104	8063.95	143.34	7923.36	60.2588	8.04622e+06	1.93768e+06	93278685	3.8699	0.0074	3.9114	0.0053	0.0426	0.0043	8096.99	132.055	8165.26	108.873	4.29531e+06	1.31243e+06	1129584	3.8628	0.0018	3.9079	0.0061	0.0665	0.0061	8347.69	99.8782
YML072C	P1	I9	3.5881	0.0251	3.5995	0.0245	0.0213	0.0078	4007.96	246.119	3981.9	222.665	776161	151133	1194654	3.5904	0.0294	3.5989	0.0239	0.0283	0.0079	4074.19	258.259	3979.77	220.526	1.49142e+06	245471	117096896	3.5539	0.0087	3.5778	0.0101	0.0272	0.0027	3737.42	66.9484	3784.21	91.8116	856188	135990	1196831	3.5603	0.0055	3.5737	0.0053	0.0386	0.0058	3872.72	50.3777
YLR084C	P1	I10	3.2521	0.0061	3.2605	0.0065	0.023	0.0037	1879.37	28.4015	1822.27	28.7804	380456	4933.94	1264468	3.2572	0.0002	3.2581	0.0071	0.0368	0.0039	1968.01	9.8706	1810.39	29.6477	854983	108181	126595624	3.279	0.0213	3.2902	0.022	0.0261	0.0028	1995.91	109.671	1954.93	99.5397	405826	65086.3	1251568	3.2923	0.0243	3.2935	0.0299	0.043	0.0046	2168.36	126.533
YNL139C	P1	I11	3.1634	0.0014	3.1757	0.0047	0.0222	0.0039	1534.28	15.1356	1500.18	16.2911	317856	111556	1347541	3.1835	0.0075	3.1873	0.0083	0.0369	0.0058	1670.45	41.9004	1540.66	29.5385	685344	115574	133766107	3.1602	0.0065	3.1737	0.01	0.0275	0.0007	1528.82	18.579	1493.75	33.6303	329869	57709.2	1361560	3.1824	0.0009	3.1847	0.0005	0.044	0.0012	1687.86	10.186
YNL257C	P1	I12	3.1151	0.0031	3.1226	0.0036	0.0255	0.0015	1387.05	6.9875	1326.88	11.6527	295431	22036.7	1076364	3.1365	0.0195	3.1348	0.0138	0.0465	0.005	1559.32	95.1237	1365.5	43.2957	828182	177304	105883772	3.1249	0.0091	3.1339	0.002	0.0308	0	1442.08	29.271	1361.27	5.2819	494262	42962.8	473236	3.1564	0.0054	3.1515	0.0041	0.0513	0.0003	1644.28	22.4995
YDR283C	P1	I13	3.088	0.027	3.0925	0.0205	0.0311	0.0029	1340.52	99.4383	1239.1	58.2349	467879	102789	1152470	3.125	0.03	3.1224	0.0344	0.0524	0.0016	1542.24	114.663	1329.84	106.068	868211	108759	115645770	3.042	0.0029	3.0555	0.0022	0.0332	0.0011	1199.46	11.2882	1137.27	5.2362	373897	108671	1400650	3.0717	0.0064	3.0711	0.0071	0.0516	0.0014	1355.26	19.0925
YBL007C	P1	I14	3.4349	0.0531	3.5391	0.0309	0.0676	0.0112	3234.88	255.718	3469.86	243.781	1.91057e+06	453173	410281	3.4304	0.0076	3.4834	0.0014	0.0731	0.0042	3228.32	0.5647	3043.41	8.117	2.84852e+06	210623	40893268	3.4671	0.0101	3.5357	0.0028	0.0437	0.0035	3254.07	9.7777	3437.2	19.2191	1.30133e+06	407628	882312	3.4412	0.0009	3.4938	0.001	0.0632	0.002	3222.41	31.958
YNL172W	P1	I15	2.9572	0.0032	2.9721	0.0031	0.0275	0.0054	985.016	35.0679	937.342	6.4482	318533	228459	1370672	2.989	0.007	2.9907	0.0037	0.0513	0.0061	1145.32	61.1427	978.694	9.078	828601	393090	134667130	2.9715	0.0121	2.9902	0.0184	0.0358	0.0022	1065.67	24.5156	978.802	41.0818	889018	695291	1214747	3.0081	0.0132	3.0089	0.0149	0.0554	0.0001	1213.56	3.0045
YOR124C	P1	I16	3.1145	0.0015	3.1221	0.0011	0.0303	0.0022	1407.04	15.6156	1324.35	2.1439	403046	26775.6	1129723	3.1399	0.0111	3.1417	0.0083	0.0464	0.0037	1552.01	64.2075	1385.75	25.4849	808286	182090	111737736	3.1096	0.0033	3.1228	0.0024	0.0263	0.0021	1352.16	20.9768	1327.2	7.2612	221526	55755.8	1147552	3.1335	0.0032	3.1343	0.0073	0.0444	0.0023	1515.94	14.5008
YLR024C	P1	I17	2.8938	0.0208	2.902	0.01	0.0393	0.0042	881.129	68.6724	798.771	18.0424	234158	116370	487249	2.963	0.045	2.9429	0.0269	0.0788	0.0019	1181.78	158.486	878.62	54.4818	863918	184715	51172987	2.8948	0.0053	2.9152	0.0088	0.0429	0.007	882.561	19.5012	824	16.519	273283	21908.9	1149323	2.9339	0.0027	2.9314	0.0102	0.0621	0.0087	1027.36	18.6187
YKL215C	P1	I18	3.1169	0.0189	3.1301	0.0151	0.0288	0.0031	1409.93	71.18	1349.35	46.4783	359522	36002.4	1247275	3.1672	0.0292	3.1602	0.0252	0.0492	0.0091	1692.36	158.807	1448.35	82.8189	952584	242843	123533914	3.1176	0.0174	3.1316	0.0161	0.0299	0.0003	1405.74	61.701	1355.47	48.2923	362624	48321.7	1278855	3.1393	0.0216	3.142	0.0203	0.0467	0.0004	1552.72	79.8741
YKL182W	P1	I19	4.3777	0.0057	4.4242	0.0038	0.0694	0.0002	26044.1	0.574	26556.3	247.738	3.76312e+07	2.59312e+07	383746	4.3333	0.0027	4.4016	0.0024	0.111	0.0007	25881.6	124.318	25222.1	152.561	9.11706e+07	3.43167e+07	40487615	4.3549	0.0357	4.4289	0.0071	0.0831	0.0223	26997.7	1231.77	26904.8	386.336	4.41313e+07	2.63609e+07	1184400	4.3515	0.0159	4.4239	0.011	0.1065	0.0065	27251.3	550.506
YDR301W	P1	I22	3.1334	0.0516	3.1475	0.0475	0.0237	0.0022	1453.6	170.455	1412.22	154.527	367366	36093.2	613668	3.1575	0.0405	3.1555	0.0425	0.045	0.0058	1640.1	115.396	1437.61	141.091	1.09368e+06	197695	62117360	3.0825	0.0036	3.0991	0.0029	0.0304	0.003	1290.73	28.3907	1257.95	7.5923	244763	55644.6	993840	3.1038	0.0032	3.1096	0.0049	0.0502	0.0037	1437.95	21.7417
YDR150W	P1	I23	3.1446	0.0026	3.1607	0.0097	0.0251	0.0004	1478.73	0.9871	1446.92	32.4321	389317	66195.5	1072742	3.1599	0.0049	3.1626	0.0126	0.0405	0.0001	1599.16	2.9103	1454.81	43.5697	920274	52921.8	105117276	3.1604	0.0292	3.1393	0.0074	0.0506	0.0193	2040.26	554.464	1380.14	22.046	3.65942e+06	2.06518e+06	1166,18	3.1846	0.0339	3.1727	0.0248	0.0519	0.0094	1804.53	218.35
YJR127C	P1	I24	3.0216	0.0094	3.0348	0.0062	0.0305	0.0041	1136.92	38.5185	1083.89	16.1256	296173	36027.1	1114834	3.0671	0.0089	3.0553	0.0067	0.0549	0.0058	1364.4	50.4121	1136.34	17.1166	885252	233670	111038249	3.0638	0.0821	3.0649	0.0631	0.0367	0.0026	1303.66	267.811	1174.64	169.942	377165	196920	1297,17	3.1162	0.0995	3.113	0.0921	0.0539	0.003	1556.62	371.142
YIL031W	P1	J1	2.9491	0.0071	2.9721	0.0021	0.0401	0.0061	975.488	21.1549	937.437	5.0423	201459	80260	571705	2.9793	0.0353	2.9873	0.0153	0.0738	0.0078	1172.53	111.567	972.01	33.5842	754913	162670	57648089	2.9604	0.0194	2.981	0.0159	0.0402	0.0022	1029.56	44.4563	959.007	34.7323	378991	46796.9	1315622	2.9949	0.0133	3.0022	0.0168	0.0638	0.0071	1186.38	35.8757
YIL017C	P1	J2	3.0115	0.0305	3.0357	0.0303	0.0446	0.0161	1156.12	125.92	1087.99	75.6015	435795	189666	563870	3.0517	0.0153	3.0591	0.0269	0.0658	0.0112	1335.45	56.1079	1148.48	71.6283	728253	25102.8	56868827	3.0326	0.0391	3.0441	0.0365	0.0374	0.0048	1194.38	119.487	1111.87	93.1229	352580	28603.3	1027433	3.076	0.0449	3.0746	0.0447	0.054	0.0028	1389.72	149.065
YER114C	P1	J3	3.205	0.009	3.2138	0.0082	0.0208	0.0067	1682.53	13.7607	1637.81	30.9691	298765	110877	610631	3.2327	0.0127	3.2287	0.0047	0.0398	0.009	1896.4	95.4597	1693.99	19.4329	882533	262521	62496762	3.2223	0.0258	3.226	0.0179	0.0269	0.0012	1763.96	107.686	1686.41	69.1692	390172	68989.7	1097708	3.2451	0.0332	3.2448	0.0284	0.0419	0.0033	1939.95	147.309
YPR135W	P1	J4	3.0761	0.0099	3.0879	0.0141	0.0442	0.0149	1330.29	72.2052	1224.99	38.5825	482147	111598	678782	3.1096	0.0024	3.1143	0.0137	0.0638	0.0114	1516.92	27.271	1300.53	40.9961	1.02456e+06	162576	68668374	3.0661	0.0047	3.0783	0.0033	0.0304	0.0004	1249.6	16.7314	1198	9.1471	295917	15871	1403672	3.0924	0.008	3.0954	0.0048	0.0483	0.0005	1400.85	28.9049
YDR017C	P1	J5	3.1875	0.0075	3.1953	0.0053	0.0205	0.0057	1618.01	42.9393	1568.74	18.5008	339967	122847	769595	3.2099	0.0159	3.2091	0.0141	0.0378	0.0052	1781.58	75.1007	1618.95	51.48	802825	159694	76276594	3.1983	0.002	3.2085	0.0044	0.0266	0.002	1664.51	14.5893	1617.02	17.5586	365998	44887.5	1337513	3.2238	0.0024	3.2251	0.0026	0.0443	0.0015	1855.15	7.1949
YMR124W	P1	J6	3.1186	0.0016	3.1351	0.0001	0.0233	0.0019	1386.47	10.8471	1364.86	0.6686	291723	123417	1505624	3.1557	0.0167	3.1545	0.0095	0.0421	0.0071	1606.8	100.889	1427.26	32.4947	841958	345823	150396629	3.1558	0.0147	3.1674	0.0133	0.0295	0.0001	1529.84	47.0297	1472.45	45.0477	380765	61021	899403	3.1779	0.024	3.1815	0.0247	0.0459	0.001	1686	92.9973
YKL157W	P1	J7	3.361	0.027	3.3748	0.0308	0.0234	0.0074	2415.28	169.326	2376.74	167.72	499373	115489	1384667	3.361	0.027	3.3705	0.0295	0.0372	0.0036	2489.27	140.721	2351.96	161.177	1.13499e+06	114055	140776491	3.3253	0.0217	3.3386	0.0218	0.0274	0.0012	2231.2	105.682	2186.55	111.871	506751	10731.4	1107513	3.3609	0.0175	3.3677	0.0229	0.0414	0.004	2508.57	95.4742
YIL137C	P1	J8	3.1758	0.0192	3.1887	0.0183	0.0335	0.0001	1624.59	74.4396	1546.21	64.8026	396949	53142	921952	3.2011	0.0189	3.2114	0.0136	0.0499	0.0002	1805.27	82.2916	1627.83	50.9697	953469	127467	92429705	3.1485	0.0114	3.1649	0.007	0.0364	0.001	1550.53	31.5983	1464.14	22.082	477364	38097.5	1005539	3.1822	0.0132	3.1853	0.0114	0.0526	0.0004	1749.21	41.2297
YBL076C	P1	J9	4.1334	0.0136	4.185	0.004	0.0617	0.0202	14908.5	84.8612	15309.8	149.805	1.11141e+07	4.66569e+06	980578	4.0888	0.0182	4.1586	0.0056	0.0907	0.0156	14446.2	108.344	14403	192.84	2.6958e+07	6.46917e+06	98215876	4.1068	0.0172	4.1688	0.0148	0.0531	0.0018	14186.1	437.899	14793.4	538.349	9.59581e+06	3.83108e+06	1477426	4.0566	0.0008	4.1447	0.0136	0.0888	0.0042	13575.2	139.891
YJR089W	P1	J10	2.9896	0.0466	2.9968	0.0238	0.0534	0.005	1214.4	199.089	994.202	54.6953	1.39888e+06	710226	1131457	3.032	0.061	3.0289	0.0349	0.0779	0.0015	1422.96	295.759	1072.24	85.2782	2.13716e+06	1.49551e+06	111475027	3.0111	0.007	3.014	0.0209	0.0419	0.0052	1245.65	100.469	1033.48	49.2231	1.22961e+06	939281	1514434	3.0481	0.0104	3.036	0.0231	0.0641	0.0045	1459.64	123.217
YDR291W	P1	J11	3.0358	0.0148	3.0509	0.0059	0.0504	0.0185	1263.44	17.4147	1123.46	15.3051	1.41487e+06	679241	1099511	3.0594	0.0314	3.0641	0.0161	0.0699	0.0171	1396	48.2745	1159.29	43.1983	1.58508e+06	578136	109954848	3.0185	0.0206	3.0211	0.0057	0.0448	0.0077	1200.8	23.6572	1050.99	14.7616	653545	197524	1515166	3.0536	0.0193	3.0487	0.0096	0.068	0.0098	1410.43	52.7161
YMR086W	P1	J12	3.3088	0.0148	3.3192	0.0192	0.0208	0.0028	2122.45	57.5429	2089.21	92.1112	432648	81395.9	1891802	3.3187	0.0137	3.3238	0.0148	0.0317	0.0029	2221.15	45.944	2110.08	71.1597	835613	27262.1	189888276	3.2986	0.006	3.3092	0.0001	0.0255	0.0011	2081.58	38.7457	2039.56	2.1653	518307	202729	1535358	3.3098	0.0113	3.3108	0.0054	0.0409	0.0037	2232.65	55.4313
YGR218W	P1	J13	3.5452	0.0068	3.5813	0.0063	0.0345	0.0102	3769.26	11.7547	3814.26	57.6116	1.22117e+06	46268.9	1578423	3.545	0.01	3.5622	0.0048	0.0463	0.0084	3882.86	49.919	3648.05	38.3258	2.78302e+06	351705	156925174	3.5143	0.0026	3.544	0.0033	0.0309	0.0014	3468.18	32.7782	3502.62	22.5681	1.02358e+06	342529	1834693	3.5251	0.0122	3.5479	0.014	0.0474	0.0011	3681.57	28.4816
YNL118C	P1	J14	3.421	0.003	3.4274	0.0014	0.024	0.0001	2744.99	46.2663	2674.03	9.623	578831	135007	1139658	3.4365	0.0105	3.4409	0.0061	0.0327	0.0019	2897.13	112.41	2761.36	40.2003	1.07746e+06	228407	112517597	3.4232	0.0102	3.436	0.0102	0.0242	0.0016	2751.44	54.8666	2732.22	67.5139	638658	121031	1349728	3.431	0.0121	3.4386	0.0126	0.0403	0.0017	2907.29	46.2785
YOL034W	P1	J15	3.0274	0.0304	3.0344	0.0204	0.0376	0	1187.57	94.3687	1083.03	50.7394	413191	74970.7	1127389	3.0608	0.0408	3.0577	0.0297	0.0626	0.0035	1375.34	133.973	1144.04	78.4215	911355	83984.7	110794436	3.0388	0.0169	3.0453	0.0075	0.0427	0.009	1241.33	11.8443	1110.31	20.0689	529984	61106.7	1586349	3.0706	0.0195	3.072	0.011	0.0638	0.0113	1401.94	34.3281
YMR275C	P1	J16	3.1073	0.0017	3.111	0.003	0.03	0.004	1384.03	22.9858	1292.23	8.4176	444985	4937.3	1341800	3.1288	0.0042	3.1307	0.0017	0.0436	0.0026	1500.04	36.7003	1351	6.0698	803462	141687	132467832	3.095	0.017	3.104	0.0116	0.0348	0.0055	1368.35	92.2711	1271.74	34.0958	559271	274172	1389406	3.122	0.0138	3.1225	0.0111	0.0563	0.0064	1546.51	83.9894
YOL045W	P1	J17	3.0694	0.0404	3.0745	0.0335	0.0356	0.004	1315.16	154.516	1190.26	91.2519	560862	288655	1627261	3.1013	0.0483	3.1043	0.0453	0.0532	0.0002	1465.48	167.406	1278.15	132.639	833410	211539	164283379	3.0734	0.0065	3.0811	0.0074	0.031	0.0009	1281.27	37.7807	1206.36	21.9653	447900	229454	1550464	3.0982	0.009	3.0958	0.0071	0.0529	0.001	1465.5	54.8621
YIR002C	P1	J18	3.0359	0.0449	3.0424	0.0314	0.0433	0.0002	1293.68	197.202	1105.7	79.3368	1.3037e+06	915280	1403301	3.0636	0.0436	3.0643	0.0373	0.062	0.0042	1399.7	148.578	1164.31	99.6782	1.38458e+06	394887	139833676	3.0358	0.0101	3.0516	0.0041	0.0336	0.0047	1170.23	14.0688	1126.56	11.8852	242384	4815.53	1227453	3.0658	0.0119	3.0691	0.0119	0.0539	0.0045	1362.23	51.2626
YER110C	P1	J19	4.0295	0.0145	4.0652	0.0078	0.0541	0.0026	11592.2	463.758	11623.8	206.608	9.39808e+06	5.63334e+06	957567	4.015	0.025	4.0547	0.0203	0.0694	0.0033	11689.3	678.732	11356.9	533.632	1.83815e+07	7.44707e+06	94435934	3.9943	0.0054	4.0324	0.0067	0.0427	0.0041	10741.6	33.9816	10792.1	177.06	7.13879e+06	3.29552e+06	837624	3.9659	0.0043	4.0126	0.0018	0.0705	0.0009	10623.5	68.6869
YOR048C	P1	J20	3.2292	0.0072	3.2354	0.0074	0.028	0.0062	1842.41	74.3422	1721.1	29.4879	836601	323976	1305743	3.2461	0.0101	3.2475	0.0085	0.0404	0.0061	1965.76	88.1733	1767.87	34.4613	1.52583e+06	783837	129328248	3.2539	0.0221	3.2617	0.0168	0.03	0.0031	1950.04	148.114	1830.8	72.0716	899953	484727	1171616	3.2645	0.0244	3.2664	0.02	0.0455	0.004	2082.84	163.668
YOR304W	P1	J21	3.1747	0.0503	3.1721	0.0369	0.0309	0.0059	1633.6	228.056	1491.34	125.252	708653	382285	954485	3.2028	0.0522	3.1898	0.0412	0.0484	0.0051	1841.8	262.951	1554.29	147.477	1.53284e+06	680258	94725424	3.092	0.0481	3.1042	0.0528	0.0291	0.0003	1335.36	146.141	1282.31	155.591	466789	153668	692685	3.1165	0.0393	3.1103	0.0493	0.0459	0.0022	1477.72	105.132
YDR028C	P1	J22	3.245	0.005	3.2575	0.0135	0.023	0.0065	1847.46	33.6199	1810.62	55.9309	334231	22413.6	361535	3.2775	0.0125	3.2704	0.0244	0.0384	0.0065	2080.64	63.6676	1865.94	103.56	953843	8476.95	36436091	3.2687	0.0081	3.2831	0.0075	0.0264	0.0002	1944.59	45.3122	1920.55	32.0021	361153	55255.6	1255737	3.2848	0.0111	3.2846	0.0076	0.0442	0.0008	2131.49	70.7481
YKL105C	P1	J23	3.0401	0.0281	3.0569	0.0259	0.0281	0.0035	1171.92	58.4	1142.29	68.5443	219220	36756.5	1266687	3.0743	0.0263	3.0814	0.0244	0.0498	0.0029	1350.41	66.6009	1208	68.5399	646923	28071.3	124546837	3.1223	0.1042	3.1205	0.0808	0.0453	0.0008	1589.28	403.219	1343.97	247.606	832151	325950	1275,24	3.1714	0.1204	3.1785	0.1213	0.0611	0.0099	1795.07	423.362
YMR259C	P1	K1	3.1547	0.0573	3.168	0.055	0.0233	0.0071	1520.21	177.255	1484.86	186.62	260048	9725.89	461903	3.1837	0.0473	3.1873	0.0397	0.0418	0.0079	1708.77	155.889	1546.8	141.309	786977	5706.72	47449356	3.1609	0.0373	3.1776	0.0303	0.0287	0.0027	1545.41	118.489	1510.73	103.485	315105	187.394	1172419	3.1914	0.0375	3.1949	0.0334	0.0449	0.0064	1744.55	116.879
YGR097W	P1	K2	3.0835	0.0055	3.094	0.003	0.0314	0.0001	1316.79	35.3413	1241.43	7.6761	447810	233323	1142562	3.1228	0.0038	3.115	0.005	0.0534	0.0014	1543.1	26.3975	1303.47	15.8173	1.04092e+06	88127.6	112766354	3.1111	0.0154	3.1222	0.0203	0.0325	0.0004	1402.12	42.5607	1326.7	63.1413	456306	63549.9	1131603	3.1467	0.01	3.1495	0.0101	0.0512	0.0007	1599.2	30.5452
YDL112W	P1	K3	3.1276	0.0094	3.1406	0.0084	0.0221	0.0046	1415.1	21.3836	1382.67	27.9212	315219	40746.3	1150583	3.1451	0.0119	3.1488	0.0052	0.0391	0.0054	1541.43	34.7295	1408.48	17.7887	617075	8385.91	115356653	3.1106	0.0101	3.1203	0.0116	0.0301	0.0024	1375.8	15.3416	1321.09	37.0015	277044	38696.6	1088746	3.1466	0.0006	3.15	0.002	0.0478	0.002	1574.46	11.0477
YKL038W	P1	K4	3.0123	0.0113	3.0298	0.0108	0.0275	0.0002	1099.67	30.1235	1071.89	25.9649	189513	43799.1	1278577	3.0245	0.0075	3.0326	0.0046	0.0515	0.0018	1213.83	22.8616	1078.85	11.2666	560788	54614.3	128215960	3.0103	0.022	3.0254	0.0236	0.0321	0.0004	1101.74	65.4273	1061.61	58.0289	212395	73541.6	1121505	3.0608	0.0312	3.0619	0.0315	0.0505	0.0005	1314.48	102.631
YER164W	P1	K5	3.2354	0.0146	3.2484	0.0056	0.0192	0.0061	1793.63	45.443	1771.02	21.6497	345489	116297	875615	3.2549	0.0161	3.2579	0.0091	0.0327	0.0046	1932.44	79.433	1812.14	39.2561	709165	10946.4	88326774	3.2412	0.005	3.2521	0.0045	0.0276	0.0002	1831.52	20.7009	1789.64	16.9736	366927	6459.63	1364670	3.2618	0.0081	3.2637	0.0056	0.0398	0.0038	1996.06	30.1271
YBR218C	P1	K6	3.743	0.001	3.7719	0.0041	0.0376	0.0011	5855.08	42.8527	5912.01	56.97	2.02518e+06	741758	1389666	3.7508	0.0008	3.774	0.003	0.0444	0.0027	6062.95	77.5017	5940.76	42.8216	4.12794e+06	1.3814e+06	138487269	3.7396	0.0066	3.7627	0.0035	0.0294	0.0026	5776.49	58.4549	5802.54	55.7338	1.90585e+06	451980	954589	3.7371	0.0048	3.7563	0.0013	0.0458	0.0059	5941.18	76.0303
YBL034C	P1	K7	3.0264	0.0824	3.0179	0.0519	0.0571	0.0056	1303.69	303.92	1050.3	125.172	744071	333773	1237150	3.0986	0.0966	3.0953	0.0963	0.0764	0.0013	1613.5	385.774	1275.43	277.501	1.40041e+06	463497	122742181	3.0303	0.0271	3.0242	0.0253	0.0451	0.0008	1270.33	42.0793	1059.38	60.8025	782721	167115	413320	3.0588	0.022	3.0356	0.0331	0.0657	0.0023	1442.53	3.1966
YAR009C	P1	K8	3.0796	0.0124	3.0874	0.0156	0.0431	0.0061	1348.48	44.6798	1225.01	43.8106	558877	34793.7	888441	3.0998	0.0122	3.1108	0.0102	0.0579	0.004	1462.67	48.1093	1291.75	29.5446	796385	106640	87605069	3.1391	0.0195	3.1382	0.0197	0.0431	0.0025	1567.33	49.1941	1376.32	62.8616	690745	136287	1132485	3.1657	0.0281	3.1642	0.0296	0.0639	0.0045	1758.71	103.637
YLR247C	P1	K9	2.9485	0.0035	2.9701	0.0031	0.0283	0.0001	961.84	20.1671	934.214	6.9572	394309	283697	1553559	2.9804	0.0114	2.9842	0.0072	0.0528	0.0009	1112.21	43.4026	964.07	16.5244	576930	106278	154735900	2.9777	0.0279	2.9971	0.03	0.0322	0.0009	1025	66.079	996.431	68.2463	199668	8094.24	1118583	3.0122	0.0305	3.0142	0.0287	0.0504	0.0002	1183.72	71.076
YPL110C	P1	K10	2.9999	0.0029	3.0168	0.0038	0.0324	0.0041	1086.26	0.085	1040.48	9.1454	273839	33624	1242660	3.0355	0.0045	3.0381	0.0049	0.05	0.0006	1244.05	7.3601	1091.23	11.8347	579246	28184.4	123316897	3.0049	0.0118	3.0225	0.013	0.0312	0.0008	1087.29	27.2408	1055.05	31.7381	211699	27716.6	1194566	3.0399	0.0102	3.043	0.0125	0.0493	0.0001	1251.31	38.4168
YOR191W	P1	K11	2.9623	0.0073	2.9772	0.0022	0.0341	0.0009	1019.18	52.4656	948.644	4.1486	505894	366578	1399474	2.9921	0.0051	2.9947	0.0047	0.0484	0.0037	1129.02	36.0704	988.099	10.1869	582933	173201	140505080	3.0129	0.0214	3.0257	0.0364	0.039	0.0016	1166.33	4.3011	1064.15	88.5977	532252	330899	945481	3.0405	0.0227	3.0365	0.0321	0.0536	0.0046	1299.32	0.6134
YMR304W	P1	K12	3.2162	0.0058	3.2324	0.0006	0.0215	0.005	1721.11	17.4947	1708.48	1.5312	251102	8384.76	1062521	3.243	0.003	3.2393	0.0017	0.039	0.0079	1940.28	20.2845	1734.29	7.9179	1.14852e+06	322103	104865773	3.1861	0.0179	3.193	0.011	0.0264	0.0014	1618.88	68.0829	1561.07	37.3193	339083	55176.4	850572	3.2109	0.0171	3.2081	0.0125	0.0444	0.0016	1808.06	72.5563
YOR341W	P1	K13	3.7	0.016	3.7258	0.0168	0.0276	0.0039	5231.52	151.098	5324.52	208.878	1.52952e+06	449275	1372548	3.6683	0.0017	3.6972	0.0062	0.041	0.0079	5009.57	20.7961	4983.62	72.2819	2.76371e+06	428564	136466110	3.6822	0.0076	3.707	0.011	0.0317	0.0009	5107.37	40.911	5101.4	135.079	1.87137e+06	599269	1399702	3.6765	0.0007	3.6983	0	0.0483	0.0027	5250.23	12.6277
YOR227W	P1	K14	3.0615	0.0005	3.0669	0.0011	0.0238	0.0064	1232.37	24.8293	1166.53	3.2424	298438	143628	1415614	3.0854	0.0056	3.0791	0.0009	0.0448	0.0039	1385.92	6.278	1200.11	2.9851	760674	13253.1	141536736	3.0647	0.0013	3.0667	0.0061	0.0308	0.0045	1267.64	39.518	1166.47	15.8119	459898	252694	1207535	3.0845	0.0039	3.0778	0.0052	0.0469	0.0026	1382.72	9.5464
YER132C	P1	K15	3.1522	0.0278	3.1621	0.0239	0.027	0.002	1519.57	97.7611	1455.04	81.3431	381535	84480.2	652420	3.1859	0.0211	3.185	0.019	0.0446	0.0045	1726.84	66.6532	1532.04	66.7825	864435	20323.2	64434802	3.1625	0.0117	3.1737	0.0109	0.032	0.0029	1565.52	62.9325	1493.13	35.278	487722	155635	1270561	3.1883	0.0154	3.1891	0.0134	0.0477	0.0006	1739.03	74.8898
YPL231W	P1	K17	4.1409	0.0191	4.1835	0.0005	0.059	0.0219	15097.7	312.238	15255.7	27.0025	1.23036e+07	6.16776e+06	1142531	4.1265	0.0265	4.1752	0.0058	0.079	0.0207	15458.9	404.657	14964.3	206.165	3.35607e+07	1.0353e+07	113665501	4.2014	0.0304	4.2546	0.0006	0.0597	0.0105	18079.6	462.483	18013.9	5.6158	2.1525e+07	1.22097e+07	1167742	4.1849	0.0213	4.2432	0.0054	0.0877	0.0156	17973.6	73.6003
YCR093W	P1	K19	3.4609	0.0221	3.4655	0.0145	0.0243	0.0052	3040.58	159.793	2922.3	99.0456	978511	323456	1269524	3.4737	0.0303	3.4721	0.0189	0.0335	0.0058	3199.1	248.364	2969.93	131.054	2.16491e+06	1.05394e+06	125776155	3.4439	0.0041	3.4539	0.0029	0.0242	0.0018	2887.71	15.0245	2847.67	22.6174	721353	229186	1232790	3.4526	0.0096	3.4552	0.0101	0.0396	0.0044	3071.61	56.2234
YBR081C	P1	K20	3.1222	0.0032	3.1296	0.0086	0.0274	0.0018	1419.46	13.4131	1348.75	26.5407	336950	54266.6	706458	3.1663	0.0093	3.1549	0.0049	0.0519	0.0035	1711.53	63.3725	1429.78	15.6161	1.30419e+06	124139	69085203	3.1346	0.0033	3.1446	0.0002	0.0279	0.0004	1442.89	9.9672	1396.76	0.1039	289443	19979.4	879792	3.1573	0.0101	3.1558	0.0084	0.045	0.0011	1602.66	36.579
YLR430W	P1	K21	3.1088	0.0032	3.114	0.009	0.0303	0.0038	1407.29	20.2125	1301.22	27.4	582378	261898	1318549	3.151	0.004	3.1443	0.0023	0.0518	0.0022	1639.34	32.3952	1394.62	6.9062	1.05795e+06	119307	131046329	3.1326	0.0187	3.151	0.02	0.0304	0.0003	1464.32	63.6214	1418.04	63.8642	594979	142954	939737	3.1526	0.0074	3.1562	0.007	0.0497	0.0002	1620.22	20.0673
YGR061C	P1	K22	3.8235	0.0025	3.8727	0.0227	0.0572	0.0143	7371.64	206.903	7474.14	388.155	4.26147e+06	1.34513e+06	1214308	3.8041	0.0199	3.8574	0.0054	0.0671	0.0162	7285.9	113.558	7204.16	90.3849	7.721e+06	1.29471e+06	121543961	3.887	0.0456	3.9335	0.0294	0.0449	0.0051	8506.05	655.219	8613.77	591.576	4.96163e+06	1.66953e+06	9171029	3.8577	0.0497	3.9106	0.0356	0.0707	0.0073	8320.47	684.832
YBL047C	P1	K24	3.6873	0.0097	3.7318	0.0028	0.0431	0.01	5267.91	31.1638	5389.28	35.0138	1.99052e+06	291396	925346	3.6972	0.0088	3.7325	0.0025	0.051	0.0087	5476.92	77.0078	5401.81	30.2508	3.8823e+06	691743	93243456	3.5582	0.0694	3.5907	0.0665	0.0403	0.0114	4056.25	441.866	3949.14	595.854	1.73576e+06	195657	656,9	3.6253	0.0157	3.6521	0.013	0.0764	0.0274	5367.05	817.74
YNL327W	P1	L3	3.4188	0.0142	3.451	0.004	0.0326	0.0089	2816.5	54.9449	2824.91	25.9309	805729	96465.5	409386	3.4156	0.0254	3.446	0.001	0.0389	0.0115	2834.75	134.183	2794.89	7.487	1.40119e+06	175698	41474297	3.4928	0.0348	3.5263	0.0471	0.0328	0.0059	3335.36	321.573	3385.09	370.547	909254	172220	1133309	3.4791	0.0249	3.5069	0.037	0.0471	0.0072	3333.6	224.672
YER075C	P1	L4	3.0812	0.0358	3.0864	0.0276	0.0361	0.0073	1328.47	128.67	1223.22	77.8463	464589	88888.5	575537	3.1105	0.0295	3.1121	0.0309	0.0458	0.002	1454.9	87.1574	1297.21	92.741	622160	17793.8	57435630	3.0642	0.0056	3.0778	0.0066	0.033	0.0024	1258.6	28.9923	1197.19	17.0131	383626	68224.3	1154518	3.0905	0.0127	3.0926	0.0124	0.0502	0.0019	1403.78	47.8244
YDR325W	P1	L5	3.0481	0.0069	3.0644	0.0106	0.0283	0.0002	1200.85	14.2197	1160.6	27.3576	312688	79771.9	1485762	3.0741	0.0029	3.0786	0.0024	0.0441	0.001	1331.87	8.737	1198.97	6.9014	597643	6583.72	151167775	3.0594	0.0009	3.0759	0.0086	0.0336	0.0033	1247.32	12.001	1190.91	22.7416	354884	69123.2	1368604	3.0873	0.002	3.0916	0.0058	0.0501	0.0032	1386.5	15.4301
YLR129W	P1	L6	3.061	0.002	3.0734	0.0026	0.0326	0.0062	1245.03	29.063	1183.76	7.7515	321600	69421.1	1220883	3.0981	0.0101	3.0968	0.0008	0.0523	0.0008	1439.91	41.2849	1249.47	2.0885	731453	82668.9	122738925	3.0488	0.0049	3.0613	0.008	0.0342	0.0035	1219.66	3.5621	1151.94	21.4319	343469	8959.72	1222451	3.0774	0.0072	3.0778	0.0062	0.0531	0.0044	1374.02	38.4274
YML010W	P1	L7	3.4802	0.0002	3.5036	0.0076	0.0239	0.0085	3155.02	31.0988	3189.48	59.0837	603367	66829.5	1309502	3.4905	0.0095	3.5038	0.0148	0.0338	0.0098	3303.06	99.7427	3189.12	108.772	1.36227e+06	216228	130525094	3.5096	0.0142	3.5318	0.0175	0.0275	0.0028	3386.66	119.245	3410.83	141.086	805321	23898.4	1422347	3.5161	0.0117	3.5299	0.016	0.0394	0.0061	3523.66	97.3483
YIL002C	P1	L8	3.0849	0.0041	3.088	0.009	0.0329	0.001	1328.21	8.3899	1224.4	25.4558	380367	6773.02	915282	3.1149	0.0129	3.1079	0.0039	0.0484	0.0074	1491.8	87.0463	1281.89	12.1925	707455	220824	89053228	3.0603	0.0144	3.0696	0.0129	0.0304	0.0006	1237.75	45.8414	1174.64	34.6743	327889	14376.8	1440473	3.0914	0.0099	3.0897	0.0029	0.0489	0.0001	1402.68	36.2733
YGL178W	P1	L9	3.2273	0.0123	3.247	0.02	0.0256	0.0018	1783.71	45.1074	1767.71	80.7718	360968	1025.33	1333427	3.233	0.008	3.243	0.015	0.0439	0.0009	1893.19	24.6623	1751.26	60.4253	871796	4034.85	131834852	3.2566	0.0135	3.2724	0.0143	0.0298	0.0004	1925.26	74.8292	1873.36	60.0571	455097	76509.6	1019452	3.2795	0.0239	3.2857	0.0228	0.0492	0.001	2148.93	118.709
YGR140W	P1	L10	3.0805	0.0095	3.089	0.011	0.029	0.0011	1297.38	22.121	1228.06	30.2183	374142	74639.7	1626721	3.095	0.01	3.1004	0.0084	0.0445	0.0003	1393.72	31.0231	1261.02	23.6531	577087	61146.5	161157453	3.1036	0.0189	3.1098	0.0145	0.028	0.0001	1346.8	62.5322	1288.57	42.6495	284917	58324	1530342	3.1309	0.0161	3.1268	0.0107	0.0462	0.0024	1526.11	52.6351
YHR119W	P1	L11	3.0642	0.0072	3.0674	0.0074	0.0284	0.0002	1249.37	12.8533	1167.69	19.2693	323838	42431.2	821302	3.1054	0.0234	3.1031	0.0221	0.0475	0.002	1447.76	80.345	1268.79	64.8603	723296	5336.68	80213394	3.0998	0.0208	3.104	0.0203	0.0322	0.0024	1368.94	78.1255	1273.34	59.6648	413008	35002.3	1244247	3.1356	0.016	3.1311	0.015	0.0526	0.0018	1578.16	68.4474
YDL190C	P1	L12	3.2557	0.0203	3.2679	0.0161	0.0202	0.007	1885.8	68.541	1855.96	69.3421	333174	70146.8	1012589	3.2745	0.0095	3.2746	0.0104	0.0378	0.0083	2069.76	5.6335	1882.51	46.7959	1.1566e+06	335490	103726904	3.2306	0.0008	3.2365	0.0043	0.0239	0.0028	1767.62	12.6681	1724.1	18.4964	285027	24871.1	1328726	3.251	0.0021	3.2489	0.0035	0.0392	0.0046	1941.42	7.0768
YLR223C	P1	L13	3.1381	0.0101	3.1492	0.0142	0.0196	0.0035	1435.82	30.4155	1411.09	46.5047	230169	28711.7	1271579	3.1547	0.0167	3.1582	0.0212	0.034	0.0043	1545.79	57.4622	1440.49	69.9224	516090	40535.8	124755963	3.1675	0.0057	3.1717	0.0065	0.0286	0.0035	1567.63	47.4688	1486.03	23.9003	406945	151244	1404372	3.1814	0	3.1776	0.0038	0.044	0.0023	1703.97	14.602
YIR023W	P1	L14	3.0909	0.0091	3.0935	0.0025	0.0251	0.0004	1312.38	40.6314	1241.18	6.9411	296825	68349.5	1135733	3.1115	0.0065	3.1114	0.0004	0.0395	0.0025	1435.01	20.451	1291.3	1.2648	978841	343364	115927550	3.1037	0.0035	3.1098	0.0048	0.0289	0.0034	1364.13	15.9972	1289.26	13.3636	431273	185555	1446374	3.1245	0.0008	3.1243	0.0022	0.0455	0.0013	1491.82	1.5669
YER111C	P1	L15	3.0678	0.0088	3.0779	0.0079	0.027	0.0005	1246.46	19.0243	1197.9	21.6514	251656	4028.31	908461	3.0945	0.0225	3.0964	0.0154	0.0467	0.0041	1414.35	96.0882	1249.98	44.1065	717826	189746	90834774	3.0815	0.0055	3.0937	0.0035	0.0312	0.0017	1300.77	28.3503	1241.04	10.1487	331832	12037.5	1172429	3.1087	0.0215	3.1092	0.0168	0.0493	0.0006	1464.97	77.4383
[truncated: 2,999 more rows]
[truncated: 29 more columns]

## Sheet: Imaging GFP
#ORF	Plate	Well	BYxBY_mean	BYxBY_median	BYxBY_ncells	BYxBY_bestrec_var	BYxBY_bestrec_npairs	BYxBY_near_var	BYxBY_near_npairs	BYxBY_far_var	BYxBY_far_npairs	RMxBY_mean	RMxBY_median	RMxBY_ncells	RMxBY_bestrec_var	RMxBY_bestrec_npairs	RMxBY_near_var	RMxBY_near_npairs	RMxBY_far_var	RMxBY_far_npairs	Any_far_var	Any_far_npairs
[truncated: 3,396 more rows]

[truncated: 1 more sheets: mRNA-seq coverage]
