# Supplementary material for: Heritability and genetic basis of protein level variation in an outbred population
Source: HighWire-hosted journal article supplement (doi:10.1101/gr.170506.113), 2014-05-13
Supplement: Supplemental_Table_S3.xlsx [file Supplemental_Table_S3.xlsx]

## Sheet: RMxBY GFP lower than BYxBY
#		p-value		T	Q	Q&T	Q&T/Q	Q&T/T	term ID		t type	t group	t name and depth in group		Q&T list
#
1	!	0.0168	9	5	2	0.4	0.222	GO:0006616	BP	26	SRP-dependent cotranslational protein targeting to membrane, translocation	1	YBL075C,YER103W
1	!	0.0389	8	58	3	0.052	0.375	GO:0007009	BP	1	plasma membrane organization	1	YFL014W,YPR149W,YMR251W-A
1	!	0.0306	218	96	13	0.135	0.06	GO:0006091	BP	30	generation of precursor metabolites and energy	1	YAL054C,YGR254W,YER178W,YMR105C,YNL052W,YML070W,YBR026C,YMR083W,YKL192C,YEL011W,YAL038W,YNR001C,YER177W
1	!	0.00131	1135	96	38	0.396	0.033	GO:0050896	BP	16	response to stimulus	1	YBL075C,YPL223C,YER103W,YDL022W,YER028C,YFL014W,YLR109W,YGR038W,YMR173W,YBR169C,YDR258C,YPL240C,YIR037W,YGR008C,YML070W,YDR533C,YBR126C,YBL064C,YDR074W,YML100W,YLR178C,YMR251W-A,YDL124W,YDL137W,YGL097W,YIL121W,YBL047C,YER062C,YMR092C,YPL004C,YDR171W,YLR025W,YNL007C,YHR104W,YFL016C,YIL105C,YDR121W,YER177W
1	!	0.00333	135	89	11	0.124	0.081	GO:0009628	BP	16	response to abiotic stimulus	2	YDL022W,YER028C,YFL014W,YDR258C,YPL240C,YGR008C,YER062C,YMR092C,YPL004C,YLR025W,YFL016C
1	!	4.82e-06	757	96	34	0.354	0.045	GO:0006950	BP	16	response to stress	2	YBL075C,YPL223C,YER103W,YDL022W,YER028C,YFL014W,YLR109W,YGR038W,YMR173W,YBR169C,YDR258C,YPL240C,YIR037W,YGR008C,YML070W,YDR533C,YBR126C,YBL064C,YDR074W,YML100W,YMR251W-A,YDL124W,YDL137W,YBL047C,YER062C,YMR092C,YPL004C,YDR171W,YLR025W,YNL007C,YHR104W,YFL016C,YDR121W,YER177W
1	!	0.00402	868	95	31	0.326	0.036	GO:0009056	BP	24	catabolic process	1	YBR117C,YDL022W,YMR174C,YMR303C,YGR254W,YDR001C,YER178W,YBR118W,YPR127W,YGR256W,YAL044C,YOR173W,YGR019W,YGR248W,YMR105C,YGR043C,YML070W,YMR169C,YMR189W,YMR083W,YER021W,YDL137W,YDR019C,YAL038W,YNR001C,YCL064C,YLR025W,YNL007C,YHR104W,YFL016C,YMR278W
1	!	0.000147	1282	96	43	0.448	0.034	GO:0044710	BP	24	single-organism metabolic process	1	YBR117C,YAL054C,YDL022W,YMR303C,YNL134C,YER178W,YAL061W,YLR109W,YBR118W,YPR127W,YGR256W,YAL044C,YGR038W,YGR019W,YGR248W,YOR374W,YNL071W,YMR105C,YIR037W,YGR043C,YNL052W,YML070W,YMR169C,YDL182W,YBL064C,YBR026C,YDR032C,YMR189W,YMR083W,YDL124W,YKL192C,YEL011W,YDR019C,YAL038W,YER062C,YNR001C,YGL009C,YCL064C,YBR039W,YOL151W,YNL325C,YHR104W,YER177W
1	!	0.000102	857	83	31	0.373	0.036	GO:0044281	BP	24	small molecule metabolic process	2	YBR117C,YAL054C,YDL022W,YMR303C,YER178W,YBR118W,YPR127W,YGR256W,YAL044C,YGR019W,YGR248W,YOR374W,YNL071W,YMR105C,YGR043C,YML070W,YMR169C,YDL182W,YBR026C,YMR189W,YMR083W,YDL124W,YKL192C,YDR019C,YAL038W,YER062C,YNR001C,YGL009C,YCL064C,YBR039W,YOL151W
1	!	0.000905	410	80	19	0.237	0.046	GO:0006082	BP	24	organic acid metabolic process	3	YAL054C,YMR303C,YER178W,YGR256W,YAL044C,YGR019W,YOR374W,YNL071W,YMR169C,YDL182W,YBR026C,YMR189W,YMR083W,YKL192C,YDR019C,YAL038W,YNR001C,YGL009C,YCL064C
1	!	0.000872	409	80	19	0.237	0.046	GO:0043436	BP	24	oxoacid metabolic process	4	YAL054C,YMR303C,YER178W,YGR256W,YAL044C,YGR019W,YOR374W,YNL071W,YMR169C,YDL182W,YBR026C,YMR189W,YMR083W,YKL192C,YDR019C,YAL038W,YNR001C,YGL009C,YCL064C
1	!	0.008	106	80	9	0.113	0.085	GO:0044712	BP	24	single-organism catabolic process	2	YMR303C,YPR127W,YAL044C,YGR019W,YML070W,YMR189W,YMR083W,YDR019C,YCL064C
1	!	0.008	106	80	9	0.113	0.085	GO:0044282	BP	24	small molecule catabolic process	3	YMR303C,YPR127W,YAL044C,YGR019W,YML070W,YMR189W,YMR083W,YDR019C,YCL064C
1	!	2.51e-09	444	96	30	0.312	0.068	GO:0055114	BP	24	oxidation-reduction process	2	YBR117C,YAL054C,YDL022W,YMR303C,YNL134C,YER178W,YAL061W,YLR109W,YPR127W,YGR256W,YGR248W,YOR374W,YMR105C,YIR037W,YGR043C,YNL052W,YML070W,YMR169C,YBL064C,YBR026C,YDR032C,YMR189W,YMR083W,YDL124W,YKL192C,YEL011W,YNR001C,YOL151W,YHR104W,YER177W
1	!	0.000745	760	95	30	0.316	0.039	GO:1901575	BP	24	organic substance catabolic process	1	YBR117C,YDL022W,YMR174C,YMR303C,YGR254W,YDR001C,YER178W,YBR118W,YPR127W,YGR256W,YAL044C,YOR173W,YGR019W,YGR248W,YMR105C,YGR043C,YML070W,YMR169C,YMR189W,YMR083W,YER021W,YDR019C,YAL038W,YNR001C,YCL064C,YLR025W,YNL007C,YHR104W,YFL016C,YMR278W
1	!	0.000253	343	96	20	0.208	0.058	GO:0005975	BP	24	carbohydrate metabolic process	1	YBR117C,YDL022W,YGR254W,YDR001C,YER178W,YGR256W,YGR248W,YMR105C,YGR043C,YML070W,YBR126C,YDR074W,YML100W,YEL011W,YAL038W,YER062C,YNR001C,YHR104W,YMR278W,YER177W
1	!	0.000177	273	96	18	0.188	0.066	GO:0044723	BP	24	single-organism carbohydrate metabolic process	2	YBR117C,YGR254W,YDR001C,YER178W,YGR256W,YGR248W,YMR105C,YGR043C,YML070W,YBR126C,YDR074W,YML100W,YEL011W,YAL038W,YER062C,YHR104W,YMR278W,YER177W
1	!	0.015	121	95	10	0.105	0.083	GO:0005996	BP	24	monosaccharide metabolic process	3	YBR117C,YGR254W,YER178W,YGR256W,YGR248W,YMR105C,YGR043C,YAL038W,YHR104W,YMR278W
1	!	0.00953	115	95	10	0.105	0.087	GO:0019318	BP	24	hexose metabolic process	4	YBR117C,YGR254W,YER178W,YGR256W,YGR248W,YMR105C,YGR043C,YAL038W,YHR104W,YMR278W
1	!	0.0188	99	95	9	0.095	0.091	GO:0006006	BP	24	glucose metabolic process	5	YBR117C,YGR254W,YER178W,YGR256W,YGR248W,YMR105C,YGR043C,YAL038W,YMR278W
1	!	0.0281	44	52	5	0.096	0.114	GO:0009311	BP	24	oligosaccharide metabolic process	3	YDR001C,YMR105C,YBR126C,YDR074W,YML100W
1	!	0.000144	7	52	4	0.077	0.571	GO:0009312	BP	24	oligosaccharide biosynthetic process	4	YMR105C,YBR126C,YDR074W,YML100W
1	!	0.000236	105	88	11	0.125	0.105	GO:0016052	BP	24	carbohydrate catabolic process	2	YBR117C,YGR254W,YDR001C,YER178W,YGR256W,YGR248W,YMR105C,YGR043C,YML070W,YAL038W,YHR104W
1	!	0.000115	98	88	11	0.125	0.112	GO:0044724	BP	24	single-organism carbohydrate catabolic process	3	YBR117C,YGR254W,YDR001C,YER178W,YGR256W,YGR248W,YMR105C,YGR043C,YML070W,YAL038W,YHR104W
1	!	0.000243	64	88	9	0.102	0.141	GO:0046365	BP	24	monosaccharide catabolic process	4	YBR117C,YGR254W,YER178W,YGR256W,YGR248W,YMR105C,YGR043C,YAL038W,YHR104W
1	!	0.000101	58	88	9	0.102	0.155	GO:0019320	BP	24	hexose catabolic process	5	YBR117C,YGR254W,YER178W,YGR256W,YGR248W,YMR105C,YGR043C,YAL038W,YHR104W
1	!	0.00192	52	72	7	0.097	0.135	GO:0006007	BP	24	glucose catabolic process	6	YBR117C,YGR254W,YER178W,YGR256W,YGR248W,YGR043C,YAL038W
1	!	5.07e-06	62	59	9	0.153	0.145	GO:0072524	BP	24	pyridine-containing compound metabolic process	1	YBR117C,YDL022W,YMR303C,YPR127W,YGR256W,YGR248W,YOR374W,YGR043C,YMR083W
1	!	6.97e-05	164	75	13	0.173	0.079	GO:0051186	BP	24	cofactor metabolic process	1	YBR117C,YAL054C,YDL022W,YMR303C,YER178W,YGR256W,YGR248W,YOR374W,YNL071W,YGR043C,YMR083W,YKL192C,YNR001C
1	!	1.13e-05	141	75	13	0.173	0.092	GO:0006732	BP	24	coenzyme metabolic process	2	YBR117C,YAL054C,YDL022W,YMR303C,YER178W,YGR256W,YGR248W,YOR374W,YNL071W,YGR043C,YMR083W,YKL192C,YNR001C
1	!	0.000144	65	59	8	0.136	0.123	GO:0006733	BP	24	oxidoreduction coenzyme metabolic process	3	YBR117C,YDL022W,YMR303C,YGR256W,YGR248W,YOR374W,YGR043C,YMR083W
1	!	2.02e-05	51	59	8	0.136	0.157	GO:0019362	BP	24	pyridine nucleotide metabolic process	4	YBR117C,YDL022W,YMR303C,YGR256W,YGR248W,YOR374W,YGR043C,YMR083W
1	!	1.72e-05	50	59	8	0.136	0.16	GO:0046496	BP	24	nicotinamide nucleotide metabolic process	5	YBR117C,YDL022W,YMR303C,YGR256W,YGR248W,YOR374W,YGR043C,YMR083W
1	!	0.00018	22	39	5	0.128	0.227	GO:0006739	BP	24	NADP metabolic process	6	YBR117C,YGR256W,YGR248W,YOR374W,YGR043C
1	!	8.05e-05	19	39	5	0.128	0.263	GO:0006740	BP	24	NADPH regeneration	7	YBR117C,YGR256W,YGR248W,YOR374W,YGR043C
1	!	0.00165	15	39	4	0.103	0.267	GO:0006098	BP	24	pentose-phosphate shunt	8	YBR117C,YGR256W,YGR248W,YGR043C
1	!	0.0492	166	96	11	0.115	0.066	GO:0044262	BP	24	cellular carbohydrate metabolic process	1	YDR001C,YGR256W,YMR105C,YML070W,YBR126C,YDR074W,YML100W,YEL011W,YER062C,YNR001C,YER177W
1	!	0.00404	30	52	5	0.096	0.167	GO:0005984	BP	24	disaccharide metabolic process	2	YDR001C,YMR105C,YBR126C,YDR074W,YML100W
1	!	1.48e-05	11	52	5	0.096	0.455	GO:0005991	BP	24	trehalose metabolic process	3	YDR001C,YMR105C,YBR126C,YDR074W,YML100W
1	!	0.0308	59	96	7	0.073	0.119	GO:0034637	BP	24	cellular carbohydrate biosynthetic process	2	YMR105C,YBR126C,YDR074W,YML100W,YEL011W,YER062C,YER177W
1	!	0.000144	7	52	4	0.077	0.571	GO:0046351	BP	24	disaccharide biosynthetic process	3	YMR105C,YBR126C,YDR074W,YML100W
1	!	0.000144	7	52	4	0.077	0.571	GO:0005992	BP	24	trehalose biosynthetic process	4	YMR105C,YBR126C,YDR074W,YML100W
1	!	0.000511	395	80	19	0.237	0.048	GO:0019752	BP	24	carboxylic acid metabolic process	1	YAL054C,YMR303C,YER178W,YGR256W,YAL044C,YGR019W,YOR374W,YNL071W,YMR169C,YDL182W,YBR026C,YMR189W,YMR083W,YKL192C,YDR019C,YAL038W,YNR001C,YGL009C,YCL064C
1	!	0.00859	119	72	9	0.125	0.076	GO:0032787	BP	24	monocarboxylic acid metabolic process	2	YAL054C,YER178W,YGR256W,YGR019W,YOR374W,YNL071W,YBR026C,YKL192C,YAL038W
1	!	0.0105	13	72	4	0.056	0.308	GO:0006090	BP	24	pyruvate metabolic process	3	YER178W,YOR374W,YNL071W,YAL038W
1	!	0.0104	60	80	7	0.087	0.117	GO:0009063	BP	29	cellular amino acid catabolic process	1	YMR303C,YAL044C,YGR019W,YMR189W,YMR083W,YDR019C,YCL064C
1	!	0.00036	6	80	4	0.05	0.667	GO:0009071	BP	6	serine family amino acid catabolic process	1	YAL044C,YMR189W,YDR019C,YCL064C
1	!	0.00506	4	70	3	0.043	0.75	GO:0006546	BP	6	glycine catabolic process	1	YAL044C,YMR189W,YDR019C
1	!	0.00328	6	36	3	0.083	0.5	GO:0035384	BP	4	thioester biosynthetic process	1	YAL054C,YER178W,YNL071W
1	!	0.00328	6	36	3	0.083	0.5	GO:0071616	BP	4	acyl-CoA biosynthetic process	1	YAL054C,YER178W,YNL071W
1	!	0.0123	13	75	4	0.053	0.308	GO:0006084	BP	4	acetyl-CoA metabolic process	1	YAL054C,YER178W,YNL071W,YNR001C
1	!	0.00328	6	36	3	0.083	0.5	GO:0006085	BP	4	acetyl-CoA biosynthetic process	2	YAL054C,YER178W,YNL071W
1	!	0.0264	5261	96	95	0.99	0.018	GO:0005623	CC	17	cell	1	YBL075C,YPL223C,YBR117C,YAL054C,YER103W,YDL022W,YGR260W,YBL001C,YMR174C,YER028C,YFL014W,YMR303C,YPR149W,YNL134C,YGR254W,YDR001C,YNL126W,YER178W,YHR087W,YAL061W,YLR109W,YBR118W,YPR127W,YGR256W,YAL044C,YOR173W,YGR038W,YGR019W,YGR248W,YMR173W,YBR169C,YDR258C,YOR374W,YPL240C,YDL091C,YNL071W,YMR105C,YIR037W,YGR043C,YGR008C,YNL052W,YML070W,YBR126C,YMR169C,YDL182W,YBL064C,YDR074W,YBR026C,YDR032C,YDL028C…
1	!	0.0264	5261	96	95	0.99	0.018	GO:0044464	CC	17	cell part	2	YBL075C,YPL223C,YBR117C,YAL054C,YER103W,YDL022W,YGR260W,YBL001C,YMR174C,YER028C,YFL014W,YMR303C,YPR149W,YNL134C,YGR254W,YDR001C,YNL126W,YER178W,YHR087W,YAL061W,YLR109W,YBR118W,YPR127W,YGR256W,YAL044C,YOR173W,YGR038W,YGR019W,YGR248W,YMR173W,YBR169C,YDR258C,YOR374W,YPL240C,YDL091C,YNL071W,YMR105C,YIR037W,YGR043C,YGR008C,YNL052W,YML070W,YBR126C,YMR169C,YDL182W,YBL064C,YDR074W,YBR026C,YDR032C,YDL028C…
1	!	0.0202	5004	96	93	0.969	0.019	GO:0005622	CC	17	intracellular	3	YBL075C,YPL223C,YBR117C,YAL054C,YER103W,YDL022W,YGR260W,YBL001C,YMR174C,YER028C,YFL014W,YMR303C,YPR149W,YNL134C,YGR254W,YDR001C,YNL126W,YER178W,YHR087W,YAL061W,YLR109W,YBR118W,YPR127W,YGR256W,YAL044C,YOR173W,YGR038W,YGR019W,YGR248W,YMR173W,YBR169C,YDR258C,YOR374W,YPL240C,YDL091C,YNL071W,YMR105C,YIR037W,YGR043C,YGR008C,YNL052W,YML070W,YBR126C,YMR169C,YDL182W,YBL064C,YDR074W,YBR026C,YDR032C,YDL028C…
1	!	0.0159	4989	96	93	0.969	0.019	GO:0044424	CC	17	intracellular part	4	YBL075C,YPL223C,YBR117C,YAL054C,YER103W,YDL022W,YGR260W,YBL001C,YMR174C,YER028C,YFL014W,YMR303C,YPR149W,YNL134C,YGR254W,YDR001C,YNL126W,YER178W,YHR087W,YAL061W,YLR109W,YBR118W,YPR127W,YGR256W,YAL044C,YOR173W,YGR038W,YGR019W,YGR248W,YMR173W,YBR169C,YDR258C,YOR374W,YPL240C,YDL091C,YNL071W,YMR105C,YIR037W,YGR043C,YGR008C,YNL052W,YML070W,YBR126C,YMR169C,YDL182W,YBL064C,YDR074W,YBR026C,YDR032C,YDL028C…
1	!	2.62e-05	4013	96	87	0.906	0.022	GO:0005737	CC	17	cytoplasm	5	YBL075C,YPL223C,YBR117C,YAL054C,YER103W,YDL022W,YGR260W,YBL001C,YMR174C,YER028C,YFL014W,YMR303C,YPR149W,YNL134C,YGR254W,YDR001C,YNL126W,YER178W,YHR087W,YAL061W,YLR109W,YBR118W,YPR127W,YGR256W,YAL044C,YOR173W,YGR038W,YGR019W,YGR248W,YMR173W,YBR169C,YDR258C,YOR374W,YPL240C,YDL091C,YNL071W,YMR105C,YIR037W,YGR043C,YGR008C,YNL052W,YML070W,YBR126C,YMR169C,YDL182W,YBL064C,YDR074W,YBR026C,YDR032C,YML100W…
1	!	0.00205	4	52	3	0.058	0.75	GO:0005946	CC	8	alpha,alpha-trehalose-phosphate synthase complex (UDP-forming)	1	YBR126C,YDR074W,YML100W
1	!	0.00506	4	70	3	0.043	0.75	GO:0005960	CC	5	glycine cleavage complex	1	YAL044C,YMR189W,YDR019C
1	!	0.0307	9	47	3	0.064	0.333	GO:0051920	MF	20	peroxiredoxin activity	1	YLR109W,YIR037W,YBL064C
1	!	0.000141	2168	95	59	0.621	0.027	GO:0003824	MF	23	catalytic activity	1	YBL075C,YBR117C,YAL054C,YER103W,YDL022W,YMR303C,YNL134C,YGR254W,YDR001C,YER178W,YAL061W,YLR109W,YBR118W,YPR127W,YGR256W,YOR173W,YGR019W,YGR248W,YMR173W,YDR258C,YOR374W,YPL240C,YNL071W,YMR105C,YIR037W,YGR043C,YNL052W,YML070W,YDR533C,YBR126C,YMR169C,YDL182W,YBL064C,YDR074W,YBR026C,YDR032C,YDL028C,YML100W,YOR215C,YDR155C,YMR189W,YMR083W,YDL124W,YDL137W,YEL011W,YDR019C,YAL038W,YER062C,YNR001C,YGL009C…
1	!	2.46e-05	327	88	20	0.227	0.061	GO:0016491	MF	23	oxidoreductase activity	2	YDL022W,YMR303C,YNL134C,YER178W,YAL061W,YLR109W,YPR127W,YGR256W,YOR374W,YIR037W,YNL052W,YMR169C,YBL064C,YBR026C,YDR032C,YMR189W,YMR083W,YDL124W,YOL151W,YHR104W
1	!	0.000443	89	88	10	0.114	0.112	GO:0016614	MF	23	oxidoreductase activity, acting on CH-OH group of donors	3	YDL022W,YMR303C,YNL134C,YAL061W,YPR127W,YGR256W,YMR083W,YDL124W,YOL151W,YHR104W
1	!	0.000319	86	88	10	0.114	0.116	GO:0016616	MF	23	oxidoreductase activity, acting on the CH-OH group of donors, NAD or NADP as acceptor	4	YDL022W,YMR303C,YNL134C,YAL061W,YPR127W,YGR256W,YMR083W,YDL124W,YOL151W,YHR104W
1	!	0.00708	10	88	4	0.045	0.4	GO:0004033	MF	23	aldo-keto reductase (NADP) activity	5	YNL134C,YPR127W,YDL124W,YHR104W
1	!	5.58e-07	987	81	38	0.469	0.039	BIOGRID:00000	bi	25	BioGRID interaction data	1	YBL075C,YPL223C,YBR117C,YAL054C,YER103W,YDL022W,YGR260W,YBL001C,YMR174C,YER028C,YFL014W,YMR303C,YPR149W,YNL134C,YGR254W,YDR001C,YNL126W,YER178W,YHR087W,YAL061W,YLR109W,YBR118W,YPR127W,YGR256W,YAL044C,YOR173W,YGR038W,YGR019W,YGR248W,YMR173W,YBR169C,YDR258C,YOR374W,YPL240C,YDL091C,YNL071W,YMR105C,YIR037W
1	!	0.00561	3	70	3	0.043	1	HP:0100247	hp	18	Recurrent singultus	1	YAL044C,YMR189W,YDR019C
1	!	0.00354	14	70	5	0.071	0.357	HP:0003112	hp	3	Abnormality of serum amino acid levels	1	YER178W,YAL044C,YNL071W,YMR189W,YDR019C
1	!	0.0221	4	70	3	0.043	0.75	HP:0002154	hp	3	Hyperglycinemia	1	YAL044C,YMR189W,YDR019C
1	!	0.00561	3	70	3	0.043	1	HP:0008288	hp	3	Nonketotic hyperglycinemia	2	YAL044C,YMR189W,YDR019C
1	!	0.00129	39	95	7	0.074	0.179	KEGG:00500	ke	33	Starch and sucrose metabolism	1	YDR001C,YMR105C,YBR126C,YDR074W,YML100W,YEL011W,YMR278W
1	!	4.16e-06	667	95	36	0.379	0.054	KEGG:01100	ke	32	Metabolic pathways	1	YBR117C,YAL054C,YMR303C,YGR254W,YDR001C,YER178W,YPR127W,YGR256W,YGR019W,YGR248W,YOR374W,YNL071W,YMR105C,YGR043C,YNL052W,YML070W,YBR126C,YMR169C,YDL182W,YDR074W,YBR026C,YML100W,YMR189W,YMR083W,YKL192C,YEL011W,YDR019C,YAL038W,YER062C,YNR001C,YGL009C,YCL064C,YBR039W,YHR104W,YDR121W,YMR278W
1	!	0.00163	28	95	6	0.063	0.214	KEGG:00030	ke	7	Pentose phosphate pathway	1	YBR117C,YGR256W,YGR248W,YMR105C,YGR043C,YMR278W
1	!	0.00451	12	33	3	0.091	0.25	KEGG:00640	ke	28	Propanoate metabolism	1	YAL054C,YGR019W,YOR374W
1	!	0.000609	267	95	19	0.2	0.071	KEGG:01110	ke	14	Biosynthesis of secondary metabolites	1	YBR117C,YAL054C,YMR303C,YGR254W,YER178W,YGR256W,YAL044C,YGR248W,YOR374W,YNL071W,YMR105C,YGR043C,YMR083W,YEL011W,YAL038W,YNR001C,YGL009C,YCL064C,YMR278W
1	!	0.00946	18	28	3	0.107	0.167	KEGG:00650	ke	10	Butanoate metabolism	1	YER178W,YAL061W,YGR019W
1	!	1.22e-06	104	80	14	0.175	0.135	KEGG:01200	ke	31	Carbon metabolism	1	YBR117C,YAL054C,YGR254W,YER178W,YGR256W,YGR248W,YNL071W,YGR043C,YML070W,YMR189W,YDR019C,YAL038W,YNR001C,YCL064C
1	!	0.0408	21	88	4	0.045	0.19	KEGG:00561	ke	22	Glycerolipid metabolism	1	YOR374W,YML070W,YER062C,YHR104W
1	!	0.000307	33	88	7	0.08	0.212	KEGG:00620	ke	13	Pyruvate metabolism	1	YAL054C,YER178W,YOR374W,YNL071W,YDL182W,YAL038W,YHR104W
1	!	2.1e-06	55	95	11	0.116	0.2	KEGG:00010	ke	9	Glycolysis / Gluconeogenesis	1	YAL054C,YMR303C,YGR254W,YER178W,YOR374W,YNL071W,YMR105C,YMR169C,YMR083W,YAL038W,YMR278W
1	!	0.0147	12	45	3	0.067	0.25	KEGG:00410	ke	19	beta-Alanine metabolism	1	YGR019W,YOR374W,YMR169C
1	!	2.86e-05	67	72	11	0.153	0.164	REAC:504349	re	21	Metabolism of carbohydrates	1	YBR117C,YGR254W,YDR001C,YER178W,YGR256W,YGR248W,YNL071W,YMR105C,YGR043C,YEL011W,YAL038W
1	!	0.00495	13	39	4	0.103	0.308	REAC:504417	re	21	Pentose phosphate pathway (hexose monophosphate shunt)	2	YBR117C,YGR256W,YGR248W,YGR043C
1	!	0.0328	7	5	2	0.4	0.286	REAC:503873	re	27	Release of 78 kDa glucose-regulated protein	1	YBL075C,YER103W
1	!	0.0206	7	45	3	0.067	0.429	REAC:504424	re	15	Ethanol catabolism	1	YAL054C,YOR374W,YMR169C
1	!	0.000936	264	85	13	0.153	0.049	TF:M00169_3	tf	2	Factor: HSF; motif: AGAANNTTCTAGAAN; match class: 3	1	YER103W,YBR118W,YGR256W,YBR169C,YDR258C,YOR374W,YDL028C,YML100W,YMR251W-A,YEL011W,YDR171W,YNL007C,YBR245C
1	!	0.0404	2070	94	44	0.468	0.021	TF:M00713_3	tf	11	Factor: TBP; motif: YNTTTATAT; match class: 3	1	YBR117C,YER103W,YGR260W,YMR174C,YMR303C,YGR254W,YDR001C,YNL126W,YAL061W,YLR109W,YGR038W,YBR169C,YOR374W,YPL240C,YMR105C,YGR043C,YDR533C,YMR169C,YDL182W,YBL064C,YDR032C,YDL028C,YML100W,YLR178C,YOR215C,YDR155C,YMR189W,YMR251W-A,YIL135C,YGR065C,YKL192C,YBL014C,YGL097W,YNL194C,YIL121W,YNR001C,YGL009C,YPL004C,YCL064C,YNL007C,YHR104W,YKL222C,YBL111C,YDR121W
1	!	3.67e-05	92	79	9	0.114	0.098	TF:M00308_0	tf	12	Factor: STRE; motif: MAGGGGN; match class: 0	1	YDL022W,YFL014W,YMR105C,YGR008C,YBR126C,YMR169C,YDL124W,YNL194C,YDR171W
#INFO:	PARAMETERS: sort_by_structure = 1
#INFO:	PARAMETERS: user_thr = 1.00
#INFO:	PARAMETERS: significant = 1
#INFO:	PARAMETERS: ordered_queries = 1
#INFO:	PARAMETERS: organism = scerevisiae
#INFO:	PARAMETERS: analytical = 1
#INFO:	User: g:Profiler web interface
#INFO:	Host: ronk1.at.mt.ut.ee
#INFO:	Time: 2013-11-6 19:55:57
#INFO:	Effective domain size for REAC: 868
#INFO:	Effective domain size for GO: 6023
#INFO:	Effective domain size for TF: 5667
#INFO:	Effective domain size for KEGG: 1849
#INFO:	Effective domain size for BIOGRID: 5698
#INFO:	Effective domain size for HP: 717

## Sheet: RMxBY GFP higher than BYxBY
#		p-value		T	Q	Q&T	Q&T/Q	Q&T/T	term ID		t type	t group	t name and depth in group
#
1	!	4.25e-06	132	62	12	0.194	0.091	GO:1901615	BP	2	organic hydroxy compound metabolic process	1	YML126C,YMR015C,YNR019W,YGR060W,YLL012W,YLR100W,YPL170W,YJR073C,YER044C,YHR072W,YPL028W,YJL153C
1	!	0.0011	320	94	18	0.191	0.056	GO:0044711	BP	2	single-organism biosynthetic process	1	YML126C,YER081W,YMR015C,YDR502C,YGR060W,YLR100W,YPL170W,YGL055W,YJR073C,YER044C,YHR072W,YOL055C,YPL028W,YJL153C,YGR155W,YDR127W,YEL046C,YMR009W
1	!	0.001	318	94	18	0.191	0.057	GO:0044283	BP	2	small molecule biosynthetic process	1	YML126C,YER081W,YMR015C,YDR502C,YGR060W,YLR100W,YPL170W,YGL055W,YJR073C,YER044C,YHR072W,YOL055C,YPL028W,YJL153C,YGR155W,YDR127W,YEL046C,YMR009W
1	!	3.63e-06	79	62	10	0.161	0.127	GO:1901617	BP	2	organic hydroxy compound biosynthetic process	1	YML126C,YMR015C,YGR060W,YLR100W,YPL170W,YJR073C,YER044C,YHR072W,YPL028W,YJL153C
1	!	0.0013	308	62	14	0.226	0.045	GO:0006629	BP	2	lipid metabolic process	1	YML126C,YMR015C,YNR019W,YGR060W,YLL012W,YLR100W,YPL170W,YGL055W,YJR073C,YKL008C,YER044C,YHR072W,YPL028W,YJL153C
1	!	1.06e-08	49	57	10	0.175	0.204	GO:0008202	BP	2	steroid metabolic process	2	YML126C,YMR015C,YNR019W,YGR060W,YLL012W,YLR100W,YPL170W,YER044C,YHR072W,YPL028W
1	!	0.000226	188	62	12	0.194	0.064	GO:0008610	BP	2	lipid biosynthetic process	2	YML126C,YMR015C,YGR060W,YLR100W,YPL170W,YGL055W,YJR073C,YKL008C,YER044C,YHR072W,YPL028W,YJL153C
1	!	1.08e-06	38	57	8	0.14	0.211	GO:0006694	BP	2	steroid biosynthetic process	3	YML126C,YMR015C,YGR060W,YLR100W,YPL170W,YER044C,YHR072W,YPL028W
1	!	2.26e-06	125	62	12	0.194	0.096	GO:0006066	BP	2	alcohol metabolic process	1	YML126C,YMR015C,YNR019W,YGR060W,YLL012W,YLR100W,YPL170W,YJR073C,YER044C,YHR072W,YPL028W,YJL153C
1	!	2.68e-09	30	57	9	0.158	0.3	GO:0016128	BP	2	phytosteroid metabolic process	2	YML126C,YMR015C,YNR019W,YGR060W,YLR100W,YPL170W,YER044C,YHR072W,YPL028W
1	!	7.07e-09	33	57	9	0.158	0.273	GO:0044107	BP	2	cellular alcohol metabolic process	2	YML126C,YMR015C,YNR019W,YGR060W,YLR100W,YPL170W,YER044C,YHR072W,YPL028W
1	!	3.63e-06	79	62	10	0.161	0.127	GO:0046165	BP	2	alcohol biosynthetic process	2	YML126C,YMR015C,YGR060W,YLR100W,YPL170W,YJR073C,YER044C,YHR072W,YPL028W,YJL153C
1	!	7.34e-08	28	57	8	0.14	0.286	GO:0016129	BP	2	phytosteroid biosynthetic process	3	YML126C,YMR015C,YGR060W,YLR100W,YPL170W,YER044C,YHR072W,YPL028W
1	!	7.34e-08	28	57	8	0.14	0.286	GO:0044108	BP	2	cellular alcohol biosynthetic process	3	YML126C,YMR015C,YGR060W,YLR100W,YPL170W,YER044C,YHR072W,YPL028W
1	!	1.06e-08	49	57	10	0.175	0.204	GO:0016125	BP	2	sterol metabolic process	2	YML126C,YMR015C,YNR019W,YGR060W,YLL012W,YLR100W,YPL170W,YER044C,YHR072W,YPL028W
1	!	2.68e-09	30	57	9	0.158	0.3	GO:0008204	BP	2	ergosterol metabolic process	3	YML126C,YMR015C,YNR019W,YGR060W,YLR100W,YPL170W,YER044C,YHR072W,YPL028W
1	!	1.08e-06	38	57	8	0.14	0.211	GO:0016126	BP	2	sterol biosynthetic process	3	YML126C,YMR015C,YGR060W,YLR100W,YPL170W,YER044C,YHR072W,YPL028W
1	!	7.34e-08	28	57	8	0.14	0.286	GO:0006696	BP	2	ergosterol biosynthetic process	4	YML126C,YMR015C,YGR060W,YLR100W,YPL170W,YER044C,YHR072W,YPL028W
1	!	0.0219	1636	100	46	0.46	0.028	GO:0044425	CC	12	membrane part	1	YER053C-A,YJR048W,YMR022W,YOR065W,YNR044W,YOR273C,YGR189C,YNR019W,YGR060W,YOR153W,YLL012W,YFL026W,YLR100W,YLL028W,YMR122W-A,YPR029C,YGL055W,YMR011W,YGL187C,YJR073C,YDR011W,YKL008C,YDR128W,YER044C,YLL052C,YCL056C,YJR086W,YHR072W,YML116W,YBR291C,YOL019W,YML038C,YBR287W,YJL078C,YIL158W,YHR051W,YMR183C,YPL053C,YLL013C,YOR087W,YLR237W,YDR481C,YOR165W,YHR142W,YHR001W-A,YKL096W
1	!	0.00215	94	100	10	0.1	0.106	GO:0005576	CC	13	extracellular region	1	YGR282C,YNR044W,YGR189C,YGR279C,YIL015W,YLR300W,YJL078C,YJL158C,YDR461W,YKL096W
1	!	2.09e-06	24	35	6	0.171	0.25	GO:0046906	MF	7	tetrapyrrole binding	1	YGR234W,YJR048W,YMR015C,YOR065W,YPL170W,YGL055W
1	!	2.09e-06	24	35	6	0.171	0.25	GO:0020037	MF	7	heme binding	2	YGR234W,YJR048W,YMR015C,YOR065W,YPL170W,YGL055W
1	!	0.0149	29	35	4	0.114	0.138	GO:0016705	MF	4	oxidoreductase activity, acting on paired donors, with incorporation or reduction of molecular oxygen	1	YGR234W,YMR015C,YGR060W,YGL055W
1	!	3.42e-05	37	35	6	0.171	0.162	GO:0005506	MF	10	iron ion binding	1	YGR234W,YJR048W,YMR015C,YOR065W,YGR060W,YGL055W
1	!	6.79e-09	2338	100	74	0.74	0.032	BIOGRID:00000	bi	11	BioGRID interaction data	1	YGR234W,YJR048W,YKR046C,YML126C,YLR153C,YER081W,YNL112W,YGR282C,YMR015C,YMR022W,YOR065W,YDR170W-A,YNR044W,YDL053C,YOR273C,YGR189C,YDR502C,YNR019W,YGR279C,YPL198W,YGR060W,YOR153W,YLL012W,YHR121W,YFL026W,YLR100W,YLL028W,YDR150W,YMR122W-A,YPL170W,YKL105C,YJL191W,YPR029C,YGL055W,YBR233W-A,YMR011W,YGL187C,YJR073C,YDR011W,YKL008C,YDR128W,YER044C,YIR015W,YLL052C,YGL076C,YCL037C,YJL048C,YCL056C,YJR086W,Y…
1	!	0.00538	2	57	2	0.035	1	KEGG:00072	ke	6	Synthesis and degradation of ketone bodies	1	YML126C,YPL028W
1	!	1.53e-05	14	51	5	0.098	0.357	KEGG:00100	ke	9	Steroid biosynthesis	1	YMR015C,YNR019W,YGR060W,YLR100W,YHR072W
1	!	0.0149	28	7	2	0.286	0.071	KEGG:00680	ke	14	Methane metabolism	1	YLR153C,YER081W
1	!	0.0406	6	40	2	0.05	0.333	KEGG:02010	ke	8	ABC transporters	1	YOR153W,YDR011W
1	!	9.2e-05	62	57	8	0.14	0.129	REAC:504337	re	1	Metabolism of lipids and lipoproteins	1	YML126C,YNR019W,YGR060W,YOR153W,YLR100W,YDR011W,YHR072W,YPL028W
1	!	0.0239	2	57	2	0.035	1	REAC:504361	re	1	Ketone body metabolism	2	YML126C,YPL028W
1	!	0.0239	2	57	2	0.035	1	REAC:504360	re	1	Synthesis of Ketone Bodies	3	YML126C,YPL028W
1	!	0.0239	2	57	2	0.035	1	REAC:504359	re	1	Formation of Acetoacetic Acid	4	YML126C,YPL028W
1	!	0.0374	26	51	4	0.078	0.154	REAC:504336	re	1	Steroid metabolism	2	YML126C,YGR060W,YLR100W,YHR072W
1	!	0.00496	16	51	4	0.078	0.25	REAC:504407	re	1	Cholesterol biosynthesis	3	YML126C,YGR060W,YLR100W,YHR072W
1	!	0.00418	66	47	5	0.106	0.076	TF:M00305_4	tf	3	Factor: HAP1; motif: MCGGARWTAWCGGM; match class: 4	1	YML126C,YOR065W,YKL105C,YGL055W,YCL037C
1	!	0.0132	47	47	4	0.085	0.085	TF:M00305_3	tf	3	Factor: HAP1; motif: MCGGARWTAWCGGM; match class: 3	2	YOR065W,YKL105C,YGL055W,YCL037C
1	!	0.0309	111	89	7	0.079	0.063	TF:M00167_0	tf	5	Factor: HSF; motif: AGAANAGAANAGAAN; match class: 0	1	YNR044W,YIR015W,YCL037C,YNL062C,YLR237W,YML058W-A,YER074W
#INFO:	PARAMETERS: sort_by_structure = 1
#INFO:	PARAMETERS: user_thr = 1.00
#INFO:	PARAMETERS: significant = 1
#INFO:	PARAMETERS: ordered_queries = 1
#INFO:	PARAMETERS: organism = scerevisiae
#INFO:	PARAMETERS: analytical = 1
#INFO:	User: g:Profiler web interface
#INFO:	Host: ronk1.at.mt.ut.ee
#INFO:	Time: 2013-11-6 19:56:8
#WARNING:	Gene YHR055C in query [1/58] is not recognized, skipping!
#INFO:	Effective domain size for REAC: 868
#INFO:	Effective domain size for GO: 6023
#INFO:	Effective domain size for TF: 5667
#INFO:	Effective domain size for KEGG: 1849
#INFO:	Effective domain size for BIOGRID: 5698
#INFO:	Effective domain size for HP: 717

## Sheet: RMxBY mRNA lower than BYxBY 
No significant hits at p < 0.001

## Sheet: RMxBY mRNA higher than BYxBY
#		p-value	T	Q	Q&T	Q&T/Q	Q&T/T	term ID	t type	t group	t name and depth in group
#
1	!	0.0138	129	87	9	0.103	0.07	GO:0042274	BP	3	ribosomal small subunit biogenesis	1	YFR001W,YDR339C,YKL156W,YJL136C,YLR051C,YNL302C,YBR181C,YMR269W,YLR068W
1	!	0.000166	477	100	22	0.22	0.046	GO:0006412	BP	9	translation	1	YNL122C,YGR076C,YMR188C,YBL090W,YOR167C,YKL156W,YHR052W,YGR222W,YJL136C,YEL034W,YDL133C-A,YBL038W,YFR032C-A,YNL302C,YNL178W,YJL096W,YBR181C,YBR251W,YDL061C,YJR094W-A,YNL137C,YKL056C
1	!	0.0121	169	100	11	0.11	0.065	GO:0002181	BP	9	cytoplasmic translation	2	YOR167C,YKL156W,YJL136C,YDL133C-A,YFR032C-A,YNL302C,YNL178W,YBR181C,YDL061C,YJR094W-A,YKL056C
1	!	3.06e-07	324	94	21	0.223	0.065	GO:0007005	BP	12	mitochondrion organization	1	YPR020W,YGR076C,YMR188C,YBL090W,YOL077W-A,YMR098C,YNL070W,YFR011C,YBL059C-A,YIL138C,YGR222W,YDR077W,YIL098C,YBL038W,YJL096W,YKR016W,YJR135W-A,YBR251W,YLL009C,YBR091C,YNL137C
1	!	0.0115	45	89	6	0.067	0.133	GO:0007006	BP	12	mitochondrial membrane organization	2	YPR020W,YNL070W,YFR011C,YKR016W,YJR135W-A,YBR091C
1	!	0.00795	25	89	5	0.056	0.2	GO:0007007	BP	12	inner mitochondrial membrane organization	3	YPR020W,YFR011C,YKR016W,YJR135W-A,YBR091C
1	!	0.0383	10	59	3	0.051	0.3	GO:0043461	BP	12	proton-transporting ATP synthase complex assembly	1	YOL077W-A,YMR098C,YIL098C
1	!	0.0383	10	59	3	0.051	0.3	GO:0033615	BP	12	mitochondrial proton-transporting ATP synthase complex assembly	2	YOL077W-A,YMR098C,YIL098C
1	!	0.0201	2168	97	47	0.485	0.022	GO:0071840	BP	5	cellular component organization or biogenesis	1	YPR020W,YGR076C,YMR188C,YGR183C,YFR001W,YEL003W,YOL109W,YBL090W,YOL077W-A,YMR098C,YNL070W,YFR011C,YOR167C,YBL059C-A,YDR339C,YKL156W,YIL138C,YHR052W,YGR282C,YOR295W,YHR138C,YGR222W,YJL136C,YEL034W,YDR077W,YIL098C,YBL038W,YLR051C,YPR128C,YBR087W,YNL302C,YNL178W,YJL096W,YBR181C,YKR016W,YJR135W-A,YKR071C,YMR077C,YMR269W,YBR251W,YDR168W,YLR068W,YLL009C,YBR091C,YBR167C,YNL137C,YLR414C
1	!	0.0282	1184	100	32	0.32	0.027	GO:0043228	CC	2	non-membrane-bounded organelle	1	YNL122C,YGR076C,YMR188C,YFR001W,YBL090W,YOR167C,YDR339C,YKL156W,YIL138C,YIL096C,YHR052W,YOR295W,YJL136C,YEL034W,YDL133C-A,YDR077W,YBL038W,YLR051C,YBR087W,YFR032C-A,YNL302C,YNL178W,YJL096W,YBR181C,YMR269W,YBR251W,YLR068W,YDL061C,YJR094W-A,YBR167C,YNL137C,YKL056C
1	!	0.0282	1184	100	32	0.32	0.027	GO:0043232	CC	2	intracellular non-membrane-bounded organelle	2	YNL122C,YGR076C,YMR188C,YFR001W,YBL090W,YOR167C,YDR339C,YKL156W,YIL138C,YIL096C,YHR052W,YOR295W,YJL136C,YEL034W,YDL133C-A,YDR077W,YBL038W,YLR051C,YBR087W,YFR032C-A,YNL302C,YNL178W,YJL096W,YBR181C,YMR269W,YBR251W,YLR068W,YDL061C,YJR094W-A,YBR167C,YNL137C,YKL056C
1	!	0.000866	2750	100	59	0.59	0.021	GO:0044444	CC	2	cytoplasmic part	1	YPR020W,YMR256C,YNL122C,YNL111C,YGR076C,YMR188C,YGR183C,YLR050C,YEL003W,YOR103C,YDR513W,YOL109W,YBR244W,YBL090W,YOL077W-A,YMR098C,YNL070W,YHR007C,YFR011C,YOR167C,YBL059C-A,YHR039C,YML075C,YKL156W,YIL138C,YKL063C,YHR052W,YGR222W,YJL136C,YEL034W,YLR170C,YDL133C-A,YDR077W,YMR015C,YIL098C,YBL038W,YPR128C,YFR032C-A,YOR320C,YNL302C,YNL178W,YJL096W,YBR181C,YKR016W,YJR135W-A,YKR071C,YMR077C,YBR251W,YOR06…
1	!	0.0222	232	92	12	0.13	0.052	GO:0044445	CC	2	cytosolic part	2	YEL003W,YOR167C,YKL156W,YJL136C,YEL034W,YDL133C-A,YFR032C-A,YNL302C,YNL178W,YBR181C,YDL061C,YJR094W-A
1	!	0.0204	1109	100	31	0.31	0.028	GO:0005739	CC	2	mitochondrion	2	YPR020W,YMR256C,YNL122C,YGR076C,YMR188C,YGR183C,YDR513W,YOL109W,YBR244W,YBL090W,YOL077W-A,YMR098C,YNL070W,YFR011C,YBL059C-A,YGR222W,YEL034W,YDR077W,YIL098C,YBL038W,YJL096W,YKR016W,YJR135W-A,YKR071C,YBR251W,YOR065W,YLL009C,YBR091C,YNL137C,YMR267W,YKL056C
1	!	0.029	2852	100	57	0.57	0.02	GO:0044422	CC	2	organelle part	1	YPR020W,YMR256C,YNL111C,YGR076C,YMR188C,YGR183C,YLR050C,YFR001W,YOR103C,YOL109W,YBR244W,YBL090W,YOL077W-A,YMR098C,YNL070W,YFR011C,YOR167C,YBL059C-A,YDR339C,YML075C,YKL156W,YIL138C,YIL096C,YHR052W,YOR295W,YGR222W,YJL136C,YLR170C,YDL133C-A,YIL098C,YBL038W,YLR051C,YPR128C,YBR087W,YFR032C-A,YOR320C,YNL302C,YNL178W,YJL096W,YBR181C,YKR016W,YJR135W-A,YKR071C,YMR077C,YMR269W,YBR251W,YOR065W,YLR068W,YLL00…
1	!	0.028	2849	100	57	0.57	0.02	GO:0044446	CC	2	intracellular organelle part	2	YPR020W,YMR256C,YNL111C,YGR076C,YMR188C,YGR183C,YLR050C,YFR001W,YOR103C,YOL109W,YBR244W,YBL090W,YOL077W-A,YMR098C,YNL070W,YFR011C,YOR167C,YBL059C-A,YDR339C,YML075C,YKL156W,YIL138C,YIL096C,YHR052W,YOR295W,YGR222W,YJL136C,YLR170C,YDL133C-A,YIL098C,YBL038W,YLR051C,YPR128C,YBR087W,YFR032C-A,YOR320C,YNL302C,YNL178W,YJL096W,YBR181C,YKR016W,YJR135W-A,YKR071C,YMR077C,YMR269W,YBR251W,YOR065W,YLR068W,YLL00…
1	!	3.21e-05	589	94	25	0.266	0.042	GO:0044429	CC	2	mitochondrial part	3	YPR020W,YMR256C,YGR076C,YMR188C,YGR183C,YOL109W,YBR244W,YBL090W,YOL077W-A,YMR098C,YNL070W,YFR011C,YBL059C-A,YGR222W,YIL098C,YBL038W,YJL096W,YKR016W,YJR135W-A,YKR071C,YBR251W,YOR065W,YLL009C,YBR091C,YNL137C
1	!	0.0045	244	89	13	0.146	0.053	GO:0019866	CC	2	organelle inner membrane	1	YPR020W,YMR256C,YGR183C,YBR244W,YOL077W-A,YMR098C,YFR011C,YBL059C-A,YGR222W,YKR016W,YJR135W-A,YOR065W,YBR091C
1	!	0.00095	652	94	24	0.255	0.037	GO:0030529	CC	2	ribonucleoprotein complex	1	YNL122C,YGR076C,YMR188C,YFR001W,YBL090W,YOR167C,YDR339C,YKL156W,YHR052W,YJL136C,YEL034W,YDL133C-A,YDR077W,YBL038W,YFR032C-A,YNL302C,YNL178W,YJL096W,YBR181C,YBR251W,YDL061C,YJR094W-A,YBR167C,YNL137C
1	!	1.04e-08	271	94	21	0.223	0.077	GO:0005840	CC	2	ribosome	2	YNL122C,YGR076C,YMR188C,YBL090W,YOR167C,YKL156W,YHR052W,YJL136C,YEL034W,YDL133C-A,YDR077W,YBL038W,YFR032C-A,YNL302C,YNL178W,YJL096W,YBR181C,YBR251W,YDL061C,YJR094W-A,YNL137C
1	!	4.18e-07	233	94	18	0.191	0.077	GO:0044391	CC	2	ribosomal subunit	3	YGR076C,YMR188C,YBL090W,YOR167C,YKL156W,YHR052W,YJL136C,YDL133C-A,YBL038W,YFR032C-A,YNL302C,YNL178W,YJL096W,YBR181C,YBR251W,YDL061C,YJR094W-A,YNL137C
1	!	3.35e-05	99	94	11	0.117	0.111	GO:0015935	CC	2	small ribosomal subunit	4	YMR188C,YBL090W,YOR167C,YKL156W,YJL136C,YNL302C,YNL178W,YBR181C,YBR251W,YDL061C,YNL137C
1	!	0.00404	163	92	11	0.12	0.067	GO:0022626	CC	2	cytosolic ribosome	3	YOR167C,YKL156W,YJL136C,YEL034W,YDL133C-A,YFR032C-A,YNL302C,YNL178W,YBR181C,YDL061C,YJR094W-A
1	!	0.00893	64	90	7	0.078	0.109	GO:0022627	CC	2	cytosolic small ribosomal subunit	4	YOR167C,YKL156W,YJL136C,YNL302C,YNL178W,YBR181C,YDL061C
1	!	0.00393	408	89	17	0.191	0.042	GO:0005740	CC	2	mitochondrial envelope	1	YPR020W,YMR256C,YGR183C,YOL109W,YBR244W,YOL077W-A,YMR098C,YNL070W,YFR011C,YBL059C-A,YGR222W,YKR016W,YJR135W-A,YKR071C,YOR065W,YLL009C,YBR091C
1	!	0.0219	370	89	15	0.169	0.041	GO:0031966	CC	2	mitochondrial membrane	1	YPR020W,YMR256C,YGR183C,YOL109W,YBR244W,YOL077W-A,YMR098C,YNL070W,YFR011C,YBL059C-A,YGR222W,YKR016W,YJR135W-A,YOR065W,YBR091C
1	!	0.00198	158	89	11	0.124	0.07	GO:0044455	CC	2	mitochondrial membrane part	2	YPR020W,YMR256C,YGR183C,YBR244W,YOL077W-A,YNL070W,YFR011C,YGR222W,YKR016W,YOR065W,YBR091C
1	!	0.00257	232	89	13	0.146	0.056	GO:0005743	CC	2	mitochondrial inner membrane	2	YPR020W,YMR256C,YGR183C,YBR244W,YOL077W-A,YMR098C,YFR011C,YBL059C-A,YGR222W,YKR016W,YJR135W-A,YOR065W,YBR091C
1	!	0.00433	41	84	6	0.071	0.146	GO:0009055	MF	16	electron carrier activity	1	YNL111C,YDR513W,YHR007C,YMR015C,YKR071C,YOR065W
1	!	1e-06	371	97	22	0.227	0.059	GO:0005198	MF	8	structural molecule activity	1	YPR020W,YNL122C,YGR076C,YMR188C,YBL090W,YOR167C,YKL156W,YHR052W,YJL136C,YDL133C-A,YDR077W,YBL038W,YFR032C-A,YNL302C,YNL178W,YJL096W,YBR181C,YBR251W,YDL061C,YJR094W-A,YNL137C,YLR414C
1	!	3.1e-08	227	94	19	0.202	0.084	GO:0003735	MF	8	structural constituent of ribosome	2	YNL122C,YGR076C,YMR188C,YBL090W,YOR167C,YKL156W,YHR052W,YJL136C,YDL133C-A,YBL038W,YFR032C-A,YNL302C,YNL178W,YJL096W,YBR181C,YBR251W,YDL061C,YJR094W-A,YNL137C
1	!	0.00452	24	84	5	0.06	0.208	GO:0046906	MF	10	tetrapyrrole binding	1	YNL111C,YHR007C,YMR015C,YMR073C,YOR065W
1	!	0.00452	24	84	5	0.06	0.208	GO:0020037	MF	10	heme binding	2	YNL111C,YHR007C,YMR015C,YMR073C,YOR065W
1	!	1.01e-05	930	100	35	0.35	0.038	BIOGRID:00000	bi	6	BioGRID interaction data	1	YPR020W,YMR256C,YDL241W,YJL153C,YNL122C,YNL111C,YGR076C,YMR188C,YGR183C,YLR050C,YFR001W,YEL003W,YOR103C,YDR513W,YOL109W,YBR244W,YBL090W,YOL077W-A,YMR098C,YNL070W,YHR007C,YFR011C,YPL057C,YOR167C,YBL059C-A,YHR039C,YDR339C,YML075C,YKL156W,YIL138C,YOR385W,YIL096C,YKL063C,YHR052W,YGR282C
1	!	0.00861	76	96	7	0.073	0.092	KEGG:00190	ke	17	Oxidative phosphorylation	1	YPR020W,YMR256C,YGR183C,YOL077W-A,YOR065W,YLL009C,YMR267W
1	!	0.0459	14	99	3	0.03	0.214	KEGG:00100	ke	13	Steroid biosynthesis	1	YHR007C,YMR015C,YNR019W
1	!	0.000621	180	92	12	0.13	0.067	KEGG:03010	ke	15	Ribosome	1	YMR188C,YOR167C,YKL156W,YJL136C,YDL133C-A,YFR032C-A,YNL302C,YNL178W,YBR181C,YBR251W,YDL061C,YJR094W-A
1	!	0.0199	76	90	7	0.078	0.092	REAC:501247	re	11	Association of phospho-L13a with GAIT element of Ceruloplasmin mRNA	1	YOR167C,YKL156W,YJL136C,YNL302C,YNL178W,YBR181C,YDL061C							1	YOR167C,YKL156W,YJL136C,YNL302C,YNL178W,YBR181C,YDL061C
1	!	0.0167	74	90	7	0.078	0.095	REAC:504643	re	7	Activation of the mRNA upon binding of the cap-binding complex and eIFs, and subsequent binding to 43S	1	YOR167C,YKL156W,YJL136C,YNL302C,YNL178W,YBR181C,YDL061C							complex	and	eIFs,	and	subsequent	binding	to	43S	1	YOR167C,YKL156W,YJL136C,YNL302C,YNL178W,YBR181C,YDL061C
1	!	0.0167	74	90	7	0.078	0.095	REAC:504671	re	7	Translation initiation complex formation	2	YOR167C,YKL156W,YJL136C,YNL302C,YNL178W,YBR181C,YDL061C
1	!	0.0167	74	90	7	0.078	0.095	REAC:502544	re	7	Formation of translation initiation complexes yielding circularized Ceruloplasmin mRNA in a 'closed-loop' conformation	3	YOR167C,YKL156W,YJL136C,YNL302C,YNL178W,YBR181C,YDL061C							in	a	'closed-loop'	conformation	3	YOR167C,YKL156W,YJL136C,YNL302C,YNL178W,YBR181C,YDL061C
1	!	0.0153	73	90	7	0.078	0.096	REAC:502542	re	7	Formation of translation initiation complexes containing mRNA that does not circularize	3	YOR167C,YKL156W,YJL136C,YNL302C,YNL178W,YBR181C,YDL061C							not	circularize	3	YOR167C,YKL156W,YJL136C,YNL302C,YNL178W,YBR181C,YDL061C
1	!	0.0167	74	90	7	0.078	0.095	REAC:504769	re	1	Ribosomal scanning and start codon recognition	1	YOR167C,YKL156W,YJL136C,YNL302C,YNL178W,YBR181C,YDL061C
1	!	0.0167	74	90	7	0.078	0.095	REAC:504040	re	1	Start codon recognition	2	YOR167C,YKL156W,YJL136C,YNL302C,YNL178W,YBR181C,YDL061C
1	!	0.0153	73	90	7	0.078	0.096	REAC:503952	re	1	Ribosomal scanning	2	YOR167C,YKL156W,YJL136C,YNL302C,YNL178W,YBR181C,YDL061C
1	!	0.00906	200	92	12	0.13	0.06	REAC:504343	re	14	Metabolism of proteins	1	YEL003W,YOR167C,YKL156W,YJL136C,YEL034W,YFR032C-A,YNL302C,YNL178W,YBR181C,YDL061C,YKL165C,YJR094W-A
1	!	0.00863	67	90	7	0.078	0.104	REAC:504610	re	4	Formation of the ternary complex, and subsequently, the 43S complex	1	YOR167C,YKL156W,YJL136C,YNL302C,YNL178W,YBR181C,YDL061C							complex	1	YOR167C,YKL156W,YJL136C,YNL302C,YNL178W,YBR181C,YDL061C
1	!	0.00863	67	90	7	0.078	0.104	REAC:502531	re	4	Formation of the 43S pre-initiation complex	2	YOR167C,YKL156W,YJL136C,YNL302C,YNL178W,YBR181C,YDL061C
#INFO: PARAMETERS: sort_by_structure = 1
#INFO: PARAMETERS: user_thr = 1.00
#INFO: PARAMETERS: significant = 1
#INFO: PARAMETERS: ordered_queries = 1
#INFO: PARAMETERS: organism = scerevisiae
#INFO: PARAMETERS: analytical = 1
#INFO: User: g:Profiler web interface
#INFO: Host: ronk1.at.mt.ut.ee
#INFO: Time: 2013-11-29 20:10:57
#INFO: Effective domain size for REAC: 868
#INFO: Effective domain size for GO: 6023
#INFO: Effective domain size for TF: 5667
#INFO: Effective domain size for KEGG: 1849
#INFO: Effective domain size for BIOGRID: 5698
#INFO: Effective domain size for HP: 717
#INFO:
#INFO: --- Gene names and descriptions
#INFO:
#INFO: QUERY: YPR020W ATP20 Subunit g of the mitochondrial F1F0 ATP synthase; reversibly phosphorylated on two residues; unphosphorylated form is required for dimerization of the ATP synthase complex [Source:SGD;Acc:S000006224]																				required	for	dimerization	of	the	ATP	synthase	complex	[Source:SGD;Acc:S000006224]
#INFO: QUERY: YMR256C COX7 Subunit VII of cytochrome c oxidase, which is the terminal member of the mitochondrial inner membrane electron transport chain [Source:SGD;Acc:S000004869]																				electron	transport	chain	[Source:SGD;Acc:S000004869]
#INFO: QUERY: YDL241W YDL241W Putative protein of unknown function; YDL241W is not an essential gene [Source:SGD;Acc:S000002400]
#INFO: QUERY: YJL153C INO1 Inositol-3-phosphate synthase, involved in synthesis of inositol phosphates and inositol-containing phospholipids; transcription is coregulated with other phospholipid biosynthetic genes by Ino2p and Ino4p, which bind the UASINO DNA element [Source:SGD;Acc:S000003689]																				phospholipid	biosynthetic	genes	by	Ino2p	and	Ino4p,	which	bind	the	UASINO	DNA	element	[Source:SGD;Acc:S000003689]
#INFO: QUERY: YNL122C YNL122C Putative protein of unknown function; green fluorescent protein (GFP)-fusion protein localizes to mitochondria; YNL122C is not an essential gene [Source:SGD;Acc:S000005066]																				an	essential	gene	[Source:SGD;Acc:S000005066]
#INFO: QUERY: YKL165C-A YKL165C-A Dubious open reading frame unlikely to encode a protein, based on available experimental and comparative sequence data [Source:SGD;Acc:S000007617]																				data	[Source:SGD;Acc:S000007617]
#INFO: QUERY: YNL111C CYB5 Cytochrome b5, involved in the sterol and lipid biosynthesis pathways; acts as an electron donor to support sterol C5-6 desaturation [Source:SGD;Acc:S000005055]																				support	sterol	C5-6	desaturation	[Source:SGD;Acc:S000005055]
#INFO: QUERY: YNL171C YNL171C Dubious open reading frame unlikely to encode a functional protein, based on available experimental and comparative sequence data [Source:SGD;Acc:S000005115]																				sequence	data	[Source:SGD;Acc:S000005115]
#INFO: QUERY: YGR076C MRPL25 Mitochondrial ribosomal protein of the large subunit [Source:SGD;Acc:S000003308]
#INFO: QUERY: YMR188C MRPS17 Mitochondrial ribosomal protein of the small subunit [Source:SGD;Acc:S000004800]
#INFO: QUERY: YGR183C QCR9 Subunit 9 of the ubiquinol cytochrome-c reductase complex, which is a component of the mitochondrial inner membrane electron transport chain; required for electron transfer at the ubiquinol oxidase site of the complex [Source:SGD;Acc:S000003415]																				membrane	electron	transport	chain;	required	for	electron	transfer	at	the	ubiquinol	oxidase	site	of	the	complex	[Source:SGD;Acc:S000003415]
#INFO: QUERY: YLR050C YLR050C Putative protein of unknown function; green fluorescent protein (GFP)-fusion protein localizes to the endoplasmic reticulum; YLR050C is not an essential gene [Source:SGD;Acc:S000004040]																				is	not	an	essential	gene	[Source:SGD;Acc:S000004040]
#INFO: QUERY: YFR001W LOC1 Nuclear protein involved in asymmetric localization of ASH1 mRNA; binds double-stranded RNA in vitro; constituent of 66S pre-ribosomal particles [Source:SGD;Acc:S000001897]																				66S	pre-ribosomal	particles	[Source:SGD;Acc:S000001897]
#INFO: QUERY: YEL003W GIM4 Subunit of the heterohexameric cochaperone prefoldin complex which binds specifically to cytosolic chaperonin and transfers target proteins to it [Source:SGD;Acc:S000000729]																				proteins	to	it	[Source:SGD;Acc:S000000729]
#INFO: QUERY: YOR102W YOR102W Dubious open reading frame, unlikely to encode a functional protein; extensively overlaps essential OST2 gene encoding a subunit of the ER lumen oligosaccharyltransferase complex [Source:SGD;Acc:S000005628]																				a	subunit	of	the	ER	lumen	oligosaccharyltransferase	complex	[Source:SGD;Acc:S000005628]
#INFO: QUERY: YOR103C OST2 Epsilon subunit of the oligosaccharyltransferase complex of the ER lumen, which catalyzes asparagine-linked glycosylation of newly synthesized proteins [Source:SGD;Acc:S000005629]																				synthesized	proteins	[Source:SGD;Acc:S000005629]
#INFO: QUERY: YKL136W YKL136W Dubious open reading frame unlikely to encode a protein, based on available experimental and comparative sequence data; partially overlaps the verified ORF APL2/YKL135C [Source:SGD;Acc:S000001619]																				data;	partially	overlaps	the	verified	ORF	APL2/YKL135C	[Source:SGD;Acc:S000001619]
#INFO: QUERY: YDR513W GRX2 Cytoplasmic glutaredoxin, thioltransferase, glutathione-dependent disulfide oxidoreductase involved in maintaining redox state of target proteins, also exhibits glutathione peroxidase activity, expression induced in response to stress [Source:SGD;Acc:S000002921]																				glutathione	peroxidase	activity,	expression	induced	in	response	to	stress	[Source:SGD;Acc:S000002921]
#INFO: QUERY: YOL109W ZEO1 Peripheral membrane protein of the plasma membrane that interacts with Mid2p; regulates the cell integrity pathway mediated by Pkc1p and Slt2p; the authentic protein is detected in a phosphorylated state in highly purified mitochondria [Source:SGD;Acc:S000005469]																				mediated	by	Pkc1p	and	Slt2p;	the	authentic	protein	is	detected	in	a	phosphorylated	state	in	highly	purified	mitochondria	[Source:SGD;Acc:S000005469]
#INFO: QUERY: YPL261C YPL261C Dubious open reading frame unlikely to encode a protein; partially overlaps the uncharacterized ORF YPL260W [Source:SGD;Acc:S000006182]
#INFO: QUERY: YBR244W GPX2 Phospholipid hydroperoxide glutathione peroxidase induced by glucose starvation that protects cells from phospholipid hydroperoxides and nonphospholipid peroxides during oxidative stress [Source:SGD;Acc:S000000448]																				peroxides	during	oxidative	stress	[Source:SGD;Acc:S000000448]
#INFO: QUERY: YLR339C YLR339C Dubious open reading frame unlikely to encode a protein, based on available experimental and comparative sequence data; partially overlaps the essential gene RPP0 [Source:SGD;Acc:S000004331]																				data;	partially	overlaps	the	essential	gene	RPP0	[Source:SGD;Acc:S000004331]
#INFO: QUERY: YBL090W MRP21 Mitochondrial ribosomal protein of the small subunit; MRP21 exhibits genetic interactions with mutations in the COX2 and COX3 mRNA 5'-untranslated leader sequences [Source:SGD;Acc:S000000186]																				and	COX3	mRNA	5'-untranslated	leader	sequences	[Source:SGD;Acc:S000000186]
#INFO: QUERY: YOL077W-A ATP19 Subunit k of the mitochondrial F1F0 ATP synthase, which is a large enzyme complex required for ATP synthesis; associated only with the dimeric form of ATP synthase [Source:SGD;Acc:S000007339]																				ATP	synthesis;	associated	only	with	the	dimeric	form	of	ATP	synthase	[Source:SGD;Acc:S000007339]
#INFO: QUERY: YMR098C ATP25 Mitochondrial protein required for the stability of Oli1p (Atp9p) mRNA and for the Oli1p ring formation; YMR098C is not an essential gene [Source:SGD;Acc:S000004704]																				YMR098C	is	not	an	essential	gene	[Source:SGD;Acc:S000004704]
#INFO: QUERY: YNL070W TOM7 Component of the TOM (translocase of outer membrane) complex responsible for recognition and initial import steps for all mitochondrially directed proteins; promotes assembly and stability of the TOM complex [Source:SGD;Acc:S000005014]																				for	all	mitochondrially	directed	proteins;	promotes	assembly	and	stability	of	the	TOM	complex	[Source:SGD;Acc:S000005014]
#INFO: QUERY: YFR010W-A YFR010W-A Dubious ORF unlikely to encode a protein, based on available experimental and comparative sequence data; completely overlaps the uncharacterized gene YFR011C; identified by expression profiling and mass spectrometry [Source:SGD;Acc:S000028824]																				overlaps	the	uncharacterized	gene	YFR011C;	identified	by	expression	profiling	and	mass	spectrometry	[Source:SGD;Acc:S000028824]
#INFO: QUERY: YHR007C ERG11 Lanosterol 14-alpha-demethylase; catalyzes the C-14 demethylation of lanosterol to form 4,4''-dimethyl cholesta-8,14,24-triene-3-beta-ol in the ergosterol biosynthesis pathway; member of the cytochrome P450 family; associated and coordinately regula /.../th the P450 reductase Ncp1p [Source:SGD;Acc:S000001049]																				pathway;	member	of	the	cytochrome	P450	family;	associated	and	coordinately	regula	/.../th	the	P450	reductase	Ncp1p	[Source:SGD;Acc:S000001049]
#INFO: QUERY: YFR011C AIM13 Mitochondrial protein peripheral to the inner membrane; component of the mitochondrial inner membrane organizing system (MINOS, MitOS, or MICOS), a scaffold-like structure on the intermembrane space side of the inner membrane which has a role in the /.../enance of crista junctions and inner membrane architecture [Source:SGD;Acc:S000001907]																				MitOS,	or	MICOS),	a	scaffold-like	structure	on	the	intermembrane	space	side	of	the	inner	membrane	which	has	a	role	in	the	/.../enance	of	crista	junctions	and	inner	membrane	architecture	[Source:SGD;Acc:S000001907]
#INFO: QUERY: YPL057C SUR1 Probable catalytic subunit of a mannosylinositol phosphorylceramide (MIPC) synthase, forms a complex with probable regulatory subunit Csg2p; function in sphingolipid biosynthesis is overlapping with that of Csh1p [Source:SGD;Acc:S000005978]																				Csg2p;	function	in	sphingolipid	biosynthesis	is	overlapping	with	that	of	Csh1p	[Source:SGD;Acc:S000005978]
#INFO: QUERY: YOR167C RPS28A Protein component of the small (40S) ribosomal subunit; nearly identical to Rps28Bp and has similarity to rat S28 ribosomal protein [Source:SGD;Acc:S000005693]																				rat	S28	ribosomal	protein	[Source:SGD;Acc:S000005693]
#INFO: QUERY: YBL059C-A CMC2 Protein of the mitochondrial intermembrane space with a role in respiratory chain complex assembly or maintenance; contains twin Cx9C motifs that can form coiled coil-helix-coiled-coil helix fold [Source:SGD;Acc:S000007488]																				contains	twin	Cx9C	motifs	that	can	form	coiled	coil-helix-coiled-coil	helix	fold	[Source:SGD;Acc:S000007488]
#INFO: QUERY: YHR039C MSC7 Protein of unknown function, green fluorescent protein (GFP)-fusion protein localizes to the endoplasmic reticulum; msc7 mutants are defective in directing meiotic recombination events to homologous chromatids [Source:SGD;Acc:S000001081]																				are	defective	in	directing	meiotic	recombination	events	to	homologous	chromatids	[Source:SGD;Acc:S000001081]
#INFO: QUERY: YDR339C FCF1 Putative PINc domain nuclease required for early cleavages of 35S pre-rRNA and maturation of 18S rRNA; component of the SSU (small subunit) processome involved in 40S ribosomal subunit biogenesis; copurifies with Faf1p [Source:SGD;Acc:S000002747]																				component	of	the	SSU	(small	subunit)	processome	involved	in	40S	ribosomal	subunit	biogenesis;	copurifies	with	Faf1p	[Source:SGD;Acc:S000002747]
#INFO: QUERY: YML075C HMG1 One of two isozymes of HMG-CoA reductase that catalyzes the conversion of HMG-CoA to mevalonate, which is a rate-limiting step in sterol biosynthesis; localizes to the nuclear envelope; overproduction induces the formation of karmellae [Source:SGD;Acc:S000004540]																				is	a	rate-limiting	step	in	sterol	biosynthesis;	localizes	to	the	nuclear	envelope;	overproduction	induces	the	formation	of	karmellae	[Source:SGD;Acc:S000004540]
#INFO: QUERY: YKL156W RPS27A Protein component of the small (40S) ribosomal subunit; nearly identical to Rps27Bp and has similarity to rat S27 ribosomal protein [Source:SGD;Acc:S000001639]																				rat	S27	ribosomal	protein	[Source:SGD;Acc:S000001639]
#INFO: QUERY: YKL156C-A YKL156C-A Dubious open reading frame unlikely to encode a protein; completely overlaps the verified gene RPS27A; identified by gene-trapping, microarray-based expression analysis, and genome-wide homology searching [Source:SGD;Acc:S000028668]																				by	gene-trapping,	microarray-based	expression	analysis,	and	genome-wide	homology	searching	[Source:SGD;Acc:S000028668]
#INFO: QUERY: YIL138C TPM2 Minor isoform of tropomyosin, binds to and stabilizes actin cables and filaments, which direct polarized cell growth and the distribution of several organelles; appears to have distinct and also overlapping functions with Tpm1p [Source:SGD;Acc:S000001400]																				growth	and	the	distribution	of	several	organelles;	appears	to	have	distinct	and	also	overlapping	functions	with	Tpm1p	[Source:SGD;Acc:S000001400]
#INFO: QUERY: YOR385W YOR385W Putative protein of unknown function; green fluorescent protein (GFP)-fusion protein localizes to the cytoplasm; YOR385W is not an essential gene [Source:SGD;Acc:S000005912]																				not	an	essential	gene	[Source:SGD;Acc:S000005912]
#INFO: QUERY: YIL096C YIL096C Putative S-adenosylmethionine-dependent methyltransferase; associates with precursors of the 60S ribosomal subunit; predicted to be involved in ribosome biogenesis [Source:SGD;Acc:S000001358]																				ribosome	biogenesis	[Source:SGD;Acc:S000001358]
#INFO: QUERY: YKL063C YKL063C Putative protein of unknown function; green fluorescent protein (GFP)-fusion protein localizes to the Golgi [Source:SGD;Acc:S000001546]
#INFO: QUERY: YHR052W CIC1 Essential protein that interacts with proteasome components and has a potential role in proteasome substrate specificity; also copurifies with 66S pre-ribosomal particles [Source:SGD;Acc:S000001094]																				also	copurifies	with	66S	pre-ribosomal	particles	[Source:SGD;Acc:S000001094]
#INFO: QUERY: YGL123C-A YGL123C-A Dubious open reading frame unlikely to encode a protein, based on available experimental and comparative sequence data; overlaps the verified gene RPS2/YGL123W [Source:SGD;Acc:S000028634]																				data;	overlaps	the	verified	gene	RPS2/YGL123W	[Source:SGD;Acc:S000028634]
#INFO: QUERY: YGR282C BGL2 Endo-beta-1,3-glucanase, major protein of the cell wall, involved in cell wall maintenance [Source:SGD;Acc:S000003514]
#INFO: QUERY: YOR295W UAF30 Subunit of UAF (upstream activation factor), which is an RNA polymerase I specific transcription stimulatory factor composed of Uaf30p, Rrn5p, Rrn9p, Rrn10p, histones H3 and H4; deletion decreases cellular growth rate [Source:SGD;Acc:S000005821]																				composed	of	Uaf30p,	Rrn5p,	Rrn9p,	Rrn10p,	histones	H3	and	H4;	deletion	decreases	cellular	growth	rate	[Source:SGD;Acc:S000005821]
#INFO: QUERY: YHR138C YHR138C Putative protein of unknown function; has similarity to Pbi2p; double null mutant lacking Pbi2p and Yhr138p exhibits highly fragmented vacuoles [Source:SGD;Acc:S000001180]																				exhibits	highly	fragmented	vacuoles	[Source:SGD;Acc:S000001180]
#INFO: QUERY: YGR222W PET54 Mitochondrial inner membrane protein; binds to the 5' UTR of the COX3 mRNA to activate its translation together with Pet122p and Pet494p; also binds to the COX1 Group I intron AI5 beta to facilitate exon ligation during splicing [Source:SGD;Acc:S000003454]																				translation	together	with	Pet122p	and	Pet494p;	also	binds	to	the	COX1	Group	I	intron	AI5	beta	to	facilitate	exon	ligation	during	splicing	[Source:SGD;Acc:S000003454]
#INFO: QUERY: YJL136C RPS21B Protein component of the small (40S) ribosomal subunit; nearly identical to Rps21Ap and has similarity to rat S21 ribosomal protein [Source:SGD;Acc:S000003672]																				rat	S21	ribosomal	protein	[Source:SGD;Acc:S000003672]
#INFO: QUERY: YEL034W HYP2 Translation elongation factor eIF-5A that may function in translation initiation; similar to and functionally redundant with Anb1p; structural homolog of bacterial EF-P; undergoes an essential hypusination modification [Source:SGD;Acc:S000000760]																				Anb1p;	structural	homolog	of	bacterial	EF-P;	undergoes	an	essential	hypusination	modification	[Source:SGD;Acc:S000000760]
#INFO: QUERY: YEL034C-A YEL034C-A Dubious open reading frame unlikely to encode a protein, based on experimental and comparative sequence data; completely overlaps HYP2/YEL034W, a verified gene that encodes eiF-5A [Source:SGD;Acc:S000028743]																				completely	overlaps	HYP2/YEL034W,	a	verified	gene	that	encodes	eiF-5A	[Source:SGD;Acc:S000028743]
#INFO: QUERY: YLR170C APS1 Small subunit of the clathrin-associated adaptor complex AP-1, which is involved in protein sorting at the trans-Golgi network; homolog of the sigma subunit of the mammalian clathrin AP-1 complex [Source:SGD;Acc:S000004160]																				trans-Golgi	network;	homolog	of	the	sigma	subunit	of	the	mammalian	clathrin	AP-1	complex	[Source:SGD;Acc:S000004160]
#INFO: QUERY: YDR290W YDR290W Dubious open reading frame unlikely to encode a protein, based on available experimental and comparative sequence data; partially overlaps the verified ORF RTT103 [Source:SGD;Acc:S000002698]																				data;	partially	overlaps	the	verified	ORF	RTT103	[Source:SGD;Acc:S000002698]
#INFO: QUERY: YDL133C-A RPL41B Ribosomal protein L47 of the large (60S) ribosomal subunit, identical to Rpl41Ap and has similarity to rat L41 ribosomal protein; comprised of only 25 amino acids; rpl41a rpl41b double null mutant is viable [Source:SGD;Acc:S000002293]																				rat	L41	ribosomal	protein;	comprised	of	only	25	amino	acids;	rpl41a	rpl41b	double	null	mutant	is	viable	[Source:SGD;Acc:S000002293]
#INFO: QUERY: YDR320W-B YDR320W-B Dubious open reading frame unlikely to encode a protein, based on available experimental and comparative sequence data; overlaps the verified gene DAD4/YDR320C-A [Source:SGD;Acc:S000028821]																				data;	overlaps	the	verified	gene	DAD4/YDR320C-A	[Source:SGD;Acc:S000028821]
#INFO: QUERY: YDR077W SED1 Major stress-induced structural GPI-cell wall glycoprotein in stationary-phase cells, associates with translating ribosomes, possible role in mitochondrial genome maintenance; ORF contains two distinct variable minisatellites [Source:SGD;Acc:S000002484]																				mitochondrial	genome	maintenance;	ORF	contains	two	distinct	variable	minisatellites	[Source:SGD;Acc:S000002484]
#INFO: QUERY: YPL273W SAM4 S-adenosylmethionine-homocysteine methyltransferase, functions along with Mht1p in the conversion of S-adenosylmethionine (AdoMet) to methionine to control the methionine/AdoMet ratio [Source:SGD;Acc:S000006194]																				the	methionine/AdoMet	ratio	[Source:SGD;Acc:S000006194]
#INFO: QUERY: YLL044W YLL044W Dubious open reading frame unlikely to encode a protein, based on available experimental and comparative sequence data; transcription of both YLL044W and the overlapping gene RPL8B is reduced in the gcr1 null mutant [Source:SGD;Acc:S000003967]																				data;	transcription	of	both	YLL044W	and	the	overlapping	gene	RPL8B	is	reduced	in	the	gcr1	null	mutant	[Source:SGD;Acc:S000003967]
#INFO: QUERY: YMR015C ERG5 C-22 sterol desaturase, a cytochrome P450 enzyme that catalyzes the formation of the C-22(23) double bond in the sterol side chain in ergosterol biosynthesis; may be a target of azole antifungal drugs [Source:SGD;Acc:S000004617]																				in	the	sterol	side	chain	in	ergosterol	biosynthesis;	may	be	a	target	of	azole	antifungal	drugs	[Source:SGD;Acc:S000004617]
#INFO: QUERY: YIL098C FMC1 Mitochondrial matrix protein, required for assembly or stability at high temperature of the F1 sector of mitochondrial F1F0 ATP synthase; null mutant temperature sensitive growth on glycerol is suppressed by multicopy expression of Odc1p [Source:SGD;Acc:S000001360]																				mitochondrial	F1F0	ATP	synthase;	null	mutant	temperature	sensitive	growth	on	glycerol	is	suppressed	by	multicopy	expression	of	Odc1p	[Source:SGD;Acc:S000001360]
#INFO: QUERY: YMR011W HXT2 High-affinity glucose transporter of the major facilitator superfamily, expression is induced by low levels of glucose and repressed by high levels of glucose [Source:SGD;Acc:S000004613]																				and	repressed	by	high	levels	of	glucose	[Source:SGD;Acc:S000004613]
#INFO: QUERY: YBL038W MRPL16 Mitochondrial ribosomal protein of the large subunit [Source:SGD;Acc:S000000134]
#INFO: QUERY: YLR051C FCF2 Essential nucleolar protein involved in the early steps of 35S rRNA processing; interacts with Faf1p; member of a transcriptionally co-regulated set of genes called the RRB regulon [Source:SGD;Acc:S000004041]																				of	a	transcriptionally	co-regulated	set	of	genes	called	the	RRB	regulon	[Source:SGD;Acc:S000004041]
#INFO: QUERY: YPR128C ANT1 Peroxisomal adenine nucleotide transporter; involved in beta-oxidation of medium-chain fatty acid; required for peroxisome proliferation [Source:SGD;Acc:S000006332]
#INFO: QUERY: YBR087W RFC5 Subunit of heteropentameric Replication factor C (RF-C), which is a DNA binding protein and ATPase that acts as a clamp loader of the proliferating cell nuclear antigen (PCNA) processivity factor for DNA polymerases delta and epsilon [Source:SGD;Acc:S000000291]																				acts	as	a	clamp	loader	of	the	proliferating	cell	nuclear	antigen	(PCNA)	processivity	factor	for	DNA	polymerases	delta	and	epsilon	[Source:SGD;Acc:S000000291]
#INFO: QUERY: YOR248W YOR248W Dubious open reading frame unlikely to encode a functional protein, based on available experimental and comparative sequence data [Source:SGD;Acc:S000005774]																				sequence	data	[Source:SGD;Acc:S000005774]
#INFO: QUERY: YER071C TDA2 Protein of unknown function; green fluorescent protein (GFP)-fusion protein localizes to the cytoplasm in a punctate pattern; null mutant is sensitive to expression of the top1-T722A allele [Source:SGD;Acc:S000000873]																				pattern;	null	mutant	is	sensitive	to	expression	of	the	top1-T722A	allele	[Source:SGD;Acc:S000000873]
#INFO: QUERY: YER124C DSE1 Daughter cell-specific protein, may regulate cross-talk between the mating and filamentation pathways; deletion affects cell separation after division and sensitivity to alpha-factor and drugs affecting the cell wall [Source:SGD;Acc:S000000926]																				after	division	and	sensitivity	to	alpha-factor	and	drugs	affecting	the	cell	wall	[Source:SGD;Acc:S000000926]
#INFO: QUERY: YFR032C-A RPL29 Protein component of the large (60S) ribosomal subunit, has similarity to rat L29 ribosomal protein; not essential for translation, but required for proper joining of the large and small ribosomal subunits and for normal translation rate [Source:SGD;Acc:S000006437]																				essential	for	translation,	but	required	for	proper	joining	of	the	large	and	small	ribosomal	subunits	and	for	normal	translation	rate	[Source:SGD;Acc:S000006437]
#INFO: QUERY: YOR320C GNT1 N-acetylglucosaminyltransferase capable of modification of N-linked glycans in the Golgi apparatus [Source:SGD;Acc:S000005847]
#INFO: QUERY: YNL302C RPS19B Protein component of the small (40S) ribosomal subunit, required for assembly and maturation of pre-40 S particles; mutations in human RPS19 are associated with Diamond Blackfan anemia; nearly identical to Rps19Ap [Source:SGD;Acc:S000005246]																				particles;	mutations	in	human	RPS19	are	associated	with	Diamond	Blackfan	anemia;	nearly	identical	to	Rps19Ap	[Source:SGD;Acc:S000005246]
#INFO: QUERY: YNL178W RPS3 Protein component of the small (40S) ribosomal subunit, has apurinic/apyrimidinic (AP) endonuclease activity; essential for viability; has similarity to E. coli S3 and rat S3 ribosomal proteins [Source:SGD;Acc:S000005122]																				has	similarity	to	E.	coli	S3	and	rat	S3	ribosomal	proteins	[Source:SGD;Acc:S000005122]
#INFO: QUERY: YJL096W MRPL49 Mitochondrial ribosomal protein of the large subunit [Source:SGD;Acc:S000003632]
#INFO: QUERY: YBR181C RPS6B Protein component of the small (40S) ribosomal subunit; identical to Rps6Ap and has similarity to rat S6 ribosomal protein [Source:SGD;Acc:S000000385]																				S6	ribosomal	protein	[Source:SGD;Acc:S000000385]
#INFO: QUERY: YKR016W FCJ1 Mitochondrial inner membrane protein, ortholog of mammalian mitofilin; involved in import of intermembrane space (IMS) proteins, probably by positioning Mia40p relative to the TOM complex to receive incoming proteins; also has an essential role in t /.../ntenance of crista junctions and inner membrane architecture, as a component of the mitochondrial inner membrane orga…																				probably	by	positioning	Mia40p	relative	to	the	TOM	complex	to	receive	incoming	proteins;	also	has	an	essential	role	in	t	/.../ntenance	of	crista	junctions	and	inner	membrane	architecture,	as	a
#INFO: QUERY: YKR090W PXL1 LIM domain-containing protein that localizes to sites of polarized growth, required for selection and/or maintenance of polarized growth sites, may modulate signaling by the GTPases Cdc42p and Rho1p; has similarity to metazoan paxillin [Source:SGD;Acc:S000001798]																				polarized	growth	sites,	may	modulate	signaling	by	the	GTPases	Cdc42p	and	Rho1p;	has	similarity	to	metazoan	paxillin	[Source:SGD;Acc:S000001798]
#INFO: QUERY: YJR135W-A TIM8 Mitochondrial intermembrane space protein, forms a complex with Tim13p that delivers a subset of hydrophobic proteins to the TIM22 complex for inner membrane insertion; homolog of human TIMM8A, implicated in Mohr-Tranebjaerg syndrome [Source:SGD;Acc:S000007348]																				to	the	TIM22	complex	for	inner	membrane	insertion;	homolog	of	human	TIMM8A,	implicated	in	Mohr-Tranebjaerg	syndrome	[Source:SGD;Acc:S000007348]
#INFO: QUERY: YKR071C DRE2 Conserved component of an early step in the cytosolic Fe-S protein assembly (CIA) machinery; contains an Fe-S cluster that receives electrons from NADPH via the action of Tah18p; ortholog of human Ciapin1 [Source:SGD;Acc:S000001779]																				Fe-S	cluster	that	receives	electrons	from	NADPH	via	the	action	of	Tah18p;	ortholog	of	human	Ciapin1	[Source:SGD;Acc:S000001779]
#INFO: QUERY: YMR077C VPS20 Myristoylated subunit of ESCRTIII, the endosomal sorting complex required for transport of transmembrane proteins into the multivesicular body pathway to the lysosomal/vacuolar lumen; cytoplasmic protein recruited to endosomal membranes [Source:SGD;Acc:S000004682]																				multivesicular	body	pathway	to	the	lysosomal/vacuolar	lumen;	cytoplasmic	protein	recruited	to	endosomal	membranes	[Source:SGD;Acc:S000004682]
#INFO: QUERY: YMR269W TMA23 Nucleolar protein implicated in ribosome biogenesis; deletion extends chronological lifespan [Source:SGD;Acc:S000004882]
#INFO: QUERY: YKL066W YKL066W Dubious open reading frame, unlikely to encode a protein; not conserved in closely related Saccharomyces species; partially overlaps the verified gene YNK1 [Source:SGD;Acc:S000001549]																				partially	overlaps	the	verified	gene	YNK1	[Source:SGD;Acc:S000001549]
#INFO: QUERY: YMR073C IRC21 Putative protein of unknown function; may be involved in resistance to carboplatin and cisplatin; null mutant displays increase in spontaneous Rad52p foci; contains a lipid-binding domain and binds cardiolipin in a large-scale study [Source:SGD;Acc:S000004677]																				displays	increase	in	spontaneous	Rad52p	foci;	contains	a	lipid-binding	domain	and	binds	cardiolipin	in	a	large-scale	study	[Source:SGD;Acc:S000004677]
#INFO: QUERY: YLR171W YLR171W Dubious open reading frame unlikely to encode a functional protein, based on available experimental and comparative sequence data [Source:SGD;Acc:S000004161]																				sequence	data	[Source:SGD;Acc:S000004161]
#INFO: QUERY: YBR251W MRPS5 Mitochondrial ribosomal protein of the small subunit [Source:SGD;Acc:S000000455]
#INFO: QUERY: YOR065W CYT1 Cytochrome c1, component of the mitochondrial respiratory chain; expression is regulated by the heme-activated, glucose-repressed Hap2p/3p/4p/5p CCAAT-binding complex [Source:SGD;Acc:S000005591]																				CCAAT-binding	complex	[Source:SGD;Acc:S000005591]
#INFO: QUERY: YJL026W RNR2 Ribonucleotide-diphosphate reductase (RNR), small subunit; the RNR complex catalyzes the rate-limiting step in dNTP synthesis and is regulated by DNA replication and DNA damage checkpoint pathways via localization of the small subunits [Source:SGD;Acc:S000003563]																				is	regulated	by	DNA	replication	and	DNA	damage	checkpoint	pathways	via	localization	of	the	small	subunits	[Source:SGD;Acc:S000003563]
#INFO: QUERY: YDR168W CDC37 Essential Hsp90p co-chaperone; necessary for passage through the START phase of the cell cycle; stabilizes protein kinase nascent chains and participates along with Hsp90p in their folding [Source:SGD;Acc:S000002575]																				kinase	nascent	chains	and	participates	along	with	Hsp90p	in	their	folding	[Source:SGD;Acc:S000002575]
#INFO: QUERY: YLR068W FYV7 Essential protein required for maturation of 18S rRNA; required for survival upon exposure to K1 killer toxin [Source:SGD;Acc:S000004058]																				toxin	[Source:SGD;Acc:S000004058]
#INFO: QUERY: YLL009C COX17 Copper metallochaperone that transfers copper to Sco1p and Cox11p for eventual delivery to cytochrome c oxidase; contains twin cysteine-x9-cysteine motifs [Source:SGD;Acc:S000003932]																				contains	twin	cysteine-x9-cysteine	motifs	[Source:SGD;Acc:S000003932]
#INFO: QUERY: YBR091C TIM12 Essential protein of the inner mitochondrial membrane, peripherally localized; component of the TIM22 complex, which is a twin-pore translocase that mediates insertion of numerous multispanning inner membrane proteins [Source:SGD;Acc:S000000295]																				a	twin-pore	translocase	that	mediates	insertion	of	numerous	multispanning	inner	membrane	proteins	[Source:SGD;Acc:S000000295]
#INFO: QUERY: YDL061C RPS29B Protein component of the small (40S) ribosomal subunit; nearly identical to Rps29Ap and has similarity to rat S29 and E. coli S14 ribosomal proteins [Source:SGD;Acc:S000002219]																				rat	S29	and	E.	coli	S14	ribosomal	proteins	[Source:SGD;Acc:S000002219]
#INFO: QUERY: YKL165C MCD4 Protein involved in glycosylphosphatidylinositol (GPI) anchor synthesis; multimembrane-spanning protein that localizes to the endoplasmic reticulum; highly conserved among eukaryotes [Source:SGD;Acc:S000001648]																				conserved	among	eukaryotes	[Source:SGD;Acc:S000001648]
#INFO: QUERY: YJR094W-A RPL43B Protein component of the large (60S) ribosomal subunit, identical to Rpl43Ap and has similarity to rat L37a ribosomal protein [Source:SGD;Acc:S000003855]																				L37a	ribosomal	protein	[Source:SGD;Acc:S000003855]
#INFO: QUERY: YBR167C POP7 Subunit of both RNase MRP and nuclear RNase P; RNase MRP cleaves pre-rRNA, while nuclear RNase P cleaves tRNA precursors to generate mature 5' ends and facilitates turnover of nuclear RNAs [Source:SGD;Acc:S000000371]																				P	cleaves	tRNA	precursors	to	generate	mature	5'	ends	and	facilitates	turnover	of	nuclear	RNAs	[Source:SGD;Acc:S000000371]
#INFO: QUERY: YNL137C NAM9 Mitochondrial ribosomal component of the small subunit [Source:SGD;Acc:S000005081]
#INFO: QUERY: YBL100C YBL100C Dubious open reading frame unlikely to encode a protein, based on available experimental and comparative sequence data; almost completely overlaps the 5' end of ATP1 [Source:SGD;Acc:S000000196]																				data;	almost	completely	overlaps	the	5'	end	of	ATP1	[Source:SGD;Acc:S000000196]
#INFO: QUERY: YMR267W PPA2 Mitochondrial inorganic pyrophosphatase, required for mitochondrial function and possibly involved in energy generation from inorganic pyrophosphate [Source:SGD;Acc:S000004880]																				[Source:SGD;Acc:S000004880]
#INFO: QUERY: YLR414C PUN1 Plasma membrane protein with a role in cell wall integrity; co-localizes with Sur7p in punctate membrane patches; null mutant displays decreased thermotolerance; transcription induced upon cell wall damage and metal ion stress [Source:SGD;Acc:S000004406]																				patches;	null	mutant	displays	decreased	thermotolerance;	transcription	induced	upon	cell	wall	damage	and	metal	ion	stress	[Source:SGD;Acc:S000004406]
#INFO: QUERY: YLR282C YLR282C Dubious open reading frame unlikely to encode a functional protein, based on available experimental and comparative sequence data; deletion mutation confers an increase in Ty1 transposition [Source:SGD;Acc:S000004272]																				sequence	data;	deletion	mutation	confers	an	increase	in	Ty1	transposition	[Source:SGD;Acc:S000004272]
#INFO: QUERY: YNR019W ARE2 Acyl-CoA:sterol acyltransferase, isozyme of Are1p; endoplasmic reticulum enzyme that contributes the major sterol esterification activity in the presence of oxygen [Source:SGD;Acc:S000005302]																				the	presence	of	oxygen	[Source:SGD;Acc:S000005302]
#INFO: QUERY: YKL056C TMA19 Protein that associates with ribosomes; homolog of translationally controlled tumor protein; green fluorescent protein (GFP)-fusion protein localizes to the cytoplasm and relocates to the mitochondrial outer surface upon oxidative stress [Source:SGD;Acc:S000001539]																				localizes	to	the	cytoplasm	and	relocates	to	the	mitochondrial	outer	surface	upon	oxidative	stress	[Source:SGD;Acc:S000001539]
#INFO:
#INFO:	---	BIOGRID	neighbours
#INFO:
#INFO:	BIOGRID	NEIGHBOUR:	AI2	Reverse	transcriptase	required	for	splicing	of	the	COX1	pre-mRNA,	encoded	by	a	mobile	group	II	intron	within	the	mitochondrial	COX1	gene	[Source:SGD;Acc:S000007262]
#INFO:	BIOGRID	NEIGHBOUR:	BDF1	Protein	involved	in	transcription	initiation	at	TATA-containing	promoters;	associates	with	the	basal	transcription	factor	TFIID;	contains	two	bromodomains;	corresponds	to	the	C-terminal	region	of	mammalian	TAF1;	redundant	with	Bdf2p	[Source:SGD;Acc:S000004391]
#INFO:	BIOGRID	NEIGHBOUR:	SSA2	ATP	binding	protein	involved	in	protein	folding	and	vacuolar	import	of	proteins;	member	of	heat	shock	protein	70	(HSP70)	family;	associated	with	the	chaperonin-containing	T-complex;	present	in	the	cytoplasm,	vacuolar	membrane	and	cell	wall;	0.98	iden	/.../with	Ssa1p,	but	subtle	differences	between	the	two	proteins	provide
#INFO:	BIOGRID	NEIGHBOUR:	KCS1	Inositol	hexakisphosphate	(IP6)	and	inositol	heptakisphosphate	(IP7)	kinase;	generation	of	high	energy	inositol	pyrophosphates	by	Kcs1p	is	required	for	many	processes	such	as	vacuolar	biogenesis,	stress	response	and	telomere	maintenance	[Source:SGD;Acc:S000002424]
#INFO:	BIOGRID	NEIGHBOUR:	PRP31	Splicing	factor,	component	of	the	U4/U6-U5	snRNP	complex	[Source:SGD;Acc:S000003323]
#INFO:	BIOGRID	NEIGHBOUR:	LTV1	Component	of	the	GSE	complex,	which	is	required	for	proper	sorting	of	amino	acid	permease	Gap1p;	required	for	ribosomal	small	subunit	export	from	nucleus;	required	for	growth	at	low	temperature	[Source:SGD;Acc:S000001626]
#INFO:	BIOGRID	NEIGHBOUR:	SCL1	Alpha	1	subunit	of	the	20S	proteasome	involved	in	the	degradation	of	ubiquitinated	substrates;	20S	proteasome	is	the	core	complex	of	the	26S	proteasome;	essential	for	growth;	detected	in	the	mitochondria	[Source:SGD;Acc:S000002979]
#INFO:	BIOGRID	NEIGHBOUR:	ISD11	Cysteine	desulfurase	(Nfs1p)	activator;	essential	for	the	formation	of	the	persulfide	intermediate	at	the	desulfurase	active	site	during	pyridoxal	phosphate-dependent	desulfuration	of	cysteine;	required	for	mitochondrial	iron-sulfur	cluster	biosynthesis	[Source:SGD;Acc:S000007237]
#INFO:	BIOGRID	NEIGHBOUR:	ZIP1	Transverse	filament	protein	of	the	synaptonemal	complex;	required	for	normal	levels	of	meiotic	recombination	and	pairing	between	homologous	chromosome	during	meiosis;	potential	Cdc28p	substrate	[Source:SGD;Acc:S000002693]
#INFO:	BIOGRID	NEIGHBOUR:	GEP3	Protein	of	unknown	function;	null	mutant	is	defective	in	respiration	and	interacts	synthetically	with	prohibitin	(phb1);	the	authentic,	non-tagged	protein	is	detected	in	purified	mitochondria	in	high-throughput	studies	[Source:SGD;Acc:S000005731]
#INFO:	BIOGRID	NEIGHBOUR:	CHC1	Clathrin	heavy	chain,	subunit	of	the	major	coat	protein	involved	in	intracellular	protein	transport	and	endocytosis;	two	heavy	chains	form	the	clathrin	triskelion	structural	component;	the	light	chain	(CLC1)	is	thought	to	regulate	function	[Source:SGD;Acc:S000003174]
#INFO:	BIOGRID	NEIGHBOUR:	MYO1	Type	II	myosin	heavy	chain,	required	for	wild-type	cytokinesis	and	cell	separation;	localizes	to	the	actomyosin	ring;	binds	to	myosin	light	chains	Mlc1p	and	Mlc2p	through	its	IQ1	and	IQ2	motifs	respectively	[Source:SGD;Acc:S000001065]
#INFO:	BIOGRID	NEIGHBOUR:	HRK1	Protein	kinase	implicated	in	activation	of	the	plasma	membrane	H(+)-ATPase	Pma1p	in	response	to	glucose	metabolism;	plays	a	role	in	ion	homeostasis	[Source:SGD;Acc:S000005793]
#INFO:	BIOGRID	NEIGHBOUR:	ISA2	Protein	required	for	maturation	of	mitochondrial	[4Fe-4S]	proteins;	functions	in	a	complex	with	Isa1p	and	possibly	Iba57p;	localizes	to	the	mitochondrial	intermembrane	space,	overexpression	of	ISA2	suppresses	grx5	mutations	[Source:SGD;Acc:S000006271]
#INFO:	BIOGRID	NEIGHBOUR:	NOP4	Nucleolar	protein,	essential	for	processing	and	maturation	of	27S	pre-rRNA	and	large	ribosomal	subunit	biogenesis;	constituent	of	66S	pre-ribosomal	particles;	contains	four	RNA	recognition	motifs	(RRMs)	[Source:SGD;Acc:S000005964]
#INFO:	BIOGRID	NEIGHBOUR:	UTP20	Component	of	the	small-subunit	(SSU)	processome,	which	is	involved	in	the	biogenesis	of	the	18S	rRNA	[Source:SGD;Acc:S000000100]
#INFO:	BIOGRID	NEIGHBOUR:	FMP43	Putative	protein	of	unknown	function;	expression	regulated	by	osmotic	and	alkaline	stresses;	the	authentic,	non-tagged	protein	is	detected	in	highly	purified	mitochondria	in	high-throughput	studies	[Source:SGD;Acc:S000003475]
#INFO:	BIOGRID	NEIGHBOUR:	FUN12	GTPase,	required	for	general	translation	initiation	by	promoting	Met-tRNAiMet	binding	to	ribosomes	and	ribosomal	subunit	joining;	homolog	of	bacterial	IF2	[Source:SGD;Acc:S000000033]
#INFO:	BIOGRID	NEIGHBOUR:	TIM9	Essential	protein	of	the	mitochondrial	intermembrane	space,	forms	a	complex	with	Tim10p	(TIM10	complex)	that	delivers	hydrophobic	proteins	to	the	TIM22	complex	for	insertion	into	the	inner	membrane	[Source:SGD;Acc:S000007256]
#INFO:	BIOGRID	NEIGHBOUR:	SDH2	Iron-sulfur	protein	subunit	of	succinate	dehydrogenase	(Sdh1p,	Sdh2p,	Sdh3p,	Sdh4p),	which	couples	the	oxidation	of	succinate	to	the	transfer	of	electrons	to	ubiquinone	as	part	of	the	TCA	cycle	and	the	mitochondrial	respiratory	chain	[Source:SGD;Acc:S000003964]
#INFO:	BIOGRID	NEIGHBOUR:	RIM1	Single-stranded	DNA-binding	protein	essential	for	mitochondrial	genome	maintenance;	involved	in	mitochondrial	DNA	replication	[Source:SGD;Acc:S000007222]
#INFO:	BIOGRID	NEIGHBOUR:	GIS2	Translational	activator	for	mRNAs	with	internal	ribosome	entry	sites;	associates	with	polysomes	and	binds	to	a	specific	subset	of	mRNAs;	ortholog	of	human	ZNF9/CNBP,	a	gene	involved	in	myotonic	dystrophy	type	2	[Source:SGD;Acc:S000005199]
#INFO:	BIOGRID	NEIGHBOUR:	RSM10	Mitochondrial	ribosomal	protein	of	the	small	subunit,	has	similarity	to	E.	coli	S10	ribosomal	protein;	essential	for	viability,	unlike	most	other	mitoribosomal	proteins	[Source:SGD;Acc:S000002448]
#INFO:	BIOGRID	NEIGHBOUR:	ARV1	Protein	functioning	in	transport	of	glycosylphosphatidylinositol	intermediates	into	ER	lumen;	required	for	normal	intracellular	sterol	distribution;	human	ARV1	required	for	normal	cholesterol	and	bile	acid	homeostasis;	similar	to	Nup120p	[Source:SGD;Acc:S000004232]
#INFO:	BIOGRID	NEIGHBOUR:	COX9	Subunit	VIIa	of	cytochrome	c	oxidase,	which	is	the	terminal	member	of	the	mitochondrial	inner	membrane	electron	transport	chain	[Source:SGD;Acc:S000002225]
#INFO:	BIOGRID	NEIGHBOUR:	COX5A	Subunit	Va	of	cytochrome	c	oxidase,	which	is	the	terminal	member	of	the	mitochondrial	inner	membrane	electron	transport	chain;	predominantly	expressed	during	aerobic	growth	while	its	isoform	Vb	(Cox5Bp)	is	expressed	during	anaerobic	growth	[Source:SGD;Acc:S000004997]
#INFO:	BIOGRID	NEIGHBOUR:	SHE3	Protein	that	acts	as	an	adaptor	between	Myo4p	and	the	She2p-mRNA	complex;	part	of	the	mRNA	localization	machinery	that	restricts	accumulation	of	certain	proteins	to	the	bud;	also	required	for	cortical	ER	inheritance	[Source:SGD;Acc:S000000334]
#INFO:	BIOGRID	NEIGHBOUR:	TDH3	Glyceraldehyde-3-phosphate	dehydrogenase,	isozyme	3,	involved	in	glycolysis	and	gluconeogenesis;	tetramer	that	catalyzes	the	reaction	of	glyceraldehyde-3-phosphate	to	1,3	bis-phosphoglycerate;	detected	in	the	cytoplasm	and	cell	wall	[Source:SGD;Acc:S000003424]
#INFO:	BIOGRID	NEIGHBOUR:	SEN15	Subunit	of	the	tRNA	splicing	endonuclease,	which	is	composed	of	Sen2p,	Sen15p,	Sen34p,	and	Sen54p	[Source:SGD;Acc:S000004663]
#INFO:	BIOGRID	NEIGHBOUR:	KRE27	Member	of	a	transmembrane	complex	required	for	efficient	folding	of	proteins	in	the	ER;	null	mutant	displays	induction	of	the	unfolded	protein	response,	and	also	shows	K1	killer	toxin	resistance	[Source:SGD;Acc:S000001289]
#INFO:	BIOGRID	NEIGHBOUR:	RPN11	Metalloprotease	subunit	of	the	19S	regulatory	particle	of	the	26S	proteasome	lid;	couples	the	deubiquitination	and	degradation	of	proteasome	substrates;	involved,	independent	of	catalytic	activity,	in	fission	of	mitochondria	and	peroxisomes	[Source:SGD;Acc:S000001900]
#INFO:	BIOGRID	NEIGHBOUR:	CBP6	Mitochondrial	protein	required	for	translation	of	the	COB	mRNA;	forms	a	complex	with	Cbp3p	that	binds	to	mt	ribosomes	near	the	polypeptide	tunnel	exit	and	promotes	efficient	translation	of	the	COB	mRNA;	Cbp3p-Cbp6p	complex	also	interacts	with	newly	/.../sized	cytochrome	b	(Cobp)	and	Cbp4p	to	promote
#INFO:	BIOGRID	NEIGHBOUR:	TMA20	Protein	of	unknown	function	that	associates	with	ribosomes	and	has	a	putative	RNA	binding	domain;	interacts	with	Tma22p;	null	mutant	exhibits	translation	defects;	has	homology	to	human	oncogene	MCT-1	[Source:SGD;Acc:S000002957]
#INFO:	BIOGRID	NEIGHBOUR:	MCA1	Putative	cysteine	protease	similar	to	mammalian	caspases;	involved	in	regulation	of	apoptosis	upon	H2O2	treatment;	contributes	to	clearance	of	insoluble	protein	aggregates	during	normal	growth;	may	be	involved	in	cell	cycle	progression	[Source:SGD;Acc:S000005723]
#INFO:	BIOGRID	NEIGHBOUR:	TIM10	Essential	protein	of	the	mitochondrial	intermembrane	space,	forms	a	complex	with	Tim9p	(TIM10	complex)	that	delivers	hydrophobic	proteins	to	the	TIM22	complex	for	insertion	into	the	inner	membrane	[Source:SGD;Acc:S000003530]
#INFO:	BIOGRID	NEIGHBOUR:	GCD11	Gamma	subunit	of	the	translation	initiation	factor	eIF2,	involved	in	the	identification	of	the	start	codon;	binds	GTP	when	forming	the	ternary	complex	with	GTP	and	tRNAi-Met	[Source:SGD;Acc:S000000827]
#INFO:	BIOGRID	NEIGHBOUR:	MDM12	Mitochondrial	outer	membrane	protein,	required	for	transmission	of	mitochondria	to	daughter	cells;	component	of	the	ERMES	complex	that	links	the	ER	to	mitochondria;	may	influence	import	and	assembly	of	outer	membrane	beta-barrel	proteins	[Source:SGD;Acc:S000005369]
#INFO:	BIOGRID	NEIGHBOUR:	CIK1	Kinesin-associated	protein	required	for	both	karyogamy	and	mitotic	spindle	organization,	interacts	stably	and	specifically	with	Kar3p	and	may	function	to	target	this	kinesin	to	a	specific	cellular	role;	has	similarity	to	Vik1p	[Source:SGD;Acc:S000004811]
#INFO:	BIOGRID	NEIGHBOUR:	ADY3	Protein	required	for	spore	wall	formation,	thought	to	mediate	assembly	of	a	Don1p-containing	structure	at	the	leading	edge	of	the	prospore	membrane	via	interaction	with	spindle	pole	body	components;	potentially	phosphorylated	by	Cdc28p	[Source:SGD;Acc:S000002398]
#INFO:	BIOGRID	NEIGHBOUR:	YBL095W	Putative	protein	of	unknown	function;	the	authentic,	non-tagged	protein	is	detected	in	highly	purified	mitochondria	in	high-throughput	studies	[Source:SGD;Acc:S000000191]
#INFO:	BIOGRID	NEIGHBOUR:	RPT1	One	of	six	ATPases	of	the	19S	regulatory	particle	of	the	26S	proteasome	involved	in	the	degradation	of	ubiquitinated	substrates;	required	for	optimal	CDC20	transcription;	interacts	with	Rpn12p	and	Ubr1p;	mutant	has	aneuploidy	tolerance	[Source:SGD;Acc:S000001628]
#INFO:	BIOGRID	NEIGHBOUR:	ERG27	3-keto	sterol	reductase,	catalyzes	the	last	of	three	steps	required	to	remove	two	C-4	methyl	groups	from	an	intermediate	in	ergosterol	biosynthesis;	mutants	are	sterol	auxotrophs	[Source:SGD;Acc:S000004090]
#INFO:	BIOGRID	NEIGHBOUR:	HSP10	Mitochondrial	matrix	co-chaperonin	that	inhibits	the	ATPase	activity	of	Hsp60p,	a	mitochondrial	chaperonin;	involved	in	protein	folding	and	sorting	in	the	mitochondria;	10	kD	heat	shock	protein	with	similarity	to	E.	coli	groES	[Source:SGD;Acc:S000005546]
#INFO:	BIOGRID	NEIGHBOUR:	ILV5	Bifunctional	acetohydroxyacid	reductoisomerase	and	mtDNA	binding	protein;	involved	in	branched-chain	amino	acid	biosynthesis	and	maintenance	of	wild-type	mitochondrial	DNA;	found	in	mitochondrial	nucleoids	[Source:SGD;Acc:S000004347]
#INFO:	BIOGRID	NEIGHBOUR:	RSM24	Mitochondrial	ribosomal	protein	of	the	small	subunit	[Source:SGD;Acc:S000002582]
#INFO:	BIOGRID	NEIGHBOUR:	LSC1	Alpha	subunit	of	succinyl-CoA	ligase,	which	is	a	mitochondrial	enzyme	of	the	TCA	cycle	that	catalyzes	the	nucleotide-dependent	conversion	of	succinyl-CoA	to	succinate;	phosphorylated	[Source:SGD;Acc:S000005668]
#INFO:	BIOGRID	NEIGHBOUR:	PUF3	Protein	of	the	mitochondrial	outer	surface,	links	the	Arp2/3	complex	with	the	mitochore	during	anterograde	mitochondrial	movement;	also	binds	to	and	promotes	degradation	of	mRNAs	for	select	nuclear-encoded	mitochondrial	proteins	[Source:SGD;Acc:S000003936]
#INFO:	BIOGRID	NEIGHBOUR:	BUL2	Component	of	the	Rsp5p	E3-ubiquitin	ligase	complex,	involved	in	intracellular	amino	acid	permease	sorting,	functions	in	heat	shock	element	mediated	gene	expression,	essential	for	growth	in	stress	conditions,	functional	homolog	of	BUL1	[Source:SGD;Acc:S000004579]
#INFO:	BIOGRID	NEIGHBOUR:	RPS18A	Protein	component	of	the	small	(40S)	ribosomal	subunit;	nearly	identical	to	Rps18Bp	and	has	similarity	to	E.	coli	S13	and	rat	S18	ribosomal	proteins	[Source:SGD;Acc:S000002858]
#INFO:	BIOGRID	NEIGHBOUR:	MRPS35	Mitochondrial	ribosomal	protein	of	the	small	subunit;	null	mutant	does	not	grow	on	glycerol,	is	sensitive	to	2,4-dichlorophenol,	and	accumulates	large	lipid	droplets	[Source:SGD;Acc:S000003397]
#INFO:	BIOGRID	NEIGHBOUR:	CHS3	Chitin	synthase	III,	catalyzes	the	transfer	of	N-acetylglucosamine	(GlcNAc)	to	chitin;	required	for	synthesis	of	the	majority	of	cell	wall	chitin,	the	chitin	ring	during	bud	emergence,	and	spore	wall	chitosan	[Source:SGD;Acc:S000000227]
#INFO:	BIOGRID	NEIGHBOUR:	RPL33A	N-terminally	acetylated	ribosomal	protein	L37	of	the	large	(60S)	ribosomal	subunit,	nearly	identical	to	Rpl33Bp	and	has	similarity	to	rat	L35a;	rpl33a	null	mutant	exhibits	slow	growth	while	rpl33a	rpl33b	double	null	mutant	is	inviable	[Source:SGD;Acc:S000006064]
#INFO:	BIOGRID	NEIGHBOUR:	IFA38	Microsomal	beta-keto-reductase;	contains	oleate	response	element	(ORE)	sequence	in	the	promoter	region;	mutants	exhibit	reduced	VLCFA	synthesis,	accumulate	high	levels	of	dihydrosphingosine,	phytosphingosine	and	medium-chain	ceramides	[Source:SGD;Acc:S000000363]
#INFO:	BIOGRID	NEIGHBOUR:	RPL42A	Protein	component	of	the	large	(60S)	ribosomal	subunit,	identical	to	Rpl42Ap	and	has	similarity	to	rat	L44;	required	for	propagation	of	the	killer	toxin-encoding	M1	double-stranded	RNA	satellite	of	the	L-A	double-stranded	RNA	virus	[Source:SGD;Acc:S000001183]
#INFO:	BIOGRID	NEIGHBOUR:	OM14	Integral	mitochondrial	outer	membrane	protein;	abundance	is	decreased	in	cells	grown	in	glucose	relative	to	other	carbon	sources;	appears	to	contain	3	alpha-helical	transmembrane	segments;	ORF	encodes	a	97-basepair	intron	[Source:SGD;Acc:S000000434]
#INFO:	BIOGRID	NEIGHBOUR:	IRE1	Serine-threonine	kinase	and	endoribonuclease;	transmembrane	protein	that	mediates	the	unfolded	protein	response	(UPR)	by	regulating	Hac1p	synthesis	through	HAC1	mRNA	splicing;	Kar2p	binds	inactive	Ire1p	and	releases	from	it	upon	ER	stress	[Source:SGD;Acc:S000001121]
#INFO:	BIOGRID	NEIGHBOUR:	IRC5	Putative	ATPase	containing	the	DEAD/H	helicase-related	sequence	motif;	null	mutant	displays	increased	levels	of	spontaneous	Rad52p	foci	[Source:SGD;Acc:S000001934]
#INFO:	BIOGRID	NEIGHBOUR:	FMP16	Putative	protein	of	unknown	function;	proposed	to	be	involved	in	responding	to	conditions	of	stress;	the	authentic,	non-tagged	protein	is	detected	in	highly	purified	mitochondria	in	high-throughput	studies	[Source:SGD;Acc:S000002477]
#INFO:	BIOGRID	NEIGHBOUR:	RPL24A	Ribosomal	protein	L30	of	the	large	(60S)	ribosomal	subunit,	nearly	identical	to	Rpl24Bp	and	has	similarity	to	rat	L24	ribosomal	protein;	not	essential	for	translation	but	may	be	required	for	normal	translation	rate	[Source:SGD;Acc:S000002999]
#INFO:	BIOGRID	NEIGHBOUR:	NAP1	Protein	that	interacts	with	mitotic	cyclin	Clb2p;	required	for	the	regulation	of	microtubule	dynamics	during	mitosis;	controls	bud	morphogenesis;	involved	in	the	transport	of	H2A	and	H2B	histones	to	the	nucleus;	phosphorylated	by	CK2	[Source:SGD;Acc:S000001756]
#INFO:	BIOGRID	NEIGHBOUR:	NIP7	Nucleolar	protein	required	for	60S	ribosome	subunit	biogenesis,	constituent	of	66S	pre-ribosomal	particles;	physically	interacts	with	Nop8p	and	the	exosome	subunit	Rrp43p	[Source:SGD;Acc:S000006132]
#INFO:	BIOGRID	NEIGHBOUR:	SLA1	Cytoskeletal	protein	binding	protein	required	for	assembly	of	the	cortical	actin	cytoskeleton;	interacts	with	proteins	regulating	actin	dynamics	and	proteins	required	for	endocytosis;	found	in	the	nucleus	and	cell	cortex;	has	3	SH3	domains	[Source:SGD;Acc:S000000103]
#INFO:	BIOGRID	NEIGHBOUR:	RPS30A	Protein	component	of	the	small	(40S)	ribosomal	subunit;	nearly	identical	to	Rps30Ap	and	has	similarity	to	rat	S30	ribosomal	protein	[Source:SGD;Acc:S000005708]
#INFO:	BIOGRID	NEIGHBOUR:	AGP1	Low-affinity	amino	acid	permease	with	broad	substrate	range,	involved	in	uptake	of	asparagine,	glutamine,	and	other	amino	acids;	expression	is	regulated	by	the	SPS	plasma	membrane	amino	acid	sensor	system	(Ssy1p-Ptr3p-Ssy5p)	[Source:SGD;Acc:S000000530]
#INFO:	BIOGRID	NEIGHBOUR:	SNM1	Subunit	of	RNase	MRP,	which	cleaves	pre-rRNA	and	has	a	role	in	cell	cycle-regulated	degradation	of	daughter	cell-specific	mRNAs;	binds	to	the	NME1	RNA	subunit	of	RNase	MRP	[Source:SGD;Acc:S000002886]
#INFO:	BIOGRID	NEIGHBOUR:	SOD2	Mitochondrial	manganese	superoxide	dismutase,	protects	cells	against	oxygen	toxicity;	phosphorylated	[Source:SGD;Acc:S000001050]
#INFO:	BIOGRID	NEIGHBOUR:	SRP102	Signal	recognition	particle	(SRP)	receptor	beta	subunit;	involved	in	SRP-dependent	protein	targeting;	anchors	the	alpha	subunit,	Srp101p	to	the	ER	membrane	[Source:SGD;Acc:S000001637]
#INFO:	BIOGRID	NEIGHBOUR:	COS8	Nuclear	membrane	protein,	member	of	the	DUP380	subfamily	of	conserved,	often	subtelomerically-encoded	proteins;	regulation	suggests	a	potential	role	in	the	unfolded	protein	response	[Source:SGD;Acc:S000001040]
#INFO:	BIOGRID	NEIGHBOUR:	RPS21A	Protein	component	of	the	small	(40S)	ribosomal	subunit;	nearly	identical	to	Rps21Bp	and	has	similarity	to	rat	S21	ribosomal	protein	[Source:SGD;Acc:S000001765]
#INFO:	BIOGRID	NEIGHBOUR:	RPS23A	Ribosomal	protein	28	(rp28)	of	the	small	(40S)	ribosomal	subunit,	required	for	translational	accuracy;	nearly	identical	to	Rps23Bp	and	similar	to	E.	coli	S12	and	rat	S23	ribosomal	proteins;	deletion	of	both	RPS23A	and	RPS23B	is	lethal	[Source:SGD;Acc:S000003350]
#INFO:	BIOGRID	NEIGHBOUR:	RPP0	Conserved	ribosomal	protein	P0	of	the	ribosomal	stalk,	which	is	involved	in	interaction	between	translational	elongation	factors	and	the	ribosome;	similar	to	rat	P0,	human	P0,	and	E.	coli	L10e;	phosphorylated	on	serine	302	[Source:SGD;Acc:S000004332]
#INFO:	BIOGRID	NEIGHBOUR:	GON7	Component	of	the	EKC/KEOPS	protein	complex	with	Kae1p,	Cgi121p,	Pcc1p,	and	Bud32p;	EKC/KEOPS	complex	is	required	for	t6A	tRNA	modification	and	may	have	roles	in	telomere	maintenance	and	transcription;	implicated	in	osmotic	stress	response	[Source:SGD;Acc:S000003720]
#INFO:	BIOGRID	NEIGHBOUR:	PKH3	Protein	kinase	with	similarity	to	mammalian	phosphoinositide-dependent	kinase	1	(PDK1)	and	yeast	Pkh1p	and	Pkh2p,	two	redundant	upstream	activators	of	Pkc1p;	identified	as	a	multicopy	suppressor	of	a	pkh1	pkh2	double	mutant	[Source:SGD;Acc:S000002874]
#INFO:	BIOGRID	NEIGHBOUR:	SMY1	Protein	that	interacts	with	Myo2p,	proposed	to	be	involved	in	exocytosis;	N-terminal	domain	is	related	to	the	motor	domain	of	kinesins	[Source:SGD;Acc:S000001562]
#INFO:	BIOGRID	NEIGHBOUR:	AI4	Endonuclease	I-SceII,	encoded	by	a	mobile	group	I	intron	within	the	mitochondrial	COX1	gene;	intron	is	normally	spliced	by	the	BI4p	maturase	but	AI4p	can	mutate	to	acquire	the	same	maturase	activity	[Source:SGD;Acc:S000007264]
#INFO:	BIOGRID	NEIGHBOUR:	COX15	Protein	required	for	the	hydroxylation	of	heme	O	to	form	heme	A,	which	is	an	essential	prosthetic	group	for	cytochrome	c	oxidase	[Source:SGD;Acc:S000000943]
#INFO:	BIOGRID	NEIGHBOUR:	PRE4	Beta	7	subunit	of	the	20S	proteasome	[Source:SGD;Acc:S000001946]
#INFO:	BIOGRID	NEIGHBOUR:	ATG2	Peripheral	membrane	protein	required	for	vesicle	formation	during	autophagy,	pexophagy,	and	the	cytoplasm-to-vaucole	targeting	(Cvt)	pathway;	involved	in	Atg9p	cycling	between	the	phagophore	assembly	site	and	mitochondria	[Source:SGD;Acc:S000005186]
#INFO:	BIOGRID	NEIGHBOUR:	HSP82	Hsp90	chaperone	required	for	pheromone	signaling	and	negative	regulation	of	Hsf1p;	docks	with	Tom70p	for	mitochondrial	preprotein	delivery;	promotes	telomerase	DNA	binding	and	nucleotide	addition;	interacts	with	Cns1p,	Cpr6p,	Cpr7p,	Sti1p	[Source:SGD;Acc:S000006161]
#INFO:	BIOGRID	NEIGHBOUR:	MDJ1	Co-chaperone	that	stimulates	the	ATPase	activity	of	the	HSP70	protein	Ssc1p;	involved	in	protein	folding/refolding	in	the	mitochodrial	matrix;	required	for	proteolysis	of	misfolded	proteins;	member	of	the	HSP40	(DnaJ)	family	of	chaperones	[Source:SGD;Acc:S000001878]
#INFO:	BIOGRID	NEIGHBOUR:	SFC1	Mitochondrial	succinate-fumarate	transporter,	transports	succinate	into	and	fumarate	out	of	the	mitochondrion;	required	for	ethanol	and	acetate	utilization	[Source:SGD;Acc:S000003856]
#INFO:	BIOGRID	NEIGHBOUR:	HUG1	Protein	involved	in	the	Mec1p-mediated	checkpoint	pathway	that	responds	to	DNA	damage	or	replication	arrest,	transcription	is	induced	by	DNA	damage	[Source:SGD;Acc:S000007472]
#INFO:	BIOGRID	NEIGHBOUR:	RPL18B	Protein	component	of	the	large	(60S)	ribosomal	subunit,	identical	to	Rpl18Bp	and	has	similarity	to	rat	L18	ribosomal	protein;	intron	of	RPL18A	pre-mRNA	forms	stem-loop	structures	that	are	a	target	for	Rnt1p	cleavage	leading	to	degradation	[Source:SGD;Acc:S000005480]
#INFO:	BIOGRID	NEIGHBOUR:	ADY2	Acetate	transporter	required	for	normal	sporulation;	phosphorylated	in	mitochondria	[Source:SGD;Acc:S000000603]
#INFO:	BIOGRID	NEIGHBOUR:	RPS7A	Protein	component	of	the	small	(40S)	ribosomal	subunit,	nearly	identical	to	Rps7Bp;	interacts	with	Kti11p;	deletion	causes	hypersensitivity	to	zymocin;	has	similarity	to	rat	S7	and	Xenopus	S8	ribosomal	proteins	[Source:SGD;Acc:S000005622]
#INFO:	BIOGRID	NEIGHBOUR:	RPL2A	Protein	component	of	the	large	(60S)	ribosomal	subunit,	identical	to	Rpl2Bp	and	has	similarity	to	E.	coli	L2	and	rat	L8	ribosomal	proteins	[Source:SGD;Acc:S000002104]
#INFO:	BIOGRID	NEIGHBOUR:	SHE2	RNA-binding	protein	that	binds	specific	mRNAs	and	interacts	with	She3p;	part	of	the	mRNA	localization	machinery	that	restricts	accumulation	of	certain	proteins	to	the	bud	[Source:SGD;Acc:S000001613]
#INFO:	BIOGRID	NEIGHBOUR:	GOT1	Homodimeric	protein	that	is	packaged	into	COPII	vesicles	and	cycles	between	the	ER	and	Golgi;	involved	in	secretory	transport	but	not	directly	required	for	aspects	of	transport	assayed	in	vitro;	may	influence	membrane	composition	[Source:SGD;Acc:S000004906]
#INFO:	BIOGRID	NEIGHBOUR:	RNR1	Major	isoform	of	the	large	subunit	of	ribonucleotide-diphosphate	reductase;	the	RNR	complex	catalyzes	rate-limiting	step	in	dNTP	synthesis,	regulated	by	DNA	replication	and	DNA	damage	checkpoint	pathways	via	localization	of	small	subunits	[Source:SGD;Acc:S000000872]
#INFO:	BIOGRID	NEIGHBOUR:	RPS11A	Protein	component	of	the	small	(40S)	ribosomal	subunit;	identical	to	Rps11Bp	and	has	similarity	to	E.	coli	S17	and	rat	S11	ribosomal	proteins	[Source:SGD;Acc:S000002432]
#INFO:	BIOGRID	NEIGHBOUR:	OST6	Subunit	of	the	oligosaccharyltransferase	complex	of	the	ER	lumen,	which	catalyzes	asparagine-linked	glycosylation	of	newly	synthesized	proteins;	similar	to	and	partially	functionally	redundant	with	Ost3p	[Source:SGD;Acc:S000004481]
#INFO:	BIOGRID	NEIGHBOUR:	DIG2	MAP	kinase-responsive	inhibitor	of	the	Ste12p	transcription	factor,	involved	in	the	regulation	of	mating-specific	genes	and	the	invasive	growth	pathway;	related	regulators	Dig1p	and	Dig2p	bind	to	Ste12p	[Source:SGD;Acc:S000002888]
#INFO:	BIOGRID	NEIGHBOUR:	RPL36A	N-terminally	acetylated	protein	component	of	the	large	(60S)	ribosomal	subunit,	nearly	identical	to	Rpl36Bp	and	has	similarity	to	rat	L36	ribosomal	protein;	binds	to	5.8	S	rRNA	[Source:SGD;Acc:S000004807]
#INFO:	BIOGRID	NEIGHBOUR:	RPS5	Protein	component	of	the	small	(40S)	ribosomal	subunit,	the	least	basic	of	the	non-acidic	ribosomal	proteins;	phosphorylated	in	vivo;	essential	for	viability;	has	similarity	to	E.	coli	S7	and	rat	S5	ribosomal	proteins	[Source:SGD;Acc:S000003884]
#INFO:	BIOGRID	NEIGHBOUR:	RPL6B	Protein	component	of	the	large	(60S)	ribosomal	subunit,	has	similarity	to	Rpl6Ap	and	to	rat	L6	ribosomal	protein;	binds	to	5.8S	rRNA	[Source:SGD;Acc:S000004440]
#INFO:	BIOGRID	NEIGHBOUR:	TPO4	Polyamine	transport	protein,	recognizes	spermine,	putrescine,	and	spermidine;	localizes	to	the	plasma	membrane;	member	of	the	major	facilitator	superfamily	[Source:SGD;Acc:S000005799]
#INFO:	BIOGRID	NEIGHBOUR:	PIS1	Phosphatidylinositol	synthase,	required	for	biosynthesis	of	phosphatidylinositol,	which	is	a	precursor	for	polyphosphoinositides,	sphingolipids,	and	glycolipid	anchors	for	some	of	the	plasma	membrane	proteins	[Source:SGD;Acc:S000006317]
#INFO:	BIOGRID	NEIGHBOUR:	PAT1	Topoisomerase	II-associated	deadenylation-dependent	mRNA-decapping	factor;	also	required	for	faithful	chromosome	transmission,	maintenance	of	rDNA	locus	stability,	and	protection	of	mRNA	3'-UTRs	from	trimming;	functionally	linked	to	Pab1p	[Source:SGD;Acc:S000000673]
#INFO:	BIOGRID	NEIGHBOUR:	TPK3	cAMP-dependent	protein	kinase	catalytic	subunit;	promotes	vegetative	growth	in	response	to	nutrients	via	the	Ras-cAMP	signaling	pathway;	partially	redundant	with	Tpk1p	and	Tpk2p;	localizes	to	P-bodies	during	stationary	phase	[Source:SGD;Acc:S000001649]
#INFO:	BIOGRID	NEIGHBOUR:	ERG26	C-3	sterol	dehydrogenase,	catalyzes	the	second	of	three	steps	required	to	remove	two	C-4	methyl	groups	from	an	intermediate	in	ergosterol	biosynthesis	[Source:SGD;Acc:S000002969]
#INFO:	BIOGRID	NEIGHBOUR:	ALG7	UDP-N-acetyl-glucosamine-1-P	transferase,	transfers	Glc-Nac-P	from	UDP-GlcNac	to	Dol-P	in	the	ER	in	the	first	step	of	the	dolichol	pathway	of	protein	asparagine-linked	glycosylation;	inhibited	by	tunicamycin	[Source:SGD;Acc:S000000447]
#INFO:	BIOGRID	NEIGHBOUR:	SRP14	Signal	recognition	particle	(SRP)	subunit,	interacts	with	the	RNA	component	of	SRP	to	form	the	Alu	domain,	which	is	the	region	of	SRP	responsible	for	arrest	of	nascent	chain	elongation	during	membrane	targeting;	homolog	of	mammalian	SRP14	[Source:SGD;Acc:S000002250]
#INFO:	BIOGRID	NEIGHBOUR:	LSP1	Primary	component	of	eisosomes,	which	are	large	immobile	patch	structures	at	the	cell	cortex	associated	with	endocytosis,	along	with	Pil1p	and	Sur7p;	null	mutants	show	activation	of	Pkc1p/Ypk1p	stress	resistance	pathways;	member	of	the	BAR	domain	family	[Source:SGD;Acc:S000005925]
#INFO:	BIOGRID	NEIGHBOUR:	DBP2	Essential	ATP-dependent	RNA	helicase	of	the	DEAD-box	protein	family,	involved	in	nonsense-mediated	mRNA	decay	and	rRNA	processing	[Source:SGD;Acc:S000005056]
#INFO:	BIOGRID	NEIGHBOUR:	NCP1	NADP-cytochrome	P450	reductase;	involved	in	ergosterol	biosynthesis;	associated	and	coordinately	regulated	with	Erg11p	[Source:SGD;Acc:S000001084]
#INFO:	BIOGRID	NEIGHBOUR:	COX14	Mitochondrial	membrane	protein,	involved	in	translational	regulation	of	Cox1p	and	assembly	of	cytochrome	c	oxidase	(complex	IV);	associates	with	complex	IV	assembly	intermediates	and	complex	III/complex	IV	supercomplexes	[Source:SGD;Acc:S000004598]
#INFO:	BIOGRID	NEIGHBOUR:	APL4	Gamma-adaptin,	large	subunit	of	the	clathrin-associated	protein	(AP-1)	complex;	binds	clathrin;	involved	in	vesicle	mediated	transport	[Source:SGD;Acc:S000006233]
#INFO:	BIOGRID	NEIGHBOUR:	PRP43	RNA	helicase	in	the	DEAH-box	family,	functions	in	both	RNA	polymerase	I	and	polymerase	II	transcript	metabolism,	involved	in	release	of	the	lariat-intron	from	the	spliceosome	[Source:SGD;Acc:S000003088]
#INFO:	BIOGRID	NEIGHBOUR:	BI2	Mitochondrial	mRNA	maturase	with	a	role	in	splicing,	encoded	by	both	exon	and	intron	sequences	of	partially	processed	COB	mRNA	[Source:SGD;Acc:S000007271]
#INFO:	BIOGRID	NEIGHBOUR:	BRE5	Ubiquitin	protease	cofactor,	forms	deubiquitination	complex	with	Ubp3p	that	coregulates	anterograde	and	retrograde	transport	between	the	endoplasmic	reticulum	and	Golgi	compartments;	null	is	sensitive	to	brefeldin	A	[Source:SGD;Acc:S000005334]
#INFO:	BIOGRID	NEIGHBOUR:	RPL7A	Protein	component	of	the	large	(60S)	ribosomal	subunit,	nearly	identical	to	Rpl7Bp	and	has	similarity	to	E.	coli	L30	and	rat	L7	ribosomal	proteins;	contains	a	conserved	C-terminal	Nucleic	acid	Binding	Domain	(NDB2)	[Source:SGD;Acc:S000003044]
#INFO:	BIOGRID	NEIGHBOUR:	GTT1	ER	associated	glutathione	S-transferase	capable	of	homodimerization;	expression	induced	during	the	diauxic	shift	and	throughout	stationary	phase;	functional	overlap	with	Gtt2p,	Grx1p,	and	Grx2p	[Source:SGD;Acc:S000001477]
#INFO:	BIOGRID	NEIGHBOUR:	FMP33	Putative	protein	of	unknown	function;	the	authentic,	non-tagged	protein	is	detected	in	highly	purified	mitochondria	in	high-throughput	studies	[Source:SGD;Acc:S000003697]
#INFO:	BIOGRID	NEIGHBOUR:	MEP2	Ammonium	permease	involved	in	regulation	of	pseudohyphal	growth;	belongs	to	a	ubiquitous	family	of	cytoplasmic	membrane	proteins	that	transport	only	ammonium	(NH4+);	expression	is	under	the	nitrogen	catabolite	repression	regulation	[Source:SGD;Acc:S000005086]
#INFO:	BIOGRID	NEIGHBOUR:	SEC61	Essential	subunit	of	Sec61	complex	(Sec61p,	Sbh1p,	and	Sss1p);	forms	a	channel	for	SRP-dependent	protein	import	and	retrograde	transport	of	misfolded	proteins	out	of	the	ER;	with	Sec63	complex	allows	SRP-independent	protein	import	into	ER	[Source:SGD;Acc:S000004370]
#INFO:	BIOGRID	NEIGHBOUR:	SMT3	Ubiquitin-like	protein	of	the	SUMO	family,	conjugated	to	lysine	residues	of	target	proteins;	regulates	chromatid	cohesion,	chromosome	segregation,	APC-mediated	proteolysis,	DNA	replication	and	septin	ring	dynamics;	phosphorylated	at	Ser2	[Source:SGD;Acc:S000002918]
#INFO:	BIOGRID	NEIGHBOUR:	NVJ1	Nuclear	envelope	protein,	anchored	to	the	nuclear	inner	membrane,	that	interacts	with	the	vacuolar	membrane	protein	Vac8p	to	promote	formation	of	nucleus-vacuole	junctions	during	piecemeal	microautophagy	of	the	nucleus	(PMN)	[Source:SGD;Acc:S000001238]
#INFO:	BIOGRID	NEIGHBOUR:	HSK3	Essential	subunit	of	the	Dam1	complex	(aka	DASH	complex),	couples	kinetochores	to	the	force	produced	by	MT	depolymerization	thereby	aiding	in	chromosome	segregation;	is	transferred	to	the	kinetochore	prior	to	mitosis	[Source:SGD;Acc:S000028421]
#INFO:	BIOGRID	NEIGHBOUR:	HBS1	GTPase	with	similarity	to	translation	release	factors;	together	with	binding	partner	Dom34p,	facilitates	ribosomal	subunit	dissociation	and	peptidyl-tRNA	release	when	translation	is	stalled;	genetically	implicated	in	mRNA	no-go	decay	[Source:SGD;Acc:S000001792]
#INFO:	BIOGRID	NEIGHBOUR:	EPT1	sn-1,2-diacylglycerol	ethanolamine-	and	cholinephosphotranferase;	not	essential	for	viability	[Source:SGD;Acc:S000001165]
#INFO:	BIOGRID	NEIGHBOUR:	MRP17	Mitochondrial	ribosomal	protein	of	the	small	subunit;	MRP17	exhibits	genetic	interactions	with	PET122,	encoding	a	COX3-specific	translational	activator	[Source:SGD;Acc:S000001486]
#INFO:	BIOGRID	NEIGHBOUR:	QCR8	Subunit	8	of	ubiquinol	cytochrome-c	reductase	complex,	which	is	a	component	of	the	mitochondrial	inner	membrane	electron	transport	chain;	oriented	facing	the	intermembrane	space;	expression	is	regulated	by	Abf1p	and	Cpf1p	[Source:SGD;Acc:S000003702]
#INFO:	BIOGRID	NEIGHBOUR:	OLE1	Delta(9)	fatty	acid	desaturase,	required	for	monounsaturated	fatty	acid	synthesis	and	for	normal	distribution	of	mitochondria	[Source:SGD;Acc:S000003023]
#INFO:	BIOGRID	NEIGHBOUR:	RDH54	DNA-dependent	ATPase,	stimulates	strand	exchange	by	modifying	the	topology	of	double-stranded	DNA;	involved	in	recombinational	repair	of	DNA	double-strand	breaks	during	mitosis	and	meiosis;	proposed	to	be	involved	in	crossover	interference	[Source:SGD;Acc:S000000277]
#INFO:	BIOGRID	NEIGHBOUR:	HTA2	Histone	H2A,	core	histone	protein	required	for	chromatin	assembly	and	chromosome	function;	one	of	two	nearly	identical	(see	also	HTA1)	subtypes;	DNA	damage-dependent	phosphorylation	by	Mec1p	facilitates	DNA	repair;	acetylated	by	Nat4p	[Source:SGD;Acc:S000000099]
#INFO:	BIOGRID	NEIGHBOUR:	TNA1	High	affinity	nicotinic	acid	plasma	membrane	permease,	responsible	for	uptake	of	low	levels	of	nicotinic	acid;	expression	of	the	gene	increases	in	the	absence	of	extracellular	nicotinic	acid	or	para-aminobenzoate	(PABA)	[Source:SGD;Acc:S000003492]
#INFO:	BIOGRID	NEIGHBOUR:	GZF3	GATA	zinc	finger	protein	and	Dal80p	homolog	that	negatively	regulates	nitrogen	catabolic	gene	expression	by	competing	with	Gat1p	for	GATA	site	binding;	function	requires	a	repressive	carbon	source;	dimerizes	with	Dal80p	and	binds	to	Tor1p	[Source:SGD;Acc:S000003646]
#INFO:	BIOGRID	NEIGHBOUR:	MRPL3	Mitochondrial	ribosomal	protein	of	the	large	subunit	[Source:SGD;Acc:S000004626]
#INFO:	BIOGRID	NEIGHBOUR:	URB1	Nucleolar	protein	required	for	the	normal	accumulation	of	25S	and	5.8S	rRNAs,	associated	with	the	27SA2	pre-ribosomal	particle;	proposed	to	be	involved	in	the	biogenesis	of	the	60S	ribosomal	subunit	[Source:SGD;Acc:S000001497]
#INFO:	BIOGRID	NEIGHBOUR:	ATP2	Beta	subunit	of	the	F1	sector	of	mitochondrial	F1F0	ATP	synthase,	which	is	a	large,	evolutionarily	conserved	enzyme	complex	required	for	ATP	synthesis;	phosphorylated	[Source:SGD;Acc:S000003882]
#INFO:	BIOGRID	NEIGHBOUR:	AYT1	Acetyltransferase;	catalyzes	trichothecene	3-O-acetylation,	suggesting	a	possible	role	in	trichothecene	biosynthesis	[Source:SGD;Acc:S000003986]
#INFO:	BIOGRID	NEIGHBOUR:	COX6	Subunit	VI	of	cytochrome	c	oxidase,	which	is	the	terminal	member	of	the	mitochondrial	inner	membrane	electron	transport	chain;	expression	is	regulated	by	oxygen	levels	[Source:SGD;Acc:S000001093]
#INFO:	BIOGRID	NEIGHBOUR:	DYS1	Deoxyhypusine	synthase,	catalyzes	formation	of	deoxyhypusine,	the	first	step	in	hypusine	biosynthesis;	triggers	posttranslational	hypusination	of	translation	elongation	factor	eIF-5A	and	regulates	its	intracellular	levels;	tetrameric	[Source:SGD;Acc:S000001110]
#INFO:	BIOGRID	NEIGHBOUR:	FOX2	Multifunctional	enzyme	of	the	peroxisomal	fatty	acid	beta-oxidation	pathway;	has	3-hydroxyacyl-CoA	dehydrogenase	and	enoyl-CoA	hydratase	activities	[Source:SGD;Acc:S000001717]
#INFO:	BIOGRID	NEIGHBOUR:	SPG1	Protein	required	for	survival	at	high	temperature	during	stationary	phase;	not	required	for	growth	on	nonfermentable	carbon	sources;	the	authentic,	non-tagged	protein	is	detected	in	highly	purified	mitochondria	in	high-throughput	studies	[Source:SGD;Acc:S000003468]
#INFO:	BIOGRID	NEIGHBOUR:	TIS11	mRNA-binding	protein	expressed	during	iron	starvation;	binds	to	a	sequence	element	in	the	3'-untranslated	regions	of	specific	mRNAs	to	mediate	their	degradation;	involved	in	iron	homeostasis	[Source:SGD;Acc:S000004126]
#INFO:	BIOGRID	NEIGHBOUR:	RIX7	Putative	ATPase	of	the	AAA	family,	required	for	export	of	pre-ribosomal	large	subunits	from	the	nucleus;	distributed	between	the	nucleolus,	nucleoplasm,	and	nuclear	periphery	depending	on	growth	conditions	[Source:SGD;Acc:S000003957]
#INFO:	BIOGRID	NEIGHBOUR:	MDM38	Mitochondrial	protein,	forms	a	complex	with	Mba1p	to	facilitate	recruitment	of	mRNA-specific	translational	activators	to	ribosomes;	roles	in	protein	export	and	K+/H+	exchange;	human	ortholog	Letm1	implicated	in	Wolf-Hirschhorn	syndrome	[Source:SGD;Acc:S000005387]
#INFO:	BIOGRID	NEIGHBOUR:	ERG25	C-4	methyl	sterol	oxidase,	catalyzes	the	first	of	three	steps	required	to	remove	two	C-4	methyl	groups	from	an	intermediate	in	ergosterol	biosynthesis;	mutants	accumulate	the	sterol	intermediate	4,4-dimethylzymosterol	[Source:SGD;Acc:S000003292]
#INFO:	BIOGRID	NEIGHBOUR:	YPR010C-A	Putative	protein	of	unknown	function;	conserved	among	Saccharomyces	sensu	stricto	species	[Source:SGD;Acc:S000122558]
#INFO:	BIOGRID	NEIGHBOUR:	NOP12	Nucleolar	protein	involved	in	pre-25S	rRNA	processing	and	biogenesis	of	large	60S	ribosomal	subunit;	contains	an	RNA	recognition	motif	(RRM);	binds	to	Ebp2;	similar	to	Nop13p	and	Nsr1p	[Source:SGD;Acc:S000005401]
#INFO:	BIOGRID	NEIGHBOUR:	ATP5	Subunit	5	of	the	stator	stalk	of	mitochondrial	F1F0	ATP	synthase,	which	is	an	evolutionarily	conserved	enzyme	complex	required	for	ATP	synthesis;	homologous	to	bovine	subunit	OSCP	(oligomycin	sensitivity-conferring	protein);	phosphorylated	[Source:SGD;Acc:S000002706]
#INFO:	BIOGRID	NEIGHBOUR:	RAI1	Nuclear	protein	with	decapping	endonuclease	activity	targeted	toward	mRNAs	with	unmethylated	7-methylguanosine	cap	structures;	binds	to	and	stabilizes	the	exoribonuclease	Rat1p;	required	for	pre-rRNA	processing;	homologous	to	human	DOM3Z	[Source:SGD;Acc:S000003215]
#INFO:	BIOGRID	NEIGHBOUR:	RPS20	Protein	component	of	the	small	(40S)	ribosomal	subunit;	overproduction	suppresses	mutations	affecting	RNA	polymerase	III-dependent	transcription;	has	similarity	to	E.	coli	S10	and	rat	S20	ribosomal	proteins	[Source:SGD;Acc:S000001007]
#INFO:	BIOGRID	NEIGHBOUR:	NOP56	Essential	evolutionarily-conserved	nucleolar	protein	component	of	the	box	C/D	snoRNP	complexes	that	direct	2'-O-methylation	of	pre-rRNA	during	its	maturation;	overexpression	causes	spindle	orientation	defects	[Source:SGD;Acc:S000004187]
#INFO:	BIOGRID	NEIGHBOUR:	RTN2	Protein	of	unknown	function;	has	similarity	to	mammalian	reticulon	proteins;	member	of	the	RTNLA	(reticulon-like	A)	subfamily	[Source:SGD;Acc:S000002363]
#INFO:	BIOGRID	NEIGHBOUR:	PPZ1	Serine/threonine	protein	phosphatase	Z,	isoform	of	Ppz2p;	involved	in	regulation	of	potassium	transport,	which	affects	osmotic	stability,	cell	cycle	progression,	and	halotolerance	[Source:SGD;Acc:S000004478]
#INFO:	BIOGRID	NEIGHBOUR:	CAT2	Carnitine	acetyl-CoA	transferase	present	in	both	mitochondria	and	peroxisomes,	transfers	activated	acetyl	groups	to	carnitine	to	form	acetylcarnitine	which	can	be	shuttled	across	membranes	[Source:SGD;Acc:S000004506]
#INFO:	BIOGRID	NEIGHBOUR:	RSM23	Mitochondrial	ribosomal	protein	of	the	small	subunit,	has	similarity	to	mammalian	apoptosis	mediator	proteins;	null	mutation	prevents	induction	of	apoptosis	by	overproduction	of	metacaspase	Mca1p	[Source:SGD;Acc:S000003097]
#INFO:	BIOGRID	NEIGHBOUR:	PET9	Major	ADP/ATP	carrier	of	the	mitochondrial	inner	membrane,	exchanges	cytosolic	ADP	for	mitochondrially	synthesized	ATP;	also	imports	heme	and	ATP;	phosphorylated;	required	for	viability	in	many	lab	strains	that	carry	a	sal1	mutation	[Source:SGD;Acc:S000000126]
#INFO:	BIOGRID	NEIGHBOUR:	YCK1	Palmitoylated	plasma	membrane-bound	casein	kinase	I	isoform;	shares	redundant	functions	with	Yck2p	in	morphogenesis,	proper	septin	assembly,	endocytic	trafficking;	provides	an	essential	function	overlapping	with	that	of	Yck2p	[Source:SGD;Acc:S000001177]
#INFO:	BIOGRID	NEIGHBOUR:	STE50	Protein	involved	in	mating	response,	invasive/filamentous	growth,	and	osmotolerance,	acts	as	an	adaptor	that	links	G	protein-associated	Cdc42p-Ste20p	complex	to	the	effector	Ste11p	to	modulate	signal	transduction	[Source:SGD;Acc:S000000537]
#INFO:	BIOGRID	NEIGHBOUR:	KES1	Member	of	the	oxysterol	binding	protein	family,	which	includes	seven	yeast	homologs;	involved	in	negative	regulation	of	Sec14p-dependent	Golgi	complex	secretory	functions,	peripheral	membrane	protein	that	localizes	to	the	Golgi	complex	[Source:SGD;Acc:S000006066]
#INFO:	BIOGRID	NEIGHBOUR:	RPT3	One	of	six	ATPases	of	the	19S	regulatory	particle	of	the	26S	proteasome	involved	in	the	degradation	of	ubiquitinated	substrates;	substrate	of	N-acetyltransferase	B	[Source:SGD;Acc:S000002802]
#INFO:	BIOGRID	NEIGHBOUR:	YLH47	Mitochondrial	inner	membrane	protein	exposed	to	the	mitochondrial	matrix,	associates	with	mitochondrial	ribosomes,	NOT	required	for	respiratory	growth;	homolog	of	human	Letm1,	a	protein	implicated	in	Wolf-Hirschhorn	syndrome	[Source:SGD;Acc:S000006329]
#INFO:	BIOGRID	NEIGHBOUR:	RPS1A	Ribosomal	protein	10	(rp10)	of	the	small	(40S)	subunit;	nearly	identical	to	Rps1Bp	and	has	similarity	to	rat	S3a	ribosomal	protein	[Source:SGD;Acc:S000004433]
#INFO:	BIOGRID	NEIGHBOUR:	NOC3	Protein	that	forms	a	nuclear	complex	with	Noc2p	that	binds	to	66S	ribosomal	precursors	to	mediate	their	intranuclear	transport;	also	binds	to	chromatin	to	promote	the	association	of	DNA	replication	factors	and	replication	initiation	[Source:SGD;Acc:S000003992]
#INFO:	BIOGRID	NEIGHBOUR:	YHB1	Nitric	oxide	oxidoreductase,	flavohemoglobin	involved	in	nitric	oxide	detoxification;	plays	a	role	in	the	oxidative	and	nitrosative	stress	responses	[Source:SGD;Acc:S000003466]
#INFO:	BIOGRID	NEIGHBOUR:	TOM5	Component	of	the	TOM	(translocase	of	outer	membrane)	complex	responsible	for	recognition	and	initial	import	of	all	mitochondrially	directed	proteins;	involved	in	transfer	of	precursors	from	the	Tom70p	and	Tom20p	receptors	to	the	Tom40p	pore	[Source:SGD;Acc:S000006433]
#INFO:	BIOGRID	NEIGHBOUR:	ANP1	Subunit	of	the	alpha-1,6	mannosyltransferase	complex;	type	II	membrane	protein;	has	a	role	in	retention	of	glycosyltransferases	in	the	Golgi;	involved	in	osmotic	sensitivity	and	resistance	to	aminonitrophenyl	propanediol	[Source:SGD;Acc:S000000762]
#INFO:	BIOGRID	NEIGHBOUR:	SRN2	Component	of	the	ESCRT-I	complex,	which	is	involved	in	ubiquitin-dependent	sorting	of	proteins	into	the	endosome;	suppressor	of	rna1-1	mutation;	may	be	involved	in	RNA	export	from	nucleus	[Source:SGD;Acc:S000004109]
#INFO:	BIOGRID	NEIGHBOUR:	HMO1	Chromatin	associated	high	mobility	group	(HMG)	family	member	involved	in	genome	maintenance;	rDNA-binding	component	of	the	Pol	I	transcription	system;	associates	with	a	5'-3'	DNA	helicase	and	Fpr1p,	a	prolyl	isomerase	[Source:SGD;Acc:S000002581]
#INFO:	BIOGRID	NEIGHBOUR:	YMC1	Mitochondrial	protein,	putative	inner	membrane	transporter	with	a	role	in	oleate	metabolism	and	glutamate	biosynthesis;	member	of	the	mitochondrial	carrier	(MCF)	family;	has	similarity	with	Ymc2p	[Source:SGD;Acc:S000006262]
#INFO:	BIOGRID	NEIGHBOUR:	ADK1	Adenylate	kinase,	required	for	purine	metabolism;	localized	to	the	cytoplasm	and	the	mitochondria;	lacks	cleavable	signal	sequence	[Source:SGD;Acc:S000002634]
#INFO:	BIOGRID	NEIGHBOUR:	ERG4	C-24(28)	sterol	reductase,	catalyzes	the	final	step	in	ergosterol	biosynthesis;	mutants	are	viable,	but	lack	ergosterol	[Source:SGD;Acc:S000002980]
#INFO:	BIOGRID	NEIGHBOUR:	RVB2	Essential	protein	involved	in	transcription	regulation;	component	of	chromatin	remodeling	complexes;	required	for	assembly	and	function	of	the	INO80	complex;	also	referred	to	as	reptin;	member	of	the	RUVB-like	protein	family	[Source:SGD;Acc:S000006156]
#INFO:	BIOGRID	NEIGHBOUR:	BEM2	Rho	GTPase	activating	protein	(RhoGAP)	involved	in	the	control	of	cytoskeleton	organization	and	cellular	morphogenesis;	required	for	bud	emergence	[Source:SGD;Acc:S000000957]
#INFO:	BIOGRID	NEIGHBOUR:	PAP2	Non-canonical	poly(A)	polymerase,	involved	in	nuclear	RNA	degradation	as	a	component	of	the	TRAMP	complex;	catalyzes	polyadenylation	of	hypomodified	tRNAs,	and	snoRNA	and	rRNA	precursors;	overlapping	but	non-redundant	functions	with	Trf5p	[Source:SGD;Acc:S000005475]
#INFO:	BIOGRID	NEIGHBOUR:	RPL27B	Protein	component	of	the	large	(60S)	ribosomal	subunit,	nearly	identical	to	Rpl27Ap	and	has	similarity	to	rat	L27	ribosomal	protein	[Source:SGD;Acc:S000002879]
#INFO:	BIOGRID	NEIGHBOUR:	MEI5	Meiosis	specific	protein	involved	in	DMC1-dependent	meiotic	recombination,	forms	heterodimer	with	Sae3p;	proposed	to	be	an	assembly	factor	for	Dmc1p	[Source:SGD;Acc:S000006042]
#INFO:	BIOGRID	NEIGHBOUR:	RPS14A	Ribosomal	protein	59	of	the	small	subunit,	required	for	ribosome	assembly	and	20S	pre-rRNA	processing;	mutations	confer	cryptopleurine	resistance;	nearly	identical	to	Rps14Bp	and	similar	to	E.	coli	S11	and	rat	S14	ribosomal	proteins	[Source:SGD;Acc:S000000627]
#INFO:	BIOGRID	NEIGHBOUR:	ULP2	Peptidase	that	deconjugates	Smt3/SUMO-1	peptides	from	proteins,	plays	a	role	in	chromosome	cohesion	at	centromeric	regions	and	recovery	from	checkpoint	arrest	induced	by	DNA	damage	or	DNA	replication	defects;	potential	Cdc28p	substrate	[Source:SGD;Acc:S000001293]
#INFO:	BIOGRID	NEIGHBOUR:	FPR4	Peptidyl-prolyl	cis-trans	isomerase	(PPIase)	(proline	isomerase)	localized	to	the	nucleus;	catalyzes	isomerization	of	proline	residues	in	histones	H3	and	H4,	which	affects	lysine	methylation	of	those	histones	[Source:SGD;Acc:S000004441]
#INFO:	BIOGRID	NEIGHBOUR:	MRP4	Mitochondrial	ribosomal	protein	of	the	small	subunit	[Source:SGD;Acc:S000000996]
#INFO:	BIOGRID	NEIGHBOUR:	RLP7	Nucleolar	protein	with	similarity	to	large	ribosomal	subunit	L7	proteins;	constituent	of	66S	pre-ribosomal	particles;	plays	an	essential	role	in	processing	of	precursors	to	the	large	ribosomal	subunit	RNAs	[Source:SGD;Acc:S000004947]
#INFO:	BIOGRID	NEIGHBOUR:	OSH6	Member	of	an	oxysterol-binding	protein	family	with	overlapping,	redundant	functions	in	sterol	metabolism	and	which	collectively	perform	a	function	essential	for	viability;	GFP-fusion	protein	localizes	to	the	cell	periphery	[Source:SGD;Acc:S000001711]
#INFO:	BIOGRID	NEIGHBOUR:	CLU1	eIF3	component	of	unknown	function;	deletion	causes	defects	in	mitochondrial	organization	but	not	in	growth	or	translation	initiation,	can	rescue	cytokinesis	and	mitochondrial	organization	defects	of	the	Dictyostelium	cluA-	mutant	[Source:SGD;Acc:S000004614]
#INFO:	BIOGRID	NEIGHBOUR:	DDR48	DNA	damage-responsive	protein,	expression	is	increased	in	response	to	heat-shock	stress	or	treatments	that	produce	DNA	lesions;	contains	multiple	repeats	of	the	amino	acid	sequence	NNNDSYGS	[Source:SGD;Acc:S000004784]
#INFO:	BIOGRID	NEIGHBOUR:	YBR255C-A	Putative	protein	of	unknown	function;	may	interact	with	respiratory	chain	complexes	III	(ubiquinol-cytochrome	c	reductase)	or	IV	(cytochrome	c	oxidase);	identified	by	sequence	comparison	with	hemiascomycetous	yeast	species	[Source:SGD;Acc:S000007649]
#INFO:	BIOGRID	NEIGHBOUR:	MCR1	Mitochondrial	NADH-cytochrome	b5	reductase,	involved	in	ergosterol	biosynthesis	[Source:SGD;Acc:S000001633]
#INFO:	BIOGRID	NEIGHBOUR:	TDH2	Glyceraldehyde-3-phosphate	dehydrogenase,	isozyme	2,	involved	in	glycolysis	and	gluconeogenesis;	tetramer	that	catalyzes	the	reaction	of	glyceraldehyde-3-phosphate	to	1,3	bis-phosphoglycerate;	detected	in	the	cytoplasm	and	cell	wall	[Source:SGD;Acc:S000003769]
#INFO:	BIOGRID	NEIGHBOUR:	MRPS18	Mitochondrial	ribosomal	protein	of	the	small	subunit;	essential	for	viability,	unlike	most	other	mitoribosomal	proteins	[Source:SGD;Acc:S000005250]
#INFO:	BIOGRID	NEIGHBOUR:	PUF4	Member	of	the	PUF	protein	family,	which	is	defined	by	the	presence	of	Pumilio	homology	domains	that	confer	RNA	binding	activity;	preferentially	binds	mRNAs	encoding	nucleolar	ribosomal	RNA-processing	factors	[Source:SGD;Acc:S000002982]
#INFO:	BIOGRID	NEIGHBOUR:	NUG1	GTPase	that	associates	with	nuclear	60S	pre-ribosomes,	required	for	export	of	60S	ribosomal	subunits	from	the	nucleus	[Source:SGD;Acc:S000000808]
#INFO:	BIOGRID	NEIGHBOUR:	AIM46	Putative	protein	of	unknown	function;	the	authentic,	non-tagged	protein	is	detected	in	highly	purified	mitochondria	in	high-throughput	studies;	null	mutant	displays	elevated	frequency	of	mitochondrial	genome	loss	[Source:SGD;Acc:S000001242]
#INFO:	BIOGRID	NEIGHBOUR:	AI5_ALPHA	Endonuclease	I-SceIV,	involved	in	intron	mobility;	encoded	by	a	mobile	group	I	intron	within	the	mitochondrial	COX1	gene	[Source:SGD;Acc:S000007265]
#INFO:	BIOGRID	NEIGHBOUR:	MGE1	Mitochondrial	matrix	cochaperone,	acts	as	a	nucleotide	release	factor	for	Ssc1p	in	protein	translocation	and	folding;	also	acts	as	cochaperone	for	Ssq1p	in	folding	of	Fe-S	cluster	proteins;	homolog	of	E.	coli	GrpE	[Source:SGD;Acc:S000005758]
#INFO:	BIOGRID	NEIGHBOUR:	HXT1	Low-affinity	glucose	transporter	of	the	major	facilitator	superfamily,	expression	is	induced	by	Hxk2p	in	the	presence	of	glucose	and	repressed	by	Rgt1p	when	glucose	is	limiting	[Source:SGD;Acc:S000001136]
#INFO:	BIOGRID	NEIGHBOUR:	OAC1	Mitochondrial	inner	membrane	transporter,	transports	oxaloacetate,	sulfate,	thiosulfate,	and	isopropylmalate;	member	of	the	mitochondrial	carrier	family	[Source:SGD;Acc:S000001603]
#INFO:	BIOGRID	NEIGHBOUR:	MDH1	Mitochondrial	malate	dehydrogenase,	catalyzes	interconversion	of	malate	and	oxaloacetate;	involved	in	the	tricarboxylic	acid	(TCA)	cycle;	phosphorylated	[Source:SGD;Acc:S000001568]
#INFO:	BIOGRID	NEIGHBOUR:	KGD1	Component	of	the	mitochondrial	alpha-ketoglutarate	dehydrogenase	complex,	which	catalyzes	a	key	step	in	the	tricarboxylic	acid	(TCA)	cycle,	the	oxidative	decarboxylation	of	alpha-ketoglutarate	to	form	succinyl-CoA	[Source:SGD;Acc:S000001387]
#INFO:	BIOGRID	NEIGHBOUR:	RPL1B	N-terminally	acetylated	protein	component	of	the	large	(60S)	ribosomal	subunit,	nearly	identical	to	Rpl1Bp	and	has	similarity	to	E.	coli	L1	and	rat	L10a	ribosomal	proteins;	rpl1a	rpl1b	double	null	mutation	is	lethal	[Source:SGD;Acc:S000006141]
#INFO:	BIOGRID	NEIGHBOUR:	FRT1	Tail-anchored	ER	membrane	protein	that	is	a	substrate	of	the	phosphatase	calcineurin;	interacts	with	homolog	Frt2p;	promotes	cell	growth	in	stress	conditions,	possibly	via	a	role	in	posttranslational	translocation	[Source:SGD;Acc:S000005851]
#INFO:	BIOGRID	NEIGHBOUR:	LYS12	Homo-isocitrate	dehydrogenase,	an	NAD-linked	mitochondrial	enzyme	required	for	the	fourth	step	in	the	biosynthesis	of	lysine,	in	which	homo-isocitrate	is	oxidatively	decarboxylated	to	alpha-ketoadipate	[Source:SGD;Acc:S000001356]
#INFO:	BIOGRID	NEIGHBOUR:	CYT2	Cytochrome	c1	heme	lyase,	involved	in	maturation	of	cytochrome	c1,	which	is	a	subunit	of	the	mitochondrial	ubiquinol-cytochrome-c	reductase;	links	heme	covalently	to	apocytochrome	c1	[Source:SGD;Acc:S000001570]
#INFO:	BIOGRID	NEIGHBOUR:	RPL5	Protein	component	of	the	large	(60S)	ribosomal	subunit	with	similarity	to	E.	coli	L18	and	rat	L5	ribosomal	proteins;	binds	5S	rRNA	and	is	required	for	60S	subunit	assembly	[Source:SGD;Acc:S000006052]
#INFO:	BIOGRID	NEIGHBOUR:	GUP1	Plasma	membrane	protein	involved	in	remodeling	GPI	anchors;	member	of	the	MBOAT	family	of	putative	membrane-bound	O-acyltransferases;	proposed	to	be	involved	in	glycerol	transport	[Source:SGD;Acc:S000003052]
#INFO:	BIOGRID	NEIGHBOUR:	AI3	Endonuclease	I-SceIII,	encoded	by	a	mobile	group	I	intron	within	the	mitochondrial	COX1	gene	[Source:SGD;Acc:S000007263]
#INFO:	BIOGRID	NEIGHBOUR:	DAL5	Allantoate	permease;	ureidosuccinate	permease;	also	transports	dipeptides,	though	with	lower	affinity	than	for	allantoate	and	ureidosuccinate;	expression	is	constitutive	but	sensitive	to	nitrogen	catabolite	repression	[Source:SGD;Acc:S000003913]
#INFO:	BIOGRID	NEIGHBOUR:	ATP7	Subunit	d	of	the	stator	stalk	of	mitochondrial	F1F0	ATP	synthase,	which	is	a	large,	evolutionarily	conserved	enzyme	complex	required	for	ATP	synthesis	[Source:SGD;Acc:S000001499]
#INFO:	BIOGRID	NEIGHBOUR:	ATG15	Lipase	required	for	intravacuolar	lysis	of	autophagic	bodies	and	Cvt	bodies;	targeted	to	intravacuolar	vesicles	during	autophagy	via	the	multivesicular	body	(MVB)	pathway	[Source:SGD;Acc:S000000664]
#INFO:	BIOGRID	NEIGHBOUR:	SMK1	Middle	sporulation-specific	mitogen-activated	protein	kinase	(MAPK)	required	for	production	of	the	outer	spore	wall	layers;	negatively	regulates	activity	of	the	glucan	synthase	subunit	Gsc2p	[Source:SGD;Acc:S000006258]
#INFO:	BIOGRID	NEIGHBOUR:	GCV3	H	subunit	of	the	mitochondrial	glycine	decarboxylase	complex,	required	for	the	catabolism	of	glycine	to	5,10-methylene-THF;	also	required	for	all	protein	lipoylation;	expression	is	regulated	by	levels	of	5,10-methylene-THF	[Source:SGD;Acc:S000000042]
#INFO:	BIOGRID	NEIGHBOUR:	MRPL13	Mitochondrial	ribosomal	protein	of	the	large	subunit,	not	essential	for	mitochondrial	translation	[Source:SGD;Acc:S000001714]
#INFO:	BIOGRID	NEIGHBOUR:	LSM5	Lsm	(Like	Sm)	protein;	part	of	heteroheptameric	complexes	(Lsm2p-7p	and	either	Lsm1p	or	8p):	cytoplasmic	Lsm1p	complex	involved	in	mRNA	decay;	nuclear	Lsm8p	complex	part	of	U6	snRNP	and	possibly	involved	in	processing	tRNA,	snoRNA,	and	rRNA	[Source:SGD;Acc:S000000948]
#INFO:	BIOGRID	NEIGHBOUR:	ERG9	Farnesyl-diphosphate	farnesyl	transferase	(squalene	synthase),	joins	two	farnesyl	pyrophosphate	moieties	to	form	squalene	in	the	sterol	biosynthesis	pathway	[Source:SGD;Acc:S000001233]
#INFO:	BIOGRID	NEIGHBOUR:	HNM1	Choline/ethanolamine	transporter;	involved	in	the	uptake	of	nitrogen	mustard	and	the	uptake	of	glycine	betaine	during	hypersaline	stress;	co-regulated	with	phospholipid	biosynthetic	genes	and	negatively	regulated	by	choline	and	myo-inositol	[Source:SGD;Acc:S000003045]
#INFO:	BIOGRID	NEIGHBOUR:	RRP1	Essential	evolutionarily	conserved	nucleolar	protein	necessary	for	biogenesis	of	60S	ribosomal	subunits	and	processing	of	pre-rRNAs	to	mature	rRNAs,	associated	with	several	distinct	66S	pre-ribosomal	particles	[Source:SGD;Acc:S000002494]
#INFO:	BIOGRID	NEIGHBOUR:	TAF1	TFIID	subunit	(145	kDa),	involved	in	RNA	polymerase	II	transcription	initiation;	possesses	in	vitro	histone	acetyltransferase	activity	but	its	role	in	vivo	appears	to	be	minor;	involved	in	promoter	binding	and	G1/S	progression	[Source:SGD;Acc:S000003506]
#INFO:	BIOGRID	NEIGHBOUR:	ALD5	Mitochondrial	aldehyde	dehydrogenase,	involved	in	regulation	or	biosynthesis	of	electron	transport	chain	components	and	acetate	formation;	activated	by	K+;	utilizes	NADP+	as	the	preferred	coenzyme;	constitutively	expressed	[Source:SGD;Acc:S000000875]
#INFO:	BIOGRID	NEIGHBOUR:	CTH1	Member	of	the	CCCH	zinc	finger	family;	has	similarity	to	mammalian	Tis11	protein,	which	activates	transcription	and	also	has	a	role	in	mRNA	degradation;	may	function	with	Tis11p	in	iron	homeostasis	[Source:SGD;Acc:S000002558]
#INFO:	BIOGRID	NEIGHBOUR:	DOA4	Ubiquitin	isopeptidase,	required	for	recycling	ubiquitin	from	proteasome-bound	ubiquitinated	intermediates,	acts	at	the	late	endosome/prevacuolar	compartment	to	recover	ubiquitin	from	ubiquitinated	membrane	proteins	en	route	to	the	vacuole	[Source:SGD;Acc:S000002476]
#INFO:	BIOGRID	NEIGHBOUR:	URA7	Major	CTP	synthase	isozyme	(see	also	URA8),	catalyzes	the	ATP-dependent	transfer	of	the	amide	nitrogen	from	glutamine	to	UTP,	forming	CTP,	the	final	step	in	de	novo	biosynthesis	of	pyrimidines;	involved	in	phospholipid	biosynthesis	[Source:SGD;Acc:S000000135]
#INFO:	BIOGRID	NEIGHBOUR:	SPC72	Component	of	the	cytoplasmic	Tub4p	(gamma-tubulin)	complex,	binds	spindle	pole	bodies	and	links	them	to	microtubules;	has	roles	in	astral	microtubule	formation	and	stabilization	[Source:SGD;Acc:S000000045]
#INFO:	BIOGRID	NEIGHBOUR:	MAK11	Protein	involved	in	an	early,	nucleolar	step	of	60S	ribosomal	subunit	biogenesis;	essential	for	cell	growth	and	replication	of	killer	M1	dsRNA	virus;	contains	four	beta-transducin	repeats	[Source:SGD;Acc:S000001504]
#INFO:	BIOGRID	NEIGHBOUR:	DPB2	Second	largest	subunit	of	DNA	polymerase	II	(DNA	polymerase	epsilon),	required	for	normal	yeast	chromosomal	replication;	expression	peaks	at	the	G1/S	phase	boundary;	potential	Cdc28p	substrate	[Source:SGD;Acc:S000006379]
#INFO:	BIOGRID	NEIGHBOUR:	SUI3	Beta	subunit	of	the	translation	initiation	factor	eIF2,	involved	in	the	identification	of	the	start	codon;	proposed	to	be	involved	in	mRNA	binding	[Source:SGD;Acc:S000006158]
#INFO:	BIOGRID	NEIGHBOUR:	HMG2	One	of	two	isozymes	of	HMG-CoA	reductase	that	convert	HMG-CoA	to	mevalonate,	a	rate-limiting	step	in	sterol	biosynthesis;	overproduction	induces	assembly	of	peripheral	ER	membrane	arrays	and	short	nuclear-associated	membrane	stacks	[Source:SGD;Acc:S000004442]
#INFO:	BIOGRID	NEIGHBOUR:	AIM36	Protein	of	unknown	function;	null	mutant	displays	reduced	respiratory	growth	and	elevated	frequency	of	mitochondrial	genome	loss;	the	authentic,	non-tagged	protein	is	detected	in	purified	mitochondria	in	high-throughput	studies	[Source:SGD;Acc:S000004766]
#INFO:	BIOGRID	NEIGHBOUR:	EHT1	Acyl-coenzymeA:ethanol	O-acyltransferase	that	plays	a	minor	role	in	medium-chain	fatty	acid	ethyl	ester	biosynthesis;	possesses	short-chain	esterase	activity;	localizes	to	lipid	particles	and	the	mitochondrial	outer	membrane	[Source:SGD;Acc:S000000381]
#INFO:	BIOGRID	NEIGHBOUR:	RPP1	Subunit	of	both	RNase	MRP	and	nuclear	RNase	P;	RNase	MRP	cleaves	pre-rRNA,	while	nuclear	RNase	P	cleaves	tRNA	precursors	to	generate	mature	5'	ends	and	facilitates	turnover	of	nuclear	RNAs	[Source:SGD;Acc:S000001104]
#INFO:	BIOGRID	NEIGHBOUR:	GNP1	High-affinity	glutamine	permease,	also	transports	Leu,	Ser,	Thr,	Cys,	Met	and	Asn;	expression	is	fully	dependent	on	Grr1p	and	modulated	by	the	Ssy1p-Ptr3p-Ssy5p	(SPS)	sensor	of	extracellular	amino	acids	[Source:SGD;Acc:S000002916]
#INFO:	BIOGRID	NEIGHBOUR:	RPL8B	Ribosomal	protein	L4	of	the	large	(60S)	ribosomal	subunit,	nearly	identical	to	Rpl8Ap	and	has	similarity	to	rat	L7a	ribosomal	protein;	mutation	results	in	decreased	amounts	of	free	60S	subunits	[Source:SGD;Acc:S000003968]
#INFO:	BIOGRID	NEIGHBOUR:	SRO9	Cytoplasmic	RNA-binding	protein	that	associates	with	translating	ribosomes;	involved	in	heme	regulation	of	Hap1p	as	a	component	of	the	HMC	complex,	also	involved	in	the	organization	of	actin	filaments;	contains	a	La	motif	[Source:SGD;Acc:S000000542]
#INFO:	BIOGRID	NEIGHBOUR:	MRPL33	Mitochondrial	ribosomal	protein	of	the	large	subunit	[Source:SGD;Acc:S000004899]
#INFO:	BIOGRID	NEIGHBOUR:	YJL045W	Minor	succinate	dehydrogenase	isozyme;	homologous	to	Sdh1p,	the	major	isozyme	reponsible	for	the	oxidation	of	succinate	and	transfer	of	electrons	to	ubiquinone;	induced	during	the	diauxic	shift	in	a	Cat8p-dependent	manner	[Source:SGD;Acc:S000003581]
#INFO:	BIOGRID	NEIGHBOUR:	YIL077C	Putative	protein	of	unknown	function;	the	authentic,	non-tagged	protein	is	detected	in	highly	purified	mitochondria	in	high-throughput	studies;	deletion	confers	sensitivity	to	4-(N-(S-glutathionylacetyl)amino)	phenylarsenoxide	(GSAO)	[Source:SGD;Acc:S000001339]
#INFO:	BIOGRID	NEIGHBOUR:	NPL4	Ubiquitin-binding	protein	involved	in	protein	degradation;	Cdc48p-Npl4p-Ufd1p	complex	participates	in	ER-associated	degradation	(ERAD)	while	Cdc48p-Npl4p-Vms1p	complex	participates	in	mitochondria-associated	degradation	(MAD)	[Source:SGD;Acc:S000000374]
#INFO:	BIOGRID	NEIGHBOUR:	PDX1	Dihydrolipoamide	dehydrogenase	(E3)-binding	protein	(E3BP)	of	the	mitochondrial	pyruvate	dehydrogenase	(PDH)	complex,	plays	a	structural	role	in	the	complex	by	binding	and	positioning	E3	to	the	dihydrolipoamide	acetyltransferase	(E2)	core	[Source:SGD;Acc:S000003425]
#INFO:	BIOGRID	NEIGHBOUR:	QCR10	Subunit	of	the	ubiqunol-cytochrome	c	oxidoreductase	complex	which	includes	Cobp,	Rip1p,	Cyt1p,	Cor1p,	Qcr2p,	Qcr6p,	Qcr7p,	Qcr8p,	Qcr9p,	and	Qcr10p	and	comprises	part	of	the	mitochondrial	respiratory	chain	[Source:SGD;Acc:S000003529]
#INFO:	BIOGRID	NEIGHBOUR:	SHY1	Mitochondrial	inner	membrane	protein	required	for	assembly	of	cytochrome	c	oxidase	(complex	IV);	associates	with	complex	IV	assembly	intermediates	and	complex	III/complex	IV	supercomplexes;	similar	to	human	SURF1	involved	in	Leigh	Syndrome	[Source:SGD;Acc:S000003344]
#INFO:	BIOGRID	NEIGHBOUR:	RPS26A	Protein	component	of	the	small	(40S)	ribosomal	subunit;	nearly	identical	to	Rps26Bp	and	has	similarity	to	rat	S26	ribosomal	protein	[Source:SGD;Acc:S000003157]
#INFO:	BIOGRID	NEIGHBOUR:	ERG3	C-5	sterol	desaturase,	catalyzes	the	introduction	of	a	C-5(6)	double	bond	into	episterol,	a	precursor	in	ergosterol	biosynthesis;	mutants	are	viable,	but	cannot	grow	on	non-fermentable	carbon	sources	[Source:SGD;Acc:S000004046]
#INFO:	BIOGRID	NEIGHBOUR:	RPL8A	Ribosomal	protein	L4	of	the	large	(60S)	ribosomal	subunit,	nearly	identical	to	Rpl8Bp	and	has	similarity	to	rat	L7a	ribosomal	protein;	mutation	results	in	decreased	amounts	of	free	60S	subunits	[Source:SGD;Acc:S000001025]
#INFO:	BIOGRID	NEIGHBOUR:	SGV1	Cyclin	(Bur2p)-dependent	protein	kinase	that	functions	in	transcriptional	regulation;	phosphorylates	the	carboxy-terminal	domain	of	Rpo21p	and	the	C-terminal	repeat	domain	of	Spt5p;	regulated	by	Cak1p;	similar	to	metazoan	CDK9	proteins	[Source:SGD;Acc:S000006365]
#INFO:	BIOGRID	NEIGHBOUR:	DRS1	Nucleolar	DEAD-box	protein	required	for	ribosome	assembly	and	function,	including	synthesis	of	60S	ribosomal	subunits;	constituent	of	66S	pre-ribosomal	particles	[Source:SGD;Acc:S000003931]
#INFO:	BIOGRID	NEIGHBOUR:	RPS14B	Ribosomal	protein	59	of	the	small	subunit,	required	for	ribosome	assembly	and	20S	pre-rRNA	processing;	mutations	confer	cryptopleurine	resistance;	nearly	identical	to	Rps14Ap	and	similar	to	E.	coli	S11	and	rat	S14	ribosomal	proteins	[Source:SGD;Acc:S000003727]
#INFO:	BIOGRID	NEIGHBOUR:	YPL264C	Putative	membrane	protein	of	unknown	function;	physically	interacts	with	Hsp82p;	YPL264C	is	not	an	essential	gene	[Source:SGD;Acc:S000006185]
#INFO:	BIOGRID	NEIGHBOUR:	KOG1	Subunit	of	TORC1,	a	rapamycin-sensitive	complex	involved	in	growth	control	that	contains	Tor1p	or	Tor2p,	Lst8p	and	Tco89p;	contains	four	HEAT	repeats	and	seven	WD-40	repeats;	may	act	as	a	scaffold	protein	to	couple	TOR	and	its	effectors	[Source:SGD;Acc:S000001229]
#INFO:	BIOGRID	NEIGHBOUR:	ERG24	C-14	sterol	reductase,	acts	in	ergosterol	biosynthesis;	mutants	accumulate	the	abnormal	sterol	ignosterol	(ergosta-8,14	dienol),	and	are	viable	under	anaerobic	growth	conditions	but	inviable	on	rich	medium	under	aerobic	conditions	[Source:SGD;Acc:S000005224]
#INFO:	BIOGRID	NEIGHBOUR:	RPL20B	Protein	component	of	the	large	(60S)	ribosomal	subunit,	nearly	identical	to	Rpl20Bp	and	has	similarity	to	rat	L18a	ribosomal	protein	[Source:SGD;Acc:S000004855]
#INFO:	BIOGRID	NEIGHBOUR:	HEK2	RNA	binding	protein	involved	in	the	asymmetric	localization	of	ASH1	mRNA;	represses	translation	of	ASH1	mRNA,	an	effect	reversed	by	Yck1p-dependent	phosphoryation;	regulates	telomere	position	effect	and	length;	similarity	to	hnRNP-K	[Source:SGD;Acc:S000000128]
#INFO:	BIOGRID	NEIGHBOUR:	PRP40	U1	snRNP	protein	involved	in	splicing,	interacts	with	the	branchpoint-binding	protein	during	the	formation	of	the	second	commitment	complex	[Source:SGD;Acc:S000001495]
#INFO:	BIOGRID	NEIGHBOUR:	NOP15	Constituent	of	66S	pre-ribosomal	particles,	involved	in	60S	ribosomal	subunit	biogenesis;	localizes	to	both	nucleolus	and	cytoplasm	[Source:SGD;Acc:S000005054]
#INFO:	BIOGRID	NEIGHBOUR:	MGA2	ER	membrane	protein	involved	in	regulation	of	OLE1	transcription,	acts	with	homolog	Spt23p;	inactive	ER	form	dimerizes	and	one	subunit	is	then	activated	by	ubiquitin/proteasome-dependent	processing	followed	by	nuclear	targeting	[Source:SGD;Acc:S000001472]
#INFO:	BIOGRID	NEIGHBOUR:	FAA1	Long	chain	fatty	acyl-CoA	synthetase,	activates	imported	fatty	acids	with	a	preference	for	C12:0-C16:0	chain	lengths;	functions	in	long	chain	fatty	acid	import;	accounts	for	most	acyl-CoA	synthetase	activity;	localized	to	lipid	particles	[Source:SGD;Acc:S000005844]
#INFO:	BIOGRID	NEIGHBOUR:	PHO91	Low-affinity	phosphate	transporter	of	the	vacuolar	membrane;	deletion	of	pho84,	pho87,	pho89,	pho90,	and	pho91	causes	synthetic	lethality;	transcription	independent	of	Pi	and	Pho4p	activity;	overexpression	results	in	vigorous	growth	[Source:SGD;Acc:S000005296]
#INFO:	BIOGRID	NEIGHBOUR:	NST1	Protein	of	unknown	function,	mediates	sensitivity	to	salt	stress;	interacts	physically	with	the	splicing	factor	Msl1p	and	also	displays	genetic	interaction	with	MSL1	[Source:SGD;Acc:S000005035]
#INFO:	BIOGRID	NEIGHBOUR:	PET10	Protein	of	unknown	function	that	co-purifies	with	lipid	particles;	expression	pattern	suggests	a	role	in	respiratory	growth;	computational	analysis	of	large-scale	protein-protein	interaction	data	suggests	a	role	in	ATP/ADP	exchange	[Source:SGD;Acc:S000001754]
#INFO:	BIOGRID	NEIGHBOUR:	YJR096W	Putative	xylose	and	arabinose	reductase;	member	of	the	aldo-keto	reductase	(AKR)	family;	GFP-fusion	protein	is	induced	in	response	to	the	DNA-damaging	agent	MMS	[Source:SGD;Acc:S000003857]
#INFO:	BIOGRID	NEIGHBOUR:	CBP4	Mitochondrial	protein	required	for	assembly	of	cytochrome	bc1	complex;	interacts	with	the	Cbp3p-Cbp6p	complex	and	newly	synthesized	cytochrome	b	(Cobp)	to	promote	assembly	of	Cobp	into	the	cytochrome	bc1	complex	[Source:SGD;Acc:S000003406]
#INFO:	BIOGRID	NEIGHBOUR:	ERG7	Lanosterol	synthase,	an	essential	enzyme	that	catalyzes	the	cyclization	of	squalene	2,3-epoxide,	a	step	in	ergosterol	biosynthesis	[Source:SGD;Acc:S000001114]
#INFO:	BIOGRID	NEIGHBOUR:	NAT5	Subunit	of	the	N-terminal	acetyltransferase	NatA	(Nat1p,	Ard1p,	Nat5p);	N-terminally	acetylates	many	proteins,	which	influences	multiple	processes	such	as	the	cell	cycle,	heat-shock	resistance,	mating,	sporulation,	and	telomeric	silencing	[Source:SGD;Acc:S000005779]
#INFO:	BIOGRID	NEIGHBOUR:	COY1	Golgi	membrane	protein	with	similarity	to	mammalian	CASP;	genetic	interactions	with	GOS1	(encoding	a	Golgi	snare	protein)	suggest	a	role	in	Golgi	function	[Source:SGD;Acc:S000001662]
#INFO:	BIOGRID	NEIGHBOUR:	GSP2	GTP	binding	protein	(mammalian	Ranp	homolog)	involved	in	the	maintenance	of	nuclear	organization,	RNA	processing	and	transport;	interacts	with	Kap121p,	Kap123p	and	Pdr6p	(karyophilin	betas);	Gsp1p	homolog	that	is	not	required	for	viability	[Source:SGD;Acc:S000005711]
#INFO:	BIOGRID	NEIGHBOUR:	DIC1	Mitochondrial	dicarboxylate	carrier,	integral	membrane	protein,	catalyzes	a	dicarboxylate-phosphate	exchange	across	the	inner	mitochondrial	membrane,	transports	cytoplasmic	dicarboxylates	into	the	mitochondrial	matrix	[Source:SGD;Acc:S000004340]
#INFO:	BIOGRID	NEIGHBOUR:	GIM5	Subunit	of	the	heterohexameric	cochaperone	prefoldin	complex	which	binds	specifically	to	cytosolic	chaperonin	and	transfers	target	proteins	to	it	[Source:SGD;Acc:S000004559]
#INFO:	BIOGRID	NEIGHBOUR:	PUS7	Pseudouridine	synthase,	catalyzes	pseudouridylation	at	positions	35	and	56	in	U2	snRNA,	position	50	in	5S	rRNA,	position	13	in	cytoplasmic	tRNAs,	and	position	35	in	pre-tRNA(Tyr);	conserved	in	archaea,	vertebrates,	and	some	bacteria	[Source:SGD;Acc:S000005769]
#INFO:	BIOGRID	NEIGHBOUR:	NOP53	Nucleolar	protein;	involved	in	biogenesis	of	the	60S	subunit	of	the	ribosome;	interacts	with	rRNA	processing	factors	Cbf5p	and	Nop2p;	null	mutant	is	viable	but	growth	is	severely	impaired	[Source:SGD;Acc:S000006067]
#INFO:	BIOGRID	NEIGHBOUR:	PMA2	Plasma	membrane	H+-ATPase,	isoform	of	Pma1p,	involved	in	pumping	protons	out	of	the	cell;	regulator	of	cytoplasmic	pH	and	plasma	membrane	potential	[Source:SGD;Acc:S000005957]
#INFO:	BIOGRID	NEIGHBOUR:	NAT2	Protein	with	an	apparent	role	in	acetylation	of	N-terminal	methionine	residues	[Source:SGD;Acc:S000003379]
#INFO:	BIOGRID	NEIGHBOUR:	RPS16A	Protein	component	of	the	small	(40S)	ribosomal	subunit;	identical	to	Rps16Ap	and	has	similarity	to	E.	coli	S9	and	rat	S16	ribosomal	proteins	[Source:SGD;Acc:S000002241]
#INFO:	BIOGRID	NEIGHBOUR:	SSH1	Subunit	of	the	Ssh1	translocon	complex;	Sec61p	homolog	involved	in	co-translational	pathway	of	protein	translocation;	not	essential	[Source:SGD;Acc:S000000487]
#INFO:	BIOGRID	NEIGHBOUR:	CAN1	Plasma	membrane	arginine	permease,	requires	phosphatidyl	ethanolamine	(PE)	for	localization,	exclusively	associated	with	lipid	rafts;	mutation	confers	canavanine	resistance	[Source:SGD;Acc:S000000789]
#INFO:	BIOGRID	NEIGHBOUR:	SHU1	Component	of	the	Shu	complex,	which	promotes	error-free	DNA	repair;	Shu	complex	mediates	inhibition	of	Srs2p	function	[Source:SGD;Acc:S000000998]
#INFO:	BIOGRID	NEIGHBOUR:	AIM5	Mitochondrial	inner	membrane	protein;	subunit	of	the	mitochondrial	inner	membrane	organizing	system	(MitOS,	MICOS,	or	MINOS),	a	scaffold-like	structure	on	the	intermembrane	space	side	of	the	inner	membrane	which	has	a	role	in	the	maintenance	of	cris	/.../ctions	and	inner	membrane	architecture	[Source:SGD;Acc:S000000466]
#INFO:	BIOGRID	NEIGHBOUR:	SHR3	Endoplasmic	reticulum	packaging	chaperone,	required	for	incorporation	of	amino	acid	permeases	into	COPII	coated	vesicles	for	transport	to	the	cell	surface	[Source:SGD;Acc:S000002371]
#INFO:	BIOGRID	NEIGHBOUR:	IRC6	Putative	protein	of	unknown	function;	null	mutant	displays	increased	levels	of	spontaneous	Rad52p	foci	[Source:SGD;Acc:S000001939]
#INFO:	BIOGRID	NEIGHBOUR:	NDI1	NADH:ubiquinone	oxidoreductase,	transfers	electrons	from	NADH	to	ubiquinone	in	the	respiratory	chain	but	does	not	pump	protons,	in	contrast	to	the	higher	eukaryotic	multisubunit	respiratory	complex	I;	phosphorylated;	homolog	of	human	AMID	[Source:SGD;Acc:S000004589]
#INFO:	BIOGRID	NEIGHBOUR:	APM1	Mu1-like	medium	subunit	of	the	clathrin-associated	protein	complex	(AP-1);	binds	clathrin;	involved	in	clathrin-dependent	Golgi	protein	sorting	[Source:SGD;Acc:S000006180]
#INFO:	BIOGRID	NEIGHBOUR:	ALD4	Mitochondrial	aldehyde	dehydrogenase,	required	for	growth	on	ethanol	and	conversion	of	acetaldehyde	to	acetate;	phosphorylated;	activity	is	K+	dependent;	utilizes	NADP+	or	NAD+	equally	as	coenzymes;	expression	is	glucose	repressed	[Source:SGD;Acc:S000005901]
#INFO:	BIOGRID	NEIGHBOUR:	ORC1	Largest	subunit	of	the	origin	recognition	complex,	which	directs	DNA	replication	by	binding	to	replication	origins	and	is	also	involved	in	transcriptional	silencing;	exhibits	ATPase	activity	[Source:SGD;Acc:S000004530]
#INFO:	BIOGRID	NEIGHBOUR:	HDA2	Subunit	of	a	possibly	tetrameric	trichostatin	A-sensitive	class	II	histone	deacetylase	complex	containing	an	Hda1p	homodimer	and	an	Hda2p-Hda3p	heterodimer;	involved	in	telomere	maintenance	[Source:SGD;Acc:S000002703]
#INFO:	BIOGRID	NEIGHBOUR:	STB2	Protein	that	interacts	with	Sin3p	in	a	two-hybrid	assay	and	is	part	of	a	large	protein	complex	with	Sin3p	and	Stb1p	[Source:SGD;Acc:S000004657]
#INFO:	BIOGRID	NEIGHBOUR:	ILV3	Dihydroxyacid	dehydratase,	catalyzes	third	step	in	the	common	pathway	leading	to	biosynthesis	of	branched-chain	amino	acids	[Source:SGD;Acc:S000003777]
#INFO:	BIOGRID	NEIGHBOUR:	SNL1	Protein	of	unknown	function	proposed	to	be	involved	in	nuclear	pore	complex	biogenesis	and	maintenance	as	well	as	protein	folding;	has	similarity	to	the	mammalian	BAG-1	protein	[Source:SGD;Acc:S000001278]
#INFO:	BIOGRID	NEIGHBOUR:	CHO2	Phosphatidylethanolamine	methyltransferase	(PEMT),	catalyzes	the	first	step	in	the	conversion	of	phosphatidylethanolamine	to	phosphatidylcholine	during	the	methylation	pathway	of	phosphatidylcholine	biosynthesis	[Source:SGD;Acc:S000003389]
#INFO:	BIOGRID	NEIGHBOUR:	PRE2	Beta	5	subunit	of	the	20S	proteasome,	responsible	for	the	chymotryptic	activity	of	the	proteasome	[Source:SGD;Acc:S000006307]
#INFO:	BIOGRID	NEIGHBOUR:	FIN1	Spindle	pole	body-related	intermediate	filament	protein;	forms	cell	cycle-specific	filaments	between	spindle	pole	bodies	in	mother	and	daughter	cells;	localization	cell-cycle	dependent;	involved	in	Glc7p	localization	and	regulation	[Source:SGD;Acc:S000002537]
#INFO:	BIOGRID	NEIGHBOUR:	YHR162W	Putative	protein	of	unknown	function;	green	fluorescent	protein	(GFP)-fusion	protein	localizes	to	the	mitochondrion	[Source:SGD;Acc:S000001205]
#INFO:	BIOGRID	NEIGHBOUR:	RPL28	Ribosomal	protein	of	the	large	(60S)	ribosomal	subunit,	has	similarity	to	E.	coli	L15	and	rat	L27a	ribosomal	proteins;	may	have	peptidyl	transferase	activity;	can	mutate	to	cycloheximide	resistance	[Source:SGD;Acc:S000003071]
#INFO:	BIOGRID	NEIGHBOUR:	RRI2	Subunit	of	the	COP9	signalosome	(CSN)	complex	that	cleaves	the	ubiquitin-like	protein	Nedd8	from	SCF	ubiquitin	ligases;	plays	a	role	in	the	mating	pheromone	response	[Source:SGD;Acc:S000005477]
#INFO:	BIOGRID	NEIGHBOUR:	WHI2	Protein	required,	with	binding	partner	Psr1p,	for	full	activation	of	the	general	stress	response,	possibly	through	Msn2p	dephosphorylation;	regulates	growth	during	the	diauxic	shift;	negative	regulator	of	G1	cyclin	expression	[Source:SGD;Acc:S000005569]
#INFO:	BIOGRID	NEIGHBOUR:	IDI1	Isopentenyl	diphosphate:dimethylallyl	diphosphate	isomerase	(IPP	isomerase),	catalyzes	an	essential	activation	step	in	the	isoprenoid	biosynthetic	pathway;	required	for	viability	[Source:SGD;Acc:S000006038]
#INFO:	BIOGRID	NEIGHBOUR:	SCD6	Protein	containing	an	Lsm	domain;	negatively	regulates	translation	initiation	via	48S	preinitiation	complex	assembly;	may	bind	RNA	and	have	a	role	in	RNA	processing;	overproduction	suppresses	null	mutation	in	clathrin	heavy	chain	gene	CHC1	[Source:SGD;Acc:S000006333]
#INFO:	BIOGRID	NEIGHBOUR:	MIA40	Essential	protein	of	the	mitochondrial	intermembrane	space	(IMS);	promotes	retention	of	newly	imported	proteins;	may	do	so	by	stabilizing	client	protein	folding	as	part	of	a	disulfide	relay	system	or	transferring	metal	to	client	proteins	[Source:SGD;Acc:S000001678]
#INFO:	BIOGRID	NEIGHBOUR:	VPS73	Mitochondrial	protein;	mutation	affects	vacuolar	protein	sorting;	putative	transporter;	member	of	the	sugar	porter	family	[Source:SGD;Acc:S000003072]
#INFO:	BIOGRID	NEIGHBOUR:	IDH2	Subunit	of	mitochondrial	NAD(+)-dependent	isocitrate	dehydrogenase,	which	catalyzes	the	oxidation	of	isocitrate	to	alpha-ketoglutarate	in	the	TCA	cycle;	phosphorylated	[Source:SGD;Acc:S000005662]
#INFO:	BIOGRID	NEIGHBOUR:	LSC2	Beta	subunit	of	succinyl-CoA	ligase,	which	is	a	mitochondrial	enzyme	of	the	TCA	cycle	that	catalyzes	the	nucleotide-dependent	conversion	of	succinyl-CoA	to	succinate	[Source:SGD;Acc:S000003476]
#INFO:	BIOGRID	NEIGHBOUR:	VPS28	Component	of	the	ESCRT-I	complex	(Stp22p,	Srn2p,	Vps28p,	and	Mvb12p),	which	is	involved	in	ubiquitin-dependent	sorting	of	proteins	into	the	endosome;	conserved	C-terminal	domain	interacts	with	ESCRT-III	subunit	Vps20p	[Source:SGD;Acc:S000005986]
#INFO:	BIOGRID	NEIGHBOUR:	RPB5	RNA	polymerase	subunit	ABC27,	common	to	RNA	polymerases	I,	II,	and	III;	contacts	DNA	and	affects	transactivation	[Source:SGD;Acc:S000000358]
#INFO:	BIOGRID	NEIGHBOUR:	MGR2	Protein	required	for	growth	of	cells	lacking	the	mitochondrial	genome	[Source:SGD;Acc:S000006019]
#INFO:	BIOGRID	NEIGHBOUR:	RPL18A	Protein	component	of	the	large	(60S)	ribosomal	subunit,	identical	to	Rpl18Bp	and	has	similarity	to	rat	L18	ribosomal	protein;	intron	of	RPL18A	pre-mRNA	forms	stem-loop	structures	that	are	a	target	for	Rnt1p	cleavage	leading	to	degradation	[Source:SGD;Acc:S000005480]
#INFO:	BIOGRID	NEIGHBOUR:	ESF2	Essential	nucleolar	protein	involved	in	pre-18S	rRNA	processing;	binds	to	RNA	and	stimulates	ATPase	activity	of	Dbp8;	involved	in	assembly	of	the	small	subunit	(SSU)	processome	[Source:SGD;Acc:S000005337]
#INFO:	BIOGRID	NEIGHBOUR:	ESF1	Nucleolar	protein	involved	in	pre-rRNA	processing;	depletion	causes	severely	decreased	18S	rRNA	levels	[Source:SGD;Acc:S000002773]
#INFO:	BIOGRID	NEIGHBOUR:	TOM22	Component	of	the	TOM	(translocase	of	outer	mitochondrial	membrane)	complex	responsible	for	initial	import	of	mitochondrially	directed	proteins;	acts	as	a	receptor	for	precursor	proteins	and	mediates	interaction	between	TOM	and	TIM	complexes	[Source:SGD;Acc:S000005075]
#INFO:	BIOGRID	NEIGHBOUR:	DRS2	Aminophospholipid	translocase	(flippase)	that	maintains	membrane	lipid	asymmetry	in	post-Golgi	secretory	vesicles;	contributes	to	clathrin-coated	vesicle	formation	and	endocytosis;	mutations	in	human	homolog	ATP8B1	result	in	liver	disease	[Source:SGD;Acc:S000000024]
#INFO:	BIOGRID	NEIGHBOUR:	YKL047W	Putative	protein	of	unknown	function,	predicted	to	be	palmitoylated;	green	fluorescent	protein	(GFP)-fusion	protein	localizes	to	the	cytoplasm	[Source:SGD;Acc:S000001530]
#INFO:	BIOGRID	NEIGHBOUR:	MAK5	Essential	nucleolar	protein,	putative	DEAD-box	RNA	helicase	required	for	maintenance	of	M1	dsRNA	virus;	involved	in	biogenesis	of	large	(60S)	ribosomal	subunits	[Source:SGD;Acc:S000000346]
#INFO:	BIOGRID	NEIGHBOUR:	ASH1	Zinc-finger	inhibitor	of	HO	transcription;	mRNA	is	localized	and	translated	in	the	distal	tip	of	anaphase	cells,	resulting	in	accumulation	of	Ash1p	in	daughter	cell	nuclei	and	inhibition	of	HO	expression;	potential	Cdc28p	substrate	[Source:SGD;Acc:S000001668]
#INFO:	BIOGRID	NEIGHBOUR:	PWP2	Conserved	90S	pre-ribosomal	component	essential	for	proper	endonucleolytic	cleavage	of	the	35	S	rRNA	precursor	at	A0,	A1,	and	A2	sites;	contains	eight	WD-repeats;	PWP2	deletion	leads	to	defects	in	cell	cycle	and	bud	morphogenesis	[Source:SGD;Acc:S000000653]
#INFO:	BIOGRID	NEIGHBOUR:	NOP2	Probable	RNA	m(5)C	methyltransferase,	essential	for	processing	and	maturation	of	27S	pre-rRNA	and	large	ribosomal	subunit	biogenesis;	localized	to	the	nucleolus;	constituent	of	66S	pre-ribosomal	particles	[Source:SGD;Acc:S000005005]
#INFO:	BIOGRID	NEIGHBOUR:	SPO21	Component	of	the	meiotic	outer	plaque	of	the	spindle	pole	body,	involved	in	modifying	the	meiotic	outer	plaque	that	is	required	prior	to	prospore	membrane	formation	[Source:SGD;Acc:S000005451]
#INFO:	BIOGRID	NEIGHBOUR:	RPL15A	Protein	component	of	the	large	(60S)	ribosomal	subunit,	nearly	identical	to	Rpl15Bp	and	has	similarity	to	rat	L15	ribosomal	protein;	binds	to	5.8	S	rRNA	[Source:SGD;Acc:S000004019]
#INFO:	BIOGRID	NEIGHBOUR:	NDL1	Homolog	of	nuclear	distribution	factor	NudE,	NUDEL;	interacts	with	Pac1p	and	regulates	dynein	targeting	to	microtubule	plus	ends	[Source:SGD;Acc:S000004244]
#INFO:	BIOGRID	NEIGHBOUR:	YAR1	Cytoplasmic	ankyrin-repeat	containing	protein	of	unknown	function,	proposed	to	link	the	processes	of	40S	ribosomal	subunit	biogenesis	and	adaptation	to	osmotic	and	oxidative	stress;	expression	repressed	by	heat	shock	[Source:SGD;Acc:S000006160]
#INFO:	BIOGRID	NEIGHBOUR:	SSF1	Constituent	of	66S	pre-ribosomal	particles,	required	for	ribosomal	large	subunit	maturation;	functionally	redundant	with	Ssf2p;	member	of	the	Brix	family	[Source:SGD;Acc:S000001108]
#INFO:	BIOGRID	NEIGHBOUR:	FEN1	Fatty	acid	elongase,	involved	in	sphingolipid	biosynthesis;	acts	on	fatty	acids	of	up	to	24	carbons	in	length;	mutations	have	regulatory	effects	on	1,3-beta-glucan	synthase,	vacuolar	ATPase,	and	the	secretory	pathway	[Source:SGD;Acc:S000000630]
#INFO:	BIOGRID	NEIGHBOUR:	PRX1	Mitochondrial	peroxiredoxin	(1-Cys	Prx)	with	thioredoxin	peroxidase	activity,	has	a	role	in	reduction	of	hydroperoxides;	reactivation	requires	Trr2p	and	glutathione;	induced	during	respiratory	growth	and	oxidative	stress;	phosphorylated	[Source:SGD;Acc:S000000160]
#INFO:	BIOGRID	NEIGHBOUR:	EHD3	3-hydroxyisobutyryl-CoA	hydrolase,	member	of	a	family	of	enoyl-CoA	hydratase/isomerases;	non-tagged	protein	is	detected	in	highly	purified	mitochondria	in	high-throughput	studies;	phosphorylated;	mutation	affects	fluid-phase	endocytosis	[Source:SGD;Acc:S000002443]
#INFO:	BIOGRID	NEIGHBOUR:	AVT4	Vacuolar	transporter,	exports	large	neutral	amino	acids	from	the	vacuole;	member	of	a	family	of	seven	S.	cerevisiae	genes	(AVT1-7)	related	to	vesicular	GABA-glycine	transporters	[Source:SGD;Acc:S000005045]
#INFO:	BIOGRID	NEIGHBOUR:	RPS9B	Protein	component	of	the	small	(40S)	ribosomal	subunit;	nearly	identical	to	Rps9Ap	and	has	similarity	to	E.	coli	S4	and	rat	S9	ribosomal	proteins	[Source:SGD;Acc:S000000393]
#INFO:	BIOGRID	NEIGHBOUR:	MRP13	Mitochondrial	ribosomal	protein	of	the	small	subunit	[Source:SGD;Acc:S000003316]
#INFO:	BIOGRID	NEIGHBOUR:	ERV41	Protein	localized	to	COPII-coated	vesicles,	forms	a	complex	with	Erv46p;	involved	in	the	membrane	fusion	stage	of	transport;	has	homology	to	human	ERGIC2	(PTX1)	protein	[Source:SGD;Acc:S000004532]
#INFO:	BIOGRID	NEIGHBOUR:	RPS18B	Protein	component	of	the	small	(40S)	ribosomal	subunit;	nearly	identical	to	Rps18Bp	and	has	similarity	to	E.	coli	S13	and	rat	S18	ribosomal	proteins	[Source:SGD;Acc:S000002858]
#INFO:	BIOGRID	NEIGHBOUR:	ODC2	Mitochondrial	inner	membrane	transporter,	exports	2-oxoadipate	and	2-oxoglutarate	from	the	mitochondrial	matrix	to	the	cytosol	for	use	in	lysine	and	glutamate	biosynthesis	and	in	lysine	catabolism	[Source:SGD;Acc:S000005748]
#INFO:	BIOGRID	NEIGHBOUR:	LAT1	Dihydrolipoamide	acetyltransferase	component	(E2)	of	pyruvate	dehydrogenase	complex,	which	catalyzes	the	oxidative	decarboxylation	of	pyruvate	to	acetyl-CoA	[Source:SGD;Acc:S000005015]
#INFO:	BIOGRID	NEIGHBOUR:	RPL3	Protein	component	of	the	large	(60S)	ribosomal	subunit,	has	similarity	to	E.	coli	L3	and	rat	L3	ribosomal	proteins;	involved	in	the	replication	and	maintenance	of	killer	double	stranded	RNA	virus	[Source:SGD;Acc:S000005589]
#INFO:	BIOGRID	NEIGHBOUR:	JJJ1	Co-chaperone	that	stimulates	the	ATPase	activity	of	Ssa1p,	required	for	a	late	step	of	ribosome	biogenesis;	associated	with	the	cytosolic	large	ribosomal	subunit;	contains	a	J-domain;	mutation	causes	defects	in	fluid-phase	endocytosis	[Source:SGD;Acc:S000005171]
#INFO:	BIOGRID	NEIGHBOUR:	NOB1	Essential	nuclear	protein	involved	in	proteasome	maturation	and	synthesis	of	40S	ribosomal	subunits;	required	for	cleavage	of	the	20S	pre-rRNA	to	generate	the	mature	18S	rRNA	[Source:SGD;Acc:S000005582]
#INFO:	BIOGRID	NEIGHBOUR:	MRPS12	Mitochondrial	protein;	may	interact	with	ribosomes	based	on	co-purification	experiments;	similar	to	E.	coli	and	human	mitochondrial	S12	ribosomal	proteins	[Source:SGD;Acc:S000005319]
#INFO:	BIOGRID	NEIGHBOUR:	DLD1	D-lactate	dehydrogenase,	oxidizes	D-lactate	to	pyruvate,	transcription	is	heme-dependent,	repressed	by	glucose,	and	derepressed	in	ethanol	or	lactate;	located	in	the	mitochondrial	inner	membrane	[Source:SGD;Acc:S000002333]
#INFO:	BIOGRID	NEIGHBOUR:	YFL034W	Putative	integral	membrane	protein	that	interacts	with	Rpp0p,	which	is	a	component	of	the	ribosomal	stalk	[Source:SGD;Acc:S000001860]
#INFO:	BIOGRID	NEIGHBOUR:	RPL1A	N-terminally	acetylated	protein	component	of	the	large	(60S)	ribosomal	subunit,	nearly	identical	to	Rpl1Bp	and	has	similarity	to	E.	coli	L1	and	rat	L10a	ribosomal	proteins;	rpl1a	rpl1b	double	null	mutation	is	lethal	[Source:SGD;Acc:S000006141]
#INFO:	BIOGRID	NEIGHBOUR:	SNF1	AMP-activated	serine/threonine	protein	kinase	found	in	a	complex	containing	Snf4p	and	members	of	the	Sip1p/Sip2p/Gal83p	family;	required	for	transcription	of	glucose-repressed	genes,	thermotolerance,	sporulation,	and	peroxisome	biogenesis	[Source:SGD;Acc:S000002885]
#INFO:	BIOGRID	NEIGHBOUR:	RMP1	Subunit	of	RNase	MRP,	which	processes	pre-rRNA	and	has	a	role	in	cell	cycle-regulated	degradation	of	daughter	cell-specific	mRNAs;	unlike	most	subunits,	not	shared	between	RNase	MRP	and	nuclear	RNase	P	[Source:SGD;Acc:S000004135]
#INFO:	BIOGRID	NEIGHBOUR:	IPI1	Essential	component	of	the	Rix1	complex	(with	Rix1p	and	Ipi3p)	that	is	required	for	processing	of	ITS2	sequences	from	35S	pre-rRNA;	Rix1	complex	associates	with	Mdn1p	in	pre-60S	ribosomal	particles	[Source:SGD;Acc:S000001127]
#INFO:	BIOGRID	NEIGHBOUR:	YBT1	Transporter	of	the	ATP-binding	cassette	(ABC)	family	involved	in	bile	acid	transport;	similar	to	mammalian	bile	transporters	[Source:SGD;Acc:S000003971]
#INFO:	BIOGRID	NEIGHBOUR:	CIT2	Citrate	synthase,	catalyzes	the	condensation	of	acetyl	coenzyme	A	and	oxaloacetate	to	form	citrate,	peroxisomal	isozyme	involved	in	glyoxylate	cycle;	expression	is	controlled	by	Rtg1p	and	Rtg2p	transcription	factors	[Source:SGD;Acc:S000000598]
#INFO:	BIOGRID	NEIGHBOUR:	AIM37	Mitochondrial	inner	membrane	protein;	component	of	the	mitochondrial	inner	membrane	organizing	system	(MitOS,	MICOS,	or	MINOS),	a	scaffold-like	structure	on	the	intermembrane	space	side	of	the	inner	membrane	which	has	a	role	in	the	maintenance	of	cr	/.../unctions	and	inner	membrane	architecture	[Source:SGD;Acc:S000005044]
#INFO:	BIOGRID	NEIGHBOUR:	MOT1	Essential	abundant	protein	involved	in	regulation	of	transcription,	removes	Spt15p	(TBP)	from	DNA	via	its	C-terminal	ATPase	activity,	forms	a	complex	with	TBP	that	binds	TATA	DNA	with	high	affinity	but	with	altered	specificity	[Source:SGD;Acc:S000006003]
#INFO:	BIOGRID	NEIGHBOUR:	RPS24B	Protein	component	of	the	small	(40S)	ribosomal	subunit;	identical	to	Rps24Bp	and	has	similarity	to	rat	S24	ribosomal	protein	[Source:SGD;Acc:S000000876]
#INFO:	BIOGRID	NEIGHBOUR:	MRP1	Mitochondrial	ribosomal	protein	of	the	small	subunit;	MRP1	exhibits	genetic	interactions	with	PET122,	encoding	a	COX3-specific	translational	activator,	and	with	PET123,	encoding	a	small	subunit	mitochondrial	ribosomal	protein	[Source:SGD;Acc:S000002755]
#INFO:	BIOGRID	NEIGHBOUR:	APM2	Protein	of	unknown	function,	homologous	to	the	medium	chain	of	mammalian	clathrin-associated	protein	complex;	involved	in	vesicular	transport	[Source:SGD;Acc:S000001011]
#INFO:	BIOGRID	NEIGHBOUR:	CHZ1	Histone	chaperone	for	Htz1p/H2A-H2B	dimer;	required	for	the	stabilization	of	the	Chz1p-Htz1-H2B	complex;	has	overlapping	function	with	Nap1p;	null	mutant	displays	weak	sensitivity	to	MMS	and	benomyl;	contains	a	highly	conserved	CHZ	motif	[Source:SGD;Acc:S000000832]
#INFO:	BIOGRID	NEIGHBOUR:	TAF11	TFIID	subunit	(40	kDa),	involved	in	RNA	polymerase	II	transcription	initiation,	similar	to	histone	H3	with	atypical	histone	fold	motif	of	Spt3-like	transcription	factors	[Source:SGD;Acc:S000004477]
#INFO:	BIOGRID	NEIGHBOUR:	COX8	Subunit	VIII	of	cytochrome	c	oxidase,	which	is	the	terminal	member	of	the	mitochondrial	inner	membrane	electron	transport	chain	[Source:SGD;Acc:S000004387]
#INFO:	BIOGRID	NEIGHBOUR:	LSM12	Protein	of	unknown	function	that	may	function	in	RNA	processing;	interacts	with	Pbp1p	and	Pbp4p	and	associates	with	ribosomes;	contains	an	RNA-binding	LSM	domain	and	an	AD	domain;	GFP-fusion	protein	is	induced	by	the	DNA-damaging	agent	MMS	[Source:SGD;Acc:S000001163]
#INFO:	BIOGRID	NEIGHBOUR:	SDH1	Flavoprotein	subunit	of	succinate	dehydrogenase	(Sdh1p,	Sdh2p,	Sdh3p,	Sdh4p),	which	couples	the	oxidation	of	succinate	to	the	transfer	of	electrons	to	ubiquinone	as	part	of	the	TCA	cycle	and	the	mitochondrial	respiratory	chain	[Source:SGD;Acc:S000001631]
#INFO:	BIOGRID	NEIGHBOUR:	AAC3	Mitochondrial	inner	membrane	ADP/ATP	translocator,	exchanges	cytosolic	ADP	for	mitochondrially	synthesized	ATP;	expressed	under	anaerobic	conditions;	similar	to	Pet9p	and	Aac1p;	has	roles	in	maintenance	of	viability	and	in	respiration	[Source:SGD;Acc:S000000289]
#INFO:	BIOGRID	NEIGHBOUR:	RAD50	Subunit	of	MRX	complex,	with	Mre11p	and	Xrs2p,	involved	in	processing	double-strand	DNA	breaks	in	vegetative	cells,	initiation	of	meiotic	DSBs,	telomere	maintenance,	and	nonhomologous	end	joining	[Source:SGD;Acc:S000005194]
#INFO:	BIOGRID	NEIGHBOUR:	IES1	Subunit	of	the	INO80	chromatin	remodeling	complex	[Source:SGD;Acc:S000001881]
#INFO:	BIOGRID	NEIGHBOUR:	RPL32	Protein	component	of	the	large	(60S)	ribosomal	subunit,	has	similarity	to	rat	L32	ribosomal	protein;	overexpression	disrupts	telomeric	silencing	[Source:SGD;Acc:S000000188]
#INFO:	BIOGRID	NEIGHBOUR:	ARG5,6	Protein	that	is	processed	in	the	mitochondrion	to	yield	acetylglutamate	kinase	and	N-acetyl-gamma-glutamyl-phosphate	reductase,	which	catalyze	the	2nd	and	3rd	steps	in	arginine	biosynthesis;	enzymes	form	a	complex	with	Arg2p	[Source:SGD;Acc:S000000871]
#INFO:	BIOGRID	NEIGHBOUR:	LSG1	Putative	GTPase	involved	in	60S	ribosomal	subunit	biogenesis;	required	for	the	release	of	Nmd3p	from	60S	subunits	in	the	cytoplasm	[Source:SGD;Acc:S000003067]
#INFO:	BIOGRID	NEIGHBOUR:	NOP14	Nucleolar	protein,	forms	a	complex	with	Noc4p	that	mediates	maturation	and	nuclear	export	of	40S	ribosomal	subunits;	also	present	in	the	small	subunit	processome	complex,	which	is	required	for	processing	of	pre-18S	rRNA	[Source:SGD;Acc:S000002307]
#INFO:	BIOGRID	NEIGHBOUR:	KRR1	Essential	nucleolar	protein	required	for	the	synthesis	of	18S	rRNA	and	for	the	assembly	of	40S	ribosomal	subunit	[Source:SGD;Acc:S000000564]
#INFO:	BIOGRID	NEIGHBOUR:	HFD1	Putative	fatty	aldehyde	dehydrogenase,	located	in	the	mitochondrial	outer	membrane	and	also	in	lipid	particles;	has	similarity	to	human	fatty	aldehyde	dehydrogenase	(FALDH)	which	is	implicated	in	Sjogren-Larsson	syndrome	[Source:SGD;Acc:S000004716]
#INFO:	BIOGRID	NEIGHBOUR:	TPD3	Regulatory	subunit	A	of	the	heterotrimeric	protein	phosphatase	2A	(PP2A),	which	also	contains	regulatory	subunit	Cdc55p	and	either	catalytic	subunit	Pph21p	or	Pph22p;	required	for	cell	morphogenesis	and	transcription	by	RNA	polymerase	III	[Source:SGD;Acc:S000000014]
#INFO:	BIOGRID	NEIGHBOUR:	RIP1	Ubiquinol-cytochrome-c	reductase,	a	Rieske	iron-sulfur	protein	of	the	mitochondrial	cytochrome	bc1	complex;	transfers	electrons	from	ubiquinol	to	cytochrome	c1	during	respiration	[Source:SGD;Acc:S000000750]
#INFO:	BIOGRID	NEIGHBOUR:	QCR6	Subunit	6	of	the	ubiquinol	cytochrome-c	reductase	complex,	which	is	a	component	of	the	mitochondrial	inner	membrane	electron	transport	chain;	highly	acidic	protein;	required	for	maturation	of	cytochrome	c1	[Source:SGD;Acc:S000001929]
#INFO:	BIOGRID	NEIGHBOUR:	VPS25	Component	of	the	ESCRT-II	complex,	which	is	involved	in	ubiquitin-dependent	sorting	of	proteins	into	the	endosome	[Source:SGD;Acc:S000003863]
#INFO:	BIOGRID	NEIGHBOUR:	ABF2	Mitochondrial	DNA-binding	protein	involved	in	mitochondrial	DNA	replication	and	recombination,	member	of	HMG1	DNA-binding	protein	family;	activity	may	be	regulated	by	protein	kinase	A	phosphorylation	[Source:SGD;Acc:S000004676]
#INFO:	BIOGRID	NEIGHBOUR:	RPL11B	Protein	component	of	the	large	(60S)	ribosomal	subunit,	nearly	identical	to	Rpl11Ap;	involved	in	ribosomal	assembly;	depletion	causes	degradation	of	proteins	and	RNA	of	the	60S	subunit;	has	similarity	to	E.	coli	L5	and	rat	L11	[Source:SGD;Acc:S000003317]
#INFO:	BIOGRID	NEIGHBOUR:	AI1	Reverse	transcriptase	required	for	splicing	of	the	COX1	pre-mRNA,	encoded	by	a	mobile	group	II	intron	within	the	mitochondrial	COX1	gene	[Source:SGD;Acc:S000007261]
#INFO:	BIOGRID	NEIGHBOUR:	CIT3	Dual	specificity	mitochondrial	citrate	and	methylcitrate	synthase;	catalyzes	the	condensation	of	acetyl-CoA	and	oxaloacetate	to	form	citrate	and	that	of	propionyl-CoA	and	oxaloacetate	to	form	2-methylcitrate	[Source:SGD;Acc:S000006205]
#INFO:	BIOGRID	NEIGHBOUR:	CIR2	Putative	ortholog	of	human	electron	transfer	flavoprotein	dehydrogenase	(ETF-dH);	found	in	a	large	supramolecular	complex	with	other	mitochondrial	dehydrogenases;	may	have	a	role	in	oxidative	stress	response	[Source:SGD;Acc:S000005883]
#INFO:	BIOGRID	NEIGHBOUR:	VPS36	Component	of	the	ESCRT-II	complex;	contains	the	GLUE	(GRAM	Like	Ubiquitin	binding	in	EAP45)	domain	which	is	involved	in	interactions	with	ESCRT-I	and	ubiquitin-dependent	sorting	of	proteins	into	the	endosome	[Source:SGD;Acc:S000004409]
#INFO:	BIOGRID	NEIGHBOUR:	EBP2	Required	for	25S	rRNA	maturation	and	60S	ribosomal	subunit	assembly;	localizes	to	the	nucleolus	and	in	foci	along	nuclear	periphery;	constituent	of	66S	pre-ribosomal	particles;	cooperates	with	Rrs1p	and	Mps3p	to	mediate	telomere	clustering	by	bindin	/.../p,	but	is	not	involved	in	telomere	tethering	[Source:SGD;Acc:S000001655]
#INFO:	BIOGRID	NEIGHBOUR:	TIM18	Component	of	the	mitochondrial	TIM22	complex	involved	in	insertion	of	polytopic	proteins	into	the	inner	membrane;	may	mediate	assembly	or	stability	of	the	complex	[Source:SGD;Acc:S000005823]
#INFO:	BIOGRID	NEIGHBOUR:	MRP20	Mitochondrial	ribosomal	protein	of	the	large	subunit	[Source:SGD;Acc:S000002813]
#INFO:	BIOGRID	NEIGHBOUR:	TRX3	Mitochondrial	thioredoxin,	highly	conserved	oxidoreductase	required	to	maintain	the	redox	homeostasis	of	the	cell,	forms	the	mitochondrial	thioredoxin	system	with	Trr2p,	redox	state	is	maintained	by	both	Trr2p	and	Glr1p	[Source:SGD;Acc:S000000679]
#INFO:	BIOGRID	NEIGHBOUR:	MAK21	Constituent	of	66S	pre-ribosomal	particles,	required	for	large	(60S)	ribosomal	subunit	biogenesis;	involved	in	nuclear	export	of	pre-ribosomes;	required	for	maintenance	of	dsRNA	virus;	homolog	of	human	CAATT-binding	protein	[Source:SGD;Acc:S000002467]
#INFO:	BIOGRID	NEIGHBOUR:	TIF5	Translation	initiation	factor	eIF5;	functions	both	as	a	GTPase-activating	protein	to	mediate	hydrolysis	of	ribosome-bound	GTP	and	as	a	GDP	dissociation	inhibitor	to	prevent	recycling	of	eIF2	[Source:SGD;Acc:S000006245]
#INFO:	BIOGRID	NEIGHBOUR:	GCN1	Positive	regulator	of	the	Gcn2p	kinase	activity,	forms	a	complex	with	Gcn20p;	proposed	to	stimulate	Gcn2p	activation	by	an	uncharged	tRNA	[Source:SGD;Acc:S000003163]
#INFO:	BIOGRID	NEIGHBOUR:	CCL1	Cyclin	associated	with	protein	kinase	Kin28p,	which	is	the	TFIIH-associated	carboxy-terminal	domain	(CTD)	kinase	involved	in	transcription	initiation	at	RNA	polymerase	II	promoters	[Source:SGD;Acc:S000006229]
#INFO:	BIOGRID	NEIGHBOUR:	MIR1	Mitochondrial	phosphate	carrier,	imports	inorganic	phosphate	into	mitochondria;	functionally	redundant	with	Pic2p	but	more	abundant	than	Pic2p	under	normal	conditions;	phosphorylated	[Source:SGD;Acc:S000003838]
#INFO:	BIOGRID	NEIGHBOUR:	MRPS16	Mitochondrial	ribosomal	protein	of	the	small	subunit	[Source:SGD;Acc:S000005934]
#INFO:	BIOGRID	NEIGHBOUR:	WHI3	RNA	binding	protein	that	sequesters	CLN3	mRNA	in	cytoplasmic	foci;	cytoplasmic	retention	factor	for	Cdc28p	and	associated	cyclins;	regulates	cell	fate	and	dose-dependently	regulates	the	critical	cell	size	required	for	passage	through	Start	[Source:SGD;Acc:S000005141]
#INFO:	BIOGRID	NEIGHBOUR:	POP6	Subunit	of	both	RNase	MRP	and	nuclear	RNase	P;	RNase	MRP	cleaves	pre-rRNA,	while	nuclear	RNase	P	cleaves	tRNA	precursors	to	generate	mature	5'	ends	and	facilitates	turnover	of	nuclear	RNAs	[Source:SGD;Acc:S000003262]
#INFO:	BIOGRID	NEIGHBOUR:	RPL42B	Protein	component	of	the	large	(60S)	ribosomal	subunit,	identical	to	Rpl42Ap	and	has	similarity	to	rat	L44;	required	for	propagation	of	the	killer	toxin-encoding	M1	double-stranded	RNA	satellite	of	the	L-A	double-stranded	RNA	virus	[Source:SGD;Acc:S000001183]
#INFO:	BIOGRID	NEIGHBOUR:	AIM43	Protein	of	unknown	function;	the	authentic,	non-tagged	protein	is	detected	in	purified	mitochondria	in	high-throughput	studies;	null	mutant	displays	elevated	frequency	of	mitochondrial	genome	loss	[Source:SGD;Acc:S000006020]
#INFO:	BIOGRID	NEIGHBOUR:	COG3	Essential	component	of	the	conserved	oligomeric	Golgi	complex	(Cog1p	through	Cog8p),	a	cytosolic	tethering	complex	that	functions	in	protein	trafficking	to	mediate	fusion	of	transport	vesicles	to	Golgi	compartments	[Source:SGD;Acc:S000000959]
#INFO:	BIOGRID	NEIGHBOUR:	KAR2	ATPase	involved	in	protein	import	into	the	ER,	also	acts	as	a	chaperone	to	mediate	protein	folding	in	the	ER	and	may	play	a	role	in	ER	export	of	soluble	proteins;	regulates	the	unfolded	protein	response	via	interaction	with	Ire1p	[Source:SGD;Acc:S000003571]
#INFO:	BIOGRID	NEIGHBOUR:	RPL27A	Protein	component	of	the	large	(60S)	ribosomal	subunit,	nearly	identical	to	Rpl27Bp	and	has	similarity	to	rat	L27	ribosomal	protein	[Source:SGD;Acc:S000001052]
#INFO:	BIOGRID	NEIGHBOUR:	CCM1	Mitochondrial	15s	rRNA-binding	protein;	required	for	intron	removal	of	COB	and	COX1	pre-mRNAs;	contains	pentatricopeptide	repeat	(PPR)	motifs;	mutant	is	respiratory	deficient	and	has	defective	plasma	membrane	electron	transport	[Source:SGD;Acc:S000003382]
#INFO:	BIOGRID	NEIGHBOUR:	ILV2	Acetolactate	synthase,	catalyses	the	first	common	step	in	isoleucine	and	valine	biosynthesis	and	is	the	target	of	several	classes	of	inhibitors,	localizes	to	the	mitochondria;	expression	of	the	gene	is	under	general	amino	acid	control	[Source:SGD;Acc:S000004714]
#INFO:	BIOGRID	NEIGHBOUR:	MAE1	Mitochondrial	malic	enzyme,	catalyzes	the	oxidative	decarboxylation	of	malate	to	pyruvate,	which	is	a	key	intermediate	in	sugar	metabolism	and	a	precursor	for	synthesis	of	several	amino	acids	[Source:SGD;Acc:S000001512]
#INFO:	BIOGRID	NEIGHBOUR:	YME1	Catalytic	subunit	of	the	mitochondrial	inner	membrane	i-AAA	protease	complex,	which	is	responsible	for	degradation	of	unfolded	or	misfolded	mitochondrial	gene	products;	mutation	causes	an	elevated	rate	of	mitochondrial	turnover	[Source:SGD;Acc:S000006228]
#INFO:	BIOGRID	NEIGHBOUR:	SAM50	Essential	component	of	the	Sorting	and	Assembly	Machinery	(SAM	or	TOB	complex)	of	the	mitochondrial	outer	membrane,	which	binds	precursors	of	beta-barrel	proteins	and	facilitates	their	outer	membrane	insertion;	homologous	to	bacterial	Omp85	[Source:SGD;Acc:S000004971]
#INFO:	BIOGRID	NEIGHBOUR:	RPS13	Protein	component	of	the	small	(40S)	ribosomal	subunit;	has	similarity	to	E.	coli	S15	and	rat	S13	ribosomal	proteins	[Source:SGD;Acc:S000002471]
#INFO:	BIOGRID	NEIGHBOUR:	TOM6	Component	of	the	TOM	(translocase	of	outer	membrane)	complex	responsible	for	recognition	and	initial	import	steps	for	all	mitochondrially	directed	proteins;	promotes	assembly	and	stability	of	the	TOM	complex	[Source:SGD;Acc:S000005571]
#INFO:	BIOGRID	NEIGHBOUR:	NAM7	ATP-dependent	RNA	helicase	of	the	SFI	superfamily	involved	in	nonsense	mediated	mRNA	decay;	required	for	efficient	translation	termination	at	nonsense	codons	and	targeting	of	NMD	substrates	to	P-bodies;	involved	in	telomere	maintenance	[Source:SGD;Acc:S000004685]
#INFO:	BIOGRID	NEIGHBOUR:	PKR1	V-ATPase	assembly	factor,	functions	with	other	V-ATPase	assembly	factors	in	the	ER	to	efficiently	assemble	the	V-ATPase	membrane	sector	(V0)	[Source:SGD;Acc:S000004730]
#INFO:	BIOGRID	NEIGHBOUR:	CRC1	Mitochondrial	inner	membrane	carnitine	transporter,	required	for	carnitine-dependent	transport	of	acetyl-CoA	from	peroxisomes	to	mitochondria	during	fatty	acid	beta-oxidation	[Source:SGD;Acc:S000005626]
#INFO:	BIOGRID	NEIGHBOUR:	YPR117W	Putative	protein	of	unknown	function	[Source:SGD;Acc:S000006321]
#INFO:	BIOGRID	NEIGHBOUR:	SAM35	Essential	component	of	the	sorting	and	assembly	machinery	(SAM	complex	or	TOB	complex)	of	the	mitochondrial	outer	membrane,	which	binds	precursors	of	beta-barrel	proteins	and	facilitates	their	insertion	into	the	outer	membrane	[Source:SGD;Acc:S000001125]
#INFO:	BIOGRID	NEIGHBOUR:	SMC4	Subunit	of	the	condensin	complex;	reorganizes	chromosomes	during	cell	division;	forms	a	complex	with	Smc2p	that	has	ATP-hydrolyzing	and	DNA-binding	activity;	required	for	tRNA	gene	clustering	at	the	nucleolus;	potential	Cdc28p	substrate	[Source:SGD;Acc:S000004076]
#INFO:	BIOGRID	NEIGHBOUR:	ULP1	Protease	that	specifically	cleaves	Smt3p	protein	conjugates;	required	for	cell	cycle	progression;	associates	with	nucleoporins	and	may	interact	with	septin	rings	during	telophase;	sequestered	to	the	nucleolus	under	stress	conditions	[Source:SGD;Acc:S000005941]
#INFO:	BIOGRID	NEIGHBOUR:	HHF2	Histone	H4,	core	histone	protein	required	for	chromatin	assembly	and	chromosome	function;	one	of	two	identical	histone	proteins	(see	also	HHF2);	contributes	to	telomeric	silencing;	N-terminal	domain	involved	in	maintaining	genomic	integrity	[Source:SGD;Acc:S000000213]
#INFO:	BIOGRID	NEIGHBOUR:	DBP9	ATP-dependent	RNA	helicase	of	the	DEAD-box	family	involved	in	biogenesis	of	the	60S	ribosomal	subunit	[Source:SGD;Acc:S000004266]
#INFO:	BIOGRID	NEIGHBOUR:	NNF2	Protein	that	exhibits	physical	and	genetic	interactions	with	Rpb8p,	which	is	a	subunit	of	RNA	polymerases	I,	II,	and	III;	computational	analysis	of	large-scale	protein-protein	interaction	data	suggests	a	role	in	chromosome	segregation	[Source:SGD;Acc:S000003321]
#INFO:	BIOGRID	NEIGHBOUR:	ALB1	Shuttling	pre-60S	factor;	involved	in	the	biogenesis	of	ribosomal	large	subunit;	interacts	directly	with	Arx1p;	responsible	for	Tif6p	recycling	defects	in	absence	of	Rei1p	[Source:SGD;Acc:S000003658]
#INFO:	BIOGRID	NEIGHBOUR:	NOP58	Protein	involved	in	pre-rRNA	processing,	18S	rRNA	synthesis,	and	snoRNA	synthesis;	component	of	the	small	subunit	processome	complex,	which	is	required	for	processing	of	pre-18S	rRNA	[Source:SGD;Acc:S000005837]
#INFO:	BIOGRID	NEIGHBOUR:	HHF1	Histone	H4,	core	histone	protein	required	for	chromatin	assembly	and	chromosome	function;	one	of	two	identical	histone	proteins	(see	also	HHF2);	contributes	to	telomeric	silencing;	N-terminal	domain	involved	in	maintaining	genomic	integrity	[Source:SGD;Acc:S000000213]
#INFO:	BIOGRID	NEIGHBOUR:	ECM10	Heat	shock	protein	of	the	Hsp70	family,	localized	in	mitochondrial	nucleoids,	plays	a	role	in	protein	translocation,	interacts	with	Mge1p	in	an	ATP-dependent	manner;	overexpression	induces	extensive	mitochondrial	DNA	aggregations	[Source:SGD;Acc:S000000756]
#INFO:	BIOGRID	NEIGHBOUR:	RPL14B	Protein	component	of	the	large	(60S)	ribosomal	subunit,	nearly	identical	to	Rpl14Ap	and	has	similarity	to	rat	L14	ribosomal	protein	[Source:SGD;Acc:S000000993]
#INFO:	BIOGRID	NEIGHBOUR:	SSF2	Protein	required	for	ribosomal	large	subunit	maturation,	functionally	redundant	with	Ssf1p;	member	of	the	Brix	family	[Source:SGD;Acc:S000002720]
#INFO:	BIOGRID	NEIGHBOUR:	UTP5	Subunit	of	U3-containing	Small	Subunit	(SSU)	processome	complex	involved	in	production	of	18S	rRNA	and	assembly	of	small	ribosomal	subunit	[Source:SGD;Acc:S000002806]
#INFO:	BIOGRID	NEIGHBOUR:	PWP1	Protein	with	WD-40	repeats	involved	in	rRNA	processing;	associates	with	trans-acting	ribosome	biogenesis	factors;	similar	to	beta-transducin	superfamily	[Source:SGD;Acc:S000004186]
#INFO:	BIOGRID	NEIGHBOUR:	LIA1	Deoxyhypusine	hydroxylase,	a	HEAT-repeat	containing	metalloenzyme	that	catalyzes	hypusine	formation;	binds	to	and	is	required	for	the	modification	of	Hyp2p	(eIF5A);	complements	S.	pombe	mmd1	mutants	defective	in	mitochondrial	positioning	[Source:SGD;Acc:S000003831]
#INFO:	BIOGRID	NEIGHBOUR:	VPS4	AAA-ATPase	involved	in	multivesicular	body	(MVB)	protein	sorting,	ATP-bound	Vps4p	localizes	to	endosomes	and	catalyzes	ESCRT-III	disassembly	and	membrane	release;	ATPase	activity	is	activated	by	Vta1p;	regulates	cellular	sterol	metabolism	[Source:SGD;Acc:S000006377]
#INFO:	BIOGRID	NEIGHBOUR:	KRE33	Essential	protein,	required	for	biogenesis	of	the	small	ribosomal	subunit;	heterozygous	mutant	shows	haploinsufficiency	in	K1	killer	toxin	resistance	[Source:SGD;Acc:S000005076]
#INFO:	BIOGRID	NEIGHBOUR:	MMF1	Mitochondrial	protein	required	for	transamination	of	isoleucine	but	not	of	valine	or	leucine;	may	regulate	specificity	of	branched-chain	transaminases	Bat1p	and	Bat2p;	interacts	genetically	with	mitochondrial	ribosomal	protein	genes	[Source:SGD;Acc:S000001313]
#INFO:	BIOGRID	NEIGHBOUR:	POP1	Subunit	of	both	RNase	MRP	and	nuclear	RNase	P;	RNase	MRP	cleaves	pre-rRNA,	while	nuclear	RNase	P	cleaves	tRNA	precursors	to	generate	mature	5'	ends	and	facilitates	turnover	of	nuclear	RNAs;	binds	to	the	RPR1	RNA	subunit	in	RNase	P	[Source:SGD;Acc:S000005165]
#INFO:	BIOGRID	NEIGHBOUR:	TIF4631	Translation	initiation	factor	eIF4G,	subunit	of	the	mRNA	cap-binding	protein	complex	(eIF4F)	that	also	contains	eIF4E	(Cdc33p);	interacts	with	Pab1p	and	with	eIF4A	(Tif1p);	also	has	a	role	in	biogenesis	of	the	large	ribosomal	subunit	[Source:SGD;Acc:S000003394]
#INFO:	BIOGRID	NEIGHBOUR:	ERV25	Protein	that	forms	a	heterotrimeric	complex	with	Erp1,	Erp2p,	and	Emp24,	member	of	the	p24	family	involved	in	endoplasmic	reticulum	to	Golgi	transport	[Source:SGD;Acc:S000004473]
#INFO:	BIOGRID	NEIGHBOUR:	MGM101	Protein	with	a	role	in	mitochondrial	DNA	recombinational	repair;	binds	to	and	catalyzes	the	annealing	of	single-stranded	mtDNA;	oligomerizes	to	form	rings	and	filaments;	related	to	Rad52-type	recombination	proteins,	with	limited	overall	similarity	b	/.../ring	conserved	functionally	important	residues;	component	of	the	mitochondrial	nucleoid,	required	for
#INFO:	BIOGRID	NEIGHBOUR:	RPL2B	Protein	component	of	the	large	(60S)	ribosomal	subunit,	identical	to	Rpl2Bp	and	has	similarity	to	E.	coli	L2	and	rat	L8	ribosomal	proteins	[Source:SGD;Acc:S000002104]
#INFO:	BIOGRID	NEIGHBOUR:	ATG17	Scaffold	protein	responsible	for	phagophore	assembly	site	organization;	regulatory	subunit	of	an	autophagy-specific	complex	that	includes	Atg1p	and	Atg13p;	stimulates	Atg1p	kinase	activity;	human	ortholog	RB1CC1/FIP200	interacts	with	p53,	which	inhi	/.../utophagy	in	human	cells	[Source:SGD;Acc:S000004415]
#INFO:	BIOGRID	NEIGHBOUR:	REC107	Protein	involved	in	early	stages	of	meiotic	recombination;	involved	in	coordination	between	the	initiation	of	recombination	and	the	first	division	of	meiosis;	part	of	a	complex	(Rec107p-Mei4p-Rec114p)	required	for	ds	break	formation	[Source:SGD;Acc:S000003782]
#INFO:	BIOGRID	NEIGHBOUR:	SUI1	Translation	initiation	factor	eIF1;	component	of	a	complex	involved	in	recognition	of	the	initiator	codon;	modulates	translation	accuracy	at	the	initiation	phase	[Source:SGD;Acc:S000005188]
#INFO:	BIOGRID	NEIGHBOUR:	MRD1	Essential	conserved	protein	that	is	part	of	the	90S	preribosome;	required	for	production	of	18S	rRNA	and	small	ribosomal	subunit;	contains	five	consensus	RNA-binding	domains	[Source:SGD;Acc:S000006316]
#INFO:	BIOGRID	NEIGHBOUR:	PET100	Chaperone	that	specifically	facilitates	the	assembly	of	cytochrome	c	oxidase,	integral	to	the	mitochondrial	inner	membrane;	interacts	with	a	subcomplex	of	subunits	VII,	VIIa,	and	VIII	(Cox7p,	Cox9p,	and	Cox8p)	but	not	with	the	holoenzyme	[Source:SGD;Acc:S000002486]
#INFO:	BIOGRID	NEIGHBOUR:	XRN1	Evolutionarily-conserved	5'-3'	exonuclease	component	of	cytoplasmic	processing	(P)	bodies	involved	in	mRNA	decay;	plays	a	role	in	microtubule-mediated	processes,	filamentous	growth,	ribosomal	RNA	maturation,	and	telomere	maintenance	[Source:SGD;Acc:S000003141]
#INFO:	BIOGRID	NEIGHBOUR:	RPS31	Fusion	protein	that	is	cleaved	to	yield	a	ribosomal	protein	of	the	small	(40S)	subunit	and	ubiquitin;	ubiquitin	may	facilitate	assembly	of	the	ribosomal	protein	into	ribosomes;	interacts	genetically	with	translation	factor	eIF2B	[Source:SGD;Acc:S000004157]
#INFO:	BIOGRID	NEIGHBOUR:	SMC6	Component	of	the	SMC5-SMC6	complex;	this	complex	plays	a	key	role	in	the	removal	of	X-shaped	DNA	structures	that	arise	between	sister	chromatids	during	DNA	replication	and	repair;	homologous	to	S.	pombe	rad18	[Source:SGD;Acc:S000004375]
#INFO:	BIOGRID	NEIGHBOUR:	PRP6	Splicing	factor,	component	of	the	U4/U6-U5	snRNP	complex	[Source:SGD;Acc:S000000259]
#INFO:	BIOGRID	NEIGHBOUR:	PKC1	Protein	serine/threonine	kinase	essential	for	cell	wall	remodeling	during	growth;	localized	to	sites	of	polarized	growth	and	the	mother-daughter	bud	neck;	homolog	of	the	alpha,	beta,	and	gamma	isoforms	of	mammalian	protein	kinase	C	(PKC)	[Source:SGD;Acc:S000000201]
#INFO:	BIOGRID	NEIGHBOUR:	NFS1	Cysteine	desulfurase	involved	in	iron-sulfur	cluster	(Fe/S)	biogenesis	and	in	thio-modification	of	mitochondrial	and	cytoplasmic	tRNAs;	essential	protein	located	predominantly	in	mitochondria	[Source:SGD;Acc:S000000522]
#INFO:	BIOGRID	NEIGHBOUR:	ETR1	2-enoyl	thioester	reductase,	member	of	the	medium	chain	dehydrogenase/reductase	family;	localized	to	in	mitochondria,	where	it	has	a	probable	role	in	fatty	acid	synthesis	[Source:SGD;Acc:S000000230]
#INFO:	BIOGRID	NEIGHBOUR:	FSF1	Putative	protein,	predicted	to	be	an	alpha-isopropylmalate	carrier;	belongs	to	the	sideroblastic-associated	protein	family;	non-tagged	protein	is	detected	in	purified	mitochondria;	likely	to	play	a	role	in	iron	homeostasis	[Source:SGD;Acc:S000005797]
#INFO:	BIOGRID	NEIGHBOUR:	RPS8A	Protein	component	of	the	small	(40S)	ribosomal	subunit;	identical	to	Rps8Bp	and	has	similarity	to	rat	S8	ribosomal	protein	[Source:SGD;Acc:S000000168]
#INFO:	BIOGRID	NEIGHBOUR:	NOP13	Nucleolar	protein	found	in	preribosomal	complexes;	contains	an	RNA	recognition	motif	(RRM)	[Source:SGD;Acc:S000005119]
#INFO:	BIOGRID	NEIGHBOUR:	AIM31	Putative	protein	of	unknown	function;	GFP-fusion	protein	localizes	to	mitochondria;	may	interact	with	respiratory	chain	complexes	III	or	IV;	null	mutant	is	viable	and	displays	reduced	frequency	of	mitochondrial	genome	loss	[Source:SGD;Acc:S000004492]
#INFO:	BIOGRID	NEIGHBOUR:	MAK3	Catalytic	subunit	of	N-terminal	acetyltransferase	of	the	NatC	type;	required	for	replication	of	dsRNA	virus	[Source:SGD;Acc:S000006255]
#INFO:	BIOGRID	NEIGHBOUR:	NSA2	Protein	constituent	of	66S	pre-ribosomal	particles,	contributes	to	processing	of	the	27S	pre-rRNA	[Source:SGD;Acc:S000000928]
#INFO:	BIOGRID	NEIGHBOUR:	BI3	Mitochondrial	mRNA	maturase,	forms	a	complex	with	Mrs1p	to	mediate	splicing	of	the	bI3	intron	of	the	COB	gene;	encoded	by	both	exon	and	intron	sequences	of	partially	processed	COB	mRNA	[Source:SGD;Acc:S000007272]
#INFO:	BIOGRID	NEIGHBOUR:	RPT6	One	of	six	ATPases	of	the	19S	regulatory	particle	of	the	26S	proteasome	involved	in	the	degradation	of	ubiquitinated	substrates;	bound	by	ubiquitin-protein	ligases	Ubr1p	and	Ufd4p;	localized	mainly	to	the	nucleus	throughout	the	cell	cycle	[Source:SGD;Acc:S000003016]
#INFO:	BIOGRID	NEIGHBOUR:	OPT2	Oligopeptide	transporter;	member	of	the	OPT	family,	with	potential	orthologs	in	S.	pombe	and	C.	albicans;	also	plays	a	role	in	formation	of	mature	vacuoles	[Source:SGD;Acc:S000006398]
#INFO:	BIOGRID	NEIGHBOUR:	STM1	Protein	required	for	optimal	translation	under	nutrient	stress;	perturbs	association	of	Yef3p	with	ribosomes;	involved	in	TOR	signaling;	binds	G4	quadruplex	and	purine	motif	triplex	nucleic	acid;	helps	maintain	telomere	structure	[Source:SGD;Acc:S000004140]
#INFO:	BIOGRID	NEIGHBOUR:	RPL36B	Protein	component	of	the	large	(60S)	ribosomal	subunit,	nearly	identical	to	Rpl36Ap	and	has	similarity	to	rat	L36	ribosomal	protein;	binds	to	5.8	S	rRNA	[Source:SGD;Acc:S000006438]
#INFO:	BIOGRID	NEIGHBOUR:	ODC1	Mitochondrial	inner	membrane	transporter,	exports	2-oxoadipate	and	2-oxoglutarate	from	the	mitochondrial	matrix	to	the	cytosol	for	lysine	and	glutamate	biosynthesis	and	lysine	catabolism;	suppresses,	in	multicopy,	an	fmc1	null	mutation	[Source:SGD;Acc:S000006055]
#INFO:	BIOGRID	NEIGHBOUR:	COX5B	Subunit	Vb	of	cytochrome	c	oxidase,	which	is	the	terminal	member	of	the	mitochondrial	inner	membrane	electron	transport	chain;	predominantly	expressed	during	anaerobic	growth	while	its	isoform	Va	(Cox5Ap)	is	expressed	during	aerobic	growth	[Source:SGD;Acc:S000001373]
#INFO:	BIOGRID	NEIGHBOUR:	NAM2	Mitochondrial	leucyl-tRNA	synthetase,	also	has	a	direct	role	in	splicing	of	several	mitochondrial	group	I	introns;	indirectly	required	for	mitochondrial	genome	maintenance	[Source:SGD;Acc:S000004374]
#INFO:	BIOGRID	NEIGHBOUR:	DHH1	Cytoplasmic	DExD/H-box	helicase,	stimulates	mRNA	decapping;	coordinates	distinct	steps	in	mRNA	function	and	decay,	interacts	with	both	the	decapping	and	deadenylase	complexes,	may	have	a	role	in	mRNA	export	and	translation;	C-terminus	of	Dhh1p	inter	/.../ith	Ngr1p	and	promotes	POR1,	but	not	EDC1	mRNA	decay	[Source:SGD;Acc:S000002319]
#INFO:	BIOGRID	NEIGHBOUR:	SBH2	Ssh1p-Sss1p-Sbh2p	complex	component,	involved	in	protein	translocation	into	the	endoplasmic	reticulum;	homologous	to	Sbh1p	[Source:SGD;Acc:S000002127]
#INFO:	BIOGRID	NEIGHBOUR:	RRP12	Protein	required	for	export	of	the	ribosomal	subunits;	associates	with	the	RNA	components	of	the	pre-ribosomes;	has	a	role	in	nuclear	import	in	association	with	Pse1p;	contains	HEAT-repeats	[Source:SGD;Acc:S000005933]
#INFO:	BIOGRID	NEIGHBOUR:	RSA4	WD-repeat	protein	involved	in	ribosome	biogenesis;	may	interact	with	ribosomes;	required	for	maturation	and	efficient	intra-nuclear	transport	or	pre-60S	ribosomal	subunits,	localizes	to	the	nucleolus	[Source:SGD;Acc:S000000668]
#INFO:	BIOGRID	NEIGHBOUR:	DBP10	Putative	ATP-dependent	RNA	helicase	of	the	DEAD-box	protein	family,	constituent	of	66S	pre-ribosomal	particles;	essential	protein	involved	in	ribosome	biogenesis	[Source:SGD;Acc:S000002189]
#INFO:	BIOGRID	NEIGHBOUR:	PBS2	MAP	kinase	kinase	of	the	HOG	signaling	pathway;	activated	under	severe	osmotic	stress;	mitophagy-specific	regulator;	plays	a	role	in	regulating	Ty1	transposition	[Source:SGD;Acc:S000003664]
#INFO:	BIOGRID	NEIGHBOUR:	SNF8	Component	of	the	ESCRT-II	complex,	which	is	involved	in	ubiquitin-dependent	sorting	of	proteins	into	the	endosome;	appears	to	be	functionally	related	to	SNF7;	involved	in	glucose	derepression	[Source:SGD;Acc:S000005923]
#INFO:	BIOGRID	NEIGHBOUR:	MRPL8	Mitochondrial	ribosomal	protein	of	the	large	subunit	[Source:SGD;Acc:S000003599]
#INFO:	BIOGRID	NEIGHBOUR:	NAT4	N	alpha-acetyl-transferase,	involved	in	acetylation	of	the	N-terminal	residues	of	histones	H4	and	H2A	[Source:SGD;Acc:S000004673]
#INFO:	BIOGRID	NEIGHBOUR:	RAD4	Protein	that	recognizes	and	binds	damaged	DNA	(with	Rad23p)	during	nucleotide	excision	repair;	subunit	of	Nuclear	Excision	Repair	Factor	2	(NEF2);	also	involved,	with	Rad23p,	in	turnover	of	ubiquitylated	proteins	[Source:SGD;Acc:S000000964]
#INFO:	BIOGRID	NEIGHBOUR:	DAD2	Essential	subunit	of	the	Dam1	complex	(aka	DASH	complex),	couples	kinetochores	to	the	force	produced	by	MT	depolymerization	thereby	aiding	in	chromosome	segregation;	is	transferred	to	the	kinetochore	prior	to	mitosis	[Source:SGD;Acc:S000001791]
#INFO:	BIOGRID	NEIGHBOUR:	RPA135	RNA	polymerase	I	second	largest	subunit	A135	[Source:SGD;Acc:S000006214]
#INFO:	BIOGRID	NEIGHBOUR:	PFD1	Subunit	of	heterohexameric	prefoldin,	which	binds	cytosolic	chaperonin	and	transfers	target	proteins	to	it;	involved	in	the	biogenesis	of	actin	and	of	alpha-	and	gamma-tubulin	[Source:SGD;Acc:S000003715]
#INFO:	BIOGRID	NEIGHBOUR:	SRL2	Protein	of	unknown	function;	overexpression	suppresses	the	lethality	caused	by	a	rad53	null	mutation	[Source:SGD;Acc:S000004072]
#INFO:	BIOGRID	NEIGHBOUR:	ERP1	Protein	that	forms	a	heterotrimeric	complex	with	Erp2p,	Emp24p,	and	Erv25p;	member,	along	with	Emp24p	and	Erv25p,	of	the	p24	family	involved	in	ER	to	Golgi	transport	and	localized	to	COPII-coated	vesicles	[Source:SGD;Acc:S000002129]
#INFO:	BIOGRID	NEIGHBOUR:	RPL40A	Fusion	protein,	identical	to	Rpl40Bp,	that	is	cleaved	to	yield	ubiquitin	and	a	ribosomal	protein	of	the	large	(60S)	ribosomal	subunit	with	similarity	to	rat	L40;	ubiquitin	may	facilitate	assembly	of	the	ribosomal	protein	into	ribosomes	[Source:SGD;Acc:S000001410]
#INFO:	BIOGRID	NEIGHBOUR:	UBC13	Ubiquitin-conjugating	enzyme	involved	in	the	error-free	DNA	postreplication	repair	pathway;	interacts	with	Mms2p	to	assemble	ubiquitin	chains	at	the	Ub	Lys-63	residue;	DNA	damage	triggers	redistribution	from	the	cytoplasm	to	the	nucleus	[Source:SGD;Acc:S000002499]
#INFO:	BIOGRID	NEIGHBOUR:	SEC10	Essential	100kDa	subunit	of	the	exocyst	complex	(Sec3p,	Sec5p,	Sec6p,	Sec8p,	Sec10p,	Sec15p,	Exo70p,	and	Exo84p),	which	has	the	essential	function	of	mediating	polarized	targeting	of	secretory	vesicles	to	active	sites	of	exocytosis	[Source:SGD;Acc:S000004156]
#INFO:	BIOGRID	NEIGHBOUR:	SHM1	Mitochondrial	serine	hydroxymethyltransferase,	converts	serine	to	glycine	plus	5,10	methylenetetrahydrofolate;	involved	in	generating	precursors	for	purine,	pyrimidine,	amino	acid,	and	lipid	biosynthesis;	reverse	reaction	generates	serine	[Source:SGD;Acc:S000000467]
#INFO:	BIOGRID	NEIGHBOUR:	FMP52	Protein	of	unknown	function,	localized	to	the	mitochondrial	outer	membrane;	induced	by	treatment	with	8-methoxypsoralen	and	UVA	irradiation	[Source:SGD;Acc:S000000806]
#INFO:	BIOGRID	NEIGHBOUR:	RPL10	Protein	component	of	the	large	(60S)	ribosomal	subunit,	responsible	for	joining	the	40S	and	60S	subunits;	regulates	translation	initiation;	has	similarity	to	rat	L10	ribosomal	protein	and	to	members	of	the	QM	gene	family	[Source:SGD;Acc:S000004065]
#INFO:	BIOGRID	NEIGHBOUR:	SSB1	Cytoplasmic	ATPase	that	is	a	ribosome-associated	molecular	chaperone,	functions	with	J-protein	partner	Zuo1p;	may	be	involved	in	folding	of	newly-made	polypeptide	chains;	member	of	the	HSP70	family;	interacts	with	phosphatase	subunit	Reg1p	[Source:SGD;Acc:S000002388]
#INFO:	BIOGRID	NEIGHBOUR:	ACF2	Intracellular	beta-1,3-endoglucanase,	expression	is	induced	during	sporulation;	may	have	a	role	in	cortical	actin	cytoskeleton	assembly	[Source:SGD;Acc:S000004134]
#INFO:	BIOGRID	NEIGHBOUR:	SSL2	Component	of	RNA	polymerase	transcription	factor	TFIIH	holoenzyme;	has	DNA-dependent	ATPase/helicase	activity	and	is	required,	with	Rad3p,	for	unwinding	promoter	DNA;	interacts	functionally	with	TFIIB	and	has	roles	in	transcription	start	site	select	/.../d	in	gene	looping	to	juxtapose	initiation	and	termination	regions;	involved	in	DNA
#INFO:	BIOGRID	NEIGHBOUR:	RPS8B	Protein	component	of	the	small	(40S)	ribosomal	subunit;	identical	to	Rps8Bp	and	has	similarity	to	rat	S8	ribosomal	protein	[Source:SGD;Acc:S000000168]
#INFO:	BIOGRID	NEIGHBOUR:	NUP116	Subunit	of	the	Nup82	subcomplex	of	the	nuclear	pore	complex;	localized	to	both	sides	of	the	pore;	contains	a	repetitive	GLFG	motif	that	interacts	with	mRNA	export	factor	Mex67p	and	with	karyopherin	Kap95p;	homologous	to	Nup100p	[Source:SGD;Acc:S000004650]
#INFO:	BIOGRID	NEIGHBOUR:	DAP1	Heme-binding	protein	involved	in	regulation	of	cytochrome	P450	protein	Erg11p;	damage	response	protein,	related	to	mammalian	membrane	progesterone	receptors;	mutations	lead	to	defects	in	telomeres,	mitochondria,	and	sterol	synthesis	[Source:SGD;Acc:S000006091]
#INFO:	BIOGRID	NEIGHBOUR:	RPL9A	Protein	component	of	the	large	(60S)	ribosomal	subunit,	nearly	identical	to	Rpl9Bp	and	has	similarity	to	E.	coli	L6	and	rat	L9	ribosomal	proteins	[Source:SGD;Acc:S000003115]
#INFO:	BIOGRID	NEIGHBOUR:	NIP100	Large	subunit	of	the	dynactin	complex,	which	is	involved	in	partitioning	the	mitotic	spindle	between	mother	and	daughter	cells;	putative	ortholog	of	mammalian	p150(glued)	[Source:SGD;Acc:S000006095]
#INFO:	BIOGRID	NEIGHBOUR:	SEC62	Essential	subunit	of	Sec63	complex	(Sec63p,	Sec62p,	Sec66p	and	Sec72p);	with	Sec61	complex,	Kar2p/BiP	and	Lhs1p	forms	a	channel	competent	for	SRP-dependent	and	post-translational	SRP-independent	protein	targeting	and	import	into	the	ER	[Source:SGD;Acc:S000006015]
#INFO:	BIOGRID	NEIGHBOUR:	NSP1	Essential	component	of	the	nuclear	pore	complex,	which	mediates	nuclear	import	and	export,	found	in	both	the	Nup82	and	Nic96	complexes	[Source:SGD;Acc:S000003577]
#INFO:	BIOGRID	NEIGHBOUR:	NUC1	Major	mitochondrial	nuclease,	has	RNAse	and	DNA	endo-	and	exonucleolytic	activities;	has	roles	in	mitochondrial	recombination,	apoptosis	and	maintenance	of	polyploidy	[Source:SGD;Acc:S000003744]
#INFO:	BIOGRID	NEIGHBOUR:	PHO86	Endoplasmic	reticulum	(ER)	resident	protein	required	for	ER	exit	of	the	high-affinity	phosphate	transporter	Pho84p,	specifically	required	for	packaging	of	Pho84p	into	COPII	vesicles	[Source:SGD;Acc:S000003653]
#INFO:	BIOGRID	NEIGHBOUR:	GPI2	Protein	involved	in	the	synthesis	of	N-acetylglucosaminyl	phosphatidylinositol	(GlcNAc-PI),	the	first	intermediate	in	the	synthesis	of	glycosylphosphatidylinositol	(GPI)	anchors;	homologous	to	the	human	PIG-C	protein	[Source:SGD;Acc:S000005997]
#INFO:	BIOGRID	NEIGHBOUR:	RPL31A	Protein	component	of	the	large	(60S)	ribosomal	subunit,	nearly	identical	to	Rpl31Bp	and	has	similarity	to	rat	L31	ribosomal	protein;	associates	with	the	karyopherin	Sxm1p;	loss	of	both	Rpl31p	and	Rpl39p	confers	lethality	[Source:SGD;Acc:S000002233]
#INFO:	BIOGRID	NEIGHBOUR:	SEC27	Essential	beta'-coat	protein	of	the	COPI	coatomer,	involved	in	ER-to-Golgi	and	Golgi-to-ER	transport;	contains	WD40	domains	that	mediate	cargo	selective	interactions;	0.45	sequence	identity	to	mammalian	beta'-COP	[Source:SGD;Acc:S000003105]
#INFO:	BIOGRID	NEIGHBOUR:	RLP24	Essential	protein	with	similarity	to	Rpl24Ap	and	Rpl24Bp,	associated	with	pre-60S	ribosomal	subunits	and	required	for	ribosomal	large	subunit	biogenesis	[Source:SGD;Acc:S000003999]
#INFO:	BIOGRID	NEIGHBOUR:	RPL7B	Protein	component	of	the	large	(60S)	ribosomal	subunit,	nearly	identical	to	Rpl7Ap	and	has	similarity	to	E.	coli	L30	and	rat	L7	ribosomal	proteins;	contains	a	conserved	C-terminal	Nucleic	acid	Binding	Domain	(NDB2)	[Source:SGD;Acc:S000006119]
#INFO:	BIOGRID	NEIGHBOUR:	DIA4	Probable	mitochondrial	seryl-tRNA	synthetase,	mutant	displays	increased	invasive	and	pseudohyphal	growth	[Source:SGD;Acc:S000001053]
#INFO:	BIOGRID	NEIGHBOUR:	SCS7	Sphingolipid	alpha-hydroxylase,	functions	in	the	alpha-hydroxylation	of	sphingolipid-associated	very	long	chain	fatty	acids,	has	both	cytochrome	b5-like	and	hydroxylase/desaturase	domains,	not	essential	for	growth	[Source:SGD;Acc:S000004885]
#INFO:	BIOGRID	NEIGHBOUR:	RPS2	Protein	component	of	the	small	(40S)	subunit,	essential	for	control	of	translational	accuracy;	phosphorylation	by	C-terminal	domain	kinase	I	(CTDK-I)	enhances	translational	accuracy;	methylated	on	one	or	more	arginine	residues	by	Hmt1p	[Source:SGD;Acc:S000003091]
#INFO:	BIOGRID	NEIGHBOUR:	YTM1	Constituent	of	66S	pre-ribosomal	particles,	forms	a	complex	with	Nop7p	and	Erb1p	that	is	required	for	maturation	of	the	large	ribosomal	subunit;	has	seven	C-terminal	WD	repeats	[Source:SGD;Acc:S000005798]
#INFO:	BIOGRID	NEIGHBOUR:	SLF1	RNA	binding	protein	that	associates	with	polysomes;	proposed	to	be	involved	in	regulating	mRNA	translation;	involved	in	the	copper-dependent	mineralization	of	copper	sulfide	complexes	on	cell	surface	in	cells	cultured	in	copper	salts	[Source:SGD;Acc:S000002923]
#INFO:	BIOGRID	NEIGHBOUR:	RIB3	3,4-dihydroxy-2-butanone-4-phosphate	synthase	(DHBP	synthase),	required	for	riboflavin	biosynthesis	from	ribulose-5-phosphate,	also	has	an	unrelated	function	in	mitochondrial	respiration	[Source:SGD;Acc:S000002895]
#INFO:	BIOGRID	NEIGHBOUR:	MPP10	Component	of	the	SSU	processome	and	90S	preribosome,	required	for	pre-18S	rRNA	processing,	interacts	with	and	controls	the	stability	of	Imp3p	and	Imp4p,	essential	for	viability;	similar	to	human	Mpp10p	[Source:SGD;Acc:S000003762]
#INFO:	BIOGRID	NEIGHBOUR:	POC4	Component	of	a	heterodimeric	Poc4p-Irc25p	chaperone	involved	in	assembly	of	alpha	subunits	into	the	20S	proteasome;	may	regulate	formation	of	proteasome	isoforms	with	alternative	subunits	under	different	conditions	[Source:SGD;Acc:S000006065]
#INFO:	BIOGRID	NEIGHBOUR:	TPK2	cAMP-dependent	protein	kinase	catalytic	subunit;	promotes	vegetative	growth	in	response	to	nutrients	via	the	Ras-cAMP	signaling	pathway;	partially	redundant	with	Tpk1p	and	Tpk3p;	localizes	to	P-bodies	during	stationary	phase	[Source:SGD;Acc:S000006124]
#INFO:	BIOGRID	NEIGHBOUR:	EFB1	Translation	elongation	factor	1	beta;	stimulates	nucleotide	exchange	to	regenerate	EF-1	alpha-GTP	for	the	next	elongation	cycle;	part	of	the	EF-1	complex,	which	facilitates	binding	of	aminoacyl-tRNA	to	the	ribosomal	A	site	[Source:SGD;Acc:S000000003]
#INFO:	BIOGRID	NEIGHBOUR:	CAR1	Arginase,	responsible	for	arginine	degradation,	expression	responds	to	both	induction	by	arginine	and	nitrogen	catabolite	repression;	disruption	enhances	freeze	tolerance	[Source:SGD;Acc:S000006032]
#INFO:	BIOGRID	NEIGHBOUR:	CMD1	Calmodulin;	Ca++	binding	protein	that	regulates	Ca++	independent	processes	(mitosis,	bud	growth,	actin	organization,	endocytosis,	etc.)	and	Ca++	dependent	processes	(stress-activated	pathways),	targets	include	Nuf1p,	Myo2p	and	calcineurin	[Source:SGD;Acc:S000000313]
#INFO:	BIOGRID	NEIGHBOUR:	GPI17	Transmembrane	protein	subunit	of	the	glycosylphosphatidylinositol	transamidase	complex	that	adds	GPIs	to	newly	synthesized	proteins;	human	PIG-Sp	homolog	[Source:SGD;Acc:S000002842]
#INFO:	BIOGRID	NEIGHBOUR:	TIM50	Essential	component	of	the	Translocase	of	the	Inner	Mitochondrial	membrane	(TIM23	complex);	acts	as	receptor	for	the	TIM23	complex	guiding	incoming	precursors	from	the	TOM	complex;	may	control	the	gating	of	the	Tim23p-Tim17p	channel	[Source:SGD;Acc:S000005984]
#INFO:	BIOGRID	NEIGHBOUR:	KAP122	Karyopherin	beta,	responsible	for	import	of	the	Toa1p-Toa2p	complex	into	the	nucleus;	binds	to	nucleoporins	Nup1p	and	Nup2p;	may	play	a	role	in	regulation	of	pleiotropic	drug	resistance	[Source:SGD;Acc:S000002984]
#INFO:	BIOGRID	NEIGHBOUR:	TPT1	tRNA	2'-phosphotransferase,	catalyzes	the	final	step	in	yeast	tRNA	splicing:	the	transfer	of	the	2'-PO(4)	from	the	splice	junction	to	NAD(+)	to	form	ADP-ribose	1''-2''cyclic	phosphate	and	nicotinamide	[Source:SGD;Acc:S000005462]
#INFO:	BIOGRID	NEIGHBOUR:	SLK19	Kinetochore-associated	protein	required	for	normal	segregation	of	chromosomes	in	meiosis	and	mitosis;	component	of	the	FEAR	regulatory	network,	which	promotes	Cdc14p	release	from	the	nucleolus	during	anaphase;	potential	Cdc28p	substrate	[Source:SGD;Acc:S000005721]
#INFO:	BIOGRID	NEIGHBOUR:	MRPS28	Mitochondrial	ribosomal	protein	of	the	small	subunit	[Source:SGD;Acc:S000002745]
#INFO:	BIOGRID	NEIGHBOUR:	SEC63	Essential	subunit	of	Sec63	complex	(Sec63p,	Sec62p,	Sec66p	and	Sec72p);	with	Sec61	complex,	Kar2p/BiP	and	Lhs1p	forms	a	channel	competent	for	SRP-dependent	and	post-translational	SRP-independent	protein	targeting	and	import	into	the	ER	[Source:SGD;Acc:S000005780]
#INFO:	BIOGRID	NEIGHBOUR:	RPS16B	Protein	component	of	the	small	(40S)	ribosomal	subunit;	identical	to	Rps16Ap	and	has	similarity	to	E.	coli	S9	and	rat	S16	ribosomal	proteins	[Source:SGD;Acc:S000002241]
#INFO:	BIOGRID	NEIGHBOUR:	SCO2	Protein	anchored	to	the	mitochondrial	inner	membrane,	similar	to	Sco1p	and	may	have	a	redundant	function	with	Sco1p	in	delivery	of	copper	to	cytochrome	c	oxidase;	interacts	with	Cox2p	[Source:SGD;Acc:S000000228]
#INFO:	BIOGRID	NEIGHBOUR:	PDH1	Mitochondrial	protein	that	participates	in	respiration,	induced	by	diauxic	shift;	homologous	to	E.	coli	PrpD,	may	take	part	in	the	conversion	of	2-methylcitrate	to	2-methylisocitrate	[Source:SGD;Acc:S000006206]
#INFO:	BIOGRID	NEIGHBOUR:	YHM2	Carrier	protein	that	exports	citrate	from	and	imports	oxoglutarate	into	the	mitochondrion,	causing	net	export	of	NADPH	reducing	equivalents;	also	associates	with	mt	nucleoids	and	has	a	role	in	replication	and	segregation	of	the	mt	genome	[Source:SGD;Acc:S000004854]
#INFO:	BIOGRID	NEIGHBOUR:	CYS4	Cystathionine	beta-synthase,	catalyzes	synthesis	of	cystathionine	from	serine	and	homocysteine,	the	first	committed	step	in	cysteine	biosynthesis;	responsible	for	hydrogen	sulfide	generation;	mutations	in	human	ortholog	cause	homocystinuria	[Source:SGD;Acc:S000003387]
#INFO:	BIOGRID	NEIGHBOUR:	ARB1	ATPase	of	the	ATP-binding	cassette	(ABC)	family	involved	in	40S	and	60S	ribosome	biogenesis,	has	similarity	to	Gcn20p;	shuttles	from	nucleus	to	cytoplasm,	physically	interacts	with	Tif6p,	Lsg1p	[Source:SGD;Acc:S000000838]
#INFO:	BIOGRID	NEIGHBOUR:	NOC2	Protein	that	forms	a	nucleolar	complex	with	Mak21p	that	binds	to	90S	and	66S	pre-ribosomes,	as	well	as	a	nuclear	complex	with	Noc3p	that	binds	to	66S	pre-ribosomes;	both	complexes	mediate	intranuclear	transport	of	ribosomal	precursors	[Source:SGD;Acc:S000005732]
#INFO:	BIOGRID	NEIGHBOUR:	SSA4	Heat	shock	protein	that	is	highly	induced	upon	stress;	plays	a	role	in	SRP-dependent	cotranslational	protein-membrane	targeting	and	translocation;	member	of	the	HSP70	family;	cytoplasmic	protein	that	concentrates	in	nuclei	upon	starvation	[Source:SGD;Acc:S000000905]
#INFO:	BIOGRID	NEIGHBOUR:	DYN1	Cytoplasmic	heavy	chain	dynein,	microtubule	motor	protein,	required	for	anaphase	spindle	elongation;	involved	in	spindle	assembly,	chromosome	movement,	and	spindle	orientation	during	cell	division,	targeted	to	microtubule	tips	by	Pac1p	[Source:SGD;Acc:S000001762]
#INFO:	BIOGRID	NEIGHBOUR:	YNK1	Nucleoside	diphosphate	kinase,	catalyzes	the	transfer	of	gamma	phosphates	from	nucleoside	triphosphates,	usually	ATP,	to	nucleoside	diphosphates	by	a	mechanism	that	involves	formation	of	an	autophosphorylated	enzyme	intermediate	[Source:SGD;Acc:S000001550]
#INFO:	BIOGRID	NEIGHBOUR:	ACH1	Protein	with	CoA	transferase	activity,	particularly	for	CoASH	transfer	from	succinyl-CoA	to	acetate;	has	minor	acetyl-CoA-hydrolase	activity;	phosphorylated;	required	for	acetate	utilization	and	for	diploid	pseudohyphal	growth	[Source:SGD;Acc:S000000111]
#INFO:	BIOGRID	NEIGHBOUR:	RPL17A	Protein	component	of	the	large	(60S)	ribosomal	subunit,	nearly	identical	to	Rpl17Bp	and	has	similarity	to	E.	coli	L22	and	rat	L17	ribosomal	proteins;	copurifies	with	the	Dam1	complex	(aka	DASH	complex)	[Source:SGD;Acc:S000001663]
#INFO:	BIOGRID	NEIGHBOUR:	ELA1	Elongin	A;	F-box	protein	that	forms	a	heterodimer	with	Elc1p	and	is	required	for	ubiquitin-dependent	degradation	of	the	RNA	Polymerase	II	subunit	Rpo21p;	subunit	of	the	Elongin-Cullin-Socs	(ECS)	ligase	complex	[Source:SGD;Acc:S000005174]
#INFO:	BIOGRID	NEIGHBOUR:	COX2	Subunit	II	of	cytochrome	c	oxidase,	which	is	the	terminal	member	of	the	mitochondrial	inner	membrane	electron	transport	chain;	one	of	three	mitochondrially-encoded	subunits	[Source:SGD;Acc:S000007281]
#INFO:	BIOGRID	NEIGHBOUR:	RPL35A	Protein	component	of	the	large	(60S)	ribosomal	subunit,	identical	to	Rpl35Ap	and	has	similarity	to	rat	L35	ribosomal	protein	[Source:SGD;Acc:S000002295]
#INFO:	BIOGRID	NEIGHBOUR:	PHB2	Subunit	of	the	prohibitin	complex	(Phb1p-Phb2p),	a	1.2	MDa	ring-shaped	inner	mitochondrial	membrane	chaperone	that	stabilizes	newly	synthesized	proteins;	determinant	of	replicative	life	span;	involved	in	mitochondrial	segregation	[Source:SGD;Acc:S000003463]
#INFO:	BIOGRID	NEIGHBOUR:	GIM3	Subunit	of	the	heterohexameric	cochaperone	prefoldin	complex	which	binds	specifically	to	cytosolic	chaperonin	and	transfers	target	proteins	to	it	[Source:SGD;Acc:S000005097]
#INFO:	BIOGRID	NEIGHBOUR:	NHP6A	High-mobility	group	(HMG)	protein	that	binds	to	and	remodels	nucleosomes;	involved	in	recruiting	FACT	and	other	chromatin	remodelling	complexes	to	the	chromosomes;	functionally	redundant	with	Nhp6Bp;	homologous	to	mammalian	HMGB1	and	HMGB2	[Source:SGD;Acc:S000006256]
#INFO:	BIOGRID	NEIGHBOUR:	YBR016W	Tail-anchored	plasma	membrane	protein	containing	a	conserved	CYSTM	module;	predicted	to	be	palmitoylated;	has	similarity	to	hydrophilins,	which	are	involved	in	the	adaptive	response	to	hyperosmotic	conditions	[Source:SGD;Acc:S000000220]
#INFO:	BIOGRID	NEIGHBOUR:	RPL23B	Protein	component	of	the	large	(60S)	ribosomal	subunit,	identical	to	Rpl23Bp	and	has	similarity	to	E.	coli	L14	and	rat	L23	ribosomal	proteins	[Source:SGD;Acc:S000000183]
#INFO:	BIOGRID	NEIGHBOUR:	UBI4	Ubiquitin,	becomes	conjugated	to	proteins,	marking	them	for	selective	degradation	via	the	ubiquitin-26S	proteasome	system;	essential	for	the	cellular	stress	response;	encoded	as	a	polyubiquitin	precursor	comprised	of	5	head-to-tail	repeats	[Source:SGD;Acc:S000003962]
#INFO:	BIOGRID	NEIGHBOUR:	RPL14A	N-terminally	acetylated	protein	component	of	the	large	(60S)	ribosomal	subunit,	nearly	identical	to	Rpl14Bp	and	has	similarity	to	rat	L14	ribosomal	protein;	rpl14a	csh5	double	null	mutant	exhibits	synthetic	slow	growth	[Source:SGD;Acc:S000001489]
#INFO:	BIOGRID	NEIGHBOUR:	NAF1	RNA-binding	protein	required	for	the	assembly	of	box	H/ACA	snoRNPs	and	thus	for	pre-rRNA	processing,	forms	a	complex	with	Shq1p	and	interacts	with	H/ACA	snoRNP	components	Nhp2p	and	Cbf5p;	similar	to	Gar1p	[Source:SGD;Acc:S000005068]
#INFO:	BIOGRID	NEIGHBOUR:	MSB3	GTPase-activating	protein	for	Sec4p	and	several	other	Rab	GTPases,	regulates	exocytosis	via	its	action	on	Sec4p,	also	required	for	proper	actin	organization;	similar	to	Msb4p;	both	Msb3p	and	Msb4p	localize	to	sites	of	polarized	growth	[Source:SGD;Acc:S000005237]
#INFO:	BIOGRID	NEIGHBOUR:	MOS2	Mitochondrial	inner	membrane	protein;	non-essential	component	of	the	mitochondrial	inner	membrane	organizing	system	(MINOS,	MitOS,	or	MICOS),	a	scaffold-like	structure	on	the	intermembrane	space	side	of	the	inner	membrane	which	has	a	role	in	the	mai	/.../ce	of	crista	junctions	and	inner	membrane	architecture	[Source:SGD;Acc:S000003467]
#INFO:	BIOGRID	NEIGHBOUR:	SED5	cis-Golgi	t-SNARE	syntaxin	required	for	vesicular	transport	between	the	ER	and	the	Golgi	complex,	binds	at	least	9	SNARE	proteins	[Source:SGD;Acc:S000004016]
#INFO:	BIOGRID	NEIGHBOUR:	YHR192W	Putative	protein	of	unknown	function;	green	fluorescent	protein	(GFP)-fusion	protein	localizes	to	the	cytoplasm	and	is	induced	in	response	to	the	DNA-damaging	agent	MMS	[Source:SGD;Acc:S000001235]
#INFO:	BIOGRID	NEIGHBOUR:	ATP14	Subunit	h	of	the	F0	sector	of	mitochondrial	F1F0	ATP	synthase,	which	is	a	large,	evolutionarily	conserved	enzyme	complex	required	for	ATP	synthesis	[Source:SGD;Acc:S000004286]
#INFO:	BIOGRID	NEIGHBOUR:	TIM21	Nonessential	subunit	of	the	Translocase	of	the	Inner	Mitochondrial	membrane	(TIM23	complex);	interacts	with	the	Translocase	of	the	Outer	Mitochondrial	membrane	(TOM	complex)	and	with	respiratory	enzymes;	may	regulate	TIM23	complex	activity	[Source:SGD;Acc:S000003265]
#INFO:	BIOGRID	NEIGHBOUR:	ARD1	Subunit	of	N-terminal	acetyltransferase	NatA	(Nat1p,	Ard1p,	Nat5p);	acetylates	many	proteins	and	thus	affects	telomeric	silencing,	cell	cycle,	heat-shock	resistance,	mating,	and	sporulation;	human	Ard1p	levels	are	elevated	in	cancer	cells	[Source:SGD;Acc:S000001055]
#INFO:	BIOGRID	NEIGHBOUR:	ACP1	Mitochondrial	matrix	acyl	carrier	protein,	involved	in	biosynthesis	of	octanoate,	which	is	a	precursor	to	lipoic	acid;	activated	by	phosphopantetheinylation	catalyzed	by	Ppt2p	[Source:SGD;Acc:S000001675]
#INFO:	BIOGRID	NEIGHBOUR:	CMK1	Calmodulin-dependent	protein	kinase;	may	play	a	role	in	stress	response,	many	CA++/calmodulan	dependent	phosphorylation	substrates	demonstrated	in	vitro,	amino	acid	sequence	similar	to	Cmk2p	and	mammalian	Cam	Kinase	II	[Source:SGD;Acc:S000001910]
#INFO:	BIOGRID	NEIGHBOUR:	DID4	Class	E	Vps	protein	of	the	ESCRT-III	complex,	required	for	sorting	of	integral	membrane	proteins	into	lumenal	vesicles	of	multivesicular	bodies,	and	for	delivery	of	newly	synthesized	vacuolar	enzymes	to	the	vacuole,	involved	in	endocytosis	[Source:SGD;Acc:S000001485]
#INFO:	BIOGRID	NEIGHBOUR:	CDC23	Subunit	of	the	Anaphase-Promoting	Complex/Cyclosome	(APC/C),	which	is	a	ubiquitin-protein	ligase	required	for	degradation	of	anaphase	inhibitors,	including	mitotic	cyclins,	during	the	metaphase/anaphase	transition	[Source:SGD;Acc:S000001209]
#INFO:	BIOGRID	NEIGHBOUR:	DBP7	Putative	ATP-dependent	RNA	helicase	of	the	DEAD-box	family	involved	in	ribosomal	biogenesis;	essential	for	growth	under	anaerobic	conditions	[Source:SGD;Acc:S000001732]
#INFO:	BIOGRID	NEIGHBOUR:	MDN1	Huge	dynein-related	AAA-type	ATPase	(midasin),	forms	extended	pre-60S	particle	with	the	Rix1	complex	(Rix1p-Ipi1p-Ipi3p);	acts	in	removal	of	ribosomal	biogenesis	factors	at	successive	steps	of	pre-60S	assembly	and	export	from	nucleus	[Source:SGD;Acc:S000004096]
#INFO:	BIOGRID	NEIGHBOUR:	UBP10	Ubiquitin-specific	protease	that	deubiquitinates	ubiquitin-protein	moieties;	may	regulate	silencing	by	acting	on	Sir4p;	involved	in	posttranscriptionally	regulating	Gap1p	and	possibly	other	transporters;	primarily	located	in	the	nucleus	[Source:SGD;Acc:S000005130]
#INFO:	BIOGRID	NEIGHBOUR:	ECM29	Scaffold	protein	that	assists	in	association	of	the	proteasome	core	particle	with	the	regulatory	particle;	degraded	by	the	mature	proteasome	after	assembly;	contains	HEAT-like	repeats	[Source:SGD;Acc:S000001022]
#INFO:	BIOGRID	NEIGHBOUR:	YTA12	Component,	with	Afg3p,	of	the	mitochondrial	inner	membrane	m-AAA	protease	that	mediates	degradation	of	misfolded	or	unassembled	proteins	and	is	also	required	for	correct	assembly	of	mitochondrial	enzyme	complexes	[Source:SGD;Acc:S000004695]
#INFO:	BIOGRID	NEIGHBOUR:	RPS4A	Protein	component	of	the	small	(40S)	ribosomal	subunit;	mutation	affects	20S	pre-rRNA	processing;	identical	to	Rps4Bp	and	has	similarity	to	rat	S4	ribosomal	protein	[Source:SGD;Acc:S000003906]
#INFO:	BIOGRID	NEIGHBOUR:	RAD51	Strand	exchange	protein,	forms	a	helical	filament	with	DNA	that	searches	for	homology;	involved	in	the	recombinational	repair	of	double-strand	breaks	in	DNA	during	vegetative	growth	and	meiosis;	homolog	of	Dmc1p	and	bacterial	RecA	protein	[Source:SGD;Acc:S000000897]
#INFO:	BIOGRID	NEIGHBOUR:	RPS10B	Protein	component	of	the	small	(40S)	ribosomal	subunit;	nearly	identical	to	Rps10Ap	and	has	similarity	to	rat	ribosomal	protein	S10	[Source:SGD;Acc:S000004843]
#INFO:	BIOGRID	NEIGHBOUR:	ECM16	Essential	DEAH-box	ATP-dependent	RNA	helicase	specific	to	the	U3	snoRNP,	predominantly	nucleolar	in	distribution,	required	for	18S	rRNA	synthesis	[Source:SGD;Acc:S000004735]
#INFO:	BIOGRID	NEIGHBOUR:	RPL13A	Protein	component	of	the	large	(60S)	ribosomal	subunit,	nearly	identical	to	Rpl13Bp;	not	essential	for	viability;	has	similarity	to	rat	L13	ribosomal	protein	[Source:SGD;Acc:S000002240]
#INFO:	BIOGRID	NEIGHBOUR:	SPC1	Subunit	of	the	signal	peptidase	complex	(SPC),	which	cleaves	the	signal	sequence	from	proteins	targeted	to	the	endoplasmic	reticulum	(ER),	homolog	of	the	SPC12	subunit	of	mammalian	signal	peptidase	complex	[Source:SGD;Acc:S000003770]
#INFO:	BIOGRID	NEIGHBOUR:	PDB1	E1	beta	subunit	of	the	pyruvate	dehydrogenase	(PDH)	complex,	which	is	an	evolutionarily-conserved	multi-protein	complex	found	in	mitochondria	[Source:SGD;Acc:S000000425]
#INFO:	BIOGRID	NEIGHBOUR:	PSD2	Phosphatidylserine	decarboxylase	of	the	Golgi	and	vacuolar	membranes,	converts	phosphatidylserine	to	phosphatidylethanolamine	[Source:SGD;Acc:S000003402]
#INFO:	BIOGRID	NEIGHBOUR:	FCP1	Carboxy-terminal	domain	(CTD)	phosphatase,	essential	for	dephosphorylation	of	the	repeated	C-terminal	domain	of	the	RNA	polymerase	II	large	subunit	(Rpo21p)	[Source:SGD;Acc:S000004890]
#INFO:	BIOGRID	NEIGHBOUR:	NSA1	Constituent	of	66S	pre-ribosomal	particles,	involved	in	60S	ribosomal	subunit	biogenesis	[Source:SGD;Acc:S000003079]
#INFO:	BIOGRID	NEIGHBOUR:	TES1	Peroxisomal	acyl-CoA	thioesterase	likely	to	be	involved	in	fatty	acid	oxidation	rather	than	fatty	acid	synthesis;	conserved	protein	also	found	in	human	peroxisomes;	TES1	mRNA	levels	increase	during	growth	on	fatty	acids	[Source:SGD;Acc:S000003780]
#INFO:	BIOGRID	NEIGHBOUR:	REG1	Regulatory	subunit	of	type	1	protein	phosphatase	Glc7p,	involved	in	negative	regulation	of	glucose-repressible	genes	[Source:SGD;Acc:S000002435]
#INFO:	BIOGRID	NEIGHBOUR:	ARP2	Essential	component	of	the	Arp2/3	complex,	which	is	a	highly	conserved	actin	nucleation	center	required	for	the	motility	and	integrity	of	actin	patches;	involved	in	endocytosis	and	membrane	growth	and	polarity	[Source:SGD;Acc:S000002187]
#INFO:	BIOGRID	NEIGHBOUR:	SNF7	One	of	four	subunits	of	the	endosomal	sorting	complex	required	for	transport	III	(ESCRT-III);	involved	in	the	sorting	of	transmembrane	proteins	into	the	multivesicular	body	(MVB)	pathway;	recruited	from	the	cytoplasm	to	endosomal	membranes	[Source:SGD;Acc:S000004015]
#INFO:	BIOGRID	NEIGHBOUR:	GAL10	UDP-glucose-4-epimerase,	catalyzes	the	interconversion	of	UDP-galactose	and	UDP-D-glucose	in	galactose	metabolism;	also	catalyzes	the	conversion	of	alpha-D-glucose	or	alpha-D-galactose	to	their	beta-anomers	[Source:SGD;Acc:S000000223]
#INFO:	BIOGRID	NEIGHBOUR:	RPL4A	N-terminally	acetylated	protein	component	of	the	large	(60S)	ribosomal	subunit,	nearly	identical	to	Rpl4Bp	and	has	similarity	to	E.	coli	L4	and	rat	L4	ribosomal	proteins	[Source:SGD;Acc:S000000235]
#INFO:	BIOGRID	NEIGHBOUR:	SIT4	Type	2A-related	serine-threonine	phosphatase	that	functions	in	the	G1/S	transition	of	the	mitotic	cycle;	cytoplasmic	and	nuclear	protein	that	modulates	functions	mediated	by	Pkc1p	including	cell	wall	and	actin	cytoskeleton	organization	[Source:SGD;Acc:S000002205]
#INFO:	BIOGRID	NEIGHBOUR:	WBP1	Beta	subunit	of	the	oligosaccharyl	transferase	(OST)	glycoprotein	complex;	required	for	N-linked	glycosylation	of	proteins	in	the	endoplasmic	reticulum	[Source:SGD;Acc:S000000728]
#INFO:	BIOGRID	NEIGHBOUR:	RPN1	Non-ATPase	base	subunit	of	the	19S	regulatory	particle	of	the	26S	proteasome;	may	participate	in	the	recognition	of	several	ligands	of	the	proteasome;	contains	a	leucine-rich	repeat	(LRR)	domain,	a	site	for	protein-protein	interactions	[Source:SGD;Acc:S000001069]
#INFO:	BIOGRID	NEIGHBOUR:	SPB4	Putative	ATP-dependent	RNA	helicase,	nucleolar	protein	required	for	synthesis	of	60S	ribosomal	subunits	at	a	late	step	in	the	pathway;	sediments	with	66S	pre-ribosomes	in	sucrose	gradients	[Source:SGD;Acc:S000001894]
#INFO:	BIOGRID	NEIGHBOUR:	PAC1	Protein	involved	in	nuclear	migration,	part	of	the	dynein/dynactin	pathway;	targets	dynein	to	microtubule	tips,	which	is	necessary	for	sliding	of	microtubules	along	bud	cortex;	synthetic	lethal	with	bni1;	homolog	of	human	LIS1	[Source:SGD;Acc:S000005795]
#INFO:	BIOGRID	NEIGHBOUR:	SOP4	ER-membrane	protein;	suppressor	of	pma1-7,	deletion	of	SOP4	slows	down	the	export	of	wild-type	Pma1p	and	Pma1-7	from	the	ER	[Source:SGD;Acc:S000003728]
#INFO:	BIOGRID	NEIGHBOUR:	GET3	Guanine	nucleotide	exchange	factor	for	Gpa1p;	amplifies	G	protein	signaling;	subunit	of	the	GET	complex,	which	is	involved	in	Golgi	to	ER	trafficking	and	insertion	of	proteins	into	the	ER	membrane;	has	low-level	ATPase	activity	[Source:SGD;Acc:S000002258]
#INFO:	BIOGRID	NEIGHBOUR:	CPT1	Cholinephosphotransferase,	required	for	phosphatidylcholine	biosynthesis	and	for	inositol-dependent	regulation	of	EPT1	transcription	[Source:SGD;Acc:S000005074]
#INFO:	BIOGRID	NEIGHBOUR:	SSC1	Hsp70	family	ATPase,	constituent	of	the	import	motor	component	of	the	Translocase	of	the	Inner	Mitochondrial	membrane	(TIM23	complex);	involved	in	protein	translocation	and	folding;	subunit	of	SceI	endonuclease	[Source:SGD;Acc:S000003806]
#INFO:	BIOGRID	NEIGHBOUR:	GPD2	NAD-dependent	glycerol	3-phosphate	dehydrogenase,	homolog	of	Gpd1p,	expression	is	controlled	by	an	oxygen-independent	signaling	pathway	required	to	regulate	metabolism	under	anoxic	conditions;	located	in	cytosol	and	mitochondria	[Source:SGD;Acc:S000005420]
#INFO:	BIOGRID	NEIGHBOUR:	HTZ1	Histone	variant	H2AZ,	exchanged	for	histone	H2A	in	nucleosomes	by	the	SWR1	complex;	involved	in	transcriptional	regulation	through	prevention	of	the	spread	of	silent	heterochromatin	[Source:SGD;Acc:S000005372]
#INFO:	BIOGRID	NEIGHBOUR:	YJR085C	Putative	protein	of	unknown	function;	GFP-fusion	protein	is	induced	in	response	to	the	DNA-damaging	agent	MMS;	the	authentic,	non-tagged	protein	is	detected	in	highly	purified	mitochondria	in	high-throughput	studies	[Source:SGD;Acc:S000003845]
#INFO:	BIOGRID	NEIGHBOUR:	UBP13	Putative	ubiquitin	carboxyl-terminal	hydrolase,	ubiquitin-specific	protease	that	cleaves	ubiquitin-protein	fusions	[Source:SGD;Acc:S000000163]
#INFO:	BIOGRID	NEIGHBOUR:	RPL12B	Protein	component	of	the	large	(60S)	ribosomal	subunit,	nearly	identical	to	Rpl12Ap;	rpl12a	rpl12b	double	mutant	exhibits	slow	growth	and	slow	translation;	has	similarity	to	E.	coli	L11	and	rat	L12	ribosomal	proteins	[Source:SGD;Acc:S000002826]
#INFO:	BIOGRID	NEIGHBOUR:	NOP7	Component	of	several	different	pre-ribosomal	particles;	forms	a	complex	with	Ytm1p	and	Erb1p	that	is	required	for	maturation	of	the	large	ribosomal	subunit;	required	for	exit	from	G<sub>0</sub>	and	the	initiation	of	cell	proliferation	[Source:SGD;Acc:S000003335]
#INFO:	BIOGRID	NEIGHBOUR:	YIL156W-B	Putative	protein	of	unknown	function,	originally	identified	based	on	homology	to	<i>Ashbya	gossypii</i>	and	other	related	yeasts	[Source:SGD;Acc:S000028511]
#INFO:	BIOGRID	NEIGHBOUR:	VMA8	Subunit	D	of	the	eight-subunit	V1	peripheral	membrane	domain	of	the	vacuolar	H+-ATPase	(V-ATPase),	an	electrogenic	proton	pump	found	throughout	the	endomembrane	system;	plays	a	role	in	the	coupling	of	proton	transport	and	ATP	hydrolysis	[Source:SGD;Acc:S000000777]
#INFO:	BIOGRID	NEIGHBOUR:	COR1	Core	subunit	of	the	ubiquinol-cytochrome	c	reductase	complex	(bc1	complex),	which	is	a	component	of	the	mitochondrial	inner	membrane	electron	transport	chain	[Source:SGD;Acc:S000000141]
#INFO:	BIOGRID	NEIGHBOUR:	TEF2	Translational	elongation	factor	EF-1	alpha;	also	encoded	by	TEF1;	functions	in	the	binding	reaction	of	aminoacyl-tRNA	(AA-tRNA)	to	ribosomes;	may	also	have	a	role	in	tRNA	re-export	from	the	nucleus	[Source:SGD;Acc:S000000322]
#INFO:	BIOGRID	NEIGHBOUR:	ARX1	Shuttling	pre-60S	factor;	involved	in	the	biogenesis	of	ribosomal	large	subunit	biogenesis;	interacts	directly	with	Alb1;	responsible	for	Tif6	recycling	defects	in	absence	of	Rei1;	associated	with	the	ribosomal	export	complex	[Source:SGD;Acc:S000002508]
#INFO:	BIOGRID	NEIGHBOUR:	NHP6B	High-mobility	group	(HMG)	protein	that	binds	to	and	remodels	nucleosomes;	involved	in	recruiting	FACT	and	other	chromatin	remodelling	complexes	to	the	chromosomes;	functionally	redundant	with	Nhp6Ap;	homologous	to	mammalian	HMGB1	and	HMGB2	[Source:SGD;Acc:S000002157]
#INFO:	BIOGRID	NEIGHBOUR:	NAB2	Nuclear	polyadenylated	RNA-binding	protein	required	for	nuclear	mRNA	export	and	poly(A)	tail	length	control;	binds	nuclear	pore	protein	Mlp1p;	autoregulates	mRNA	levels;	related	to	human	hnRNPs;	nuclear	localization	sequence	binds	Kap104p	[Source:SGD;Acc:S000003090]
#INFO:	BIOGRID	NEIGHBOUR:	HRB1	Poly(A+)	RNA-binding	protein,	involved	in	the	export	of	mRNAs	from	the	nucleus	to	the	cytoplasm;	similar	to	Gbp2p	and	Npl3p	[Source:SGD;Acc:S000004949]
#INFO:	BIOGRID	NEIGHBOUR:	LSM1	Lsm	(Like	Sm)	protein;	forms	heteroheptameric	complex	(with	Lsm2p,	Lsm3p,	Lsm4p,	Lsm5p,	Lsm6p,	and	Lsm7p)	involved	in	degradation	of	cytoplasmic	mRNAs	[Source:SGD;Acc:S000003660]
#INFO:	BIOGRID	NEIGHBOUR:	RPT5	One	of	six	ATPases	of	the	19S	regulatory	particle	of	the	26S	proteasome	involved	in	the	degradation	of	ubiquitinated	substrates;	recruited	to	the	GAL1-10	promoter	region	upon	induction	of	transcription;	similar	to	human	TBP1	[Source:SGD;Acc:S000005643]
#INFO:	BIOGRID	NEIGHBOUR:	NDE2	Mitochondrial	external	NADH	dehydrogenase,	catalyzes	the	oxidation	of	cytosolic	NADH;	Nde1p	and	Nde2p	are	involved	in	providing	the	cytosolic	NADH	to	the	mitochondrial	respiratory	chain	[Source:SGD;Acc:S000002243]
#INFO:	BIOGRID	NEIGHBOUR:	RSM19	Mitochondrial	ribosomal	protein	of	the	small	subunit,	has	similarity	to	E.	coli	S19	ribosomal	protein	[Source:SGD;Acc:S000005320]
#INFO:	BIOGRID	NEIGHBOUR:	CYC1	Cytochrome	c,	isoform	1;	electron	carrier	of	the	mitochondrial	intermembrane	space	that	transfers	electrons	from	ubiquinone-cytochrome	c	oxidoreductase	to	cytochrome	c	oxidase	during	cellular	respiration	[Source:SGD;Acc:S000003809]
#INFO:	BIOGRID	NEIGHBOUR:	YNL208W	Protein	of	unknown	function;	may	interact	with	ribosomes,	based	on	co-purification	experiments;	authentic,	non-tagged	protein	is	detected	in	purified	mitochondria	in	high-throughput	studies;	potential	orthologs	found	in	other	fungi	[Source:SGD;Acc:S000005152]
#INFO:	BIOGRID	NEIGHBOUR:	HSP60	Tetradecameric	mitochondrial	chaperonin	required	for	ATP-dependent	folding	of	precursor	polypeptides	and	complex	assembly;	prevents	aggregation	and	mediates	protein	refolding	after	heat	shock;	role	in	mtDNA	transmission;	phosphorylated	[Source:SGD;Acc:S000004249]
#INFO:	BIOGRID	NEIGHBOUR:	PUF6	Pumilio-homology	domain	protein	that	binds	the	3'	UTR	of	ASH1	mRNA	and	represses	its	translation,	resulting	in	proper	asymmetric	localization	of	ASH1	mRNA;	also	co-sediments	with	the	60S	ribosomal	subunit	and	is	required	for	its	biogenesis	[Source:SGD;Acc:S000002904]
#INFO:	BIOGRID	NEIGHBOUR:	INH1	Protein	that	inhibits	ATP	hydrolysis	by	the	F1F0-ATP	synthase;	inhibitory	function	is	enhanced	by	stabilizing	proteins	Stf1p	and	Stf2p;	has	similarity	to	Stf1p;	has	a	calmodulin-binding	motif	and	binds	calmodulin	in	vitro	[Source:SGD;Acc:S000002340]
#INFO:	BIOGRID	NEIGHBOUR:	COX20	Mitochondrial	inner	membrane	protein,	required	for	proteolytic	processing	of	Cox2p	and	its	assembly	into	cytochrome	c	oxidase	[Source:SGD;Acc:S000002639]
#INFO:	BIOGRID	NEIGHBOUR:	OM45	Protein	of	unknown	function,	major	constituent	of	the	mitochondrial	outer	membrane;	located	on	the	outer	(cytosolic)	face	of	the	outer	membrane	[Source:SGD;Acc:S000001398]
#INFO:	BIOGRID	NEIGHBOUR:	PHO85	Cyclin-dependent	kinase,	with	ten	cyclin	partners;	involved	in	regulating	the	cellular	response	to	nutrient	levels	and	environmental	conditions	and	progression	through	the	cell	cycle	[Source:SGD;Acc:S000005952]
#INFO:	BIOGRID	NEIGHBOUR:	BCK1	Mitogen-activated	protein	(MAP)	kinase	kinase	kinase	acting	in	the	protein	kinase	C	signaling	pathway,	which	controls	cell	integrity;	upon	activation	by	Pkc1p	phosphorylates	downstream	kinases	Mkk1p	and	Mkk2p	[Source:SGD;Acc:S000003631]
#INFO:	BIOGRID	NEIGHBOUR:	VPS1	Dynamin-like	GTPase	required	for	vacuolar	sorting;	also	involved	in	actin	cytoskeleton	organization,	endocytosis,	late	Golgi-retention	of	some	proteins,	regulation	of	peroxisome	biogenesis	[Source:SGD;Acc:S000001709]
#INFO:	BIOGRID	NEIGHBOUR:	CKS1	Cyclin-dependent	protein	kinase	regulatory	subunit	and	adaptor;	modulates	proteolysis	of	M-phase	targets	through	interactions	with	the	proteasome;	role	in	transcriptional	regulation,	recruiting	proteasomal	subunits	to	target	gene	promoters	[Source:SGD;Acc:S000000339]
#INFO:	BIOGRID	NEIGHBOUR:	SPO75	Meiosis-specific	protein	of	unknown	function,	required	for	spore	wall	formation	during	sporulation;	dispensable	for	both	nuclear	divisions	during	meiosis	[Source:SGD;Acc:S000003928]
#INFO:	BIOGRID	NEIGHBOUR:	ERP3	Protein	with	similarity	to	Emp24p	and	Erv25p,	member	of	the	p24	family	involved	in	ER	to	Golgi	transport	[Source:SGD;Acc:S000002176]
#INFO:	BIOGRID	NEIGHBOUR:	THP3	Protein	that	forms	a	complex	with	Csn12p	that	is	recruited	to	transcribed	genes	and	may	have	a	role	in	transcription	elongation;	possibly	involved	in	splicing	based	on	pre-mRNA	accumulation	defect	for	many	intron-containing	genes	[Source:SGD;Acc:S000006249]
#INFO:	BIOGRID	NEIGHBOUR:	ACS2	Acetyl-coA	synthetase	isoform	which,	along	with	Acs1p,	is	the	nuclear	source	of	acetyl-coA	for	histone	acetylation;	mutants	affect	global	transcription;	required	for	growth	on	glucose;	expressed	under	anaerobic	conditions	[Source:SGD;Acc:S000004143]
#INFO:	BIOGRID	NEIGHBOUR:	YRA1	RNA	binding	protein	required	for	export	of	poly(A)+	mRNA	from	the	nucleus;	proposed	to	couple	mRNA	export	with	3'	end	processing	via	its	interactions	with	Mex67p	and	Pcf11p;	functionally	redundant	with	Yra2p,	another	REF	family	member	[Source:SGD;Acc:S000002789]
#INFO:	BIOGRID	NEIGHBOUR:	TOM20	Component	of	the	TOM	(translocase	of	outer	membrane)	complex	responsible	for	recognition	and	initial	import	steps	for	all	mitochondrially	directed	proteins;	acts	as	a	receptor	for	incoming	precursor	proteins	[Source:SGD;Acc:S000003314]
#INFO:	BIOGRID	NEIGHBOUR:	VPS52	Component	of	the	GARP	(Golgi-associated	retrograde	protein)	complex,	Vps51p-Vps52p-Vps53p-Vps54p,	which	is	required	for	the	recycling	of	proteins	from	endosomes	to	the	late	Golgi;	involved	in	localization	of	actin	and	chitin	[Source:SGD;Acc:S000002892]
#INFO:	BIOGRID	NEIGHBOUR:	YDR124W	Putative	protein	of	unknown	function;	non-essential	gene;	expression	is	strongly	induced	by	alpha	factor	[Source:SGD;Acc:S000002531]
#INFO:	BIOGRID	NEIGHBOUR:	YNL022C	Putative	cytosine	5-methyltransferase,	contains	seven	beta-strand	methyltransferase	motif	similar	to	NOP2/YNL061W;	green	fluorescent	protein	(GFP)-fusion	protein	localizes	to	the	nucleus;	predicted	to	be	involved	in	ribosome	biogenesis	[Source:SGD;Acc:S000004967]
#INFO:	BIOGRID	NEIGHBOUR:	DBP8	ATPase,	putative	RNA	helicase	of	the	DEAD-box	family;	component	of	90S	preribosome	complex	involved	in	production	of	18S	rRNA	and	assembly	of	40S	small	ribosomal	subunit;	ATPase	activity	stimulated	by	association	with	Esf2p	[Source:SGD;Acc:S000001212]
#INFO:	BIOGRID	NEIGHBOUR:	TSR1	Protein	required	for	processing	of	20S	pre-rRNA	in	the	cytoplasm;	associates	with	pre-40S	ribosomal	particles;	inhibits	the	premature	association	of	60S	subunits	with	assembling	40S	subunits	in	the	cytoplasm;	similar	to	Bms1p	[Source:SGD;Acc:S000002218]
#INFO:	BIOGRID	NEIGHBOUR:	SPO12	Nucleolar	protein	of	unknown	function,	positive	regulator	of	mitotic	exit;	involved	in	regulating	release	of	Cdc14p	from	the	nucleolus	in	early	anaphase,	may	play	similar	role	in	meiosis	[Source:SGD;Acc:S000001195]
#INFO:	BIOGRID	NEIGHBOUR:	RPL21A	Protein	component	of	the	large	(60S)	ribosomal	subunit,	nearly	identical	to	Rpl21Bp	and	has	similarity	to	rat	L21	ribosomal	protein	[Source:SGD;Acc:S000000395]
#INFO:	BIOGRID	NEIGHBOUR:	VPS24	One	of	four	subunits	of	the	endosomal	sorting	complex	required	for	transport	III	(ESCRT-III);	forms	an	ESCRT-III	subcomplex	with	Did4p;	involved	in	the	sorting	of	transmembrane	proteins	into	the	multivesicular	body	(MVB)	pathway	[Source:SGD;Acc:S000001524]
#INFO:	BIOGRID	NEIGHBOUR:	ATP15	Epsilon	subunit	of	the	F1	sector	of	mitochondrial	F1F0	ATP	synthase,	which	is	a	large,	evolutionarily	conserved	enzyme	complex	required	for	ATP	synthesis;	phosphorylated	[Source:SGD;Acc:S000006192]
#INFO:	BIOGRID	NEIGHBOUR:	RPS1B	Ribosomal	protein	10	(rp10)	of	the	small	(40S)	subunit;	nearly	identical	to	Rps1Ap	and	has	similarity	to	rat	S3a	ribosomal	protein	[Source:SGD;Acc:S000004528]
#INFO:	BIOGRID	NEIGHBOUR:	ZUO1	Ribosome-associated	chaperone,	functions	in	ribosome	biogenesis	and,	in	partnership	with	Ssz1p	and	SSb1/2,	as	a	chaperone	for	nascent	polypeptide	chains;	contains	a	DnaJ	domain	and	functions	as	a	J-protein	partner	for	Ssb1p	and	Ssb2p	[Source:SGD;Acc:S000003517]
#INFO:	BIOGRID	NEIGHBOUR:	TIM23	Essential	component	of	the	Translocase	of	the	Inner	Mitochondrial	membrane	(TIM23	complex);	involved	in	protein	import	into	mitochondrial	matrix	and	inner	membrane;	with	Tim17p,	contributes	to	architecture	and	function	of	the	import	channel	[Source:SGD;Acc:S000005300]
#INFO:	BIOGRID	NEIGHBOUR:	CSE4	Centromere	protein	that	resembles	histone	H3,	required	for	proper	kinetochore	function;	homolog	of	human	CENP-A;	levels	are	regulated	by	E3	ubiquitin	ligase	Psh1p	[Source:SGD;Acc:S000001532]
#INFO:	BIOGRID	NEIGHBOUR:	MOS1	Mitochondrial	protein	essential	for	proper	inner	membrane	organization;	conserved	component	of	the	mitochondrial	inner	membrane	organizing	system	(MICOS,	MINOS,	or	MitOS),	a	scaffold-like	structure	on	the	intermembrane	space	side	of	the	inner	membra	/.../ch	has	a	role	in	the	maintenance	of	crista	junctions	and	inner	membrane
#INFO:	BIOGRID	NEIGHBOUR:	COX1	Subunit	I	of	cytochrome	c	oxidase,	which	is	the	terminal	member	of	the	mitochondrial	inner	membrane	electron	transport	chain;	one	of	three	mitochondrially-encoded	subunits	[Source:SGD;Acc:S000007260]
#INFO:	BIOGRID	NEIGHBOUR:	RPL35B	Protein	component	of	the	large	(60S)	ribosomal	subunit,	identical	to	Rpl35Ap	and	has	similarity	to	rat	L35	ribosomal	protein	[Source:SGD;Acc:S000002295]
#INFO:	BIOGRID	NEIGHBOUR:	NOP16	Constituent	of	66S	pre-ribosomal	particles,	involved	in	60S	ribosomal	subunit	biogenesis	[Source:SGD;Acc:S000000804]
#INFO:	BIOGRID	NEIGHBOUR:	HYR1	Thiol	peroxidase	that	functions	as	a	hydroperoxide	receptor	to	sense	intracellular	hydroperoxide	levels	and	transduce	a	redox	signal	to	the	Yap1p	transcription	factor	[Source:SGD;Acc:S000001476]
#INFO:	BIOGRID	NEIGHBOUR:	IDH1	Subunit	of	mitochondrial	NAD(+)-dependent	isocitrate	dehydrogenase,	which	catalyzes	the	oxidation	of	isocitrate	to	alpha-ketoglutarate	in	the	TCA	cycle	[Source:SGD;Acc:S000004982]
#INFO:	BIOGRID	NEIGHBOUR:	NOG2	Putative	GTPase	that	associates	with	pre-60S	ribosomal	subunits	in	the	nucleolus	and	is	required	for	their	nuclear	export	and	maturation	[Source:SGD;Acc:S000005336]
#INFO:	BIOGRID	NEIGHBOUR:	ORM2	Evolutionarily	conserved	protein,	similar	to	Orm1p,	required	for	resistance	to	agents	that	induce	unfolded	protein	response;	Orm1p	and	Orm2p	together	control	membrane	biogenesis	by	coordinating	lipid	homeostasis	with	protein	quality	control	[Source:SGD;Acc:S000004342]
#INFO:	BIOGRID	NEIGHBOUR:	ERB1	Constituent	of	66S	pre-ribosomal	particles,	forms	a	complex	with	Nop7p	and	Ytm1p	that	is	required	for	maturation	of	the	large	ribosomal	subunit;	required	for	maturation	of	the	25S	and	5.8S	ribosomal	RNAs;	homologous	to	mammalian	Bop1	[Source:SGD;Acc:S000004652]
#INFO:	BIOGRID	NEIGHBOUR:	PET123	Mitochondrial	ribosomal	protein	of	the	small	subunit;	PET123	exhibits	genetic	interactions	with	PET122,	which	encodes	a	COX3	mRNA-specific	translational	activator	[Source:SGD;Acc:S000005684]
#INFO:	BIOGRID	NEIGHBOUR:	SBP1	Putative	RNA	binding	protein;	involved	in	translational	repression	and	found	in	cytoplasmic	P	bodies;	found	associated	with	small	nucleolar	RNAs	snR10	and	snR11	[Source:SGD;Acc:S000001026]
#INFO:	BIOGRID	NEIGHBOUR:	MTC1	Protein	of	unknown	function	that	may	interact	with	ribosomes;	green	fluorescent	protein	(GFP)-fusion	protein	localizes	to	the	cytoplasm	and	to	COPI-coated	vesicles	(early	Golgi);	mtc1	is	synthetically	lethal	with	cdc13-1	[Source:SGD;Acc:S000003659]
#INFO:	BIOGRID	NEIGHBOUR:	STP22	Component	of	the	ESCRT-I	complex,	which	is	involved	in	ubiquitin-dependent	sorting	of	proteins	into	the	endosome;	homologous	to	the	mouse	and	human	Tsg101	tumor	susceptibility	gene;	mutants	exhibit	a	Class	E	Vps	phenotype	[Source:SGD;Acc:S000000514]
#INFO:	BIOGRID	NEIGHBOUR:	RPL19B	Protein	component	of	the	large	(60S)	ribosomal	subunit,	nearly	identical	to	Rpl19Bp	and	has	similarity	to	rat	L19	ribosomal	protein;	rpl19a	and	rpl19b	single	null	mutations	result	in	slow	growth,	while	the	double	null	mutation	is	lethal	[Source:SGD;Acc:S000002156]
#INFO:	BIOGRID	NEIGHBOUR:	TOM40	Component	of	the	TOM	(translocase	of	outer	membrane)	complex	responsible	for	recognition	and	initial	import	steps	for	all	mitochondrially	directed	proteins;	constitutes	the	core	element	of	the	protein	conducting	pore	[Source:SGD;Acc:S000004816]
#INFO:	BIOGRID	NEIGHBOUR:	GPI8	ER	membrane	glycoprotein	subunit	of	the	glycosylphosphatidylinositol	transamidase	complex	that	adds	glycosylphosphatidylinositol	(GPI)	anchors	to	newly	synthesized	proteins;	human	PIG-K	protein	is	a	functional	homolog	[Source:SGD;Acc:S000002739]
#INFO:	BIOGRID	NEIGHBOUR:	MGR1	Subunit	of	the	mitochondrial	(mt)	i-AAA	protease	supercomplex,	which	degrades	misfolded	mitochondrial	proteins;	forms	a	subcomplex	with	Mgr3p	that	binds	to	substrates	to	facilitate	proteolysis;	required	for	growth	of	cells	lacking	mtDNA	[Source:SGD;Acc:S000000549]
#INFO:	BIOGRID	NEIGHBOUR:	COB	Cytochrome	b,	mitochondrially	encoded	subunit	of	the	ubiquinol-cytochrome	c	reductase	complex	which	includes	Cobp,	Rip1p,	Cyt1p,	Cor1p,	Qcr2p,	Qcr6p,	Qcr7p,	Qcr8p,	Qcr9p,	and	Qcr10p	[Source:SGD;Acc:S000007270]
#INFO:	BIOGRID	NEIGHBOUR:	SCS2	Integral	ER	membrane	protein	that	regulates	phospholipid	metabolism	via	an	interaction	with	the	FFAT	motif	of	Opi1p,	also	involved	in	telomeric	silencing,	disruption	causes	inositol	auxotrophy	above	34	degrees	C,	VAP	homolog	[Source:SGD;Acc:S000000922]
#INFO:	BIOGRID	NEIGHBOUR:	EFT1	Elongation	factor	2	(EF-2),	also	encoded	by	EFT1;	catalyzes	ribosomal	translocation	during	protein	synthesis;	contains	diphthamide,	the	unique	posttranslationally	modified	histidine	residue	specifically	ADP-ribosylated	by	diphtheria	toxin	[Source:SGD;Acc:S000002793]
#INFO:	BIOGRID	NEIGHBOUR:	SPC2	Subunit	of	signal	peptidase	complex	(Spc1p,	Spc2p,	Spc3p,	Sec11p),	which	catalyzes	cleavage	of	N-terminal	signal	sequences	of	proteins	targeted	to	the	secretory	pathway;	homologous	to	mammalian	SPC25	[Source:SGD;Acc:S000004519]
#INFO:	BIOGRID	NEIGHBOUR:	RPL12A	Protein	component	of	the	large	(60S)	ribosomal	subunit,	nearly	identical	to	Rpl12Ap;	rpl12a	rpl12b	double	mutant	exhibits	slow	growth	and	slow	translation;	has	similarity	to	E.	coli	L11	and	rat	L12	ribosomal	proteins	[Source:SGD;Acc:S000002826]
#INFO:	BIOGRID	NEIGHBOUR:	BNA3	Kynurenine	aminotransferase,	catalyzes	formation	of	kynurenic	acid	from	kynurenine;	potential	Cdc28p	substrate	[Source:SGD;Acc:S000003596]
#INFO:	BIOGRID	NEIGHBOUR:	RPS4B	Protein	component	of	the	small	(40S)	ribosomal	subunit;	mutation	affects	20S	pre-rRNA	processing;	identical	to	Rps4Bp	and	has	similarity	to	rat	S4	ribosomal	protein	[Source:SGD;Acc:S000003906]
#INFO:	BIOGRID	NEIGHBOUR:	VMA21	Integral	membrane	protein	that	is	required	for	vacuolar	H+-ATPase	(V-ATPase)	function,	although	not	an	actual	component	of	the	V-ATPase	complex;	functions	in	the	assembly	of	the	V-ATPase;	localized	to	the	yeast	endoplasmic	reticulum	(ER)	[Source:SGD;Acc:S000003337]
#INFO:	BIOGRID	NEIGHBOUR:	COS4	Protein	of	unknown	function,	member	of	the	DUP380	subfamily	of	conserved,	often	subtelomerically-encoded	proteins	[Source:SGD;Acc:S000001832]
#INFO:	BIOGRID	NEIGHBOUR:	SWP1	Delta	subunit	of	the	oligosaccharyl	transferase	glycoprotein	complex,	which	is	required	for	N-linked	glycosylation	of	proteins	in	the	endoplasmic	reticulum	[Source:SGD;Acc:S000004757]
#INFO:	BIOGRID	NEIGHBOUR:	RSM27	Mitochondrial	ribosomal	protein	of	the	small	subunit	[Source:SGD;Acc:S000003447]
#INFO:	BIOGRID	NEIGHBOUR:	REB1	RNA	polymerase	I	enhancer	binding	protein;	DNA	binding	protein	which	binds	to	genes	transcribed	by	both	RNA	polymerase	I	and	RNA	polymerase	II;	required	for	termination	of	RNA	polymerase	I	transcription	[Source:SGD;Acc:S000000253]
#INFO:	BIOGRID	NEIGHBOUR:	FIS1	Protein	involved	in	mitochondrial	membrane	fission	and	peroxisome	abundance;	required	for	localization	of	Dnm1p	and	Mdv1p	during	mitochondrial	division;	mediates	ethanol-induced	apoptosis	and	ethanol-induced	mitochondrial	fragmentation	[Source:SGD;Acc:S000001327]
#INFO:	BIOGRID	NEIGHBOUR:	POP5	Subunit	of	both	RNase	MRP	and	nuclear	RNase	P;	RNase	MRP	cleaves	pre-rRNA,	while	nuclear	RNase	P	cleaves	tRNA	precursors	to	generate	mature	5'	ends	and	facilitates	turnover	of	nuclear	RNAs	[Source:SGD;Acc:S000000031]
#INFO:	BIOGRID	NEIGHBOUR:	GBP2	Poly(A+)	RNA-binding	protein,	involved	in	the	export	of	mRNAs	from	the	nucleus	to	the	cytoplasm;	similar	to	Hrb1p	and	Npl3p;	also	binds	single-stranded	telomeric	repeat	sequence	in	vitro	[Source:SGD;Acc:S000000517]
#INFO:	BIOGRID	NEIGHBOUR:	MDM20	Non-catalytic	subunit	of	the	NatB	N-terminal	acetyltransferase,	which	catalyzes	N-acetylation	of	proteins	with	specific	N-terminal	sequences;	involved	in	mitochondrial	inheritance	and	actin	assembly	[Source:SGD;Acc:S000005436]
#INFO:	BIOGRID	NEIGHBOUR:	GLC7	Type	1	serine/threonine	protein	phosphatase	catalytic	subunit,	involved	in	many	processes	(eg:	glycogen	metabolism,	sporulation,	mitosis);	accumulates	at	mating	projections	by	interaction	with	Afr1p;	interacts	with	many	regulatory	subunits	[Source:SGD;Acc:S000000935]
#INFO:	BIOGRID	NEIGHBOUR:	TEF1	Translational	elongation	factor	EF-1	alpha;	also	encoded	by	TEF1;	functions	in	the	binding	reaction	of	aminoacyl-tRNA	(AA-tRNA)	to	ribosomes;	may	also	have	a	role	in	tRNA	re-export	from	the	nucleus	[Source:SGD;Acc:S000000322]
#INFO:	BIOGRID	NEIGHBOUR:	CDC42	Small	rho-like	GTPase,	essential	for	establishment	and	maintenance	of	cell	polarity;	mutants	have	defects	in	the	organization	of	actin	and	septins	[Source:SGD;Acc:S000004219]
#INFO:	BIOGRID	NEIGHBOUR:	NSG1	Protein	involved	in	regulation	of	sterol	biosynthesis;	specifically	stabilizes	Hmg2p,	one	of	two	HMG-CoA	isoenzymes	that	catalyze	the	rate-limiting	step	in	sterol	biosynthesis;	homolog	of	mammalian	INSIG	proteins	[Source:SGD;Acc:S000001175]
#INFO:	BIOGRID	NEIGHBOUR:	BRR6	Essential	nuclear	envelope	integral	membrane	protein	required	for	nuclear	envelope	morphology,	nuclear	pore	complex	localization,	nuclear	export;	exhibits	synthetic	lethal	genetic	interactions	with	genes	involved	in	lipid	metabolism	[Source:SGD;Acc:S000003216]
#INFO:	BIOGRID	NEIGHBOUR:	CDC3	Component	of	the	septin	ring	that	is	required	for	cytokinesis;	septins	are	GTP-binding	proteins	that	assemble	with	other	septins	into	rod-like	complexes	that	can	associate	with	other	rods	to	form	filament	polymers;	septin	rings	at	the	mother-bud	nec	/.../as	scaffolds	for	recruiting	factors	needed	for	cell
#INFO:	BIOGRID	NEIGHBOUR:	NOP1	Nucleolar	protein,	component	of	the	small	subunit	processome	complex,	which	is	required	for	processing	of	pre-18S	rRNA;	has	similarity	to	mammalian	fibrillarin	[Source:SGD;Acc:S000002172]
#INFO:	BIOGRID	NEIGHBOUR:	AAC1	Mitochondrial	inner	membrane	ADP/ATP	translocator,	exchanges	cytosolic	ADP	for	mitochondrially	synthesized	ATP;	phosphorylated;	Aac1p	is	a	minor	isoform	while	Pet9p	is	the	major	ADP/ATP	translocator	[Source:SGD;Acc:S000004660]
#INFO:	BIOGRID	NEIGHBOUR:	TPM1	Major	isoform	of	tropomyosin;	binds	to	and	stabilizes	actin	cables	and	filaments,	which	direct	polarized	cell	growth	and	the	distribution	of	several	organelles;	acetylated	by	the	NatB	complex	and	acetylated	form	binds	actin	most	efficiently	[Source:SGD;Acc:S000005023]
#INFO:	BIOGRID	NEIGHBOUR:	AAT2	Cytosolic	aspartate	aminotransferase,	involved	in	nitrogen	metabolism;	localizes	to	peroxisomes	in	oleate-grown	cells	[Source:SGD;Acc:S000004017]
#INFO:	BIOGRID	NEIGHBOUR:	PIL1	Primary	component	of	eisosomes,	which	are	large	immobile	cell	cortex	structures	associated	with	endocytosis;	null	mutants	show	activation	of	Pkc1p/Ypk1p	stress	resistance	pathways;	detected	in	phosphorylated	state	in	mitochondria;	member	of	the	BAR	/.../	family	[Source:SGD;Acc:S000003318]
#INFO:	BIOGRID	NEIGHBOUR:	RPL23A	Protein	component	of	the	large	(60S)	ribosomal	subunit,	identical	to	Rpl23Bp	and	has	similarity	to	E.	coli	L14	and	rat	L23	ribosomal	proteins	[Source:SGD;Acc:S000000183]
#INFO:	BIOGRID	NEIGHBOUR:	DPP1	Diacylglycerol	pyrophosphate	(DGPP)	phosphatase,	zinc-regulated	vacuolar	membrane-associated	lipid	phosphatase,	dephosphorylates	DGPP	to	phosphatidate	(PA)	and	Pi,	then	PA	to	diacylglycerol;	involved	in	lipid	signaling	and	cell	metabolism	[Source:SGD;Acc:S000002692]
#INFO:	BIOGRID	NEIGHBOUR:	RSM22	Mitochondrial	ribosomal	protein	of	the	small	subunit;	also	predicted	to	be	an	S-adenosylmethionine-dependent	methyltransferase	[Source:SGD;Acc:S000001638]
#INFO:	BIOGRID	NEIGHBOUR:	RRS1	Essential	protein	that	binds	ribosomal	protein	L11;	required	for	nuclear	export	of	the	60S	pre-ribosomal	subunit	during	ribosome	biogenesis;	localizes	to	the	nucleolus	and	in	foci	along	nuclear	periphery;	cooperates	with	Ebp2p	and	Mps3p	to	mediate	t	/.../e	clustering	by	binding	Sir4p,	but	is	not	involved
#INFO:	BIOGRID	NEIGHBOUR:	SIR3	Silencing	protein	that	interacts	with	Sir2p	and	Sir4p,	and	histone	H3	and	H4	tails,	to	establish	a	transcriptionally	silent	chromatin	state;	required	for	spreading	of	silenced	chromatin;	recruited	to	chromatin	through	interaction	with	Rap1p	[Source:SGD;Acc:S000004434]
#INFO:	BIOGRID	NEIGHBOUR:	RPG1	eIF3a	subunit	of	the	core	complex	of	translation	initiation	factor	3	(eIF3),	essential	for	translation;	part	of	a	Prt1p-Rpg1p-Nip1p	subcomplex	that	stimulates	binding	of	mRNA	and	tRNA(i)Met	to	ribosomes;	involved	in	translation	reinitiation	[Source:SGD;Acc:S000000283]
#INFO:	BIOGRID	NEIGHBOUR:	RPL20A	Protein	component	of	the	large	(60S)	ribosomal	subunit,	nearly	identical	to	Rpl20Bp	and	has	similarity	to	rat	L18a	ribosomal	protein	[Source:SGD;Acc:S000004855]
#INFO:	BIOGRID	NEIGHBOUR:	ACO1	Aconitase,	required	for	the	tricarboxylic	acid	(TCA)	cycle	and	also	independently	required	for	mitochondrial	genome	maintenance;	phosphorylated;	component	of	the	mitochondrial	nucleoid;	mutation	leads	to	glutamate	auxotrophy	[Source:SGD;Acc:S000004295]
#INFO:	BIOGRID	NEIGHBOUR:	POR1	Mitochondrial	porin	(voltage-dependent	anion	channel),	outer	membrane	protein	required	for	the	maintenance	of	mitochondrial	osmotic	stability	and	mitochondrial	membrane	permeability;	phosphorylated	[Source:SGD;Acc:S000005000]
#INFO:	BIOGRID	NEIGHBOUR:	TIM54	Component	of	the	mitochondrial	TIM22	complex	involved	in	insertion	of	polytopic	proteins	into	the	inner	membrane	[Source:SGD;Acc:S000003590]
#INFO:	BIOGRID	NEIGHBOUR:	ADE5,7	Bifunctional	enzyme	of	the	'de	novo'	purine	nucleotide	biosynthetic	pathway,	contains	aminoimidazole	ribotide	synthetase	and	glycinamide	ribotide	synthetase	activities	[Source:SGD;Acc:S000003203]
#INFO:	BIOGRID	NEIGHBOUR:	TIF35	eIF3g	subunit	of	the	core	complex	of	translation	initiation	factor	3	(eIF3),	which	is	essential	for	translation;	stimulates	resumption	of	ribosomal	scanning	during	translation	reinitiation	[Source:SGD;Acc:S000002837]
#INFO:	BIOGRID	NEIGHBOUR:	RSM7	Mitochondrial	ribosomal	protein	of	the	small	subunit,	has	similarity	to	E.	coli	S7	ribosomal	protein	[Source:SGD;Acc:S000003874]
#INFO:	BIOGRID	NEIGHBOUR:	YOR1	Plasma	membrane	ATP-binding	cassette	(ABC)	transporter,	multidrug	transporter	mediates	export	of	many	different	organic	anions	including	oligomycin;	similar	to	human	cystic	fibrosis	transmembrane	receptor	(CFTR)	[Source:SGD;Acc:S000003513]
#INFO:	BIOGRID	NEIGHBOUR:	HAP2	Subunit	of	the	heme-activated,	glucose-repressed	Hap2p/3p/4p/5p	CCAAT-binding	complex,	a	transcriptional	activator	and	global	regulator	of	respiratory	gene	expression;	contains	sequences	sufficient	for	both	complex	assembly	and	DNA	binding	[Source:SGD;Acc:S000003206]
#INFO:	BIOGRID	NEIGHBOUR:	ILM1	Protein	of	unknown	function;	may	be	involved	in	mitochondrial	DNA	maintenance;	required	for	slowed	DNA	synthesis-induced	filamentous	growth	[Source:SGD;Acc:S000003879]
#INFO:	BIOGRID	NEIGHBOUR:	SPT5	Protein	involved	in	regulating	Pol	I	and	Pol	II	transcription	and	pre-mRNA	processing;	forms	a	complex	with	Spt4p;	contains	a	C-terminal	repeat	domain	that	is	a	target	for	phosphorylation	by	Sgv1p	[Source:SGD;Acc:S000004470]
#INFO:	BIOGRID	NEIGHBOUR:	MSS116	DEAD-box	protein	required	for	efficient	splicing	of	mitochondrial	Group	I	and	II	introns;	non-polar	RNA	helicase	that	also	facilities	strand	annealing	[Source:SGD;Acc:S000002602]
#INFO:	BIOGRID	NEIGHBOUR:	DSN1	Essential	component	of	the	MIND	kinetochore	complex	(Mtw1p	Including	Nnf1p-Nsl1p-Dsn1p)	which	joins	kinetochore	subunits	contacting	DNA	to	those	contacting	microtubules;	important	for	chromosome	segregation	[Source:SGD;Acc:S000001449]
#INFO:	BIOGRID	NEIGHBOUR:	WTM1	Transcriptional	modulator	involved	in	regulation	of	meiosis,	silencing,	and	expression	of	RNR	genes;	required	for	nuclear	localization	of	the	ribonucleotide	reductase	small	subunit	Rnr2p	and	Rnr4p;	contains	WD	repeats	[Source:SGD;Acc:S000005756]
#INFO:	BIOGRID	NEIGHBOUR:	RPA49	RNA	polymerase	I	subunit	A49	[Source:SGD;Acc:S000005192]
#INFO:	BIOGRID	NEIGHBOUR:	RPL26A	Protein	component	of	the	large	(60S)	ribosomal	subunit,	nearly	identical	to	Rpl26Bp	and	has	similarity	to	E.	coli	L24	and	rat	L26	ribosomal	proteins;	binds	to	5.8S	rRNA	[Source:SGD;Acc:S000004336]
#INFO:	BIOGRID	NEIGHBOUR:	CPR3	Mitochondrial	peptidyl-prolyl	cis-trans	isomerase	(cyclophilin),	catalyzes	the	cis-trans	isomerization	of	peptide	bonds	N-terminal	to	proline	residues;	involved	in	protein	refolding	after	import	into	mitochondria	[Source:SGD;Acc:S000004543]
#INFO:	BIOGRID	NEIGHBOUR:	FAP7	Essential	NTPase	required	for	small	ribosome	subunit	synthesis,	mediates	processing	of	the	20S	pre-rRNA	at	site	D	in	the	cytoplasm	but	associates	only	transiently	with	43S	preribosomes	via	Rps14p,	may	be	the	endonuclease	for	site	D	[Source:SGD;Acc:S000002325]
#INFO:	BIOGRID	NEIGHBOUR:	RRP14	Essential	protein,	constituent	of	66S	pre-ribosomal	particles;	interacts	with	proteins	involved	in	ribosomal	biogenesis	and	cell	polarity;	member	of	the	SURF-6	family	[Source:SGD;Acc:S000001565]
#INFO:	BIOGRID	NEIGHBOUR:	CIT1	Citrate	synthase,	catalyzes	the	condensation	of	acetyl	coenzyme	A	and	oxaloacetate	to	form	citrate;	the	rate-limiting	enzyme	of	the	TCA	cycle;	nuclear	encoded	mitochondrial	protein	[Source:SGD;Acc:S000005284]
#INFO:	BIOGRID	NEIGHBOUR:	PDA1	E1	alpha	subunit	of	the	pyruvate	dehydrogenase	(PDH)	complex,	catalyzes	the	direct	oxidative	decarboxylation	of	pyruvate	to	acetyl-CoA;	phosphorylated;	regulated	by	glucose	[Source:SGD;Acc:S000000980]
#INFO:	BIOGRID	NEIGHBOUR:	RSM18	Mitochondrial	ribosomal	protein	of	the	small	subunit,	has	similarity	to	E.	coli	S18	ribosomal	protein	[Source:SGD;Acc:S000000852]
#INFO:	BIOGRID	NEIGHBOUR:	RPL6A	N-terminally	acetylated	protein	component	of	the	large	(60S)	ribosomal	subunit,	has	similarity	to	Rpl6Bp	and	to	rat	L6	ribosomal	protein;	binds	to	5.8S	rRNA	[Source:SGD;Acc:S000004538]
#INFO:	BIOGRID	NEIGHBOUR:	SSZ1	Hsp70	protein	that	interacts	with	Zuo1p	(a	DnaJ	homolog)	to	form	a	ribosome-associated	complex	that	binds	the	ribosome	via	the	Zuo1p	subunit;	also	involved	in	pleiotropic	drug	resistance	via	sequential	activation	of	PDR1	and	PDR5;	binds	ATP	[Source:SGD;Acc:S000001106]
#INFO:	BIOGRID	NEIGHBOUR:	TYW1	Iron-sulfer	protein	required	for	synthesis	of	Wybutosine	modified	tRNA;	Wybutosine	is	a	modified	guanosine	found	at	the	3'-position	adjacent	to	the	anticodon	of	phenylalanine	tRNA	which	supports	reading	frame	maintenance	by	stabilizing	codon-anticod	/.../eractions;	induction	by	Yap5p	in	response	to	iron	provides	protection	from	high	iron
#INFO:	BIOGRID	NEIGHBOUR:	RPS23B	Ribosomal	protein	28	(rp28)	of	the	small	(40S)	ribosomal	subunit,	required	for	translational	accuracy;	nearly	identical	to	Rps23Bp	and	similar	to	E.	coli	S12	and	rat	S23	ribosomal	proteins;	deletion	of	both	RPS23A	and	RPS23B	is	lethal	[Source:SGD;Acc:S000003350]
#INFO:	BIOGRID	NEIGHBOUR:	MSS51	Specific	translational	activator	for	the	mitochondrial	COX1	mRNA;	loosely	associated	with	the	matrix	face	of	the	mitochondrial	inner	membrane;	influences	both	COX1	mRNA	translation	and	Cox1p	assembly	into	cytochrome	c	oxidase	[Source:SGD;Acc:S000004193]
#INFO:	BIOGRID	NEIGHBOUR:	BRX1	Nucleolar	protein,	constituent	of	66S	pre-ribosomal	particles;	depletion	leads	to	defects	in	rRNA	processing	and	a	block	in	the	assembly	of	large	ribosomal	subunits;	possesses	a	sigma(70)-like	RNA-binding	motif	[Source:SGD;Acc:S000005437]
#INFO:	BIOGRID	NEIGHBOUR:	RPL16B	N-terminally	acetylated	protein	component	of	the	large	(60S)	ribosomal	subunit,	binds	to	5.8	S	rRNA;	has	similarity	to	Rpl16Ap,	E.	coli	L13	and	rat	L13a	ribosomal	proteins;	transcriptionally	regulated	by	Rap1p	[Source:SGD;Acc:S000005013]
#INFO:	BIOGRID	NEIGHBOUR:	CKA2	Alpha'	catalytic	subunit	of	casein	kinase	2	(CK2),	a	Ser/Thr	protein	kinase	with	roles	in	cell	growth	and	proliferation;	CK2,	comprised	of	CKA1,	CKA2,	CKB1	and	CKB2,	has	many	substrates	including	transcription	factors	and	all	RNA	polymerase	[Source:SGD;Acc:S000005587]
#INFO:	BIOGRID	NEIGHBOUR:	RPR2	Subunit	of	nuclear	RNase	P;	nuclear	RNase	P	cleaves	tRNA	precursors	to	generate	mature	5'	ends	and	facilitates	turnover	of	nuclear	RNAs;	not	shared	between	RNase	MRP	and	RNase	P,	in	contrast	to	all	other	RNase	P	protein	subunits	[Source:SGD;Acc:S000001454]
#INFO:	BIOGRID	NEIGHBOUR:	CKA1	Alpha	catalytic	subunit	of	casein	kinase	2	(CK2),	a	Ser/Thr	protein	kinase	with	roles	in	cell	growth	and	proliferation;	CK2,	comprised	of	CKA1,	CKA2,	CKB1	and	CKB2,	has	many	substrates	including	transcription	factors	and	all	RNA	polymerases	[Source:SGD;Acc:S000001297]
#INFO:	BIOGRID	NEIGHBOUR:	MRPS9	Mitochondrial	ribosomal	protein	of	the	small	subunit	[Source:SGD;Acc:S000000350]
#INFO:	BIOGRID	NEIGHBOUR:	YKE2	Subunit	of	the	heterohexameric	Gim/prefoldin	protein	complex	involved	in	the	folding	of	alpha-tubulin,	beta-tubulin,	and	actin	[Source:SGD;Acc:S000004190]
#INFO:	BIOGRID	NEIGHBOUR:	COX4	Subunit	IV	of	cytochrome	c	oxidase,	the	terminal	member	of	the	mitochondrial	inner	membrane	electron	transport	chain;	precursor	N-terminal	25	residues	are	cleaved	during	mitochondrial	import;	phosphorylated;	spermidine	enhances	translation	[Source:SGD;Acc:S000003155]
#INFO:	BIOGRID	NEIGHBOUR:	YVH1	Protein	phosphatase	involved	in	vegetative	growth	at	low	temperatures,	sporulation,	and	glycogen	accumulation;	mutants	are	defective	in	60S	ribosome	assembly;	member	of	the	dual-specificity	family	of	protein	phosphatases	[Source:SGD;Acc:S000001465]
#INFO:	BIOGRID	NEIGHBOUR:	RPL39	Protein	component	of	the	large	(60S)	ribosomal	subunit,	has	similarity	to	rat	L39	ribosomal	protein;	required	for	ribosome	biogenesis;	loss	of	both	Rpl31p	and	Rpl39p	confers	lethality;	also	exhibits	genetic	interactions	with	SIS1	and	PAB1	[Source:SGD;Acc:S000003725]
#INFO:	BIOGRID	NEIGHBOUR:	MUM2	Cytoplasmic	protein	essential	for	meiotic	DNA	replication	and	sporulation;	interacts	with	Orc2p,	which	is	a	component	of	the	origin	recognition	complex	[Source:SGD;Acc:S000000261]
#INFO:	BIOGRID	NEIGHBOUR:	LYS4	Homoaconitase,	catalyzes	the	conversion	of	homocitrate	to	homoisocitrate,	which	is	a	step	in	the	lysine	biosynthesis	pathway	[Source:SGD;Acc:S000002642]
#INFO:	BIOGRID	NEIGHBOUR:	MRP10	Mitochondrial	ribosomal	protein	of	the	small	subunit;	contains	twin	cysteine-x9-cysteine	motifs	[Source:SGD;Acc:S000006430]
#INFO:	BIOGRID	NEIGHBOUR:	NOT3	Subunit	of	the	CCR4-NOT	complex,	which	is	a	global	transcriptional	regulator	with	roles	in	transcription	initiation	and	elongation	and	in	mRNA	degradation	[Source:SGD;Acc:S000001300]
#INFO:	BIOGRID	NEIGHBOUR:	FYV4	Protein	of	unknown	function,	required	for	survival	upon	exposure	to	K1	killer	toxin	[Source:SGD;Acc:S000001101]
#INFO:	BIOGRID	NEIGHBOUR:	TIF6	Constituent	of	66S	pre-ribosomal	particles,	has	similarity	to	human	translation	initiation	factor	6	(eIF6);	may	be	involved	in	the	biogenesis	and	or	stability	of	60S	ribosomal	subunits	[Source:SGD;Acc:S000006220]
#INFO:	BIOGRID	NEIGHBOUR:	MDM10	Subunit	of	both	the	ERMES	complex	that	links	the	ER	to	mitochondria,	and	of	the	mitochondrial	sorting	and	assembly	machinery	(SAM	complex)	that	functions	in	import	and	assembly	of	outer	membrane	beta-barrel	proteins	[Source:SGD;Acc:S000000008]
#INFO:	BIOGRID	NEIGHBOUR:	VPS75	NAP	family	histone	chaperone;	binds	to	histones	and	Rtt109p,	stimulating	histone	acetyltransferase	activity;	possesses	nucleosome	assembly	activity	in	vitro;	proposed	role	in	vacuolar	protein	sorting	and	in	double-strand	break	repair	[Source:SGD;Acc:S000005190]
#INFO:	BIOGRID	NEIGHBOUR:	ADE17	Enzyme	of	'de	novo'	purine	biosynthesis	containing	both	5-aminoimidazole-4-carboxamide	ribonucleotide	transformylase	and	inosine	monophosphate	cyclohydrolase	activities,	isozyme	of	Ade16p;	ade16	ade17	mutants	require	adenine	and	histidine	[Source:SGD;Acc:S000004727]
#INFO:	BIOGRID	NEIGHBOUR:	MDM1	Intermediate	filament	protein,	required	for	nuclear	and	mitochondrial	transmission	to	daughter	buds;	contains	a	Phox	homology	(PX)	domain	and	specifically	binds	phosphatidylinositol	3-phosphate	(PtdIns-3-P)	[Source:SGD;Acc:S000004572]
#INFO:	BIOGRID	NEIGHBOUR:	RPF1	Nucleolar	protein	involved	in	the	assembly	and	export	of	the	large	ribosomal	subunit;	constituent	of	66S	pre-ribosomal	particles;	contains	a	sigma(70)-like	motif,	which	is	thought	to	bind	RNA	[Source:SGD;Acc:S000001130]
#INFO:	BIOGRID	NEIGHBOUR:	YMR31	Mitochondrial	ribosomal	protein	of	the	small	subunit,	has	similarity	to	human	mitochondrial	ribosomal	protein	MRP-S36	[Source:SGD;Acc:S000001945]
#INFO:	BIOGRID	NEIGHBOUR:	APL2	Beta-adaptin,	large	subunit	of	the	clathrin-associated	protein	(AP-1)	complex;	binds	clathrin;	involved	in	clathrin-dependent	Golgi	protein	sorting	[Source:SGD;Acc:S000001618]
#INFO:	BIOGRID	NEIGHBOUR:	TIM22	Essential	core	component	of	the	mitochondrial	TIM22	complex	involved	in	insertion	of	polytopic	proteins	into	the	inner	membrane;	forms	the	channel	through	which	proteins	are	imported	[Source:SGD;Acc:S000002376]
#INFO:	BIOGRID	NEIGHBOUR:	STT3	Subunit	of	the	oligosaccharyltransferase	complex	of	the	ER	lumen,	which	catalyzes	asparagine-linked	glycosylation	of	newly	synthesized	proteins;	forms	a	subcomplex	with	Ost3p	and	Ost4p	and	is	directly	involved	in	catalysis	[Source:SGD;Acc:S000002990]
#INFO:	BIOGRID	NEIGHBOUR:	GUT2	Mitochondrial	glycerol-3-phosphate	dehydrogenase;	expression	is	repressed	by	both	glucose	and	cAMP	and	derepressed	by	non-fermentable	carbon	sources	in	a	Snf1p,	Rsf1p,	Hap2/3/4/5	complex	dependent	manner	[Source:SGD;Acc:S000001417]
#INFO:	BIOGRID	NEIGHBOUR:	PGD1	Subunit	of	the	RNA	polymerase	II	mediator	complex;	associates	with	core	polymerase	subunits	to	form	the	RNA	polymerase	II	holoenzyme;	essential	for	basal	and	activated	transcription;	direct	target	of	Cyc8p-Tup1p	transcriptional	corepressor	[Source:SGD;Acc:S000002993]
#INFO:	BIOGRID	NEIGHBOUR:	YMR144W	Putative	protein	of	unknown	function;	localized	to	the	nucleus;	YMR144W	is	not	an	essential	gene	[Source:SGD;Acc:S000004752]
#INFO:	BIOGRID	NEIGHBOUR:	FMP37	Putative	protein	of	unknown	function;	highly	conserved	across	species	and	orthologous	to	human	gene	BRP44L;	the	authentic,	non-tagged	protein	is	detected	in	highly	purified	mitochondria	in	high-throughput	studies	[Source:SGD;Acc:S000003048]
#INFO:	BIOGRID	NEIGHBOUR:	ATP16	Delta	subunit	of	the	central	stalk	of	mitochondrial	F1F0	ATP	synthase,	which	is	a	large,	evolutionarily	conserved	enzyme	complex	required	for	ATP	synthesis;	phosphorylated	[Source:SGD;Acc:S000002162]
#INFO:	BIOGRID	NEIGHBOUR:	OST4	Subunit	of	the	oligosaccharyltransferase	complex	of	the	ER	lumen,	which	catalyzes	protein	asparagine-linked	glycosylation;	type	I	membrane	protein	required	for	incorporation	of	Ost3p	or	Ost6p	into	the	OST	complex	[Source:SGD;Acc:S000002391]
#INFO:	BIOGRID	NEIGHBOUR:	PMA1	Plasma	membrane	H+-ATPase,	pumps	protons	out	of	the	cell;	major	regulator	of	cytoplasmic	pH	and	plasma	membrane	potential;	P2-type	ATPase;	Hsp30p	plays	a	role	in	Pma1p	regulation;	interactions	with	Std1p	appear	to	propagate	[GAR+]	[Source:SGD;Acc:S000002976]
#INFO:	BIOGRID	NEIGHBOUR:	SRV2	CAP	(cyclase-associated	protein)	subunit	of	adenylyl	cyclase	complex;	N-terminus	binds	adenylyl	cyclase	and	facilitates	activation	by	RAS;	C-terminus	binds	ADP-actin	monomers,	facilitating	regulation	of	actin	dynamics	and	cell	morphogenesis	[Source:SGD;Acc:S000005082]
#INFO:	BIOGRID	NEIGHBOUR:	TSA1	Thioredoxin	peroxidase,	acts	as	both	a	ribosome-associated	and	free	cytoplasmic	antioxidant;	self-associates	to	form	a	high-molecular	weight	chaperone	complex	under	oxidative	stress;	deletion	results	in	mutator	phenotype	[Source:SGD;Acc:S000004490]
#INFO:	BIOGRID	NEIGHBOUR:	ATE1	Arginyl-tRNA-protein	transferase,	catalyzes	post-translational	conjugation	of	arginine	to	the	amino	termini	of	acceptor	proteins	which	are	then	subject	to	degradation	via	the	N-end	rule	pathway	[Source:SGD;Acc:S000002985]
#INFO:	BIOGRID	NEIGHBOUR:	AIM39	Putative	protein	of	unknown	function;	null	mutant	displays	elevated	frequency	of	mitochondrial	genome	loss	[Source:SGD;Acc:S000005414]
#INFO:	BIOGRID	NEIGHBOUR:	NOG1	Putative	GTPase	that	associates	with	free	60S	ribosomal	subunits	in	the	nucleolus	and	is	required	for	60S	ribosomal	subunit	biogenesis;	constituent	of	66S	pre-ribosomal	particles;	member	of	the	ODN	family	of	nucleolar	G-proteins	[Source:SGD;Acc:S000006014]
#INFO:	BIOGRID	NEIGHBOUR:	ERV29	Protein	localized	to	COPII-coated	vesicles,	involved	in	vesicle	formation	and	incorporation	of	specific	secretory	cargo	[Source:SGD;Acc:S000003516]
#INFO:	BIOGRID	NEIGHBOUR:	PGI1	Glycolytic	enzyme	phosphoglucose	isomerase,	catalyzes	the	interconversion	of	glucose-6-phosphate	and	fructose-6-phosphate;	required	for	cell	cycle	progression	and	completion	of	the	gluconeogenic	events	of	sporulation	[Source:SGD;Acc:S000000400]
#INFO:	BIOGRID	NEIGHBOUR:	NOP6	rRNA-binding	protein	required	for	40S	ribosomal	subunit	biogenesis;	contains	an	RNA	recognition	motif	(RRM)	and	has	similarity	to	hydrophilins;	NOP6	may	be	a	fungal-specific	gene	as	no	homologs	have	been	yet	identified	in	higher	eukaryotes	[Source:SGD;Acc:S000002372]
#INFO:	BIOGRID	NEIGHBOUR:	RPL26B	Protein	component	of	the	large	(60S)	ribosomal	subunit,	nearly	identical	to	Rpl26Ap	and	has	similarity	to	E.	coli	L24	and	rat	L26	ribosomal	proteins;	binds	to	5.8S	rRNA	[Source:SGD;Acc:S000003266]
#INFO:	BIOGRID	NEIGHBOUR:	YLR253W	Putative	protein	of	unknown	function;	the	authentic,	non-tagged	protein	is	detected	in	highly	purified	mitochondria	in	high-throughput	studies;	transcription	is	periodic	during	the	metabolic	cycle;	YLR253W	is	not	an	essential	gene	[Source:SGD;Acc:S000004243]
#INFO:	BIOGRID	NEIGHBOUR:	SUR2	Sphinganine	C4-hydroxylase,	catalyses	the	conversion	of	sphinganine	to	phytosphingosine	in	sphingolipid	biosyntheis	[Source:SGD;Acc:S000002705]
#INFO:	BIOGRID	NEIGHBOUR:	RPL19A	Protein	component	of	the	large	(60S)	ribosomal	subunit,	nearly	identical	to	Rpl19Bp	and	has	similarity	to	rat	L19	ribosomal	protein;	rpl19a	and	rpl19b	single	null	mutations	result	in	slow	growth,	while	the	double	null	mutation	is	lethal	[Source:SGD;Acc:S000002156]
#INFO:	BIOGRID	NEIGHBOUR:	HRD1	Ubiquitin-protein	ligase	required	for	endoplasmic	reticulum-associated	degradation	(ERAD)	of	misfolded	proteins;	genetically	linked	to	the	unfolded	protein	response	(UPR);	regulated	through	association	with	Hrd3p;	contains	an	H2	ring	finger	[Source:SGD;Acc:S000005373]
#INFO:	BIOGRID	NEIGHBOUR:	NAB3	Single	stranded	RNA	binding	protein;	subunit	of	Nrd1	complex	(Nrd1p-Nab3p-Sen1p);	acidic	ribonucleoprotein;	required	for	termination	of	non-poly(A)	transcripts	and	efficient	splicing	[Source:SGD;Acc:S000006111]
#INFO:	BIOGRID	NEIGHBOUR:	ANB1	Translation	elongation	factor	eIF-5A,	previously	thought	to	function	in	translation	initiation;	similar	to	and	functionally	redundant	with	Hyp2p;	undergoes	an	essential	hypusination	modification;	expressed	under	anaerobic	conditions	[Source:SGD;Acc:S000003808]
#INFO:	BIOGRID	NEIGHBOUR:	DIA2	Origin-binding	F-box	protein;	forms	an	SCF	ubiquitin	ligase	complex	with	Skp1p	and	Cdc53p;	plays	a	role	in	DNA	replication;	plays	a	role	in	transcription;	required	for	correct	assembly	of	RSC	complex,	correct	RSC-mediated	transcription	regulation,	a	/.../rect	nucleosome	positioning;	involved	in	invasive	and	pseudohyphal	growth	[Source:SGD;Acc:S000005606]
#INFO:	BIOGRID	NEIGHBOUR:	ACT1	Actin,	structural	protein	involved	in	cell	polarization,	endocytosis,	and	other	cytoskeletal	functions	[Source:SGD;Acc:S000001855]
#INFO:	BIOGRID	NEIGHBOUR:	CYR1	Adenylate	cyclase,	required	for	cAMP	production	and	cAMP-dependent	protein	kinase	signaling;	the	cAMP	pathway	controls	a	variety	of	cellular	processes,	including	metabolism,	cell	cycle,	stress	response,	stationary	phase,	and	sporulation	[Source:SGD;Acc:S000003542]
#INFO:	BIOGRID	NEIGHBOUR:	BUD27	Unconventional	prefoldin	protein	involved	in	translation	initiation;	mutants	have	inappropriate	expression	of	nutrient	sensitive	genes	due	to	translational	derepression	of	Gcn4p	transcription	factor;	diploid	mutants	show	random	budding	[Source:SGD;Acc:S000001871]
#INFO:	BIOGRID	NEIGHBOUR:	AIM24	Protein	of	unknown	function;	the	authentic,	non-tagged	protein	is	detected	in	purified	mitochondria	in	high-throughput	studies;	null	mutant	displays	reduced	respiratory	growth	and	elevated	frequency	of	mitochondrial	genome	loss	[Source:SGD;Acc:S000003841]
#INFO:	BIOGRID	NEIGHBOUR:	RRB1	Essential	nuclear	protein	involved	in	early	steps	of	ribosome	biogenesis;	physically	interacts	with	the	ribosomal	protein	Rpl3p	[Source:SGD;Acc:S000004738]
#INFO:	BIOGRID	NEIGHBOUR:	RPS6A	Protein	component	of	the	small	(40S)	ribosomal	subunit;	identical	to	Rps6Bp	and	has	similarity	to	rat	S6	ribosomal	protein	[Source:SGD;Acc:S000006011]
#INFO:	BIOGRID	NEIGHBOUR:	POP8	Subunit	of	both	RNase	MRP	and	nuclear	RNase	P;	RNase	MRP	cleaves	pre-rRNA,	while	nuclear	RNase	P	cleaves	tRNA	precursors	to	generate	mature	5'	ends	and	facilitates	turnover	of	nuclear	RNAs	[Source:SGD;Acc:S000000114]
#INFO:	BIOGRID	NEIGHBOUR:	RRP15	Nucleolar	protein,	constituent	of	pre-60S	ribosomal	particles;	required	for	proper	processing	of	the	27S	pre-rRNA	at	the	A3	and	B1	sites	to	yield	mature	5.8S	and	25S	rRNAs	[Source:SGD;Acc:S000006347]
#INFO:	BIOGRID	NEIGHBOUR:	ASK1	Essential	subunit	of	the	Dam1	complex	(aka	DASH	complex),	couples	kinetochores	to	the	force	produced	by	MT	depolymerization	thereby	aiding	in	chromosome	segregation;	phosphorylated	during	the	cell	cycle	by	cyclin-dependent	kinases	[Source:SGD;Acc:S000001535]
#INFO:	BIOGRID	NEIGHBOUR:	PRE6	Alpha	4	subunit	of	the	20S	proteasome;	may	replace	alpha	3	subunit	(Pre9p)	under	stress	conditions	to	create	a	more	active	proteasomal	isoform;	GFP-fusion	protein	relocates	from	cytosol	to	the	mitochondrial	surface	upon	oxidative	stress	[Source:SGD;Acc:S000005398]
#INFO:	BIOGRID	NEIGHBOUR:	TEA1	Ty1	enhancer	activator	required	for	full	levels	of	Ty	enhancer-mediated	transcription;	C6	zinc	cluster	DNA-binding	protein	[Source:SGD;Acc:S000005864]
#INFO:	BIOGRID	NEIGHBOUR:	ATP1	Alpha	subunit	of	the	F1	sector	of	mitochondrial	F1F0	ATP	synthase,	which	is	a	large,	evolutionarily	conserved	enzyme	complex	required	for	ATP	synthesis;	phosphorylated	[Source:SGD;Acc:S000000195]
#INFO:	BIOGRID	NEIGHBOUR:	EFT2	Elongation	factor	2	(EF-2),	also	encoded	by	EFT1;	catalyzes	ribosomal	translocation	during	protein	synthesis;	contains	diphthamide,	the	unique	posttranslationally	modified	histidine	residue	specifically	ADP-ribosylated	by	diphtheria	toxin	[Source:SGD;Acc:S000002793]
#INFO:	BIOGRID	NEIGHBOUR:	RPL13B	Protein	component	of	the	large	(60S)	ribosomal	subunit,	nearly	identical	to	Rpl13Ap;	not	essential	for	viability;	has	similarity	to	rat	L13	ribosomal	protein	[Source:SGD;Acc:S000004750]
#INFO:	BIOGRID	NEIGHBOUR:	ERG2	C-8	sterol	isomerase,	catalyzes	the	isomerization	of	the	delta-8	double	bond	to	the	delta-7	position	at	an	intermediate	step	in	ergosterol	biosynthesis	[Source:SGD;Acc:S000004815]
#INFO:	BIOGRID	NEIGHBOUR:	TEM1	GTP-binding	protein	of	the	ras	superfamily	involved	in	termination	of	M-phase;	controls	actomyosin	and	septin	dynamics	during	cytokinesis	[Source:SGD;Acc:S000004529]
#INFO:	BIOGRID	NEIGHBOUR:	KIN3	Nonessential	serine/threonine	protein	kinase;	possible	role	in	DNA	damage	response	[Source:SGD;Acc:S000000071]
#INFO:	BIOGRID	NEIGHBOUR:	HRR25	Protein	kinase	involved	in	regulating	diverse	events	including	vesicular	trafficking,	DNA	repair,	and	chromosome	segregation;	binds	the	CTD	of	RNA	pol	II;	homolog	of	mammalian	casein	kinase	1delta	(CK1delta)	[Source:SGD;Acc:S000006125]
#INFO:	BIOGRID	NEIGHBOUR:	SEY1	GTPase	with	a	role	in	ER	morphology;	interacts	physically	and	genetically	with	Yop1p	and	Rtn1p;	possible	functional	ortholog	of	mammalian	atlastins,	defects	in	which	cause	a	form	of	hereditary	spastic	paraplegia;	homolog	of	Arabidopsis	RHD3	[Source:SGD;Acc:S000005691]
#INFO:	BIOGRID	NEIGHBOUR:	YDR119W-A	Putative	protein	of	unknown	function;	may	interact	with	respiratory	chain	complexes	III	(ubiquinol-cytochrome	c	reductase)	or	IV	(cytochrome	c	oxidase)	[Source:SGD;Acc:S000113555]
#INFO:	BIOGRID	NEIGHBOUR:	LEU4	Alpha-isopropylmalate	synthase	(2-isopropylmalate	synthase);	the	main	isozyme	responsible	for	the	first	step	in	the	leucine	biosynthesis	pathway	[Source:SGD;Acc:S000005048]
#INFO:	BIOGRID	NEIGHBOUR:	ERG6	Delta(24)-sterol	C-methyltransferase,	converts	zymosterol	to	fecosterol	in	the	ergosterol	biosynthetic	pathway	by	methylating	position	C-24;	localized	to	both	lipid	particles	and	mitochondrial	outer	membrane	[Source:SGD;Acc:S000004467]
#INFO:	BIOGRID	NEIGHBOUR:	MRPS8	Mitochondrial	ribosomal	protein	of	the	small	subunit	[Source:SGD;Acc:S000004767]
#INFO:	BIOGRID	NEIGHBOUR:	MRP51	Mitochondrial	ribosomal	protein	of	the	small	subunit;	MRP51	exhibits	genetic	interactions	with	mutations	in	the	COX2	and	COX3	mRNA	5'-untranslated	leader	sequences	[Source:SGD;Acc:S000006039]
#INFO:	BIOGRID	NEIGHBOUR:	GGC1	Mitochondrial	GTP/GDP	transporter,	essential	for	mitochondrial	genome	maintenance;	has	a	role	in	mitochondrial	iron	transport;	member	of	the	mitochondrial	carrier	family	[Source:SGD;Acc:S000002357]
#INFO:	BIOGRID	NEIGHBOUR:	HAS1	ATP-dependent	RNA	helicase;	localizes	to	both	the	nuclear	periphery	and	nucleolus;	highly	enriched	in	nuclear	pore	complex	fractions;	constituent	of	66S	pre-ribosomal	particles	[Source:SGD;Acc:S000004903]
#INFO:	BIOGRID	NEIGHBOUR:	COX12	Subunit	VIb	of	cytochrome	c	oxidase,	which	is	the	terminal	member	of	the	mitochondrial	inner	membrane	electron	transport	chain;	required	for	assembly	of	cytochrome	c	oxidase	but	not	required	for	activity	after	assembly;	phosphorylated	[Source:SGD;Acc:S000004028]
#INFO:	BIOGRID	NEIGHBOUR:	MAM33	Acidic	protein	of	the	mitochondrial	matrix	involved	in	oxidative	phosphorylation;	related	to	the	human	complement	receptor	gC1q-R	[Source:SGD;Acc:S000001332]
#INFO:	BIOGRID	NEIGHBOUR:	GCY1	Putative	NADP(+)	coupled	glycerol	dehydrogenase,	proposed	to	be	involved	in	an	alternative	pathway	for	glycerol	catabolism;	also	has	mRNA	binding	activity;	member	of	the	aldo-keto	reductase	(AKR)	family	[Source:SGD;Acc:S000005646]
#INFO:	BIOGRID	NEIGHBOUR:	IRC3	Putative	RNA	helicase	of	the	DEAH/D-box	family;	null	mutant	displays	increased	levels	of	spontaneous	Rad52p	foci;	green	fluorescent	protein	(GFP)-fusion	protein	localizes	to	the	mitochondrion	[Source:SGD;Acc:S000002740]
#INFO:	BIOGRID	NEIGHBOUR:	ASF1	Nucleosome	assembly	factor,	involved	in	chromatin	assembly	and	disassembly,	anti-silencing	protein	that	causes	derepression	of	silent	loci	when	overexpressed;	plays	a	role	in	regulating	Ty1	transposition	[Source:SGD;Acc:S000003651]
#INFO:	BIOGRID	NEIGHBOUR:	YKL065W-A	Putative	protein	of	unknown	function	[Source:SGD;Acc:S000113563]
#INFO:	BIOGRID	NEIGHBOUR:	RRP17	Component	of	the	pre-60S	pre-ribosomal	particle;	required	for	cell	viability	under	standard	(aerobic)	conditions	but	not	under	anaerobic	conditions;	exonuclease	required	for	5&#8242;	end	processing	of	pre-60S	ribosomal	RNA	[Source:SGD;Acc:S000002820]
#INFO:	BIOGRID	NEIGHBOUR:	KGD2	Dihydrolipoyl	transsuccinylase,	component	of	the	mitochondrial	alpha-ketoglutarate	dehydrogenase	complex,	which	catalyzes	the	oxidative	decarboxylation	of	alpha-ketoglutarate	to	succinyl-CoA	in	the	TCA	cycle;	phosphorylated	[Source:SGD;Acc:S000002555]
#INFO:	BIOGRID	NEIGHBOUR:	HRT1	RING	finger	containing	subunit	of	Skp1-Cullin-F-box	ubiquitin	protein	ligases	(SCF);	required	for	Gic2p,	Far1p,	Sic1p	and	Cln2p	degradation;	may	tether	Cdc34p	(a	ubiquitin	conjugating	enzyme	or	E2)	and	Cdc53p	(a	cullin)	subunits	of	SCF	[Source:SGD;Acc:S000005493]
#INFO:	BIOGRID	NEIGHBOUR:	MUS81	Subunit	of	the	structure-specific	Mms4p-Mus81p	endonuclease	that	cleaves	branched	DNA;	involved	in	DNA	repair,	replication	fork	stability,	and	joint	molecule	formation/resolution	during	meiotic	recombination;	helix-hairpin-helix	protein	[Source:SGD;Acc:S000002794]
#INFO:	BIOGRID	NEIGHBOUR:	POP4	Subunit	of	both	RNase	MRP	and	nuclear	RNase	P;	RNase	MRP	cleaves	pre-rRNA,	while	nuclear	RNase	P	cleaves	tRNA	precursors	to	generate	mature	5'	ends	and	facilitates	turnover	of	nuclear	RNAs;	binds	to	the	RPR1	RNA	subunit	in	RNase	P	[Source:SGD;Acc:S000000461]
#INFO:	BIOGRID	NEIGHBOUR:	RSM26	Mitochondrial	ribosomal	protein	of	the	small	subunit	[Source:SGD;Acc:S000003862]
#INFO:	BIOGRID	NEIGHBOUR:	MNP1	Protein	associated	with	the	mitochondrial	nucleoid;	putative	mitochondrial	ribosomal	protein	with	similarity	to	E.	coli	L7/L12	ribosomal	protein;	required	for	normal	respiratory	growth	[Source:SGD;Acc:S000003036]
#INFO:	BIOGRID	NEIGHBOUR:	RPL30	Protein	component	of	the	large	(60S)	ribosomal	subunit,	has	similarity	to	rat	L30	ribosomal	protein;	involved	in	pre-rRNA	processing	in	the	nucleolus;	autoregulates	splicing	of	its	transcript	[Source:SGD;Acc:S000002998]
#INFO:	BIOGRID	NEIGHBOUR:	GFD2	Protein	of	unknown	function,	identified	as	a	high-copy	suppressor	of	a	dbp5	mutation	[Source:SGD;Acc:S000000541]
#INFO:	BIOGRID	NEIGHBOUR:	PHO88	Probable	membrane	protein,	involved	in	phosphate	transport;	pho88	pho86	double	null	mutant	exhibits	enhanced	synthesis	of	repressible	acid	phosphatase	at	high	inorganic	phosphate	concentrations	[Source:SGD;Acc:S000000310]
#INFO:	BIOGRID	NEIGHBOUR:	AIM19	Putative	protein	of	unknown	function;	the	authentic,	non-tagged	protein	is	detected	in	purified	mitochondria	in	high-throughput	studies;	null	mutant	displays	reduced	respiratory	growth	[Source:SGD;Acc:S000001349]
#INFO:	BIOGRID	NEIGHBOUR:	CST26	Protein	required	for	incorporation	of	stearic	acid	into	phosphatidylinositol;	affects	chromosome	stability	when	overexpressed	[Source:SGD;Acc:S000000246]
#INFO:	BIOGRID	NEIGHBOUR:	PRP19	Splicing	factor	associated	with	the	spliceosome;	contains	a	U-box,	a	motif	found	in	a	class	of	ubiquitin	ligases,	and	a	WD40	domain	[Source:SGD;Acc:S000003959]
#INFO:	BIOGRID	NEIGHBOUR:	SLC1	1-acyl-sn-glycerol-3-phosphate	acyltransferase,	catalyzes	the	acylation	of	lysophosphatidic	acid	to	form	phosphatidic	acid,	a	key	intermediate	in	lipid	metabolism;	enzymatic	activity	detected	in	lipid	particles	and	microsomes	[Source:SGD;Acc:S000002210]
#INFO:	BIOGRID	NEIGHBOUR:	RPL25	Primary	rRNA-binding	ribosomal	protein	component	of	the	large	(60S)	ribosomal	subunit,	has	similarity	to	E.	coli	L23	and	rat	L23a	ribosomal	proteins;	binds	to	25S	rRNA	via	a	conserved	C-terminal	motif	[Source:SGD;Acc:S000005487]
#INFO:	BIOGRID	NEIGHBOUR:	BI4	Mitochondrial	mRNA	maturase,	forms	a	complex	with	Nam2p	to	mediate	splicing	of	the	bI4	intron	of	the	COB	gene;	encoded	by	both	exon	and	intron	sequences	of	partially	processed	COB	mRNA	[Source:SGD;Acc:S000007273]
#INFO:	BIOGRID	NEIGHBOUR:	SDH3	Cytochrome	b	subunit	of	succinate	dehydrogenase	(Sdh1p,	Sdh2p,	Sdh3p,	Sdh4p),	which	couples	the	oxidation	of	succinate	to	the	transfer	of	electrons	to	ubiquinone	as	part	of	the	TCA	cycle	and	the	mitochondrial	respiratory	chain	[Source:SGD;Acc:S000001624]
#INFO:	BIOGRID	NEIGHBOUR:	RRP5	RNA	binding	protein	with	preference	for	single	stranded	tracts	of	U's	involved	in	synthesis	of	both	18S	and	5.8S	rRNAs;	component	of	both	the	ribosomal	small	subunit	(SSU)	processosome	and	the	90S	preribosome	[Source:SGD;Acc:S000004842]
#INFO:	BIOGRID	NEIGHBOUR:	ALO1	D-Arabinono-1,4-lactone	oxidase,	catalyzes	the	final	step	in	biosynthesis	of	dehydro-D-arabinono-1,4-lactone,	which	is	protective	against	oxidative	stress	[Source:SGD;Acc:S000004551]
#INFO:	BIOGRID	NEIGHBOUR:	SSA1	ATPase	involved	in	protein	folding	and	nuclear	localization	signal	(NLS)-directed	nuclear	transport;	member	of	heat	shock	protein	70	(HSP70)	family;	forms	a	chaperone	complex	with	Ydj1p;	localized	to	the	nucleus,	cytoplasm,	and	cell	wall;	0.98	identi	/.../th	Ssa2p,	but	subtle	differences	between	the	two	proteins	provide
#INFO:	BIOGRID	NEIGHBOUR:	CAB3	Subunit	of	a	phosphopantothenoylcysteine	decarboxylase	(PPCDC;	Cab3p,	Sis2p,	Vhs3p)	complex,	which	catalyzes	the	third	step	of	coenzyme	A	biosynthesis;	null	mutant	lethality	is	complemented	by	E.	coli	coaBC	[Source:SGD;Acc:S000001571]
#INFO:	BIOGRID	NEIGHBOUR:	CBP3	Mitochondrial	protein	required	for	assembly	of	cytochrome	bc1	complex;	forms	a	complex	with	Cbp6p	that	binds	to	mt	ribosomes	near	the	polypeptide	tunnel	exit	and	promotes	efficient	translation	of	the	COB	mRNA;	Cbp3p-Cbp6p	complex	also	interacts	with	/.../	synthesized	cytochrome	b	(Cobp)	and	Cbp4p	to	promote
#INFO:	BIOGRID	NEIGHBOUR:	CCT6	Subunit	of	the	cytosolic	chaperonin	Cct	ring	complex,	related	to	Tcp1p,	essential	protein	that	is	required	for	the	assembly	of	actin	and	tubulins	in	vivo;	contains	an	ATP-binding	motif	[Source:SGD;Acc:S000002596]
#INFO:	BIOGRID	NEIGHBOUR:	KRI1	Essential	nucleolar	protein	required	for	40S	ribosome	biogenesis;	physically	and	functionally	interacts	with	Krr1p	[Source:SGD;Acc:S000005252]
#INFO:	BIOGRID	NEIGHBOUR:	MNN4	Putative	positive	regulator	of	mannosylphosphate	transferase	(Mnn6p),	involved	in	mannosylphosphorylation	of	N-linked	oligosaccharides;	expression	increases	in	late-logarithmic	and	stationary	growth	phases	[Source:SGD;Acc:S000001684]
#INFO:	BIOGRID	NEIGHBOUR:	DNL4	DNA	ligase	required	for	nonhomologous	end-joining	(NHEJ),	forms	stable	heterodimer	with	required	cofactor	Lif1p,	interacts	with	Nej1p;	involved	in	meiosis,	not	essential	for	vegetative	growth	[Source:SGD;Acc:S000005531]
#INFO:	BIOGRID	NEIGHBOUR:	SBH1	Beta	subunit	of	the	Sec61p	ER	translocation	complex	(Sec61p-Sss1p-Sbh1p);	involved	in	protein	translocation	into	the	endoplasmic	reticulum;	interacts	with	the	exocyst	complex	and	also	with	Rtn1p;	homologous	to	Sbh2p	[Source:SGD;Acc:S000002128]
#INFO:	BIOGRID	NEIGHBOUR:	SDA1	Highly	conserved	nuclear	protein	required	for	actin	cytoskeleton	organization	and	passage	through	Start,	plays	a	critical	role	in	G1	events,	binds	Nap1p,	also	involved	in	60S	ribosome	biogenesis	[Source:SGD;Acc:S000003477]
#INFO:	BIOGRID	NEIGHBOUR:	IMD3	Inosine	monophosphate	dehydrogenase,	catalyzes	the	first	step	of	GMP	biosynthesis,	member	of	a	four-gene	family	in	S.	cerevisiae,	constitutively	expressed	[Source:SGD;Acc:S000004424]
#INFO:	BIOGRID	NEIGHBOUR:	RPL38	Protein	component	of	the	large	(60S)	ribosomal	subunit,	has	similarity	to	rat	L38	ribosomal	protein	[Source:SGD;Acc:S000004317]
#INFO:	BIOGRID	NEIGHBOUR:	UTP10	Nucleolar	protein,	component	of	the	small	subunit	(SSU)	processome	containing	the	U3	snoRNA	that	is	involved	in	processing	of	pre-18S	rRNA;	mutant	has	increased	aneuploidy	tolerance	[Source:SGD;Acc:S000003645]
#INFO:	BIOGRID	NEIGHBOUR:	HEM15	Ferrochelatase,	a	mitochondrial	inner	membrane	protein,	catalyzes	the	insertion	of	ferrous	iron	into	protoporphyrin	IX,	the	eighth	and	final	step	in	the	heme	biosynthetic	pathway	[Source:SGD;Acc:S000005702]
#INFO:	BIOGRID	NEIGHBOUR:	YKU70	Subunit	of	the	telomeric	Ku	complex	(Yku70p-Yku80p),	involved	in	telomere	length	maintenance,	structure	and	telomere	position	effect;	relocates	to	sites	of	double-strand	cleavage	to	promote	nonhomologous	end	joining	during	DSB	repair	[Source:SGD;Acc:S000004897]
#INFO:	BIOGRID	NEIGHBOUR:	RPL4B	Protein	component	of	the	large	(60S)	ribosomal	subunit,	nearly	identical	to	Rpl4Ap	and	has	similarity	to	E.	coli	L4	and	rat	L4	ribosomal	proteins	[Source:SGD;Acc:S000002419]
#INFO:	BIOGRID	NEIGHBOUR:	NUF2	Component	of	the	evolutionarily	conserved	kinetochore-associated	Ndc80	complex	(Ndc80p-Nuf2p-Spc24p-Spc25p);	involved	in	chromosome	segregation,	spindle	checkpoint	activity	and	kinetochore	clustering	[Source:SGD;Acc:S000005430]
#INFO:	BIOGRID	NEIGHBOUR:	ILV6	Regulatory	subunit	of	acetolactate	synthase,	which	catalyzes	the	first	step	of	branched-chain	amino	acid	biosynthesis;	enhances	activity	of	the	Ilv2p	catalytic	subunit,	localizes	to	mitochondria	[Source:SGD;Acc:S000000515]
#INFO:	BIOGRID	NEIGHBOUR:	VAM3	Syntaxin-like	vacuolar	t-SNARE	that	functions	with	Vam7p	in	vacuolar	protein	trafficking;	mediates	docking/fusion	of	late	transport	intermediates	with	the	vacuole;	has	an	acidic	di-leucine	sorting	signal	and	C-terminal	transmembrane	region	[Source:SGD;Acc:S000005632]
#INFO:	BIOGRID	NEIGHBOUR:	MKT1	Protein	that	forms	a	complex	with	Pbp1p	that	may	mediate	posttranscriptional	regulation	of	HO;	involved	in	propagation	of	M2	dsRNA	satellite	of	L-A	virus;	allelic	variation	affects	mitochondrial	genome	stability,	drug	resistance,	and	more	[Source:SGD;Acc:S000005029]
#INFO:	BIOGRID	NEIGHBOUR:	MID2	O-glycosylated	plasma	membrane	protein	that	acts	as	a	sensor	for	cell	wall	integrity	signaling	and	activates	the	pathway;	interacts	with	Rom2p,	a	guanine	nucleotide	exchange	factor	for	Rho1p,	and	with	cell	integrity	pathway	protein	Zeo1p	[Source:SGD;Acc:S000004324]
#INFO:	BIOGRID	NEIGHBOUR:	MEF1	Mitochondrial	elongation	factor	involved	in	translational	elongation	[Source:SGD;Acc:S000004059]
#INFO:	BIOGRID	NEIGHBOUR:	OST1	Alpha	subunit	of	the	oligosaccharyltransferase	complex	of	the	ER	lumen,	which	catalyzes	asparagine-linked	glycosylation	of	newly	synthesized	proteins	[Source:SGD;Acc:S000003539]
#INFO:	BIOGRID	NEIGHBOUR:	RAD10	Single-stranded	DNA	endonuclease	(with	Rad1p),	cleaves	single-stranded	DNA	during	nucleotide	excision	repair	and	double-strand	break	repair;	subunit	of	Nucleotide	Excision	Repair	Factor	1	(NEF1);	homolog	of	human	ERCC1	protein	[Source:SGD;Acc:S000004560]
#INFO:	BIOGRID	NEIGHBOUR:	SMC1	Subunit	of	the	multiprotein	cohesin	complex,	essential	protein	involved	in	chromosome	segregation	and	in	double-strand	DNA	break	repair;	SMC	chromosomal	ATPase	family	member,	binds	DNA	with	a	preference	for	DNA	with	secondary	structure	[Source:SGD;Acc:S000001886]
#INFO:	BIOGRID	NEIGHBOUR:	COA1	Mitochondrial	inner	membrane	protein	required	for	assembly	of	the	cytochrome	c	oxidase	complex	(complex	IV);	interacts	with	complex	IV	assembly	factor	Shy1p	during	the	early	stages	of	assembly	[Source:SGD;Acc:S000001419]
#INFO:	BIOGRID	NEIGHBOUR:	RPL16A	N-terminally	acetylated	protein	component	of	the	large	(60S)	ribosomal	subunit,	binds	to	5.8	S	rRNA;	has	similarity	to	Rpl16Bp,	E.	coli	L13	and	rat	L13a	ribosomal	proteins;	transcriptionally	regulated	by	Rap1p	[Source:SGD;Acc:S000001395]
#INFO:	BIOGRID	NEIGHBOUR:	DIF1	Protein	that	regulates	the	nuclear	localization	of	ribonucleotide	reductase	Rnr2p	and	Rnr4p	subunits;	phosphorylated	by	Dun1p	in	response	to	DNA	damage	and	degraded;	N-terminal	half	has	similarity	to	S.	pombe	Spd1	protein	[Source:SGD;Acc:S000004429]
#INFO:	BIOGRID	NEIGHBOUR:	SUI2	Alpha	subunit	of	the	translation	initiation	factor	eIF2,	involved	in	the	identification	of	the	start	codon;	phosphorylation	of	Ser51	is	required	for	regulation	of	translation	by	inhibiting	the	exchange	of	GDP	for	GTP	[Source:SGD;Acc:S000003767]
#INFO:	BIOGRID	NEIGHBOUR:	BUD20	Protein	involved	in	bud-site	selection;	diploid	mutants	display	a	random	budding	pattern	instead	of	the	wild-type	bipolar	pattern	[Source:SGD;Acc:S000004064]
#INFO:	BIOGRID	NEIGHBOUR:	WTM2	Transcriptional	modulator	involved	in	regulation	of	meiosis,	silencing,	and	expression	of	RNR	genes;	involved	in	response	to	replication	stress;	contains	WD	repeats	[Source:SGD;Acc:S000005755]
#INFO:	BIOGRID	NEIGHBOUR:	TIM11	Subunit	e	of	mitochondrial	F1F0-ATPase,	which	is	a	large,	evolutionarily	conserved	enzyme	complex	required	for	ATP	synthesis;	essential	for	the	dimeric	and	oligomeric	state	of	ATP	synthase	[Source:SGD;Acc:S000007255]
#INFO:	BIOGRID	NEIGHBOUR:	POP3	Subunit	of	both	RNase	MRP	and	nuclear	RNase	P;	RNase	MRP	cleaves	pre-rRNA,	while	nuclear	RNase	P	cleaves	tRNA	precursors	to	generate	mature	5'	ends	and	facilitates	turnover	of	nuclear	RNAs	[Source:SGD;Acc:S000005226]
#INFO:	BIOGRID	NEIGHBOUR:	SUR4	Elongase,	involved	in	fatty	acid	and	sphingolipid	biosynthesis;	synthesizes	very	long	chain	20-26-carbon	fatty	acids	from	C18-CoA	primers;	involved	in	regulation	of	sphingolipid	biosynthesis	[Source:SGD;Acc:S000004364]
#INFO:	BIOGRID	NEIGHBOUR:	FMP10	Putative	protein	of	unknown	function;	the	authentic,	non-tagged	protein	is	detected	in	highly	purified	mitochondria	in	high-throughput	studies	[Source:SGD;Acc:S000000984]
#INFO:	BIOGRID	NEIGHBOUR:	RPL17B	Protein	component	of	the	large	(60S)	ribosomal	subunit,	nearly	identical	to	Rpl17Ap	and	has	similarity	to	E.	coli	L22	and	rat	L17	ribosomal	proteins	[Source:SGD;Acc:S000003713]
#INFO:	BIOGRID	NEIGHBOUR:	TRK2	Component	of	the	Trk1p-Trk2p	potassium	transport	system	[Source:SGD;Acc:S000001758]
#INFO:	BIOGRID	NEIGHBOUR:	UTP15	Nucleolar	protein,	component	of	the	small	subunit	(SSU)	processome	containing	the	U3	snoRNA	that	is	involved	in	processing	of	pre-18S	rRNA	[Source:SGD;Acc:S000004699]
#INFO:	BIOGRID	NEIGHBOUR:	RPN10	Non-ATPase	base	subunit	of	the	19S	regulatory	particle	(RP)	of	the	26S	proteasome;	N-terminus	plays	a	role	in	maintaining	the	structural	integrity	of	the	RP;	binds	selectively	to	polyubiquitin	chains;	homolog	of	the	mammalian	S5a	protein	[Source:SGD;Acc:S000001243]
#INFO:	BIOGRID	NEIGHBOUR:	ATP18	Subunit	of	the	mitochondrial	F1F0	ATP	synthase,	which	is	a	large	enzyme	complex	required	for	ATP	synthesis;	termed	subunit	I	or	subunit	j;	does	not	correspond	to	known	ATP	synthase	subunits	in	other	organisms	[Source:SGD;Acc:S000007247]
#INFO:	BIOGRID	NEIGHBOUR:	CCP1	Mitochondrial	cytochrome-c	peroxidase;	degrades	reactive	oxygen	species	in	mitochondria,	involved	in	the	response	to	oxidative	stress	[Source:SGD;Acc:S000001774]
#INFO:	BIOGRID	NEIGHBOUR:	FRK1	Putative	protein	kinase;	similar	to	Kin4p;	green	fluorescent	protein	(GFP)-fusion	protein	localizes	to	the	cytoplasm;	interacts	with	rRNA	transcription	and	ribosome	biogenesis	factors	and	the	long	chain	fatty	acyl-CoA	synthetase	Faa3	[Source:SGD;Acc:S000006062]
#INFO:	BIOGRID	NEIGHBOUR:	GGA2	Protein	that	interacts	with	and	regulates	Arf1p	and	Arf2p	in	a	GTP-dependent	manner	to	facilitate	traffic	through	the	late	Golgi;	binds	phosphatidylinositol	4-phosphate,	which	plays	a	role	in	TGN	localization;	has	homology	to	gamma-adaptin	[Source:SGD;Acc:S000001150]
#INFO:	BIOGRID	NEIGHBOUR:	QCR2	Subunit	2	of	the	ubiquinol	cytochrome-c	reductase	complex,	which	is	a	component	of	the	mitochondrial	inner	membrane	electron	transport	chain;	phosphorylated;	transcription	is	regulated	by	Hap1p,	Hap2p/Hap3p,	and	heme	[Source:SGD;Acc:S000006395]
#INFO:	BIOGRID	NEIGHBOUR:	MPM1	Mitochondrial	membrane	protein	of	unknown	function,	contains	no	hydrophobic	stretches	[Source:SGD;Acc:S000003602]
#INFO:	BIOGRID	NEIGHBOUR:	CBF5	Pseudouridine	synthase	catalytic	subunit	of	box	H/ACA	small	nucleolar	ribonucleoprotein	particles	(snoRNPs),	acts	on	both	large	and	small	rRNAs	and	on	snRNA	U2;	mutations	in	human	ortholog	dyskerin	cause	the	disorder	dyskeratosis	congenita	[Source:SGD;Acc:S000004165]
#INFO:	BIOGRID	NEIGHBOUR:	MRT4	Protein	involved	in	mRNA	turnover	and	ribosome	assembly,	localizes	to	the	nucleolus	[Source:SGD;Acc:S000001492]
#INFO:	BIOGRID	NEIGHBOUR:	POL12	B	subunit	of	DNA	polymerase	alpha-primase	complex,	required	for	initiation	of	DNA	replication	during	mitotic	and	premeiotic	DNA	synthesis;	also	functions	in	telomere	capping	and	length	regulation	[Source:SGD;Acc:S000000131]
#INFO:	BIOGRID	NEIGHBOUR:	SWD1	Subunit	of	the	COMPASS	(Set1C)	complex,	which	methylates	histone	H3	on	lysine	4	and	is	required	in	transcriptional	silencing	near	telomeres;	WD40	beta	propeller	superfamily	member	with	similarity	to	mammalian	Rbbp7	[Source:SGD;Acc:S000000064]
#INFO:	BIOGRID	NEIGHBOUR:	CYC7	Cytochrome	c	isoform	2,	expressed	under	hypoxic	conditions;	electron	carrier	of	the	mitochondrial	intermembrane	space	that	transfers	electrons	from	ubiquinone-cytochrome	c	oxidoreductase	to	cytochrome	c	oxidase	during	cellular	respiration	[Source:SGD;Acc:S000000765]
#INFO:	BIOGRID	NEIGHBOUR:	MOT3	Nuclear	transcription	factor	with	two	Cys2-His2	zinc	fingers;	involved	in	repression	of	a	subset	of	hypoxic	genes	by	Rox1p,	repression	of	several	DAN/TIR	genes	during	aerobic	growth,	and	repression	of	ergosterol	biosynthetic	genes;	can	form	the	[MOT	/.../ion	[Source:SGD;Acc:S000004674]
#INFO:	BIOGRID	NEIGHBOUR:	LAC1	Ceramide	synthase	component,	involved	in	synthesis	of	ceramide	from	C26(acyl)-coenzyme	A	and	dihydrosphingosine	or	phytosphingosine,	functionally	equivalent	to	Lag1p	[Source:SGD;Acc:S000001491]
#INFO:	BIOGRID	NEIGHBOUR:	MAM3	Protein	required	for	normal	mitochondrial	morphology,	has	similarity	to	hemolysins	[Source:SGD;Acc:S000005421]
#INFO:	BIOGRID	NEIGHBOUR:	RPL40B	Fusion	protein,	identical	to	Rpl40Bp,	that	is	cleaved	to	yield	ubiquitin	and	a	ribosomal	protein	of	the	large	(60S)	ribosomal	subunit	with	similarity	to	rat	L40;	ubiquitin	may	facilitate	assembly	of	the	ribosomal	protein	into	ribosomes	[Source:SGD;Acc:S000001410]
#INFO:	BIOGRID	NEIGHBOUR:	ERG28	Endoplasmic	reticulum	membrane	protein,	may	facilitate	protein-protein	interactions	between	the	Erg26p	dehydrogenase	and	the	Erg27p	3-ketoreductase	and/or	tether	these	enzymes	to	the	ER,	also	interacts	with	Erg6p	[Source:SGD;Acc:S000000846]
#INFO:	BIOGRID	NEIGHBOUR:	IPI3	Essential	component	of	the	Rix1	complex	(Rix1p,	Ipi1p,	Ipi3p)	that	is	required	for	processing	of	ITS2	sequences	from	35S	pre-rRNA;	highly	conserved	and	contains	WD40	motifs;	Rix1	complex	associates	with	Mdn1p	in	pre-60S	ribosomal	particles	[Source:SGD;Acc:S000005126]
#INFO:	BIOGRID	NEIGHBOUR:	RPS24A	Protein	component	of	the	small	(40S)	ribosomal	subunit;	identical	to	Rps24Bp	and	has	similarity	to	rat	S24	ribosomal	protein	[Source:SGD;Acc:S000000876]
#INFO:	BIOGRID	NEIGHBOUR:	ATP4	Subunit	b	of	the	stator	stalk	of	mitochondrial	F1F0	ATP	synthase,	which	is	a	large,	evolutionarily	conserved	enzyme	complex	required	for	ATP	synthesis;	contributes	to	the	oligomerization	of	the	complex;	phosphorylated	[Source:SGD;Acc:S000005999]
#INFO:	BIOGRID	NEIGHBOUR:	UBP3	Ubiquitin-specific	protease	involved	in	transport	and	osmotic	response;	interacts	with	Bre5p	to	co-regulate	anterograde	and	retrograde	transport	between	the	ER	and	Golgi;	involved	in	transcription	elongation	in	response	to	osmostress	through	phospho	/.../on	at	Ser695	by	Hog1p;	inhibitor	of	gene	silencing;	cleaves	ubiquitin	fusions	but	not
#INFO:	BIOGRID	NEIGHBOUR:	SSB2	Cytoplasmic	ATPase	that	is	a	ribosome-associated	molecular	chaperone,	functions	with	J-protein	partner	Zuo1p;	may	be	involved	in	the	folding	of	newly-synthesized	polypeptide	chains;	member	of	the	HSP70	family;	homolog	of	SSB1	[Source:SGD;Acc:S000005153]
#INFO:	BIOGRID	NEIGHBOUR:	RPN8	Essential,	non-ATPase	regulatory	subunit	of	the	26S	proteasome;	has	similarity	to	the	human	p40	proteasomal	subunit	and	to	another	S.	cerevisiae	regulatory	subunit,	Rpn11p	[Source:SGD;Acc:S000005787]
#INFO:	BIOGRID	NEIGHBOUR:	SSD1	Translational	repressor	with	a	role	in	polar	growth	and	wall	integrity;	regulated	by	Cbk1p	phosphorylation	to	effect	bud-specific	translational	control	and	localization	of	specific	mRNAs;	interacts	with	TOR	pathway	components;	contains	a	functional	/.../inal	nuclear	localization	sequence	and	nucleocytoplasmic	shuttling	appears	to	be	critical	to	Ssd1p
#INFO:	BIOGRID	NEIGHBOUR:	RIX1	Essential	component	of	the	Rix1	complex	(Rix1p,	Ipi1p,	Ipi3p)	that	is	required	for	processing	of	ITS2	sequences	from	35S	pre-rRNA;	Rix1	complex	associates	with	Mdn1p	in	pre-60S	ribosomal	particles	[Source:SGD;Acc:S000001240]
#INFO:	BIOGRID	NEIGHBOUR:	OST3	Gamma	subunit	of	the	oligosaccharyltransferase	complex	of	the	ER	lumen,	which	catalyzes	asparagine-linked	glycosylation	of	newly	synthesized	proteins;	Ost3p	is	important	for	N-glycosylation	of	a	subset	of	proteins	[Source:SGD;Acc:S000005611]
#INFO:	BIOGRID	NEIGHBOUR:	MMM1	ER	integral	membrane	protein,	component	of	the	ERMES	complex	that	links	the	ER	to	mitochondria	and	may	promote	inter-organellar	calcium	and	phospholipid	exchange	as	well	as	coordinating	mitochondrial	DNA	replication	and	growth	[Source:SGD;Acc:S000003929]
#INFO:	BIOGRID	NEIGHBOUR:	ENP1	Protein	associated	with	U3	and	U14	snoRNAs,	required	for	pre-rRNA	processing	and	40S	ribosomal	subunit	synthesis;	localized	in	the	nucleus	and	concentrated	in	the	nucleolus	[Source:SGD;Acc:S000000451]
#INFO:	BIOGRID	NEIGHBOUR:	SCO1	Copper-binding	protein	of	the	mitochondrial	inner	membrane,	required	for	cytochrome	c	oxidase	activity	and	respiration;	may	function	to	deliver	copper	to	cytochrome	c	oxidase;	has	similarity	to	thioredoxins	[Source:SGD;Acc:S000000241]
#INFO:	BIOGRID	NEIGHBOUR:	RNR4	Ribonucleotide-diphosphate	reductase	(RNR),	small	subunit;	the	RNR	complex	catalyzes	the	rate-limiting	step	in	dNTP	synthesis	and	is	regulated	by	DNA	replication	and	DNA	damage	checkpoint	pathways	via	localization	of	the	small	subunits	[Source:SGD;Acc:S000003412]
#INFO:	BIOGRID	NEIGHBOUR:	AIM38	Putative	protein	of	unknown	function;	non-tagged	protein	is	detected	in	purified	mitochondria;	may	interact	with	respiratory	chain	complex	IV;	null	mutant	is	viable	and	displays	reduced	frequency	of	mitochondrial	genome	loss	[Source:SGD;Acc:S000005301]
#INFO:	BIOGRID	NEIGHBOUR:	SSO1	Plasma	membrane	t-SNARE	involved	in	fusion	of	secretory	vesicles	at	the	plasma	membrane	and	in	vesicle	fusion	during	sporulation;	forms	a	complex	with	Sec9p	that	binds	v-SNARE	Snc2p;	syntaxin	homolog;	functionally	redundant	with	Sso2p	[Source:SGD;Acc:S000006153]
#INFO:	BIOGRID	NEIGHBOUR:	RPS30B	Protein	component	of	the	small	(40S)	ribosomal	subunit;	nearly	identical	to	Rps30Ap	and	has	similarity	to	rat	S30	ribosomal	protein	[Source:SGD;Acc:S000005708]
#INFO:	BIOGRID	NEIGHBOUR:	ATP3	Gamma	subunit	of	the	F1	sector	of	mitochondrial	F1F0	ATP	synthase,	which	is	a	large,	evolutionarily	conserved	enzyme	complex	required	for	ATP	synthesis	[Source:SGD;Acc:S000000243]
#INFO:	BIOGRID	NEIGHBOUR:	RSM28	Mitochondrial	ribosomal	protein	of	the	small	subunit;	genetic	interactions	suggest	a	possible	role	in	promoting	translation	initiation	[Source:SGD;Acc:S000002902]
#INFO:	BIOGRID	NEIGHBOUR:	TSC11	Subunit	of	TORC2	(Tor2p-Lst8p-Avo1-Avo2-Tsc11p-Bit61p),	a	membrane-associated	complex	that	regulates	actin	cytoskeletal	dynamics	during	polarized	growth	and	cell	wall	integrity;	involved	in	sphingolipid	metabolism;	contains	a	RasGEFN	domain	[Source:SGD;Acc:S000000895]
#INFO:	BIOGRID	NEIGHBOUR:	PHO4	Basic	helix-loop-helix	(bHLH)	transcription	factor	of	the	myc-family;	activates	transcription	cooperatively	with	Pho2p	in	response	to	phosphate	limitation;	binding	to	'CACGTG'	motif	is	regulated	by	chromatin	restriction,	competitive	binding	of	Cbf1p	/.../e	same	DNA	binding	motif	and	cooperation	with	Pho2p,;	function	is	regulated	by	phosphorylation	at
#INFO:	BIOGRID	NEIGHBOUR:	HRD3	Resident	protein	of	the	ER	membrane	that	plays	a	central	role	in	ER-associated	protein	degradation	(ERAD),	forms	HRD	complex	with	Hrd1p	and	ERAD	determinants	that	engages	in	lumen	to	cytosol	communication	and	coordination	of	ERAD	events	[Source:SGD;Acc:S000004197]
#INFO:	BIOGRID	NEIGHBOUR:	SPC24	Component	of	the	evolutionarily	conserved	kinetochore-associated	Ndc80	complex	(Ndc80p-Nuf2p-Spc24p-Spc25p);	involved	in	chromosome	segregation,	spindle	checkpoint	activity	and	kinetochore	clustering	[Source:SGD;Acc:S000004723]
#INFO:	BIOGRID	NEIGHBOUR:	TMA7	Protein	of	unknown	that	associates	with	ribosomes;	null	mutant	exhibits	translation	defects,	altered	polyribosome	profiles,	and	resistance	to	the	translation	inhibitor	anisomcyin	[Source:SGD;Acc:S000007246]
#INFO:	BIOGRID	NEIGHBOUR:	RPS7B	Protein	component	of	the	small	(40S)	ribosomal	subunit,	nearly	identical	to	Rps7Ap;	interacts	with	Kti11p;	deletion	causes	hypersensitivity	to	zymocin;	has	similarity	to	rat	S7	and	Xenopus	S8	ribosomal	proteins	[Source:SGD;Acc:S000005040]
#INFO:	BIOGRID	NEIGHBOUR:	SAC1	Phosphatidylinositol	phosphate	(PtdInsP)	phosphatase	involved	in	hydrolysis	of	PtdIns[4]P;	transmembrane	protein	localizes	to	ER	and	Golgi;	involved	in	protein	trafficking	and	processing,	secretion,	and	cell	wall	maintenance	[Source:SGD;Acc:S000001695]
#INFO:	BIOGRID	NEIGHBOUR:	ATP17	Subunit	f	of	the	F0	sector	of	mitochondrial	F1F0	ATP	synthase,	which	is	a	large,	evolutionarily	conserved	enzyme	complex	required	for	ATP	synthesis	[Source:SGD;Acc:S000002785]
#INFO:	BIOGRID	NEIGHBOUR:	SIS2	Negative	regulatory	subunit	of	protein	phosphatase	1	Ppz1p	and	also	a	subunit	of	the	phosphopantothenoylcysteine	decarboxylase	(PPCDC;	Cab3p,	Sis2p,	Vhs3p)	complex,	which	catalyzes	the	third	step	of	coenzyme	A	biosynthesis	[Source:SGD;Acc:S000001780]
#INFO:	BIOGRID	NEIGHBOUR:	PRT1	eIF3b	subunit	of	the	core	complex	of	translation	initiation	factor	3	(eIF3),	essential	for	translation;	part	of	a	subcomplex	(Prt1p-Rpg1p-Nip1p)	that	stimulates	binding	of	mRNA	and	tRNA(i)Met	to	ribosomes	[Source:SGD;Acc:S000005888]
#INFO:	BIOGRID	NEIGHBOUR:	GAR1	Protein	component	of	the	H/ACA	snoRNP	pseudouridylase	complex,	involved	in	the	modification	and	cleavage	of	the	18S	pre-rRNA	[Source:SGD;Acc:S000001131]
#INFO:	BIOGRID	NEIGHBOUR:	RPF2	Essential	protein	involved	in	the	processing	of	pre-rRNA	and	the	assembly	of	the	60S	ribosomal	subunit;	interacts	with	ribosomal	protein	L11;	localizes	predominantly	to	the	nucleolus;	constituent	of	66S	pre-ribosomal	particles	[Source:SGD;Acc:S000001789]
#INFO:	BIOGRID	NEIGHBOUR:	VHS3	Negative	regulatory	subunit	of	protein	phosphatase	1	Ppz1p	and	also	a	subunit	of	the	phosphopantothenoylcysteine	decarboxylase	(PPCDC;	Cab3p,	Sis2p,	Vhs3p)	complex,	which	catalyzes	the	third	step	of	coenzyme	A	biosynthesis	[Source:SGD;Acc:S000005580]
#INFO:	BIOGRID	NEIGHBOUR:	HMS2	Protein	with	similarity	to	heat	shock	transcription	factors;	overexpression	suppresses	the	pseudohyphal	filamentation	defect	of	a	diploid	mep1	mep2	homozygous	null	mutant	[Source:SGD;Acc:S000003908]
#INFO:	BIOGRID	NEIGHBOUR:	TDH1	Glyceraldehyde-3-phosphate	dehydrogenase,	isozyme	1,	involved	in	glycolysis	and	gluconeogenesis;	tetramer	that	catalyzes	the	reaction	of	glyceraldehyde-3-phosphate	to	1,3	bis-phosphoglycerate;	detected	in	the	cytoplasm	and	cell	wall	[Source:SGD;Acc:S000003588]
#INFO:	BIOGRID	NEIGHBOUR:	PHB1	Subunit	of	the	prohibitin	complex	(Phb1p-Phb2p),	a	1.2	MDa	ring-shaped	inner	mitochondrial	membrane	chaperone	that	stabilizes	newly	synthesized	proteins;	determinant	of	replicative	life	span;	involved	in	mitochondrial	segregation	[Source:SGD;Acc:S000003364]
#INFO:	BIOGRID	NEIGHBOUR:	DED1	ATP-dependent	DEAD	(Asp-Glu-Ala-Asp)-box	RNA	helicase,	required	for	translation	initiation	of	all	yeast	mRNAs;	mutations	in	human	DEAD-box	DBY	are	a	frequent	cause	of	male	infertility	[Source:SGD;Acc:S000005730]
#INFO:	BIOGRID	NEIGHBOUR:	ERG1	Squalene	epoxidase,	catalyzes	the	epoxidation	of	squalene	to	2,3-oxidosqualene;	plays	an	essential	role	in	the	ergosterol-biosynthesis	pathway	and	is	the	specific	target	of	the	antifungal	drug	terbinafine	[Source:SGD;Acc:S000003407]
#INFO:	BIOGRID	NEIGHBOUR:	TYE7	Serine-rich	protein	that	contains	a	basic-helix-loop-helix	(bHLH)	DNA	binding	motif;	binds	E-boxes	of	glycolytic	genes	and	contributes	to	their	activation;	may	function	as	a	transcriptional	activator	in	Ty1-mediated	gene	expression	[Source:SGD;Acc:S000005871]
#INFO:	BIOGRID	NEIGHBOUR:	STE24	Highly	conserved	zinc	metalloprotease	that	functions	in	two	steps	of	a-factor	maturation,	C-terminal	CAAX	proteolysis	and	the	first	step	of	N-terminal	proteolytic	processing;	contains	multiple	transmembrane	spans	[Source:SGD;Acc:S000003878]
#INFO:	BIOGRID	NEIGHBOUR:	YJR039W	Putative	protein	of	unknown	function;	the	authentic,	non-tagged	protein	is	detected	in	highly	purified	mitochondria	in	high-throughput	studies	[Source:SGD;Acc:S000003800]
#INFO:	BIOGRID	NEIGHBOUR:	PAM17	Constituent	of	the	Translocase	of	the	Inner	Mitochondrial	membrane	(TIM23	complex);	proposed	alternatively	to	be	a	component	of	the	import	motor	(PAM	complex)	or	to	interact	with	and	modulate	the	core	TIM23	complex	[Source:SGD;Acc:S000001773]
#INFO:	BIOGRID	NEIGHBOUR:	RSM25	Mitochondrial	ribosomal	protein	of	the	small	subunit	[Source:SGD;Acc:S000001355]
#INFO:	BIOGRID	NEIGHBOUR:	COX13	Subunit	VIa	of	cytochrome	c	oxidase,	which	is	the	terminal	member	of	the	mitochondrial	inner	membrane	electron	transport	chain;	not	essential	for	cytochrome	c	oxidase	activity	but	may	modulate	activity	in	response	to	ATP	[Source:SGD;Acc:S000003159]
#INFO:	BIOGRID	NEIGHBOUR:	SPB1	AdoMet-dependent	methyltransferase	involved	in	rRNA	processing	and	60S	ribosomal	subunit	maturation;	methylates	G2922	in	the	tRNA	docking	site	of	the	large	subunit	rRNA	and	in	the	absence	of	snR52,	U2921;	suppressor	of	PAB1	mutants	[Source:SGD;Acc:S000000559]
#INFO:	BIOGRID	NEIGHBOUR:	UTP22	Possible	U3	snoRNP	protein	involved	in	maturation	of	pre-18S	rRNA,	based	on	computational	analysis	of	large-scale	protein-protein	interaction	data	[Source:SGD;Acc:S000003322]
#INFO:	BIOGRID	NEIGHBOUR:	SAM3	High-affinity	S-adenosylmethionine	permease,	required	for	utilization	of	S-adenosylmethionine	as	a	sulfur	source;	has	similarity	to	S-methylmethionine	permease	Mmp1p	[Source:SGD;Acc:S000006195]
#INFO:	BIOGRID	NEIGHBOUR:	LPD1	Dihydrolipoamide	dehydrogenase,	the	lipoamide	dehydrogenase	component	(E3)	of	the	pyruvate	dehydrogenase	and	2-oxoglutarate	dehydrogenase	multi-enzyme	complexes	[Source:SGD;Acc:S000001876]
#INFO:	BIOGRID	NEIGHBOUR:	RPS17B	Ribosomal	protein	51	(rp51)	of	the	small	(40s)	subunit;	nearly	identical	to	Rps17Ap	and	has	similarity	to	rat	S17	ribosomal	protein	[Source:SGD;Acc:S000002855]
#INFO:	BIOGRID	NEIGHBOUR:	RPC19	RNA	polymerase	subunit	AC19,	common	to	RNA	polymerases	I	and	III	[Source:SGD;Acc:S000005057]
#INFO:	BIOGRID	NEIGHBOUR:	TOM70	Component	of	the	TOM	(translocase	of	outer	membrane)	complex	responsible	for	recognition	and	initial	import	steps	for	all	mitochondrially	directed	proteins;	acts	as	a	receptor	for	incoming	precursor	proteins	[Source:SGD;Acc:S000005065]
#INFO:	BIOGRID	NEIGHBOUR:	COS6	Protein	of	unknown	function,	member	of	the	DUP380	subfamily	of	conserved,	often	subtelomerically-encoded	proteins	[Source:SGD;Acc:S000003527]
#INFO:	BIOGRID	NEIGHBOUR:	TOP1	Topoisomerase	I,	nuclear	enzyme	that	relieves	torsional	strain	in	DNA	by	cleaving	and	re-sealing	the	phosphodiester	backbone;	relaxes	both	positively	and	negatively	supercoiled	DNA;	functions	in	replication,	transcription,	and	recombination	[Source:SGD;Acc:S000005366]
#INFO:	BIOGRID	NEIGHBOUR:	RPS11B	Protein	component	of	the	small	(40S)	ribosomal	subunit;	identical	to	Rps11Bp	and	has	similarity	to	E.	coli	S17	and	rat	S11	ribosomal	proteins	[Source:SGD;Acc:S000002432]
#INFO:	BIOGRID	NEIGHBOUR:	PAC10	Part	of	the	heteromeric	co-chaperone	GimC/prefoldin	complex,	which	promotes	efficient	protein	folding	[Source:SGD;Acc:S000003310]
#INFO:	BIOGRID	NEIGHBOUR:	QCR7	Subunit	7	of	the	ubiquinol	cytochrome-c	reductase	complex,	which	is	a	component	of	the	mitochondrial	inner	membrane	electron	transport	chain;	oriented	facing	the	mitochondrial	matrix;	N-terminus	appears	to	play	a	role	in	complex	assembly	[Source:SGD;Acc:S000002937]
#INFO:	BIOGRID	NEIGHBOUR:	RPS22A	Protein	component	of	the	small	(40S)	ribosomal	subunit;	nearly	identical	to	Rps22Bp	and	has	similarity	to	E.	coli	S8	and	rat	S15a	ribosomal	proteins	[Source:SGD;Acc:S000003726]
#INFO:	BIOGRID	NEIGHBOUR:	SDH4	Membrane	anchor	subunit	of	succinate	dehydrogenase	(Sdh1p,	Sdh2p,	Sdh3p,	Sdh4p),	which	couples	the	oxidation	of	succinate	to	the	transfer	of	electrons	to	ubiquinone	as	part	of	the	TCA	cycle	and	the	mitochondrial	respiratory	chain	[Source:SGD;Acc:S000002585]
#INFO:	BIOGRID	NEIGHBOUR:	CLC1	Clathrin	light	chain,	subunit	of	the	major	coat	protein	involved	in	intracellular	protein	transport	and	endocytosis;	thought	to	regulate	clathrin	function;	two	Clathrin	heavy	chains	(CHC1)	form	the	clathrin	triskelion	structural	component	[Source:SGD;Acc:S000003399]
#INFO:	BIOGRID	NEIGHBOUR:	RPS15	Protein	component	of	the	small	(40S)	ribosomal	subunit;	has	similarity	to	E.	coli	S19	and	rat	S15	ribosomal	proteins	[Source:SGD;Acc:S000005400]
#INFO:	BIOGRID	NEIGHBOUR:	DPH1	Protein	required,	along	with	Dph2p,	Kti11p,	Jjj3p,	and	Dph5p,	for	synthesis	of	diphthamide,	which	is	a	modified	histidine	residue	of	translation	elongation	factor	2	(Eft1p	or	Eft2p);	may	act	in	a	complex	with	Dph2p	and	Kti11p	[Source:SGD;Acc:S000001365]
#INFO:	BIOGRID	NEIGHBOUR:	RIO2	Essential	serine	kinase	involved	in	the	processing	of	the	20S	pre-rRNA	into	mature	18S	rRNA;	has	similarity	to	Rio1p	[Source:SGD;Acc:S000005151]
#INFO:	BIOGRID	NEIGHBOUR:	NDE1	Mitochondrial	external	NADH	dehydrogenase,	a	type	II	NAD(P)H:quinone	oxidoreductase	that	catalyzes	the	oxidation	of	cytosolic	NADH;	Nde1p	and	Nde2p	provide	cytosolic	NADH	to	the	mitochondrial	respiratory	chain	[Source:SGD;Acc:S000004753]
#INFO:
#INFO:	---	BIOGRID	graph	structure
#INFO:
#INFO:	BIOGRID	INTERACTION:	TOM7*	MMM1
#INFO:	BIOGRID	INTERACTION:	TOM7*	TOM22
#INFO:	BIOGRID	INTERACTION:	TOM7*	NAB2
#INFO:	BIOGRID	INTERACTION:	TOM7*	FCJ1*
#INFO:	BIOGRID	INTERACTION:	TOM7*	ERG11*
#INFO:	BIOGRID	INTERACTION:	TOM7*	TOM20
#INFO:	BIOGRID	INTERACTION:	TOM7*	LSM1
#INFO:	BIOGRID	INTERACTION:	TOM7*	UBI4
#INFO:	BIOGRID	INTERACTION:	TOM7*	SBP1
#INFO:	BIOGRID	INTERACTION:	TOM7*	PUF3
#INFO:	BIOGRID	INTERACTION:	TOM7*	MDM12
#INFO:	BIOGRID	INTERACTION:	TOM7*	SAM35
#INFO:	BIOGRID	INTERACTION:	TOM7*	MDM10
#INFO:	BIOGRID	INTERACTION:	TOM7*	TOM40
#INFO:	BIOGRID	INTERACTION:	APS1*	APM2
#INFO:	BIOGRID	INTERACTION:	APS1*	APL2
#INFO:	BIOGRID	INTERACTION:	APS1*	IRC6
#INFO:	BIOGRID	INTERACTION:	APS1*	YRA1
#INFO:	BIOGRID	INTERACTION:	APS1*	GAL10
#INFO:	BIOGRID	INTERACTION:	APS1*	APM1
#INFO:	BIOGRID	INTERACTION:	APS1*	YFL034W
#INFO:	BIOGRID	INTERACTION:	APS1*	GGA2
#INFO:	BIOGRID	INTERACTION:	APS1*	CHC1
#INFO:	BIOGRID	INTERACTION:	APS1*	APL4
#INFO:	BIOGRID	INTERACTION:	APS1*	RVB2
#INFO:	BIOGRID	INTERACTION:	APS1*	CST26
#INFO:	BIOGRID	INTERACTION:	APS1*	APS1*
#INFO:	BIOGRID	INTERACTION:	APS1*	CLC1
#INFO:	BIOGRID	INTERACTION:	APS1*	GIS2
#INFO:	BIOGRID	INTERACTION:	APS1*	CHS3
#INFO:	BIOGRID	INTERACTION:	ATP20*	SHE2
#INFO:	BIOGRID	INTERACTION:	ATP20*	NAB2
#INFO:	BIOGRID	INTERACTION:	ATP20*	SRO9
#INFO:	BIOGRID	INTERACTION:	ATP20*	ATP18
#INFO:	BIOGRID	INTERACTION:	ATP20*	ATP4
#INFO:	BIOGRID	INTERACTION:	ATP20*	OPT2
#INFO:	BIOGRID	INTERACTION:	ATP20*	SLF1
#INFO:	BIOGRID	INTERACTION:	ATP20*	AGP1
#INFO:	BIOGRID	INTERACTION:	ATP20*	TIM11
#INFO:	BIOGRID	INTERACTION:	ATP20*	ATP20*
#INFO:	BIOGRID	INTERACTION:	ZEO1*	NAB2
#INFO:	BIOGRID	INTERACTION:	ZEO1*	RPN11
#INFO:	BIOGRID	INTERACTION:	ZEO1*	CMD1
#INFO:	BIOGRID	INTERACTION:	ZEO1*	UBI4
#INFO:	BIOGRID	INTERACTION:	ZEO1*	MOT3
#INFO:	BIOGRID	INTERACTION:	ZEO1*	MID2
#INFO:	BIOGRID	INTERACTION:	ZEO1*	DHH1
#INFO:	BIOGRID	INTERACTION:	ZEO1*	PET10
#INFO:	BIOGRID	INTERACTION:	ZEO1*	FCJ1*
#INFO:	BIOGRID	INTERACTION:	ZEO1*	UBP3
#INFO:	BIOGRID	INTERACTION:	ZEO1*	MEP2
#INFO:	BIOGRID	INTERACTION:	ZEO1*	SMT3
#INFO:	BIOGRID	INTERACTION:	ZEO1*	DDR48
#INFO:	BIOGRID	INTERACTION:	ZEO1*	SSA1
#INFO:	BIOGRID	INTERACTION:	ZEO1*	PUF3
#INFO:	BIOGRID	INTERACTION:	ZEO1*	MTC1
#INFO:	BIOGRID	INTERACTION:	ZEO1*	DPH1
#INFO:	BIOGRID	INTERACTION:	HMG1*	SPO75
#INFO:	BIOGRID	INTERACTION:	HMG1*	SUR4
#INFO:	BIOGRID	INTERACTION:	HMG1*	IRE1
#INFO:	BIOGRID	INTERACTION:	HMG1*	YPL264C
#INFO:	BIOGRID	INTERACTION:	HMG1*	TNA1
#INFO:	BIOGRID	INTERACTION:	HMG1*	SLA1
#INFO:	BIOGRID	INTERACTION:	HMG1*	HEK2
#INFO:	BIOGRID	INTERACTION:	HMG1*	WBP1
#INFO:	BIOGRID	INTERACTION:	HMG1*	ALG7
#INFO:	BIOGRID	INTERACTION:	HMG1*	HRD3
#INFO:	BIOGRID	INTERACTION:	HMG1*	HMG2
#INFO:	BIOGRID	INTERACTION:	HMG1*	RPL27A
#INFO:	BIOGRID	INTERACTION:	HMG1*	SRP102
#INFO:	BIOGRID	INTERACTION:	HMG1*	CSE4
#INFO:	BIOGRID	INTERACTION:	HMG1*	SNL1
#INFO:	BIOGRID	INTERACTION:	HMG1*	PHO88
#INFO:	BIOGRID	INTERACTION:	HMG1*	HMG1*
#INFO:	BIOGRID	INTERACTION:	HMG1*	ERG25
#INFO:	BIOGRID	INTERACTION:	HMG1*	RAD51
#INFO:	BIOGRID	INTERACTION:	HMG1*	HRD1
#INFO:	BIOGRID	INTERACTION:	HMG1*	VPS73
#INFO:	BIOGRID	INTERACTION:	HMG1*	NSG1
#INFO:	BIOGRID	INTERACTION:	HMG1*	IFA38
#INFO:	BIOGRID	INTERACTION:	ATP19*	NAB2
#INFO:	BIOGRID	INTERACTION:	ATP19*	FCJ1*
#INFO:	BIOGRID	INTERACTION:	ATP19*	PUF3
#INFO:	BIOGRID	INTERACTION:	LOC1*	NAB2
#INFO:	BIOGRID	INTERACTION:	LOC1*	DRS1
#INFO:	BIOGRID	INTERACTION:	LOC1*	SGV1
#INFO:	BIOGRID	INTERACTION:	LOC1*	RPL9A
#INFO:	BIOGRID	INTERACTION:	LOC1*	RPL20B
#INFO:	BIOGRID	INTERACTION:	LOC1*	RPL4B
#INFO:	BIOGRID	INTERACTION:	LOC1*	BRX1
#INFO:	BIOGRID	INTERACTION:	LOC1*	NOP15
#INFO:	BIOGRID	INTERACTION:	LOC1*	RPL31A
#INFO:	BIOGRID	INTERACTION:	LOC1*	HRK1
#INFO:	BIOGRID	INTERACTION:	LOC1*	RLP24
#INFO:	BIOGRID	INTERACTION:	LOC1*	RPL7B
#INFO:	BIOGRID	INTERACTION:	LOC1*	YTM1
#INFO:	BIOGRID	INTERACTION:	LOC1*	RPL16A
#INFO:	BIOGRID	INTERACTION:	LOC1*	GIS2
#INFO:	BIOGRID	INTERACTION:	LOC1*	EBP2
#INFO:	BIOGRID	INTERACTION:	LOC1*	TIF6
#INFO:	BIOGRID	INTERACTION:	LOC1*	RPF1
#INFO:	BIOGRID	INTERACTION:	LOC1*	THP3
#INFO:	BIOGRID	INTERACTION:	LOC1*	NOC3
#INFO:	BIOGRID	INTERACTION:	LOC1*	ORC1
#INFO:	BIOGRID	INTERACTION:	LOC1*	MRT4
#INFO:	BIOGRID	INTERACTION:	LOC1*	NOG1
#INFO:	BIOGRID	INTERACTION:	LOC1*	NOC2
#INFO:	BIOGRID	INTERACTION:	LOC1*	IPI3
#INFO:	BIOGRID	INTERACTION:	LOC1*	ULP2
#INFO:	BIOGRID	INTERACTION:	LOC1*	FPR4
#INFO:	BIOGRID	INTERACTION:	LOC1*	RLP7
#INFO:	BIOGRID	INTERACTION:	LOC1*	ELA1
#INFO:	BIOGRID	INTERACTION:	LOC1*	ERB1
#INFO:	BIOGRID	INTERACTION:	LOC1*	NOP58
#INFO:	BIOGRID	INTERACTION:	LOC1*	NUG1
#INFO:	BIOGRID	INTERACTION:	LOC1*	RRP15
#INFO:	BIOGRID	INTERACTION:	LOC1*	ASH1
#INFO:	BIOGRID	INTERACTION:	LOC1*	NIP7
#INFO:	BIOGRID	INTERACTION:	LOC1*	RPL23B
#INFO:	BIOGRID	INTERACTION:	LOC1*	PWP1
#INFO:	BIOGRID	INTERACTION:	LOC1*	NOP2
#INFO:	BIOGRID	INTERACTION:	LOC1*	RPL13B
#INFO:	BIOGRID	INTERACTION:	LOC1*	HRR25
#INFO:	BIOGRID	INTERACTION:	LOC1*	DBP7
#INFO:	BIOGRID	INTERACTION:	LOC1*	HAS1
#INFO:	BIOGRID	INTERACTION:	LOC1*	RPL1B
#INFO:	BIOGRID	INTERACTION:	LOC1*	UBP10
#INFO:	BIOGRID	INTERACTION:	LOC1*	GAR1
#INFO:	BIOGRID	INTERACTION:	LOC1*	RPF2
#INFO:	BIOGRID	INTERACTION:	LOC1*	RPL5
#INFO:	BIOGRID	INTERACTION:	LOC1*	GLC7
#INFO:	BIOGRID	INTERACTION:	LOC1*	RPL3
#INFO:	BIOGRID	INTERACTION:	LOC1*	NSA1
#INFO:	BIOGRID	INTERACTION:	LOC1*	RRP1
#INFO:	BIOGRID	INTERACTION:	LOC1*	SHE2
#INFO:	BIOGRID	INTERACTION:	LOC1*	RPL23A
#INFO:	BIOGRID	INTERACTION:	LOC1*	RRP17
#INFO:	BIOGRID	INTERACTION:	LOC1*	MUS81
#INFO:	BIOGRID	INTERACTION:	LOC1*	RPL1A
#INFO:	BIOGRID	INTERACTION:	LOC1*	MAK11
#INFO:	BIOGRID	INTERACTION:	LOC1*	RPL20A
#INFO:	BIOGRID	INTERACTION:	LOC1*	SPB4
#INFO:	BIOGRID	INTERACTION:	LOC1*	SPB1
#INFO:	BIOGRID	INTERACTION:	LOC1*	RPL30
#INFO:	BIOGRID	INTERACTION:	LOC1*	RPL8B
#INFO:	BIOGRID	INTERACTION:	LOC1*	DBP10
#INFO:	BIOGRID	INTERACTION:	LOC1*	HAP2
#INFO:	BIOGRID	INTERACTION:	LOC1*	RPL7A
#INFO:	BIOGRID	INTERACTION:	LOC1*	SPT5
#INFO:	BIOGRID	INTERACTION:	LOC1*	SRO9
#INFO:	BIOGRID	INTERACTION:	LOC1*	RPL25
#INFO:	BIOGRID	INTERACTION:	LOC1*	DSN1
#INFO:	BIOGRID	INTERACTION:	LOC1*	RRP14
#INFO:	BIOGRID	INTERACTION:	LOC1*	SMT3
#INFO:	BIOGRID	INTERACTION:	LOC1*	RRP5
#INFO:	BIOGRID	INTERACTION:	LOC1*	NOP7
#INFO:	BIOGRID	INTERACTION:	MSC7*	GOT1
#INFO:	BIOGRID	INTERACTION:	MSC7*	DIG2
#INFO:	BIOGRID	INTERACTION:	MSC7*	SSA2
#INFO:	BIOGRID	INTERACTION:	MSC7*	RPN11
#INFO:	BIOGRID	INTERACTION:	MSC7*	YRA1
#INFO:	BIOGRID	INTERACTION:	MSC7*	LSM12
#INFO:	BIOGRID	INTERACTION:	MSC7*	UBI4
#INFO:	BIOGRID	INTERACTION:	MSC7*	WBP1
#INFO:	BIOGRID	INTERACTION:	MSC7*	PIS1
#INFO:	BIOGRID	INTERACTION:	MSC7*	STM1
#INFO:	BIOGRID	INTERACTION:	MSC7*	PMA1
#INFO:	BIOGRID	INTERACTION:	MSC7*	HMO1
#INFO:	BIOGRID	INTERACTION:	MSC7*	SWP1
#INFO:	BIOGRID	INTERACTION:	MSC7*	ERV25
#INFO:	BIOGRID	INTERACTION:	MSC7*	MSC7*
#INFO:	BIOGRID	INTERACTION:	MSC7*	BRE5
#INFO:	BIOGRID	INTERACTION:	MSC7*	SAC1
#INFO:	BIOGRID	INTERACTION:	MSC7*	ERV29
#INFO:	BIOGRID	INTERACTION:	MSC7*	SCS7
#INFO:	BIOGRID	INTERACTION:	MSC7*	VHS3
#INFO:	BIOGRID	INTERACTION:	MSC7*	GUP1
#INFO:	BIOGRID	INTERACTION:	MSC7*	RAD4
#INFO:	BIOGRID	INTERACTION:	MSC7*	SSA1
#INFO:	BIOGRID	INTERACTION:	MSC7*	ERP1
#INFO:	BIOGRID	INTERACTION:	MSC7*	NOP1
#INFO:	BIOGRID	INTERACTION:	AIM13*	AIM5
#INFO:	BIOGRID	INTERACTION:	AIM13*	MOS1
#INFO:	BIOGRID	INTERACTION:	AIM13*	FCJ1*
#INFO:	BIOGRID	INTERACTION:	AIM13*	RPC19
#INFO:	BIOGRID	INTERACTION:	AIM13*	SAM50
#INFO:	BIOGRID	INTERACTION:	AIM13*	TOP1
#INFO:	BIOGRID	INTERACTION:	AIM13*	MOS2
#INFO:	BIOGRID	INTERACTION:	AIM13*	GIS2
#INFO:	BIOGRID	INTERACTION:	AIM13*	AIM37
#INFO:	BIOGRID	INTERACTION:	PUN1*	WHI3
#INFO:	BIOGRID	INTERACTION:	PUN1*	SLF1
#INFO:	BIOGRID	INTERACTION:	PUN1*	HEK2
#INFO:	BIOGRID	INTERACTION:	PUN1*	PUN1*
#INFO:	BIOGRID	INTERACTION:	PUN1*	UBI4
#INFO:	BIOGRID	INTERACTION:	PUN1*	NAB2
#INFO:	BIOGRID	INTERACTION:	PUN1*	SRO9
#INFO:	BIOGRID	INTERACTION:	CIC1*	RPL10
#INFO:	BIOGRID	INTERACTION:	CIC1*	NUP116
#INFO:	BIOGRID	INTERACTION:	CIC1*	DRS1
#INFO:	BIOGRID	INTERACTION:	CIC1*	SCL1
#INFO:	BIOGRID	INTERACTION:	CIC1*	RPL20B
#INFO:	BIOGRID	INTERACTION:	CIC1*	BRX1
#INFO:	BIOGRID	INTERACTION:	CIC1*	NOP15
#INFO:	BIOGRID	INTERACTION:	CIC1*	CKA2
#INFO:	BIOGRID	INTERACTION:	CIC1*	RPL31A
#INFO:	BIOGRID	INTERACTION:	CIC1*	HRK1
#INFO:	BIOGRID	INTERACTION:	CIC1*	NOP4
#INFO:	BIOGRID	INTERACTION:	CIC1*	CKA1
#INFO:	BIOGRID	INTERACTION:	CIC1*	RLP24
#INFO:	BIOGRID	INTERACTION:	CIC1*	YVH1
#INFO:	BIOGRID	INTERACTION:	CIC1*	FUN12
#INFO:	BIOGRID	INTERACTION:	CIC1*	RPL39
#INFO:	BIOGRID	INTERACTION:	CIC1*	YTM1
#INFO:	BIOGRID	INTERACTION:	CIC1*	NOP53
#INFO:	BIOGRID	INTERACTION:	CIC1*	TIF6
#INFO:	BIOGRID	INTERACTION:	CIC1*	RPF1
#INFO:	BIOGRID	INTERACTION:	CIC1*	APM1
#INFO:	BIOGRID	INTERACTION:	CIC1*	ORC1
#INFO:	BIOGRID	INTERACTION:	CIC1*	NOG1
#INFO:	BIOGRID	INTERACTION:	CIC1*	NOC2
#INFO:	BIOGRID	INTERACTION:	CIC1*	PRE2
#INFO:	BIOGRID	INTERACTION:	CIC1*	RPT1
#INFO:	BIOGRID	INTERACTION:	CIC1*	NOP6
#INFO:	BIOGRID	INTERACTION:	CIC1*	RPL17A
#INFO:	BIOGRID	INTERACTION:	CIC1*	ELA1
#INFO:	BIOGRID	INTERACTION:	CIC1*	RPL28
#INFO:	BIOGRID	INTERACTION:	CIC1*	RPL35A
#INFO:	BIOGRID	INTERACTION:	CIC1*	PUF3
#INFO:	BIOGRID	INTERACTION:	CIC1*	RPL33A
#INFO:	BIOGRID	INTERACTION:	CIC1*	DIA2
#INFO:	BIOGRID	INTERACTION:	CIC1*	MAK5
#INFO:	BIOGRID	INTERACTION:	CIC1*	NIP7
#INFO:	BIOGRID	INTERACTION:	CIC1*	PRE6
#INFO:	BIOGRID	INTERACTION:	CIC1*	RPL23B
#INFO:	BIOGRID	INTERACTION:	CIC1*	NOP2
#INFO:	BIOGRID	INTERACTION:	CIC1*	RPL14A
#INFO:	BIOGRID	INTERACTION:	CIC1*	SSF1
#INFO:	BIOGRID	INTERACTION:	CIC1*	RPS21A
#INFO:	BIOGRID	INTERACTION:	CIC1*	HAS1
#INFO:	BIOGRID	INTERACTION:	CIC1*	PKH3
#INFO:	BIOGRID	INTERACTION:	CIC1*	MDN1
#INFO:	BIOGRID	INTERACTION:	CIC1*	UBP10
#INFO:	BIOGRID	INTERACTION:	CIC1*	PRE4
#INFO:	BIOGRID	INTERACTION:	CIC1*	RPL13A
#INFO:	BIOGRID	INTERACTION:	CIC1*	RPL3
#INFO:	BIOGRID	INTERACTION:	CIC1*	NSA1
#INFO:	BIOGRID	INTERACTION:	CIC1*	REG1
#INFO:	BIOGRID	INTERACTION:	CIC1*	JJJ1
#INFO:	BIOGRID	INTERACTION:	CIC1*	RRP17
#INFO:	BIOGRID	INTERACTION:	CIC1*	RPL1A
#INFO:	BIOGRID	INTERACTION:	CIC1*	IPI1
#INFO:	BIOGRID	INTERACTION:	CIC1*	PAT1
#INFO:	BIOGRID	INTERACTION:	CIC1*	SPB4
#INFO:	BIOGRID	INTERACTION:	CIC1*	DBP2
#INFO:	BIOGRID	INTERACTION:	CIC1*	PRP43
#INFO:	BIOGRID	INTERACTION:	CIC1*	RPL30
#INFO:	BIOGRID	INTERACTION:	CIC1*	RPL7A
#INFO:	BIOGRID	INTERACTION:	CIC1*	RPL25
#INFO:	BIOGRID	INTERACTION:	CIC1*	SMT3
#INFO:	BIOGRID	INTERACTION:	CIC1*	HTZ1
#INFO:	BIOGRID	INTERACTION:	CIC1*	RRP5
#INFO:	BIOGRID	INTERACTION:	CIC1*	RPL12B
#INFO:	BIOGRID	INTERACTION:	CIC1*	NOP7
#INFO:	BIOGRID	INTERACTION:	CIC1*	ARX1
#INFO:	BIOGRID	INTERACTION:	CIC1*	DNL4
#INFO:	BIOGRID	INTERACTION:	CIC1*	SDA1
#INFO:	BIOGRID	INTERACTION:	CIC1*	RPL38
#INFO:	BIOGRID	INTERACTION:	CIC1*	UTP10
#INFO:	BIOGRID	INTERACTION:	CIC1*	HTA2
#INFO:	BIOGRID	INTERACTION:	CIC1*	URB1
#INFO:	BIOGRID	INTERACTION:	CIC1*	LSM1
#INFO:	BIOGRID	INTERACTION:	CIC1*	RPL4B
#INFO:	BIOGRID	INTERACTION:	CIC1*	RPL32
#INFO:	BIOGRID	INTERACTION:	CIC1*	PUF6
#INFO:	BIOGRID	INTERACTION:	CIC1*	NOP14
#INFO:	BIOGRID	INTERACTION:	CIC1*	LOC1*
#INFO:	BIOGRID	INTERACTION:	CIC1*	RIX7
#INFO:	BIOGRID	INTERACTION:	CIC1*	BCK1
#INFO:	BIOGRID	INTERACTION:	CIC1*	RPL16A
#INFO:	BIOGRID	INTERACTION:	CIC1*	BUD20
#INFO:	BIOGRID	INTERACTION:	CIC1*	NOP12
#INFO:	BIOGRID	INTERACTION:	CIC1*	NOP56
#INFO:	BIOGRID	INTERACTION:	CIC1*	EBP2
#INFO:	BIOGRID	INTERACTION:	CIC1*	MAK21
#INFO:	BIOGRID	INTERACTION:	CIC1*	UTP15
#INFO:	BIOGRID	INTERACTION:	CIC1*	YRA1
#INFO:	BIOGRID	INTERACTION:	CIC1*	NOC3
#INFO:	BIOGRID	INTERACTION:	CIC1*	FRK1
#INFO:	BIOGRID	INTERACTION:	CIC1*	CBF5
#INFO:	BIOGRID	INTERACTION:	CIC1*	MRT4
#INFO:	BIOGRID	INTERACTION:	CIC1*	RPL27A
#INFO:	BIOGRID	INTERACTION:	CIC1*	ZUO1
#INFO:	BIOGRID	INTERACTION:	CIC1*	IPI3
#INFO:	BIOGRID	INTERACTION:	CIC1*	RPL35B
#INFO:	BIOGRID	INTERACTION:	CIC1*	NOP16
#INFO:	BIOGRID	INTERACTION:	CIC1*	UBP3
#INFO:	BIOGRID	INTERACTION:	CIC1*	FPR4
#INFO:	BIOGRID	INTERACTION:	CIC1*	ULP2
#INFO:	BIOGRID	INTERACTION:	CIC1*	NOG2
#INFO:	BIOGRID	INTERACTION:	CIC1*	RLP7
#INFO:	BIOGRID	INTERACTION:	CIC1*	ERB1
#INFO:	BIOGRID	INTERACTION:	CIC1*	SBP1
#INFO:	BIOGRID	INTERACTION:	CIC1*	RIX1
#INFO:	BIOGRID	INTERACTION:	CIC1*	DBP9
#INFO:	BIOGRID	INTERACTION:	CIC1*	ALB1
#INFO:	BIOGRID	INTERACTION:	CIC1*	NOP58
#INFO:	BIOGRID	INTERACTION:	CIC1*	NUG1
#INFO:	BIOGRID	INTERACTION:	CIC1*	SSF2
#INFO:	BIOGRID	INTERACTION:	CIC1*	PWP1
#INFO:	BIOGRID	INTERACTION:	CIC1*	RPL12A
#INFO:	BIOGRID	INTERACTION:	CIC1*	KRE33
#INFO:	BIOGRID	INTERACTION:	CIC1*	CIC1*
#INFO:	BIOGRID	INTERACTION:	CIC1*	RPL1B
#INFO:	BIOGRID	INTERACTION:	CIC1*	RPF2
#INFO:	BIOGRID	INTERACTION:	CIC1*	RPL5
#INFO:	BIOGRID	INTERACTION:	CIC1*	XRN1
#INFO:	BIOGRID	INTERACTION:	CIC1*	GLC7
#INFO:	BIOGRID	INTERACTION:	CIC1*	NOP1
#INFO:	BIOGRID	INTERACTION:	CIC1*	NOP13
#INFO:	BIOGRID	INTERACTION:	CIC1*	RRP1
#INFO:	BIOGRID	INTERACTION:	CIC1*	NSA2
#INFO:	BIOGRID	INTERACTION:	CIC1*	RPL23A
#INFO:	BIOGRID	INTERACTION:	CIC1*	RRS1
#INFO:	BIOGRID	INTERACTION:	CIC1*	MAK11
#INFO:	BIOGRID	INTERACTION:	CIC1*	RPL36B
#INFO:	BIOGRID	INTERACTION:	CIC1*	RPL20A
#INFO:	BIOGRID	INTERACTION:	CIC1*	SPB1
#INFO:	BIOGRID	INTERACTION:	CIC1*	RRP12
#INFO:	BIOGRID	INTERACTION:	CIC1*	RSA4
#INFO:	BIOGRID	INTERACTION:	CIC1*	RPL8B
#INFO:	BIOGRID	INTERACTION:	CIC1*	DBP10
#INFO:	BIOGRID	INTERACTION:	CIC1*	HAP2
#INFO:	BIOGRID	INTERACTION:	CIC1*	MSS116
#INFO:	BIOGRID	INTERACTION:	CIC1*	DSN1
#INFO:	BIOGRID	INTERACTION:	CIC1*	RPS22A
#INFO:	BIOGRID	INTERACTION:	CIC1*	RPS15
#INFO:	BIOGRID	INTERACTION:	CIC1*	RPS26A
#INFO:	BIOGRID	INTERACTION:	ERG11*	ERG3
#INFO:	BIOGRID	INTERACTION:	ERG11*	OLE1
#INFO:	BIOGRID	INTERACTION:	ERG11*	ACF2
#INFO:	BIOGRID	INTERACTION:	ERG11*	DAP1
#INFO:	BIOGRID	INTERACTION:	ERG11*	ERG24
#INFO:	BIOGRID	INTERACTION:	ERG11*	SEC62
#INFO:	BIOGRID	INTERACTION:	ERG11*	LSM1
#INFO:	BIOGRID	INTERACTION:	ERG11*	PHO86
#INFO:	BIOGRID	INTERACTION:	ERG11*	MID2
#INFO:	BIOGRID	INTERACTION:	ERG11*	GPI2
#INFO:	BIOGRID	INTERACTION:	ERG11*	ERG7
#INFO:	BIOGRID	INTERACTION:	ERG11*	SCS7
#INFO:	BIOGRID	INTERACTION:	ERG11*	ERG25
#INFO:	BIOGRID	INTERACTION:	ERG11*	PPZ1
#INFO:	BIOGRID	INTERACTION:	ERG11*	RTN2
#INFO:	BIOGRID	INTERACTION:	ERG11*	ARV1
#INFO:	BIOGRID	INTERACTION:	ERG11*	SSH1
#INFO:	BIOGRID	INTERACTION:	ERG11*	KES1
#INFO:	BIOGRID	INTERACTION:	ERG11*	SHU1
#INFO:	BIOGRID	INTERACTION:	ERG11*	TRK2
#INFO:	BIOGRID	INTERACTION:	ERG11*	KRE27
#INFO:	BIOGRID	INTERACTION:	ERG11*	SHR3
#INFO:	BIOGRID	INTERACTION:	ERG11*	NDI1
#INFO:	BIOGRID	INTERACTION:	ERG11*	GPI17
#INFO:	BIOGRID	INTERACTION:	ERG11*	ERG5*
#INFO:	BIOGRID	INTERACTION:	ERG11*	LAC1
#INFO:	BIOGRID	INTERACTION:	ERG11*	ERG4
#INFO:	BIOGRID	INTERACTION:	ERG11*	CYS4
#INFO:	BIOGRID	INTERACTION:	ERG11*	CHO2
#INFO:	BIOGRID	INTERACTION:	ERG11*	ERG28
#INFO:	BIOGRID	INTERACTION:	ERG11*	ERV29
#INFO:	BIOGRID	INTERACTION:	ERG11*	ERG27
#INFO:	BIOGRID	INTERACTION:	ERG11*	HYR1
#INFO:	BIOGRID	INTERACTION:	ERG11*	ORM2
#INFO:	BIOGRID	INTERACTION:	ERG11*	PKR1
#INFO:	BIOGRID	INTERACTION:	ERG11*	SUR2
#INFO:	BIOGRID	INTERACTION:	ERG11*	OSH6
#INFO:	BIOGRID	INTERACTION:	ERG11*	SBP1
#INFO:	BIOGRID	INTERACTION:	ERG11*	PUF3
#INFO:	BIOGRID	INTERACTION:	ERG11*	GPI8
#INFO:	BIOGRID	INTERACTION:	ERG11*	MMM1
#INFO:	BIOGRID	INTERACTION:	ERG11*	SCS2
#INFO:	BIOGRID	INTERACTION:	ERG11*	SPC2
#INFO:	BIOGRID	INTERACTION:	ERG11*	UBI4
#INFO:	BIOGRID	INTERACTION:	ERG11*	VMA21
#INFO:	BIOGRID	INTERACTION:	ERG11*	ERG2
#INFO:	BIOGRID	INTERACTION:	ERG11*	HXT1
#INFO:	BIOGRID	INTERACTION:	ERG11*	SEY1
#INFO:	BIOGRID	INTERACTION:	ERG11*	COS4
#INFO:	BIOGRID	INTERACTION:	ERG11*	SWP1
#INFO:	BIOGRID	INTERACTION:	ERG11*	ERV25
#INFO:	BIOGRID	INTERACTION:	ERG11*	COS8
#INFO:	BIOGRID	INTERACTION:	ERG11*	ERG6
#INFO:	BIOGRID	INTERACTION:	ERG11*	FEN1
#INFO:	BIOGRID	INTERACTION:	ERG11*	AVT4
#INFO:	BIOGRID	INTERACTION:	ERG11*	SIS2
#INFO:	BIOGRID	INTERACTION:	ERG11*	ERG11*
#INFO:	BIOGRID	INTERACTION:	ERG11*	VHS3
#INFO:	BIOGRID	INTERACTION:	ERG11*	DAL5
#INFO:	BIOGRID	INTERACTION:	ERG11*	SPC1
#INFO:	BIOGRID	INTERACTION:	ERG11*	ERG9
#INFO:	BIOGRID	INTERACTION:	ERG11*	HNM1
#INFO:	BIOGRID	INTERACTION:	ERG11*	STE24
#INFO:	BIOGRID	INTERACTION:	ERG11*	TPO4
#INFO:	BIOGRID	INTERACTION:	ERG11*	WBP1
#INFO:	BIOGRID	INTERACTION:	ERG11*	PIS1
#INFO:	BIOGRID	INTERACTION:	ERG11*	PAT1
#INFO:	BIOGRID	INTERACTION:	ERG11*	ERG26
#INFO:	BIOGRID	INTERACTION:	ERG11*	SRP14
#INFO:	BIOGRID	INTERACTION:	ERG11*	NCP1
#INFO:	BIOGRID	INTERACTION:	ERG11*	YBT1
#INFO:	BIOGRID	INTERACTION:	ERG11*	SOP4
#INFO:	BIOGRID	INTERACTION:	ERG11*	SAM3
#INFO:	BIOGRID	INTERACTION:	ERG11*	DHH1
#INFO:	BIOGRID	INTERACTION:	ERG11*	YOR1
#INFO:	BIOGRID	INTERACTION:	ERG11*	PHO88
#INFO:	BIOGRID	INTERACTION:	ERG11*	ILM1
#INFO:	BIOGRID	INTERACTION:	ERG11*	GTT1
#INFO:	BIOGRID	INTERACTION:	ERG11*	CPT1
#INFO:	BIOGRID	INTERACTION:	ERG11*	SLC1
#INFO:	BIOGRID	INTERACTION:	ERG11*	COS6
#INFO:	BIOGRID	INTERACTION:	ERG11*	CAB3
#INFO:	BIOGRID	INTERACTION:	ERG11*	ERP1
#INFO:	BIOGRID	INTERACTION:	ERG11*	EPT1
#INFO:	BIOGRID	INTERACTION:	ERG11*	MNN4
#INFO:	BIOGRID	INTERACTION:	RNR2*	NHP6B
#INFO:	BIOGRID	INTERACTION:	RNR2*	NAB2
#INFO:	BIOGRID	INTERACTION:	RNR2*	RNR4
#INFO:	BIOGRID	INTERACTION:	RNR2*	UTP5
#INFO:	BIOGRID	INTERACTION:	RNR2*	UBI4
#INFO:	BIOGRID	INTERACTION:	RNR2*	RPT5
#INFO:	BIOGRID	INTERACTION:	RNR2*	TEM1
#INFO:	BIOGRID	INTERACTION:	RNR2*	SEC27
#INFO:	BIOGRID	INTERACTION:	RNR2*	RAD10
#INFO:	BIOGRID	INTERACTION:	RNR2*	SMC1
#INFO:	BIOGRID	INTERACTION:	RNR2*	UBP10
#INFO:	BIOGRID	INTERACTION:	RNR2*	TIS11
#INFO:	BIOGRID	INTERACTION:	RNR2*	DIF1
#INFO:	BIOGRID	INTERACTION:	RNR2*	WTM2
#INFO:	BIOGRID	INTERACTION:	RNR2*	SMK1
#INFO:	BIOGRID	INTERACTION:	RNR2*	ASF1
#INFO:	BIOGRID	INTERACTION:	RNR2*	RNR1
#INFO:	BIOGRID	INTERACTION:	RNR2*	SEN15
#INFO:	BIOGRID	INTERACTION:	RNR2*	CTH1
#INFO:	BIOGRID	INTERACTION:	RNR2*	RPN11
#INFO:	BIOGRID	INTERACTION:	RNR2*	RPN10
#INFO:	BIOGRID	INTERACTION:	RNR2*	SIT4
#INFO:	BIOGRID	INTERACTION:	RNR2*	KAP122
#INFO:	BIOGRID	INTERACTION:	RNR2*	SIR3
#INFO:	BIOGRID	INTERACTION:	RNR2*	DBP8
#INFO:	BIOGRID	INTERACTION:	RNR2*	RPN1
#INFO:	BIOGRID	INTERACTION:	RNR2*	SWD1
#INFO:	BIOGRID	INTERACTION:	RNR2*	RNR2*
#INFO:	BIOGRID	INTERACTION:	RNR2*	RRP12
#INFO:	BIOGRID	INTERACTION:	RNR2*	WTM1
#INFO:	BIOGRID	INTERACTION:	RNR2*	SMT3
#INFO:	BIOGRID	INTERACTION:	RNR2*	SBP1
#INFO:	BIOGRID	INTERACTION:	RNR2*	PUF3
#INFO:	BIOGRID	INTERACTION:	RNR2*	DPH1
#INFO:	BIOGRID	INTERACTION:	RNR2*	CYR1
#INFO:	BIOGRID	INTERACTION:	MRP21*	RSM23
#INFO:	BIOGRID	INTERACTION:	MRP21*	NAB2
#INFO:	BIOGRID	INTERACTION:	MRP21*	YLH47
#INFO:	BIOGRID	INTERACTION:	MRP21*	MRPS16
#INFO:	BIOGRID	INTERACTION:	MRP21*	RSM22
#INFO:	BIOGRID	INTERACTION:	MRP21*	RSM25
#INFO:	BIOGRID	INTERACTION:	MRP21*	NAM9*
#INFO:	BIOGRID	INTERACTION:	MRP21*	MRPS28
#INFO:	BIOGRID	INTERACTION:	MRP21*	RSM19
#INFO:	BIOGRID	INTERACTION:	MRP21*	RSM26
#INFO:	BIOGRID	INTERACTION:	MRP21*	MRPS5*
#INFO:	BIOGRID	INTERACTION:	MRP21*	MRP51
#INFO:	BIOGRID	INTERACTION:	MRP21*	RSM7
#INFO:	BIOGRID	INTERACTION:	MRP21*	MRPS9
#INFO:	BIOGRID	INTERACTION:	MRP21*	MRPS8
#INFO:	BIOGRID	INTERACTION:	MRP21*	RSM27
#INFO:	BIOGRID	INTERACTION:	MRP21*	EHD3
#INFO:	BIOGRID	INTERACTION:	MRP21*	MRP13
#INFO:	BIOGRID	INTERACTION:	MRP21*	MRPL8
#INFO:	BIOGRID	INTERACTION:	MRP21*	PET123
#INFO:	BIOGRID	INTERACTION:	MRP21*	MRP4
#INFO:	BIOGRID	INTERACTION:	MRP21*	RSM24
#INFO:	BIOGRID	INTERACTION:	MRP21*	MRP1
#INFO:	BIOGRID	INTERACTION:	MRP21*	MRP10
#INFO:	BIOGRID	INTERACTION:	MRP21*	MAM33
#INFO:	BIOGRID	INTERACTION:	MRP21*	MRPS35
#INFO:	BIOGRID	INTERACTION:	MRP21*	GIS2
#INFO:	BIOGRID	INTERACTION:	MRP21*	RSM10
#INFO:	BIOGRID	INTERACTION:	MRP21*	MRPS18
#INFO:	BIOGRID	INTERACTION:	MRPS5*	NAB2
#INFO:	BIOGRID	INTERACTION:	MRPS5*	PRP31
#INFO:	BIOGRID	INTERACTION:	MRPS5*	RSM18
#INFO:	BIOGRID	INTERACTION:	MRPS5*	GEP3
#INFO:	BIOGRID	INTERACTION:	MRPS5*	RSM19
#INFO:	BIOGRID	INTERACTION:	MRPS5*	TIF4631
#INFO:	BIOGRID	INTERACTION:	MRPS5*	UTP20
#INFO:	BIOGRID	INTERACTION:	MRPS5*	RSM27
#INFO:	BIOGRID	INTERACTION:	MRPS5*	MRPS8
#INFO:	BIOGRID	INTERACTION:	MRPS5*	MRP51
#INFO:	BIOGRID	INTERACTION:	MRPS5*	MRPS9
#INFO:	BIOGRID	INTERACTION:	MRPS5*	EHD3
#INFO:	BIOGRID	INTERACTION:	MRPS5*	YJR096W
#INFO:	BIOGRID	INTERACTION:	MRPS5*	UBP10
#INFO:	BIOGRID	INTERACTION:	MRPS5*	MRP13
#INFO:	BIOGRID	INTERACTION:	MRPS5*	ATG2
#INFO:	BIOGRID	INTERACTION:	MRPS5*	HSP82
#INFO:	BIOGRID	INTERACTION:	MRPS5*	MDM38
#INFO:	BIOGRID	INTERACTION:	MRPS5*	PUS7
#INFO:	BIOGRID	INTERACTION:	MRPS5*	ECM16
#INFO:	BIOGRID	INTERACTION:	MRPS5*	MRP10
#INFO:	BIOGRID	INTERACTION:	MRPS5*	PSD2
#INFO:	BIOGRID	INTERACTION:	MRPS5*	RSM10
#INFO:	BIOGRID	INTERACTION:	MRPS5*	FYV4
#INFO:	BIOGRID	INTERACTION:	MRPS5*	RSM23
#INFO:	BIOGRID	INTERACTION:	MRPS5*	DED1
#INFO:	BIOGRID	INTERACTION:	MRPS5*	YLH47
#INFO:	BIOGRID	INTERACTION:	MRPS5*	MRPS16
#INFO:	BIOGRID	INTERACTION:	MRPS5*	YDR124W
#INFO:	BIOGRID	INTERACTION:	MRPS5*	MRPS12
#INFO:	BIOGRID	INTERACTION:	MRPS5*	YNL022C
#INFO:	BIOGRID	INTERACTION:	MRPS5*	RSM22
#INFO:	BIOGRID	INTERACTION:	MRPS5*	RSM25
#INFO:	BIOGRID	INTERACTION:	MRPS5*	ORC1
#INFO:	BIOGRID	INTERACTION:	MRPS5*	NAM9*
#INFO:	BIOGRID	INTERACTION:	MRPS5*	MRPS28
#INFO:	BIOGRID	INTERACTION:	MRPS5*	RSM26
#INFO:	BIOGRID	INTERACTION:	MRPS5*	UTP22
#INFO:	BIOGRID	INTERACTION:	MRPS5*	MAM3
#INFO:	BIOGRID	INTERACTION:	MRPS5*	CCM1
#INFO:	BIOGRID	INTERACTION:	MRPS5*	RSM7
#INFO:	BIOGRID	INTERACTION:	MRPS5*	BEM2
#INFO:	BIOGRID	INTERACTION:	MRPS5*	PAP2
#INFO:	BIOGRID	INTERACTION:	MRPS5*	PET123
#INFO:	BIOGRID	INTERACTION:	MRPS5*	MRP4
#INFO:	BIOGRID	INTERACTION:	MRPS5*	RSM24
#INFO:	BIOGRID	INTERACTION:	MRPS5*	MRP1
#INFO:	BIOGRID	INTERACTION:	MRPS5*	RIX1
#INFO:	BIOGRID	INTERACTION:	MRPS5*	SSA1
#INFO:	BIOGRID	INTERACTION:	MRPS5*	PUF3
#INFO:	BIOGRID	INTERACTION:	MRPS5*	MRPS35
#INFO:	BIOGRID	INTERACTION:	MRPS5*	MRPS18
#INFO:	BIOGRID	INTERACTION:	MRPS5*	MRP17
#INFO:	BIOGRID	INTERACTION:	RPS6B*	RPL10
#INFO:	BIOGRID	INTERACTION:	RPS6B*	RPL8A
#INFO:	BIOGRID	INTERACTION:	RPS6B*	RPS8B
#INFO:	BIOGRID	INTERACTION:	RPS6B*	KCS1
#INFO:	BIOGRID	INTERACTION:	RPS6B*	RPL9A
#INFO:	BIOGRID	INTERACTION:	RPS6B*	RPL20B
#INFO:	BIOGRID	INTERACTION:	RPS6B*	HEK2
#INFO:	BIOGRID	INTERACTION:	RPS6B*	RPL6A
#INFO:	BIOGRID	INTERACTION:	RPS6B*	RPS23B
#INFO:	BIOGRID	INTERACTION:	RPS6B*	NOP15
#INFO:	BIOGRID	INTERACTION:	RPS6B*	RPL16B
#INFO:	BIOGRID	INTERACTION:	RPS6B*	RPL31A
#INFO:	BIOGRID	INTERACTION:	RPS6B*	ISA2
#INFO:	BIOGRID	INTERACTION:	RPS6B*	RPL7B
#INFO:	BIOGRID	INTERACTION:	RPS6B*	RPS2
#INFO:	BIOGRID	INTERACTION:	RPS6B*	SLF1
#INFO:	BIOGRID	INTERACTION:	RPS6B*	MPP10
#INFO:	BIOGRID	INTERACTION:	RPS6B*	GIS2
#INFO:	BIOGRID	INTERACTION:	RPS6B*	RPS6B*
#INFO:	BIOGRID	INTERACTION:	RPS6B*	RPS16A
#INFO:	BIOGRID	INTERACTION:	RPS6B*	APL2
#INFO:	BIOGRID	INTERACTION:	RPS6B*	RPN11
#INFO:	BIOGRID	INTERACTION:	RPS6B*	SHR3
#INFO:	BIOGRID	INTERACTION:	RPS6B*	ORC1
#INFO:	BIOGRID	INTERACTION:	RPS6B*	RPS16B
#INFO:	BIOGRID	INTERACTION:	RPS6B*	SEC63
#INFO:	BIOGRID	INTERACTION:	RPS6B*	ATE1
#INFO:	BIOGRID	INTERACTION:	RPS6B*	SNL1
#INFO:	BIOGRID	INTERACTION:	RPS6B*	FIN1
#INFO:	BIOGRID	INTERACTION:	RPS6B*	YNK1
#INFO:	BIOGRID	INTERACTION:	RPS6B*	RPL26B
#INFO:	BIOGRID	INTERACTION:	RPS6B*	RPL17A
#INFO:	BIOGRID	INTERACTION:	RPS6B*	RPL28
#INFO:	BIOGRID	INTERACTION:	RPS6B*	RPL19A
#INFO:	BIOGRID	INTERACTION:	RPS6B*	RPL35A
#INFO:	BIOGRID	INTERACTION:	RPS6B*	PUF3
#INFO:	BIOGRID	INTERACTION:	RPS6B*	RPL42A
#INFO:	BIOGRID	INTERACTION:	RPS6B*	RPL18A
#INFO:	BIOGRID	INTERACTION:	RPS6B*	RPS6A
#INFO:	BIOGRID	INTERACTION:	RPS6B*	NHP6A
#INFO:	BIOGRID	INTERACTION:	RPS6B*	RPL24A
#INFO:	BIOGRID	INTERACTION:	RPS6B*	NAP1
#INFO:	BIOGRID	INTERACTION:	RPS6B*	UBI4
#INFO:	BIOGRID	INTERACTION:	RPS6B*	RPL13B
#INFO:	BIOGRID	INTERACTION:	RPS6B*	RPL15A
#INFO:	BIOGRID	INTERACTION:	RPS6B*	RPS30A
#INFO:	BIOGRID	INTERACTION:	RPS6B*	RPP0
#INFO:	BIOGRID	INTERACTION:	RPS6B*	RPS23A
#INFO:	BIOGRID	INTERACTION:	RPS6B*	RPS9B
#INFO:	BIOGRID	INTERACTION:	RPS6B*	ECM29
#INFO:	BIOGRID	INTERACTION:	RPS6B*	RPS4A
#INFO:	BIOGRID	INTERACTION:	RPS6B*	ERV41
#INFO:	BIOGRID	INTERACTION:	RPS6B*	RPL18B
#INFO:	BIOGRID	INTERACTION:	RPS6B*	RPL13A
#INFO:	BIOGRID	INTERACTION:	RPS6B*	RPS7A
#INFO:	BIOGRID	INTERACTION:	RPS6B*	RPL2A
#INFO:	BIOGRID	INTERACTION:	RPS6B*	RPS3*
#INFO:	BIOGRID	INTERACTION:	RPS6B*	RPL3
#INFO:	BIOGRID	INTERACTION:	RPS6B*	RPS11A
#INFO:	BIOGRID	INTERACTION:	RPS6B*	RPL4A
#INFO:	BIOGRID	INTERACTION:	RPS6B*	RPL1A
#INFO:	BIOGRID	INTERACTION:	RPS6B*	RPL6B
#INFO:	BIOGRID	INTERACTION:	RPS6B*	RPL36A
#INFO:	BIOGRID	INTERACTION:	RPS6B*	RPS5
#INFO:	BIOGRID	INTERACTION:	RPS6B*	PAT1
#INFO:	BIOGRID	INTERACTION:	RPS6B*	RPN1
#INFO:	BIOGRID	INTERACTION:	RPS6B*	SPB4
#INFO:	BIOGRID	INTERACTION:	RPS6B*	RPL30
#INFO:	BIOGRID	INTERACTION:	RPS6B*	BRE5
#INFO:	BIOGRID	INTERACTION:	RPS6B*	RPL7A
#INFO:	BIOGRID	INTERACTION:	RPS6B*	RPL25
#INFO:	BIOGRID	INTERACTION:	RPS6B*	RPS24B
#INFO:	BIOGRID	INTERACTION:	RPS6B*	SMT3
#INFO:	BIOGRID	INTERACTION:	RPS6B*	RPL12B
#INFO:	BIOGRID	INTERACTION:	RPS6B*	UBP13
#INFO:	BIOGRID	INTERACTION:	RPS6B*	CHZ1
#INFO:	BIOGRID	INTERACTION:	RPS6B*	NAB2
#INFO:	BIOGRID	INTERACTION:	RPS6B*	HTA2
#INFO:	BIOGRID	INTERACTION:	RPS6B*	LSM1
#INFO:	BIOGRID	INTERACTION:	RPS6B*	RPL4B
#INFO:	BIOGRID	INTERACTION:	RPS6B*	RPT5
#INFO:	BIOGRID	INTERACTION:	RPS6B*	RPL32
#INFO:	BIOGRID	INTERACTION:	RPS6B*	TPD3
#INFO:	BIOGRID	INTERACTION:	RPS6B*	RPL11B
#INFO:	BIOGRID	INTERACTION:	RPS6B*	RPL16A
#INFO:	BIOGRID	INTERACTION:	RPS6B*	RAI1
#INFO:	BIOGRID	INTERACTION:	RPS6B*	TIF5
#INFO:	BIOGRID	INTERACTION:	RPS6B*	RPL17B
#INFO:	BIOGRID	INTERACTION:	RPS6B*	RPS1A
#INFO:	BIOGRID	INTERACTION:	RPS6B*	CCL1
#INFO:	BIOGRID	INTERACTION:	RPS6B*	TSR1
#INFO:	BIOGRID	INTERACTION:	RPS6B*	RPL21A
#INFO:	BIOGRID	INTERACTION:	RPS6B*	RPL42B
#INFO:	BIOGRID	INTERACTION:	RPS6B*	POL12
#INFO:	BIOGRID	INTERACTION:	RPS6B*	RPS1B
#INFO:	BIOGRID	INTERACTION:	RPS6B*	RPL35B
#INFO:	BIOGRID	INTERACTION:	RPS6B*	RPS24A
#INFO:	BIOGRID	INTERACTION:	RPS6B*	RPL27B
#INFO:	BIOGRID	INTERACTION:	RPS6B*	RPS13
#INFO:	BIOGRID	INTERACTION:	RPS6B*	UBP3
#INFO:	BIOGRID	INTERACTION:	RPS6B*	RPS14A
#INFO:	BIOGRID	INTERACTION:	RPS6B*	IDH1
#INFO:	BIOGRID	INTERACTION:	RPS6B*	ULP2
#INFO:	BIOGRID	INTERACTION:	RPS6B*	SBP1
#INFO:	BIOGRID	INTERACTION:	RPS6B*	RPL19B
#INFO:	BIOGRID	INTERACTION:	RPS6B*	ENP1
#INFO:	BIOGRID	INTERACTION:	RPS6B*	PUF4
#INFO:	BIOGRID	INTERACTION:	RPS6B*	RPL14B
#INFO:	BIOGRID	INTERACTION:	RPS6B*	RPS30B
#INFO:	BIOGRID	INTERACTION:	RPS6B*	RPL12A
#INFO:	BIOGRID	INTERACTION:	RPS6B*	RPS4B
#INFO:	BIOGRID	INTERACTION:	RPS6B*	KRE33
#INFO:	BIOGRID	INTERACTION:	RPS6B*	RPS7B
#INFO:	BIOGRID	INTERACTION:	RPS6B*	RPL1B
#INFO:	BIOGRID	INTERACTION:	RPS6B*	RPL2B
#INFO:	BIOGRID	INTERACTION:	RPS6B*	RPF2
#INFO:	BIOGRID	INTERACTION:	RPS6B*	MRD1
#INFO:	BIOGRID	INTERACTION:	RPS6B*	LSM5
#INFO:	BIOGRID	INTERACTION:	RPS6B*	RPS8A
#INFO:	BIOGRID	INTERACTION:	RPS6B*	DED1
#INFO:	BIOGRID	INTERACTION:	RPS6B*	URA7
#INFO:	BIOGRID	INTERACTION:	RPS6B*	RPL20A
#INFO:	BIOGRID	INTERACTION:	RPS6B*	DPB2
#INFO:	BIOGRID	INTERACTION:	RPS6B*	DHH1
#INFO:	BIOGRID	INTERACTION:	RPS6B*	RPL8B
#INFO:	BIOGRID	INTERACTION:	RPS6B*	RPS17B
#INFO:	BIOGRID	INTERACTION:	RPS6B*	SRO9
#INFO:	BIOGRID	INTERACTION:	RPS6B*	DSN1
#INFO:	BIOGRID	INTERACTION:	RPS6B*	RPS11B
#INFO:	BIOGRID	INTERACTION:	RPS6B*	RPL26A
#INFO:	BIOGRID	INTERACTION:	RPS6B*	RPA135
#INFO:	BIOGRID	INTERACTION:	RPS6B*	RPS15
#INFO:	BIOGRID	INTERACTION:	RPS6B*	RIO2
#INFO:	BIOGRID	INTERACTION:	NAM9*	RSM23
#INFO:	BIOGRID	INTERACTION:	NAM9*	NAB2
#INFO:	BIOGRID	INTERACTION:	NAM9*	YLH47
#INFO:	BIOGRID	INTERACTION:	NAM9*	MRPS16
#INFO:	BIOGRID	INTERACTION:	NAM9*	RSM18
#INFO:	BIOGRID	INTERACTION:	NAM9*	RSM22
#INFO:	BIOGRID	INTERACTION:	NAM9*	UBI4
#INFO:	BIOGRID	INTERACTION:	NAM9*	RSM25
#INFO:	BIOGRID	INTERACTION:	NAM9*	RSM28
#INFO:	BIOGRID	INTERACTION:	NAM9*	MRPS28
#INFO:	BIOGRID	INTERACTION:	NAM9*	RSM26
#INFO:	BIOGRID	INTERACTION:	NAM9*	MRP51
#INFO:	BIOGRID	INTERACTION:	NAM9*	RSM7
#INFO:	BIOGRID	INTERACTION:	NAM9*	MRPS9
#INFO:	BIOGRID	INTERACTION:	NAM9*	MRPS8
#INFO:	BIOGRID	INTERACTION:	NAM9*	RSM27
#INFO:	BIOGRID	INTERACTION:	NAM9*	EHD3
#INFO:	BIOGRID	INTERACTION:	NAM9*	MRP13
#INFO:	BIOGRID	INTERACTION:	NAM9*	PET123
#INFO:	BIOGRID	INTERACTION:	NAM9*	MRP4
#INFO:	BIOGRID	INTERACTION:	NAM9*	RSM24
#INFO:	BIOGRID	INTERACTION:	NAM9*	MDM38
#INFO:	BIOGRID	INTERACTION:	NAM9*	MRP1
#INFO:	BIOGRID	INTERACTION:	NAM9*	PUF3
#INFO:	BIOGRID	INTERACTION:	NAM9*	MAM33
#INFO:	BIOGRID	INTERACTION:	NAM9*	MRPS35
#INFO:	BIOGRID	INTERACTION:	NAM9*	RSM10
#INFO:	BIOGRID	INTERACTION:	NAM9*	MRPS18
#INFO:	BIOGRID	INTERACTION:	NAM9*	MRP17
#INFO:	BIOGRID	INTERACTION:	MRPS17*	NAB2
#INFO:	BIOGRID	INTERACTION:	MRPS17*	KOG1
#INFO:	BIOGRID	INTERACTION:	MRPS17*	VAM3
#INFO:	BIOGRID	INTERACTION:	MRPS17*	SED5
#INFO:	BIOGRID	INTERACTION:	MRPS17*	RSM19
#INFO:	BIOGRID	INTERACTION:	MRPS17*	MRPS5*
#INFO:	BIOGRID	INTERACTION:	MRPS17*	YHR192W
#INFO:	BIOGRID	INTERACTION:	MRPS17*	RSM27
#INFO:	BIOGRID	INTERACTION:	MRPS17*	MRP51
#INFO:	BIOGRID	INTERACTION:	MRPS17*	MRPS9
#INFO:	BIOGRID	INTERACTION:	MRPS17*	MRPS8
#INFO:	BIOGRID	INTERACTION:	MRPS17*	EHD3
#INFO:	BIOGRID	INTERACTION:	MRPS17*	MRP13
#INFO:	BIOGRID	INTERACTION:	MRPS17*	ATG17
#INFO:	BIOGRID	INTERACTION:	MRPS17*	HMS2
#INFO:	BIOGRID	INTERACTION:	MRPS17*	MDM38
#INFO:	BIOGRID	INTERACTION:	MRPS17*	GIS2
#INFO:	BIOGRID	INTERACTION:	MRPS17*	RSM10
#INFO:	BIOGRID	INTERACTION:	MRPS17*	RSM23
#INFO:	BIOGRID	INTERACTION:	MRPS17*	YLH47
#INFO:	BIOGRID	INTERACTION:	MRPS17*	YDR124W
#INFO:	BIOGRID	INTERACTION:	MRPS17*	MRPS12
#INFO:	BIOGRID	INTERACTION:	MRPS17*	MRPS16
#INFO:	BIOGRID	INTERACTION:	MRPS17*	RSM22
#INFO:	BIOGRID	INTERACTION:	MRPS17*	RSM25
#INFO:	BIOGRID	INTERACTION:	MRPS17*	NAM9*
#INFO:	BIOGRID	INTERACTION:	MRPS17*	MRPS28
#INFO:	BIOGRID	INTERACTION:	MRPS17*	RSM26
#INFO:	BIOGRID	INTERACTION:	MRPS17*	RSM7
#INFO:	BIOGRID	INTERACTION:	MRPS17*	MRPS17*
#INFO:	BIOGRID	INTERACTION:	MRPS17*	MRP21*
#INFO:	BIOGRID	INTERACTION:	MRPS17*	MRP4
#INFO:	BIOGRID	INTERACTION:	MRPS17*	RSM24
#INFO:	BIOGRID	INTERACTION:	MRPS17*	PET123
#INFO:	BIOGRID	INTERACTION:	MRPS17*	MRP1
#INFO:	BIOGRID	INTERACTION:	MRPS17*	PUF3
#INFO:	BIOGRID	INTERACTION:	MRPS17*	MRPS35
#INFO:	BIOGRID	INTERACTION:	MRPS17*	MRPS18
#INFO:	BIOGRID	INTERACTION:	MRPS17*	HSK3
#INFO:	BIOGRID	INTERACTION:	RPS3*	RPL10
#INFO:	BIOGRID	INTERACTION:	RPS3*	RPL8A
#INFO:	BIOGRID	INTERACTION:	RPS3*	RPS8B
#INFO:	BIOGRID	INTERACTION:	RPS3*	RPS14B
#INFO:	BIOGRID	INTERACTION:	RPS3*	RPL9A
#INFO:	BIOGRID	INTERACTION:	RPS3*	LTV1
#INFO:	BIOGRID	INTERACTION:	RPS3*	RPL20B
#INFO:	BIOGRID	INTERACTION:	RPS3*	RPL6A
#INFO:	BIOGRID	INTERACTION:	RPS3*	SSZ1
#INFO:	BIOGRID	INTERACTION:	RPS3*	RPL16B
#INFO:	BIOGRID	INTERACTION:	RPS3*	PHO91
#INFO:	BIOGRID	INTERACTION:	RPS3*	RPL7B
#INFO:	BIOGRID	INTERACTION:	RPS3*	NAT5
#INFO:	BIOGRID	INTERACTION:	RPS3*	FUN12
#INFO:	BIOGRID	INTERACTION:	RPS3*	GSP2
#INFO:	BIOGRID	INTERACTION:	RPS3*	RPS2
#INFO:	BIOGRID	INTERACTION:	RPS3*	GIS2
#INFO:	BIOGRID	INTERACTION:	RPS3*	RPS16A
#INFO:	BIOGRID	INTERACTION:	RPS3*	TPK2
#INFO:	BIOGRID	INTERACTION:	RPS3*	RPN11
#INFO:	BIOGRID	INTERACTION:	RPS3*	TMA20
#INFO:	BIOGRID	INTERACTION:	RPS3*	ORC1
#INFO:	BIOGRID	INTERACTION:	RPS3*	MCA1
#INFO:	BIOGRID	INTERACTION:	RPS3*	RPS16B
#INFO:	BIOGRID	INTERACTION:	RPS3*	SEC63
#INFO:	BIOGRID	INTERACTION:	RPS3*	TSA1
#INFO:	BIOGRID	INTERACTION:	RPS3*	SNL1
#INFO:	BIOGRID	INTERACTION:	RPS3*	ARB1
#INFO:	BIOGRID	INTERACTION:	RPS3*	PGI1
#INFO:	BIOGRID	INTERACTION:	RPS3*	FIN1
#INFO:	BIOGRID	INTERACTION:	RPS3*	YNK1
#INFO:	BIOGRID	INTERACTION:	RPS3*	RPL26B
#INFO:	BIOGRID	INTERACTION:	RPS3*	RPL17A
#INFO:	BIOGRID	INTERACTION:	RPS3*	RPL28
#INFO:	BIOGRID	INTERACTION:	RPS3*	RPL19A
#INFO:	BIOGRID	INTERACTION:	RPS3*	SCD6
#INFO:	BIOGRID	INTERACTION:	RPS3*	PUF3
#INFO:	BIOGRID	INTERACTION:	RPS3*	RPS18A
#INFO:	BIOGRID	INTERACTION:	RPS3*	ESF2
#INFO:	BIOGRID	INTERACTION:	RPS3*	RPL18A
#INFO:	BIOGRID	INTERACTION:	RPS3*	ESF1
#INFO:	BIOGRID	INTERACTION:	RPS3*	RRB1
#INFO:	BIOGRID	INTERACTION:	RPS3*	RPS6A
#INFO:	BIOGRID	INTERACTION:	RPS3*	PWP2
#INFO:	BIOGRID	INTERACTION:	RPS3*	UBI4
#INFO:	BIOGRID	INTERACTION:	RPS3*	NAF1
#INFO:	BIOGRID	INTERACTION:	RPS3*	RPL13B
#INFO:	BIOGRID	INTERACTION:	RPS3*	RPL15A
#INFO:	BIOGRID	INTERACTION:	RPS3*	RPS30A
#INFO:	BIOGRID	INTERACTION:	RPS3*	HRR25
#INFO:	BIOGRID	INTERACTION:	RPS3*	YAR1
#INFO:	BIOGRID	INTERACTION:	RPS3*	ARD1
#INFO:	BIOGRID	INTERACTION:	RPS3*	RPP0
#INFO:	BIOGRID	INTERACTION:	RPS3*	RPS9B
#INFO:	BIOGRID	INTERACTION:	RPS3*	ECM29
#INFO:	BIOGRID	INTERACTION:	RPS3*	RPS4A
#INFO:	BIOGRID	INTERACTION:	RPS3*	RPS10B
#INFO:	BIOGRID	INTERACTION:	RPS3*	RPL18B
#INFO:	BIOGRID	INTERACTION:	RPS3*	RPL13A
#INFO:	BIOGRID	INTERACTION:	RPS3*	RPS18B
#INFO:	BIOGRID	INTERACTION:	RPS3*	RPS7A
#INFO:	BIOGRID	INTERACTION:	RPS3*	RPL2A
#INFO:	BIOGRID	INTERACTION:	RPS3*	RPL3
#INFO:	BIOGRID	INTERACTION:	RPS3*	RPS11A
#INFO:	BIOGRID	INTERACTION:	RPS3*	NOB1
#INFO:	BIOGRID	INTERACTION:	RPS3*	RPL4A
#INFO:	BIOGRID	INTERACTION:	RPS3*	RPL1A
#INFO:	BIOGRID	INTERACTION:	RPS3*	RPL6B
#INFO:	BIOGRID	INTERACTION:	RPS3*	RPL36A
#INFO:	BIOGRID	INTERACTION:	RPS3*	RPS5
#INFO:	BIOGRID	INTERACTION:	RPS3*	TPK3
#INFO:	BIOGRID	INTERACTION:	RPS3*	RPN1
#INFO:	BIOGRID	INTERACTION:	RPS3*	SPB4
#INFO:	BIOGRID	INTERACTION:	RPS3*	BRE5
#INFO:	BIOGRID	INTERACTION:	RPS3*	RPL7A
#INFO:	BIOGRID	INTERACTION:	RPS3*	PRP19
#INFO:	BIOGRID	INTERACTION:	RPS3*	MOT1
#INFO:	BIOGRID	INTERACTION:	RPS3*	RPL25
#INFO:	BIOGRID	INTERACTION:	RPS3*	RPS24B
#INFO:	BIOGRID	INTERACTION:	RPS3*	SMT3
#INFO:	BIOGRID	INTERACTION:	RPS3*	RPL12B
#INFO:	BIOGRID	INTERACTION:	RPS3*	UBP13
#INFO:	BIOGRID	INTERACTION:	RPS3*	HBS1
#INFO:	BIOGRID	INTERACTION:	RPS3*	KRI1
#INFO:	BIOGRID	INTERACTION:	RPS3*	CCT6
#INFO:	BIOGRID	INTERACTION:	RPS3*	NAB2
#INFO:	BIOGRID	INTERACTION:	RPS3*	IMD3
#INFO:	BIOGRID	INTERACTION:	RPS3*	HTA2
#INFO:	BIOGRID	INTERACTION:	RPS3*	URB1
#INFO:	BIOGRID	INTERACTION:	RPS3*	RPL4B
#INFO:	BIOGRID	INTERACTION:	RPS3*	RPT5
#INFO:	BIOGRID	INTERACTION:	RPS3*	LSG1
#INFO:	BIOGRID	INTERACTION:	RPS3*	KRR1
#INFO:	BIOGRID	INTERACTION:	RPS3*	RPL11B
#INFO:	BIOGRID	INTERACTION:	RPS3*	RPL16A
#INFO:	BIOGRID	INTERACTION:	RPS3*	RAI1
#INFO:	BIOGRID	INTERACTION:	RPS3*	RPS20
#INFO:	BIOGRID	INTERACTION:	RPS3*	TIF5
#INFO:	BIOGRID	INTERACTION:	RPS3*	RPL17B
#INFO:	BIOGRID	INTERACTION:	RPS3*	GCN1
#INFO:	BIOGRID	INTERACTION:	RPS3*	RPS1A
#INFO:	BIOGRID	INTERACTION:	RPS3*	ACS2
#INFO:	BIOGRID	INTERACTION:	RPS3*	VPS52
#INFO:	BIOGRID	INTERACTION:	RPS3*	RPN10
#INFO:	BIOGRID	INTERACTION:	RPS3*	ANP1
#INFO:	BIOGRID	INTERACTION:	RPS3*	DBP8
#INFO:	BIOGRID	INTERACTION:	RPS3*	RPL21A
#INFO:	BIOGRID	INTERACTION:	RPS3*	RPS1B
#INFO:	BIOGRID	INTERACTION:	RPS3*	ZUO1
#INFO:	BIOGRID	INTERACTION:	RPS3*	RPS24A
#INFO:	BIOGRID	INTERACTION:	RPS3*	RPL27B
#INFO:	BIOGRID	INTERACTION:	RPS3*	RPS13
#INFO:	BIOGRID	INTERACTION:	RPS3*	UBP3
#INFO:	BIOGRID	INTERACTION:	RPS3*	RPS14A
#INFO:	BIOGRID	INTERACTION:	RPS3*	ULP2
#INFO:	BIOGRID	INTERACTION:	RPS3*	HHF2
#INFO:	BIOGRID	INTERACTION:	RPS3*	RPL19B
#INFO:	BIOGRID	INTERACTION:	RPS3*	ENP1
#INFO:	BIOGRID	INTERACTION:	RPS3*	HHF1
#INFO:	BIOGRID	INTERACTION:	RPS3*	RPL14B
#INFO:	BIOGRID	INTERACTION:	RPS3*	RPS30B
#INFO:	BIOGRID	INTERACTION:	RPS3*	RPL12A
#INFO:	BIOGRID	INTERACTION:	RPS3*	RPS4B
#INFO:	BIOGRID	INTERACTION:	RPS3*	KRE33
#INFO:	BIOGRID	INTERACTION:	RPS3*	REB1
#INFO:	BIOGRID	INTERACTION:	RPS3*	RPS7B
#INFO:	BIOGRID	INTERACTION:	RPS3*	RPL1B
#INFO:	BIOGRID	INTERACTION:	RPS3*	RPL2B
#INFO:	BIOGRID	INTERACTION:	RPS3*	RPL5
#INFO:	BIOGRID	INTERACTION:	RPS3*	MRD1
#INFO:	BIOGRID	INTERACTION:	RPS3*	MDM20
#INFO:	BIOGRID	INTERACTION:	RPS3*	RPS8A
#INFO:	BIOGRID	INTERACTION:	RPS3*	RRP1
#INFO:	BIOGRID	INTERACTION:	RPS3*	TAF1
#INFO:	BIOGRID	INTERACTION:	RPS3*	MAK3
#INFO:	BIOGRID	INTERACTION:	RPS3*	STM1
#INFO:	BIOGRID	INTERACTION:	RPS3*	RPL20A
#INFO:	BIOGRID	INTERACTION:	RPS3*	RPG1
#INFO:	BIOGRID	INTERACTION:	RPS3*	NAM2
#INFO:	BIOGRID	INTERACTION:	RPS3*	DHH1
#INFO:	BIOGRID	INTERACTION:	RPS3*	ADE5,7
#INFO:	BIOGRID	INTERACTION:	RPS3*	GNP1
#INFO:	BIOGRID	INTERACTION:	RPS3*	TIF35
#INFO:	BIOGRID	INTERACTION:	RPS3*	RPL8B
#INFO:	BIOGRID	INTERACTION:	RPS3*	RPS17B
#INFO:	BIOGRID	INTERACTION:	RPS3*	DSN1
#INFO:	BIOGRID	INTERACTION:	RPS3*	RPS11B
#INFO:	BIOGRID	INTERACTION:	RPS3*	NAT4
#INFO:	BIOGRID	INTERACTION:	RPS3*	RPS22A
#INFO:	BIOGRID	INTERACTION:	RPS3*	RPS15
#INFO:	BIOGRID	INTERACTION:	RPS3*	RIO2
#INFO:	BIOGRID	INTERACTION:	COX17*	COX17*
#INFO:	BIOGRID	INTERACTION:	COX17*	NAB2
#INFO:	BIOGRID	INTERACTION:	COX17*	SCO1
#INFO:	BIOGRID	INTERACTION:	COX17*	SRO9
#INFO:	BIOGRID	INTERACTION:	COX17*	HEK2
#INFO:	BIOGRID	INTERACTION:	COX17*	MIA40
#INFO:	BIOGRID	INTERACTION:	COX17*	SBP1
#INFO:	BIOGRID	INTERACTION:	COX17*	PUF3
#INFO:	BIOGRID	INTERACTION:	COX17*	PRP40
#INFO:	BIOGRID	INTERACTION:	COX17*	GIS2
#INFO:	BIOGRID	INTERACTION:	RPS19B*	NAB2
#INFO:	BIOGRID	INTERACTION:	RPS19B*	PUF4
#INFO:	BIOGRID	INTERACTION:	RPS19B*	RPS30B
#INFO:	BIOGRID	INTERACTION:	RPS19B*	RPL20B
#INFO:	BIOGRID	INTERACTION:	RPS19B*	UBI4
#INFO:	BIOGRID	INTERACTION:	RPS19B*	NAF1
#INFO:	BIOGRID	INTERACTION:	RPS19B*	RPS30A
#INFO:	BIOGRID	INTERACTION:	RPS19B*	PHO4
#INFO:	BIOGRID	INTERACTION:	RPS19B*	RPL2B
#INFO:	BIOGRID	INTERACTION:	RPS19B*	SLF1
#INFO:	BIOGRID	INTERACTION:	RPS19B*	GIS2
#INFO:	BIOGRID	INTERACTION:	RPS19B*	RPL2A
#INFO:	BIOGRID	INTERACTION:	RPS19B*	RPL17B
#INFO:	BIOGRID	INTERACTION:	RPS19B*	RPN11
#INFO:	BIOGRID	INTERACTION:	RPS19B*	RPN10
#INFO:	BIOGRID	INTERACTION:	RPS19B*	RPL36A
#INFO:	BIOGRID	INTERACTION:	RPS19B*	RPS5
#INFO:	BIOGRID	INTERACTION:	RPS19B*	SPO12
#INFO:	BIOGRID	INTERACTION:	RPS19B*	RPL42B
#INFO:	BIOGRID	INTERACTION:	RPS19B*	RPL20A
#INFO:	BIOGRID	INTERACTION:	RPS19B*	DHH1
#INFO:	BIOGRID	INTERACTION:	RPS19B*	BRE5
#INFO:	BIOGRID	INTERACTION:	RPS19B*	RPS17B
#INFO:	BIOGRID	INTERACTION:	RPS19B*	ARB1
#INFO:	BIOGRID	INTERACTION:	RPS19B*	PRP19
#INFO:	BIOGRID	INTERACTION:	RPS19B*	RPL35B
#INFO:	BIOGRID	INTERACTION:	RPS19B*	SRO9
#INFO:	BIOGRID	INTERACTION:	RPS19B*	DSN1
#INFO:	BIOGRID	INTERACTION:	RPS19B*	UBP3
[truncated: 562 more rows]
[truncated: 24 more columns]

## Sheet: RMxBY & BYxBY different,no eQTL
No significant hits at p < 0.001
