# Supplementary figures and images for: Heritability and genetic basis of protein level variation in an outbred population
Source: HighWire-hosted journal article supplement (doi:10.1101/gr.170506.113), 2014-05-13

Supplementary Figure 3

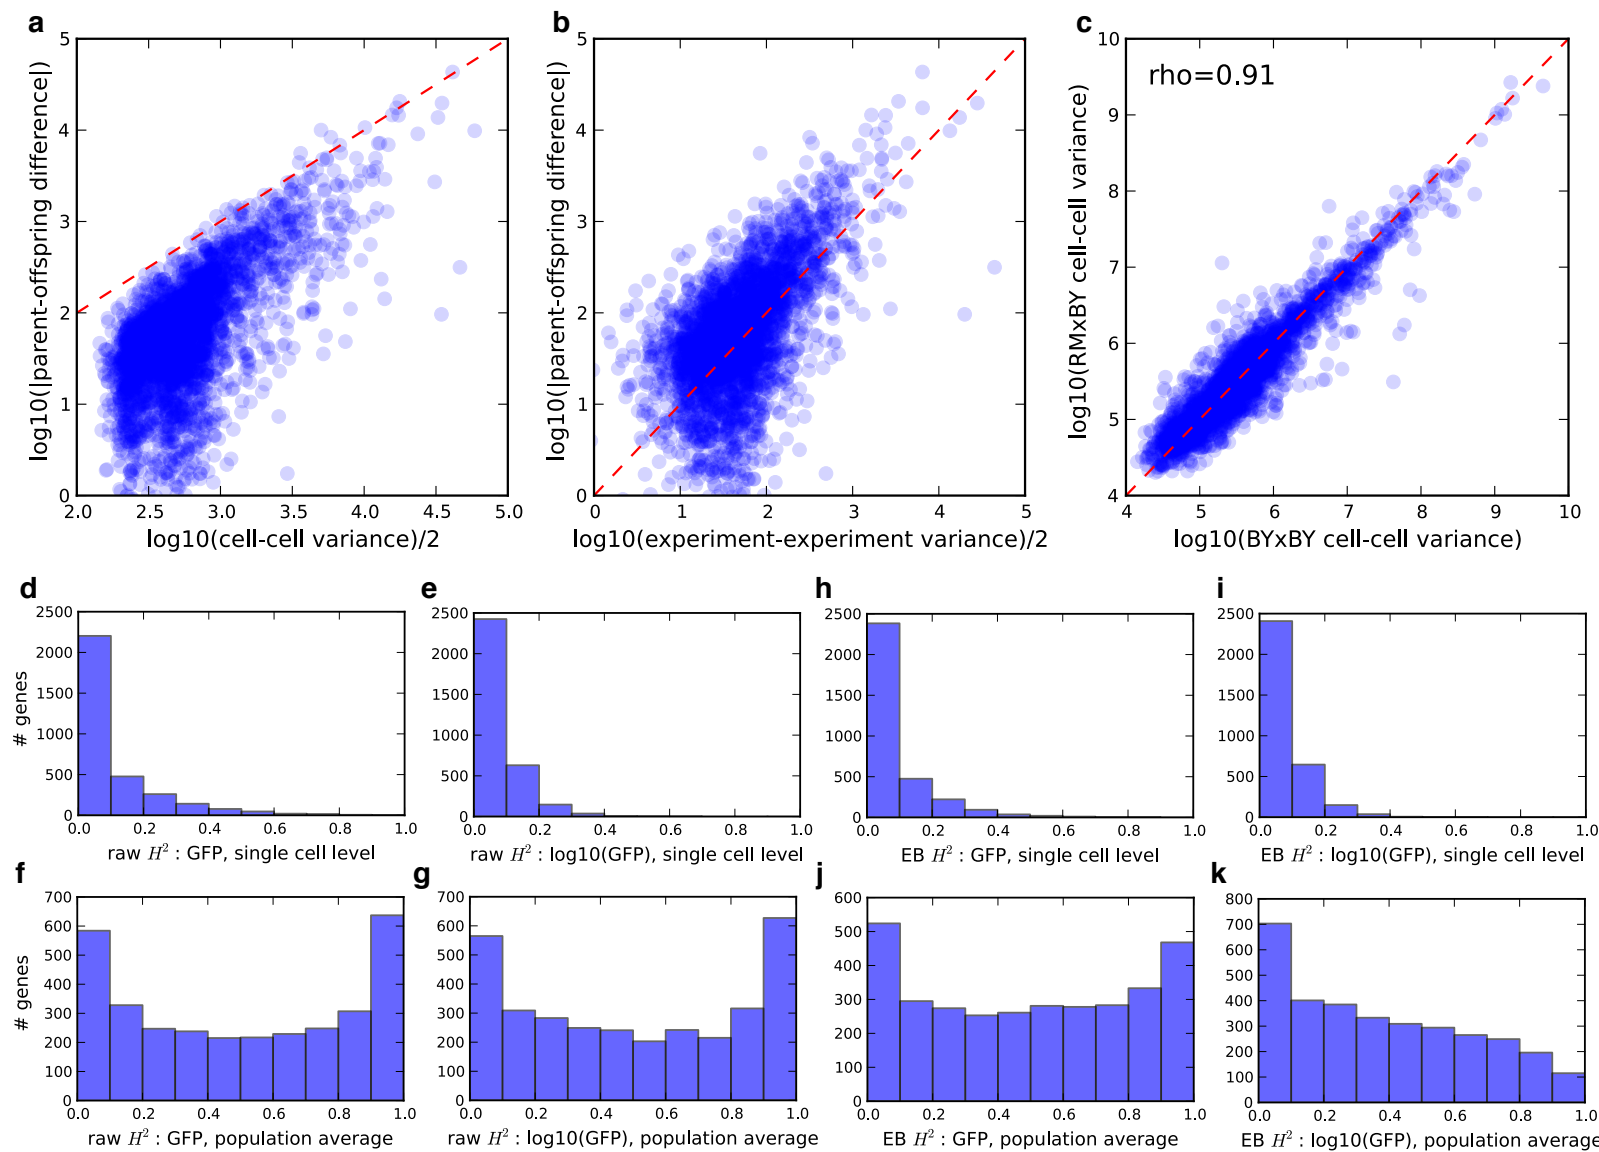

Supplement: Supplemental_Figure_S3.pdf [file Supplemental_Figure_S3.pdf]

Supplemental Figure 6

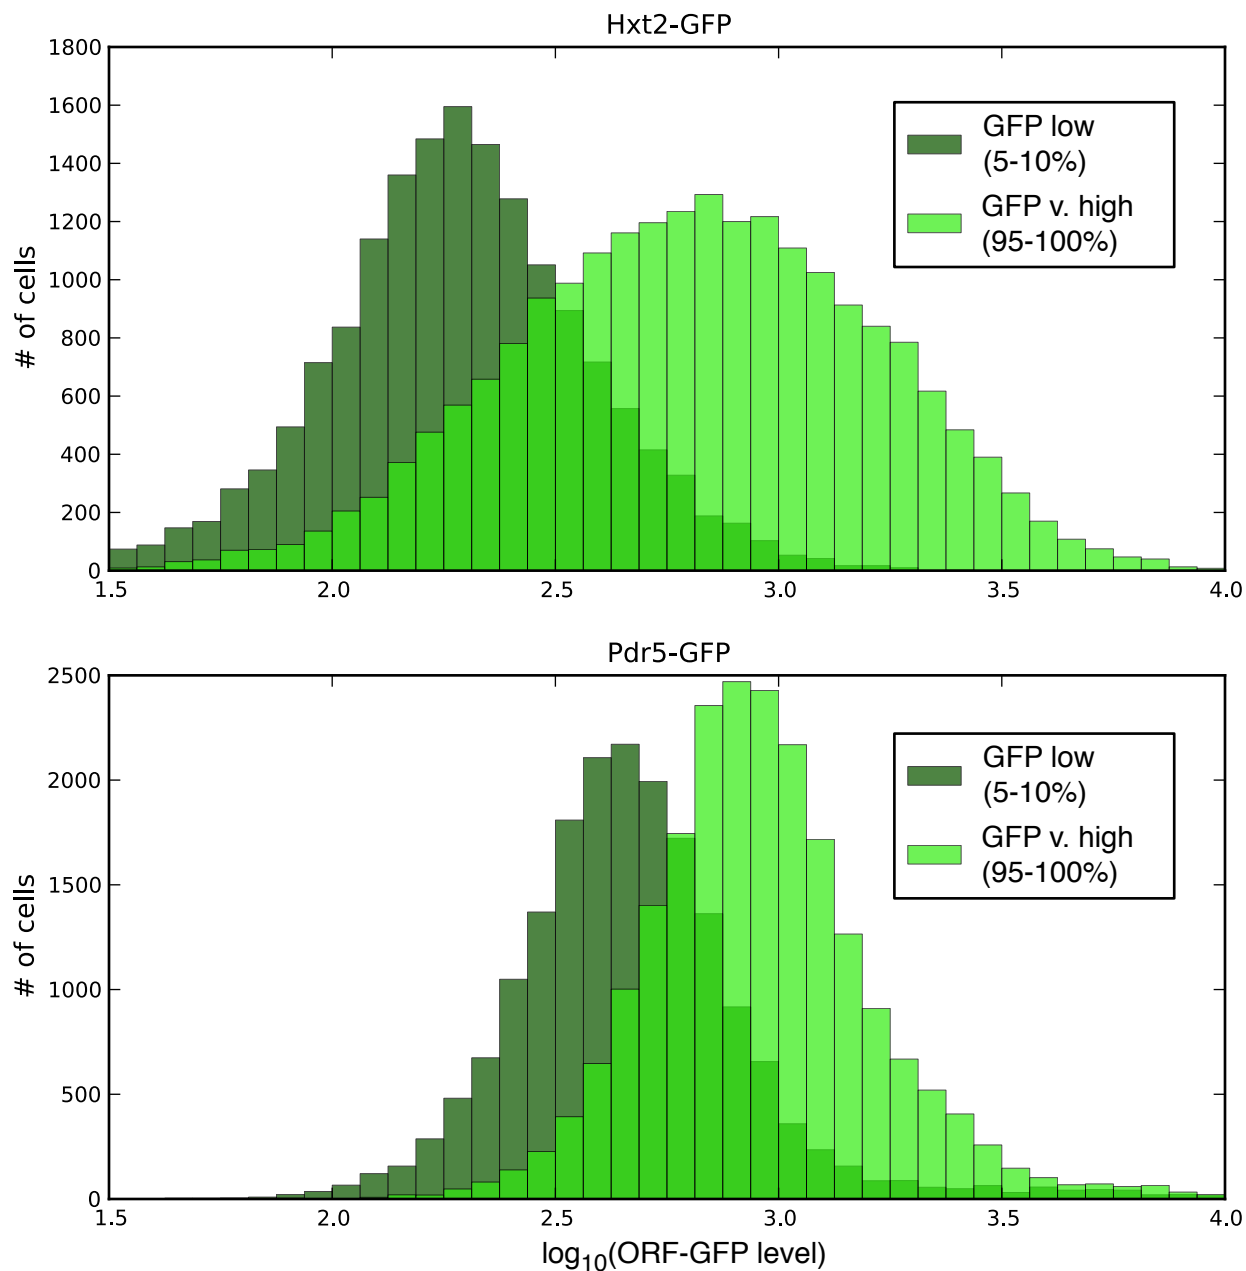

Supplement: Supplemental_Figure_S6.pdf [file Supplemental_Figure_S6.pdf]
